# Supplementary material
Source: PubMed Central journal article supplement (PMC7954990)

# Supporting Information

## Tetrahydroindazole inhibitors of CDK2-cylin complexes

Jae Chul Lee,<sup>1</sup> Kwon Ho Hong,<sup>1</sup> Andreas Becker,<sup>2</sup> Joseph S. Tash,<sup>3</sup> Ernst Schönbrunn,<sup>2</sup> and Gunda I. Georg<sup>1,\*</sup>

<sup>1</sup> Department of Medicinal Chemistry, Institute for Therapeutics Discovery and Development, College of Pharmacy, University of Minnesota, 717 Delaware Street, SE, Minneapolis, MN 55455, USA

<sup>2</sup> Drug Discovery Department, Moffitt Cancer Center, 12902 Magnolia Drive, Tampa, FL 33612, USA

<sup>3</sup> Department of Molecular and Integrative Physiology, University of Kansas Medical Center, 3901 Rainbow Boulevard, Kansas City, KS 66160, USA

[georg@umn.edu](mailto:georg@umn.edu)

### Table of Contents

|                                                                                                         |    |
|---------------------------------------------------------------------------------------------------------|----|
| Fig. S1. Inhibition of the CDK2-cylin A complex by hit <b>3</b> -----                                   | S2 |
| Fig. S2. SAR of hit. <b>3</b> derivatives-----                                                          | S3 |
| Fig. S3. IC <sub>50</sub> data for compounds <b>3</b> , <b>53</b> and <b>59</b> and staurosporine ----- | S4 |
| as the positive control for CDK2/cyclin complexes                                                       |    |
| <sup>1</sup> H and <sup>13</sup> C NMR spectra-----                                                     | S6 |

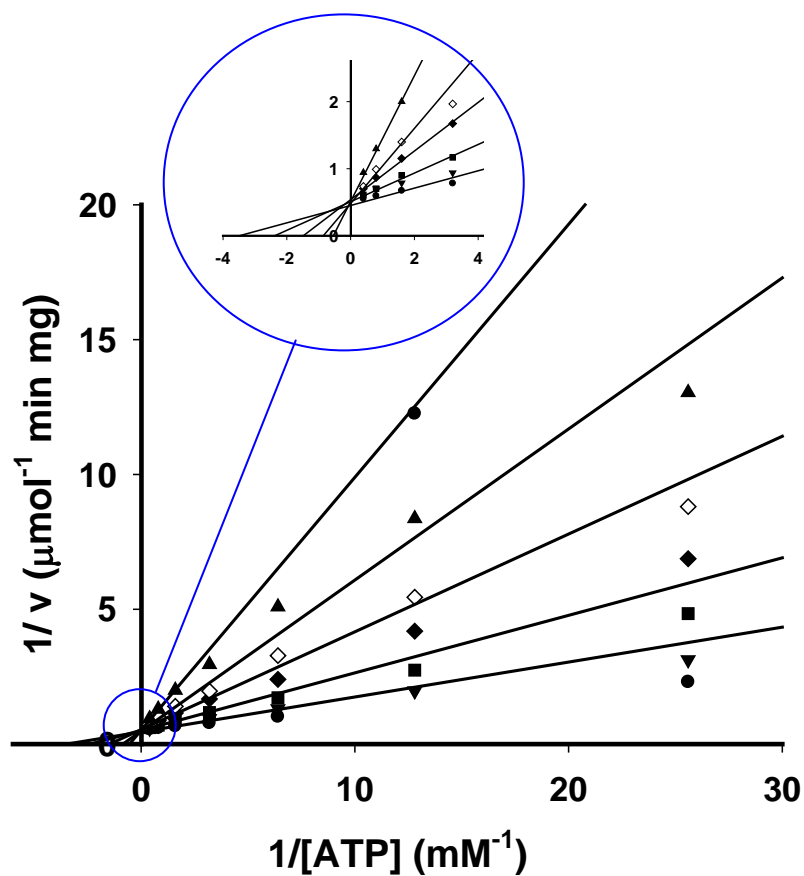

**Fig. S1. Inhibition of the CDK2-cylin A complex by hit 3.** Lineweaver-Burk presentation of initial velocities against ATP. The peptide substrate was held constant at 0.5 mM. Concentrations of **3** were ( $\bullet$ ) 0  $\mu\text{M}$ , ( $\blacktriangledown$ ) 0.5  $\mu\text{M}$ , ( $\blacksquare$ ) 1.9  $\mu\text{M}$ , ( $\blacklozenge$ ) 3.9  $\mu\text{M}$ , ( $\diamond$ ) 7.8  $\mu\text{M}$ , ( $\blacktriangle$ ) 15.6  $\mu\text{M}$ . The common y-axis intercept (circled view) indicates competitive inhibition. Data were fitted to the Michaelis-Menten equation  $v = V_{\text{max}} * [\text{S}] / (K_{\text{mobs}}([\text{I}]) + [\text{S}])$  and  $K_i$  values were determined by fitting the observed  $K_m$  values =  $K_m (1 + [\text{I}] / K_i)$ .

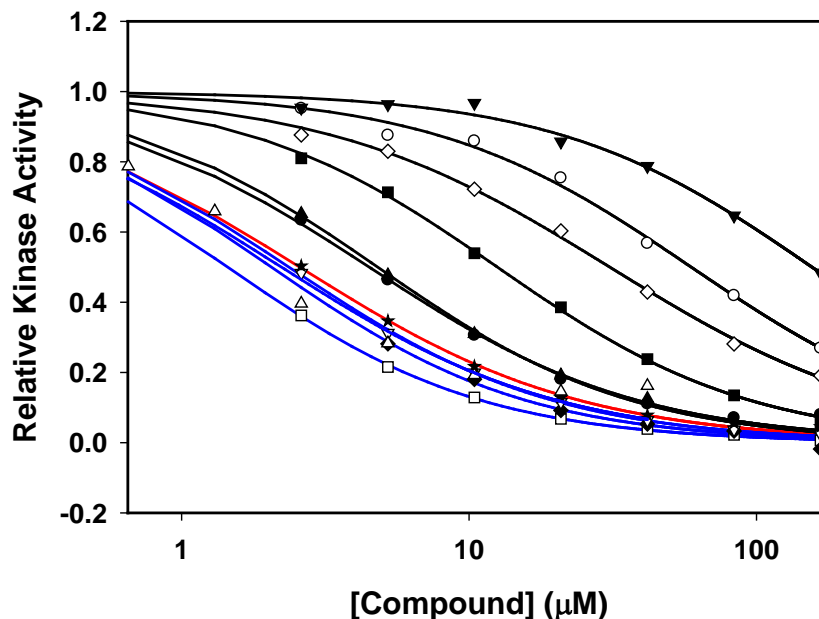

**Fig. S2. SAR of hit 3 derivatives.** Displayed are dose-response curves of selected analogues: (●) **12** (R6 = N<sub>3</sub>; IC<sub>50</sub> = 4.5 +/- 0.2 μM), (▲) **18b-trans** (R5 = CH<sub>3</sub>, H; IC<sub>50</sub> = 4.8 +/- 0.1 μM, for comparison (◇) **18b-cis** (R5 = H, CH<sub>3</sub>; IC<sub>50</sub> = 31 +/- 0.9 μM), (■) **21** (R4 = -CH<sub>2</sub>-NH-; IC<sub>50</sub> = 12 +/- 3 μM), (○) **23** (R3 = =NOH; IC<sub>50</sub> = 59 +/- 3 μM), (▼) **25** (R2 = H; IC<sub>50</sub> = 160 +/- 10 μM), (□) **59** (R1 = pyrimidin-4-yl; IC<sub>50</sub> = 1.5 +/- 0.03 μM), (△) **53** (R1 = thiazol-2-yl; IC<sub>50</sub> = 2.2 +/- 0.3 μM), (◆) **64** (R1 = methoxypyridin-2-yl; IC<sub>50</sub> = 2.1 +/- 0.3 μM), (▽) **72** (R1 = pyridin-3-yl-sulfamoylamide; IC<sub>50</sub> = 2.4 +/- 0.05 μM), and (★) **3** (IC<sub>50</sub> = 2.6 +/- 0.1 μM); IC<sub>50</sub> values were obtained by fitting the data to the equation  $A/A_0 = 1/(1+([I]/IC_{50})^n)$ . The blue lines represent compounds with increased inhibitory activity over the parent compound **3** (red line).

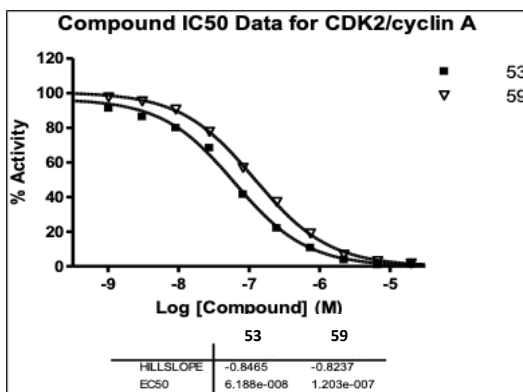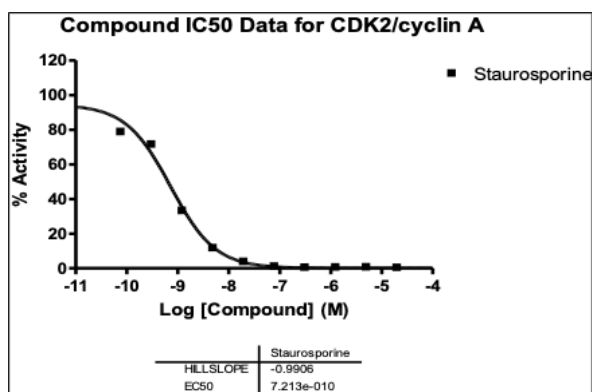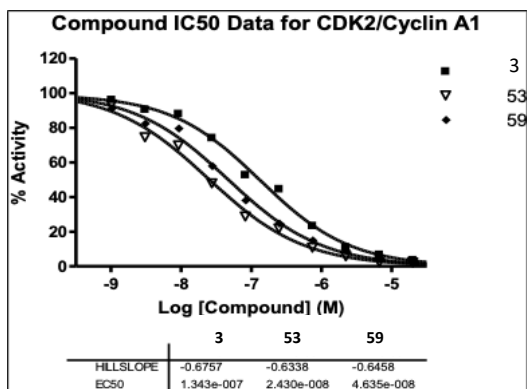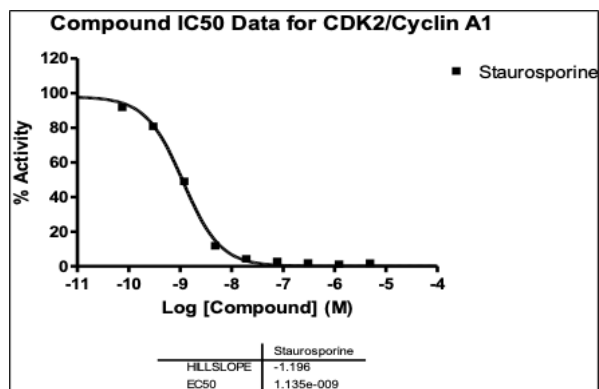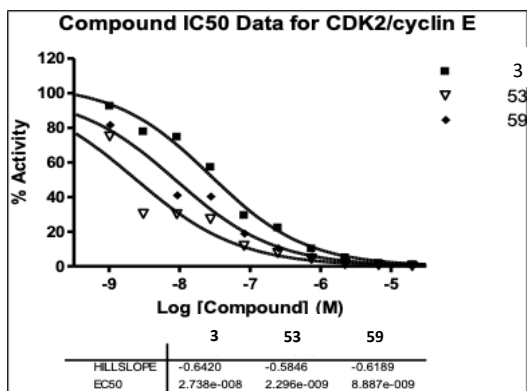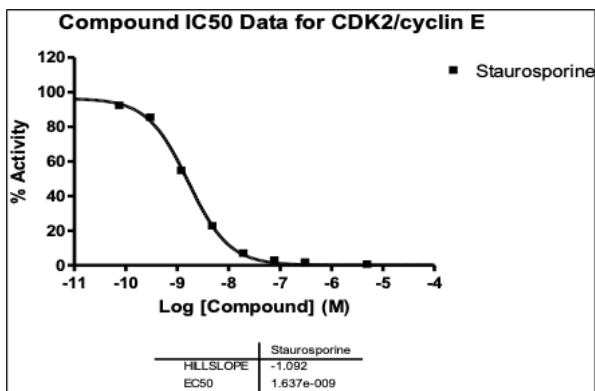

**Fig. S3.** IC<sub>50</sub> data generated by Reaction Biology for compounds **3**, **53** and **59** and staurosporine as the positive control for CDK2/cyclin complexes.

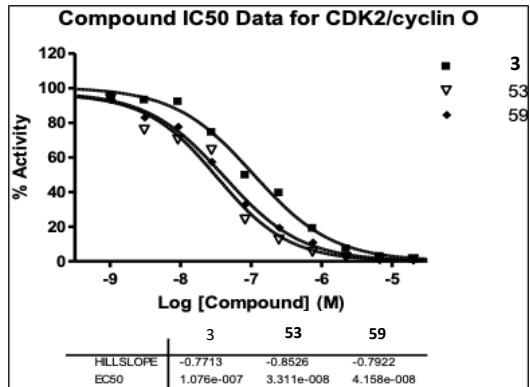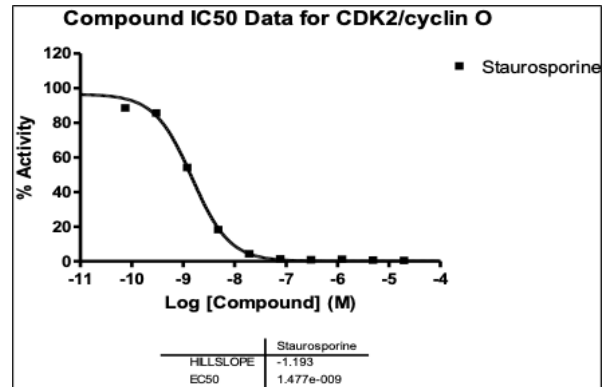

**Fig. S3 cont.** IC<sub>50</sub> data generated by Reaction Biology for compounds **3**, **53** and **59** and staurosporine as the positive control for CDK2/cyclin complexes.

# 1H-NMR

JL-040408 1 1 C:\Bruker\TOPSPIN leex3451

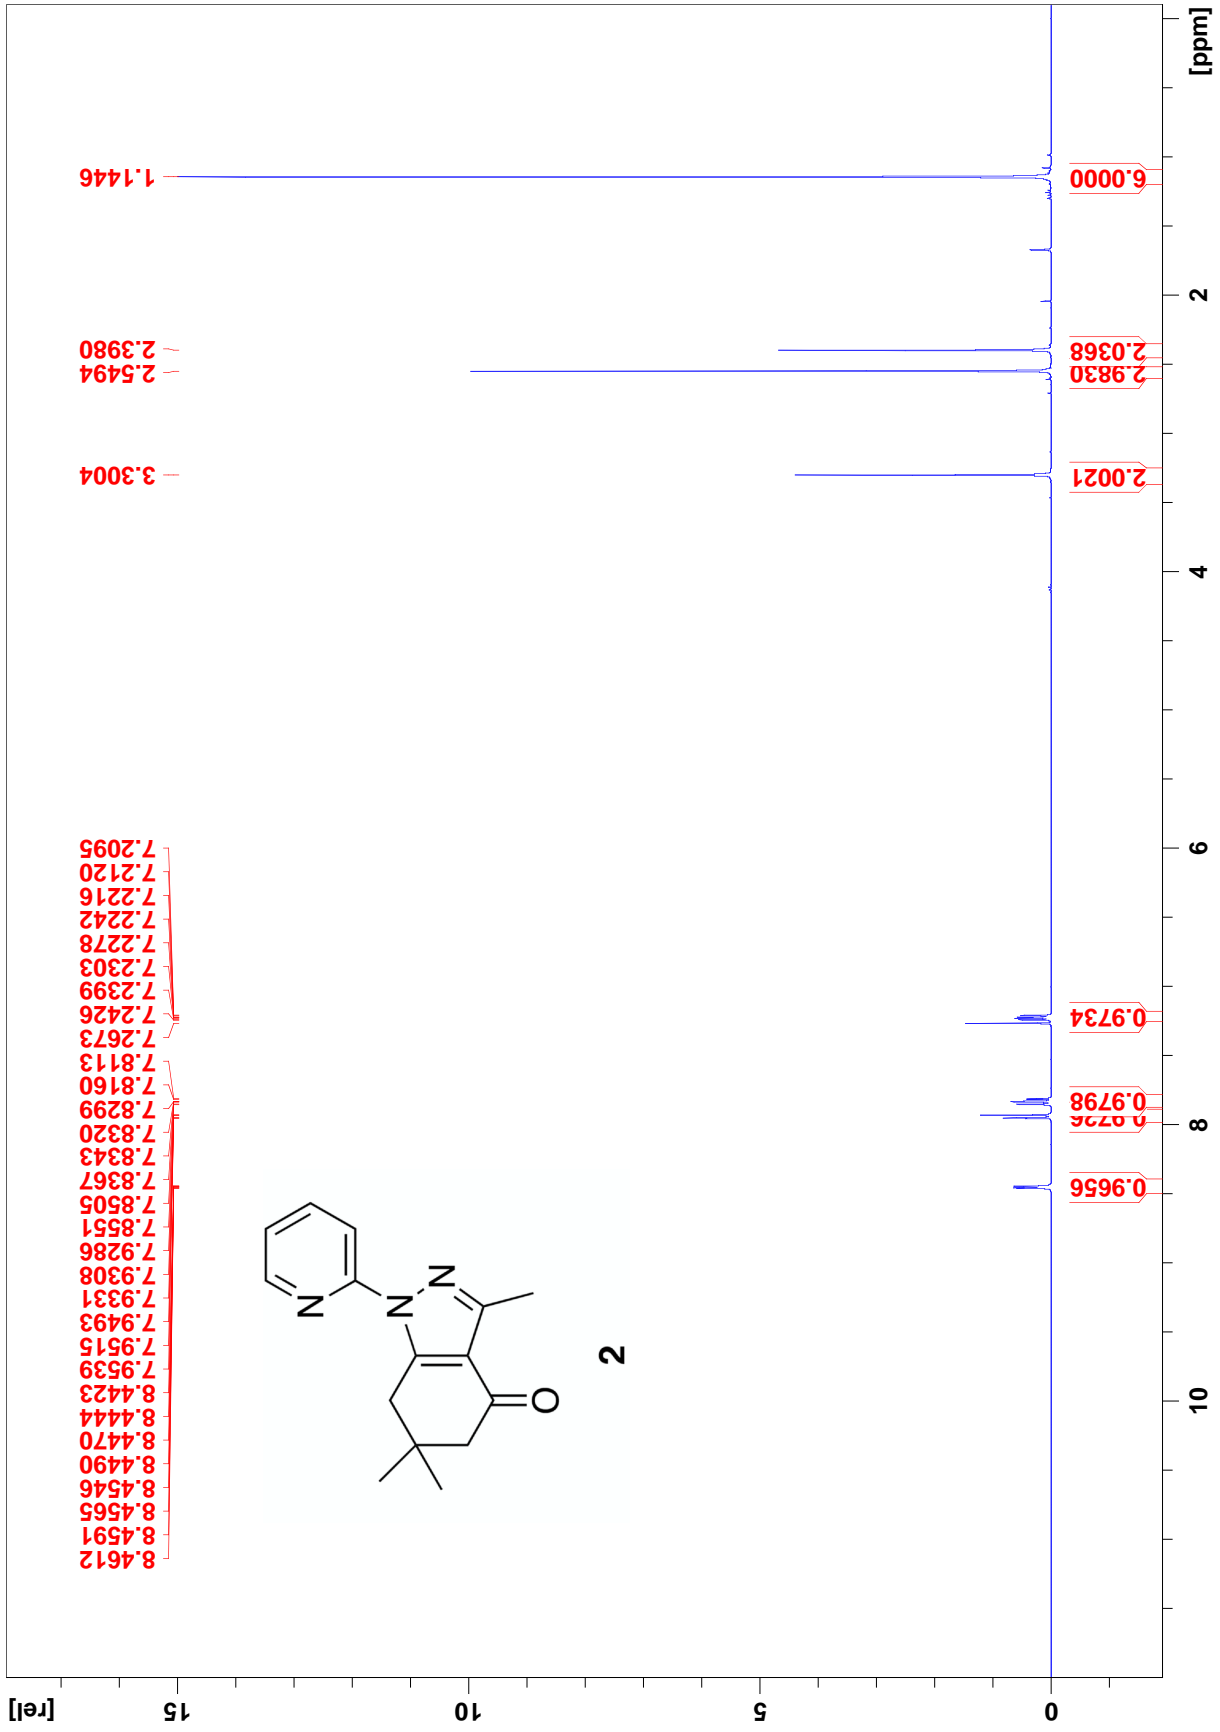

# 13C-NMR

JL-040408 3 1 C:\Bruker\TOPSPIN leex3451

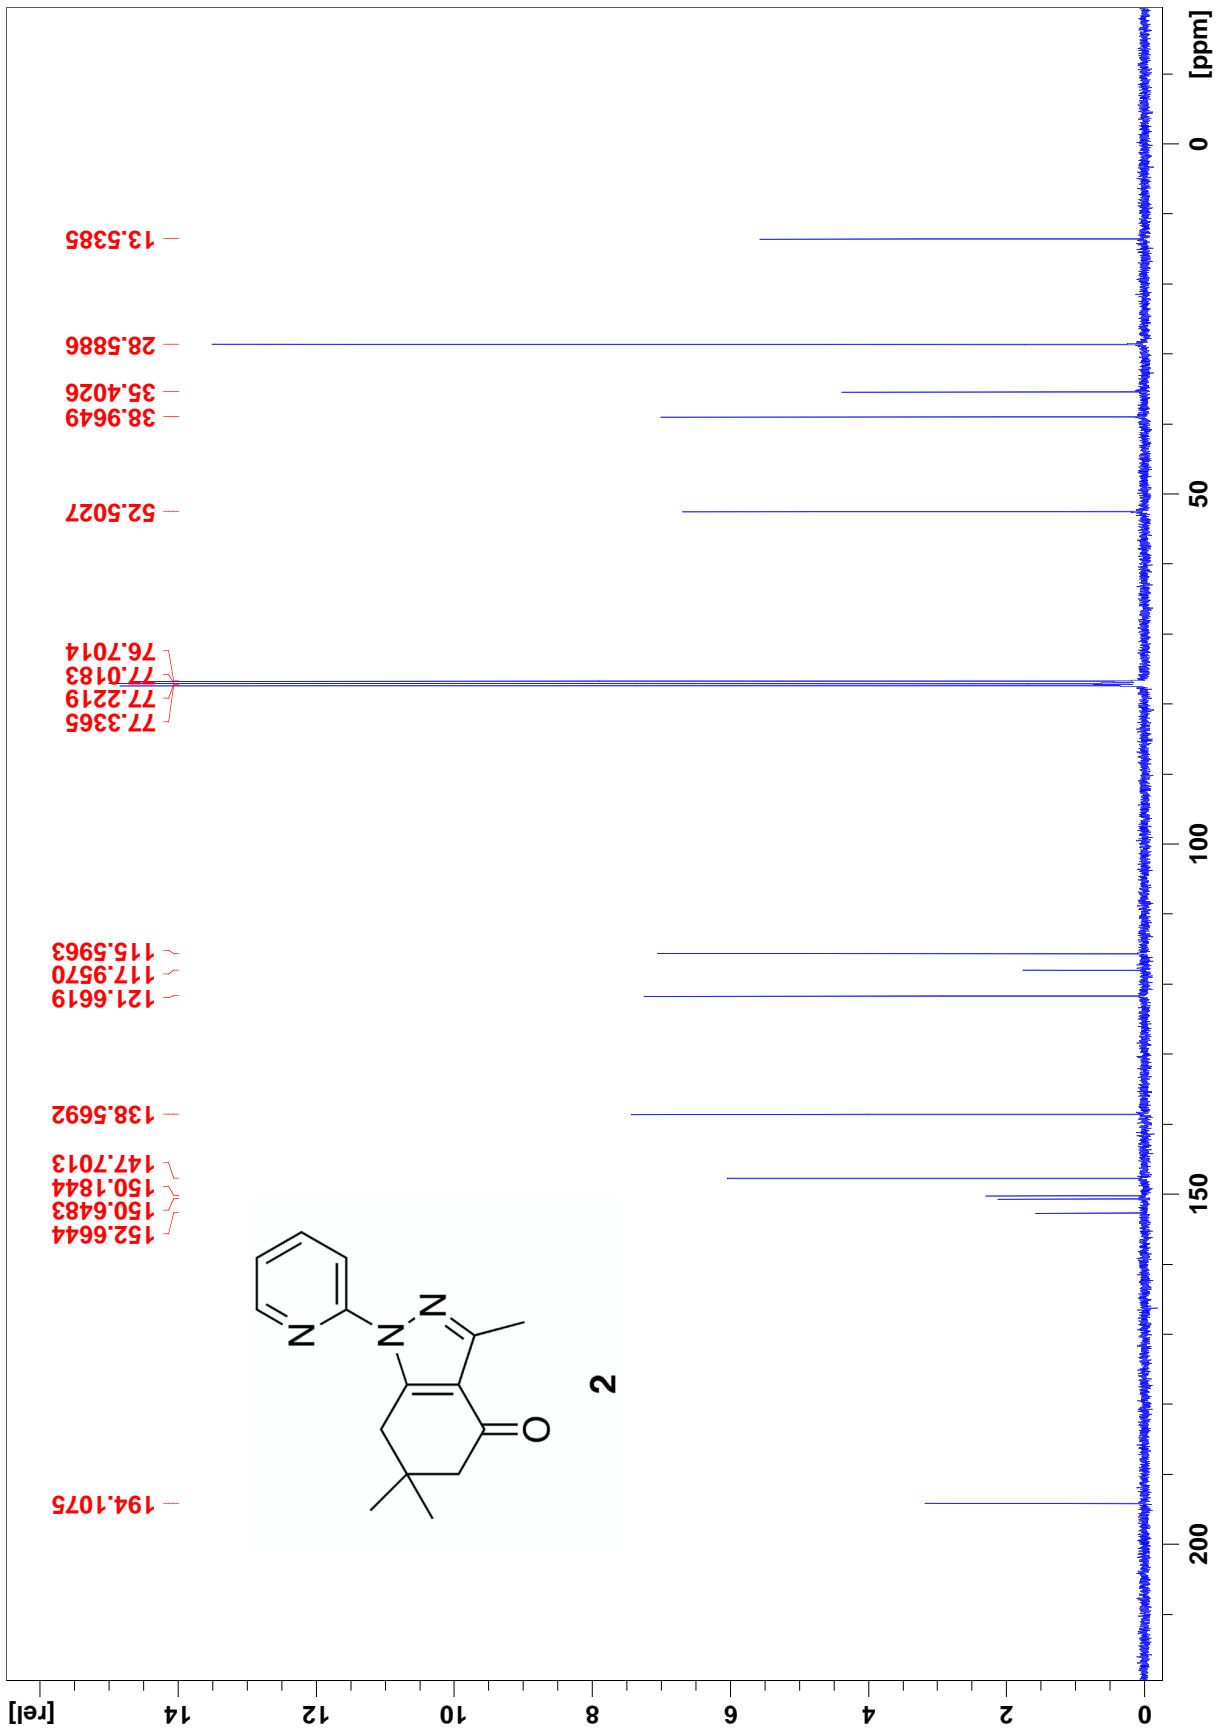

# 1H-NMR

JL-041108-Fr-B 1 1 C:\Bruker\TOPSPIN leex3451

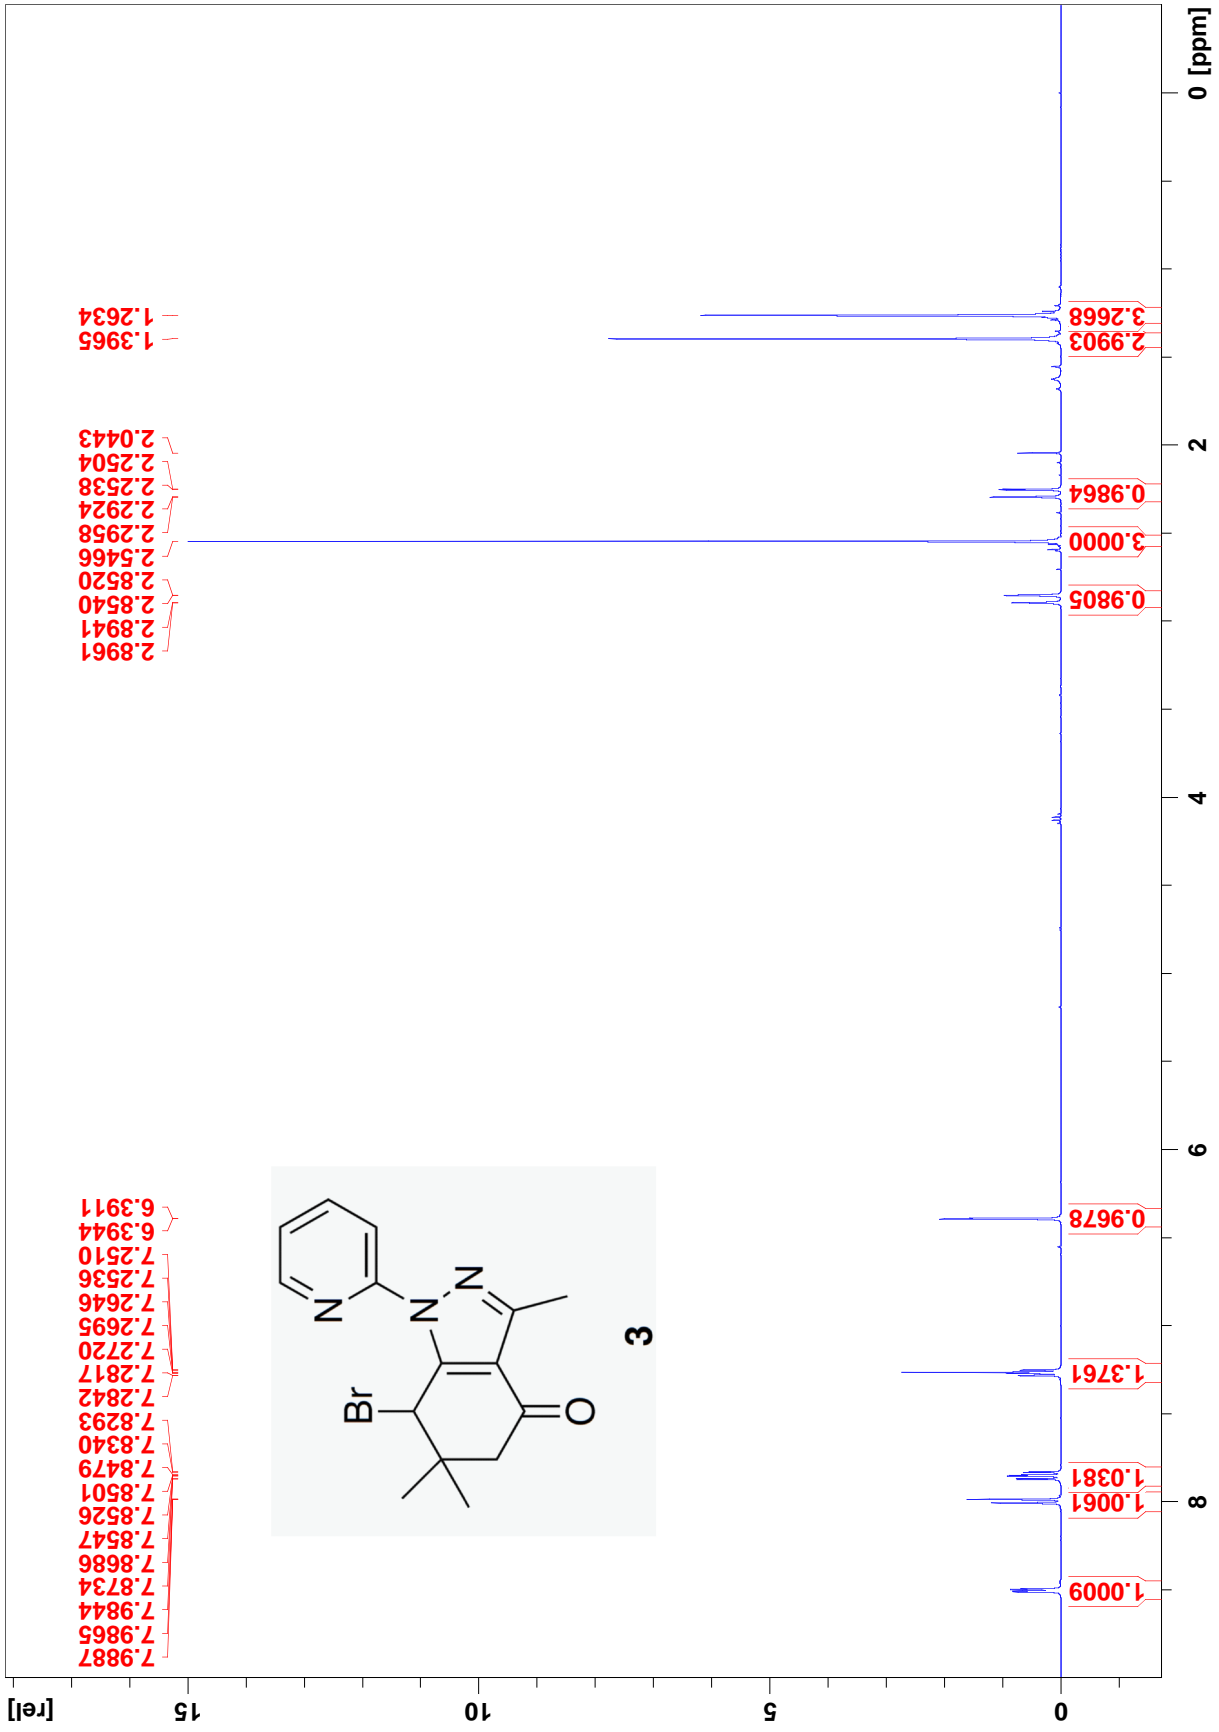



# 13C-NMR

JL-041108-Fr-B 3 1 C:\Bruker\TOPSPIN leex3451

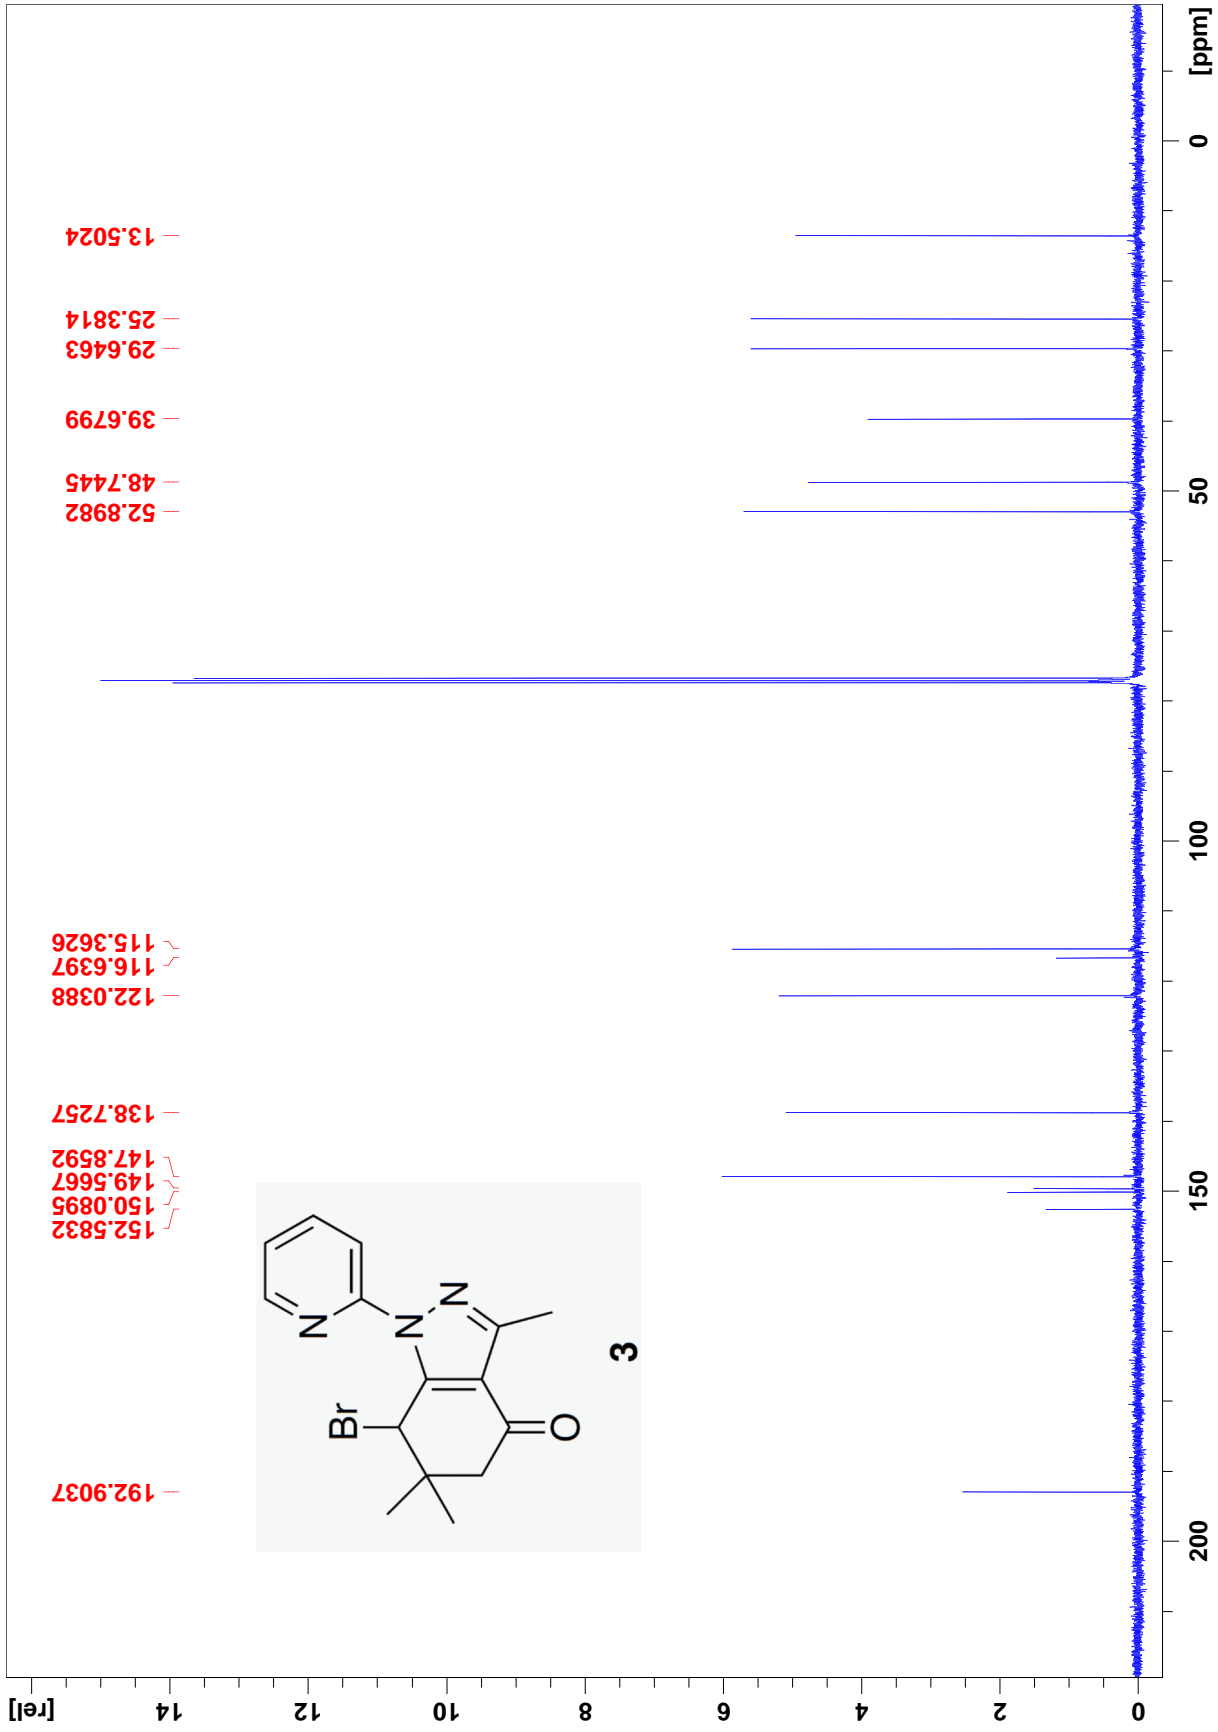

# 1H-NMR

JL08-060508 1 1 C:\Bruker\TOPSPIN leex3451

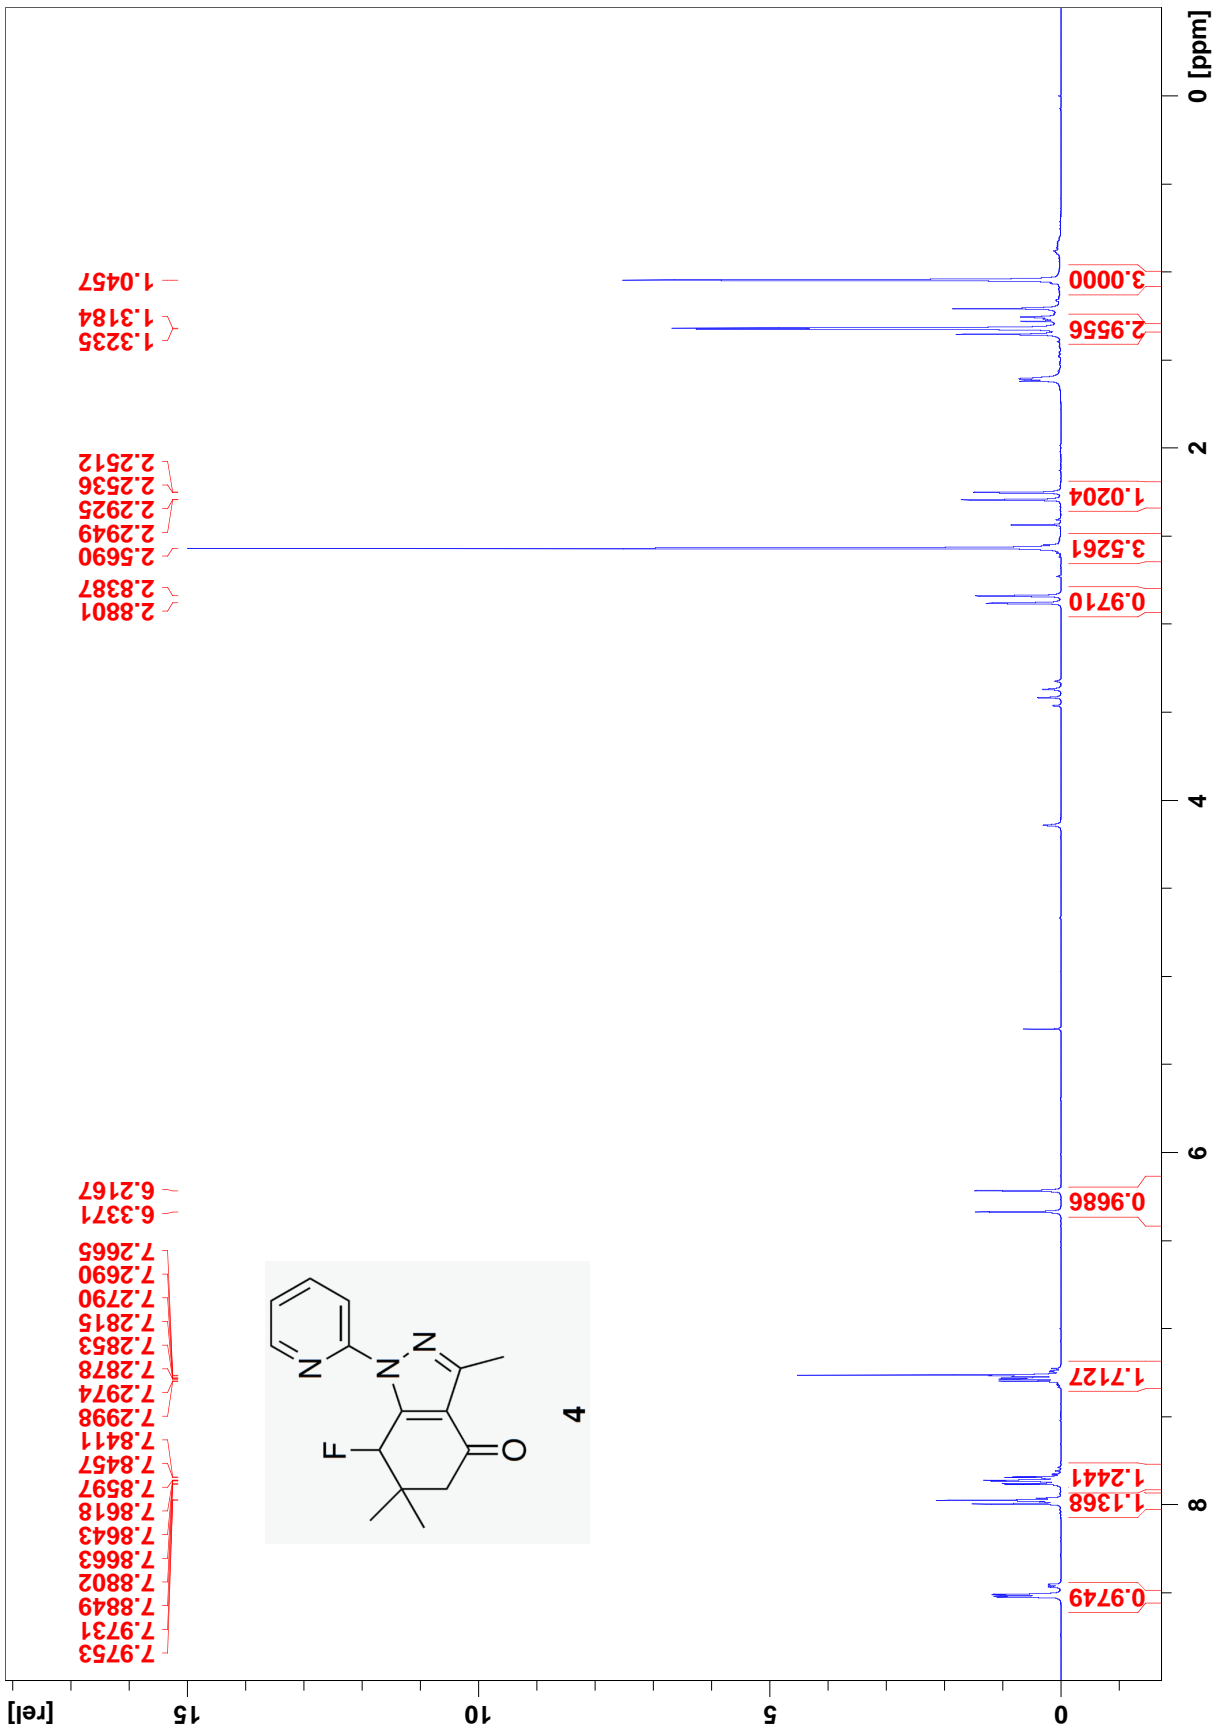

# 13C-NMR

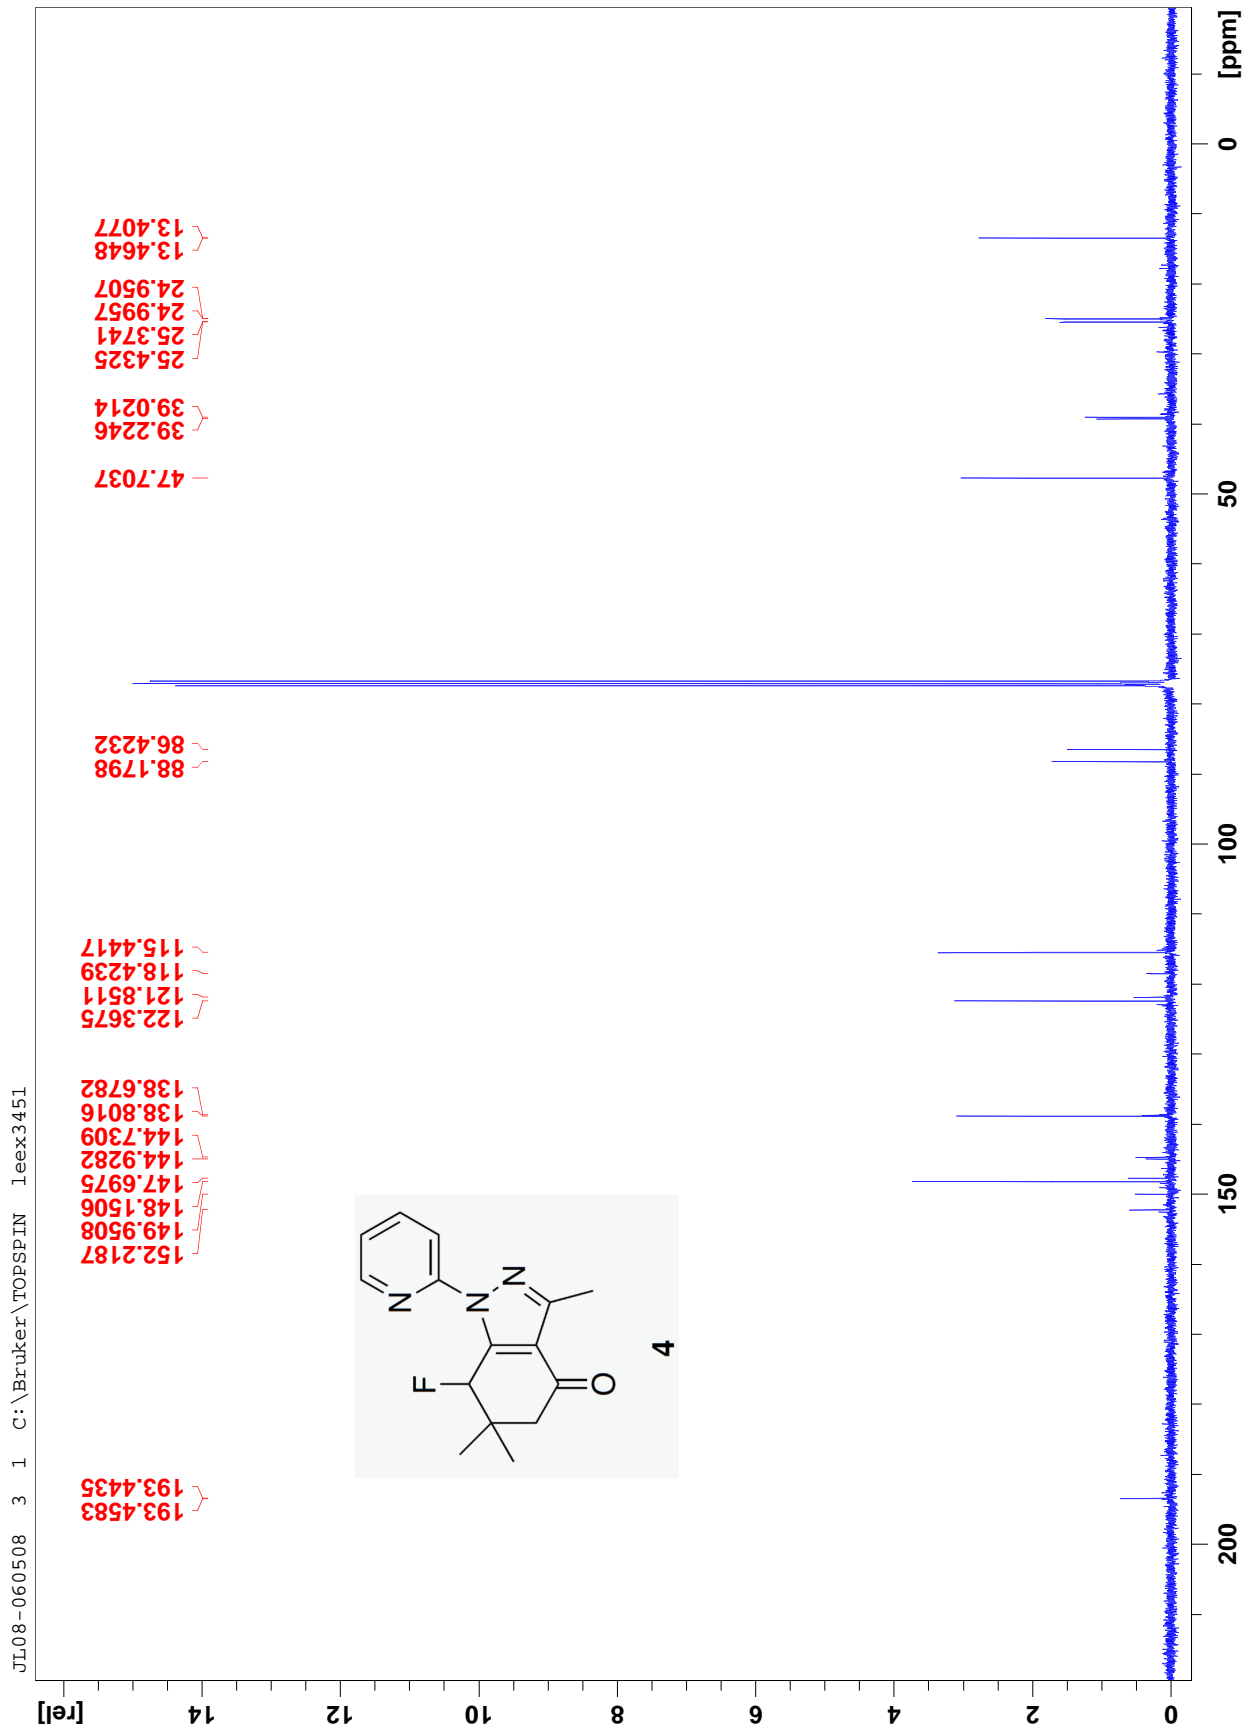

# 1H-NMR

JL08-052908B 1 1 C:\Bruker\TOPSPIN leex3451

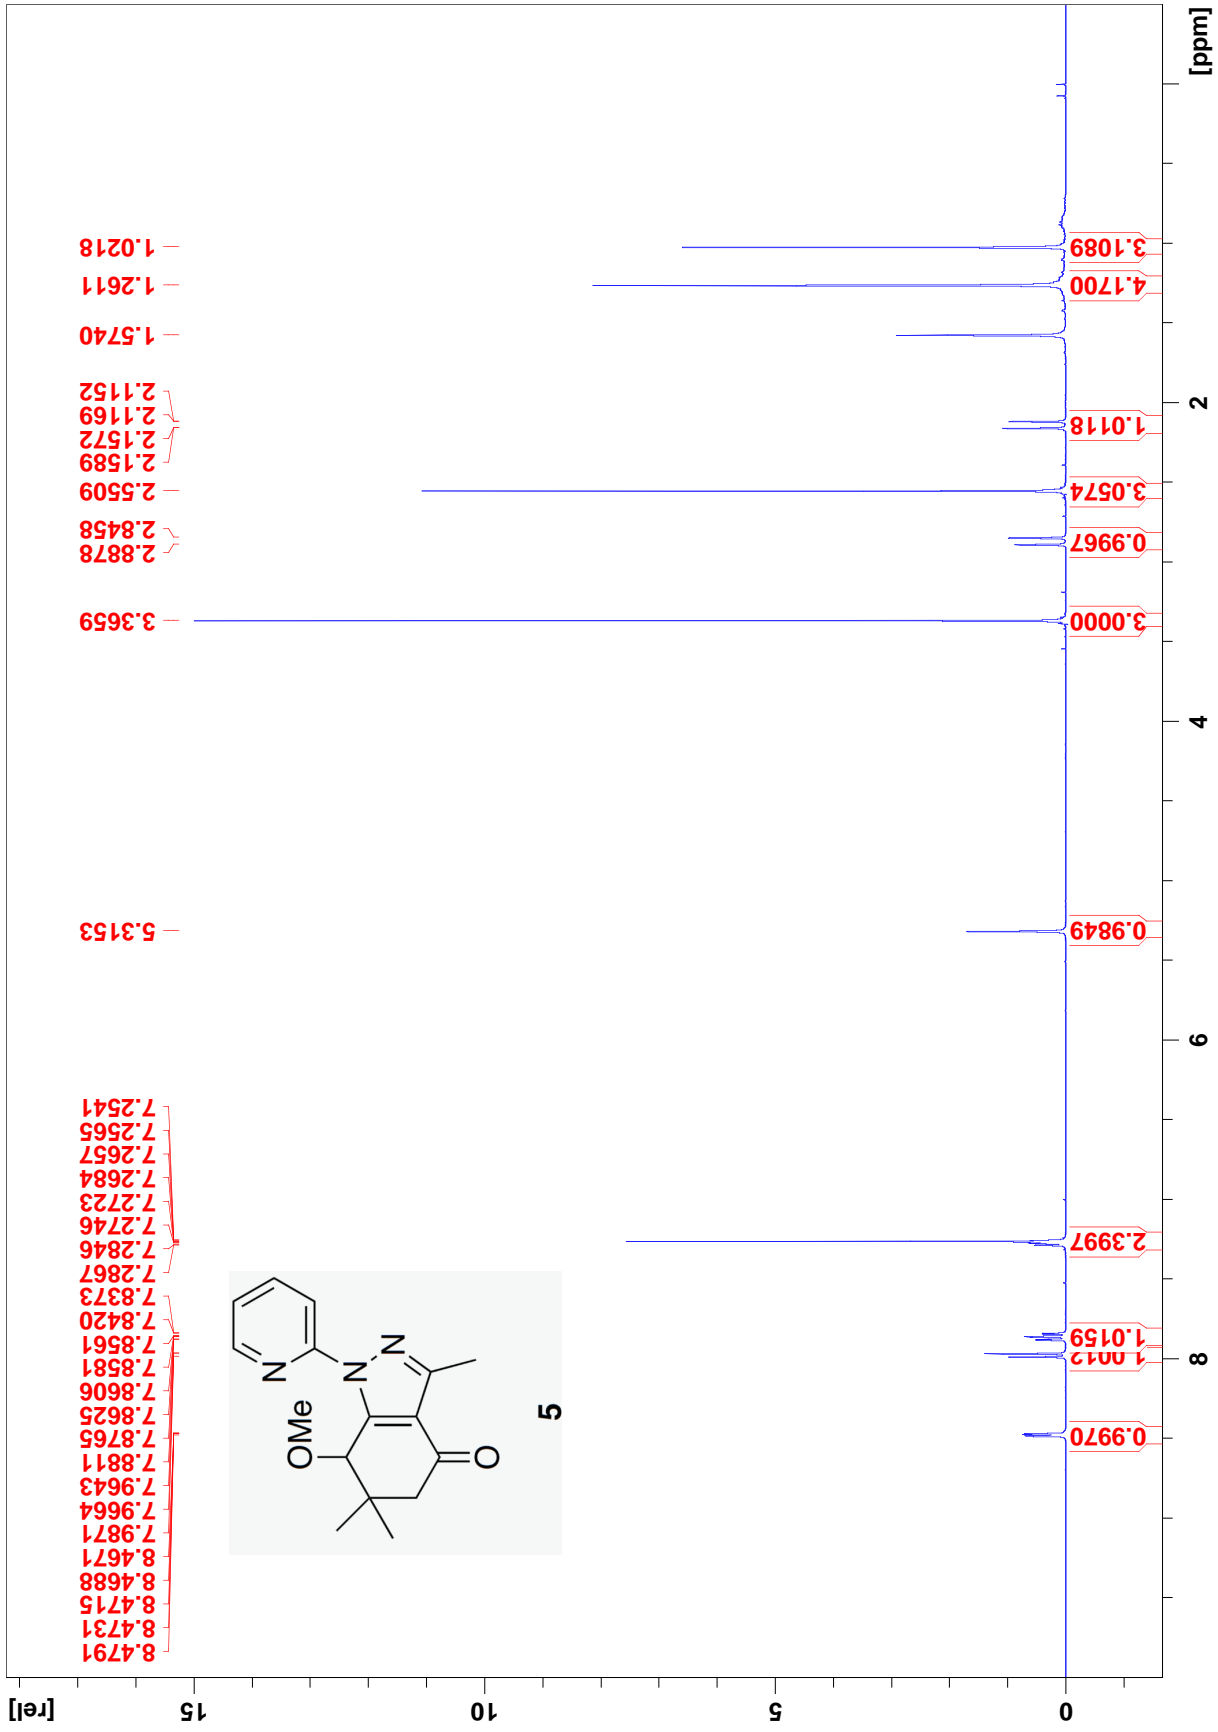

# 13C-NMR

JL08-052908B 3 1 C:\Bruker\TOPSPIN leex3451

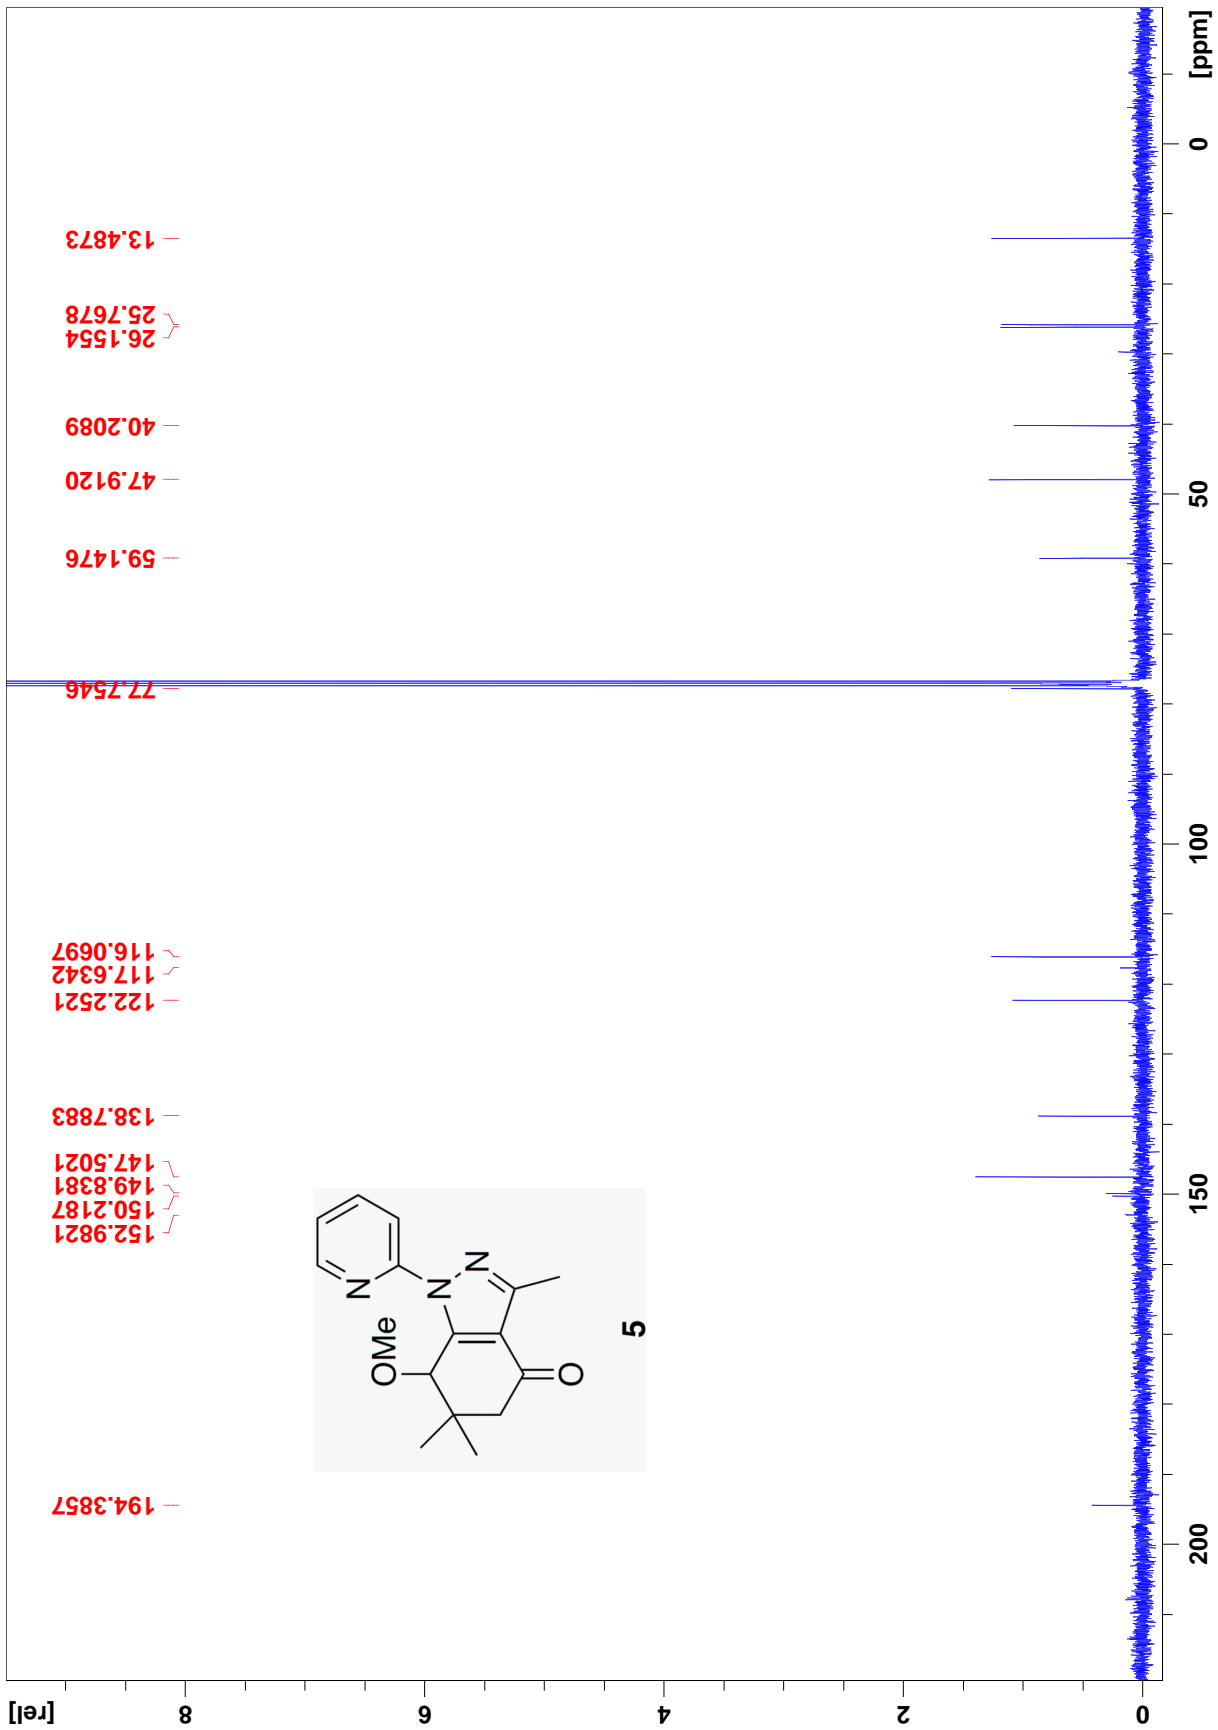

# 1H-NMR

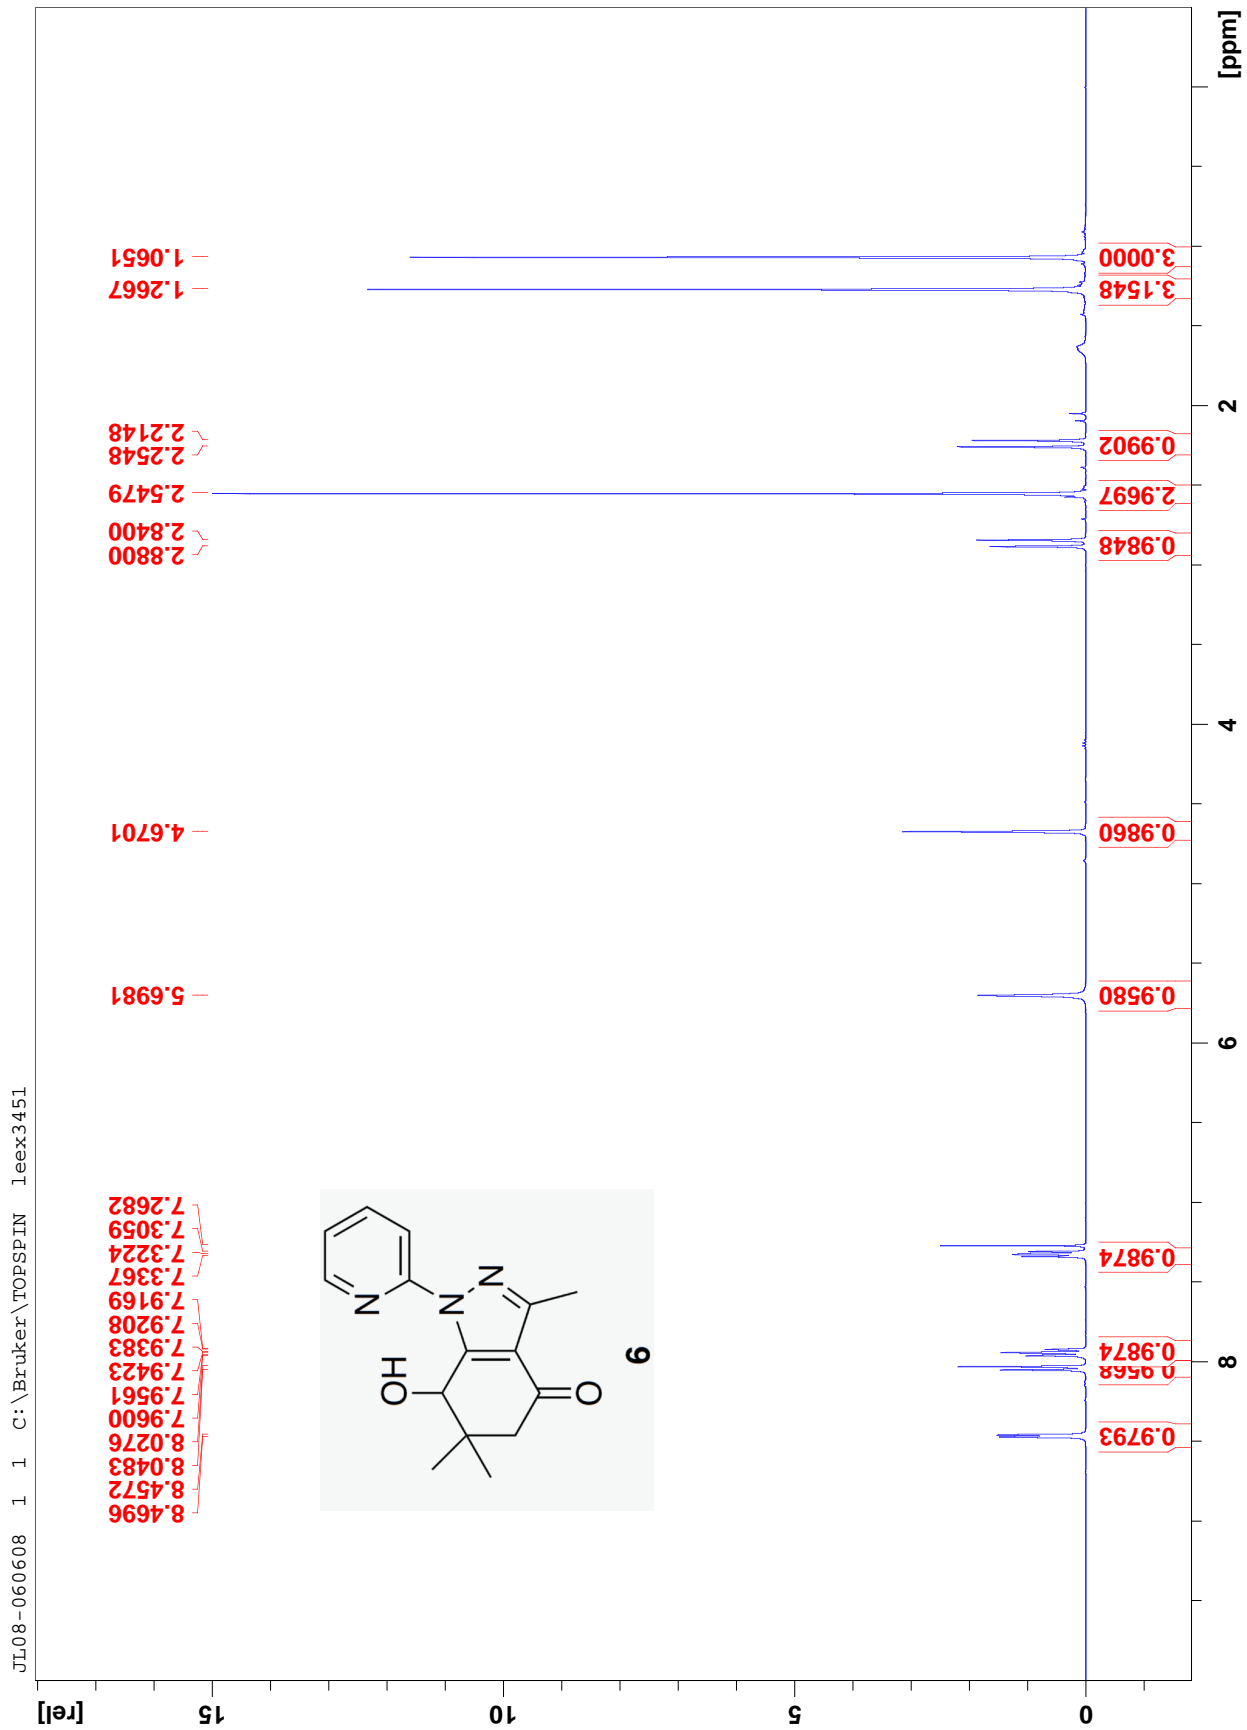

# 13C-NMR

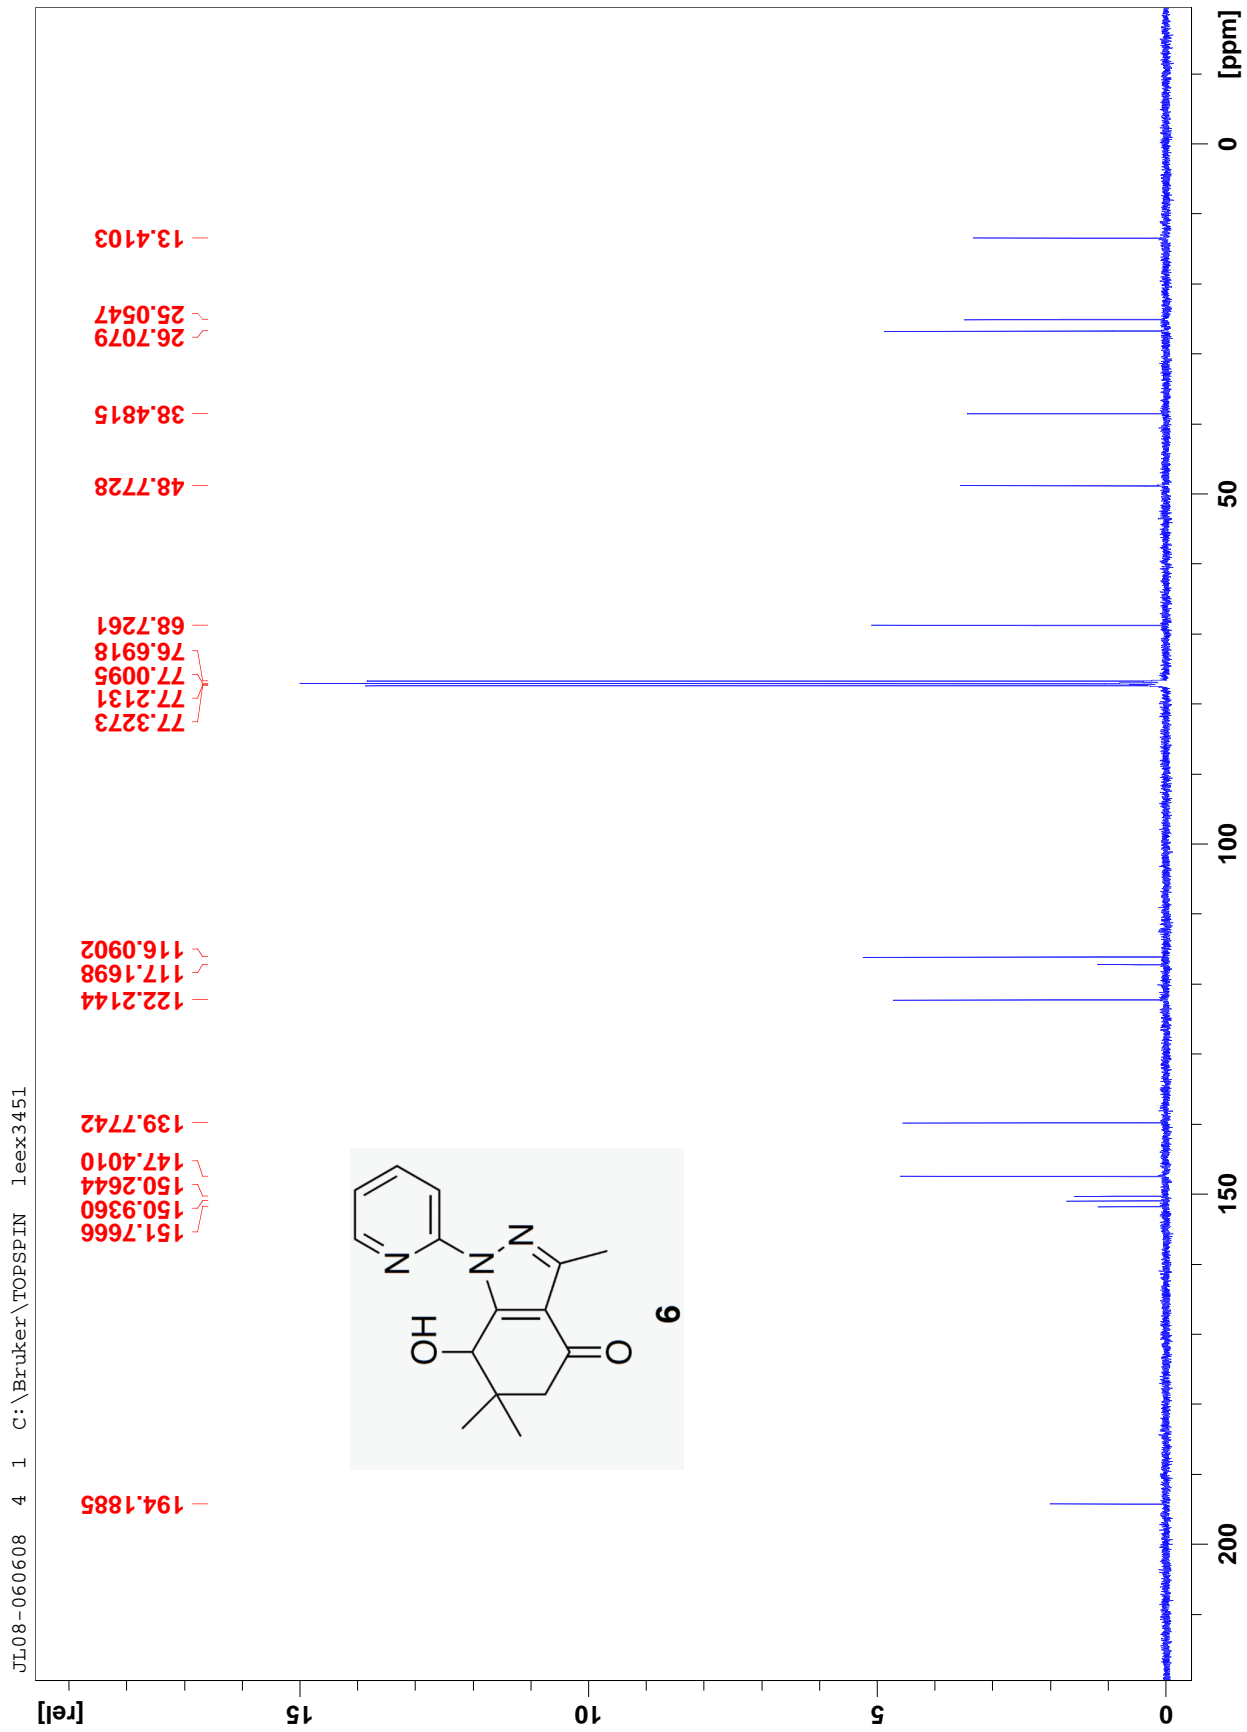

# 1H-NMR

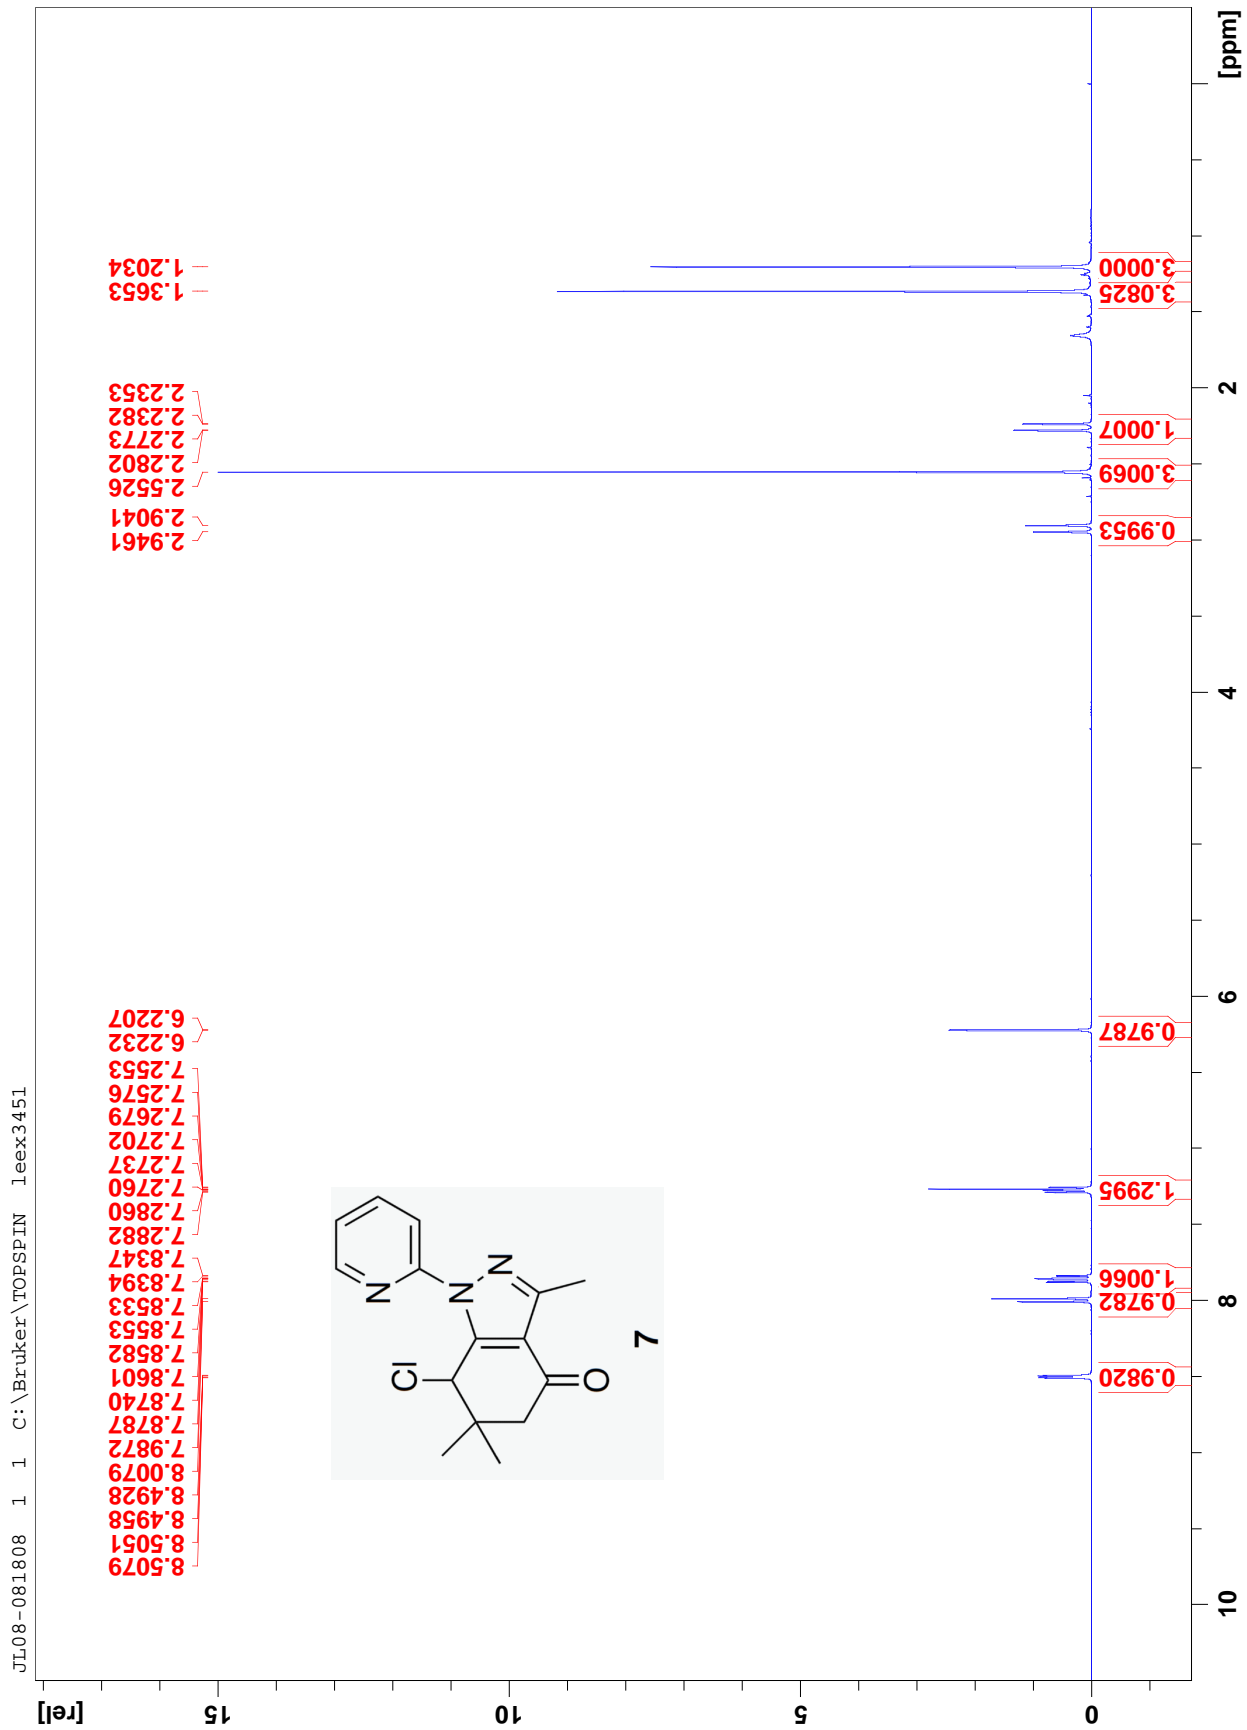



# 13C-NMR

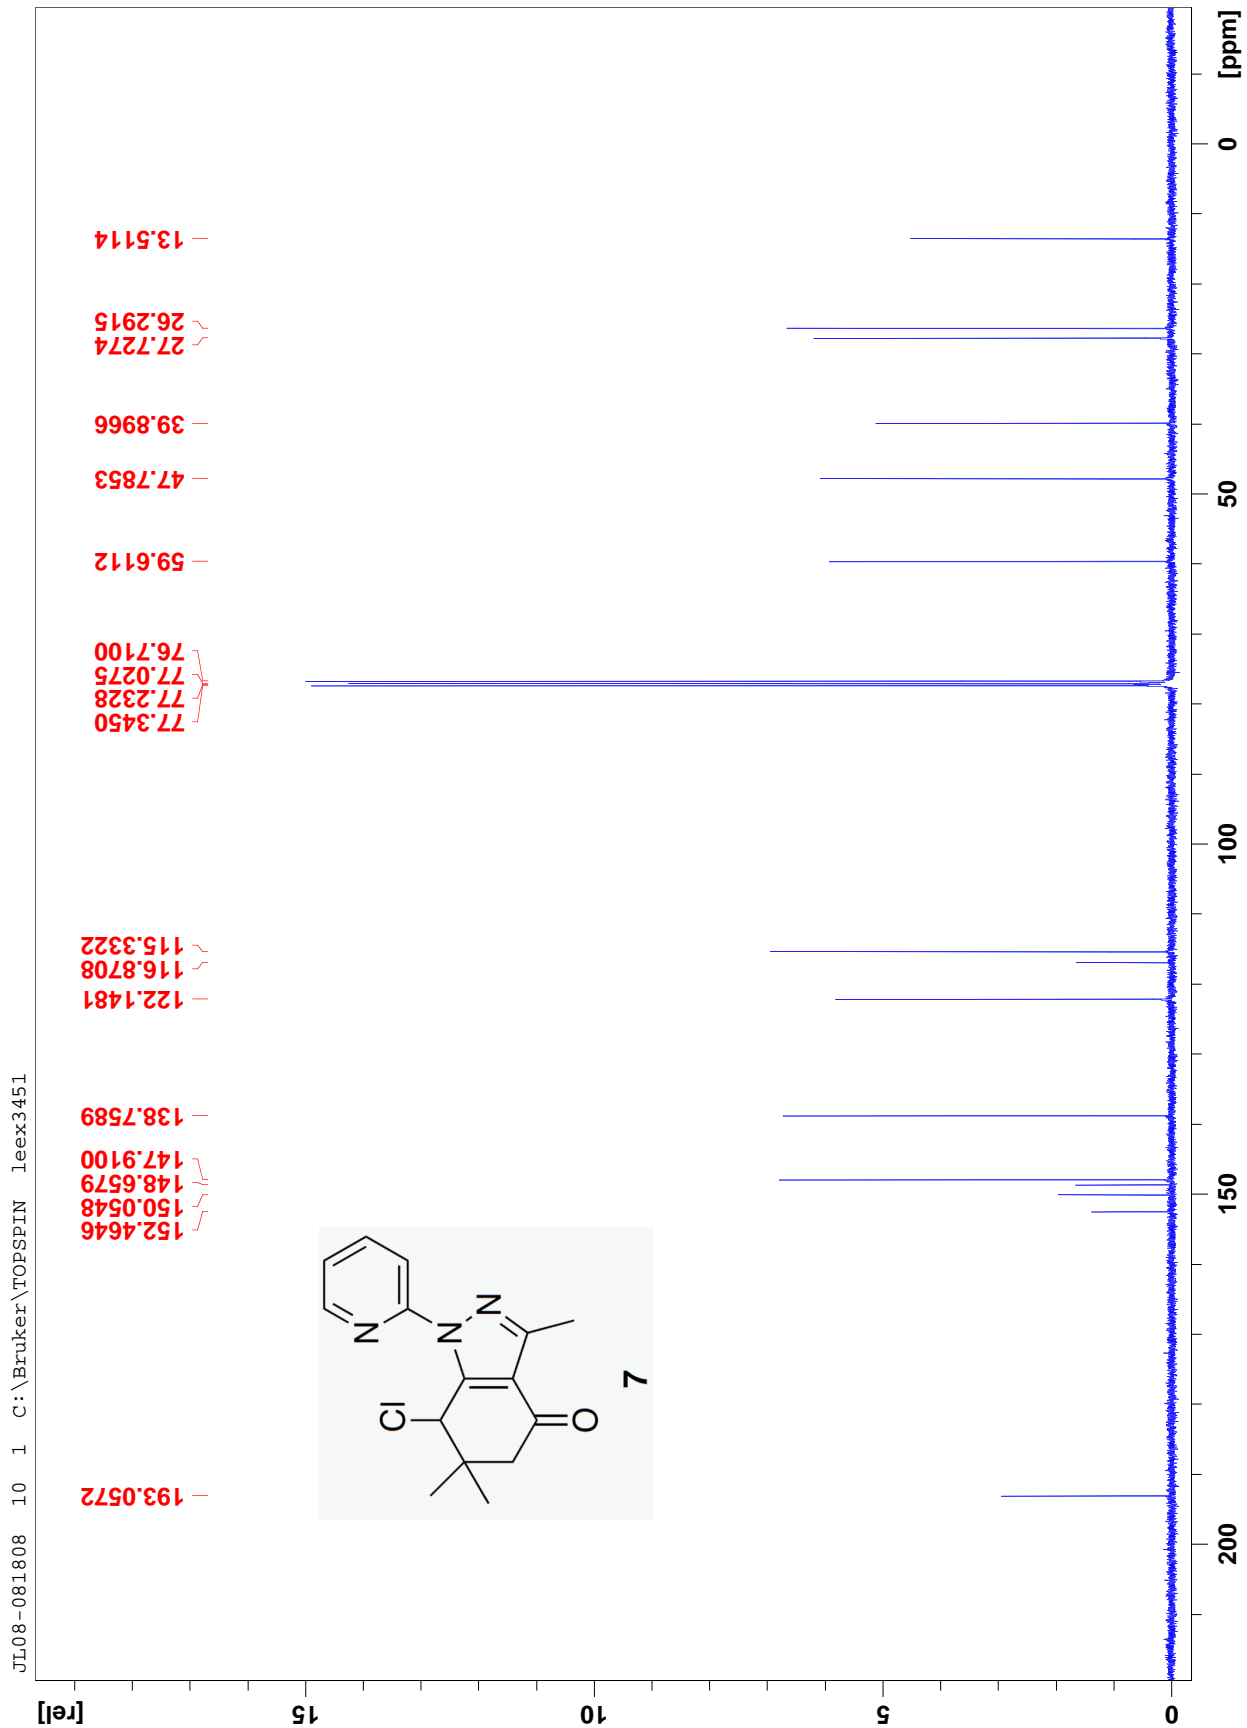

# 1H-NMR

JL08-082108A 1 1 C:\Bruker\TOPSPIN leex3451

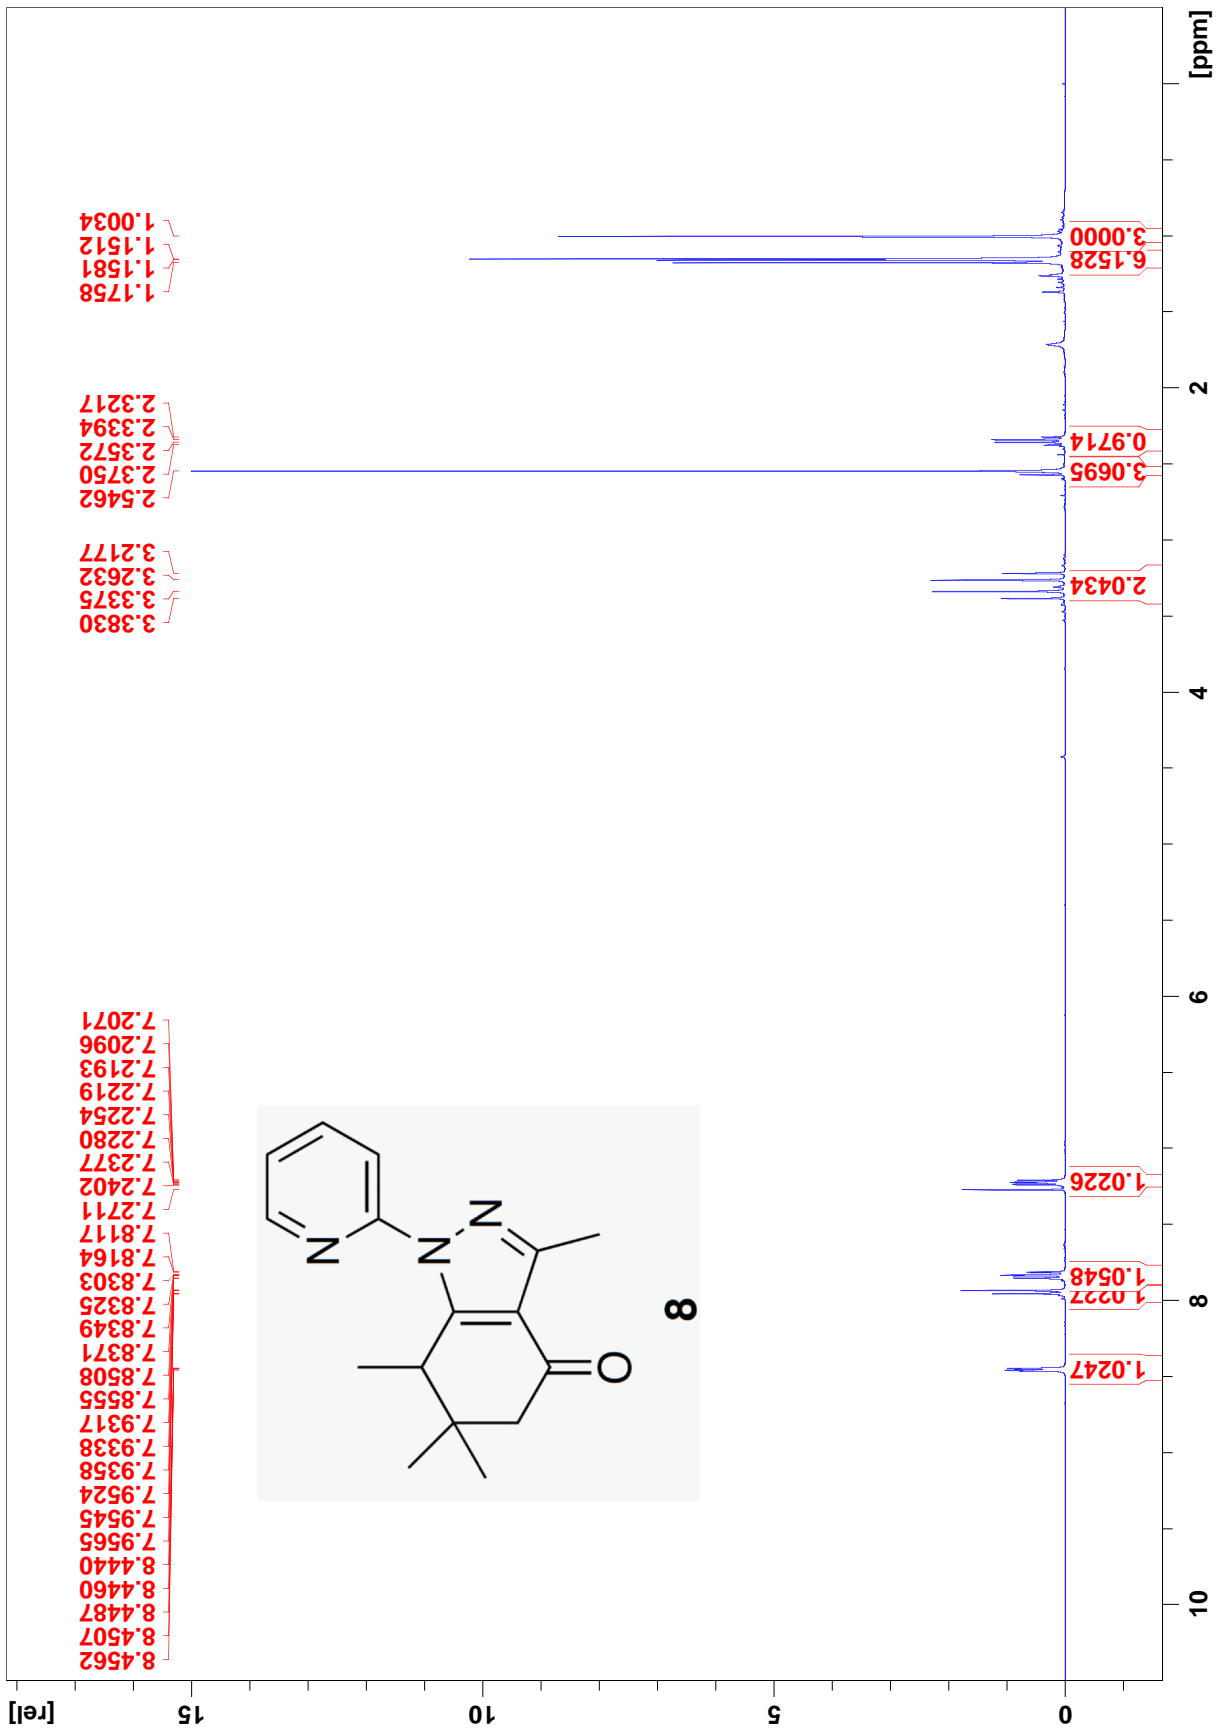

# 13C-NMR

JL08-082108A 3 1 C:\Bruker\TOPSPIN leex3451

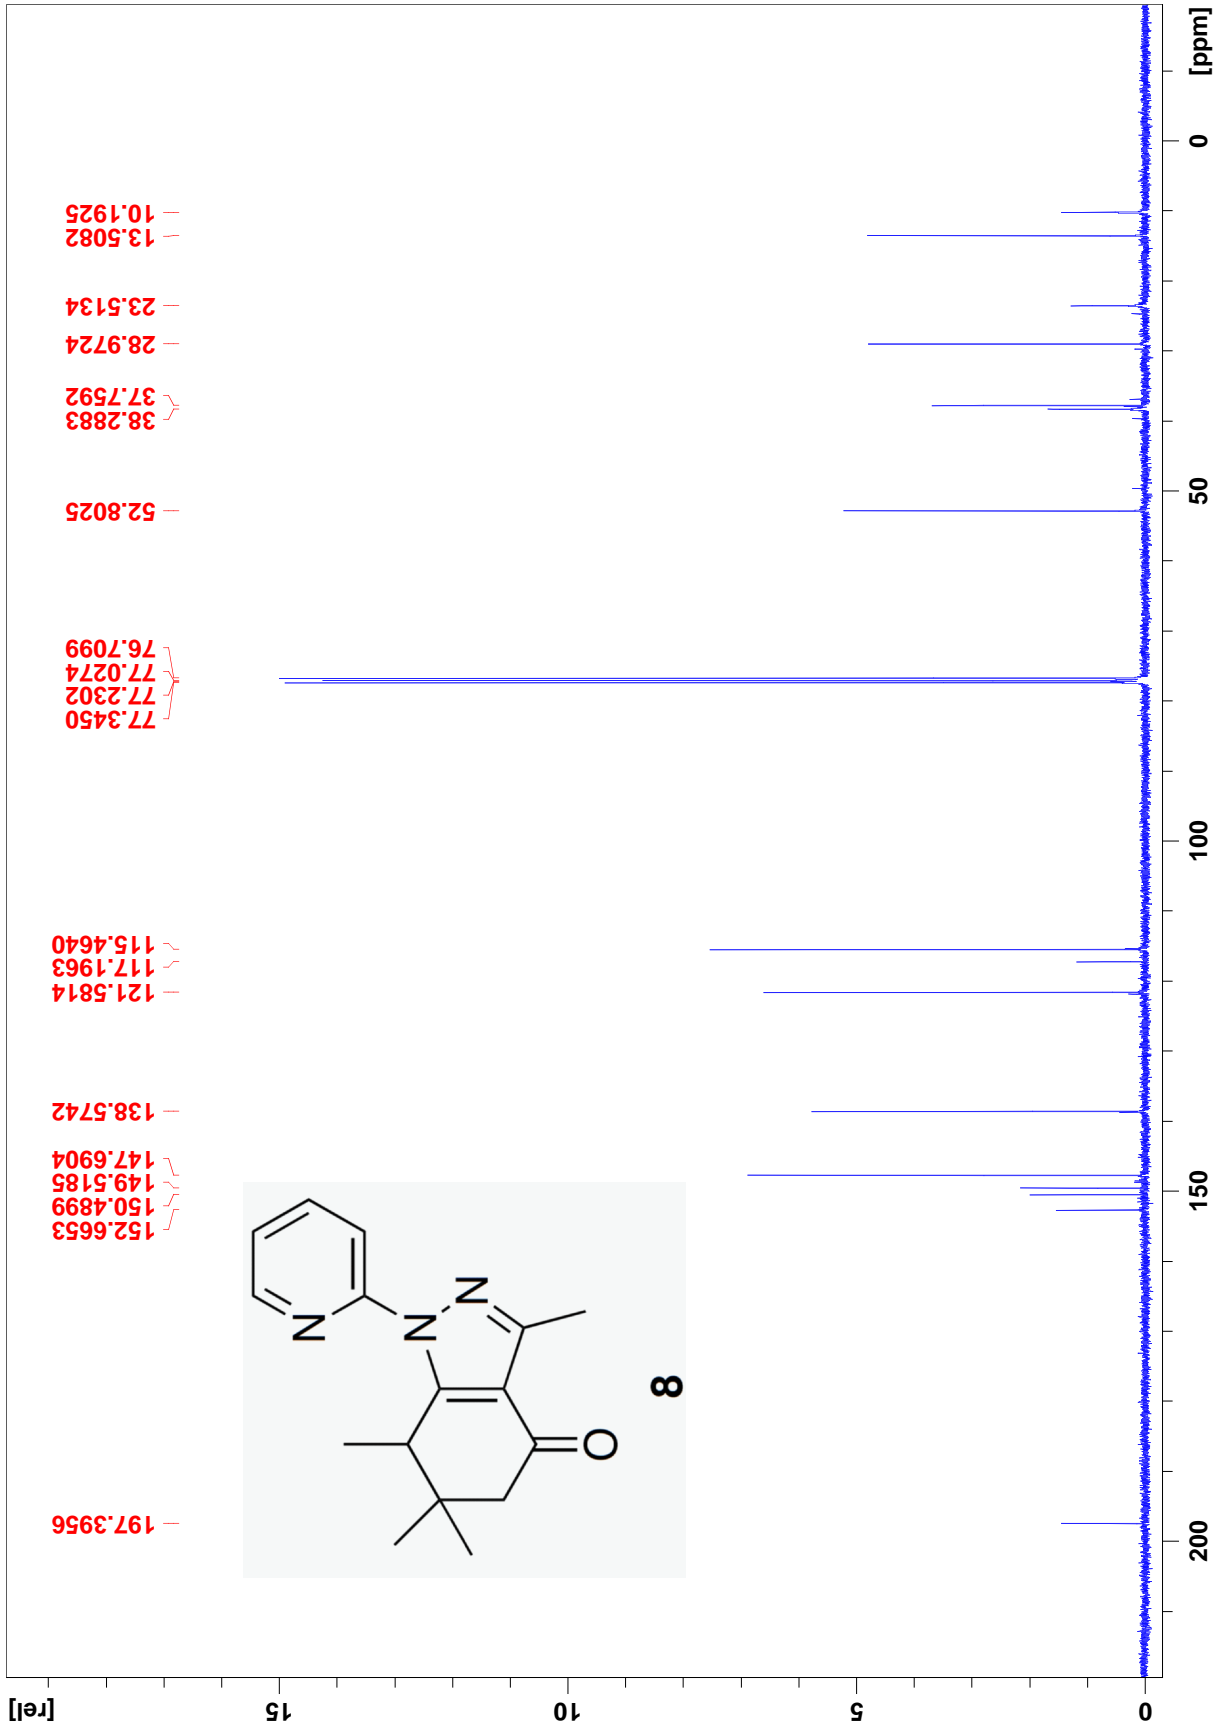

# 1H-NMR

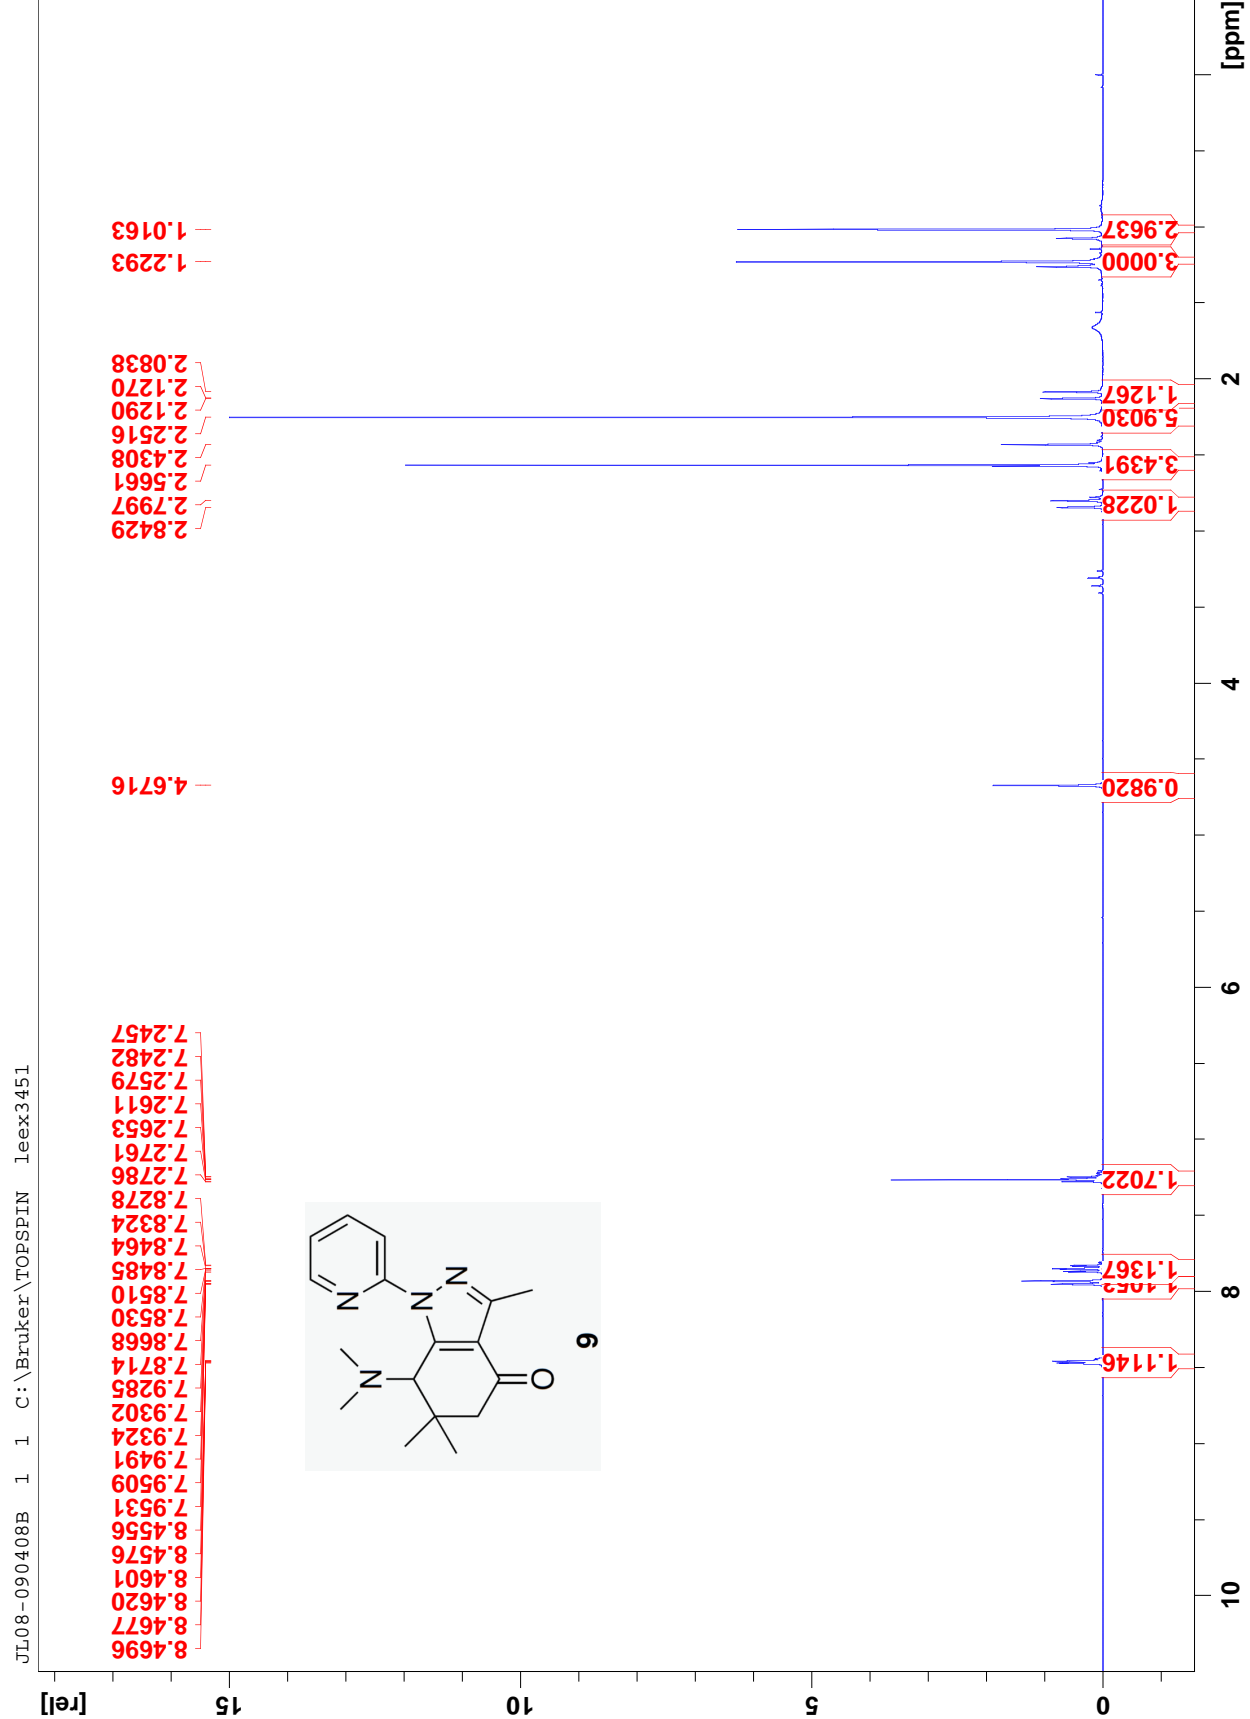

# 13C-NMR

JL08-090408B 3 1 C:\Bruker\TOPSPIN leex3451

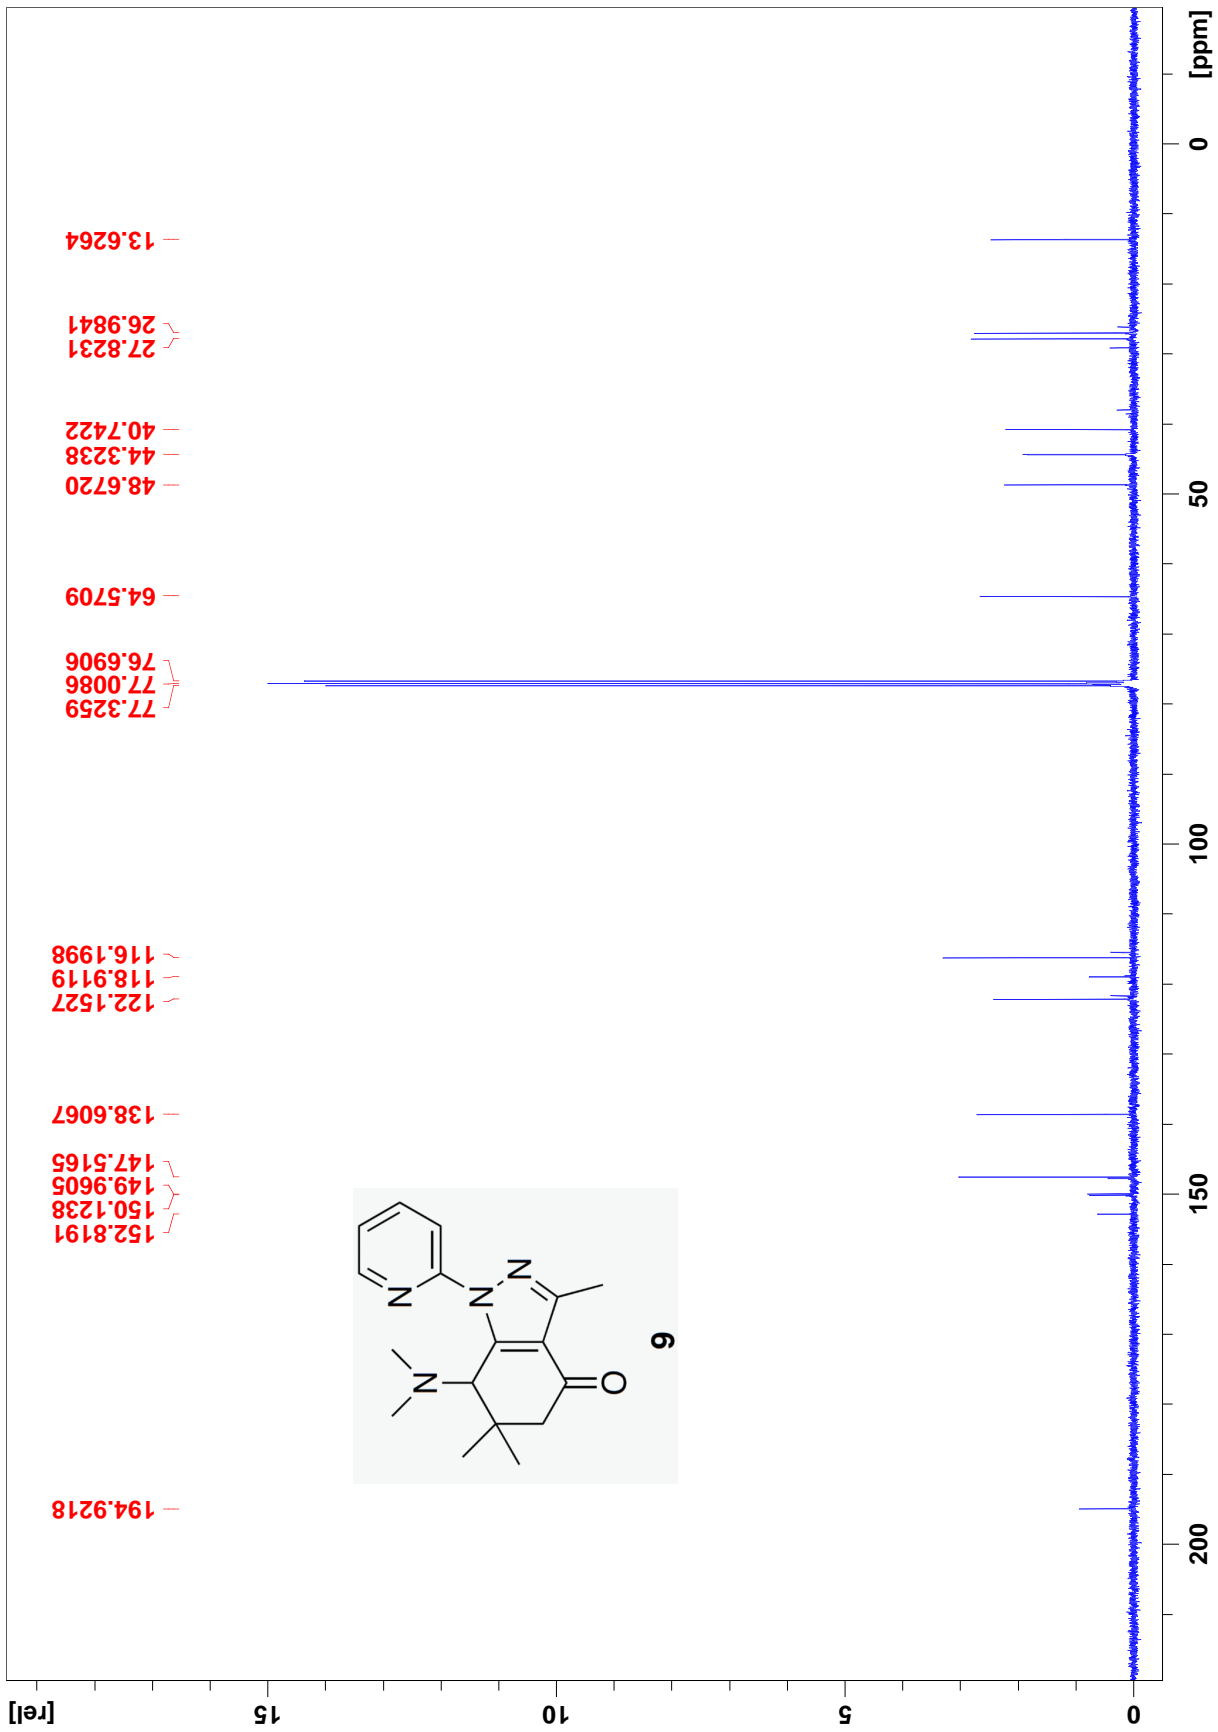

# 1H-NMR

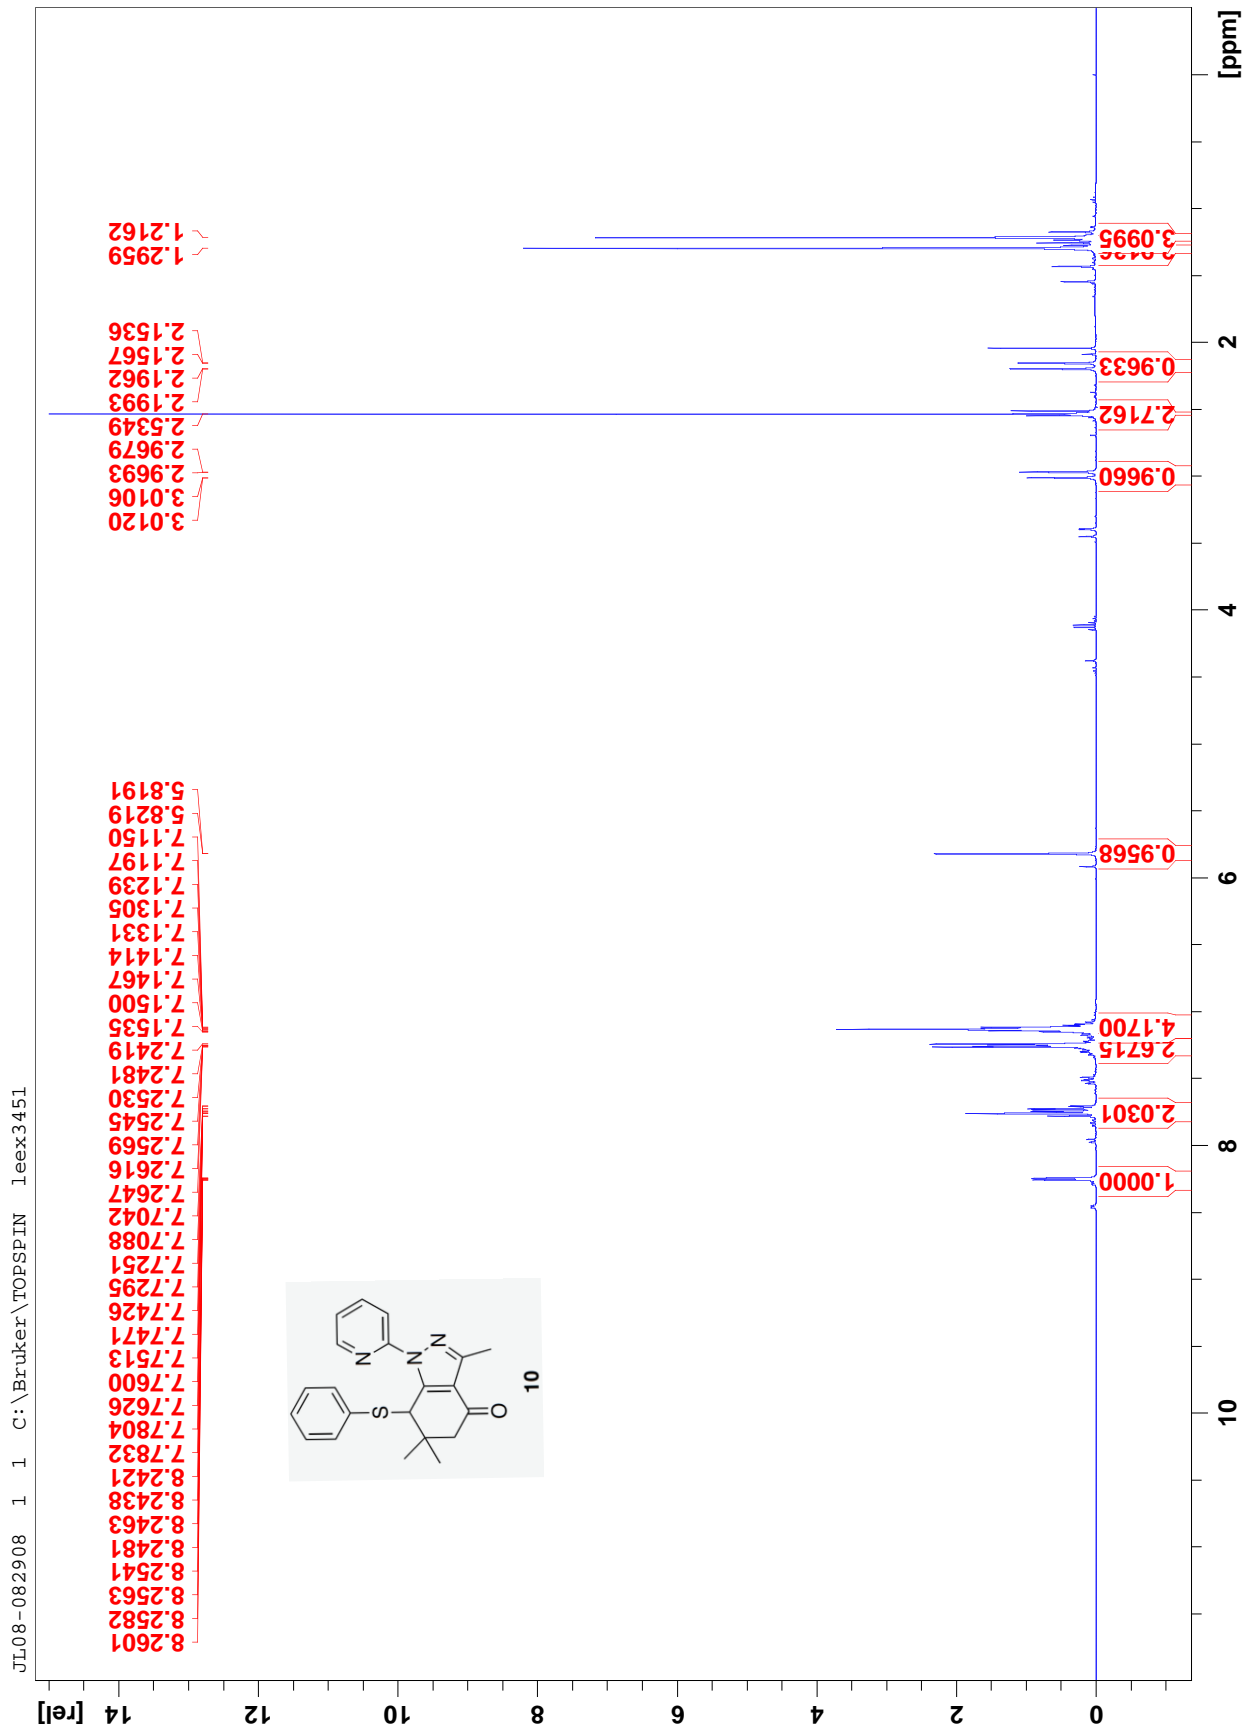

# 13C-NMR

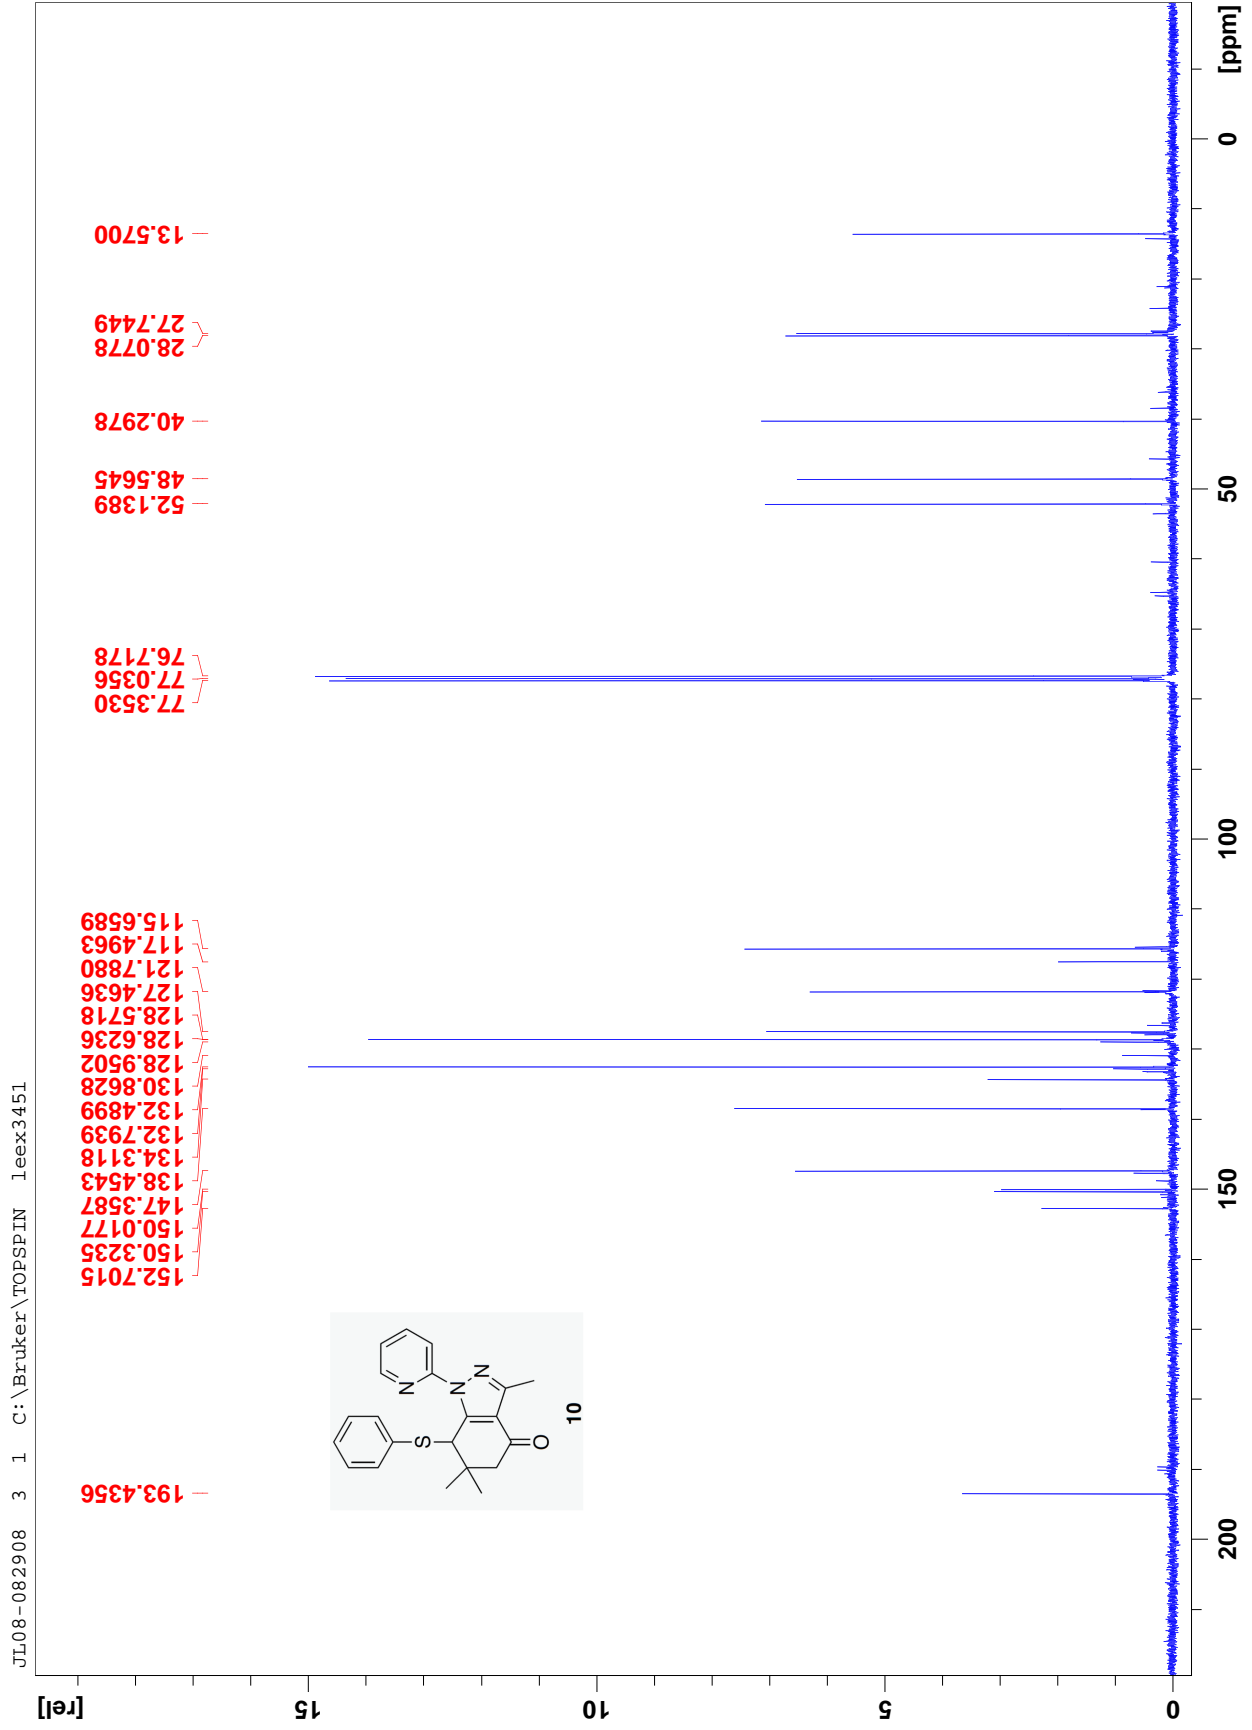

# 1H-NMR

JL08-091008A 1 1 C:\Bruker\TOPSPIN leex3451

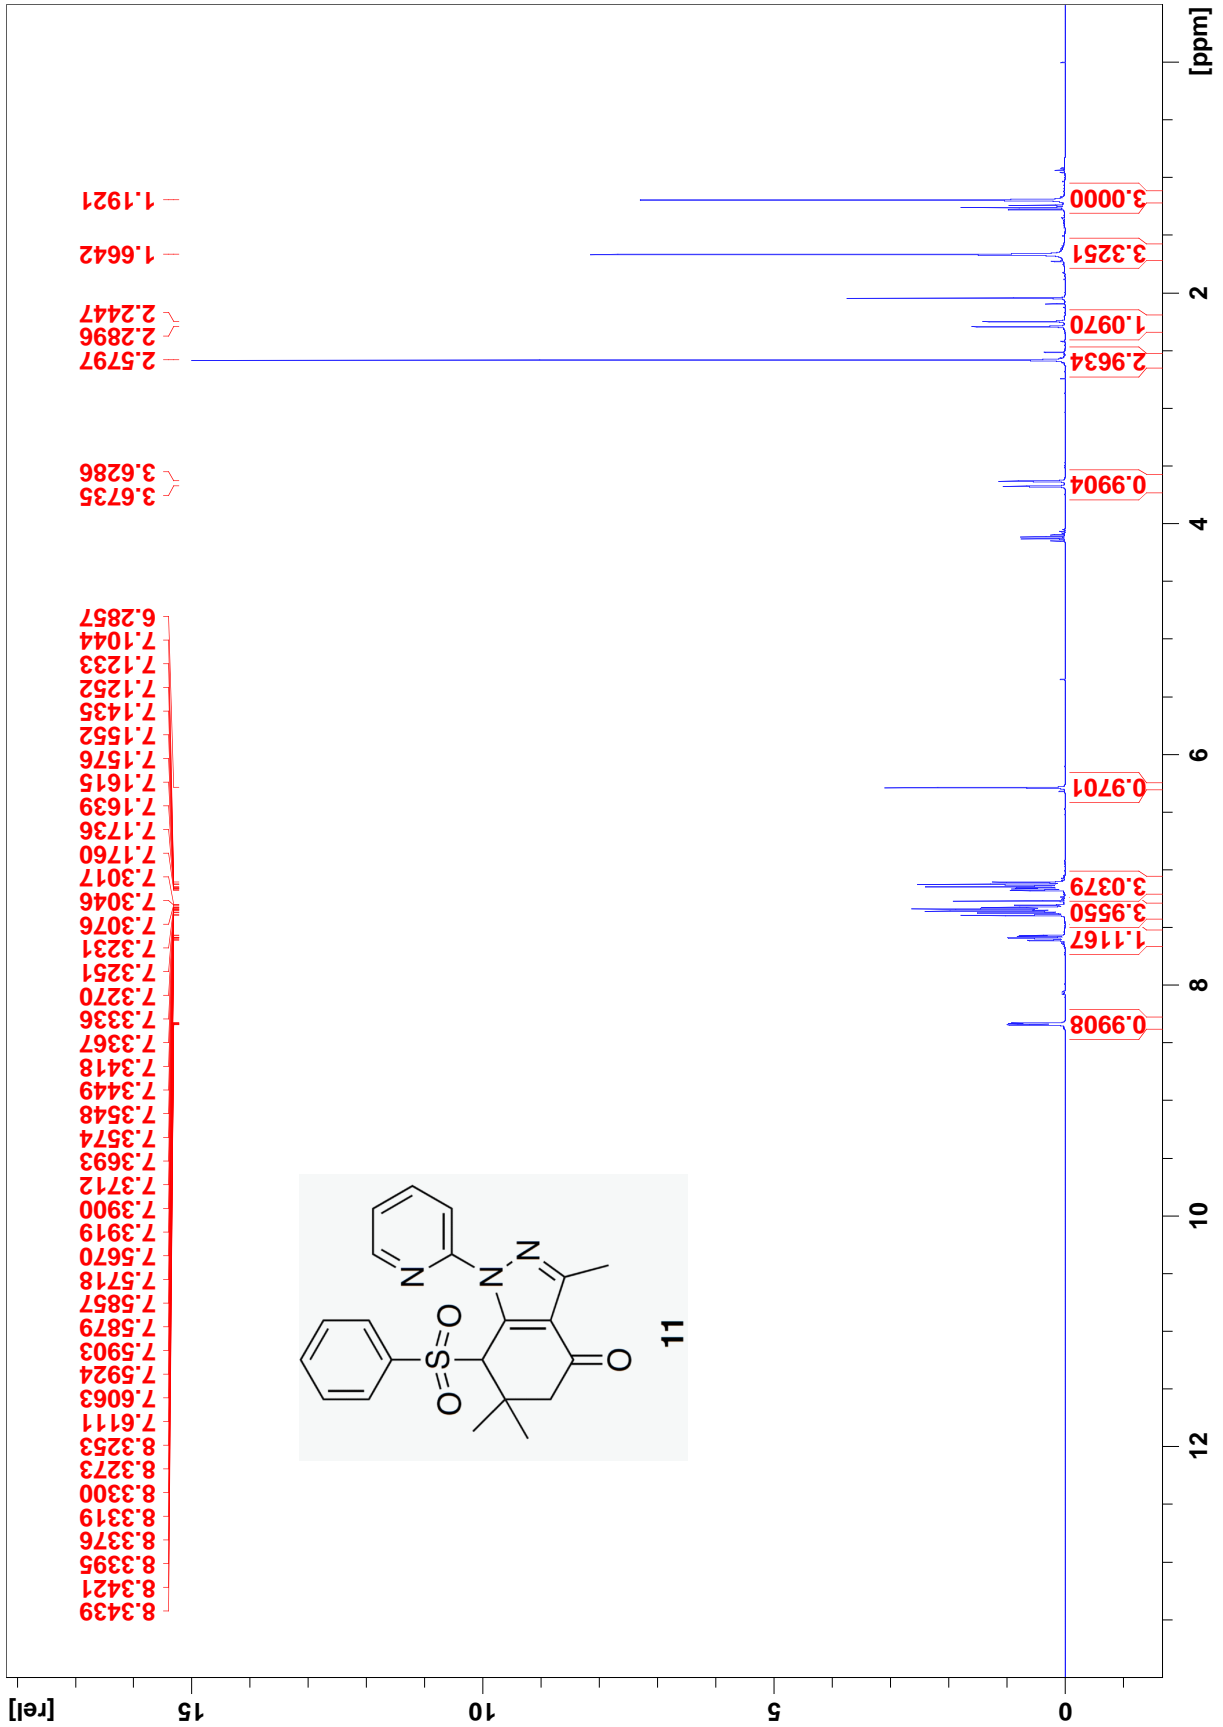



# 13C-NMR

JL08-091008A 3 1 C:\Bruker\TOPSPIN leex3451

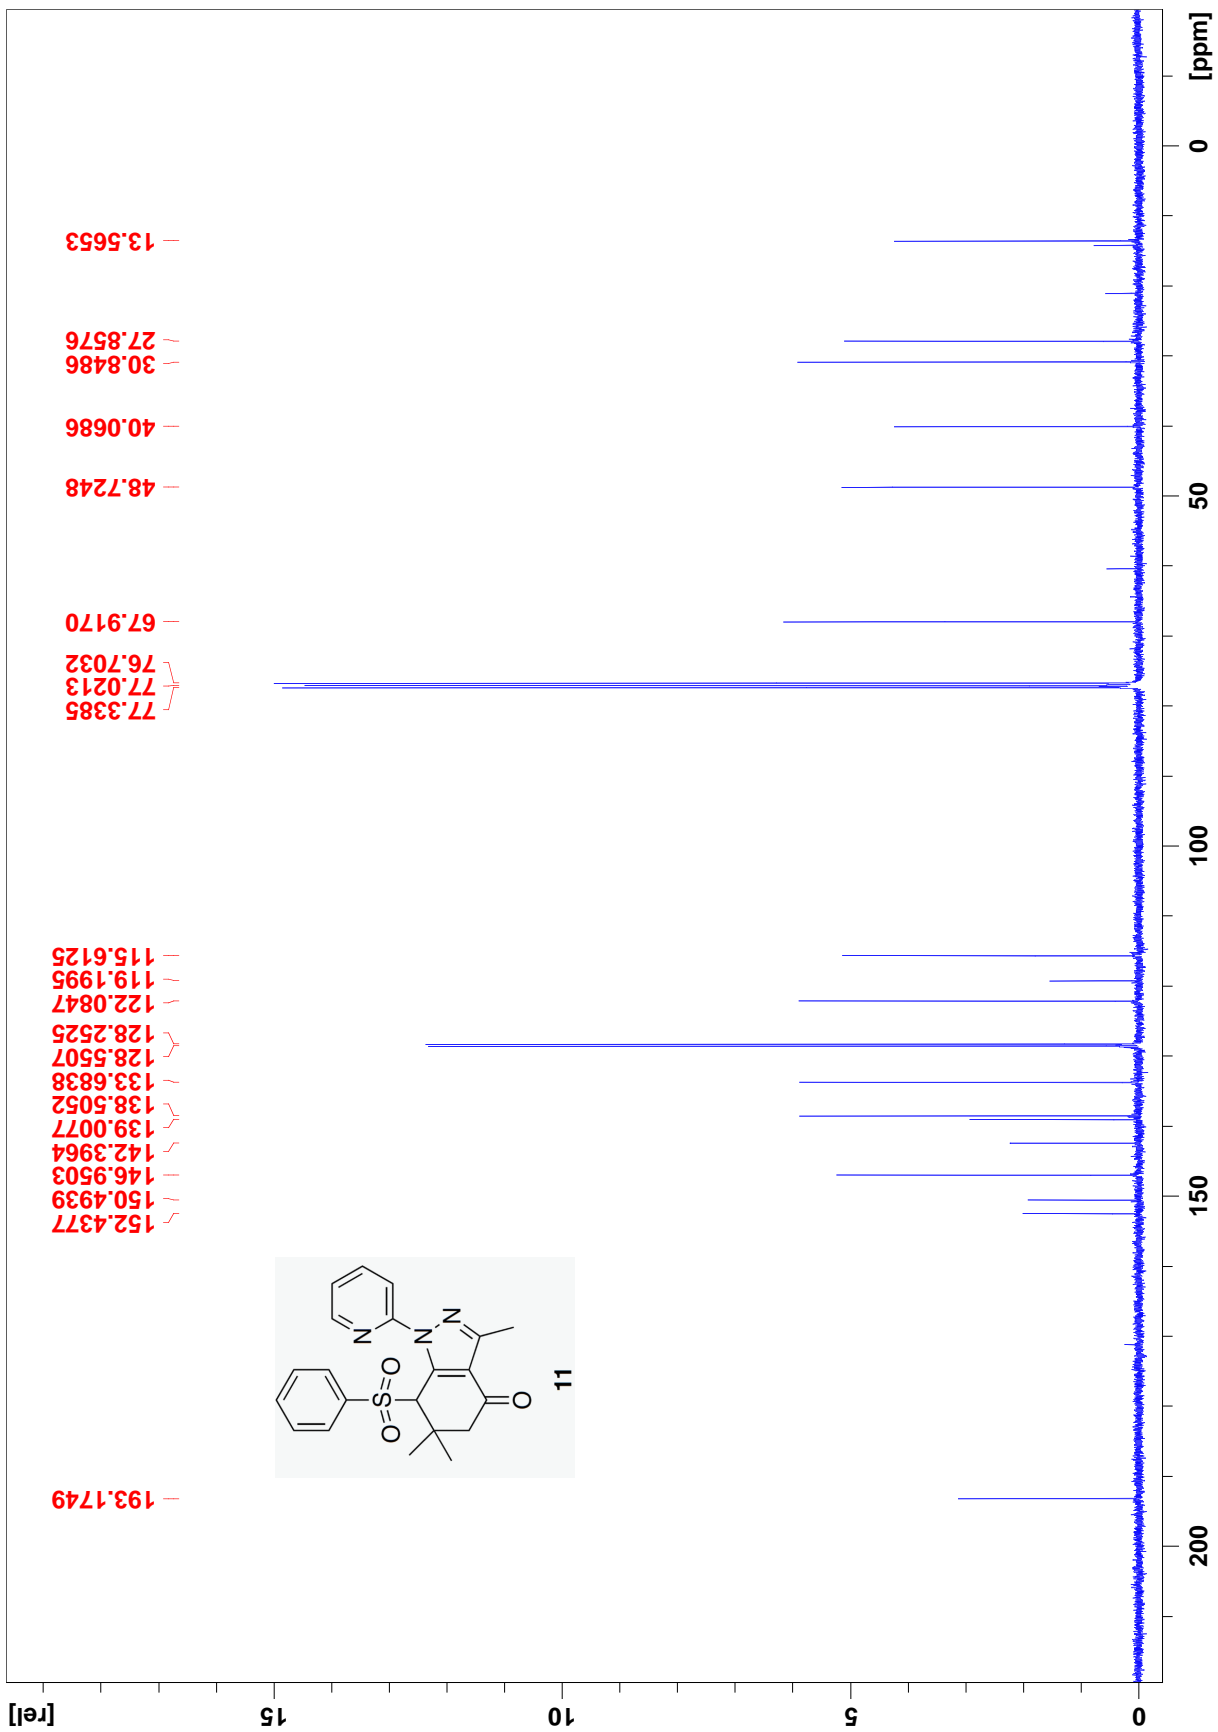

# 1H-NMR

JL08-100608 10 1 C:\Bruker\TOPSPIN leex3451

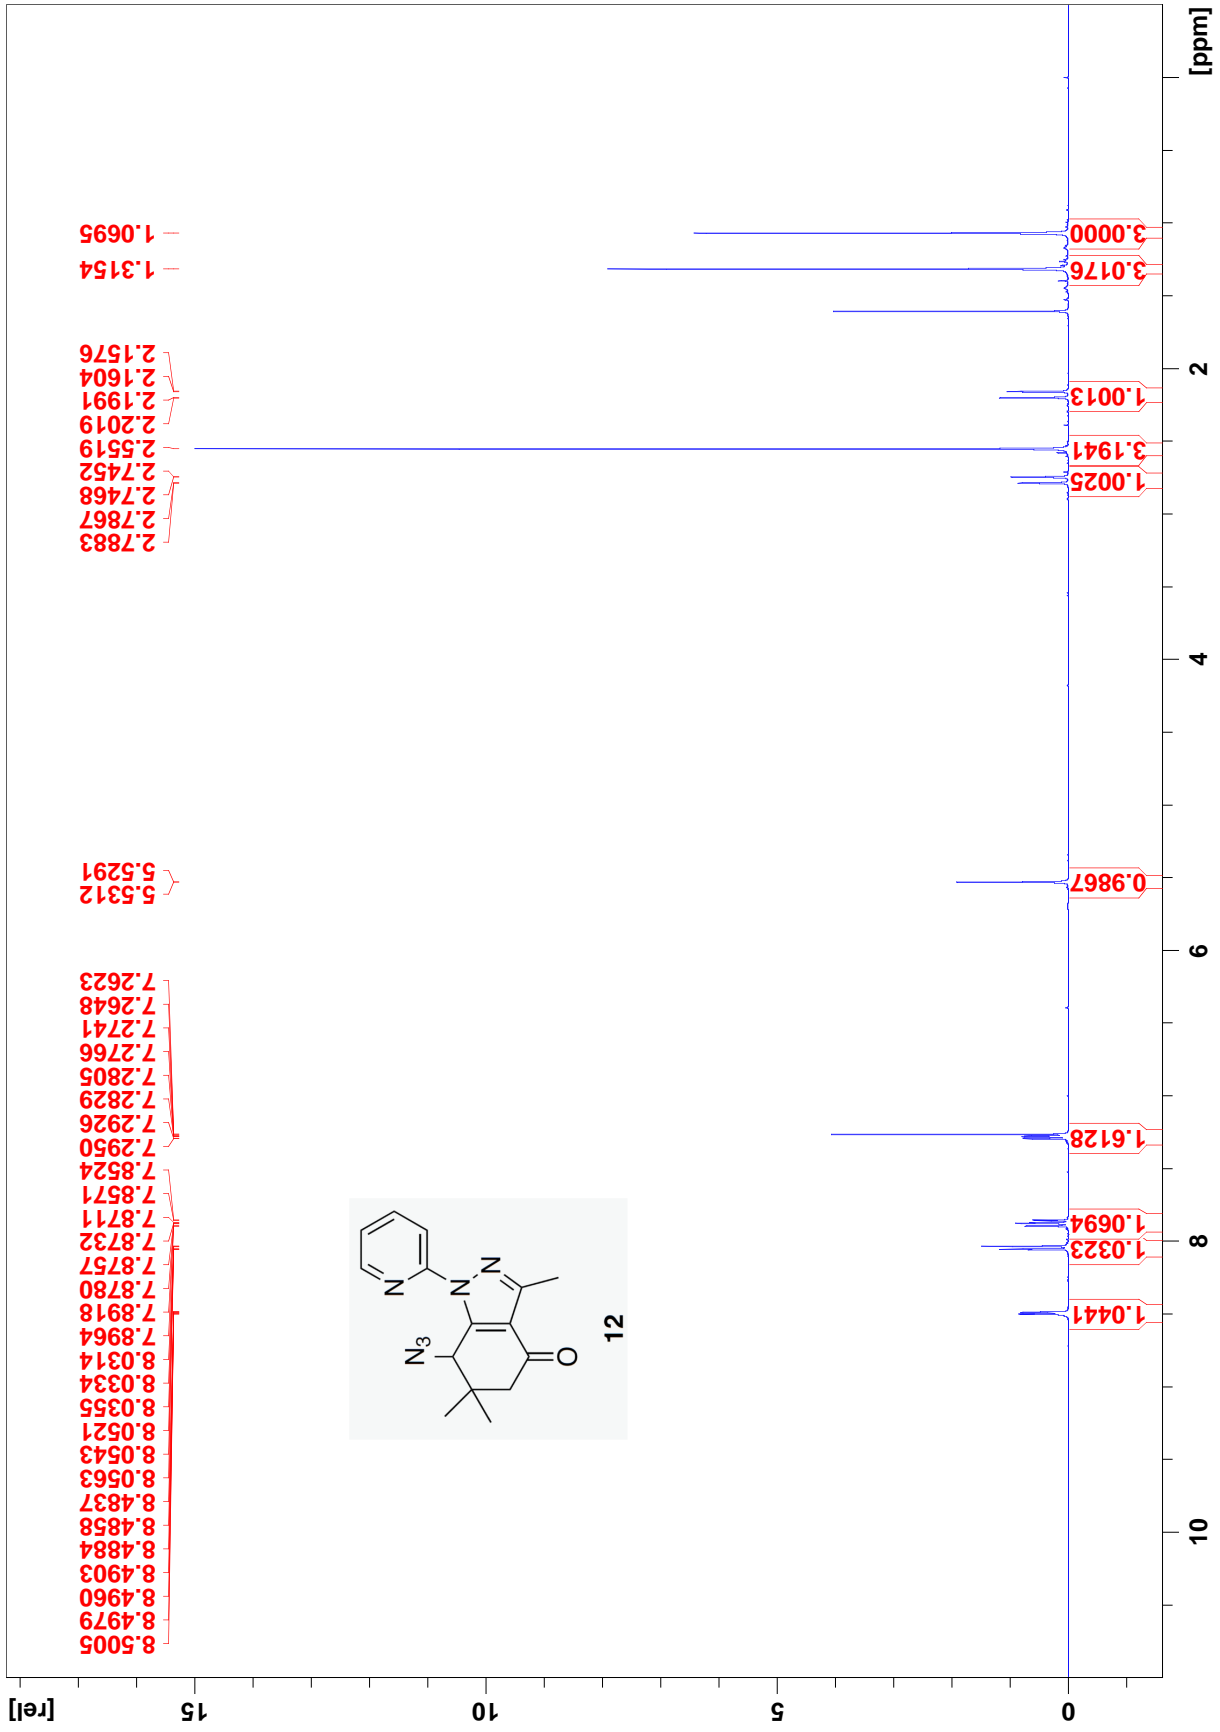

# 13C-NMR

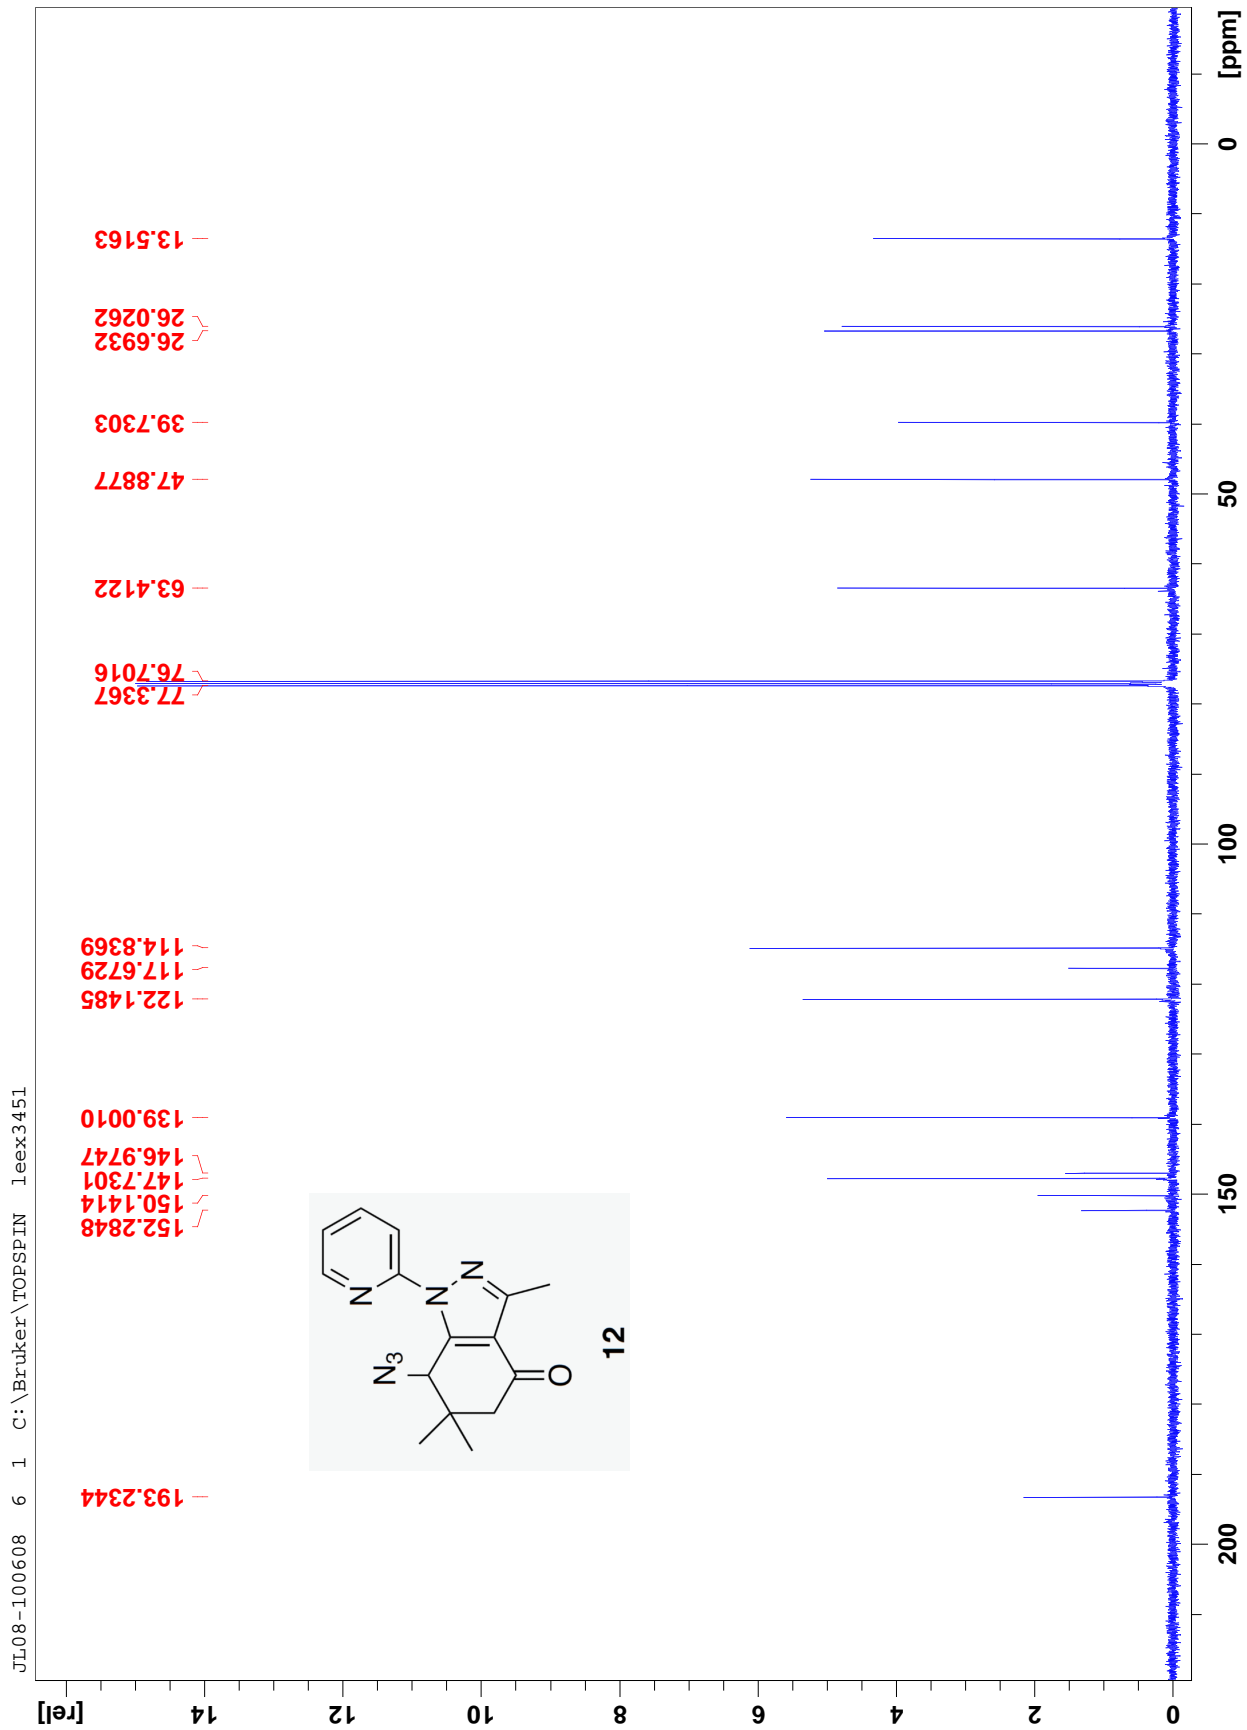

# 1H-NMR

JL08-100908B 1 1 C:\Bruker\TOPSPIN leex3451

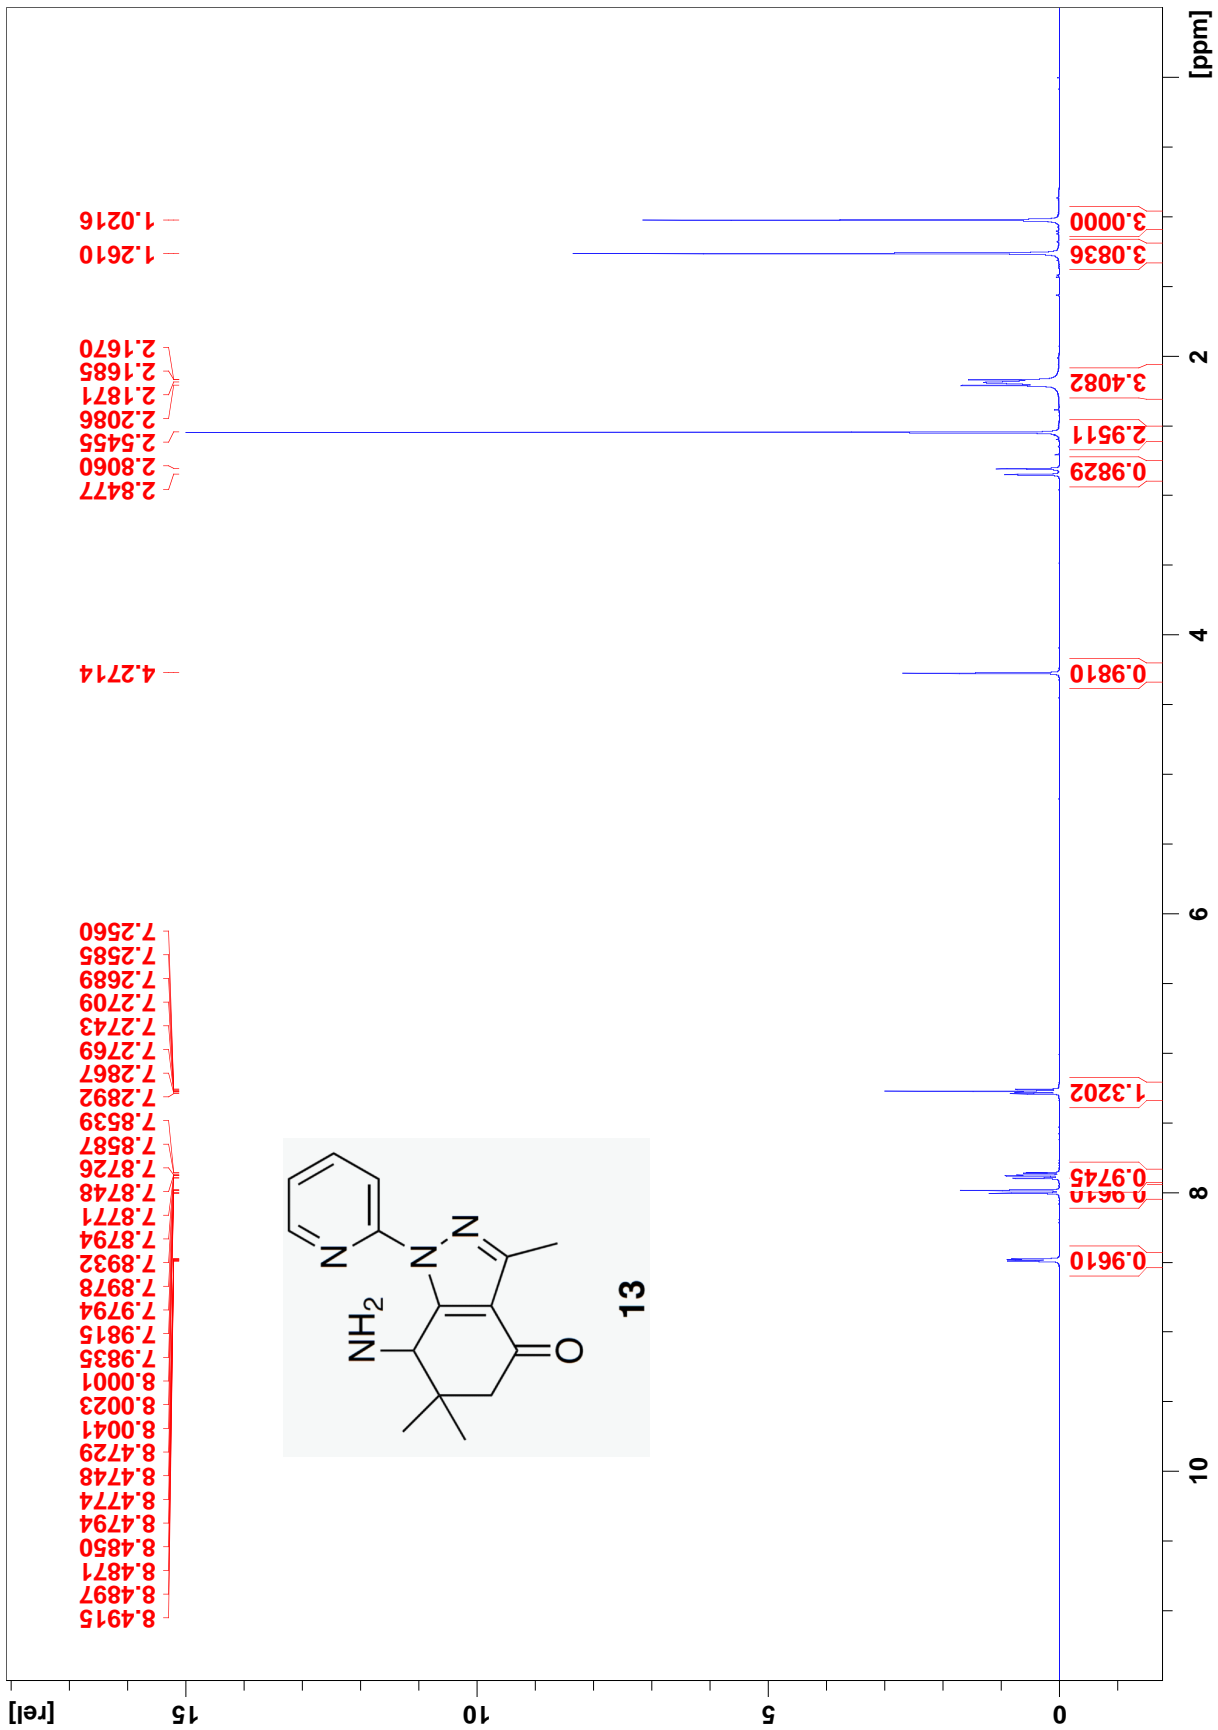

# 13C-NMR

JL08-100908B 3 1 C:\Bruker\TOPSPIN leex3451

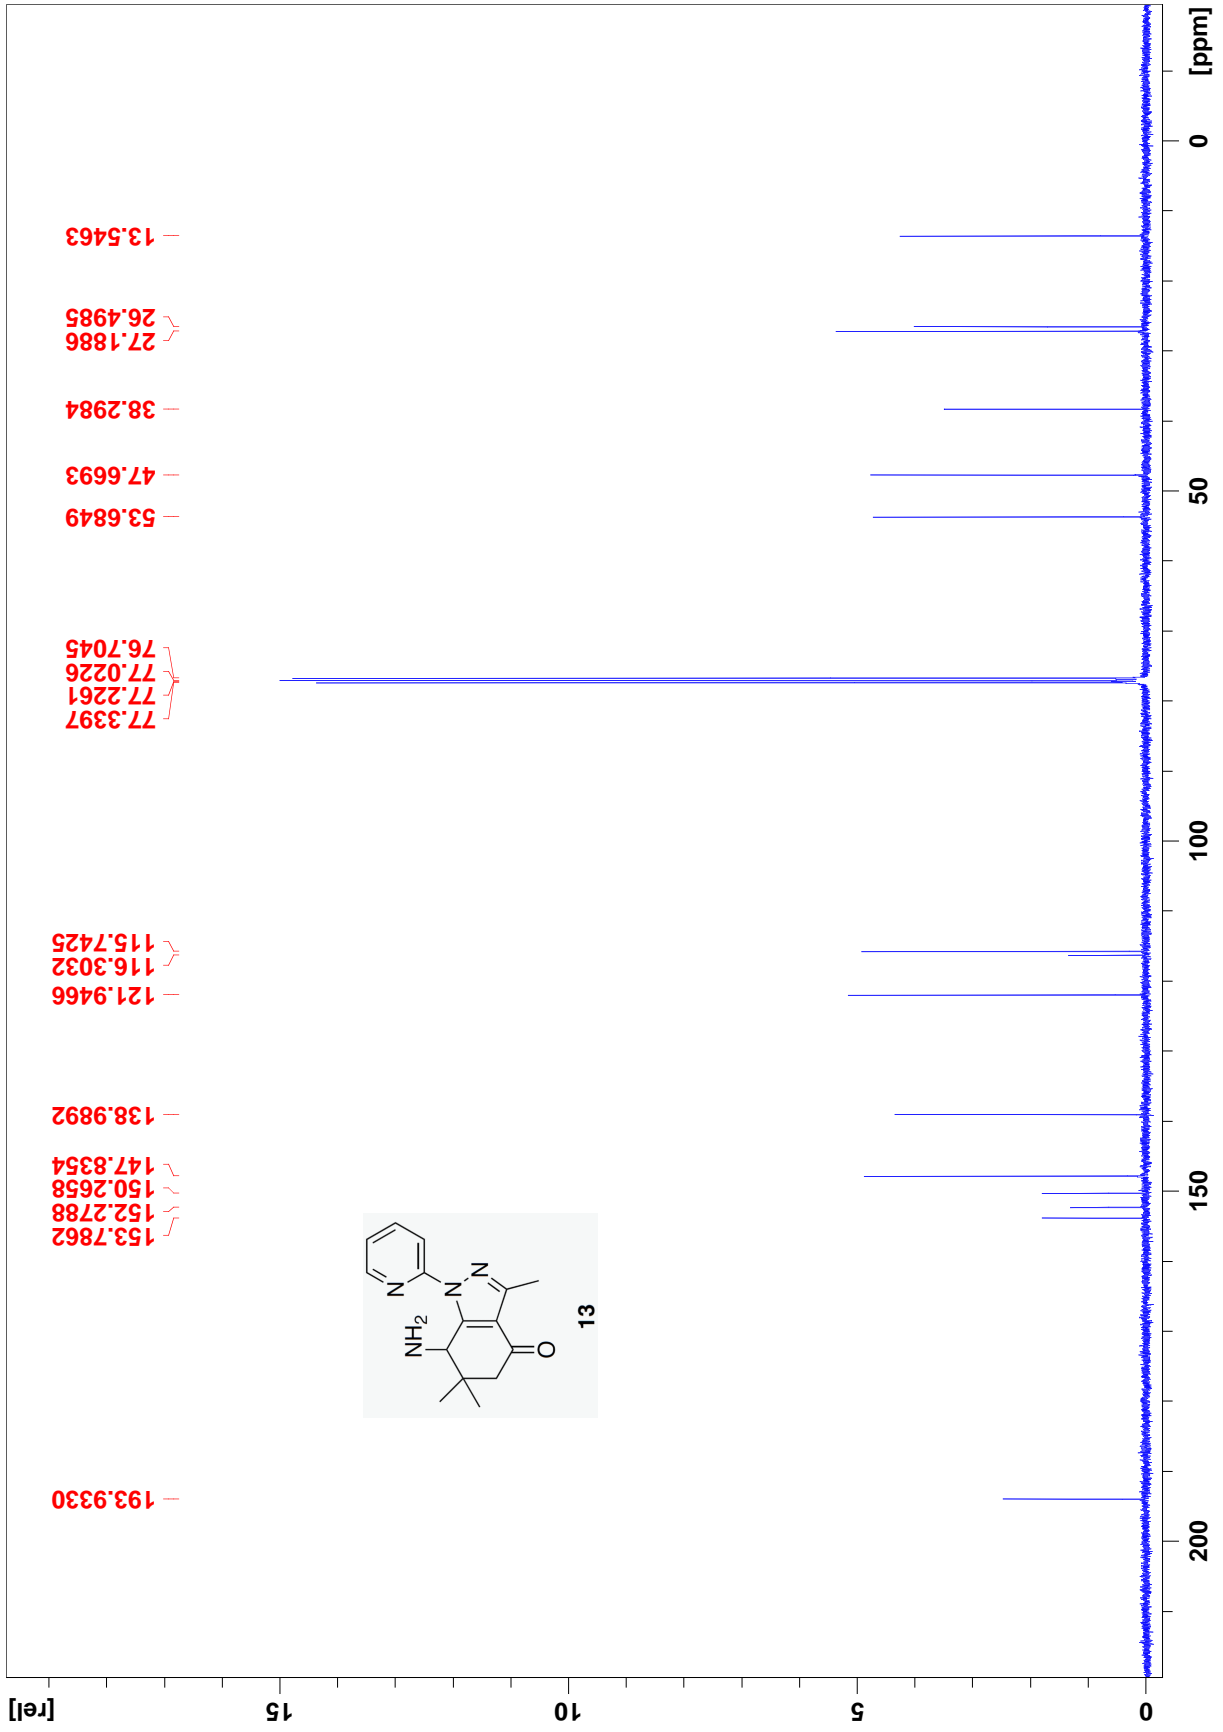

# <sup>1</sup>H-NMR

JL08-102108A 1 1 C:\Bruker\TOPSPIN leex3451

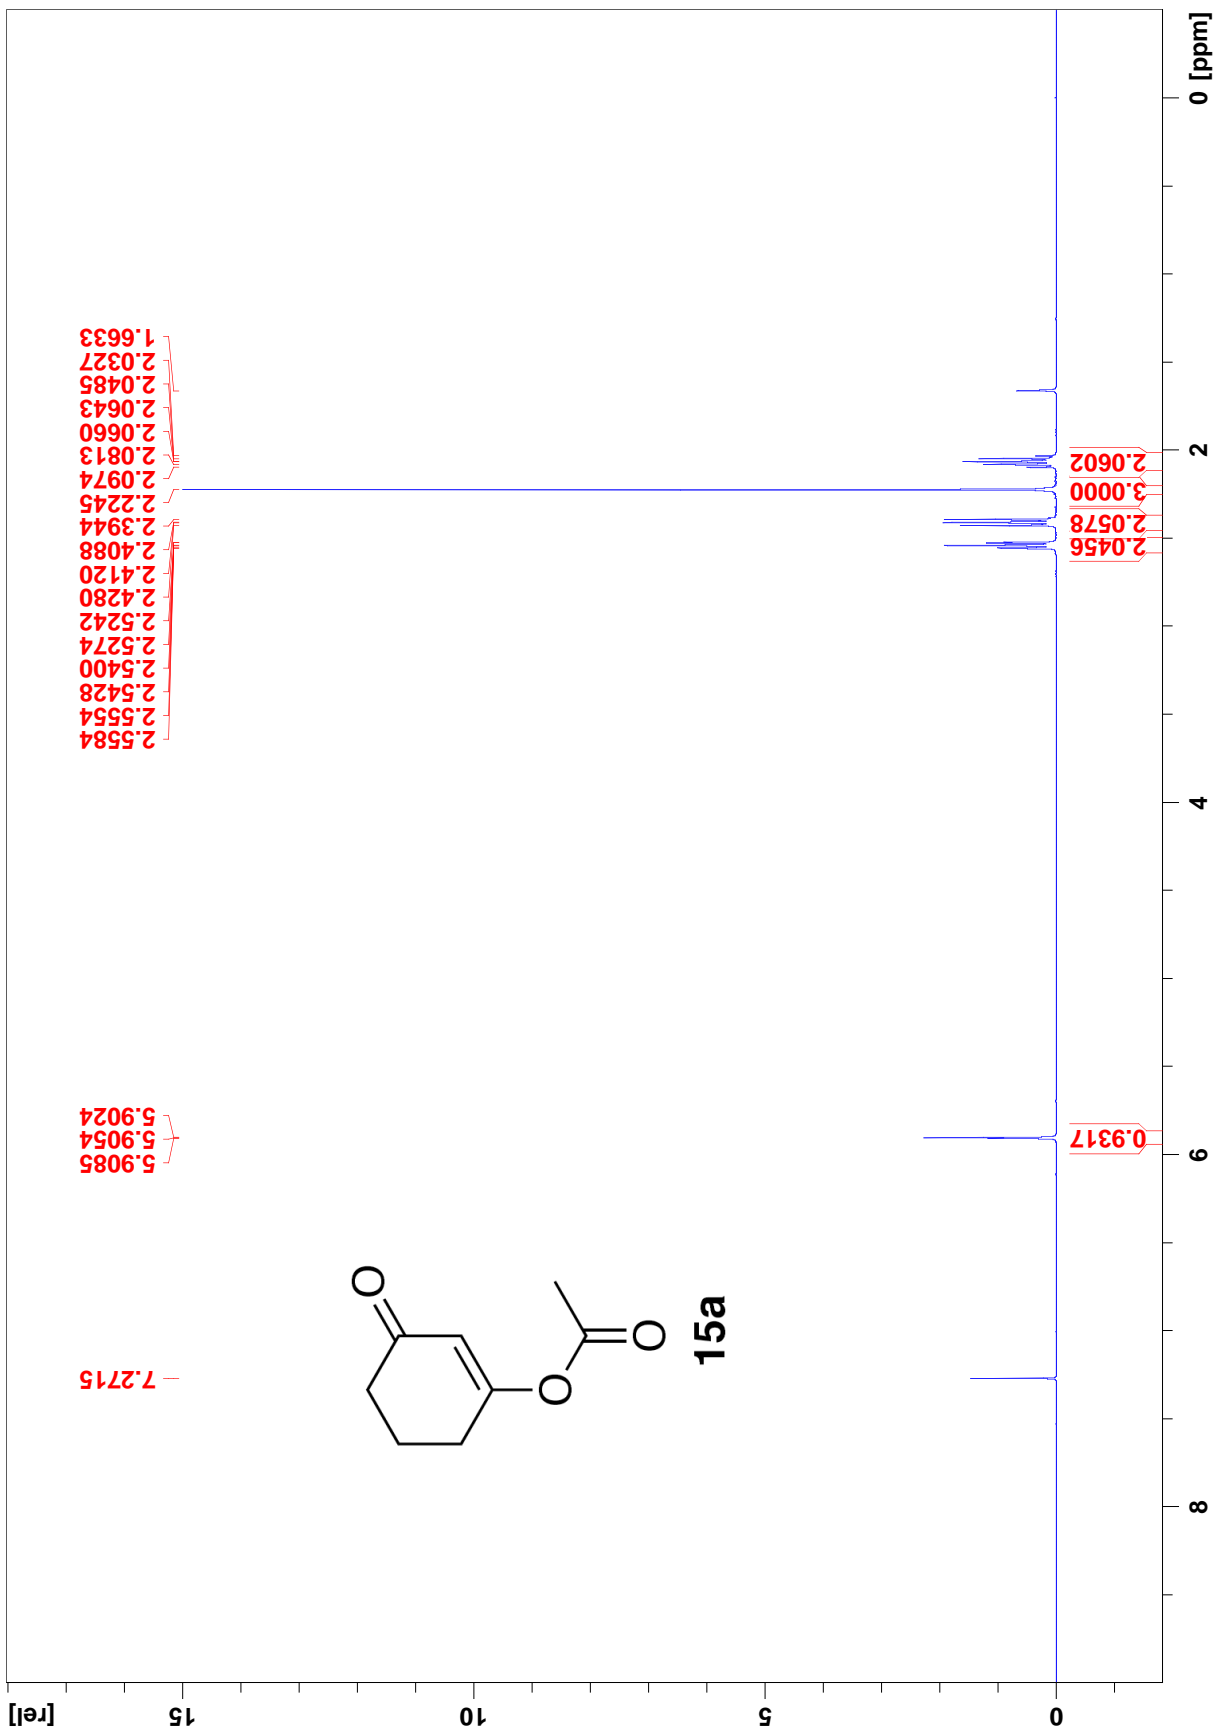

# 13C-NMR

JL08-102108A 3 1 C:\Bruker\TOPSPIN leex3451

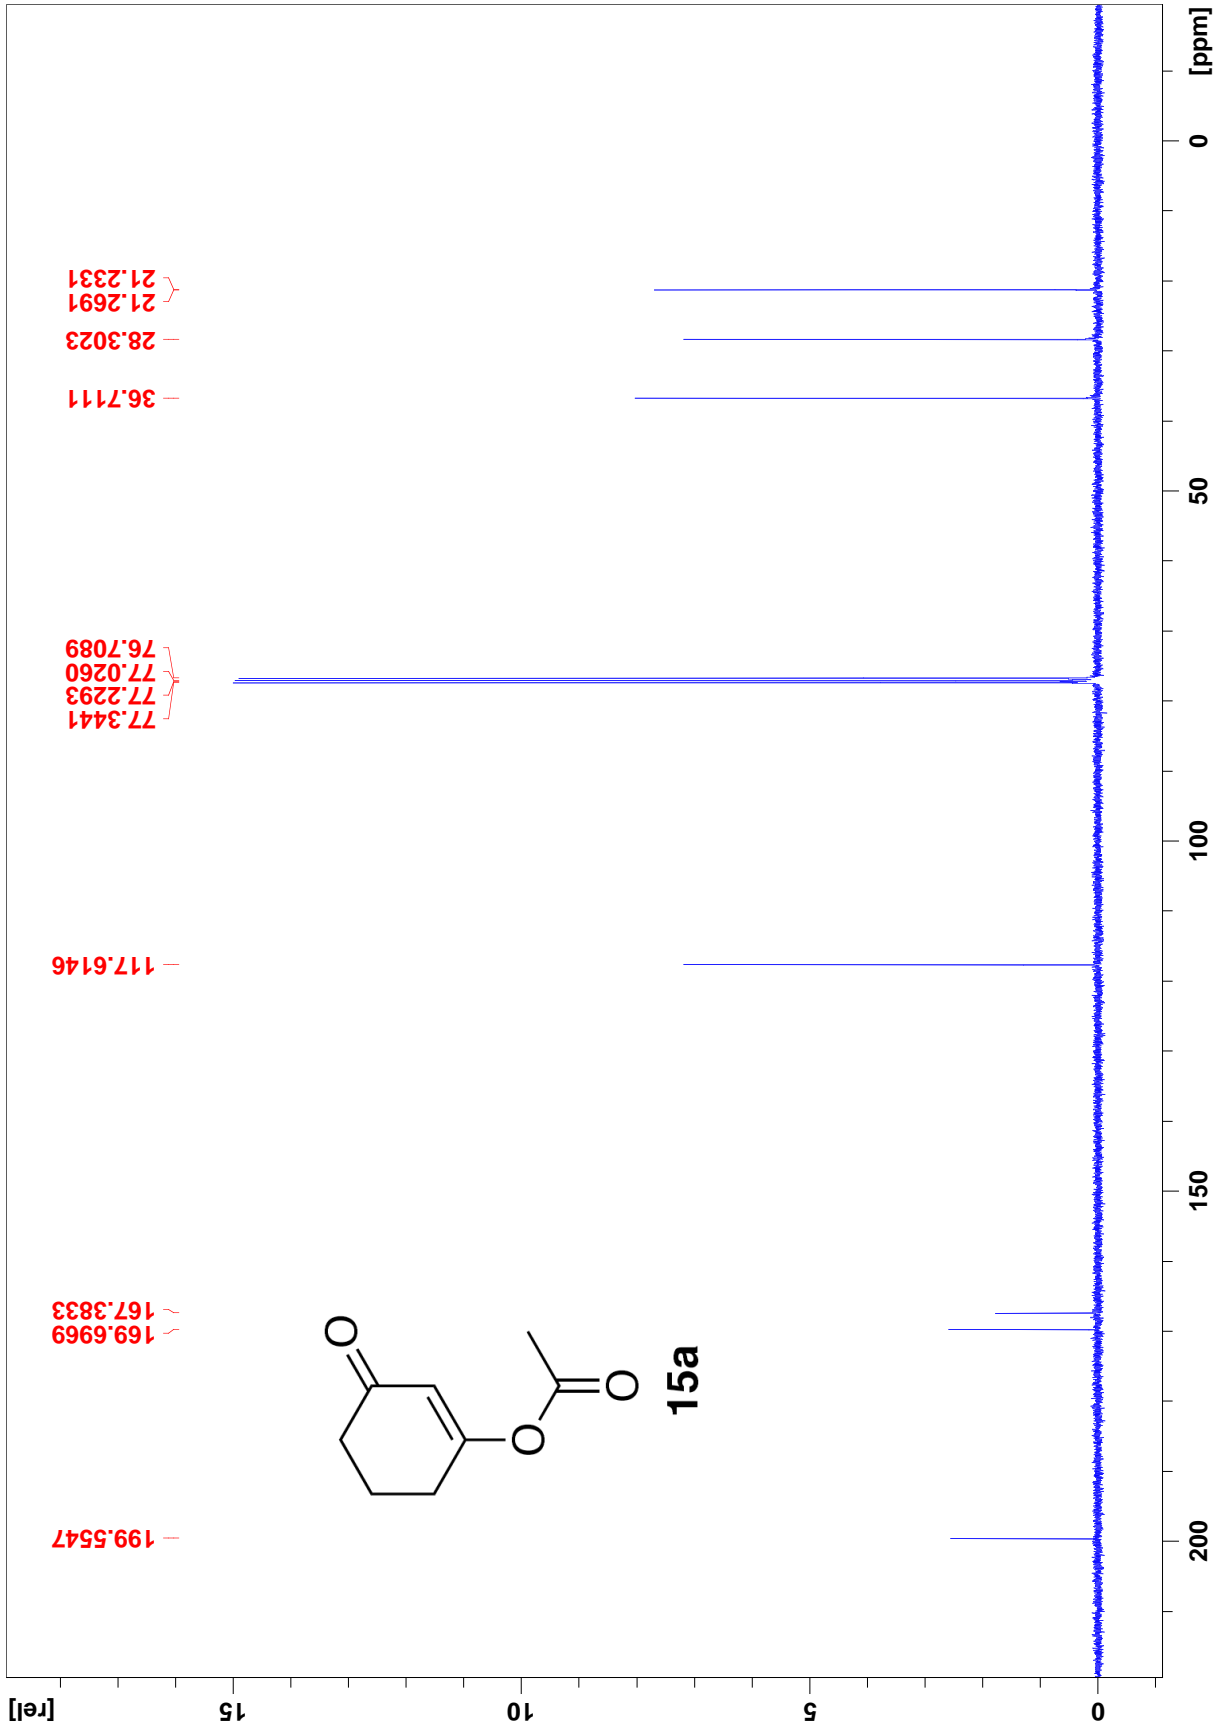

# 1H-NMR

JL08-102208A 1 1 C:\Bruker\TOPSPIN leex3451

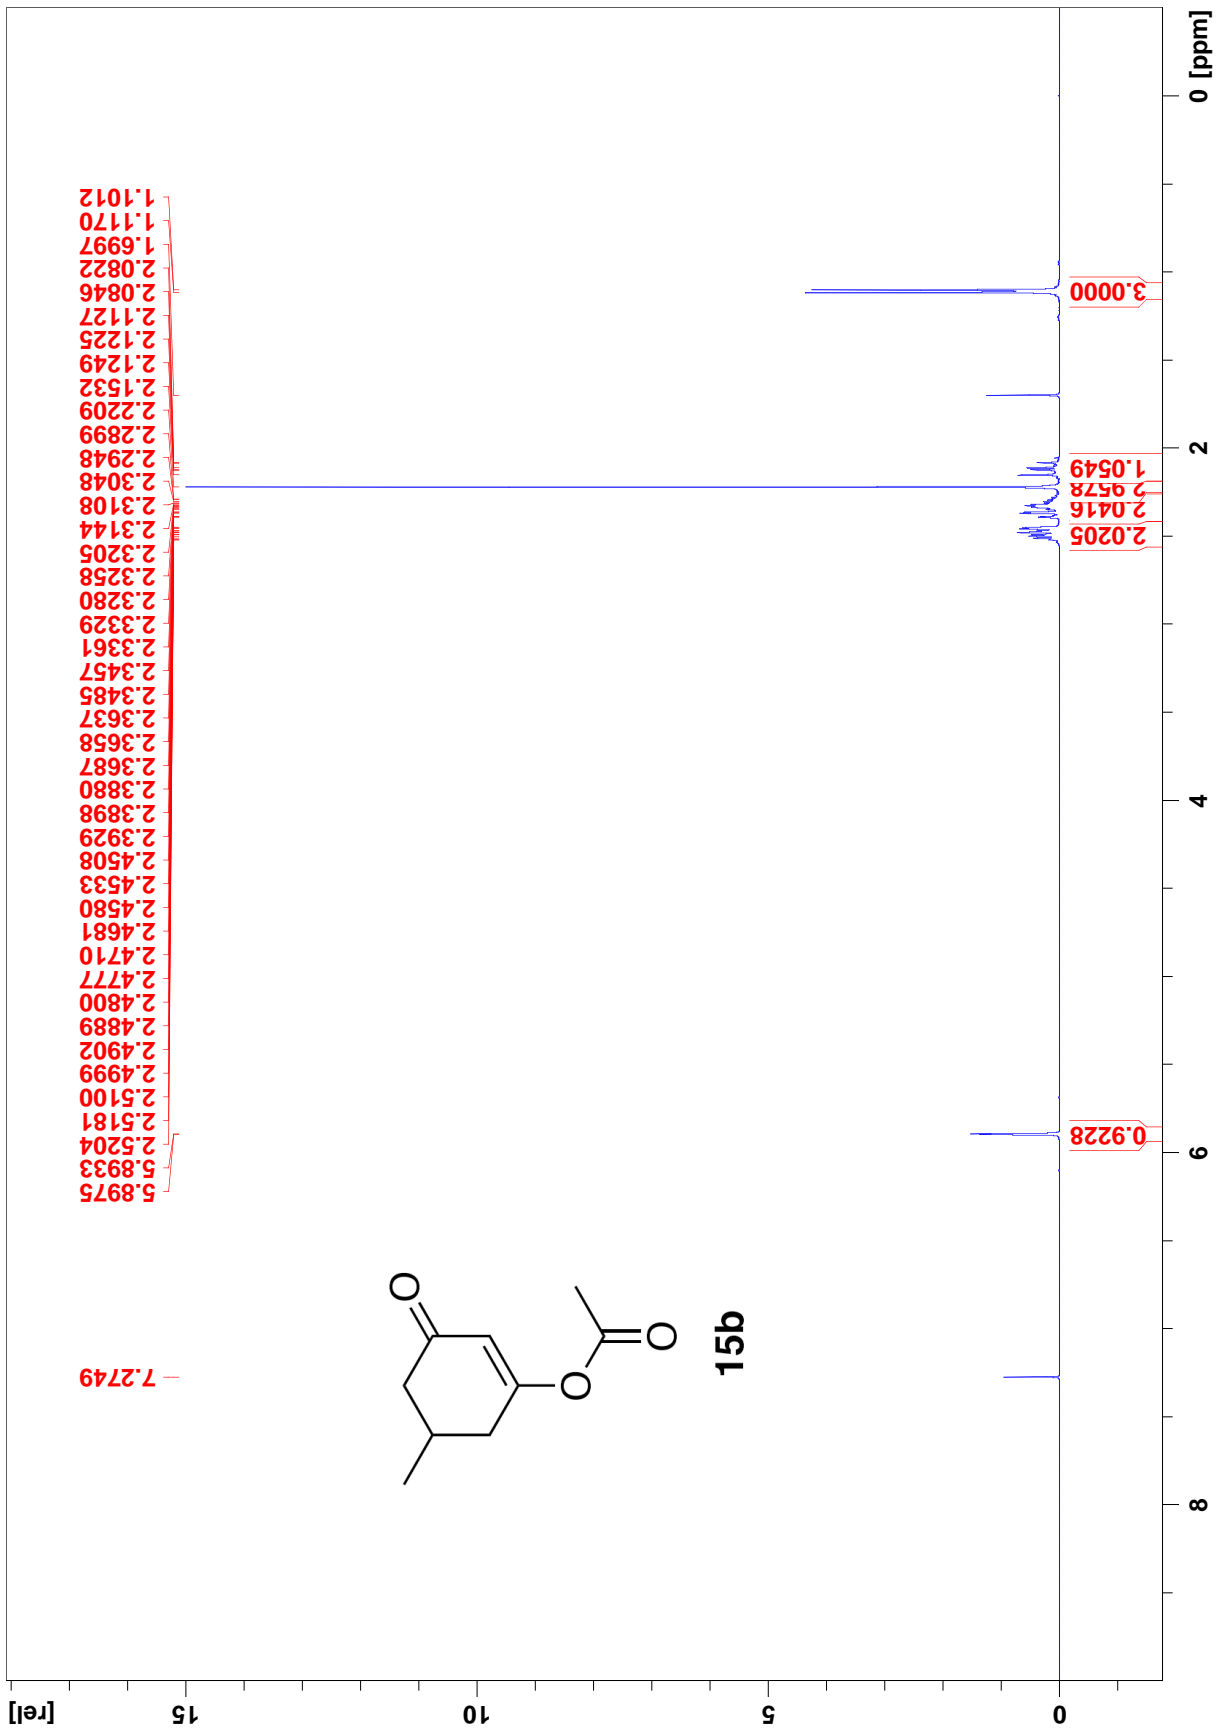



# 13C-NMR

JL08-102208A 5 1 C:\Bruker\TOPSPIN leex3451

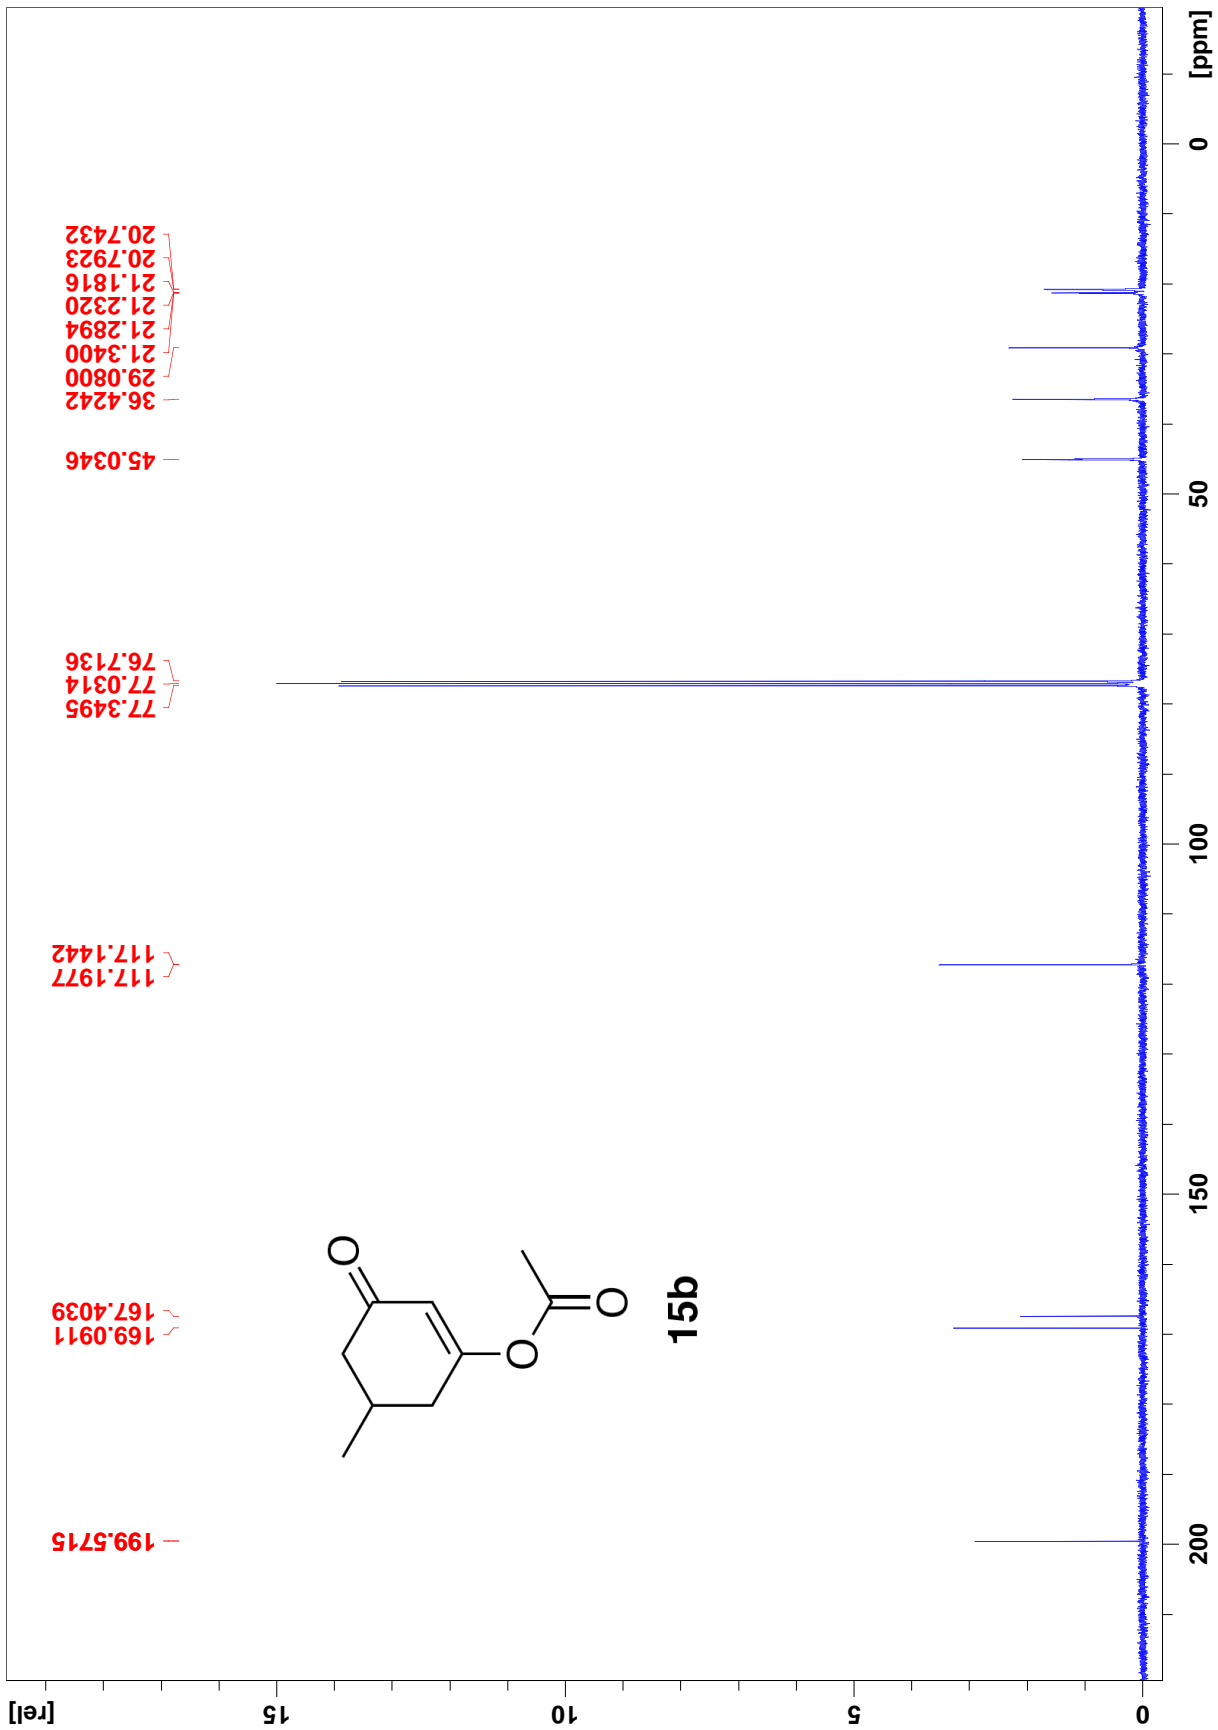

# 1H-NMR

JL08-102308A 1 1 C:\Bruker\TOPSPIN leex3451

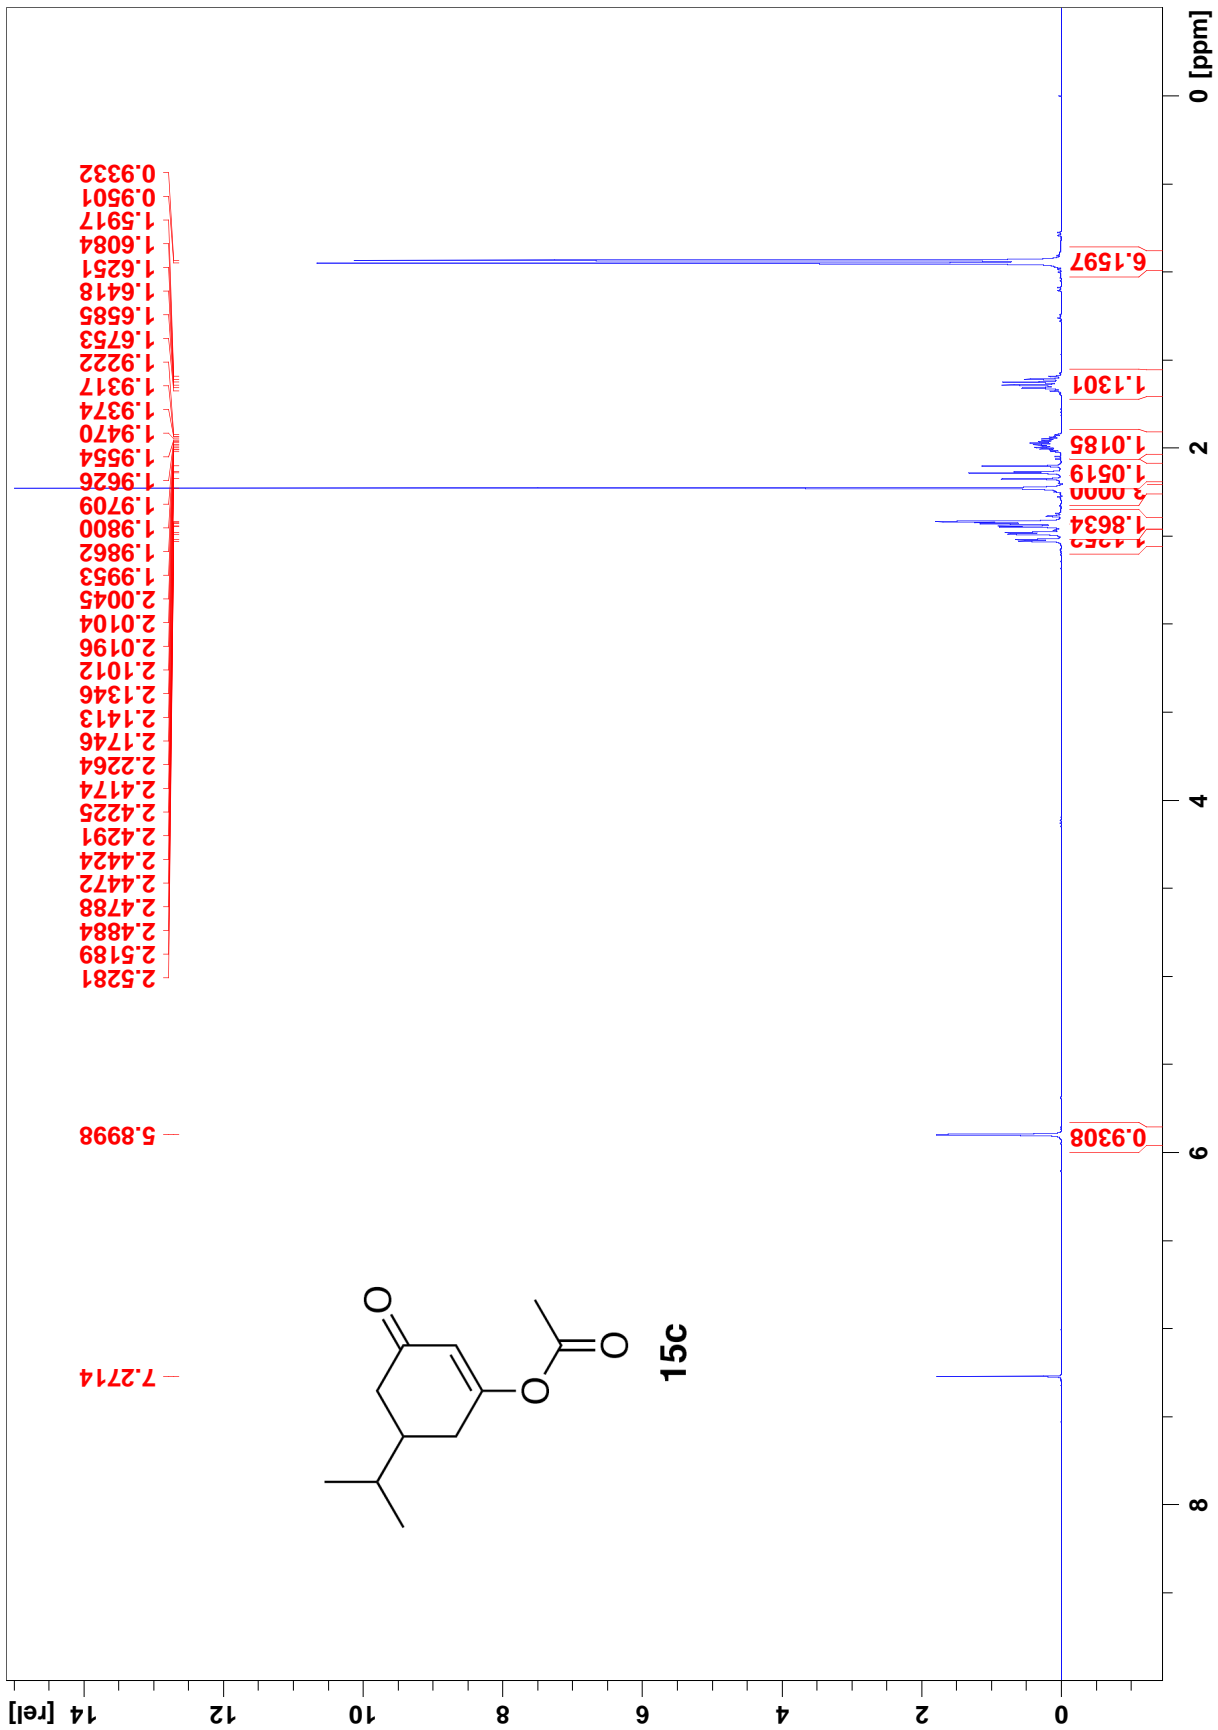

# 13C-NMR

JL08-102308A 5 1 C:\Bruker\TOPSPIN leex3451

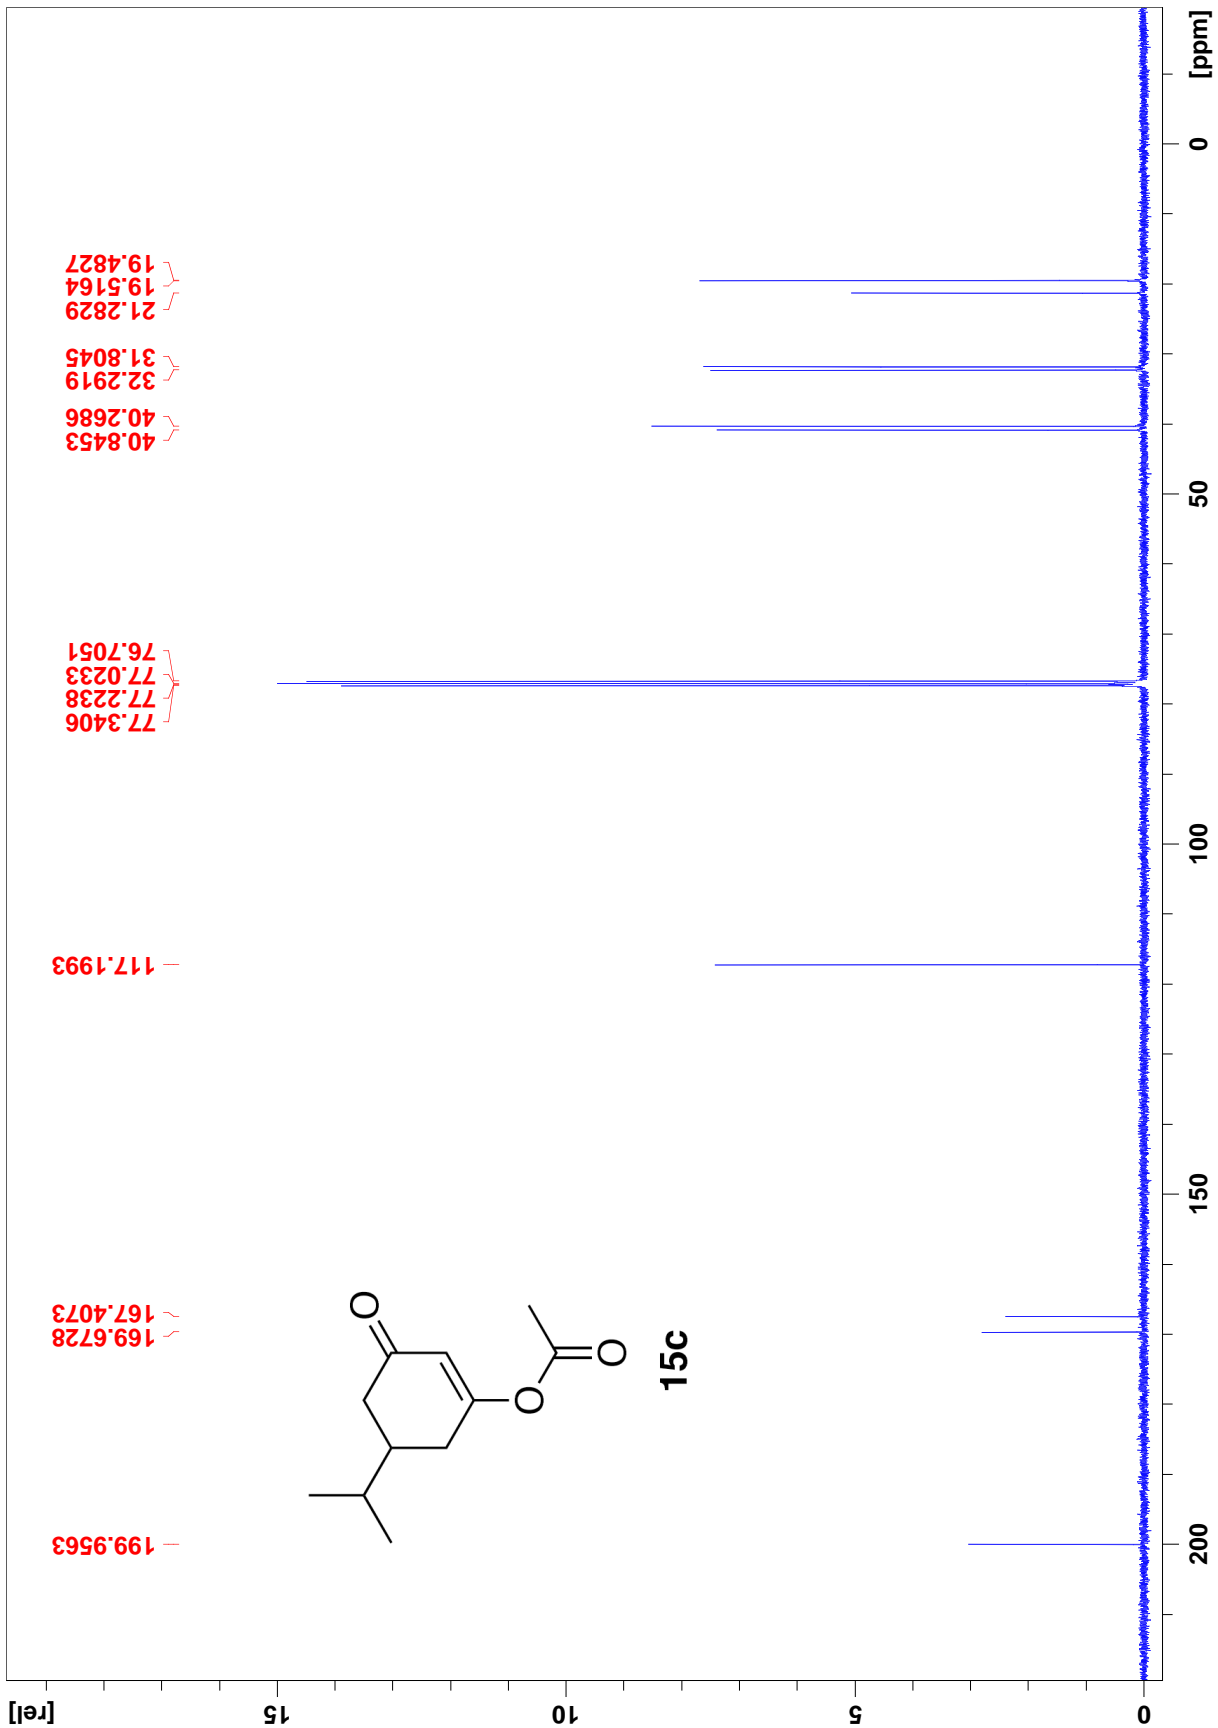

# 1H-NMR

JL08-102408A 1 1 C:\Bruker\TOPSPIN leex3451

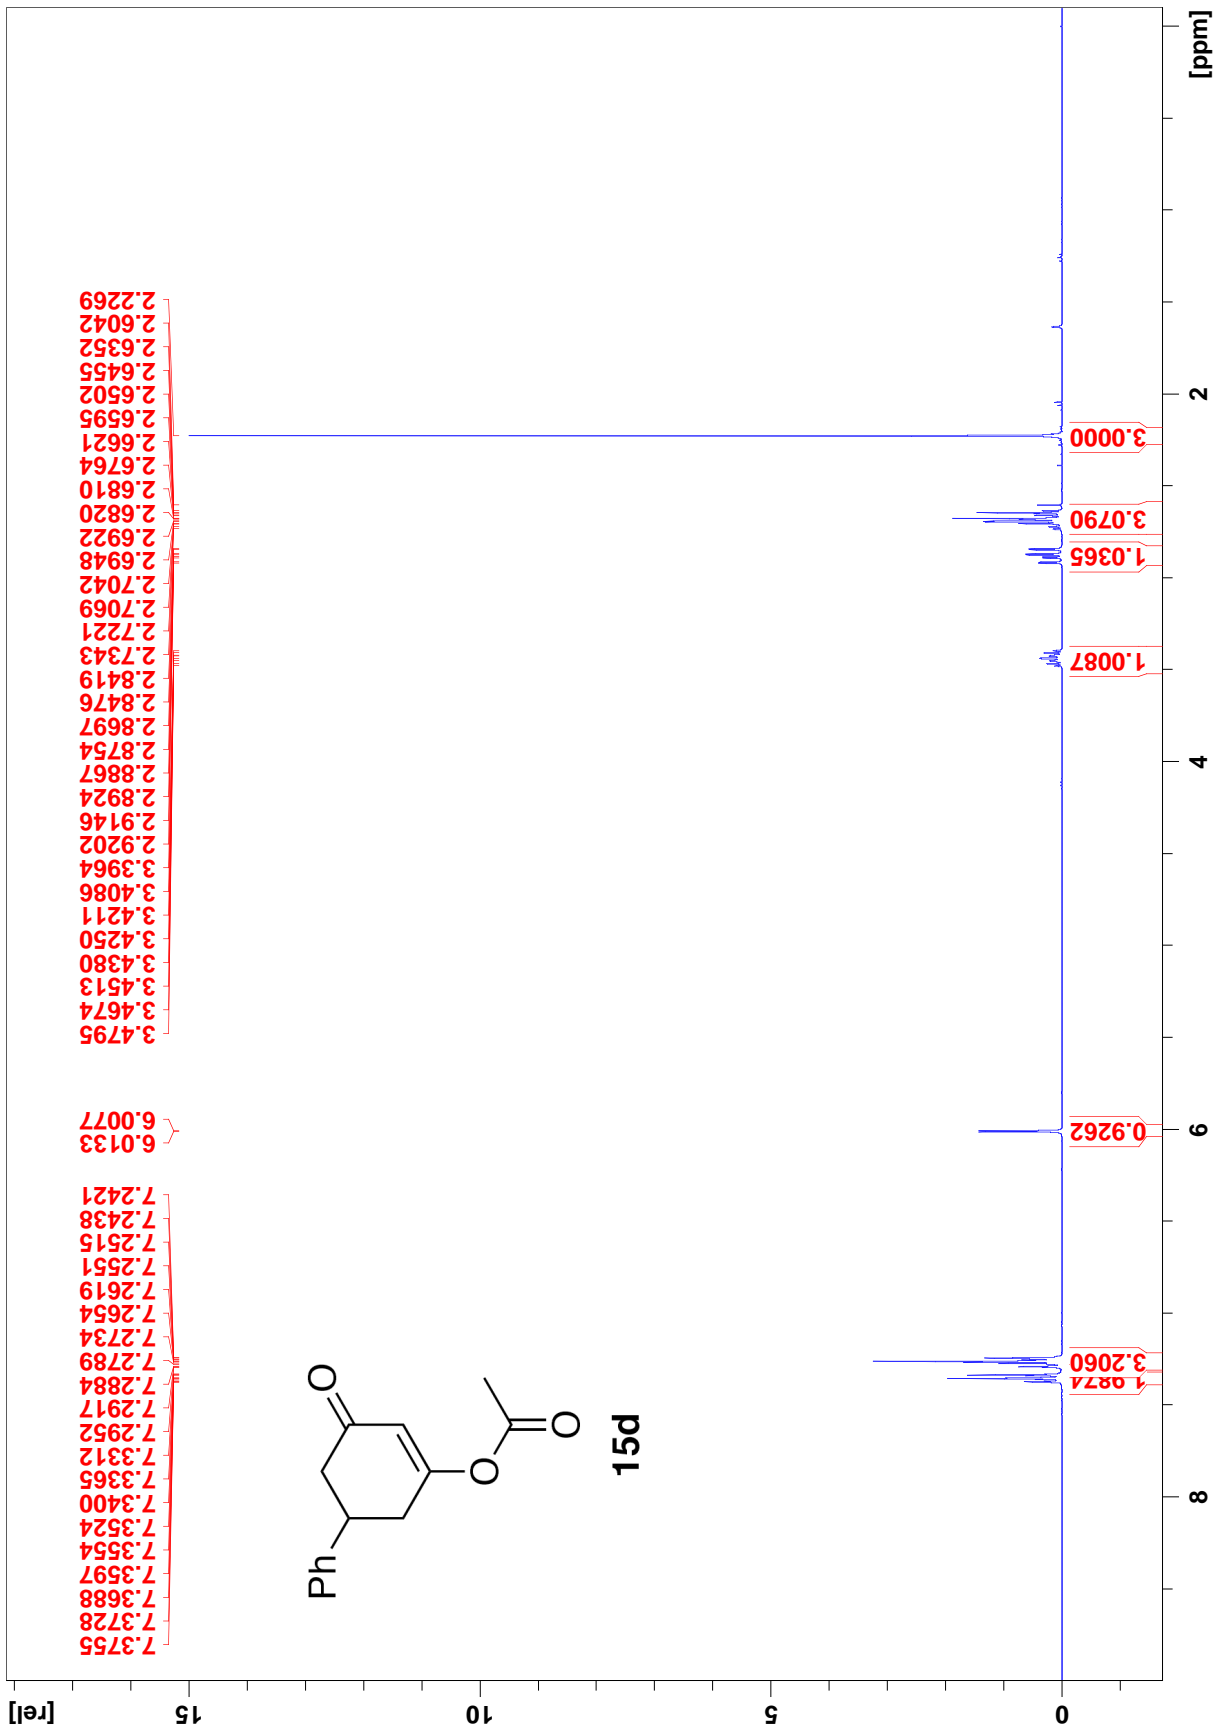

# 13C-NMR

JL08-102408A 5 1 C:\Bruker\TOPSPIN leex3451

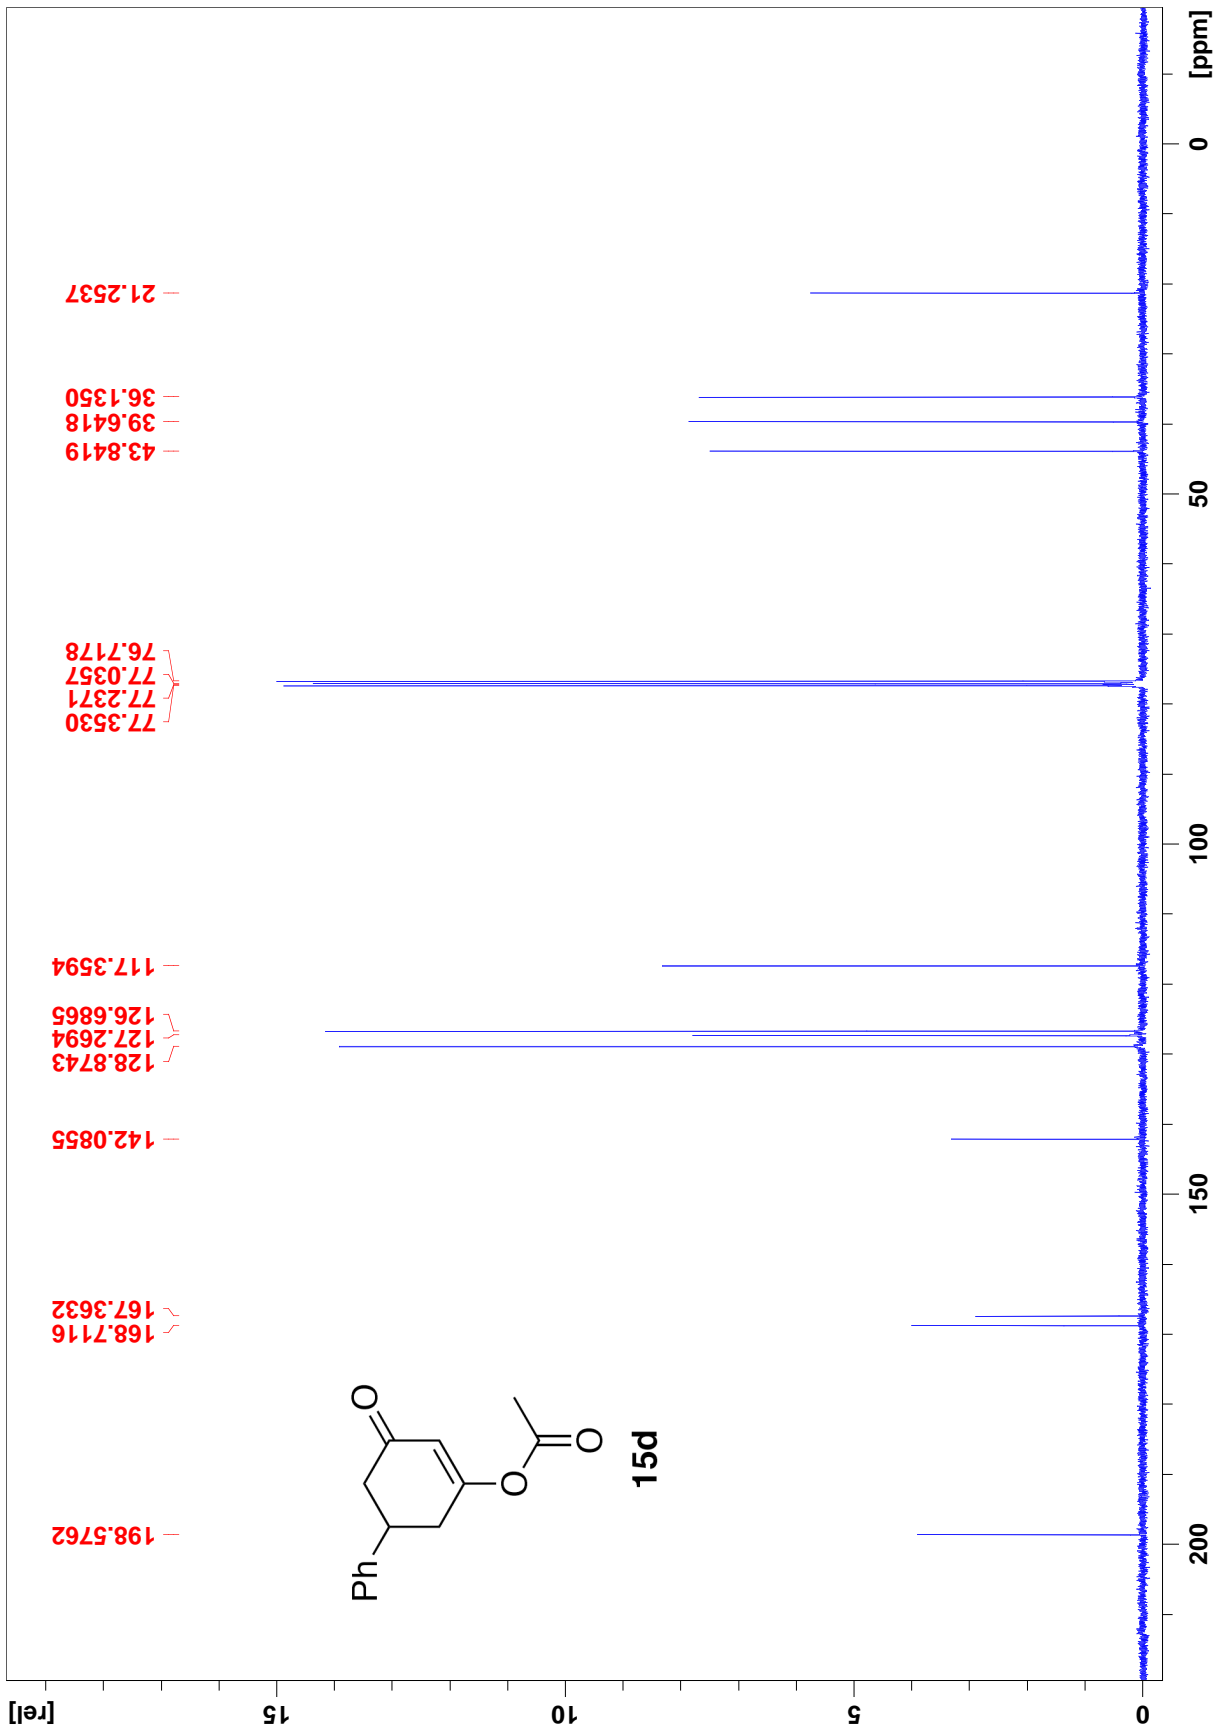

# 1H-NMR

JL08-1110108 1 1 C:\Bruker\TOPSPIN leex3451

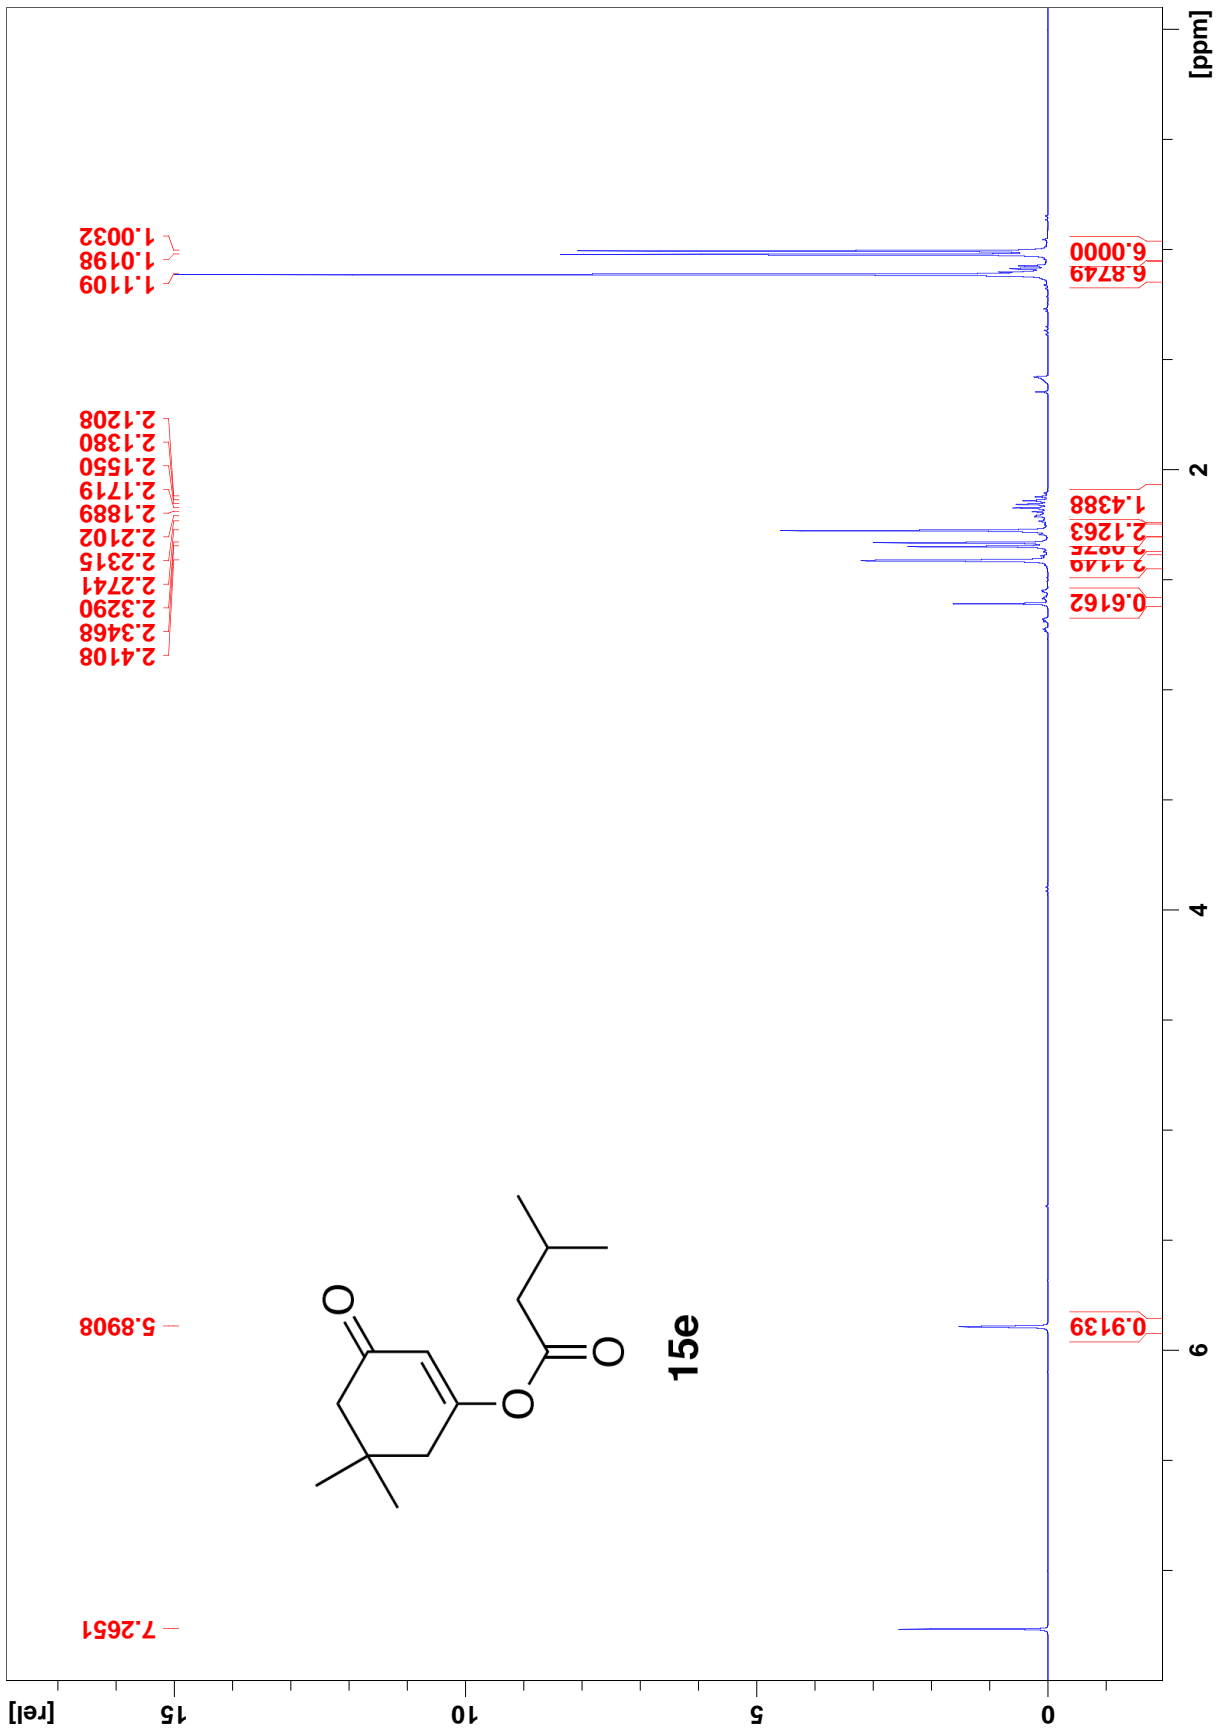

# 13C-NMR

JL08-1110108 3 1 C:\Bruker\TOPSPIN leex3451

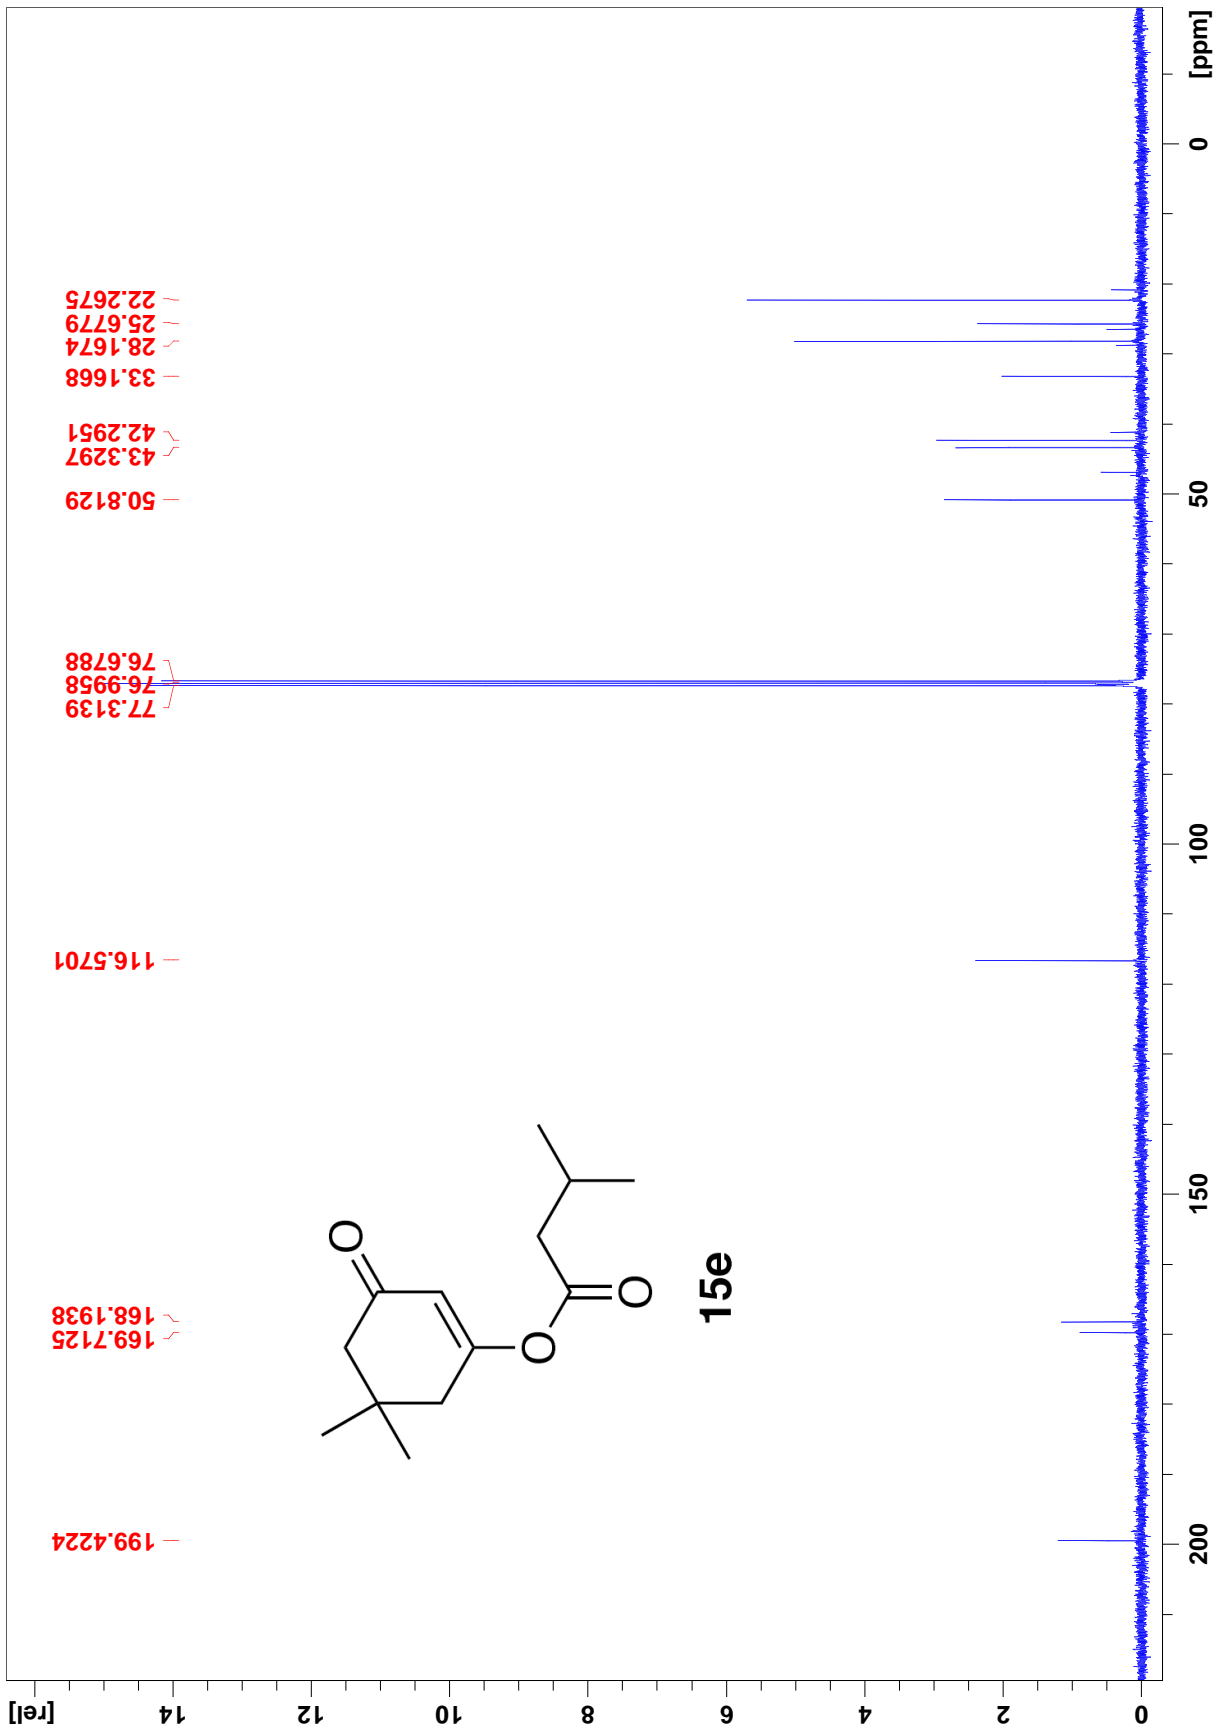

# <sup>1</sup>H-NMR

JL08-1110308 1 1 C:\Bruker\TOPSPIN leex3451

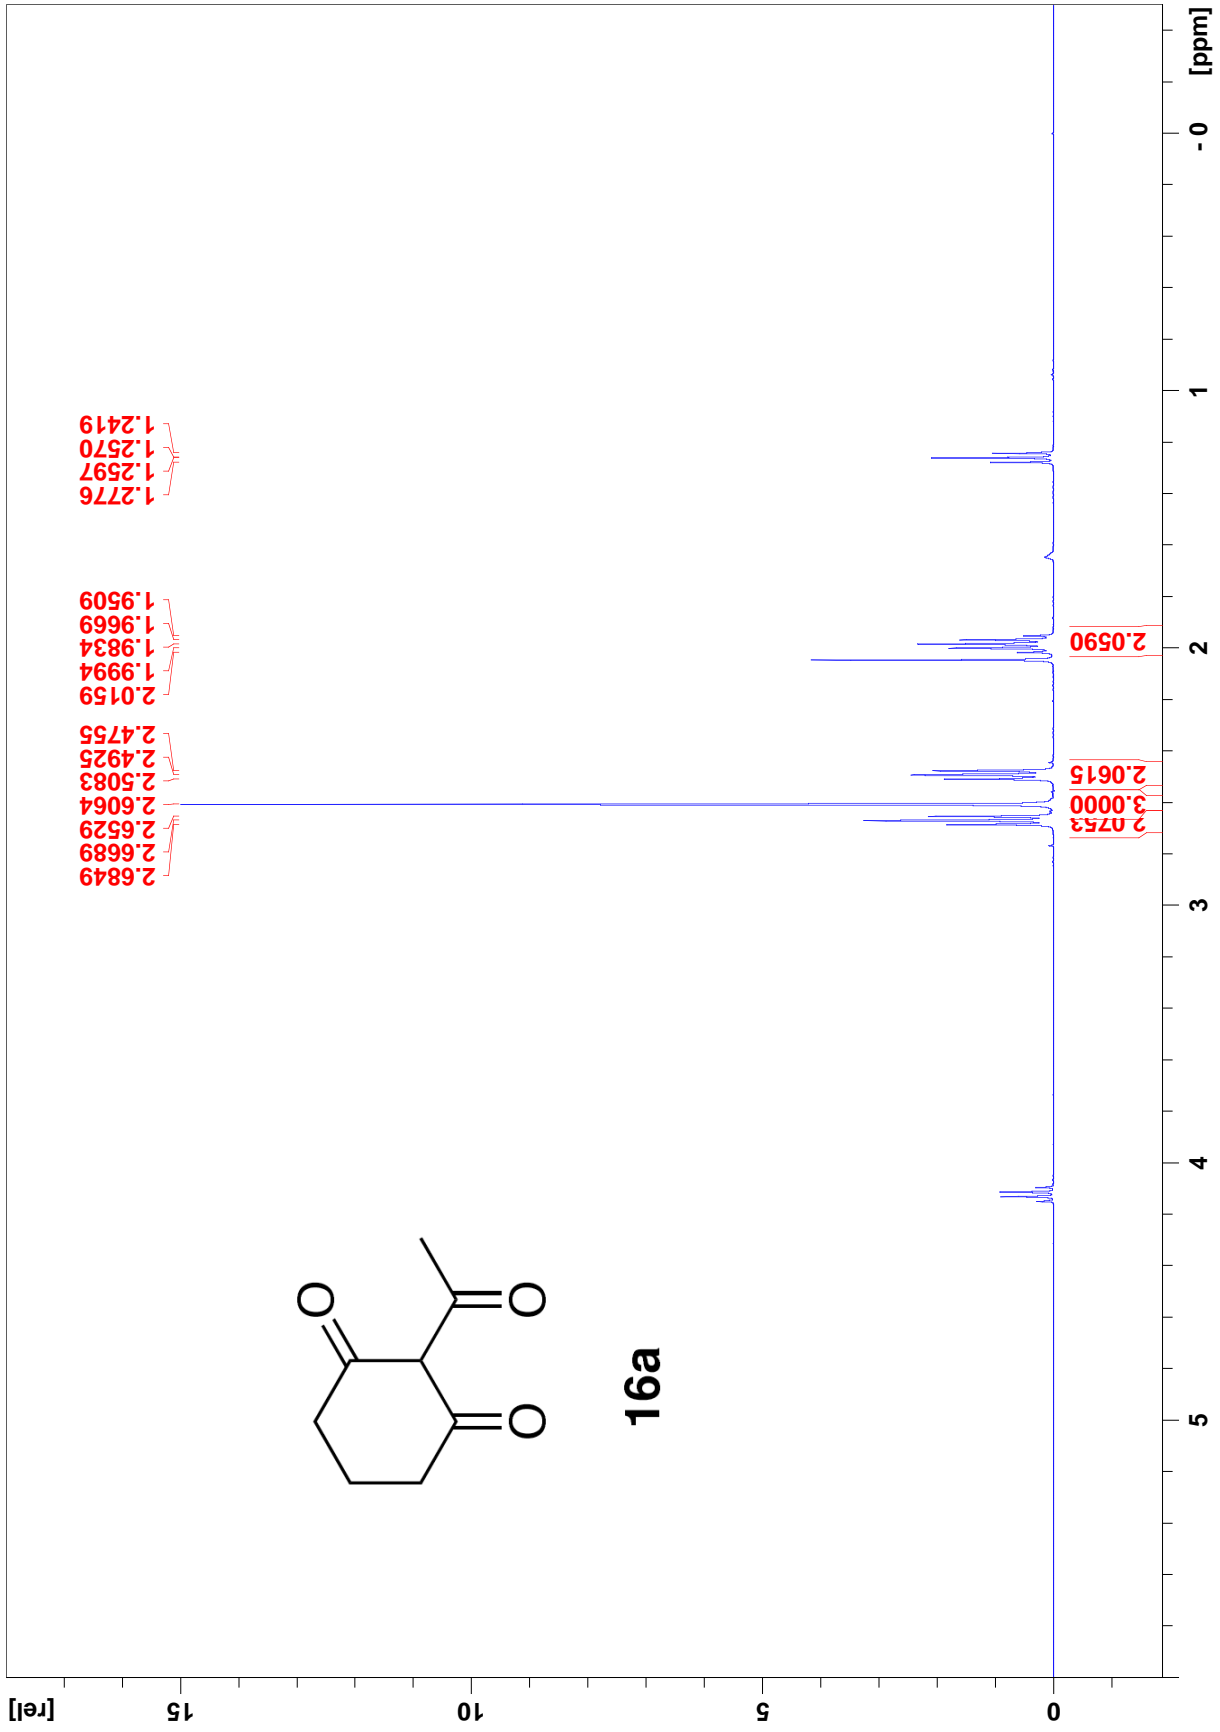



# 13C-NMR

JL08-1110308 3 1 C:\Bruker\TOPSPIN leex3451

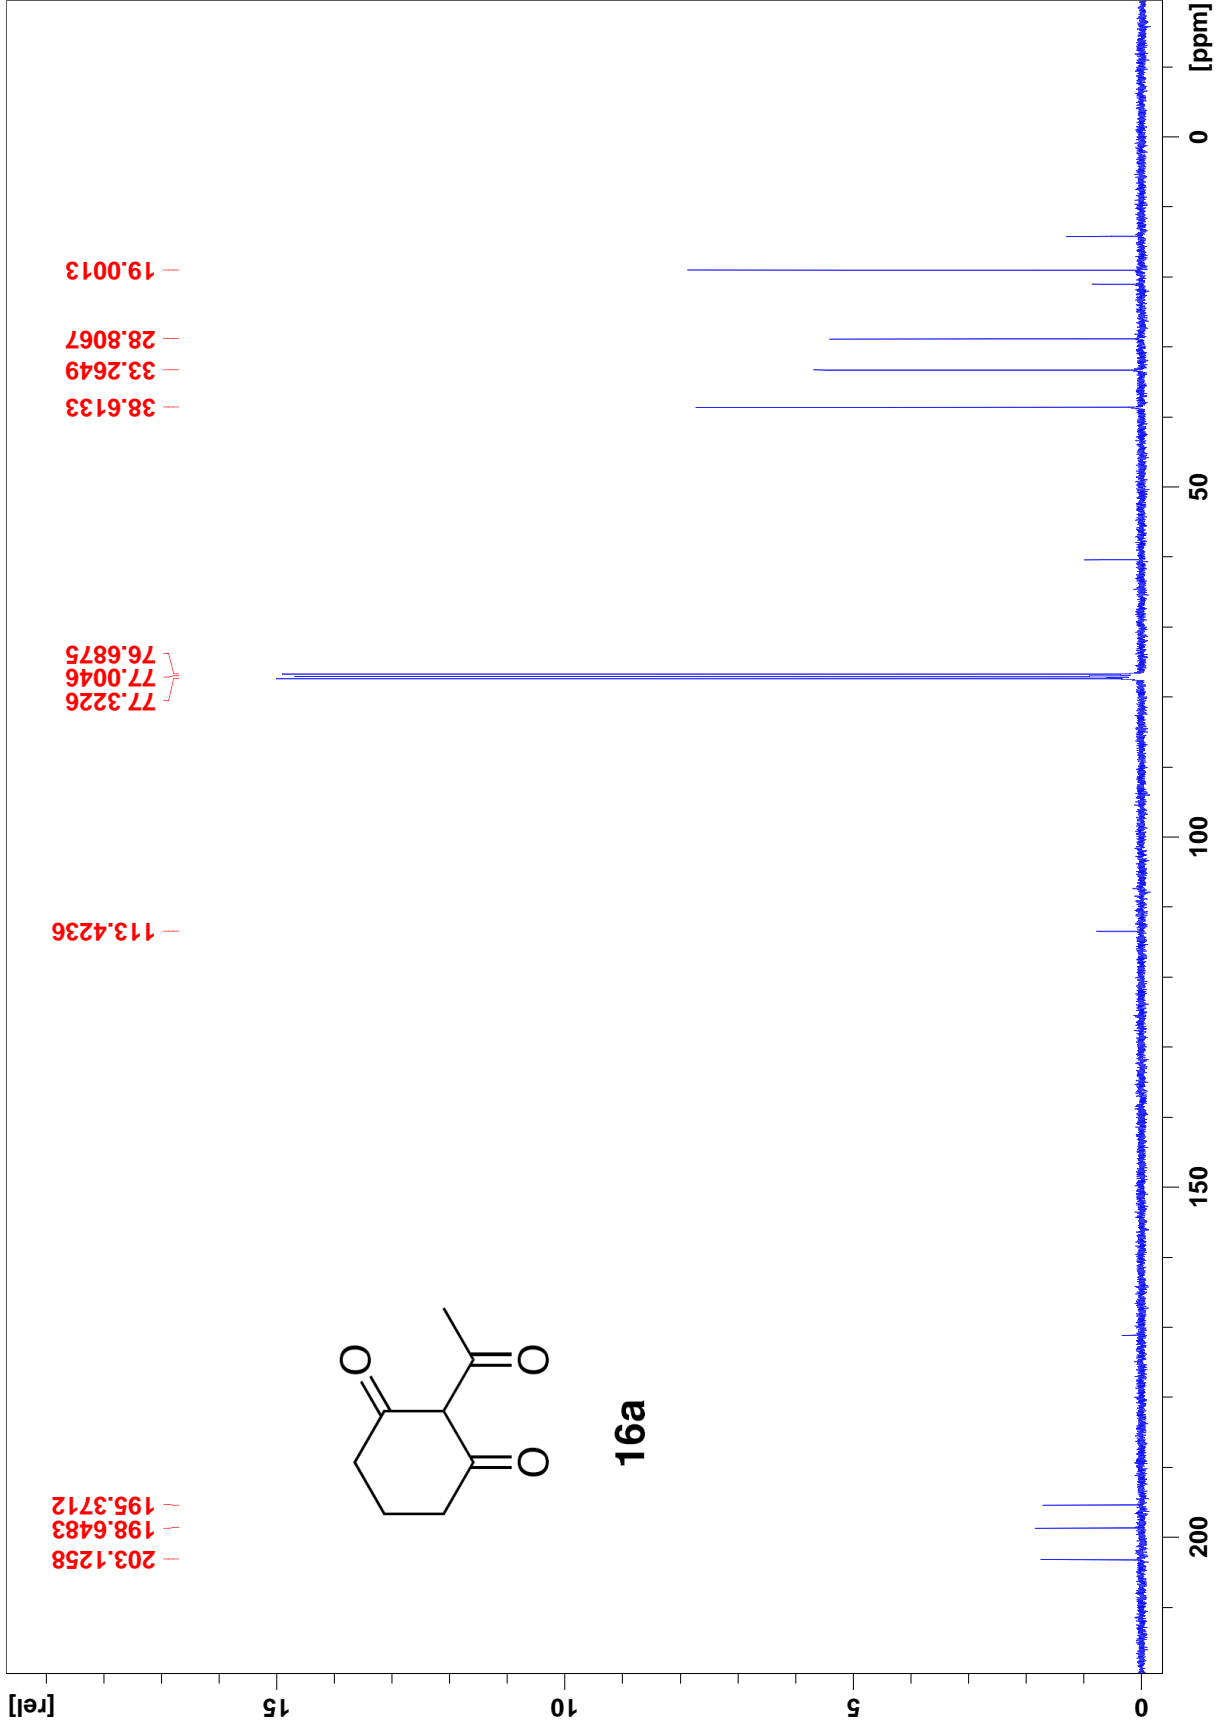

# 1H-NMR

JL08-120108 1 1 C:\Bruker\TOPSPIN leex3451

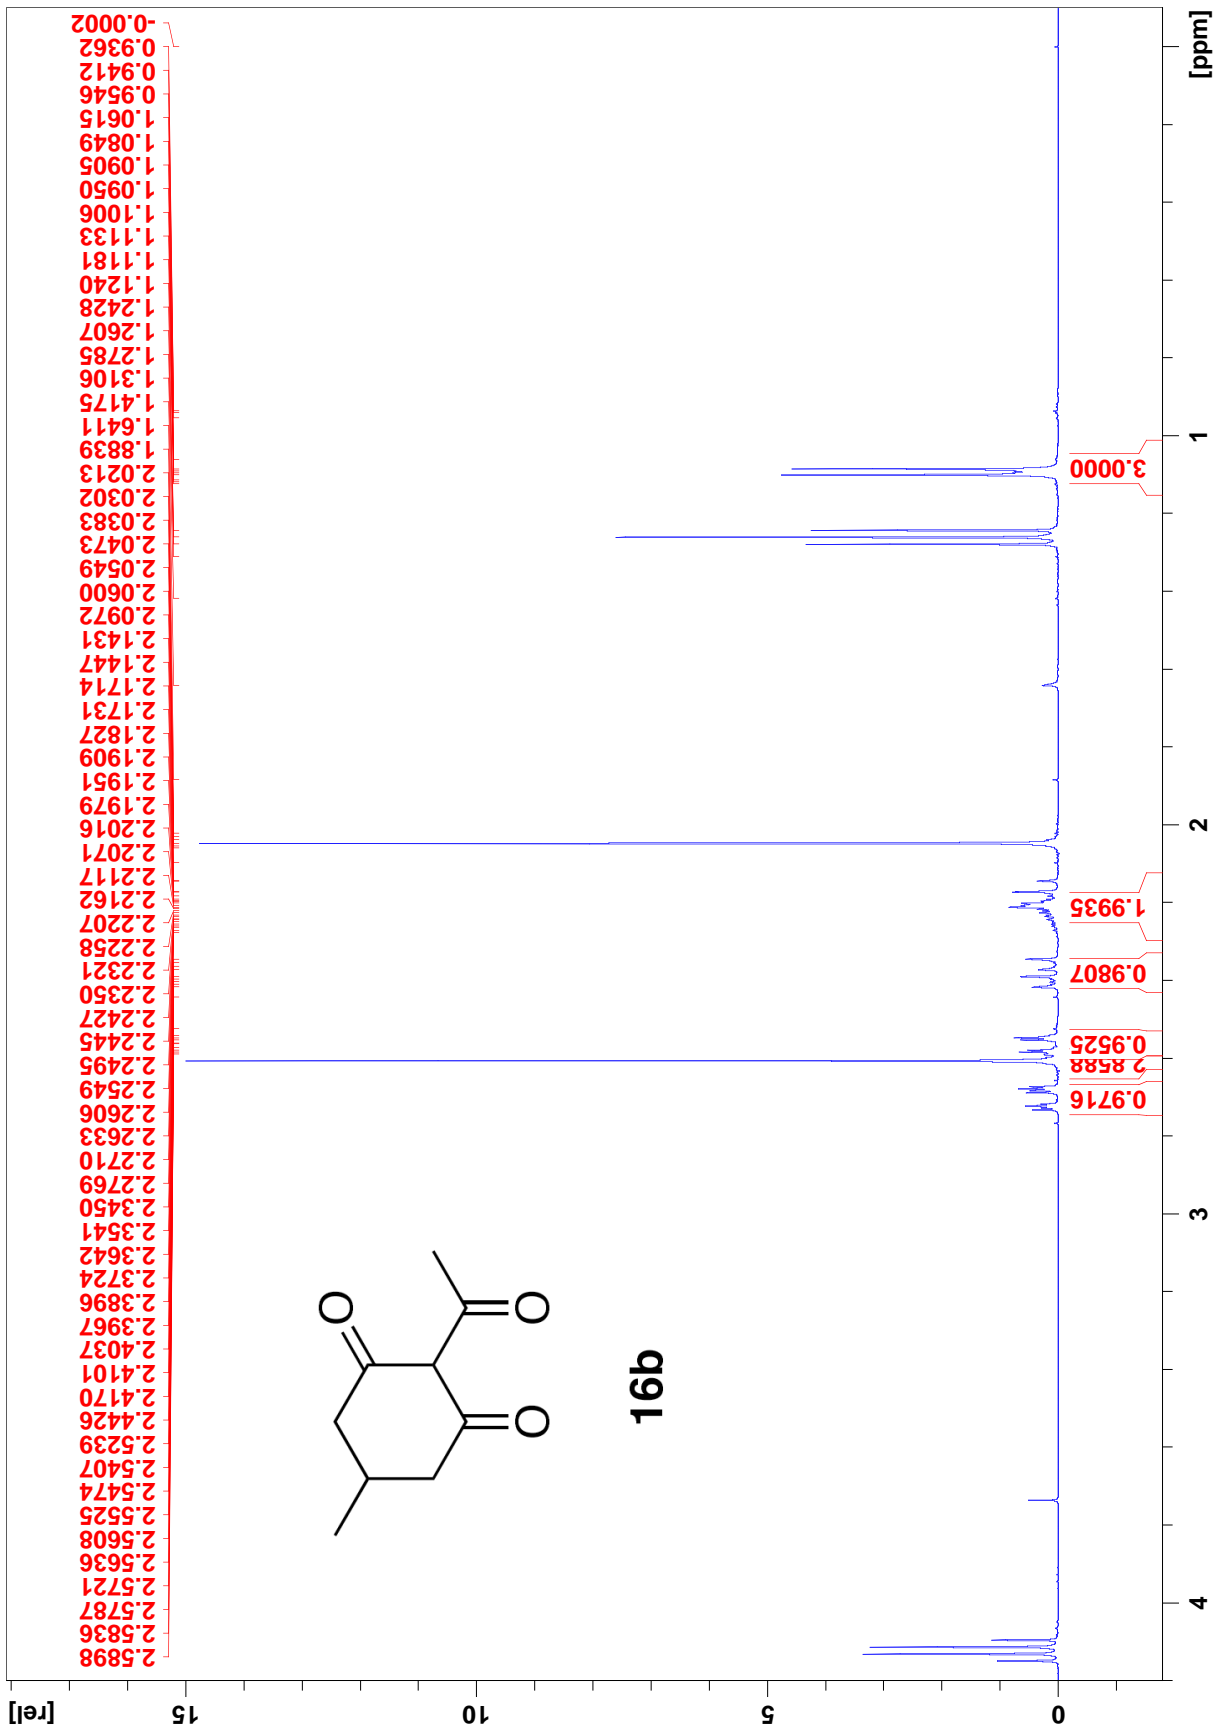

# 13C-NMR

JL08-120108 7 1 C:\Bruker\TOPSPIN leex3451

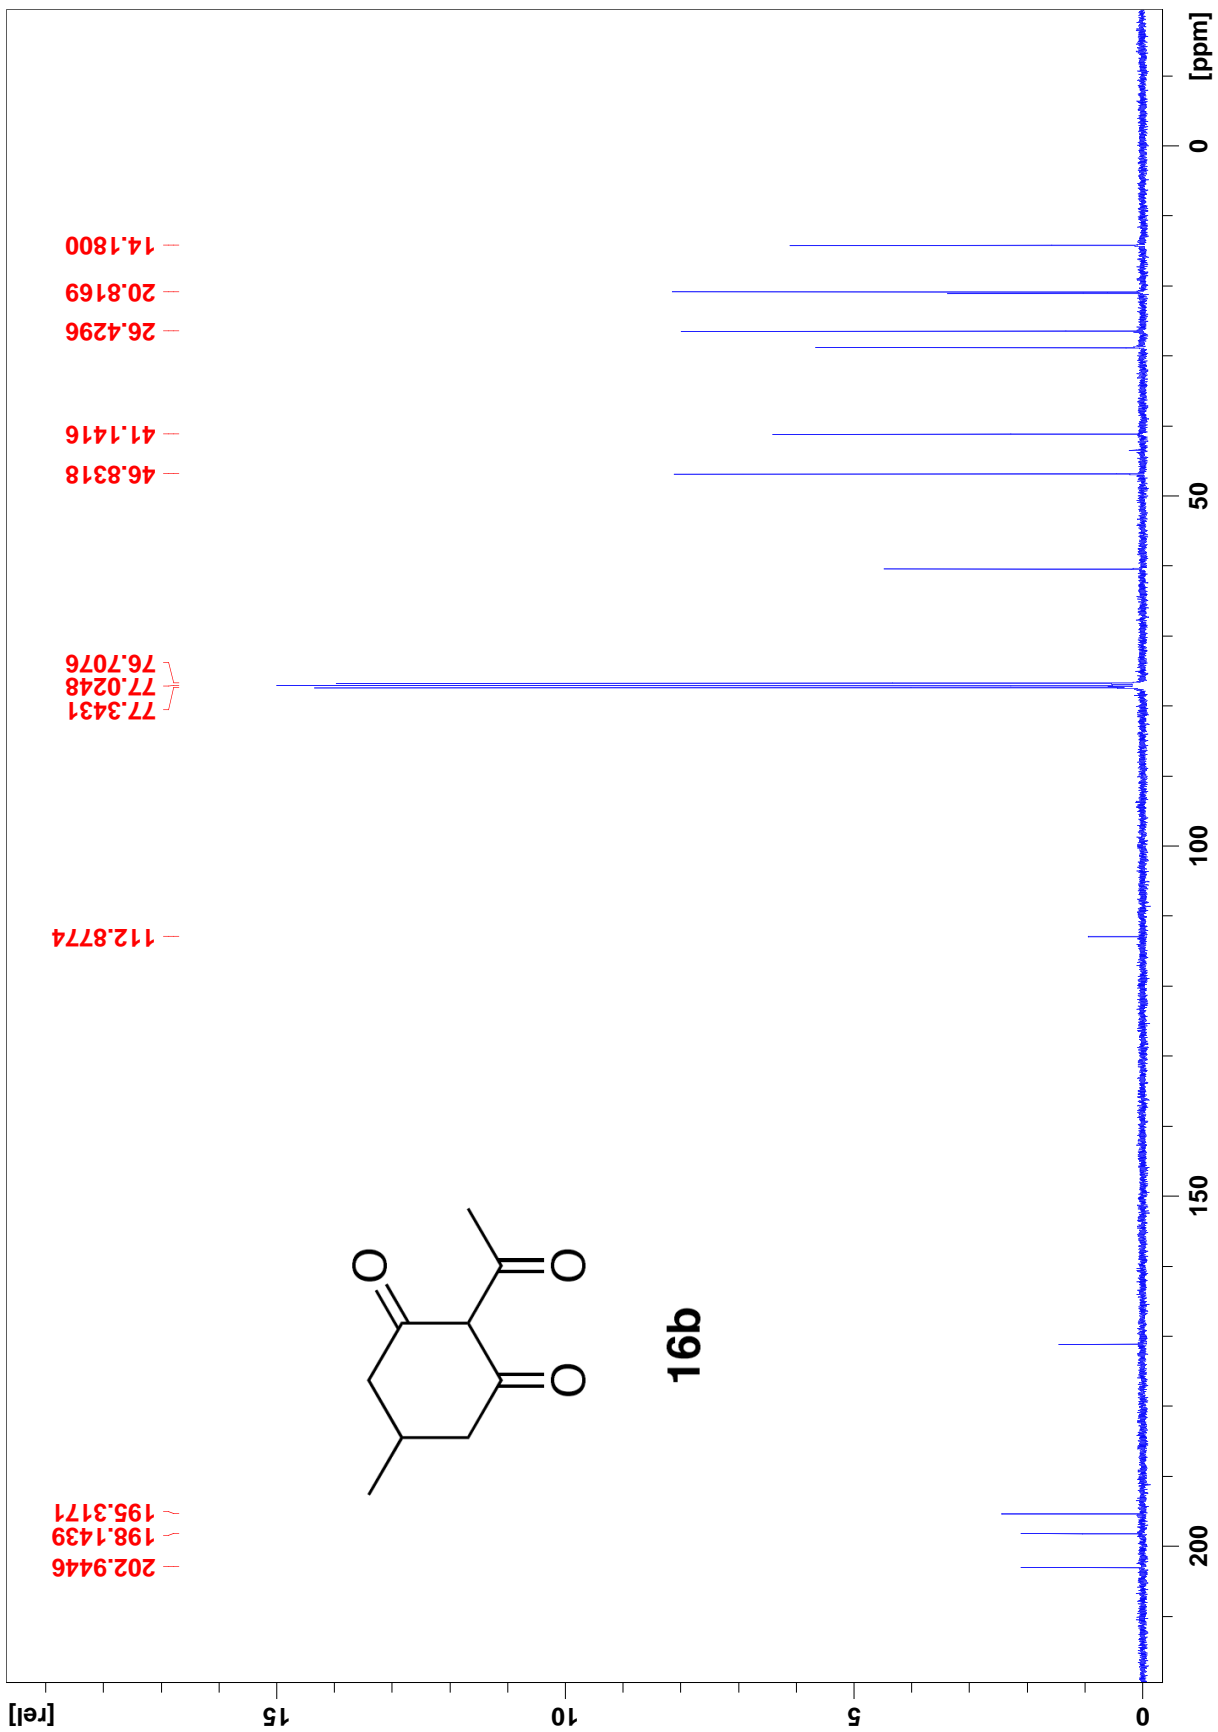

# 1H-NMR

JL08-110408 1 1 C:\Bruker\TOPSPIN leex3451

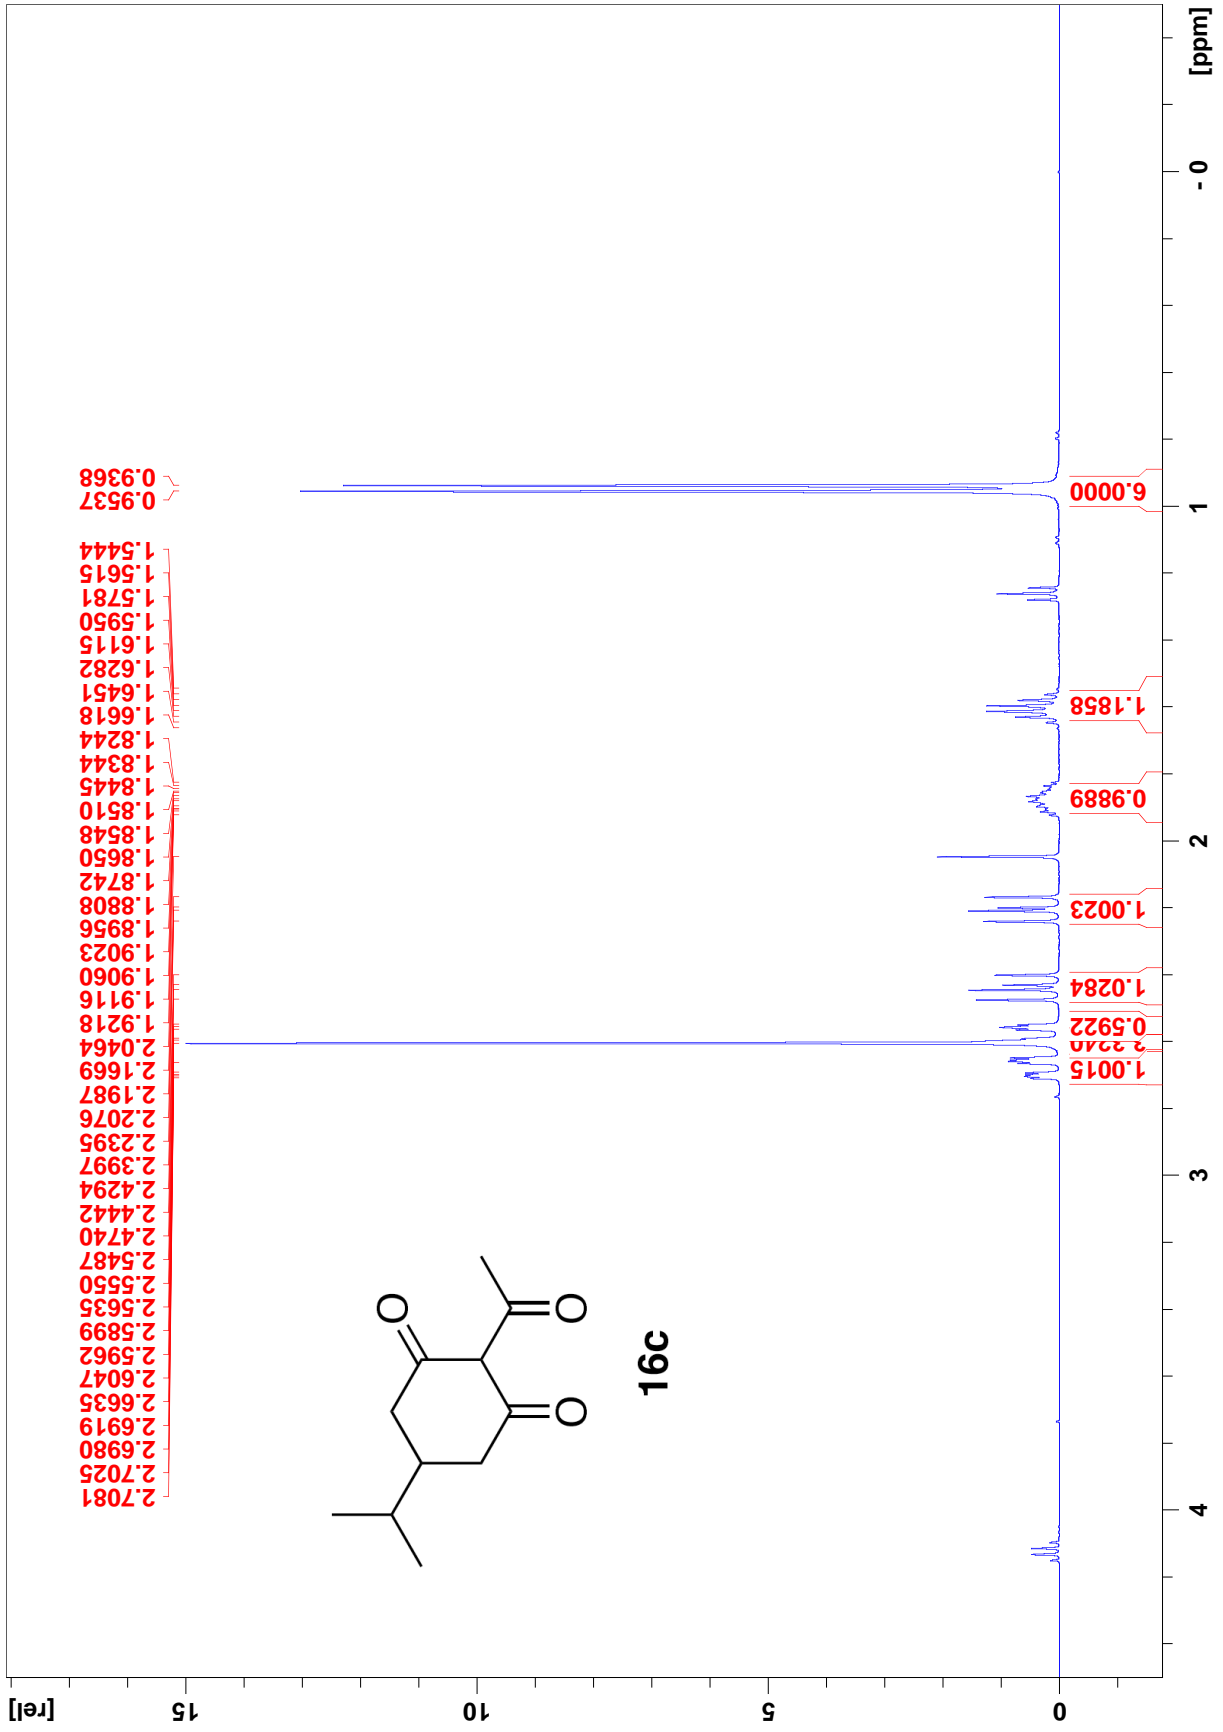

# 13C-NMR

JL08-110408 3 1 C:\Bruker\TOPSPIN leex3451

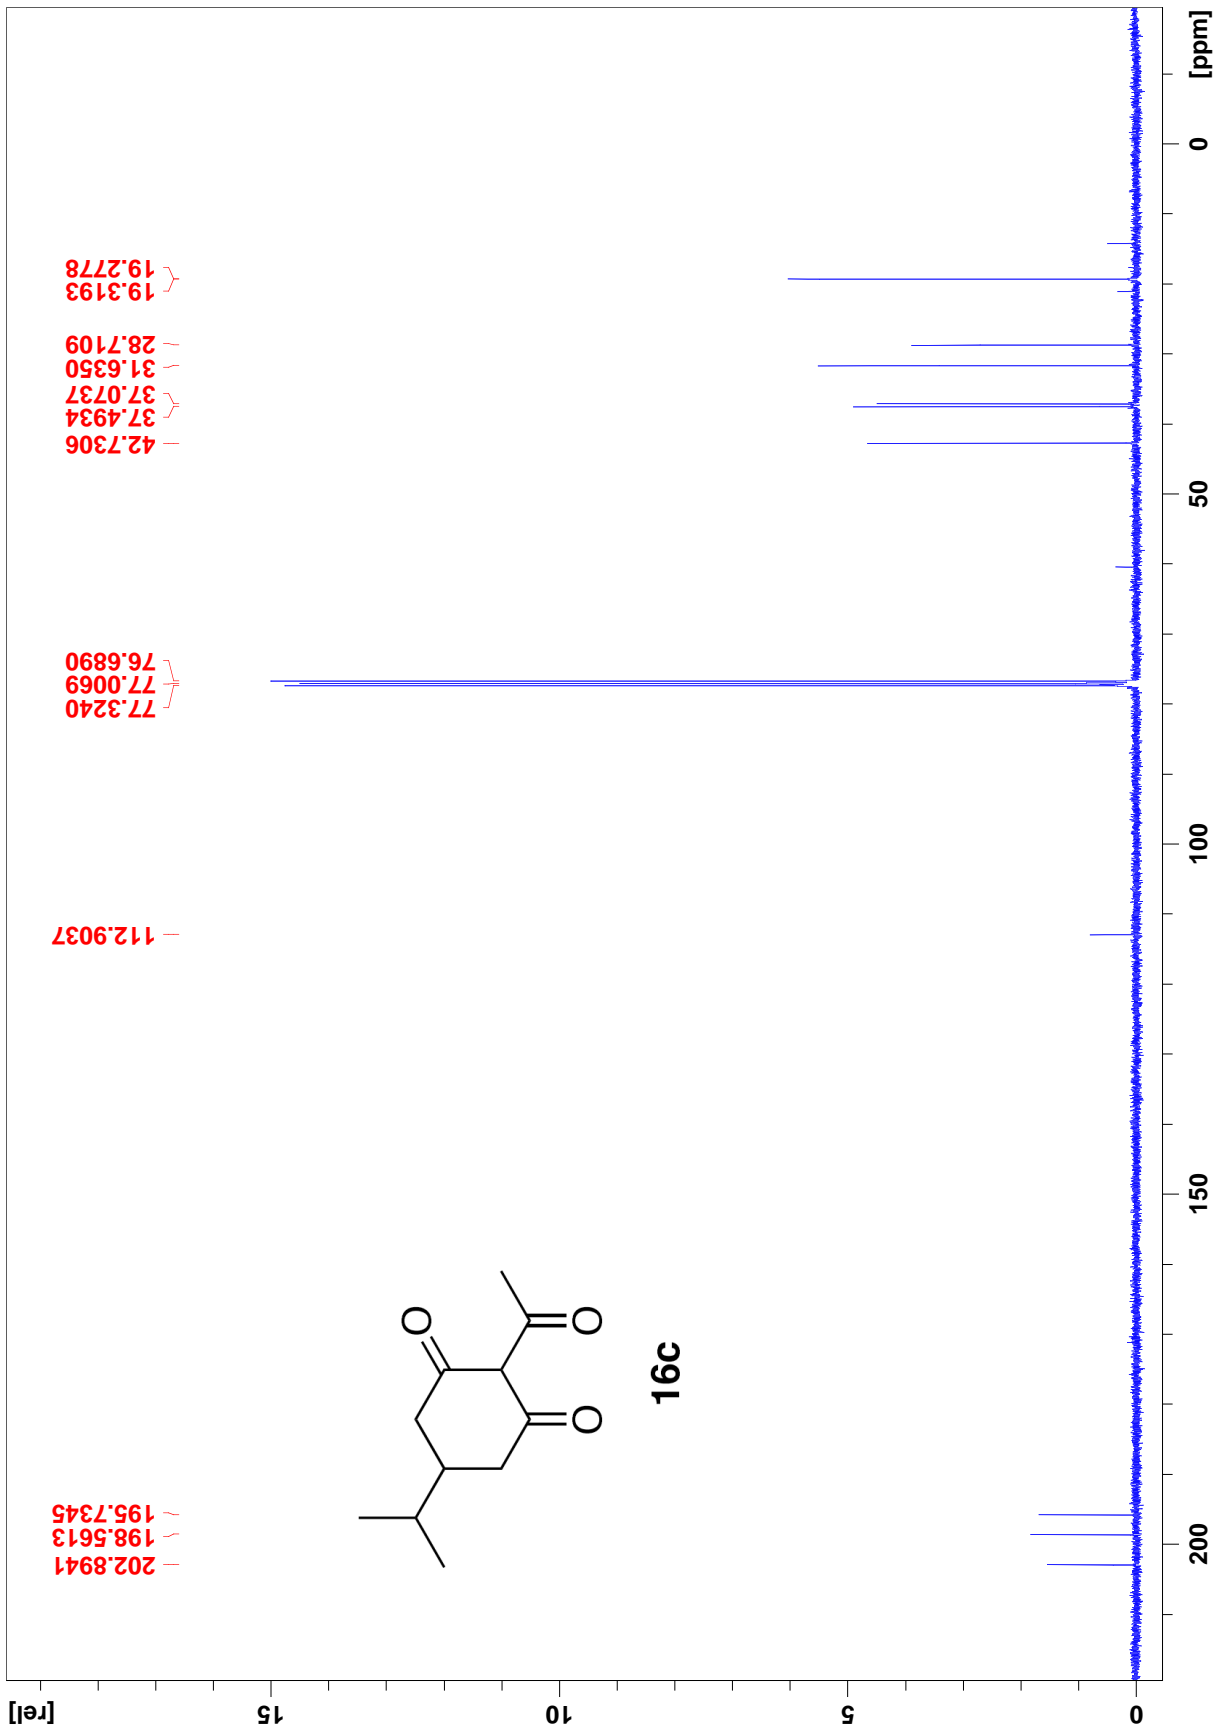

# 1H-NMR

JL08-11.0508 1 1 C:\Bruker\TOPSPIN leex3451

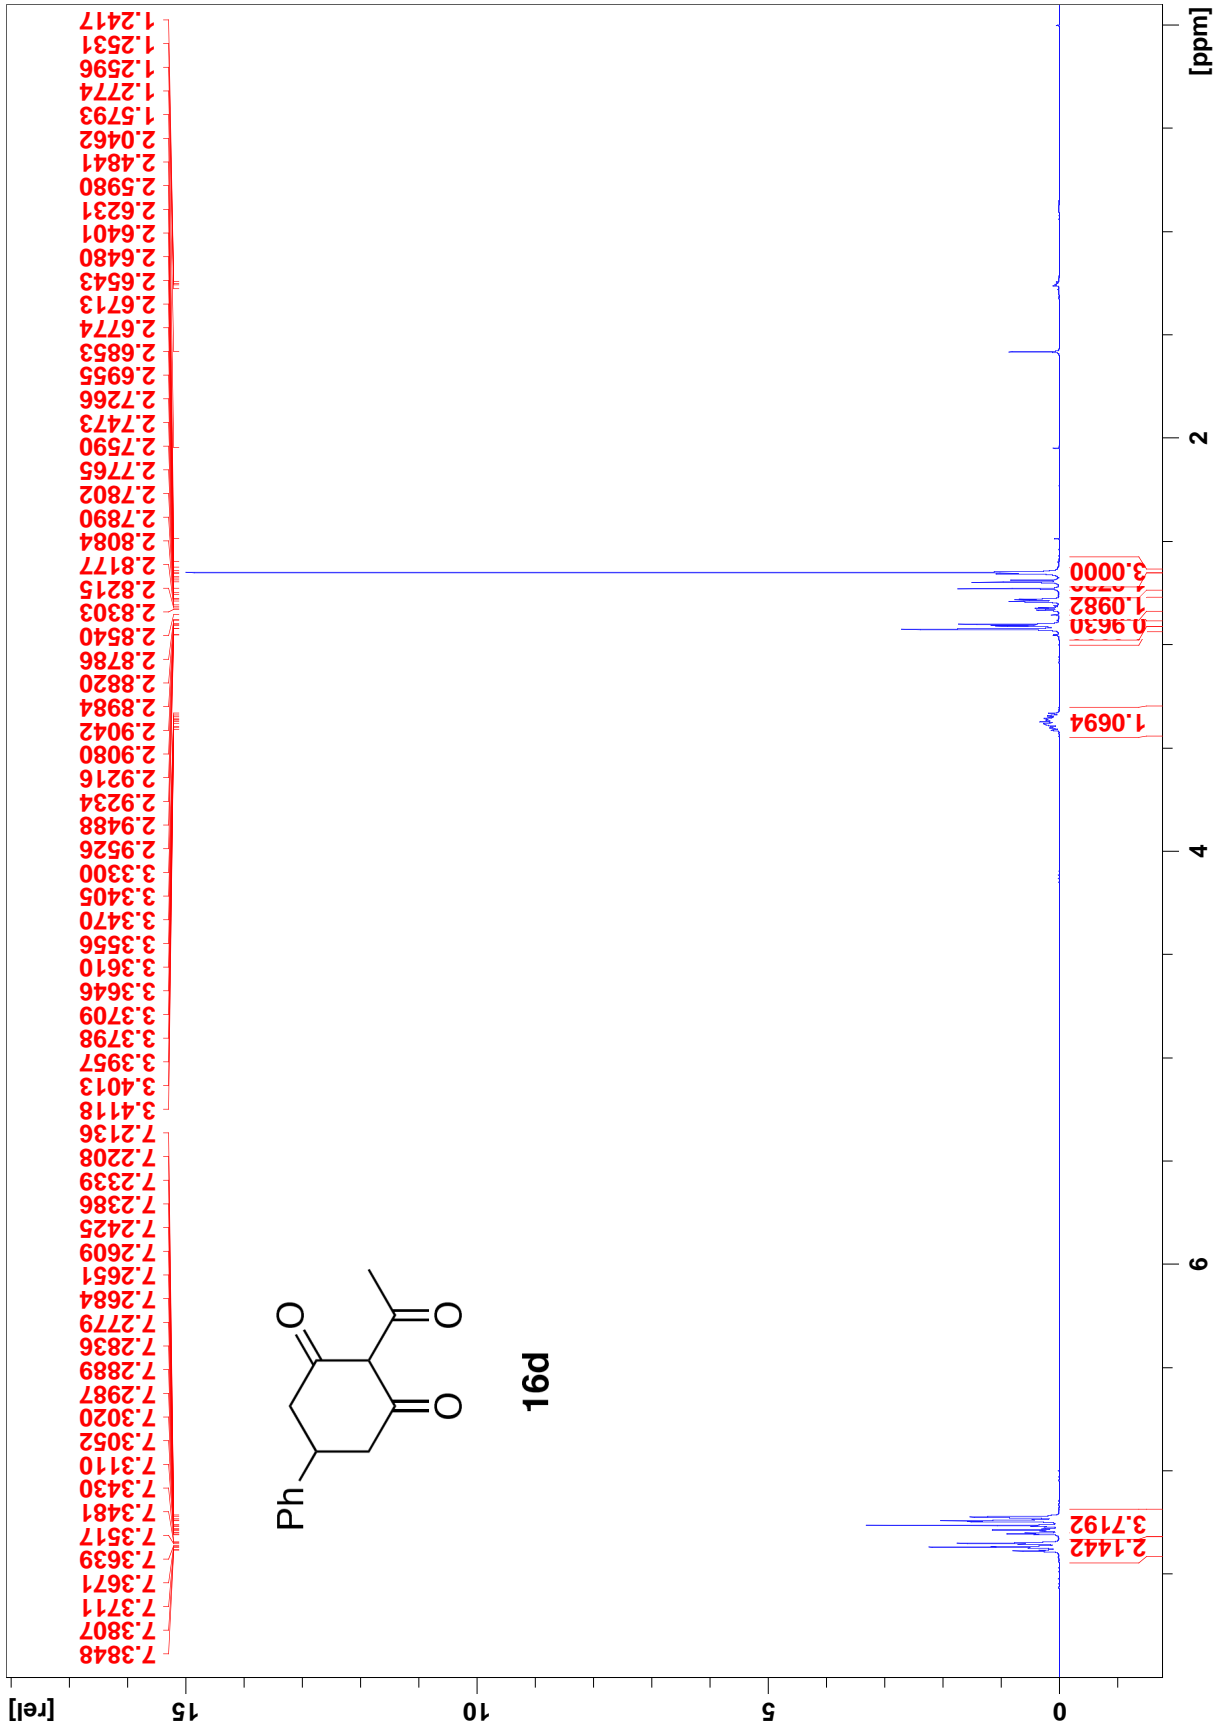

# 13C-NMR

JL08-1110508 3 1 C:\Bruker\TOPSPIN leex3451

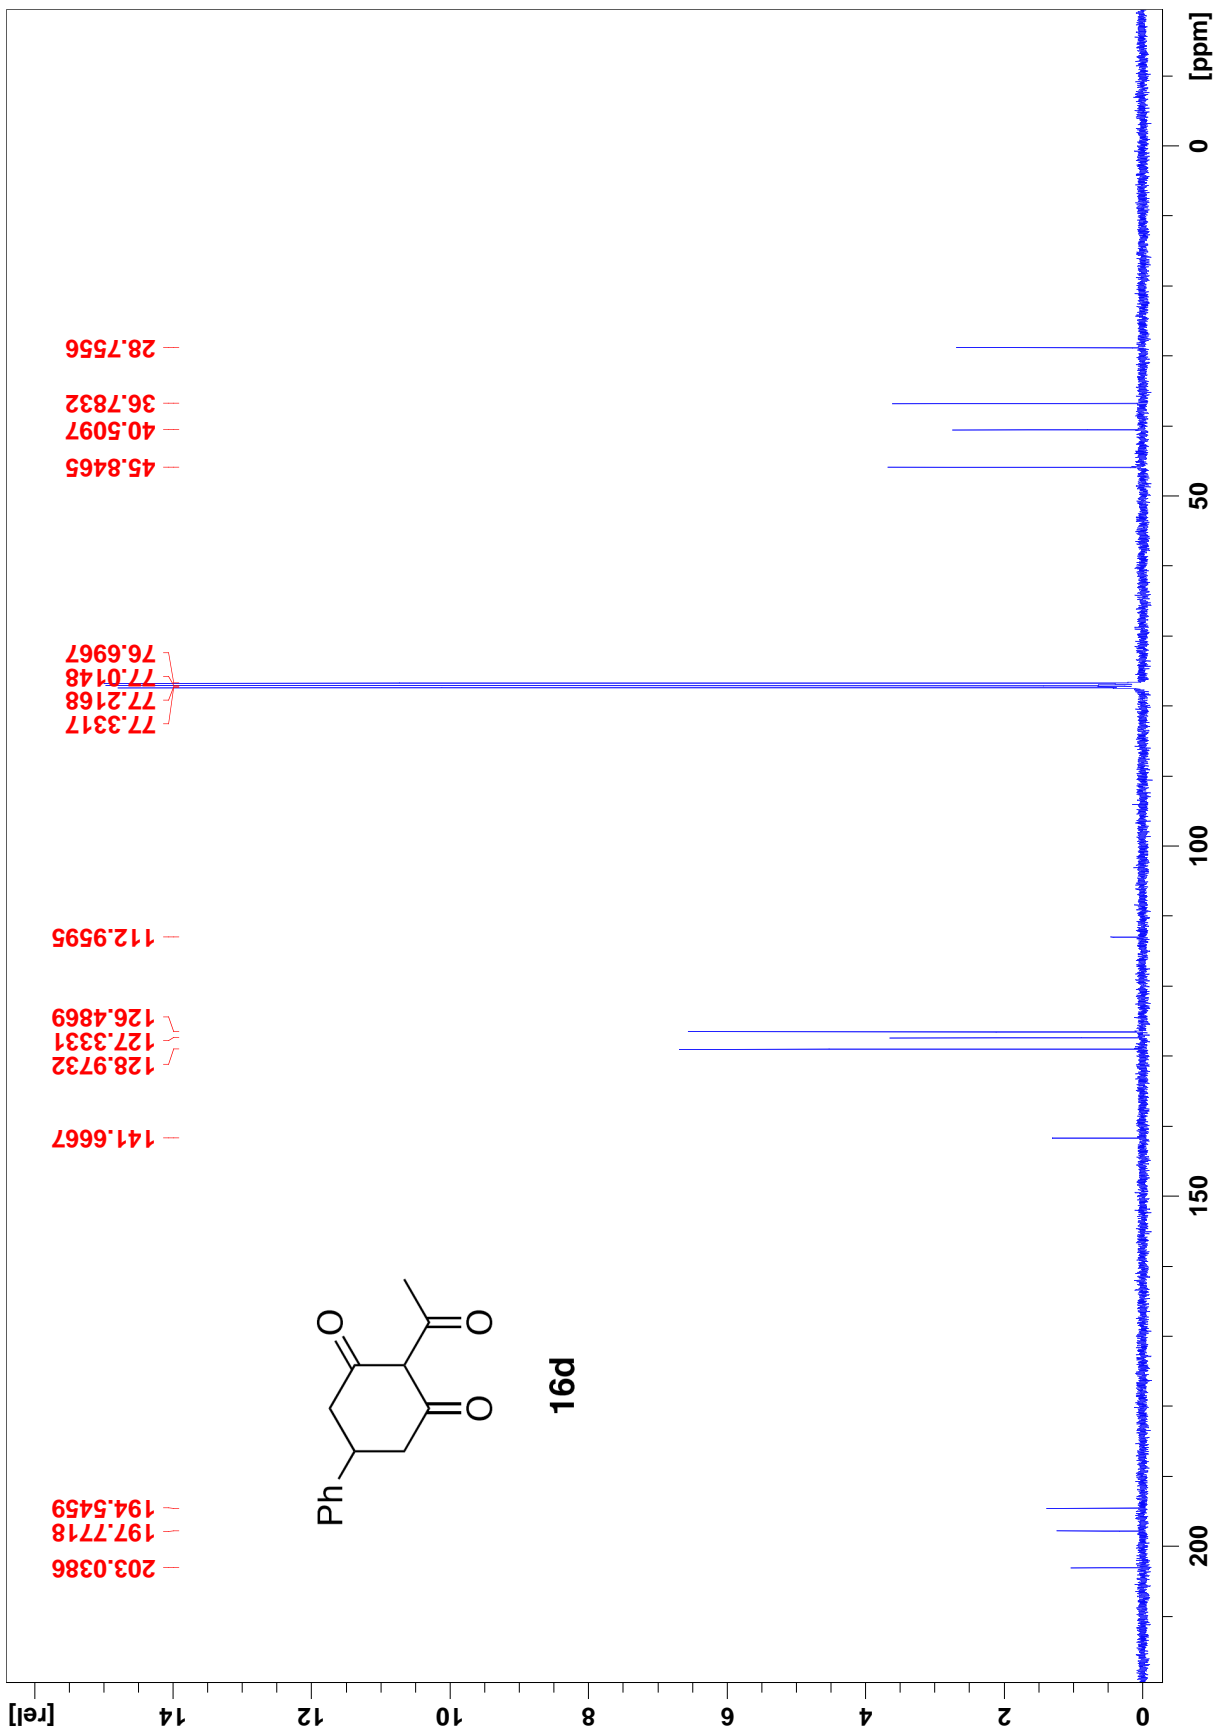

# 1H-NMR

JL08-1110608 1 1 C:\Bruker\TOPSPIN leex3451

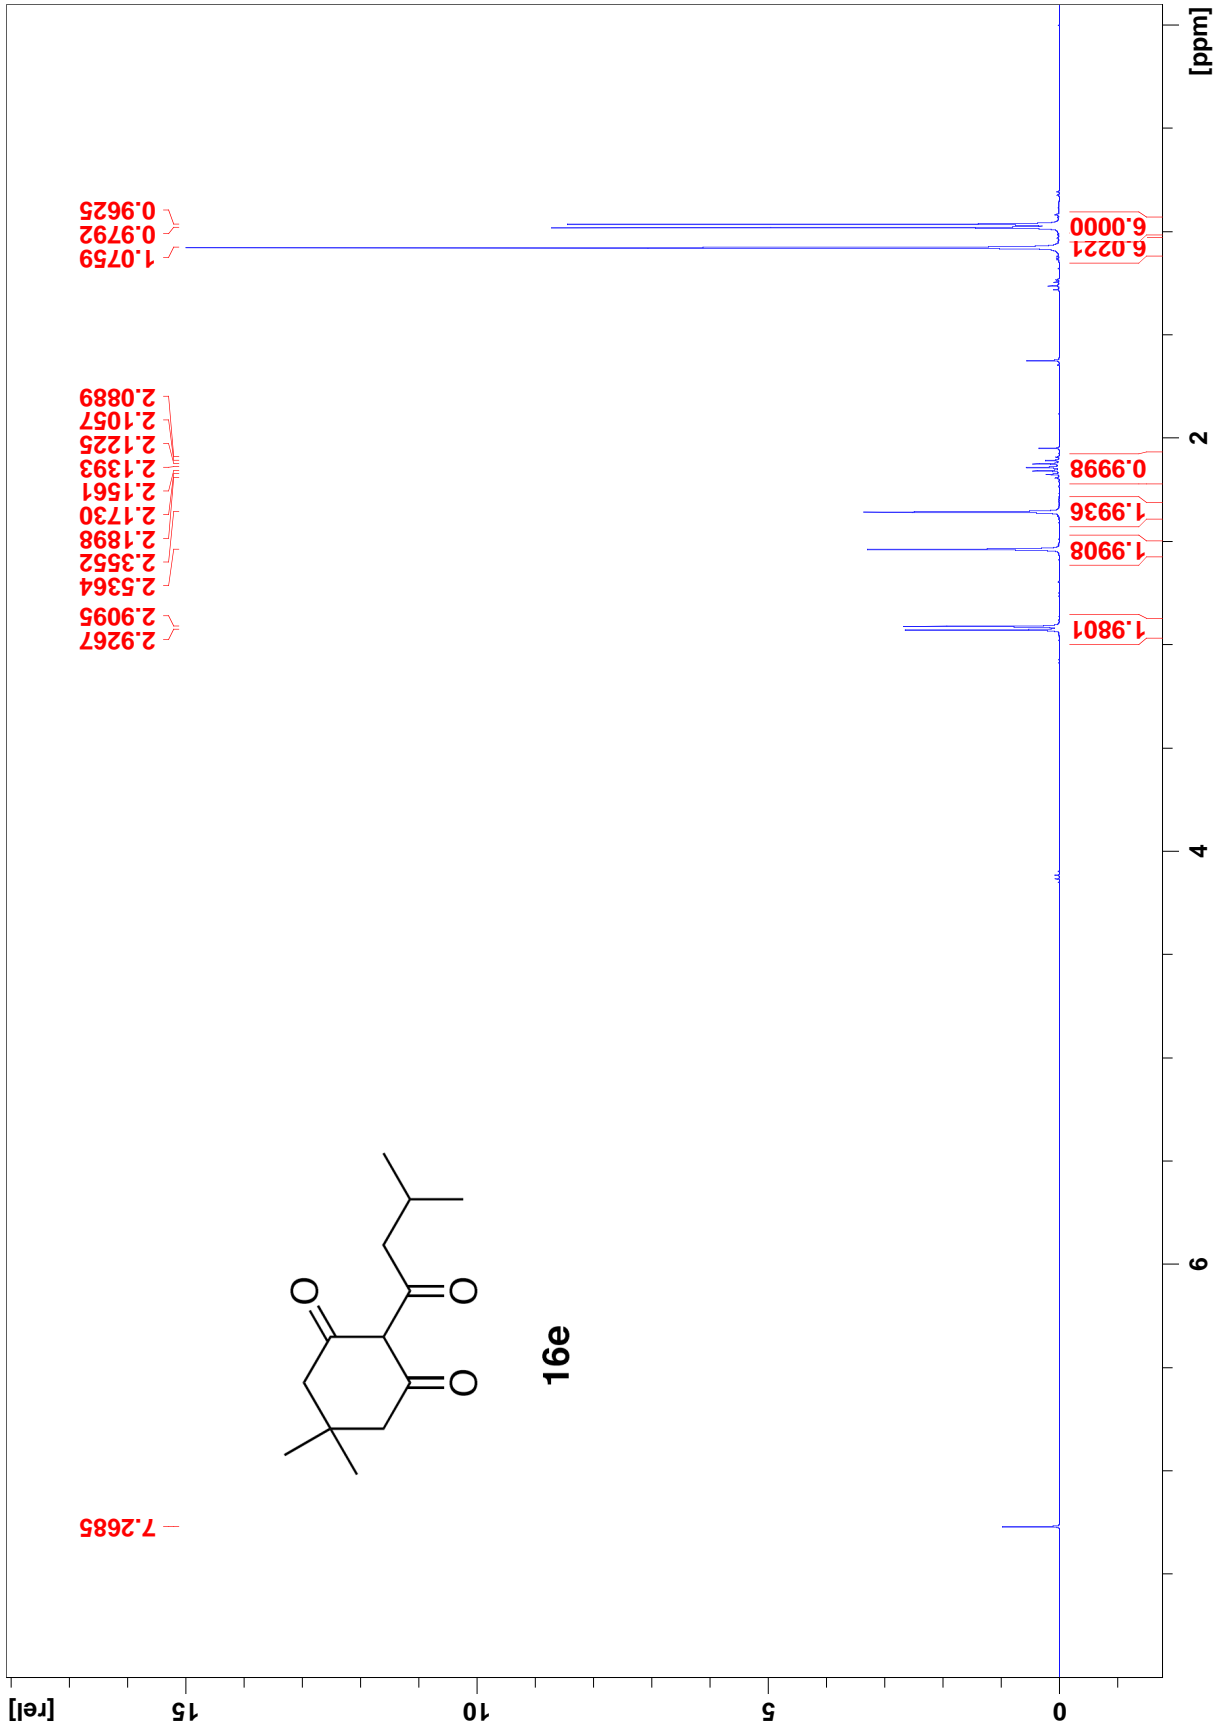



# 13C-NMR

JL08-1110608 3 1 C:\Bruker\TOPSPIN leex3451

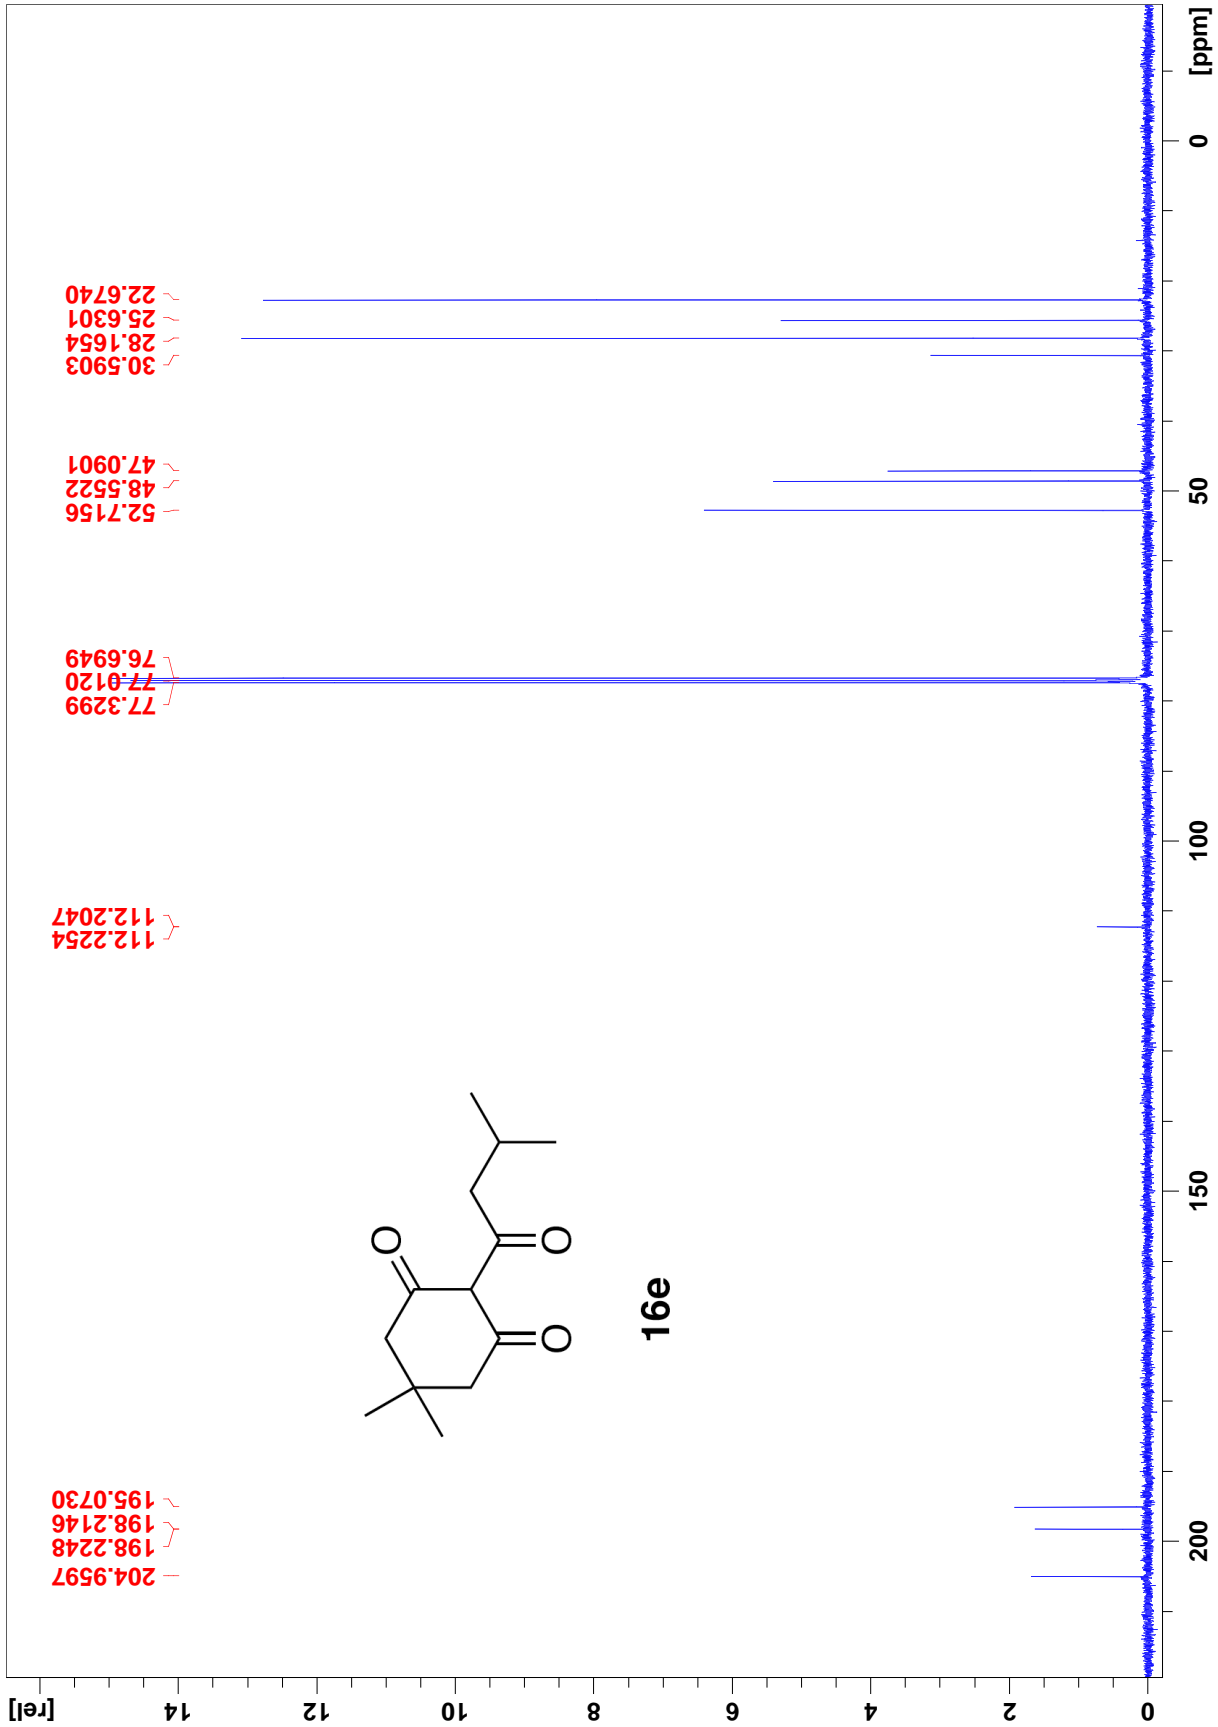

# 1H-NMR

JL08-111908A 1 1 C:\Bruker\TOPSPIN leex3451

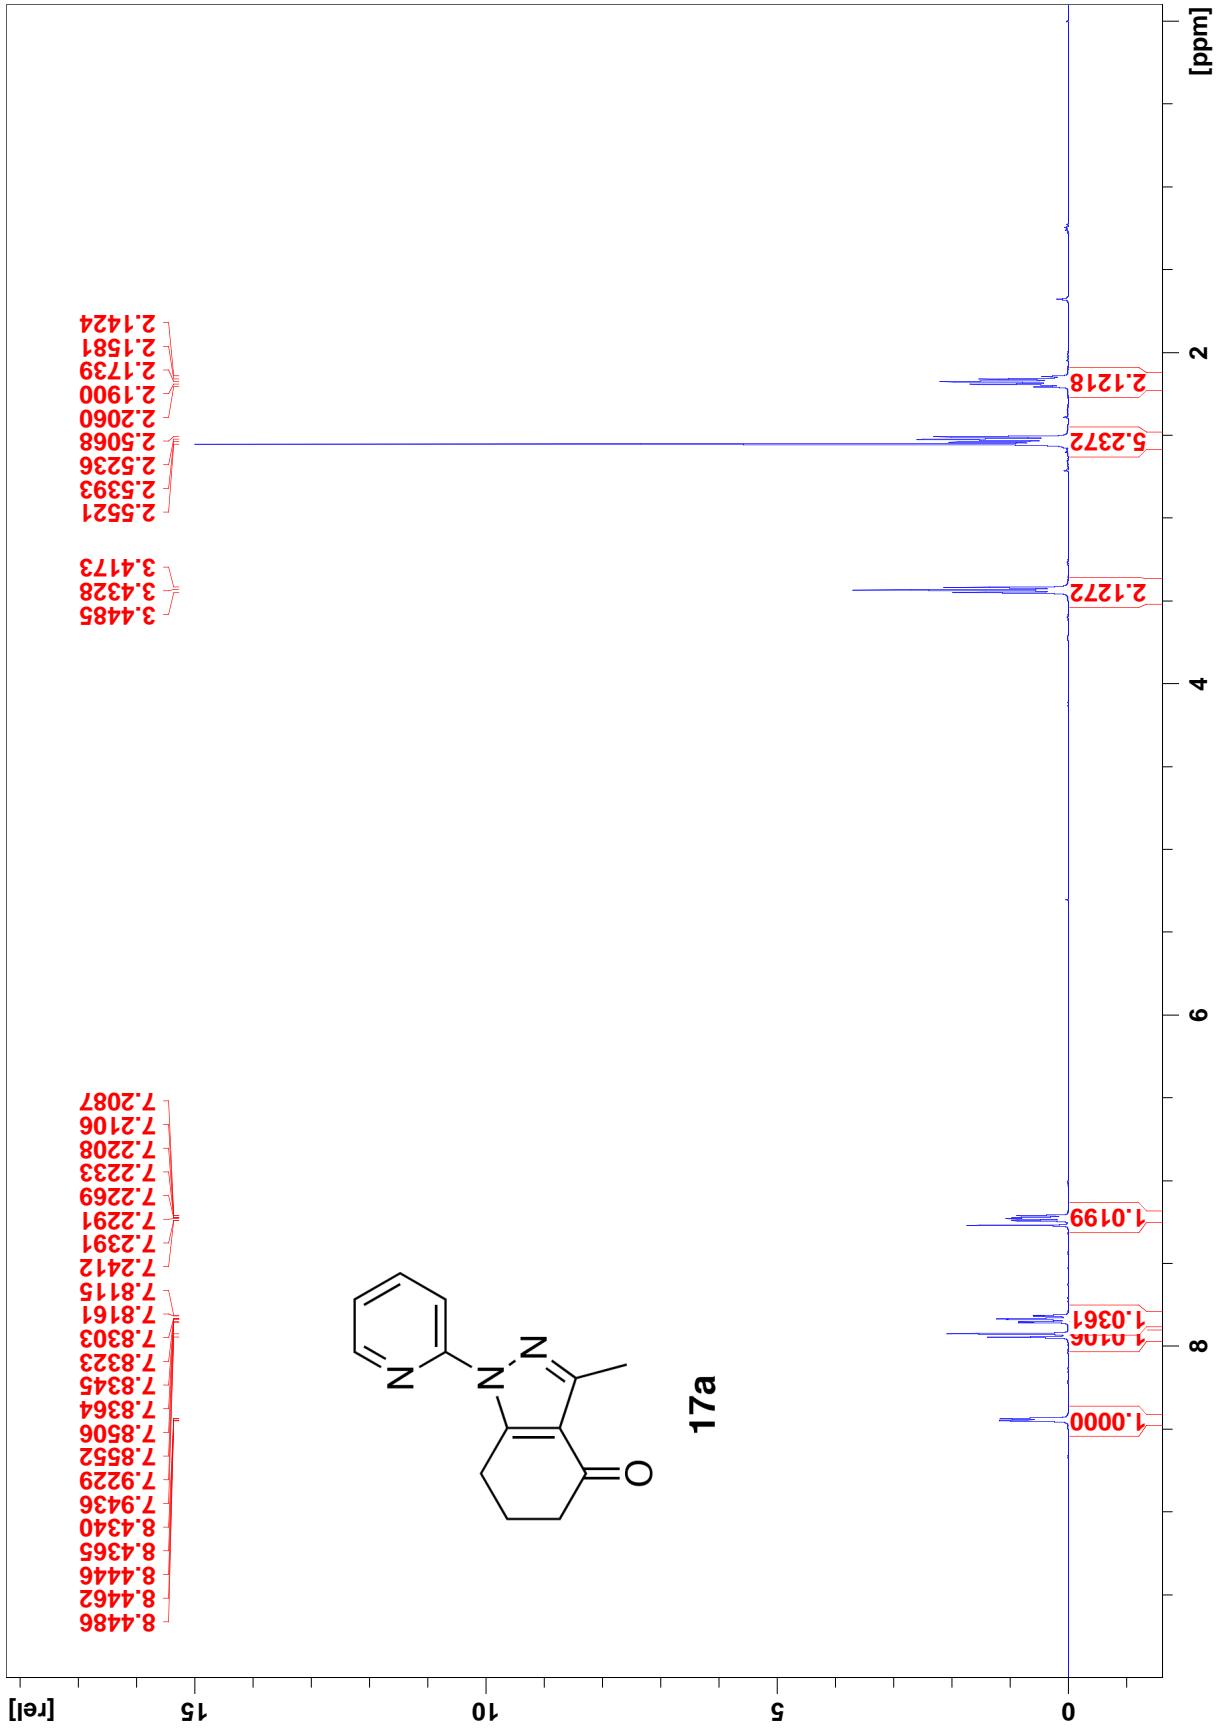

# 13C-NMR

JL08-111908A 3 1 C:\Bruker\TOPSPIN leex3451

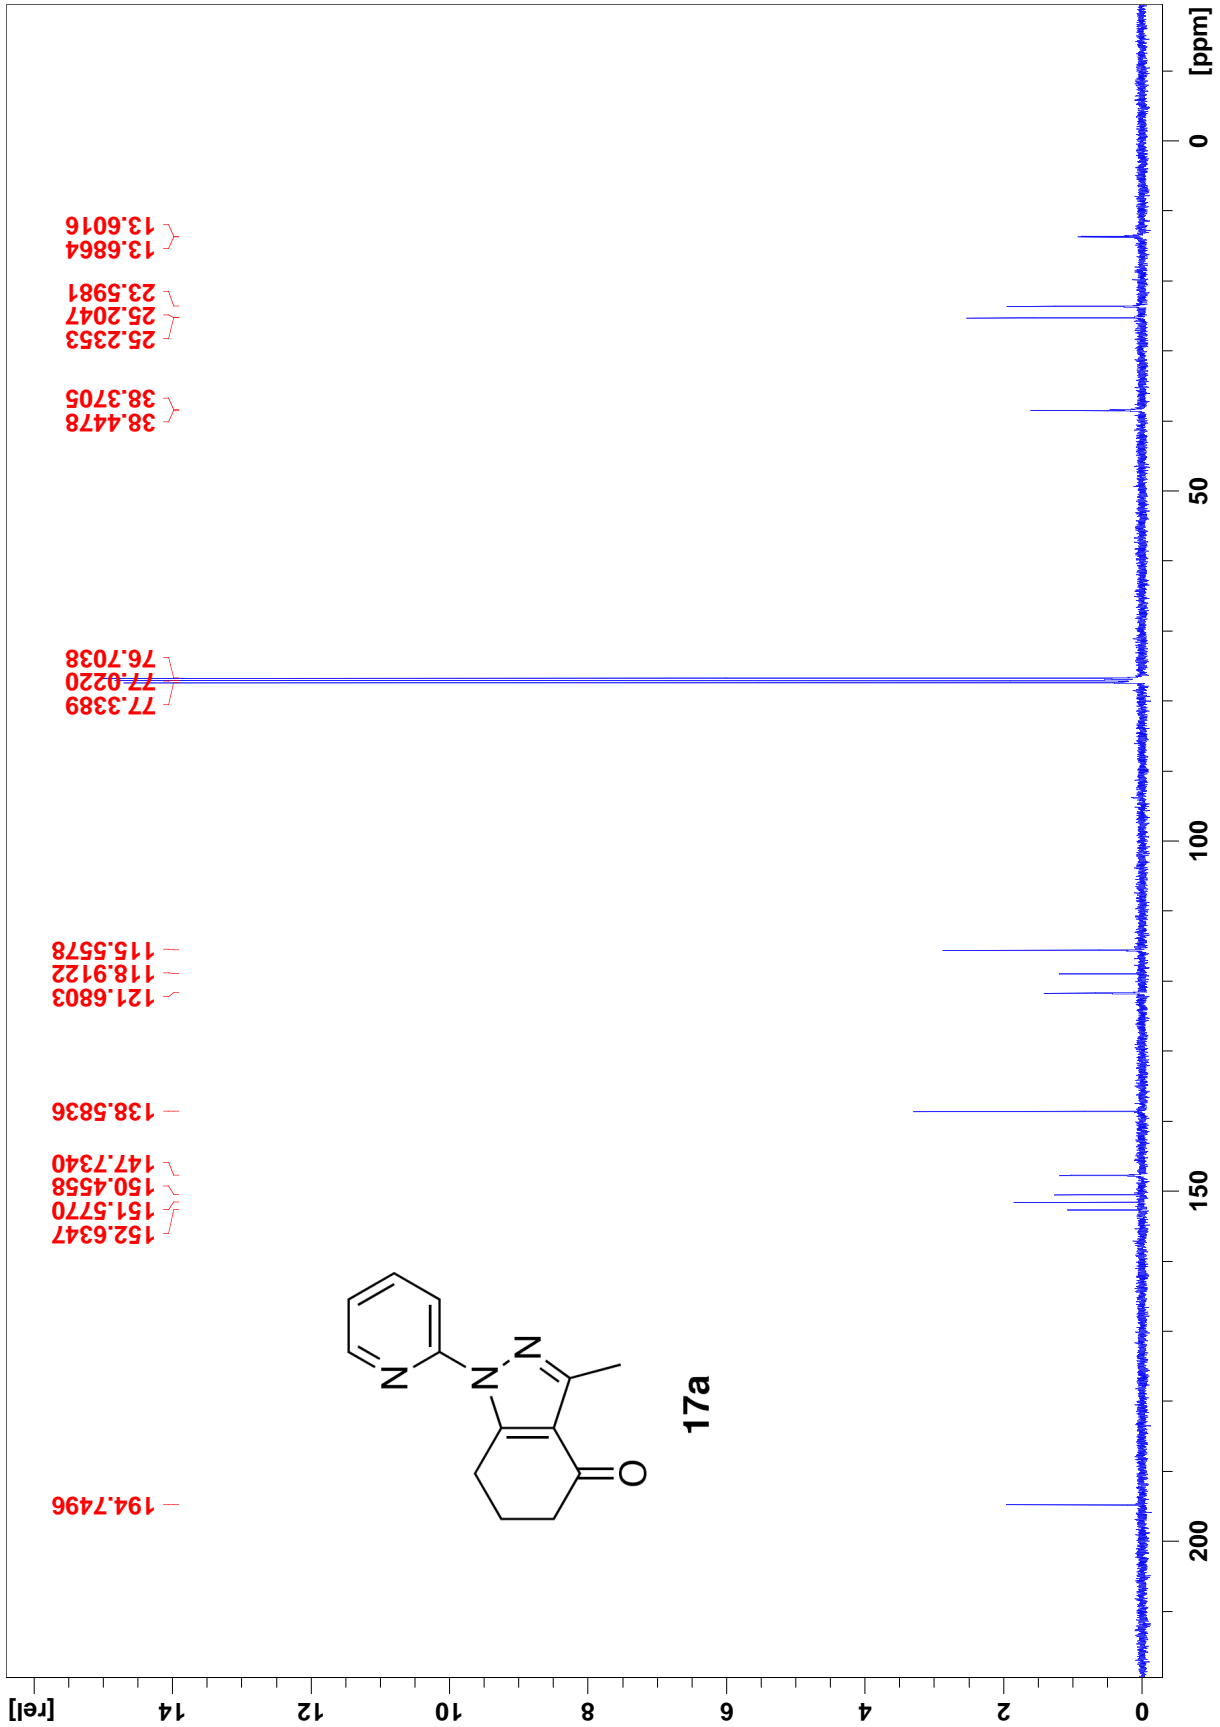

# <sup>1</sup>H-NMR

JL08-121208 1 1 C:\Bruker\TOPSPIN leex3451

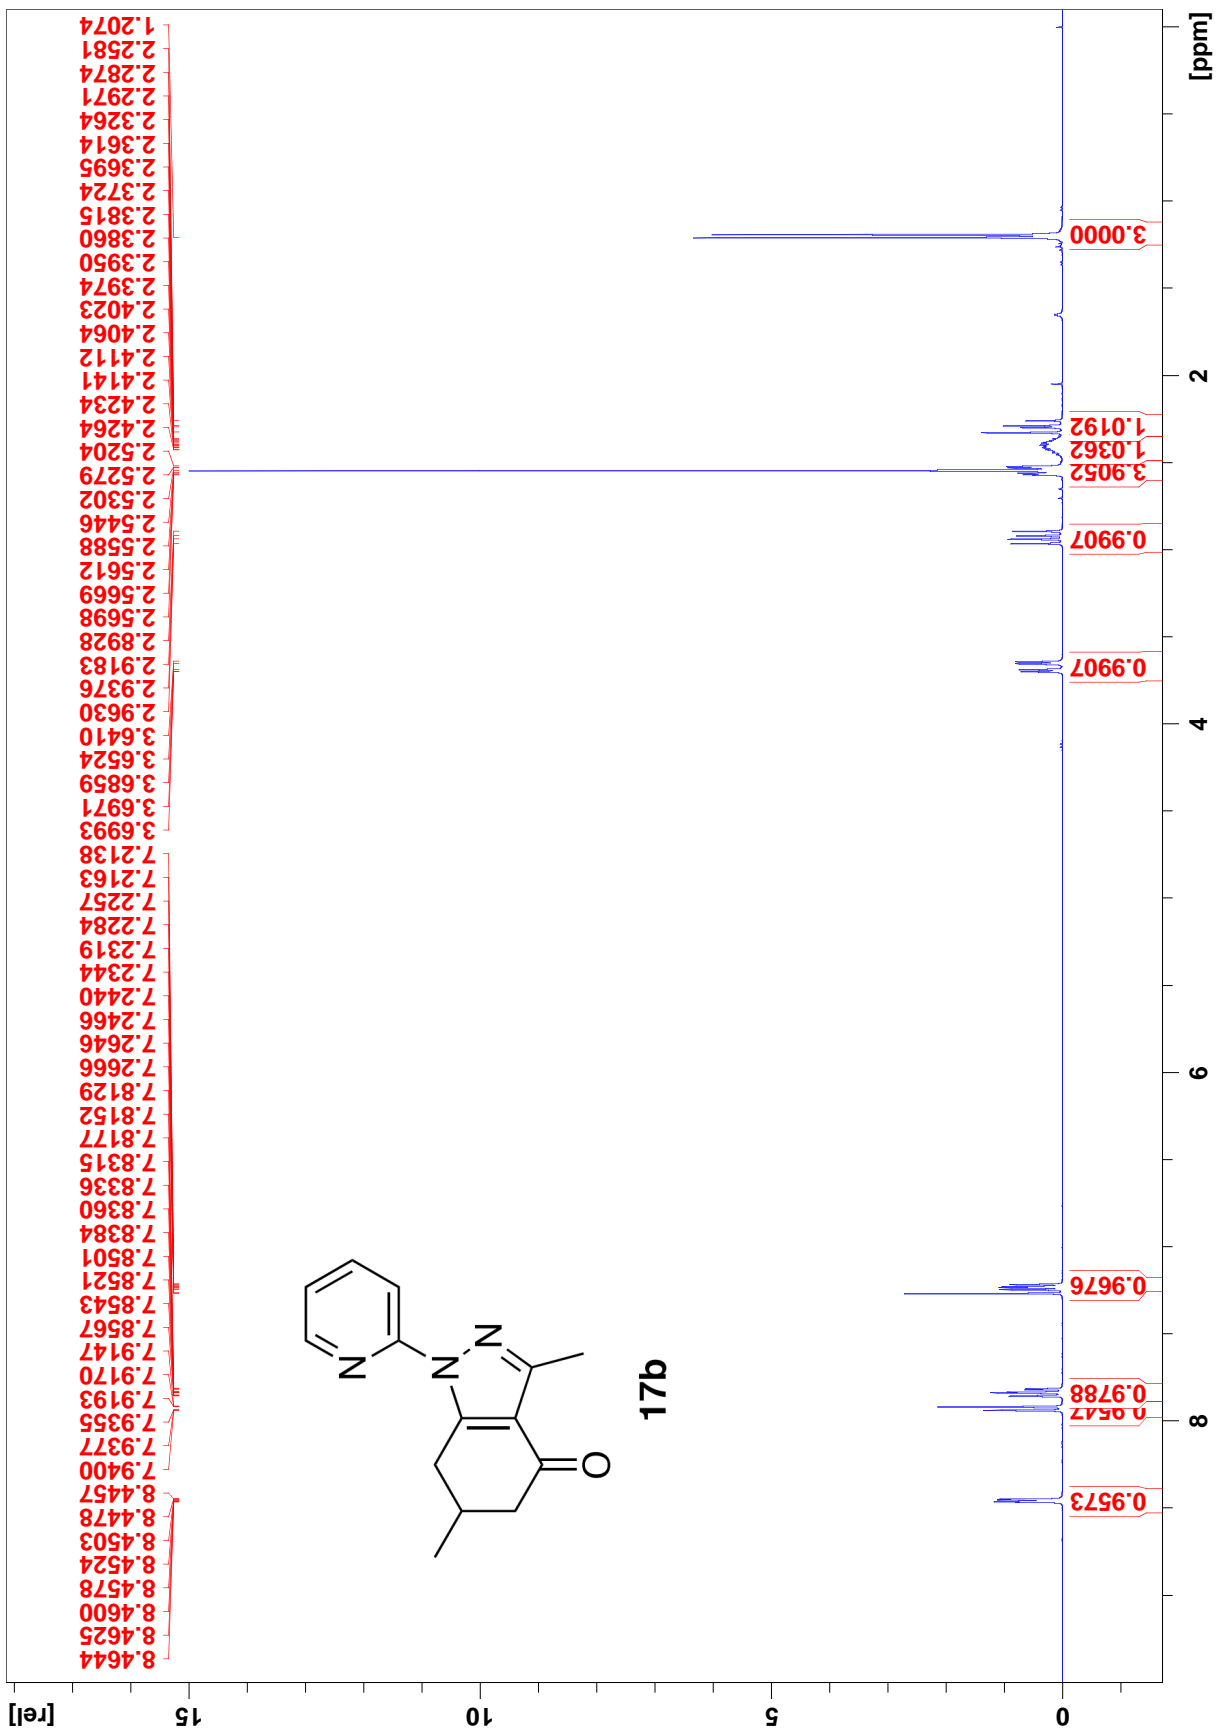

# 13C-NMR

JL08-121208 3 1 C:\Bruker\TOPSPIN leex3451

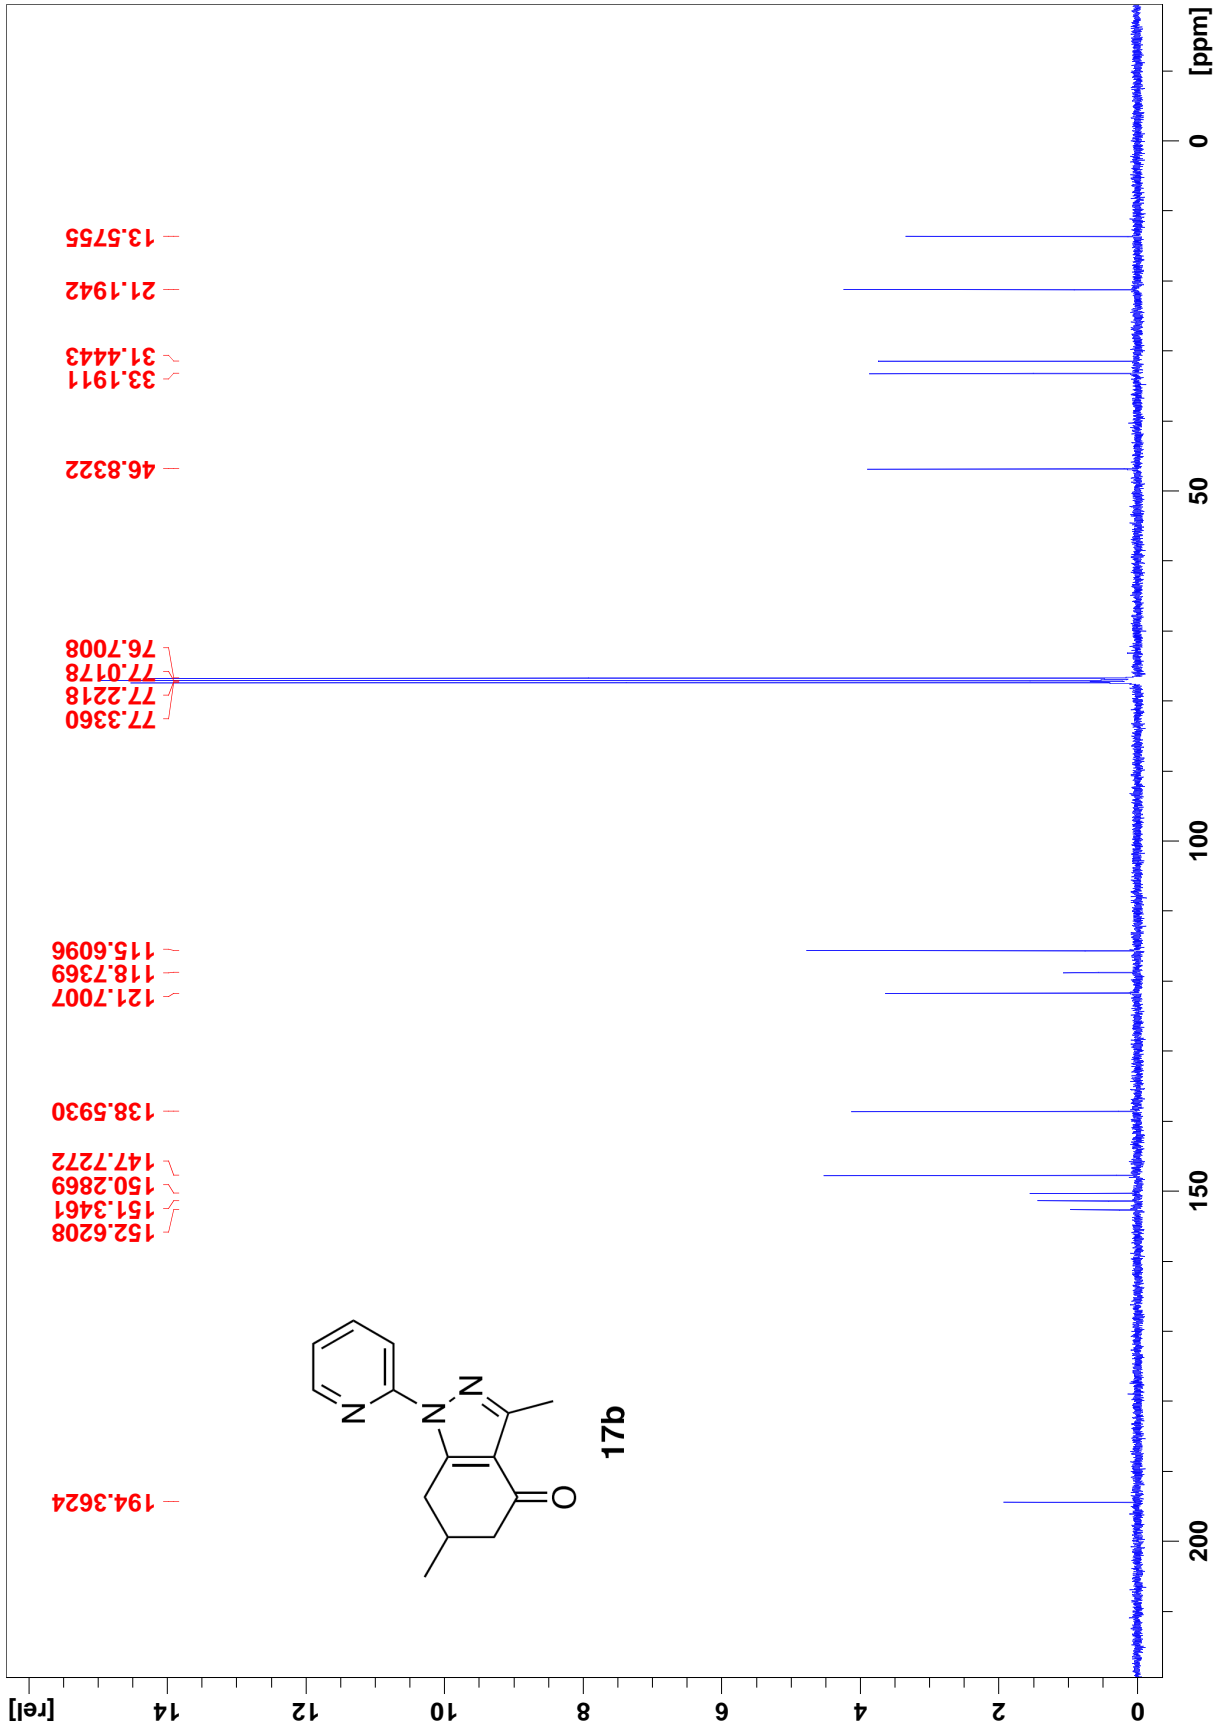

# 1H-NMR

JL08-111908B 1 1 C:\Bruker\TOPSPIN leex3451

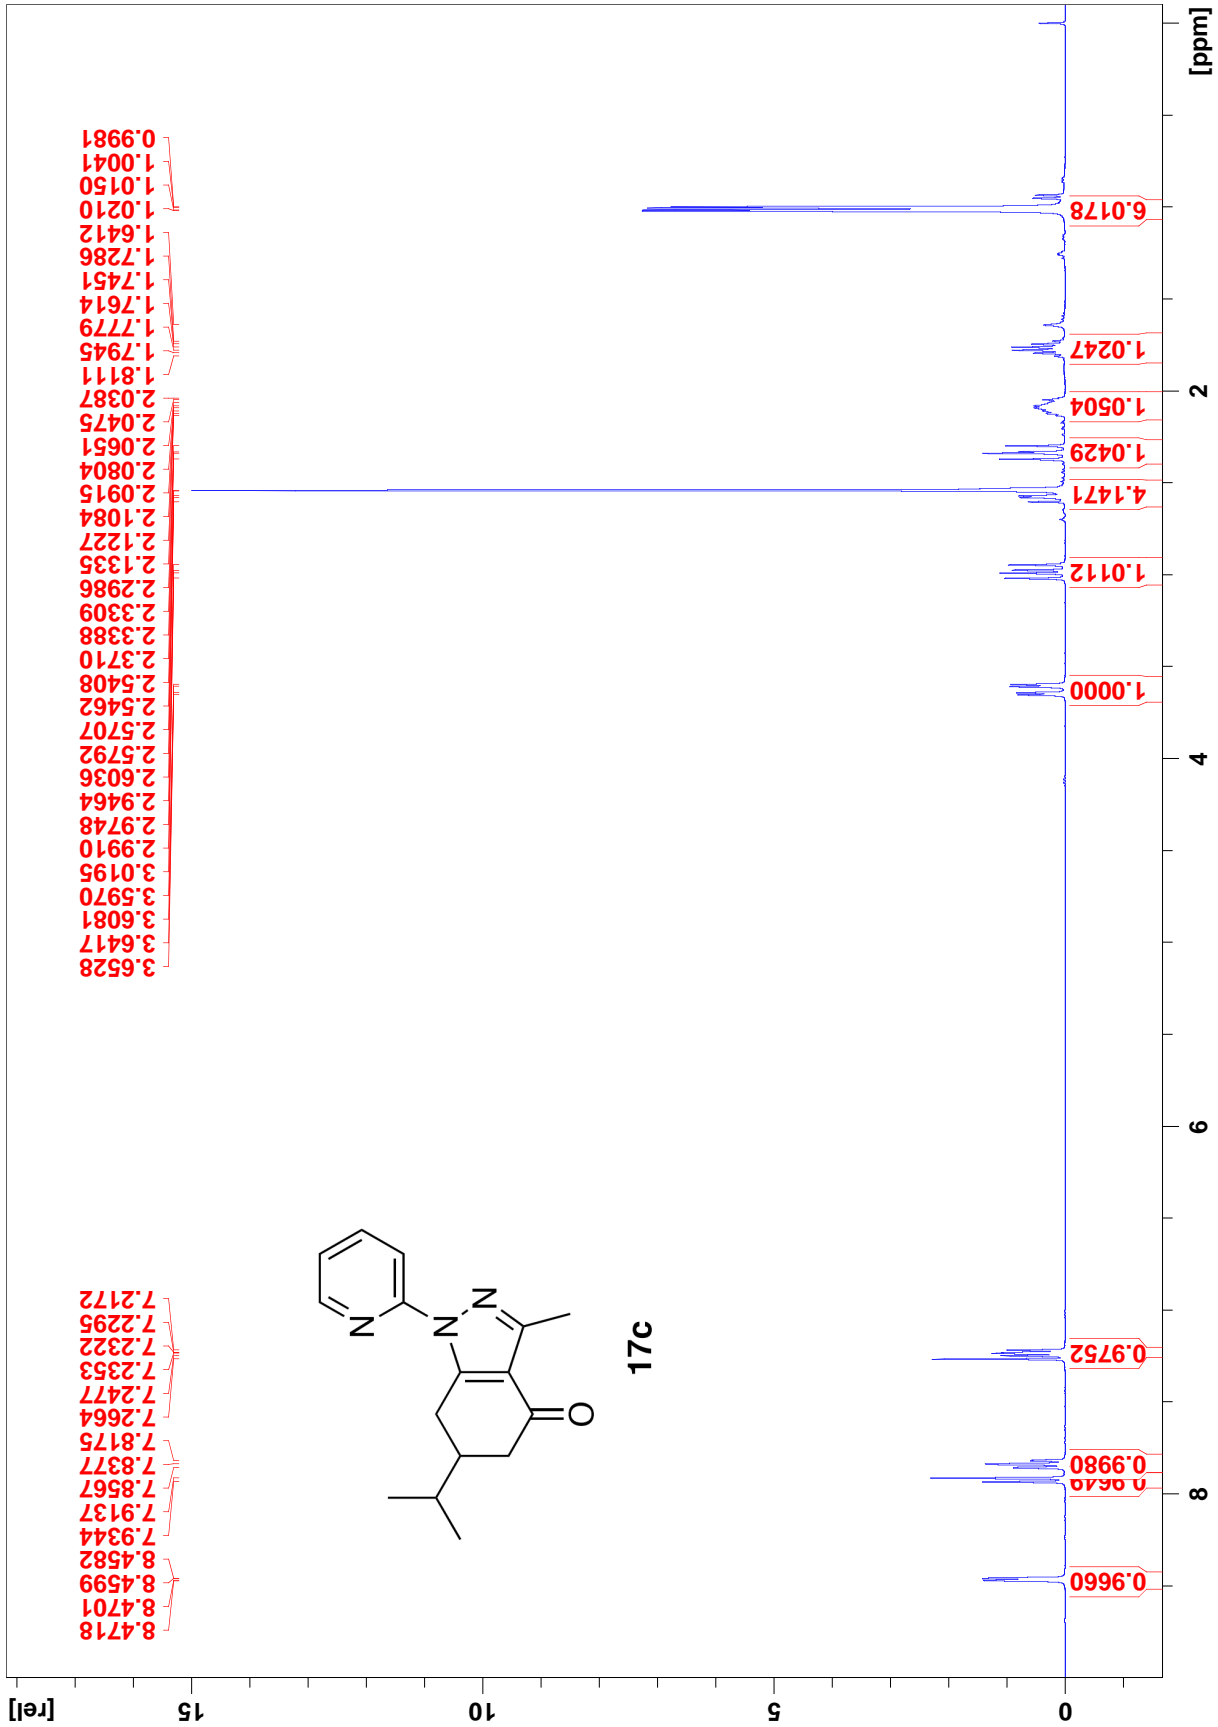

# 13C-NMR

JL08-111908B 3 1 C:\Bruker\TOPSPIN leex3451

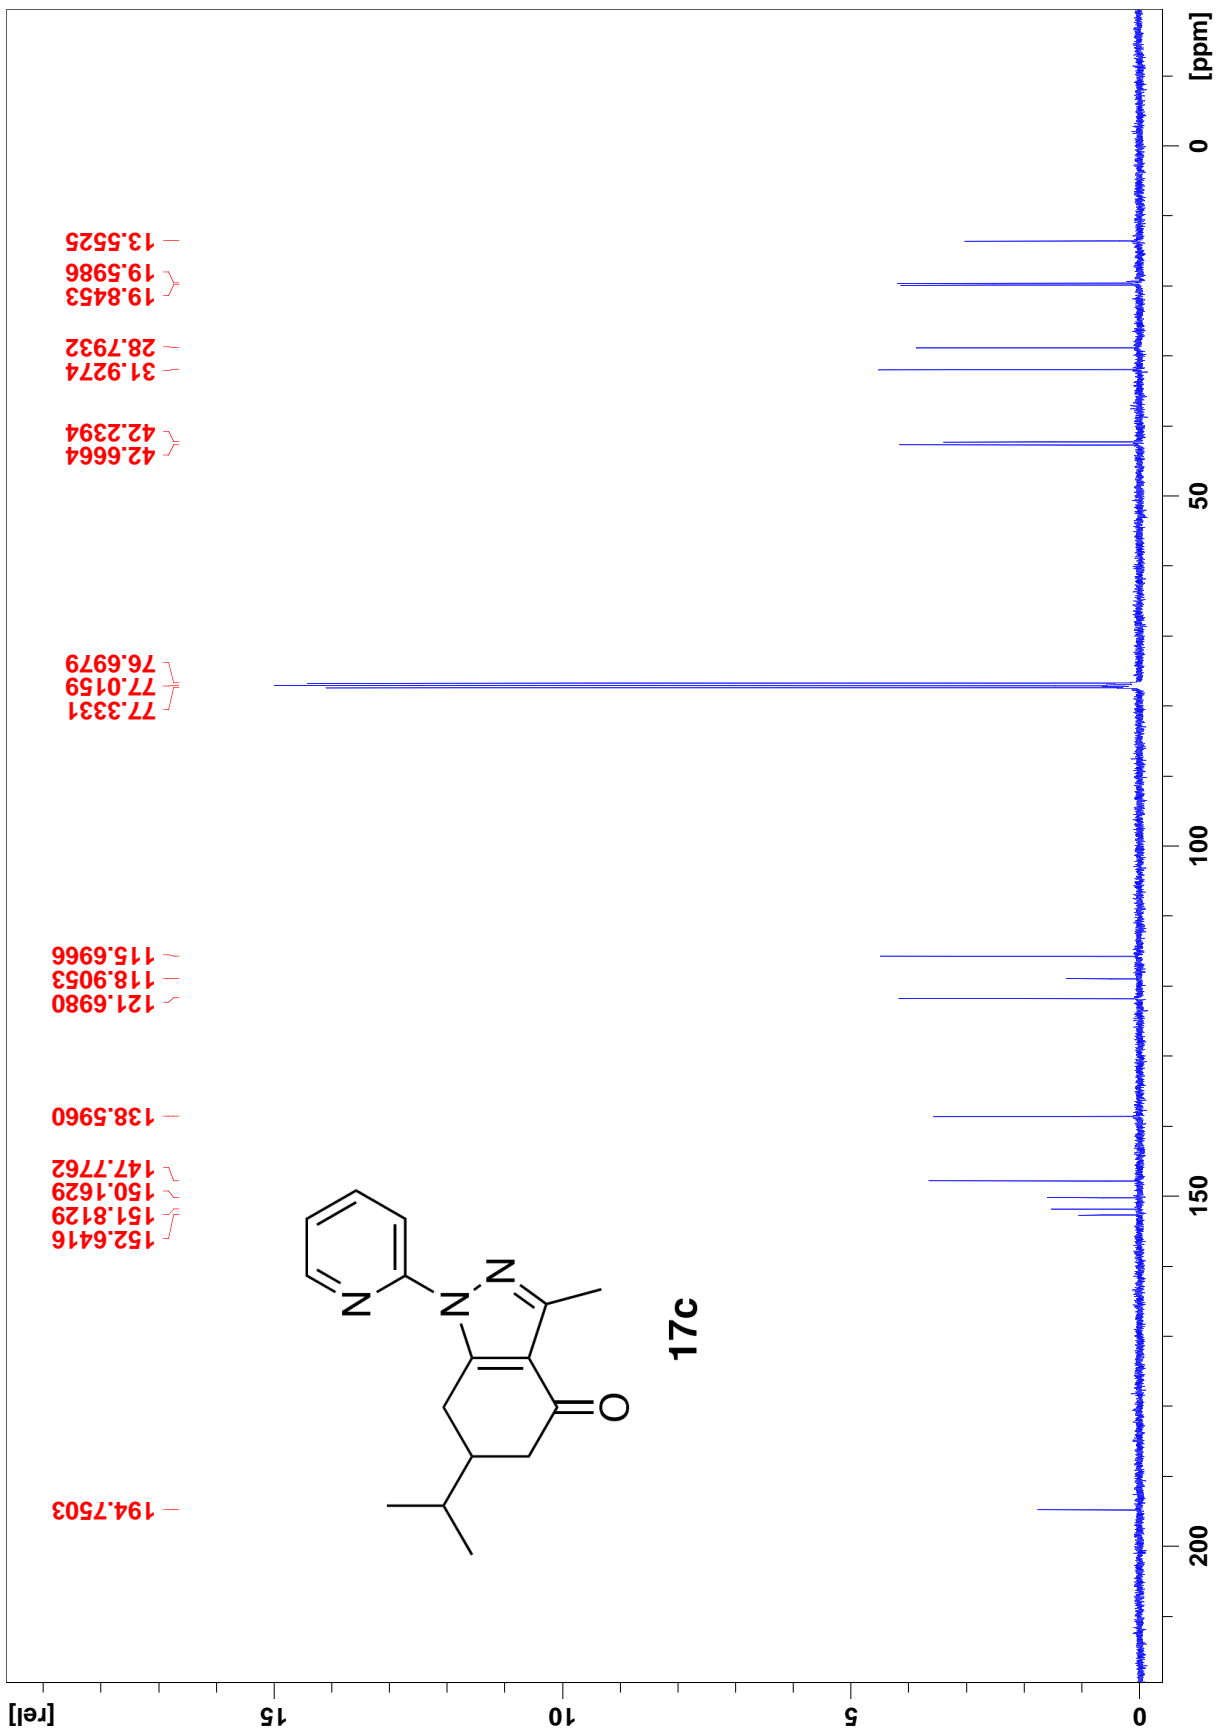

# 1H-NMR

JL08-121508 1 1 C:\Bruker\TOPSPIN leex3451

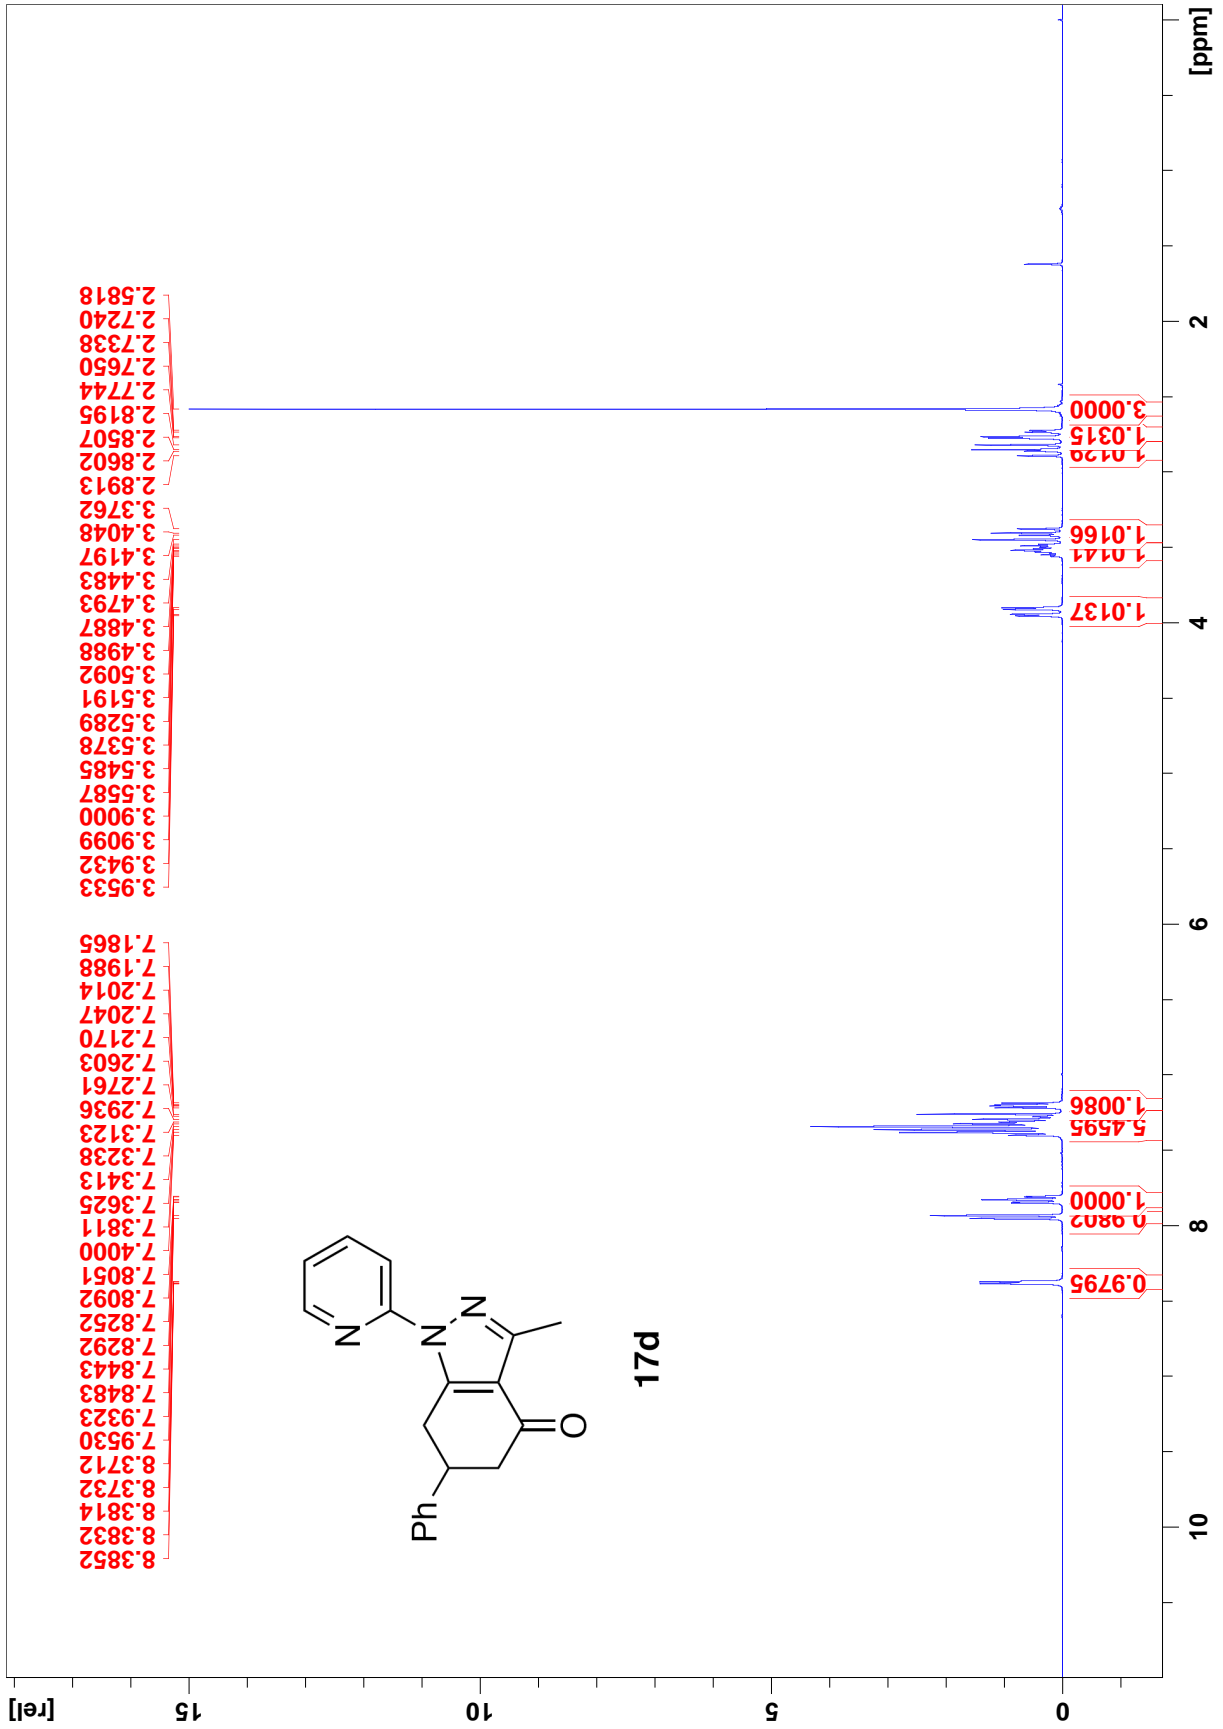



# 13C-NMR

JL08-121508 4 1 C:\Bruker\TOPSPIN leex3451

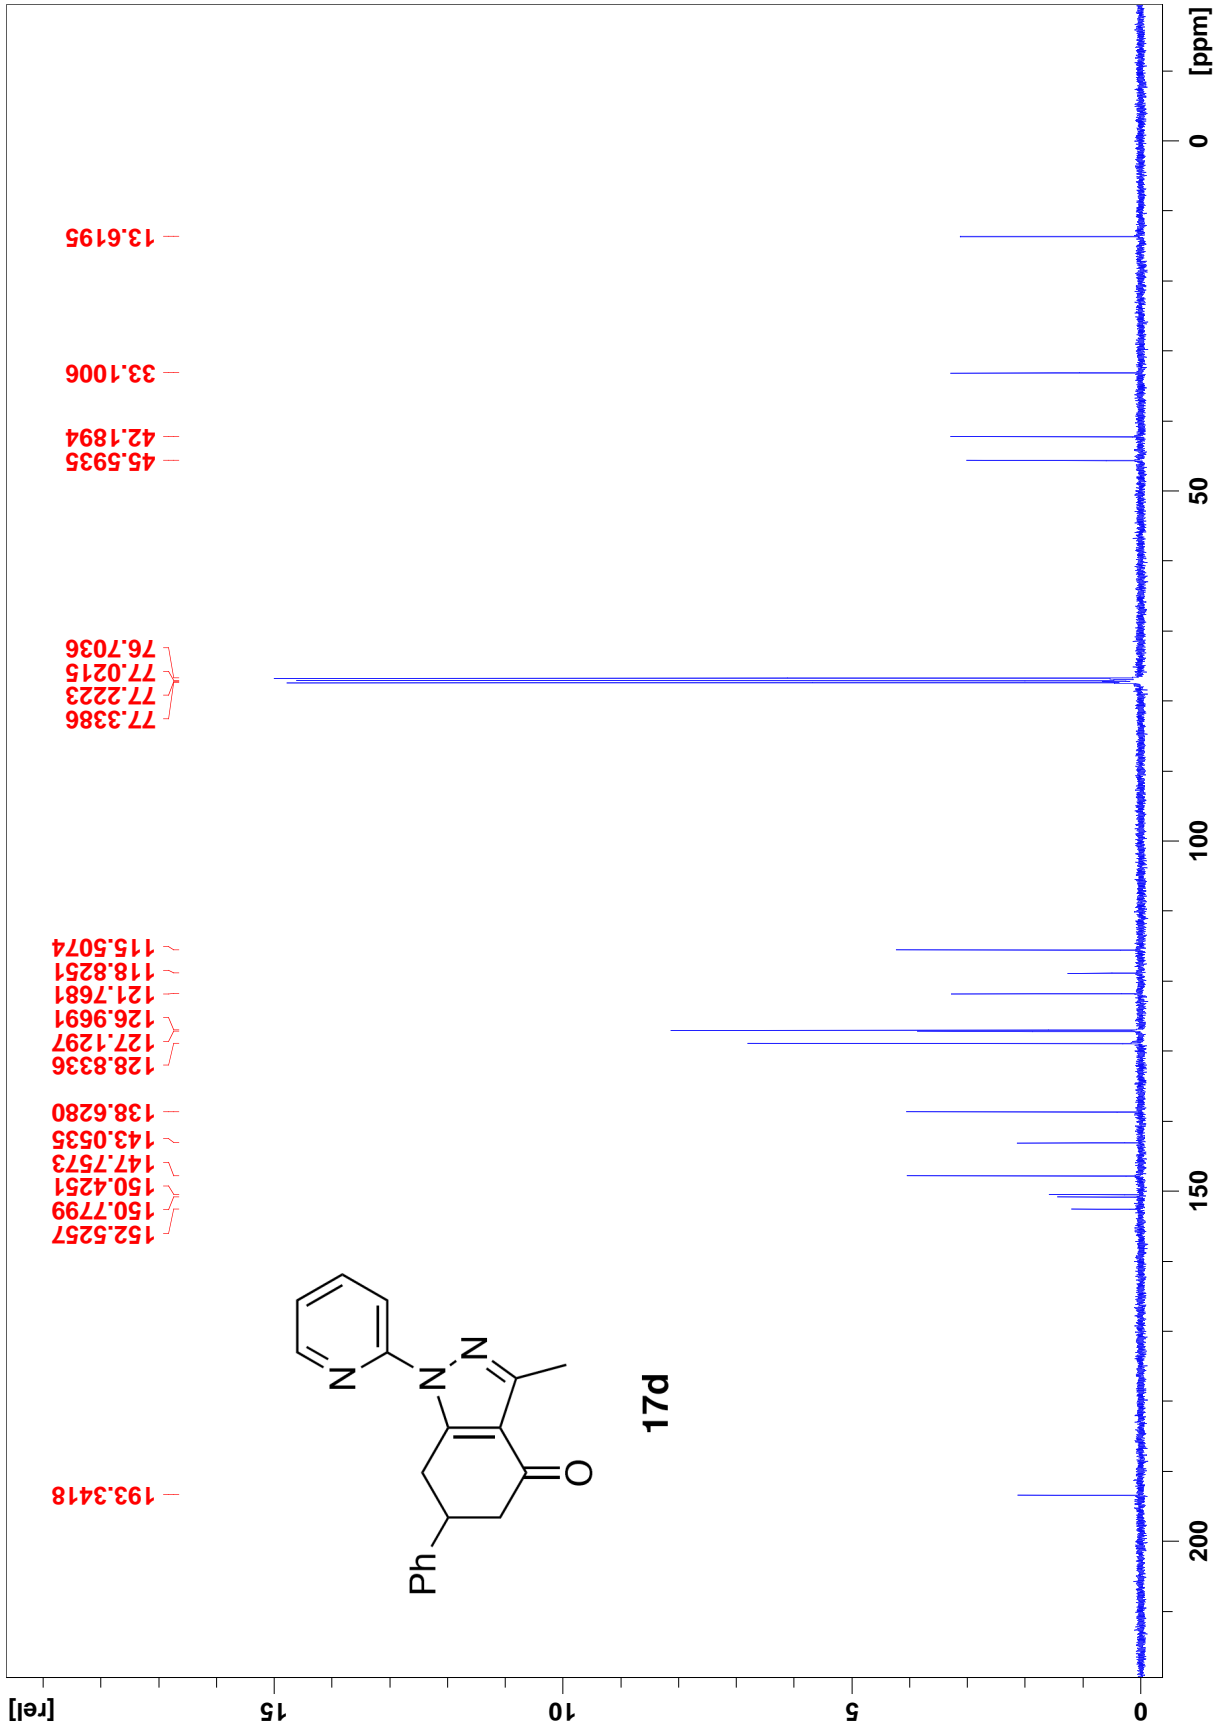

# 1H-NMR

JL09-010509C 1 1 C:\Bruker\TOPSPIN leex3451

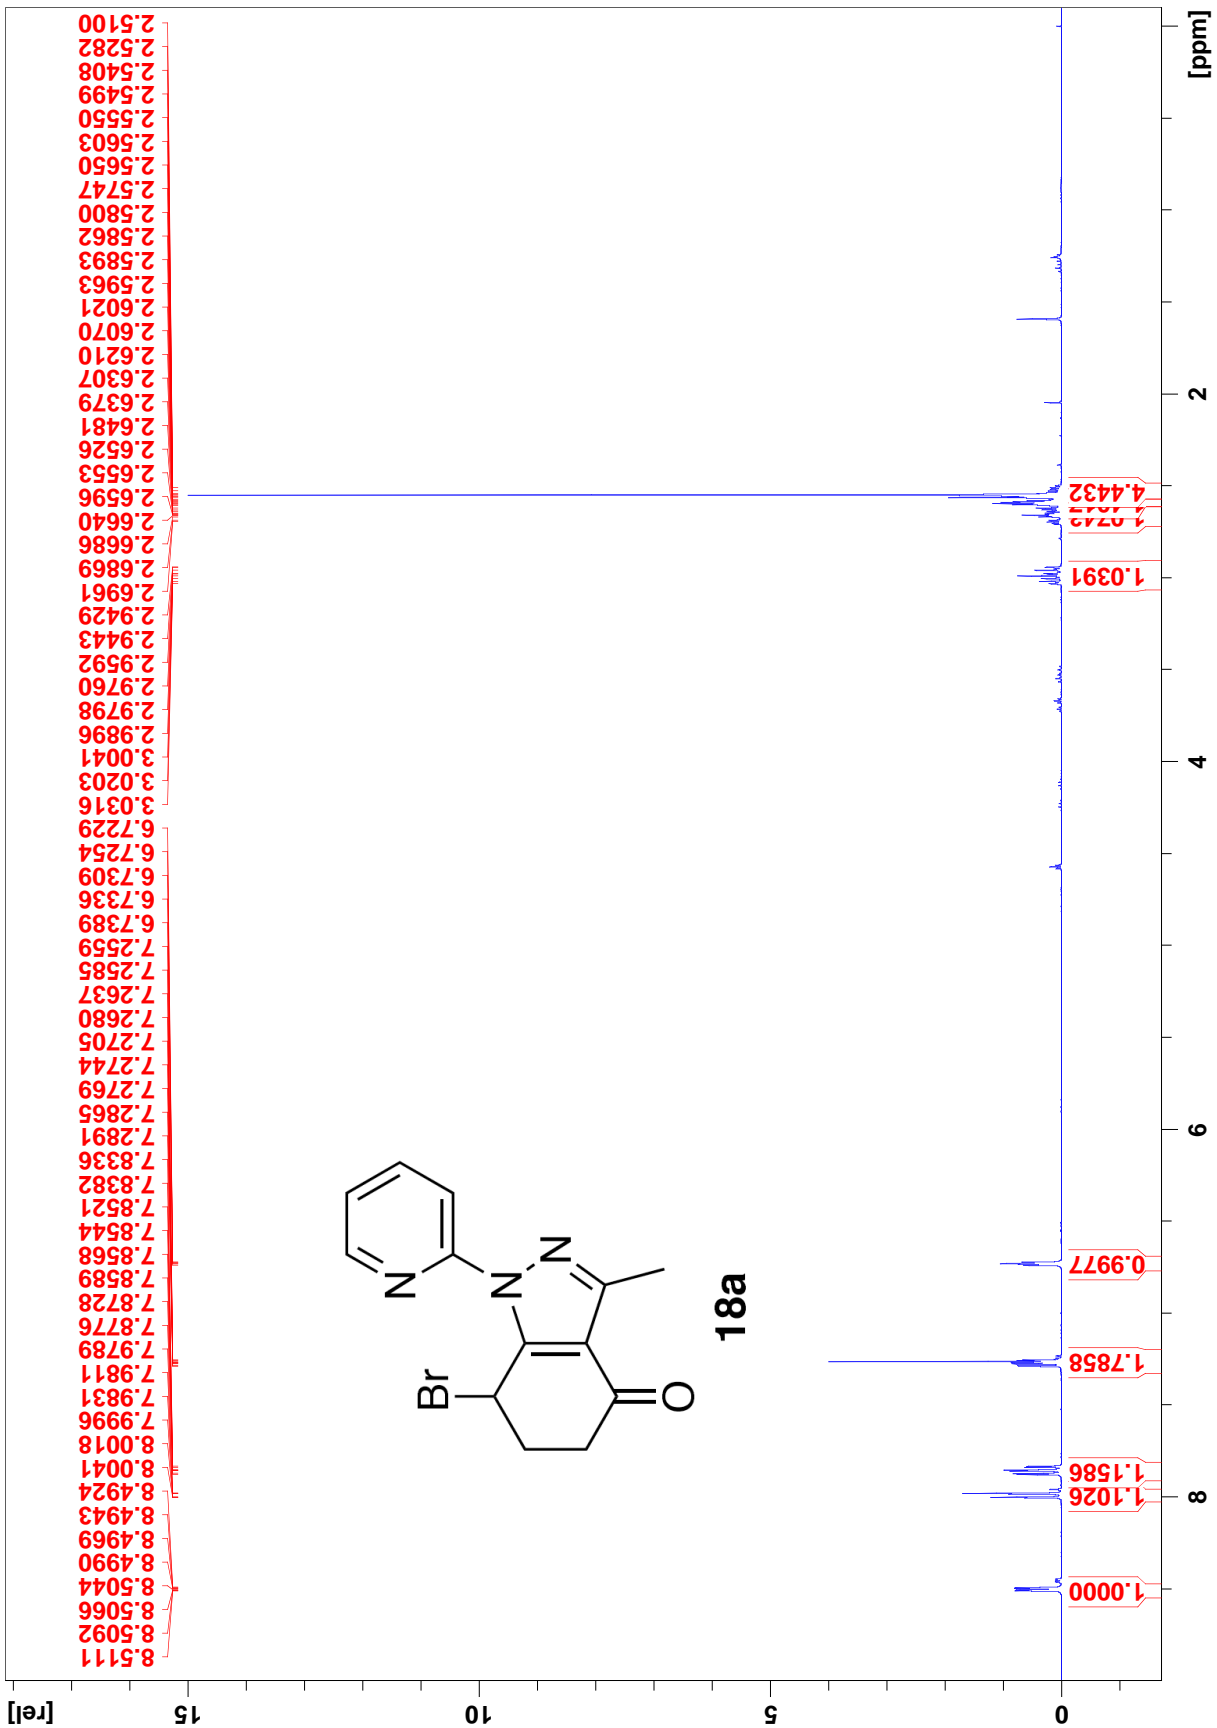

# 13C-NMR

JL09-010509C 4 1 C:\Bruker\TOPSPIN leex3451

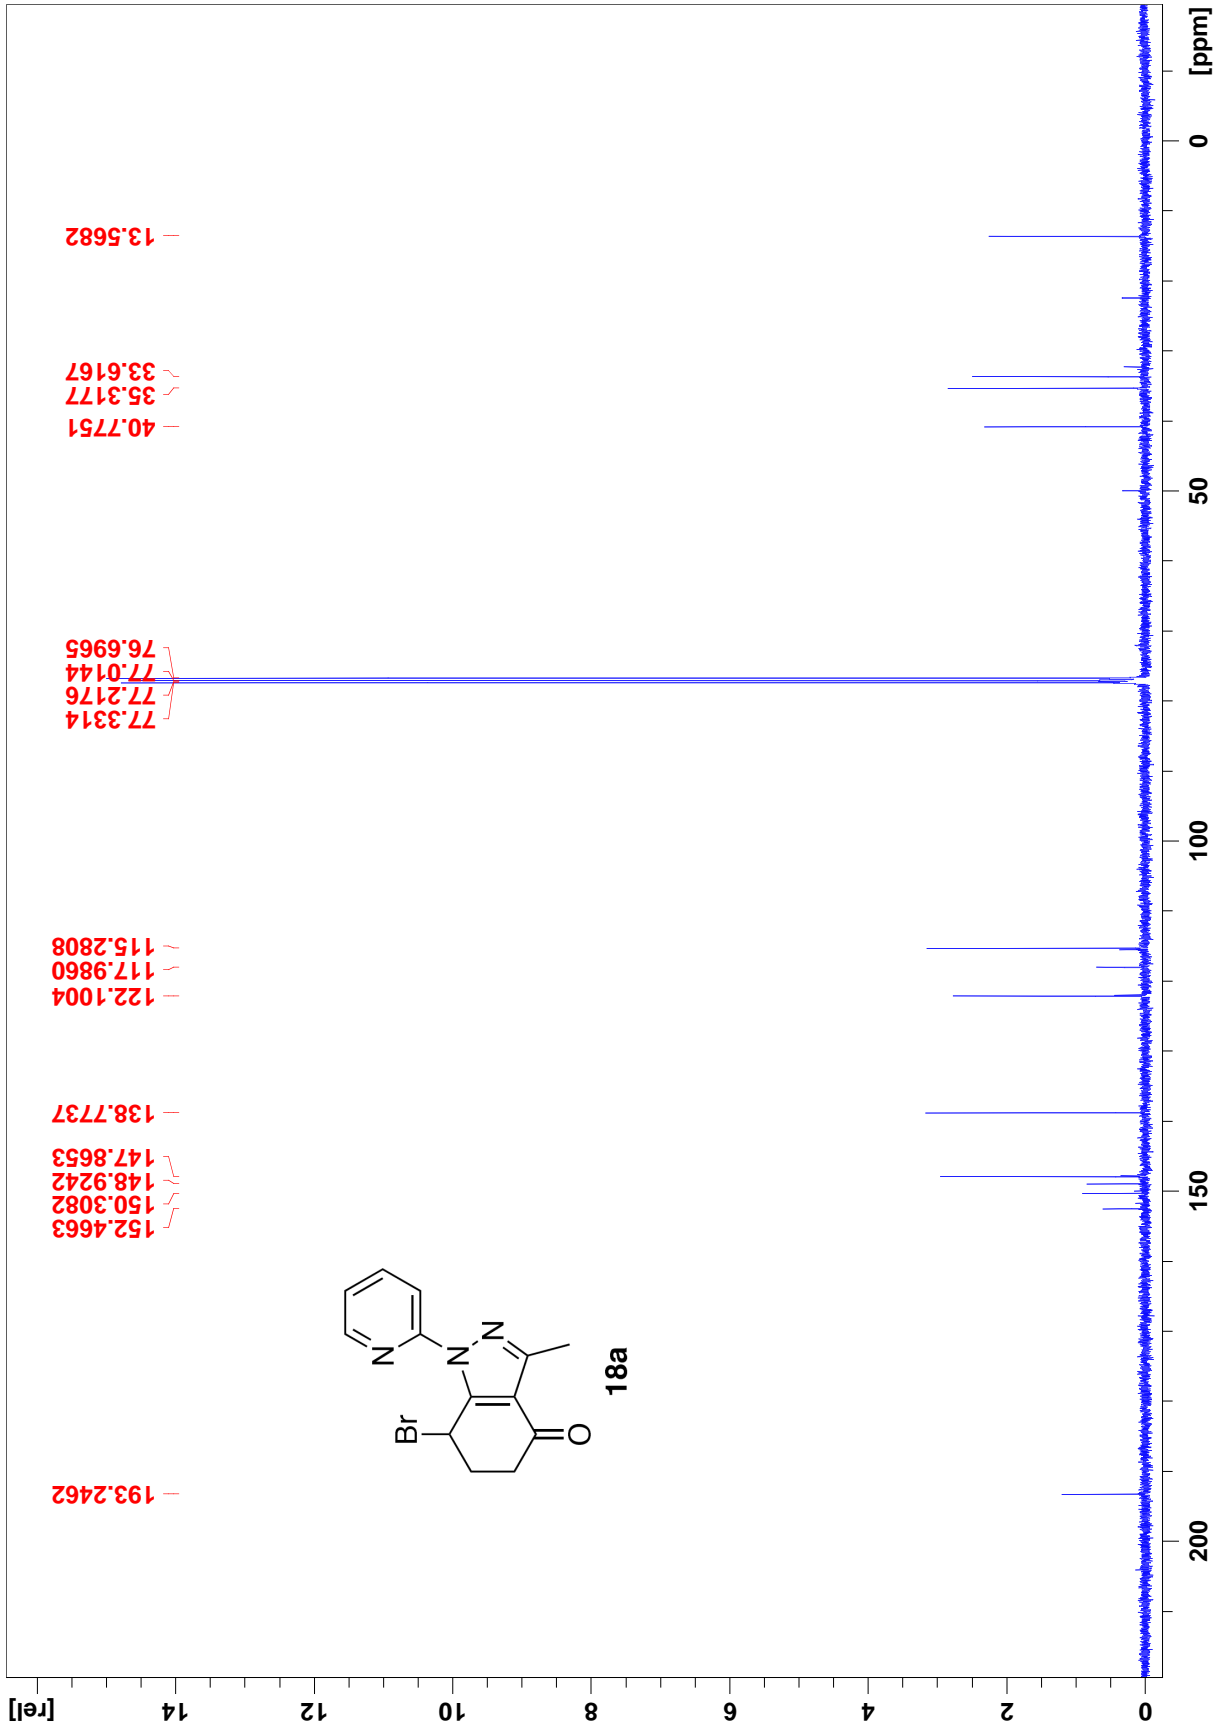

# 1H-NMR

JL09-011409C 1 1 C:\Bruker\TOPSPIN leex3451

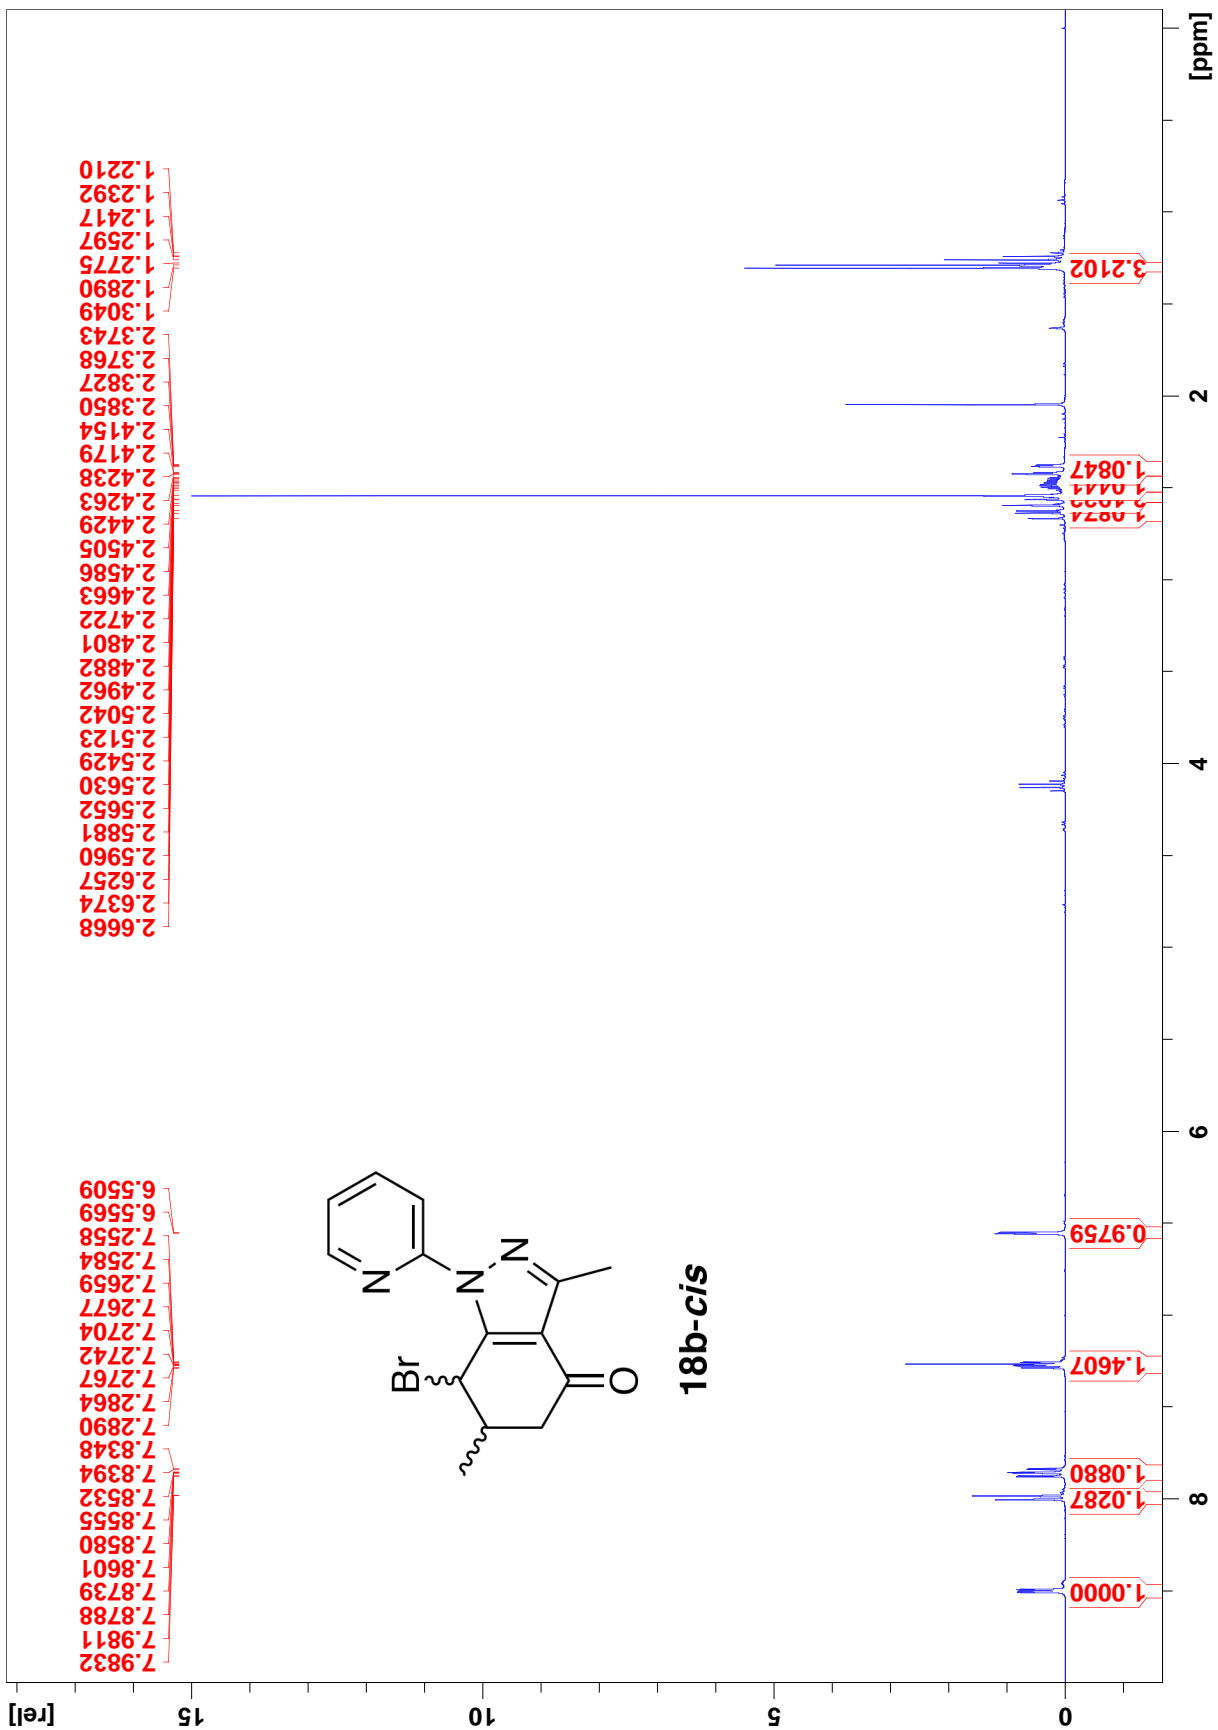

# 13C-NMR

JL09-011409C 4 1 C:\Bruker\TOPSPIN leex3451

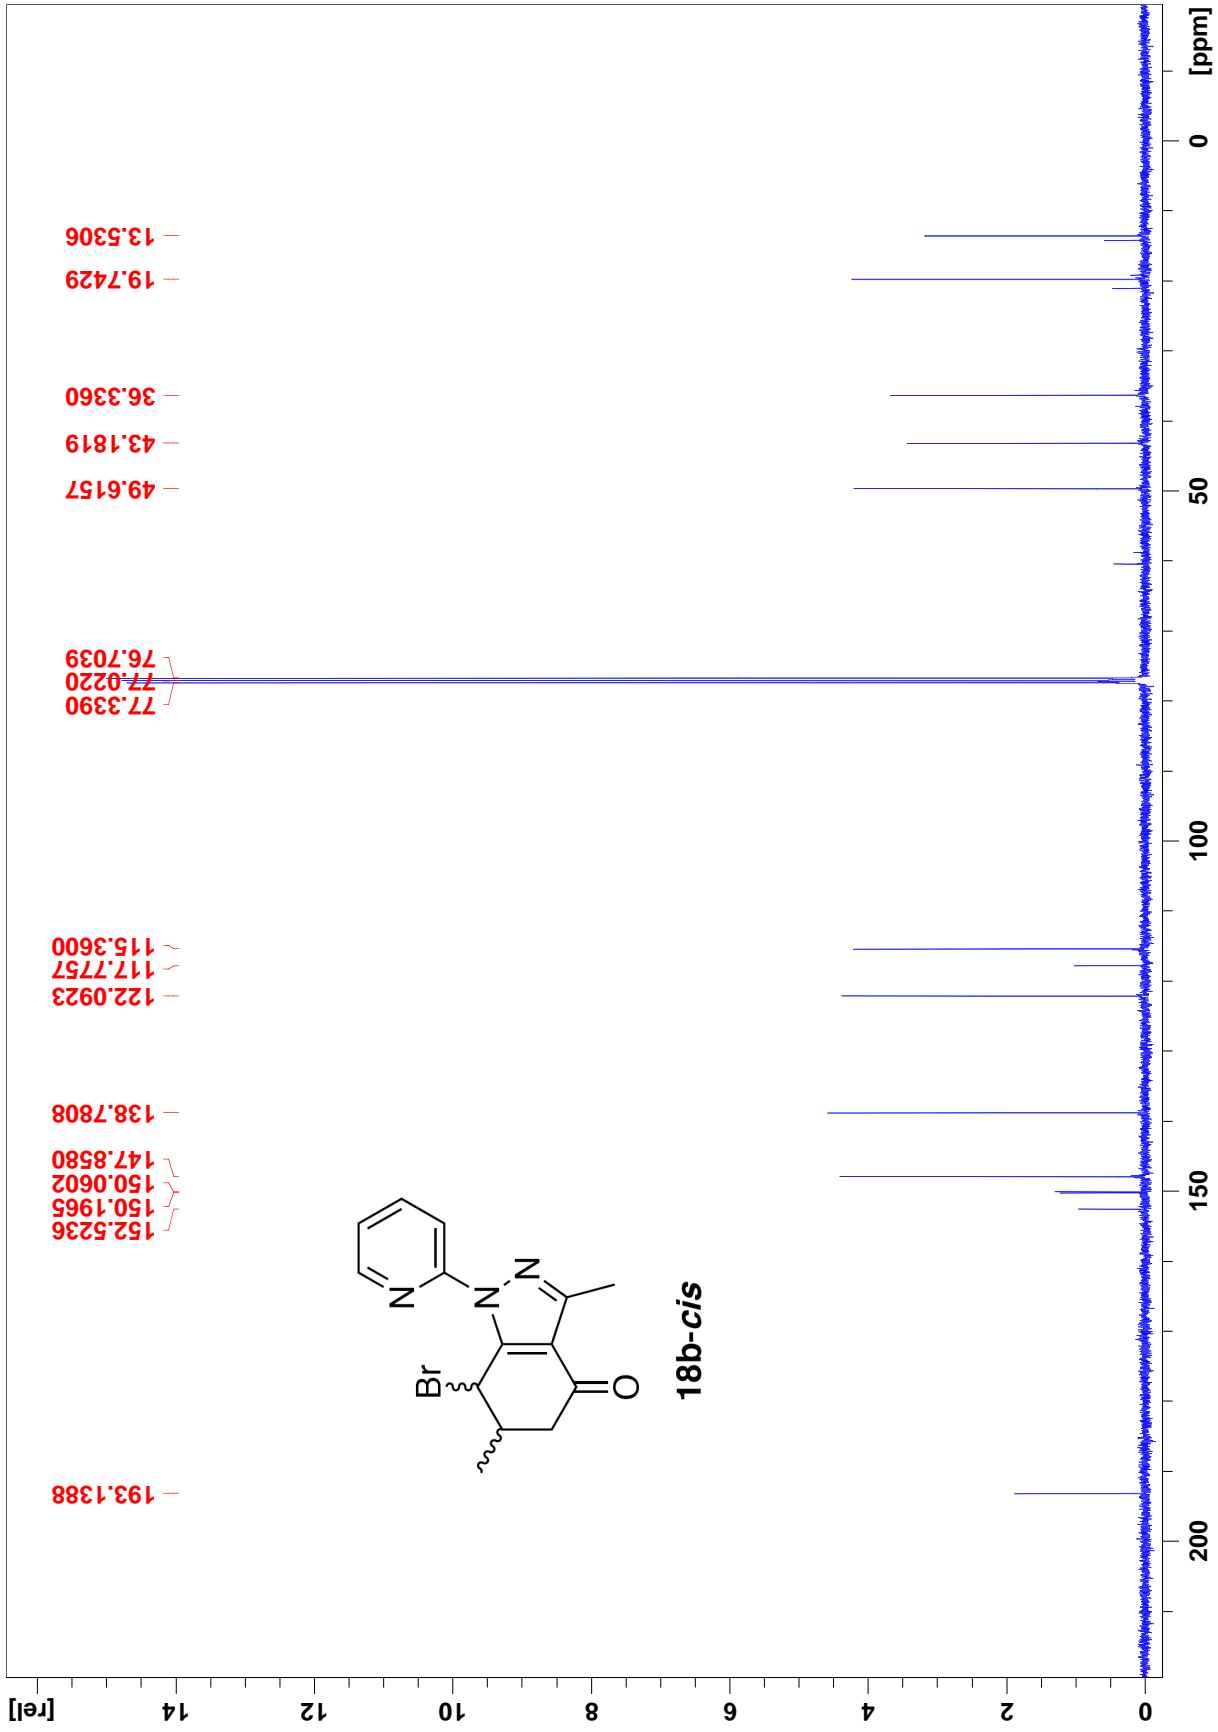

# 1H-NMR

JL09-011409B 1 1 C:\Bruker\TOPSPIN leex3451

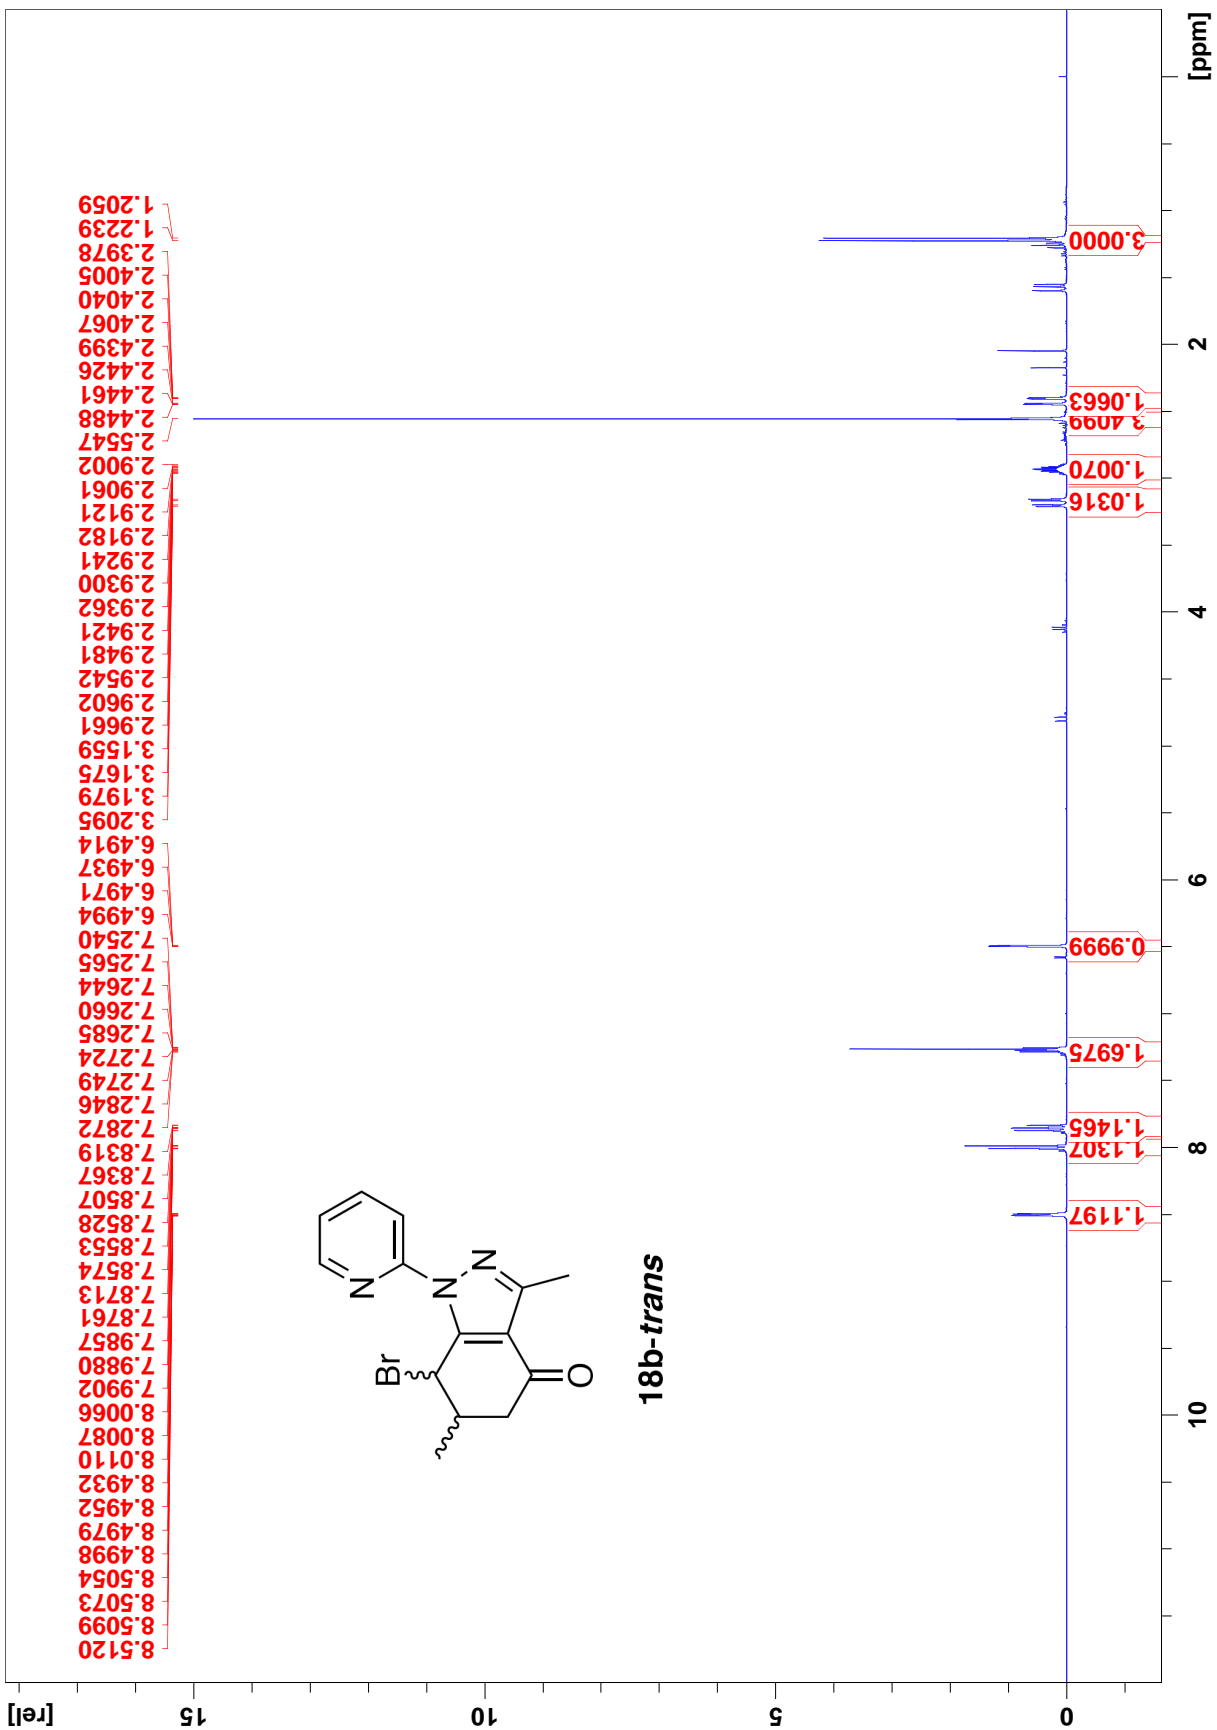

# 13C-NMR

JL09-011409B 4 1 C:\Bruker\TOPSPIN leex3451

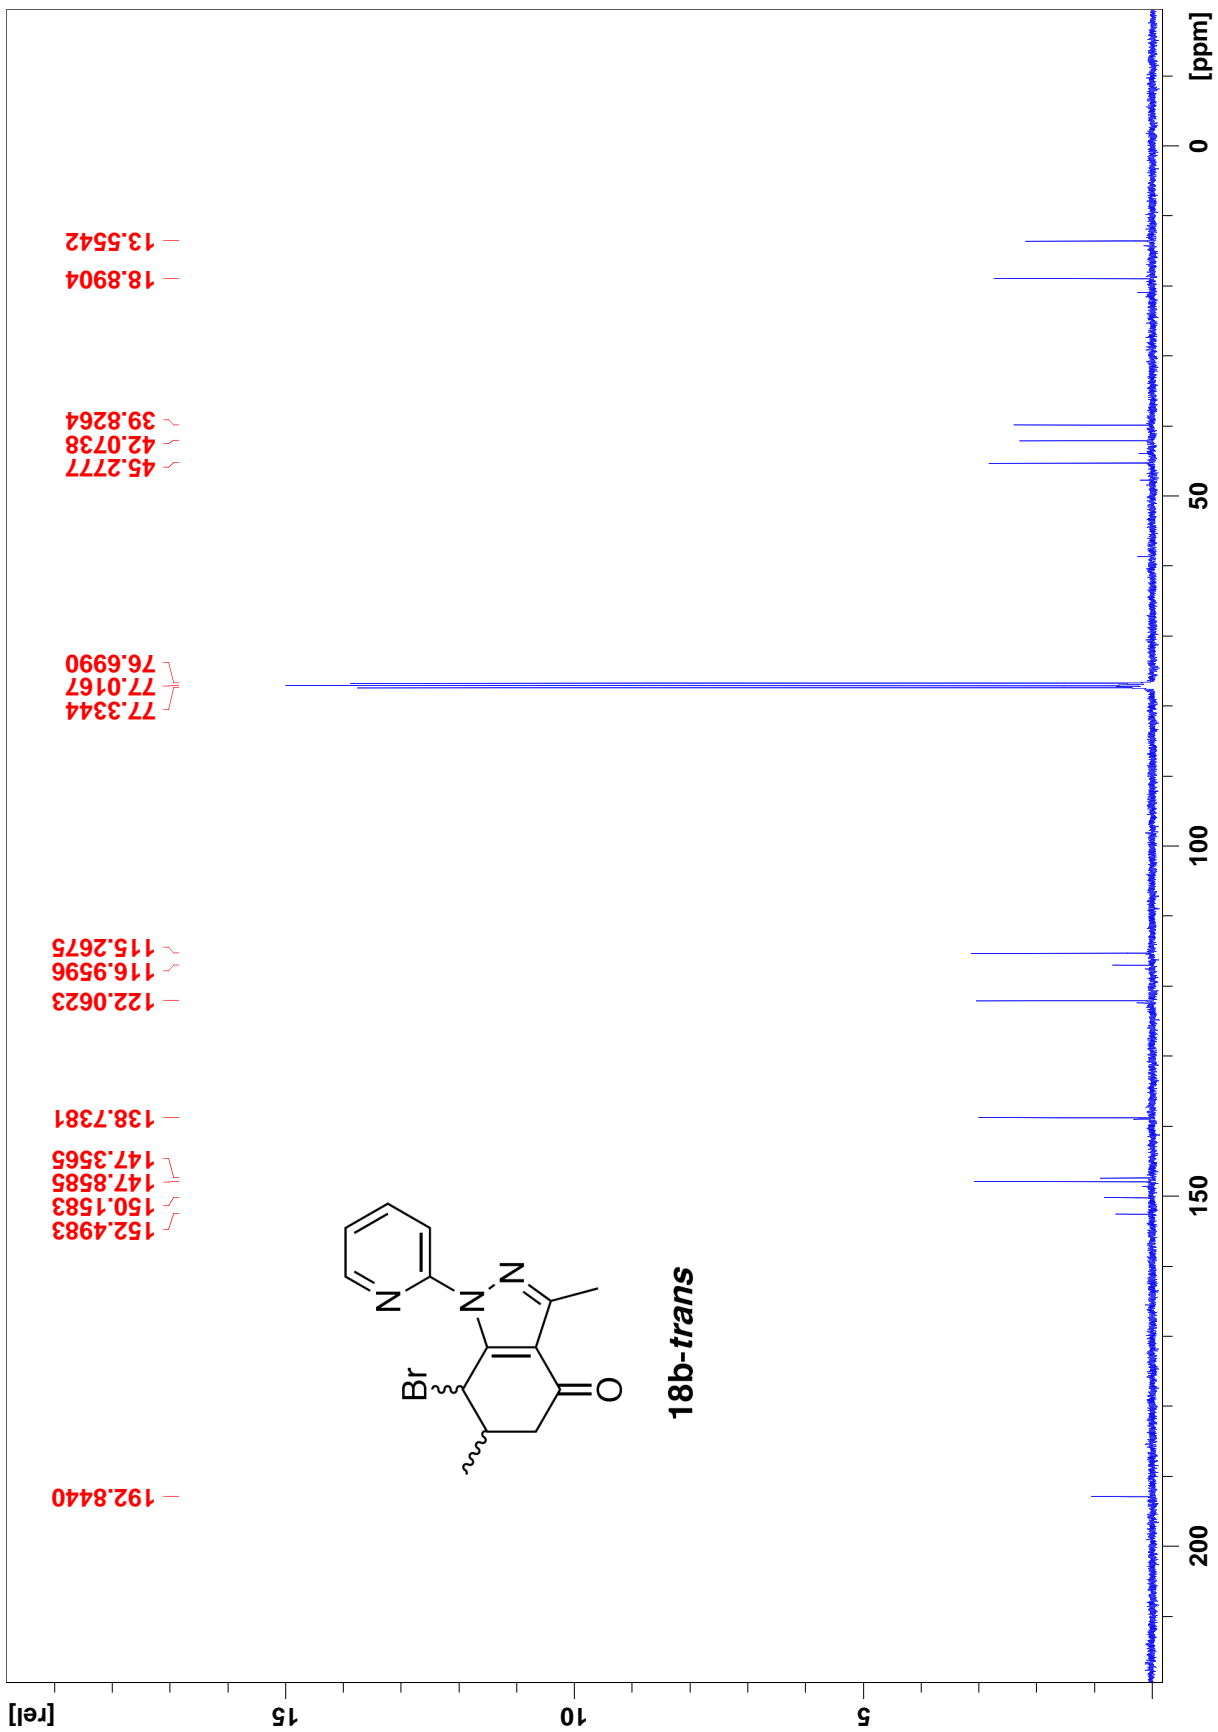

# 1H-NMR

JL08-120908C 1 1 C:\Bruker\TOPSPIN leex3451

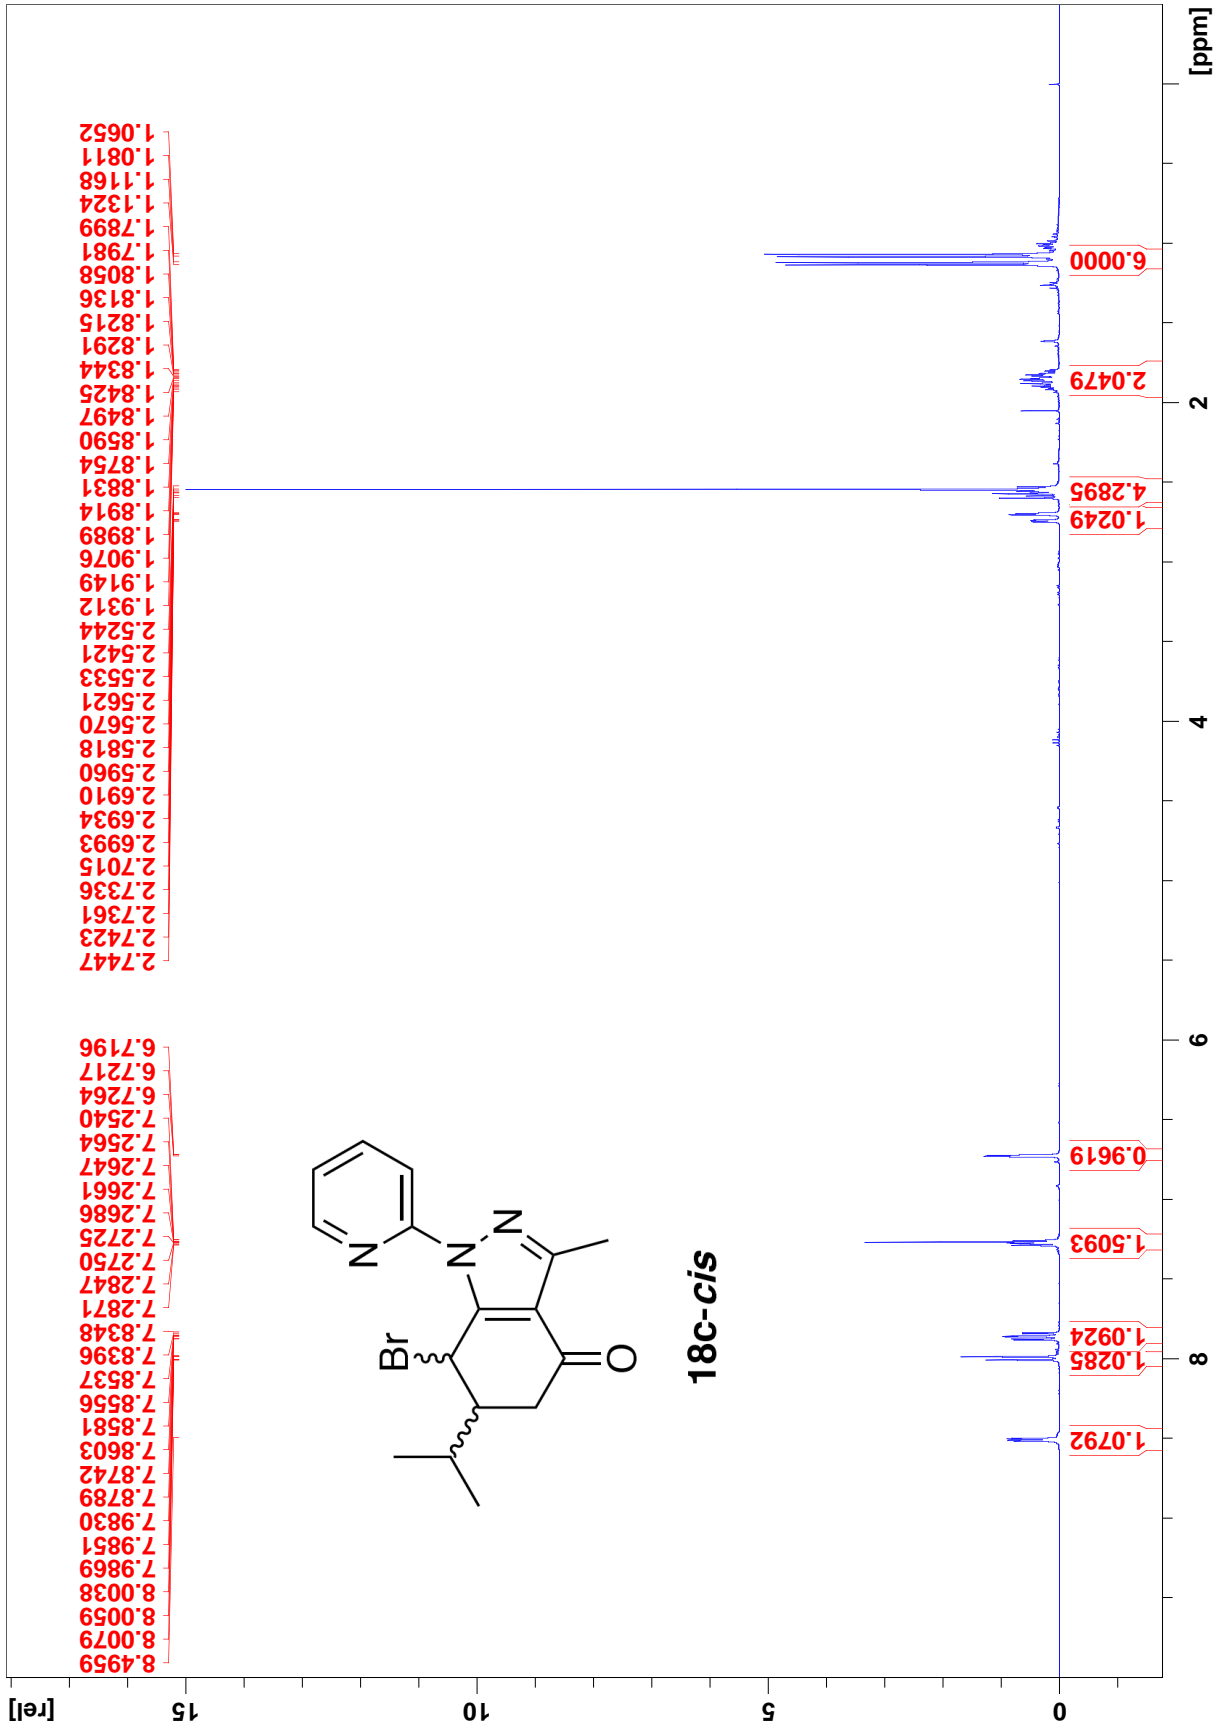



# 13C-NMR

JL08-120908C 3 1 C:\Bruker\TOPSPIN leex345I

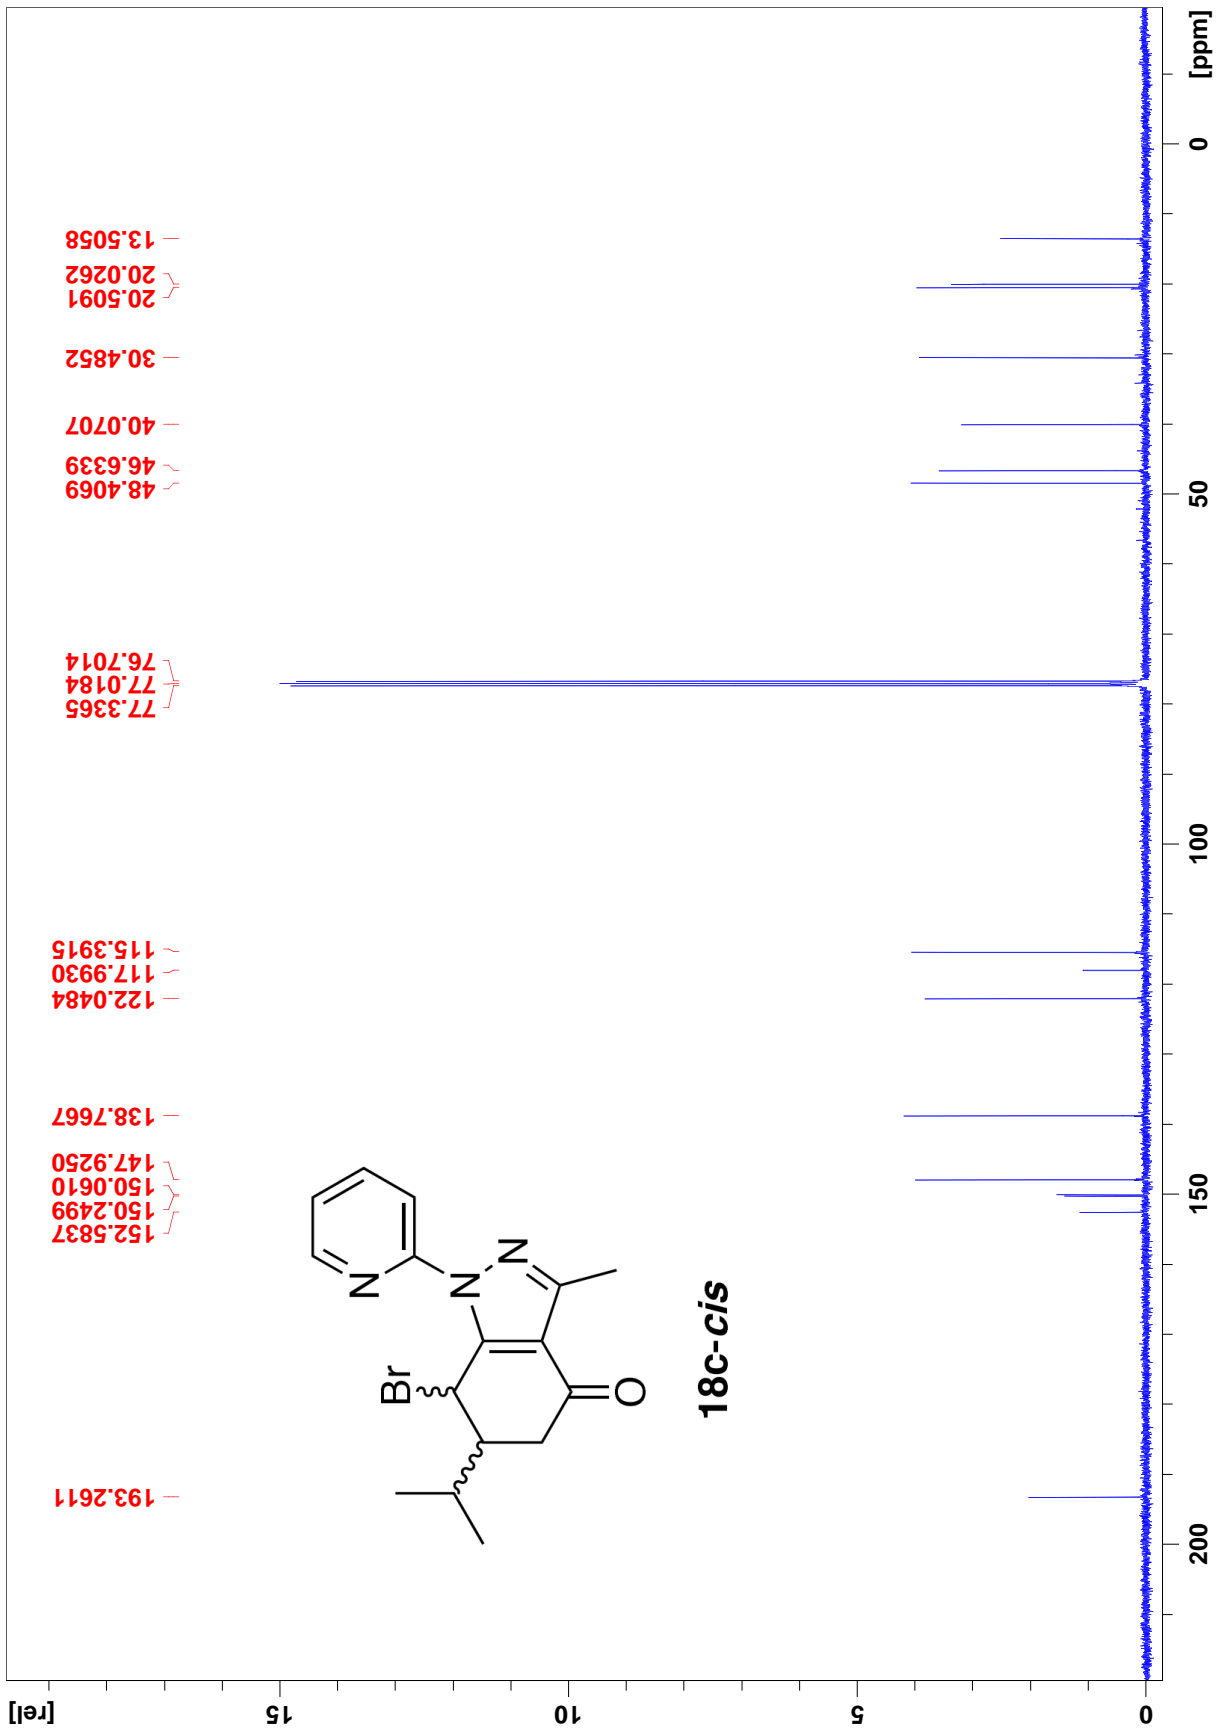

# 1H-NMR

JL08-120908B 1 1 C:\Bruker\TOPSPIN leex3451

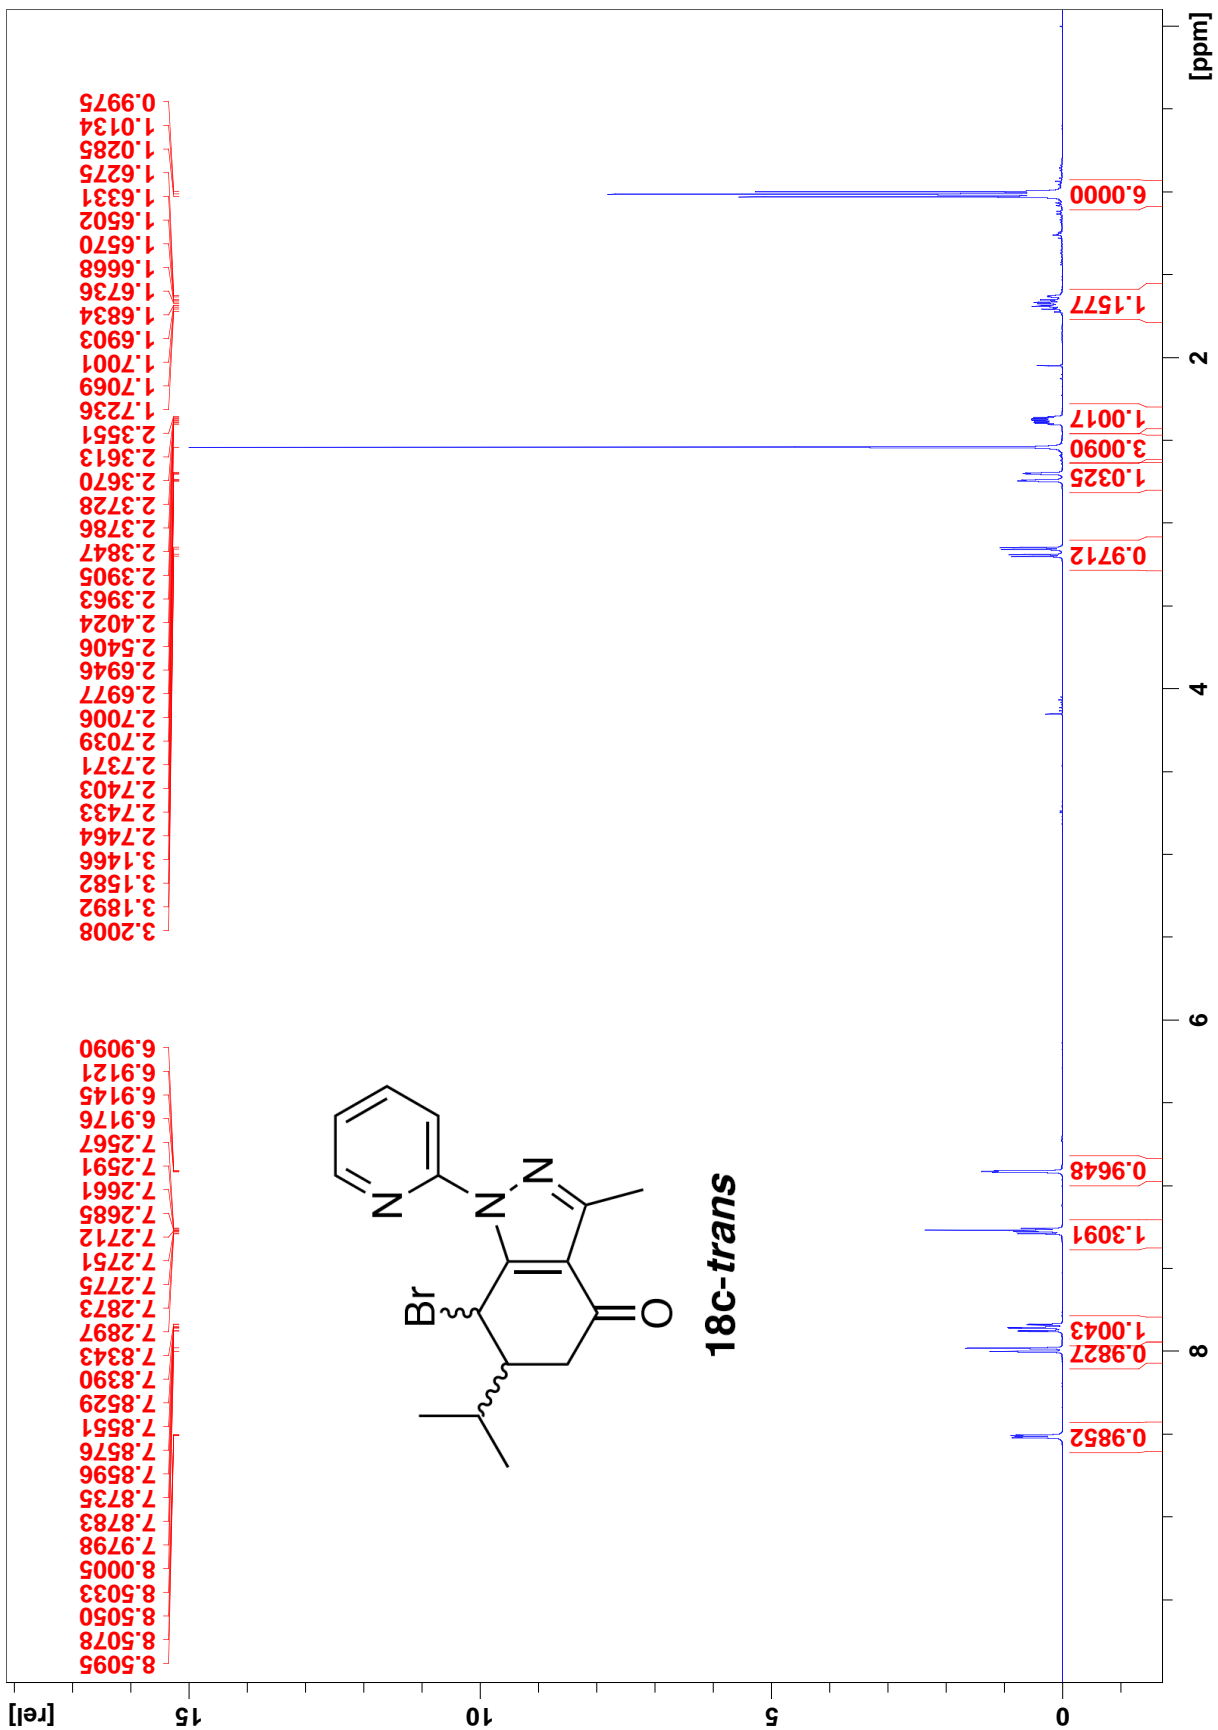

# 13C-NMR

JL08-120908B 3 1 C:\Bruker\TOPSPIN leex3451

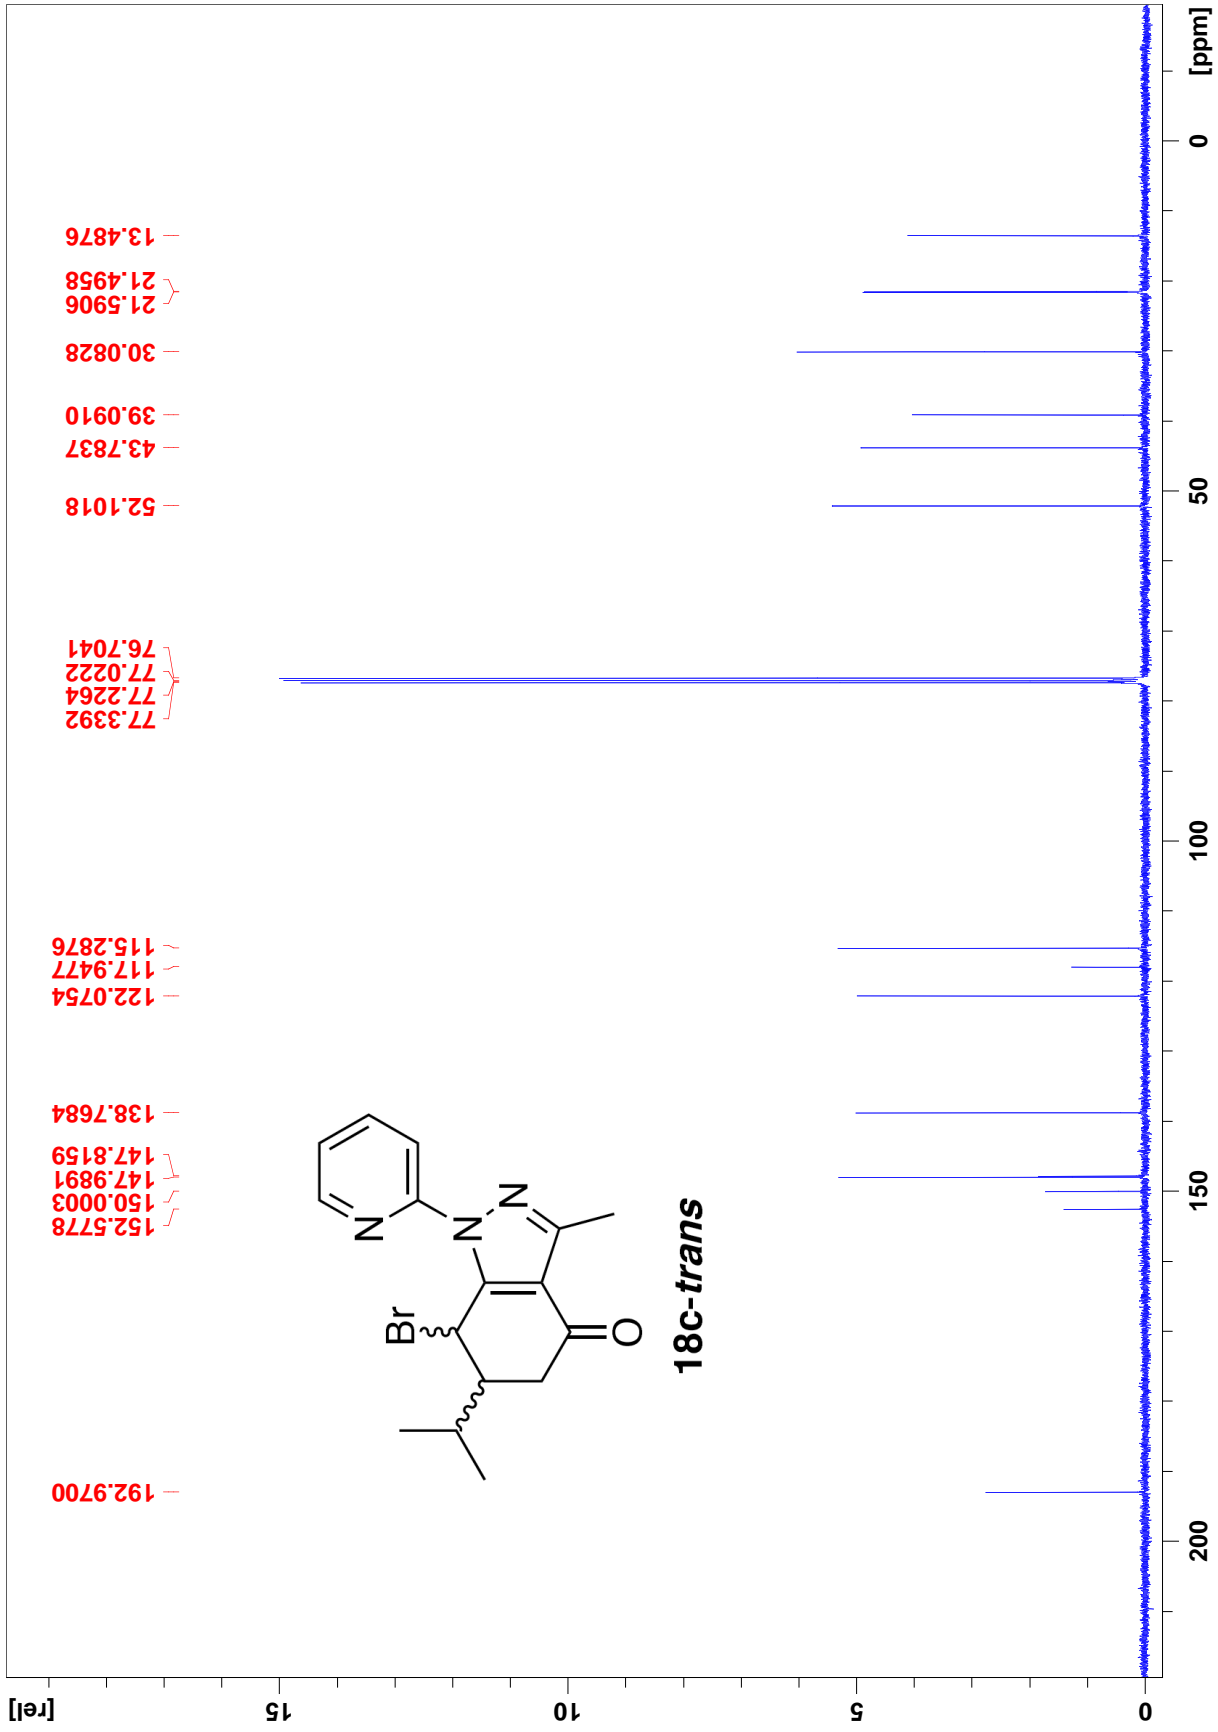

# 1H-NMR

JL09-011509B 1 1 C:\Bruker\TOPSPIN leex3451

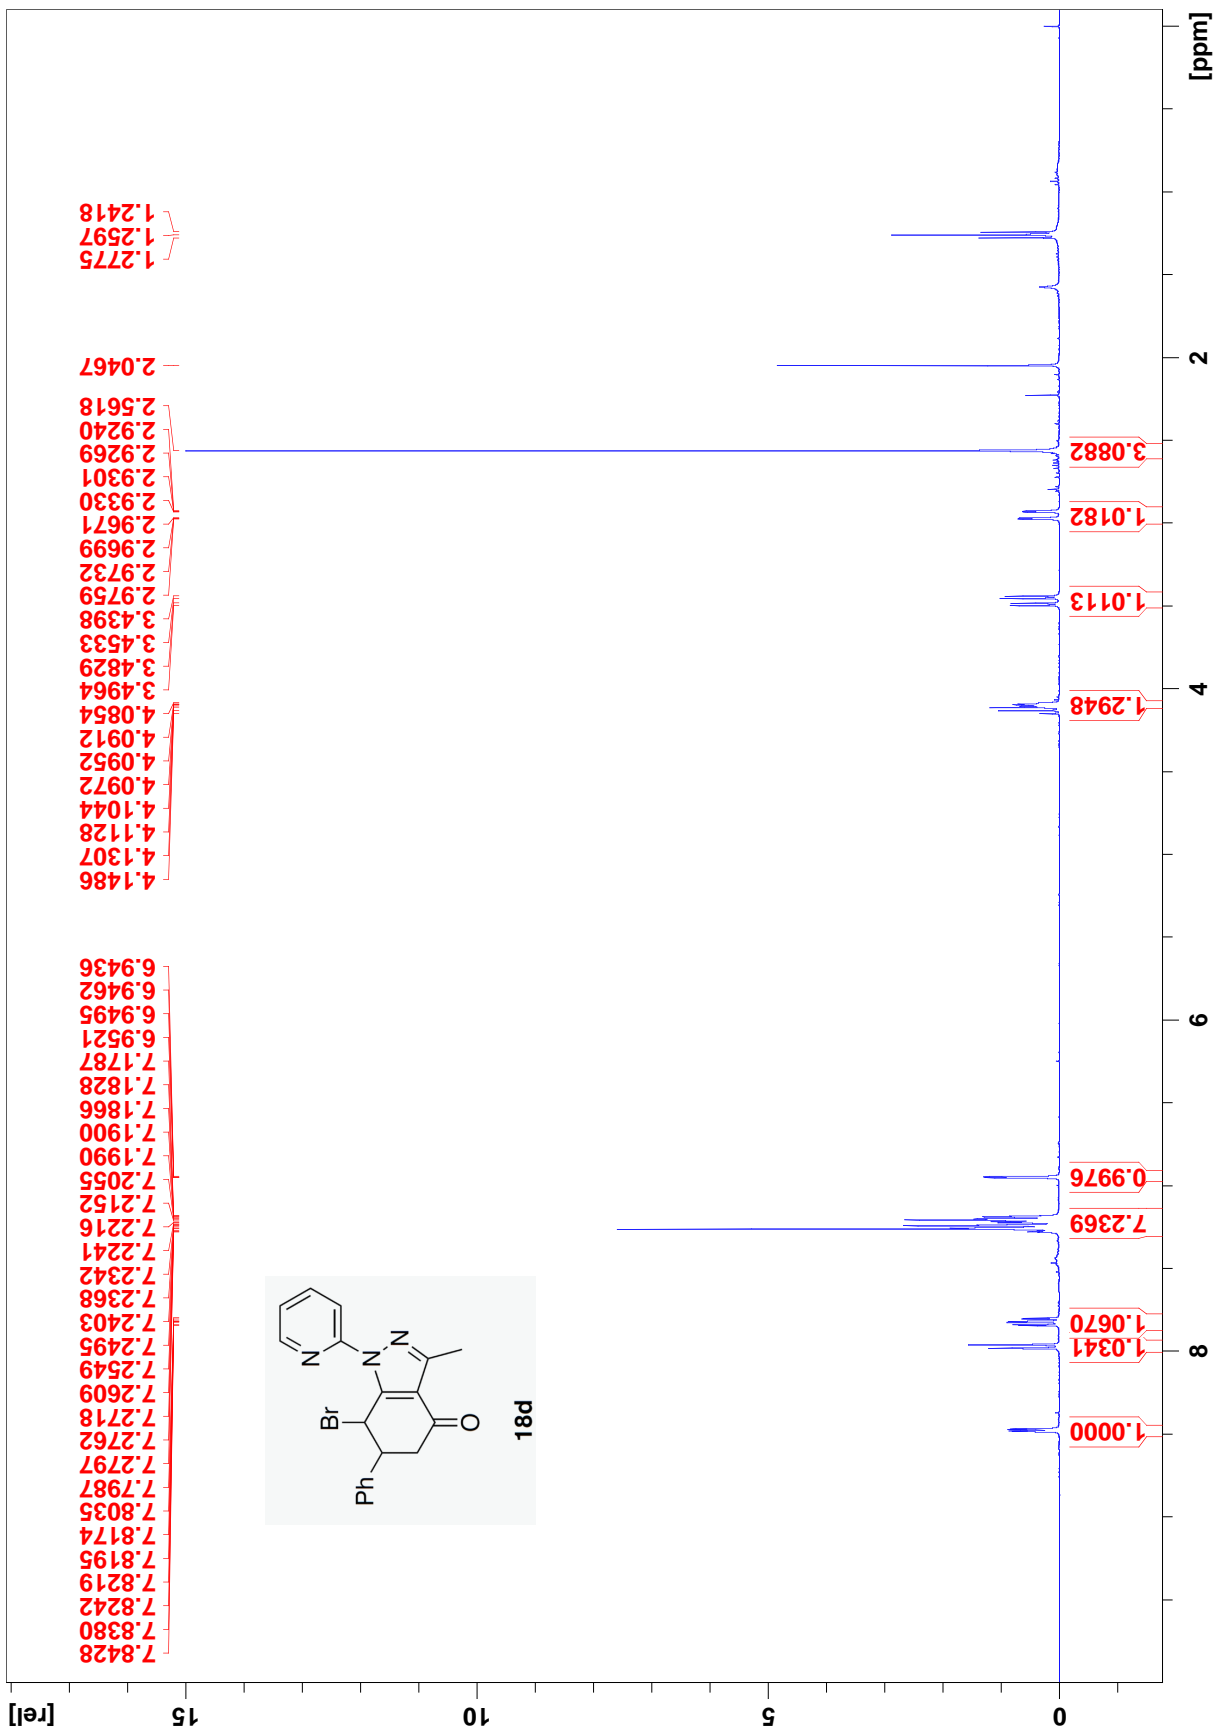

# 13C-NMR

JL09-011509B 3 1 C:\Bruker\TOPSPIN leex3451

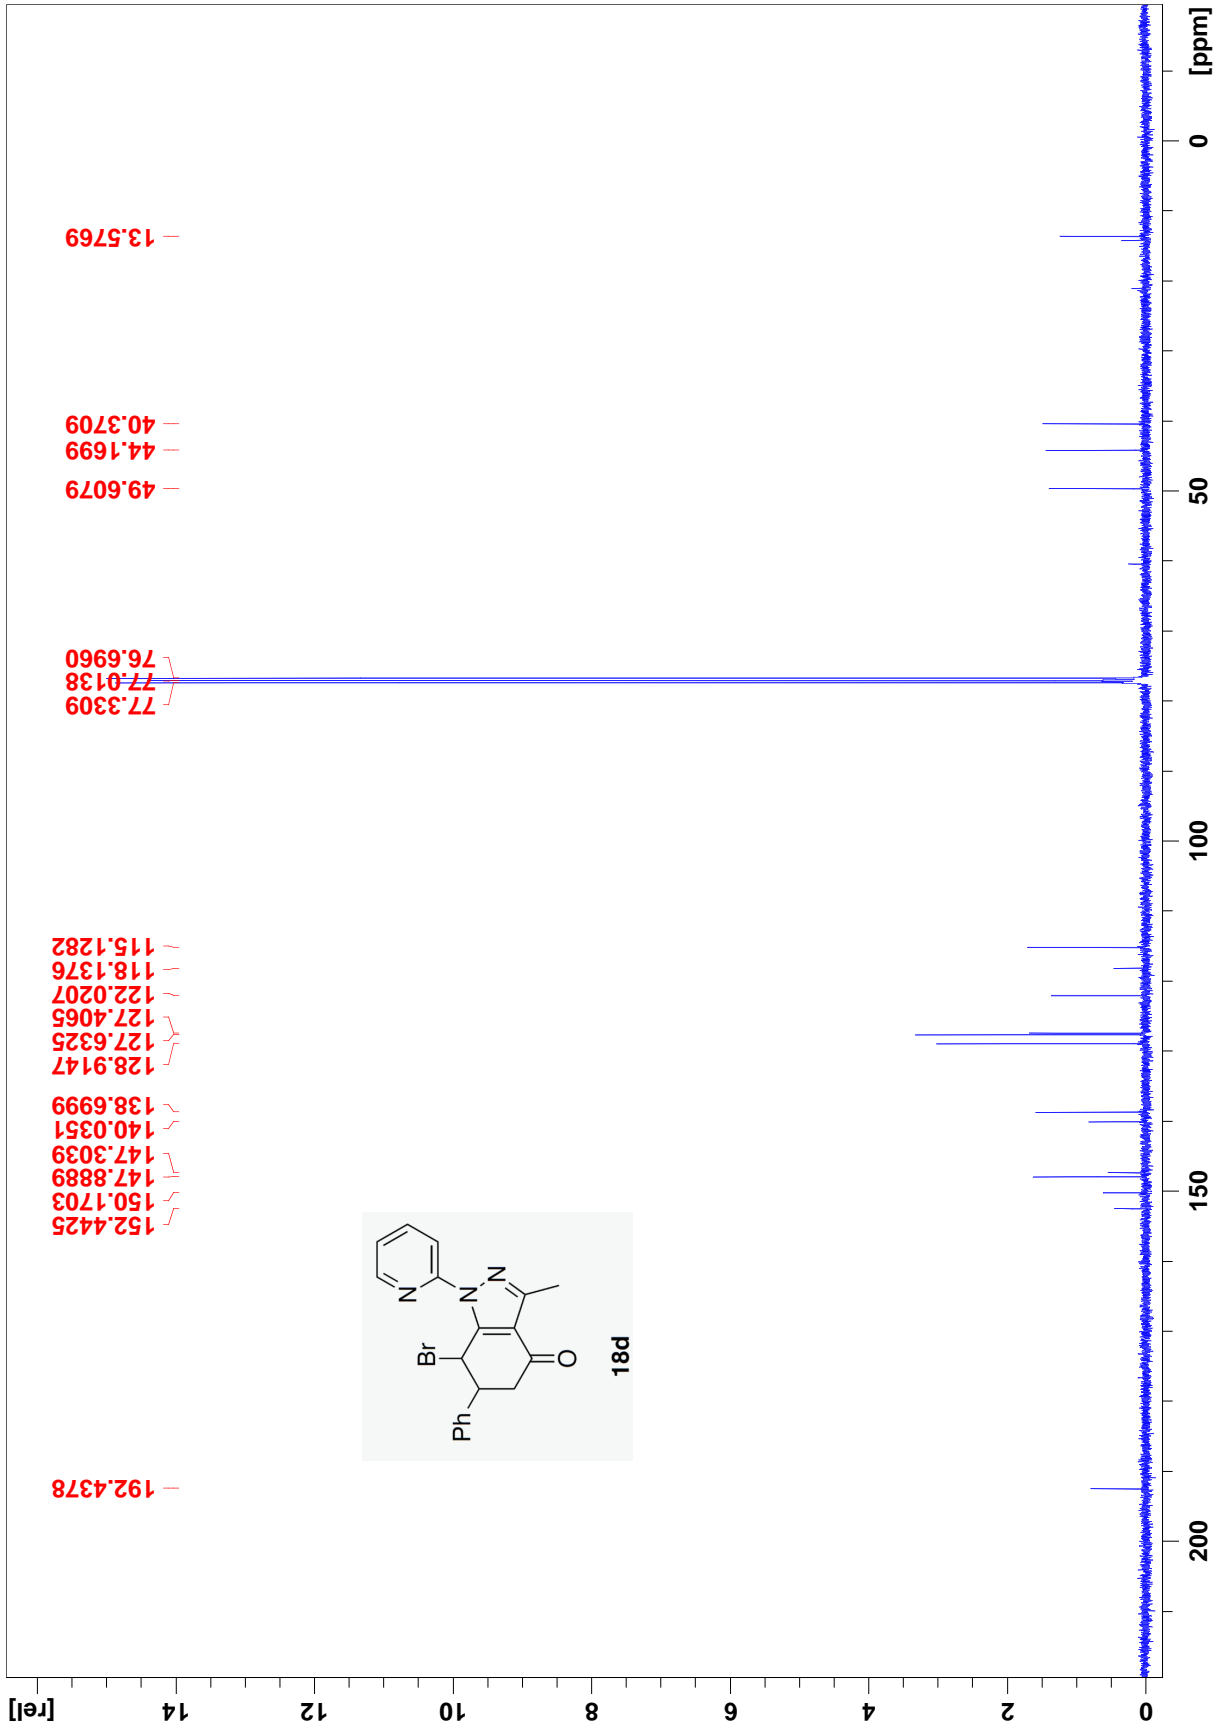

# 1H-NMR

JL09-100609-2 1 1 C:\Bruker\TOPSPIN leex3451

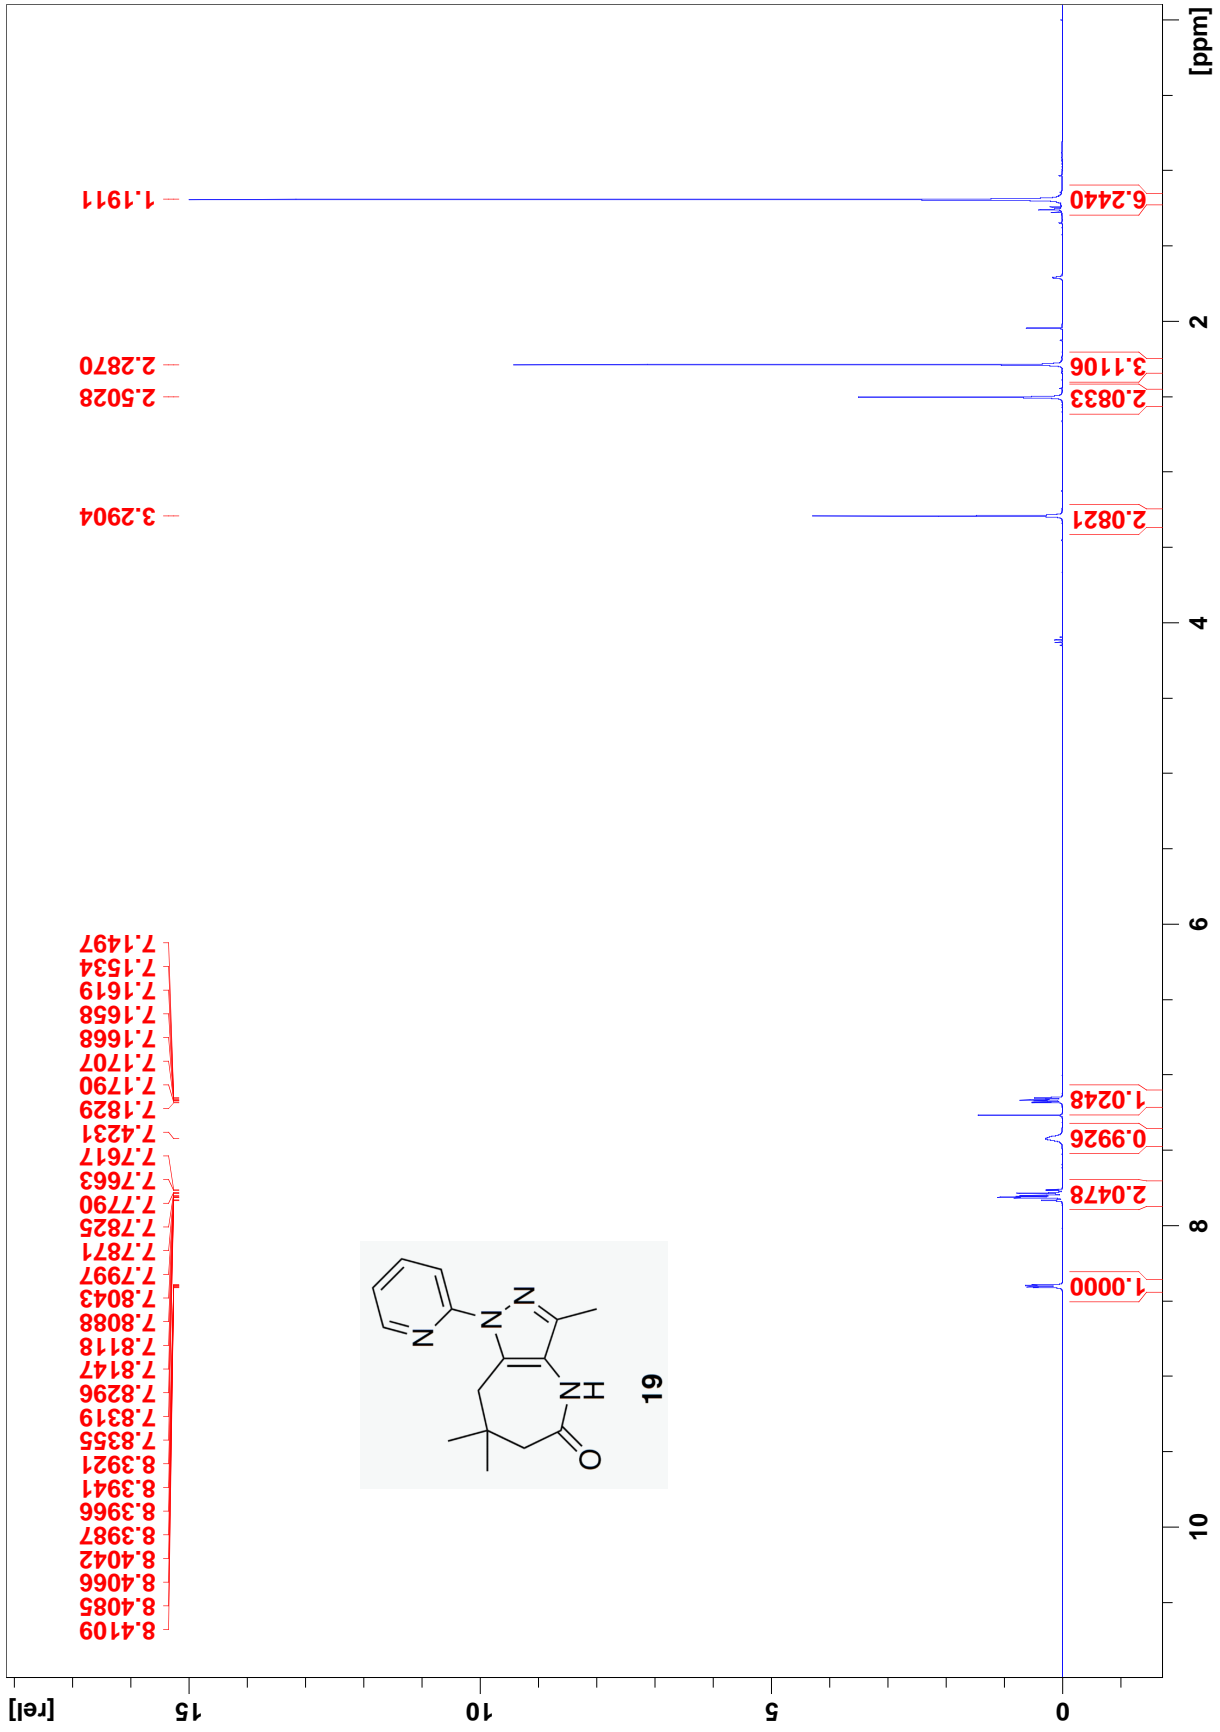

# 13C-NMR

JL09-100609-2 3 1 C:\Bruker\TOPSPIN leex3451

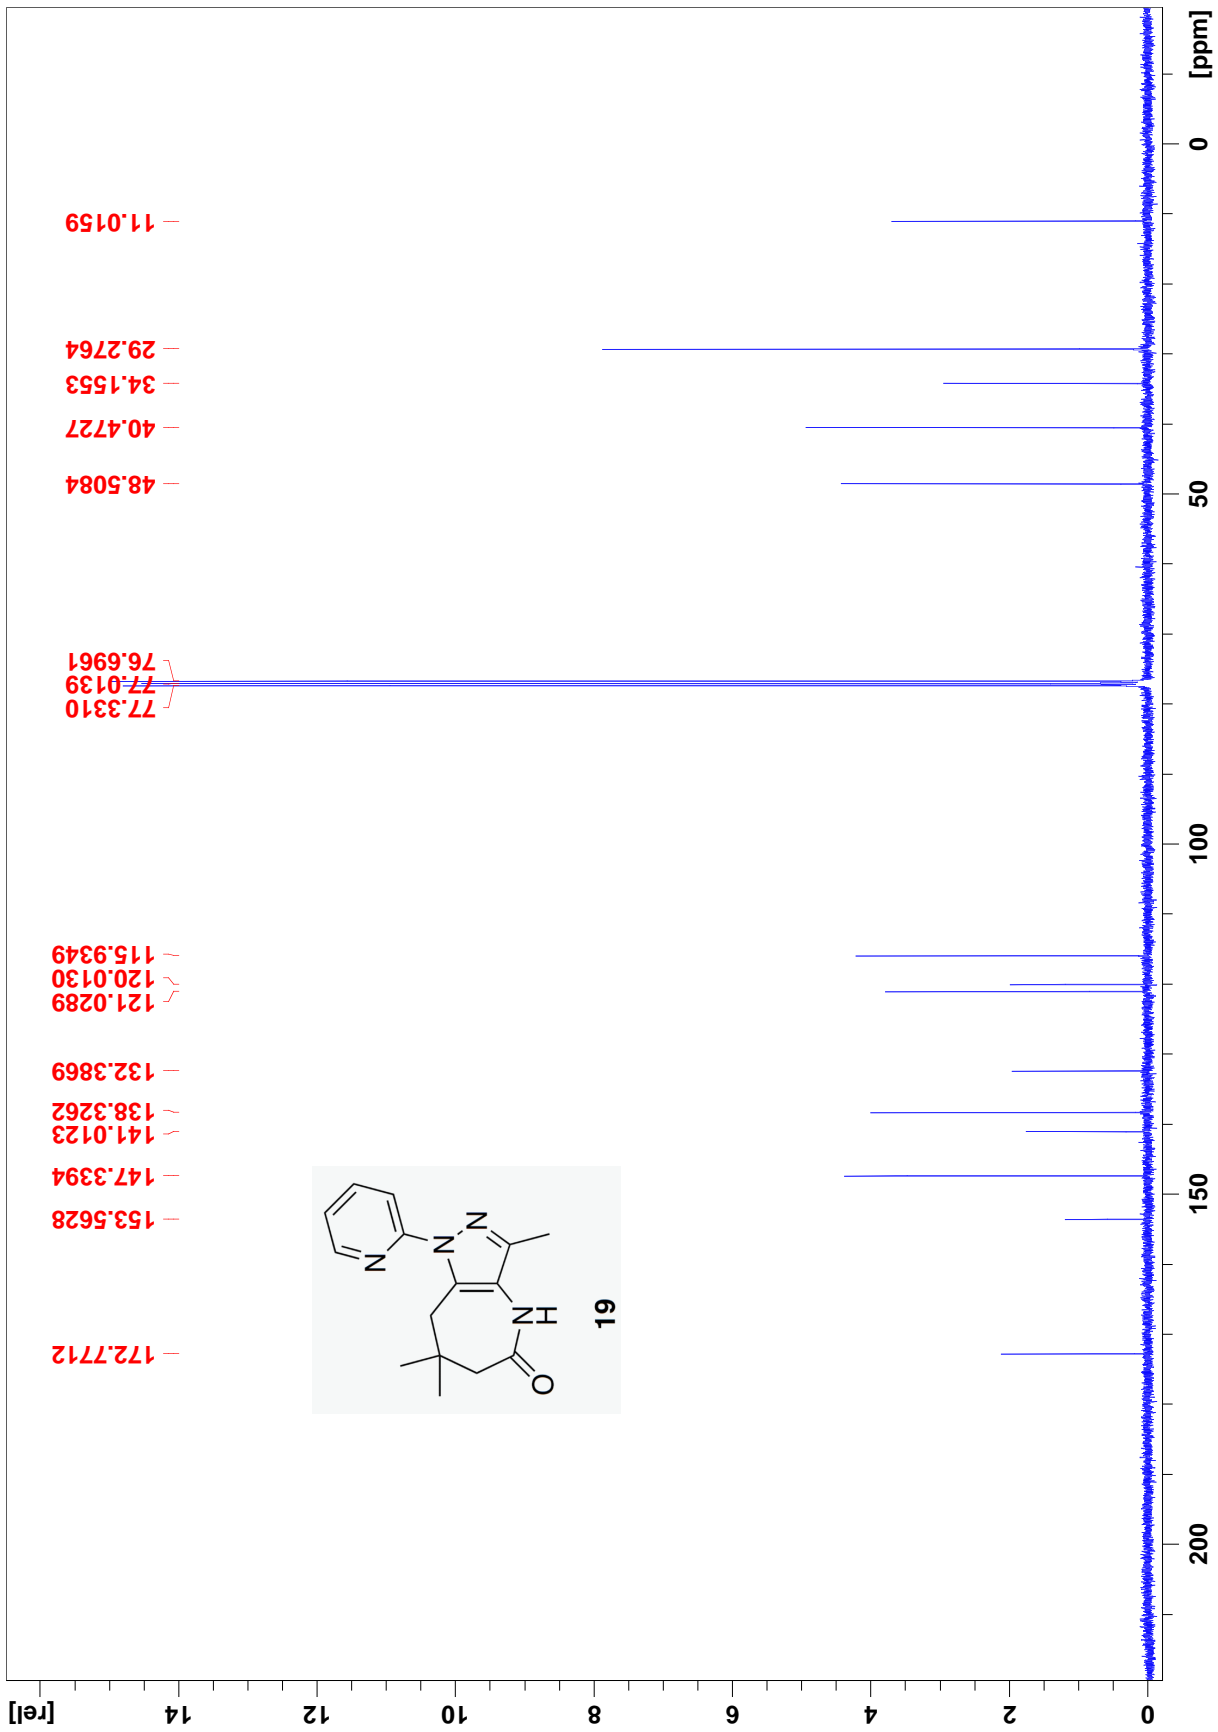

# 1H-NMR

JL09-100609-3 1 1 C:\Bruker\TOPSPIN leex3451

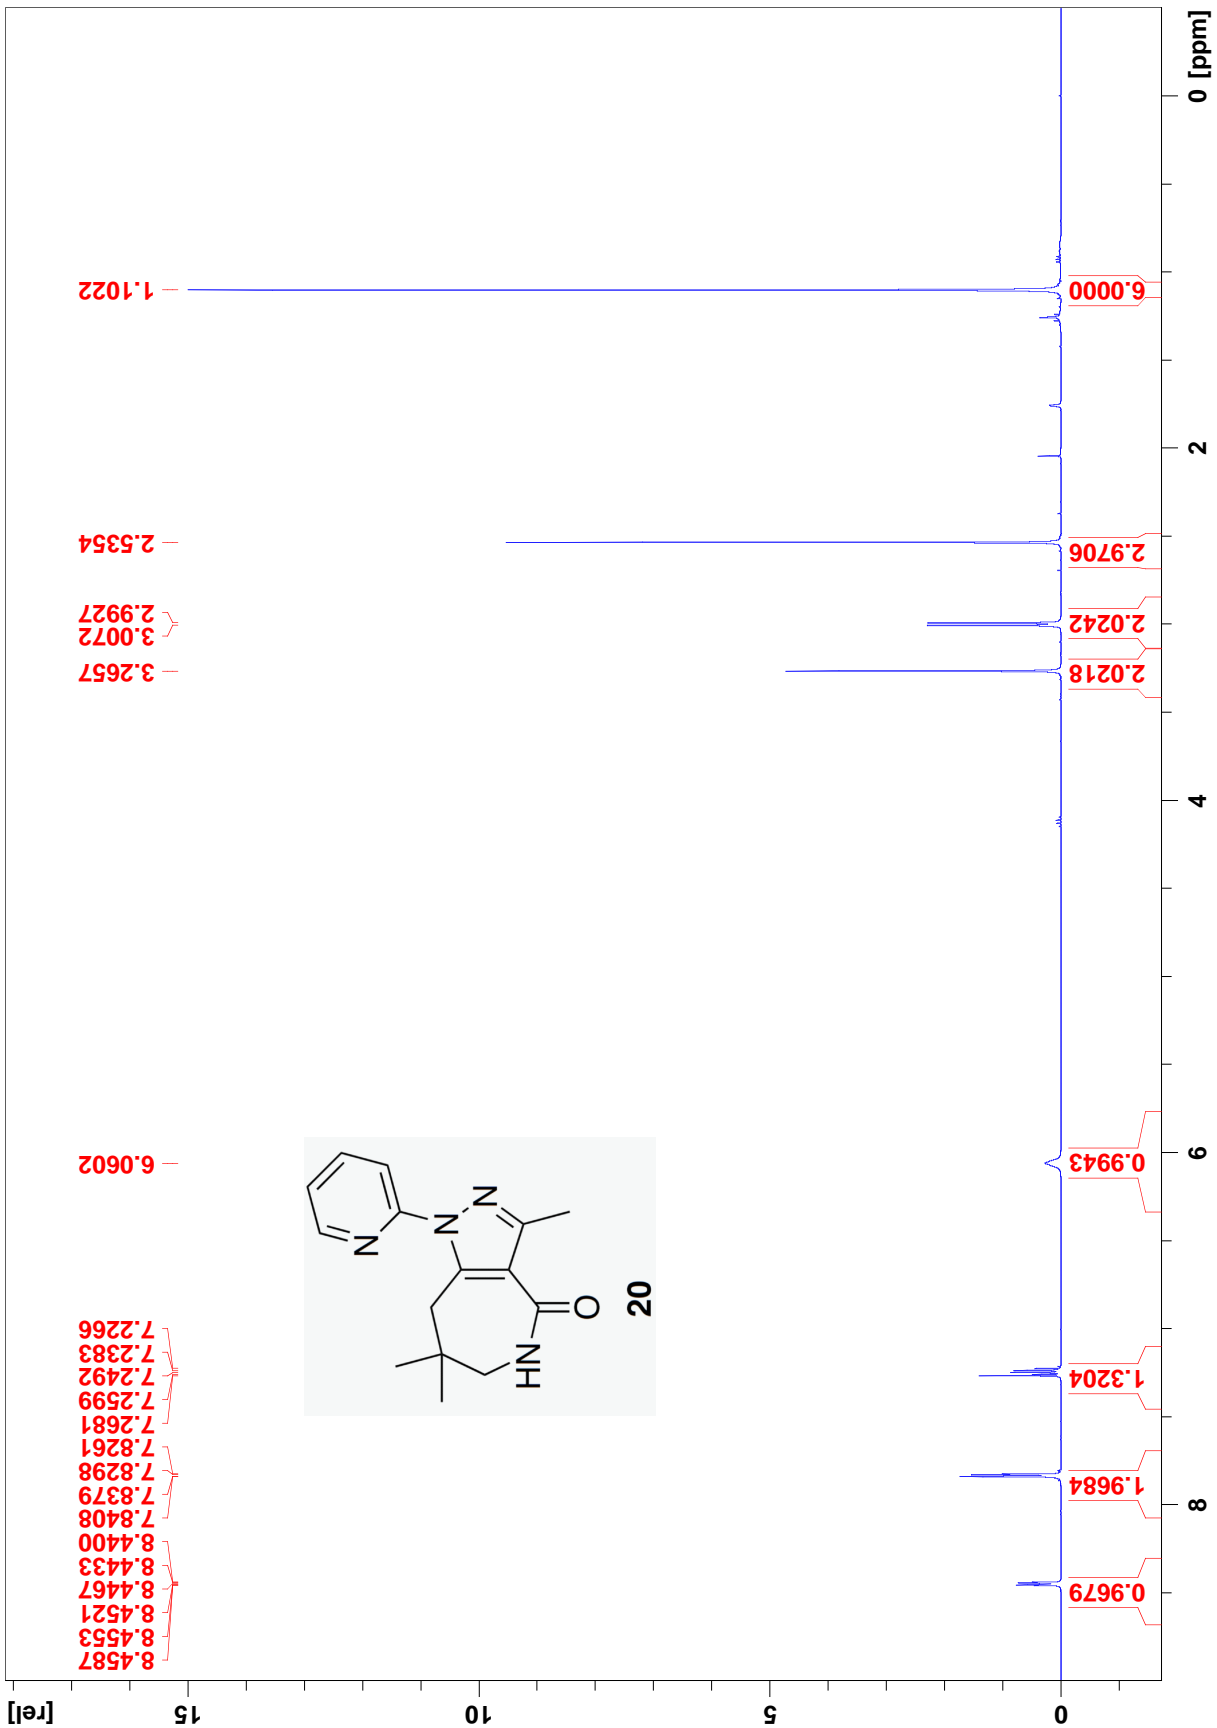



# 13C-NMR

JL09-100609-3 3 1 C:\Bruker\TOPSPIN leex3451

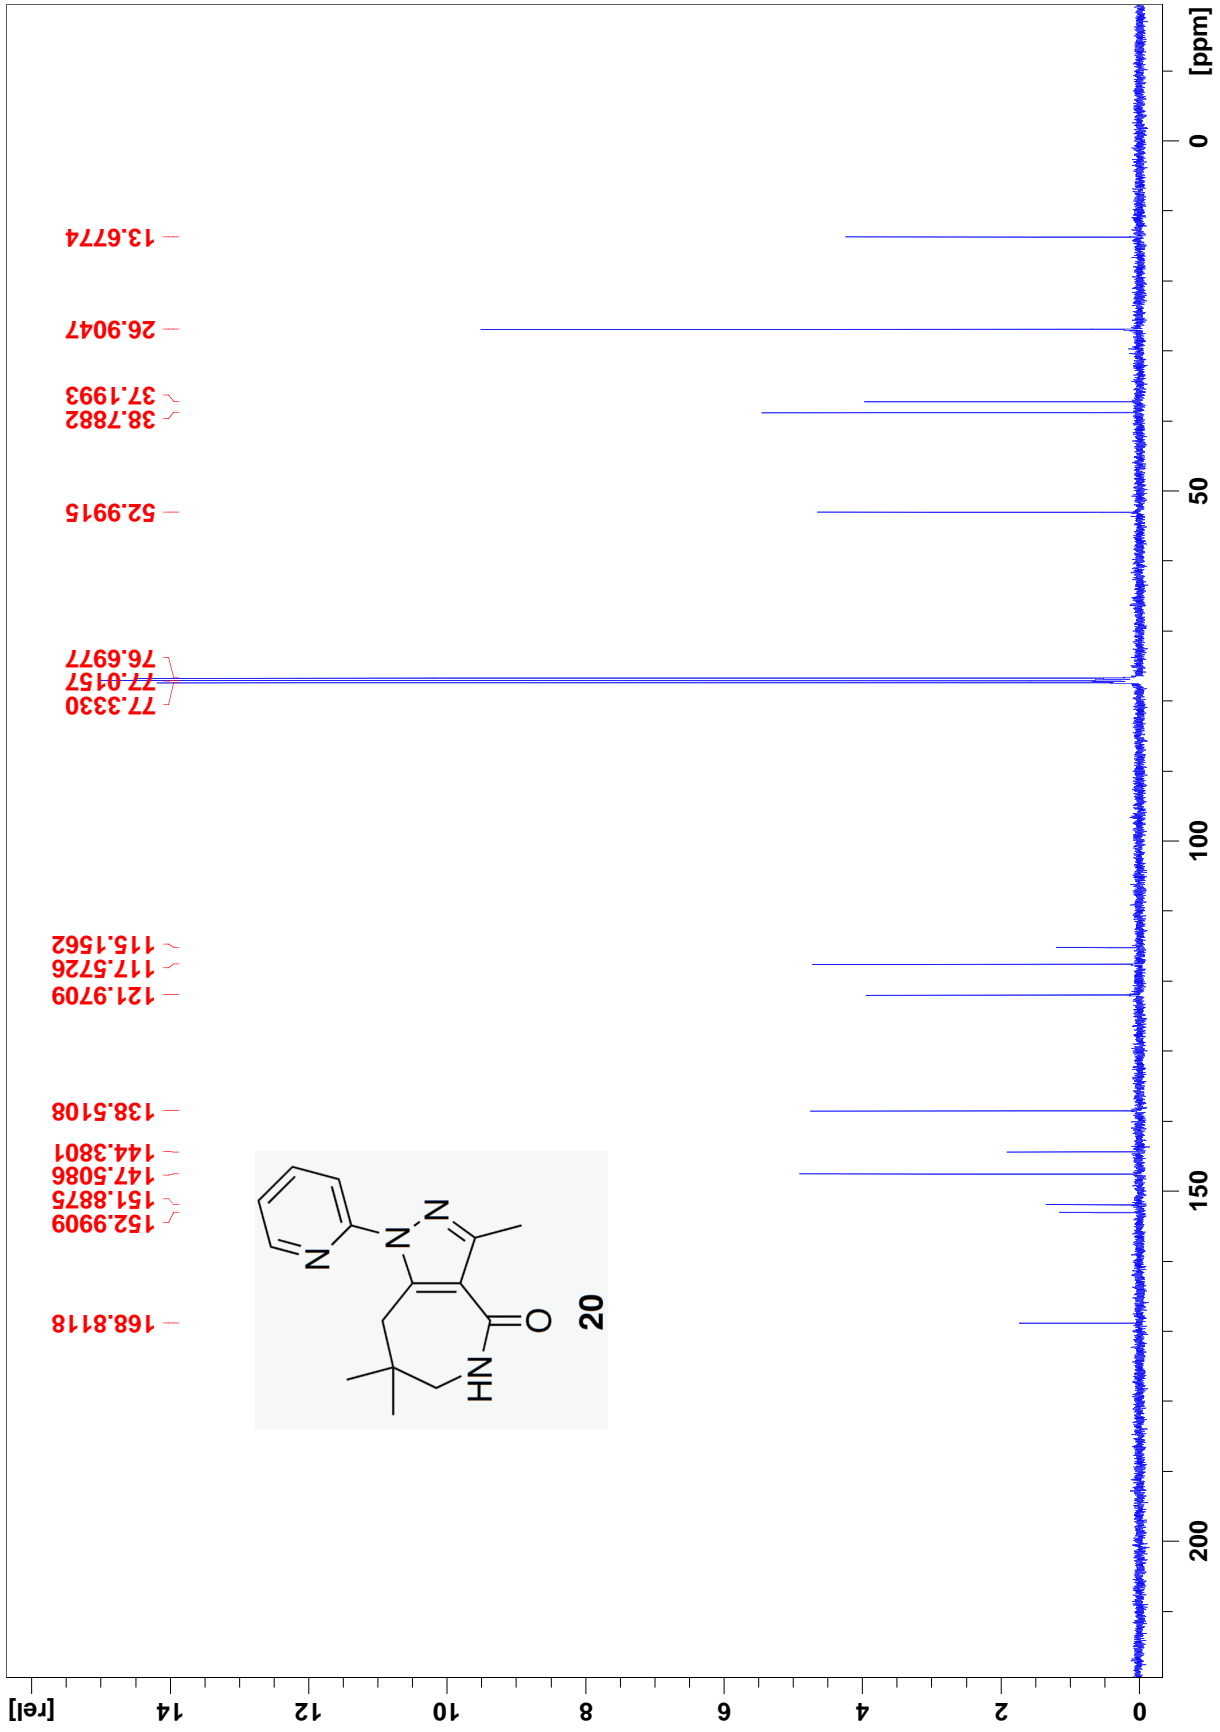

# 1H-NMR

JL09-101409A 1 1 C:\Bruker\TOPSPIN leex3451

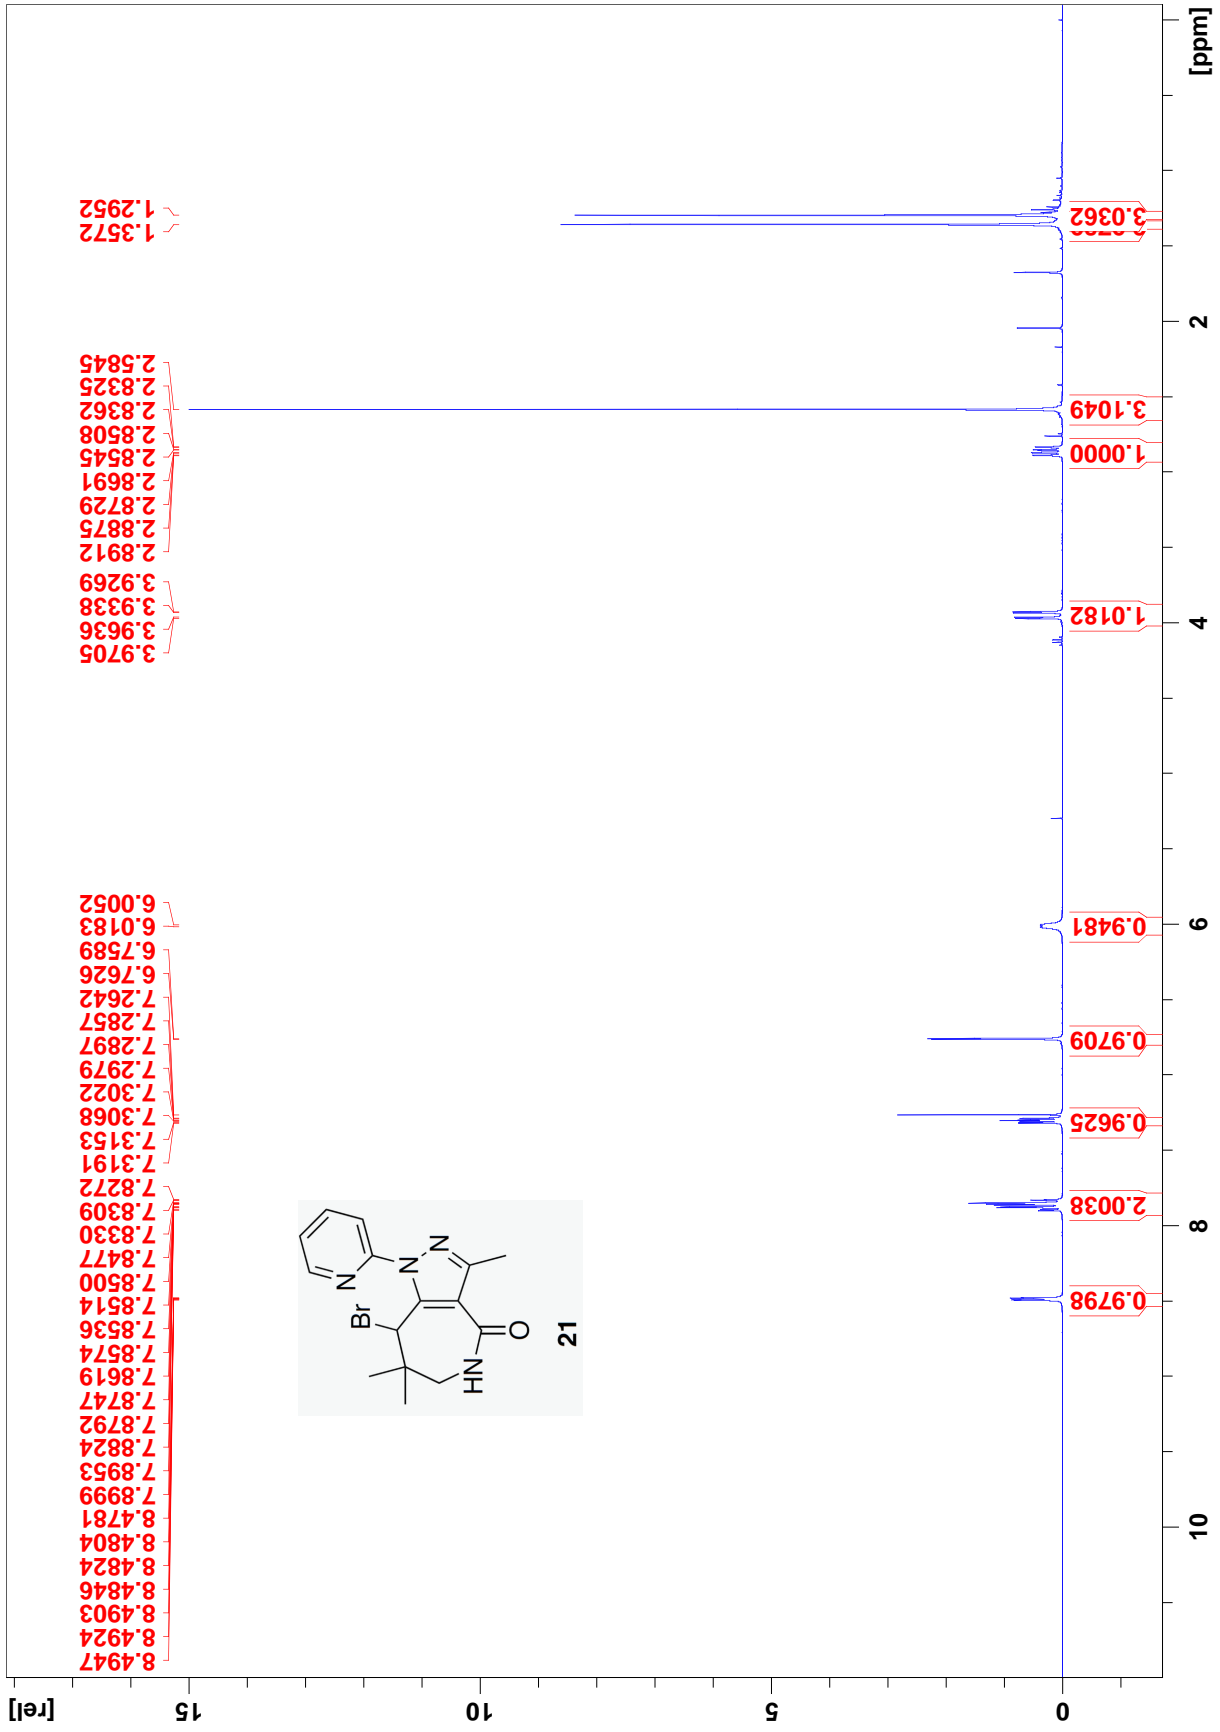

# 13C-NMR

JL09-101409A 3 1 C:\Bruker\TOPSPIN leex3451

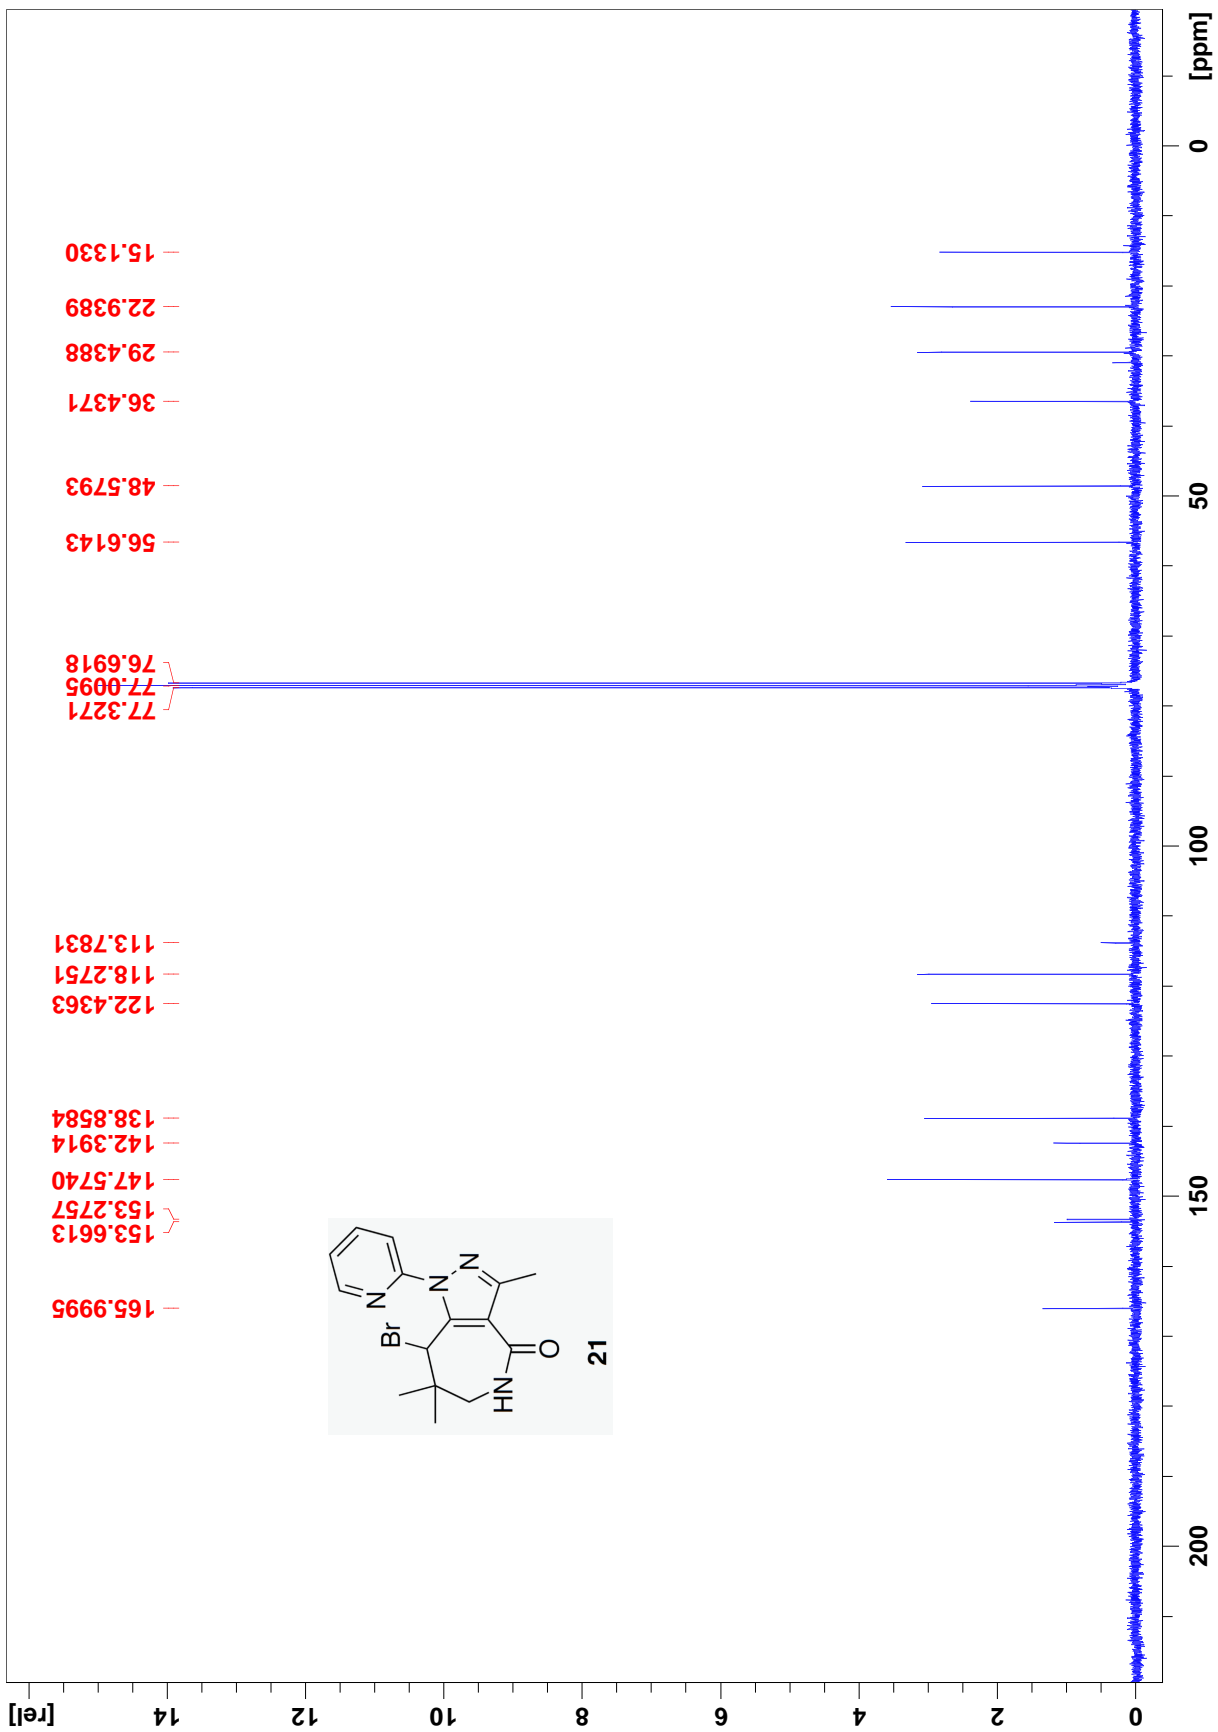

# 1H-NMR

JL08-072608A 1 1 C:\Bruker\TOPSPIN leex3451

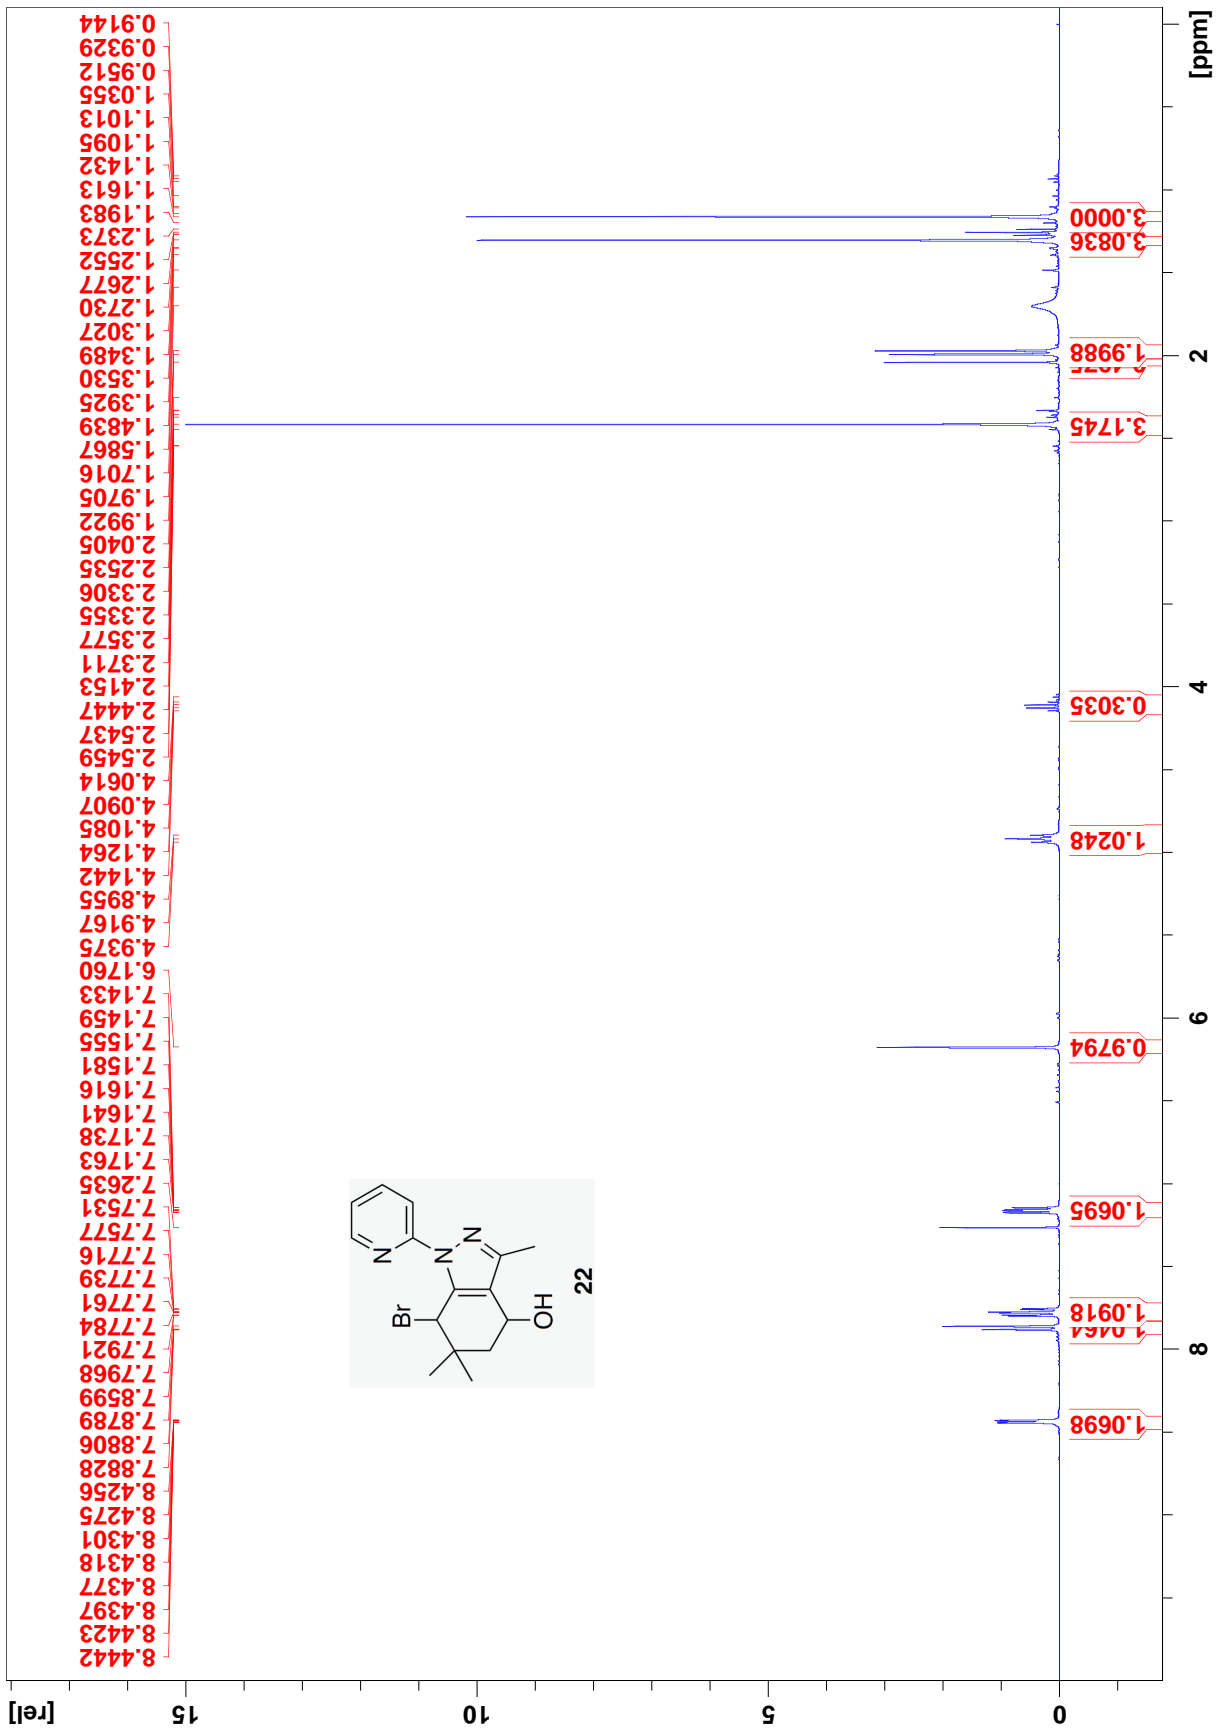

# 13C-NMR

JL08-072608A 3 1 C:\Bruker\TOPSPIN leex3451

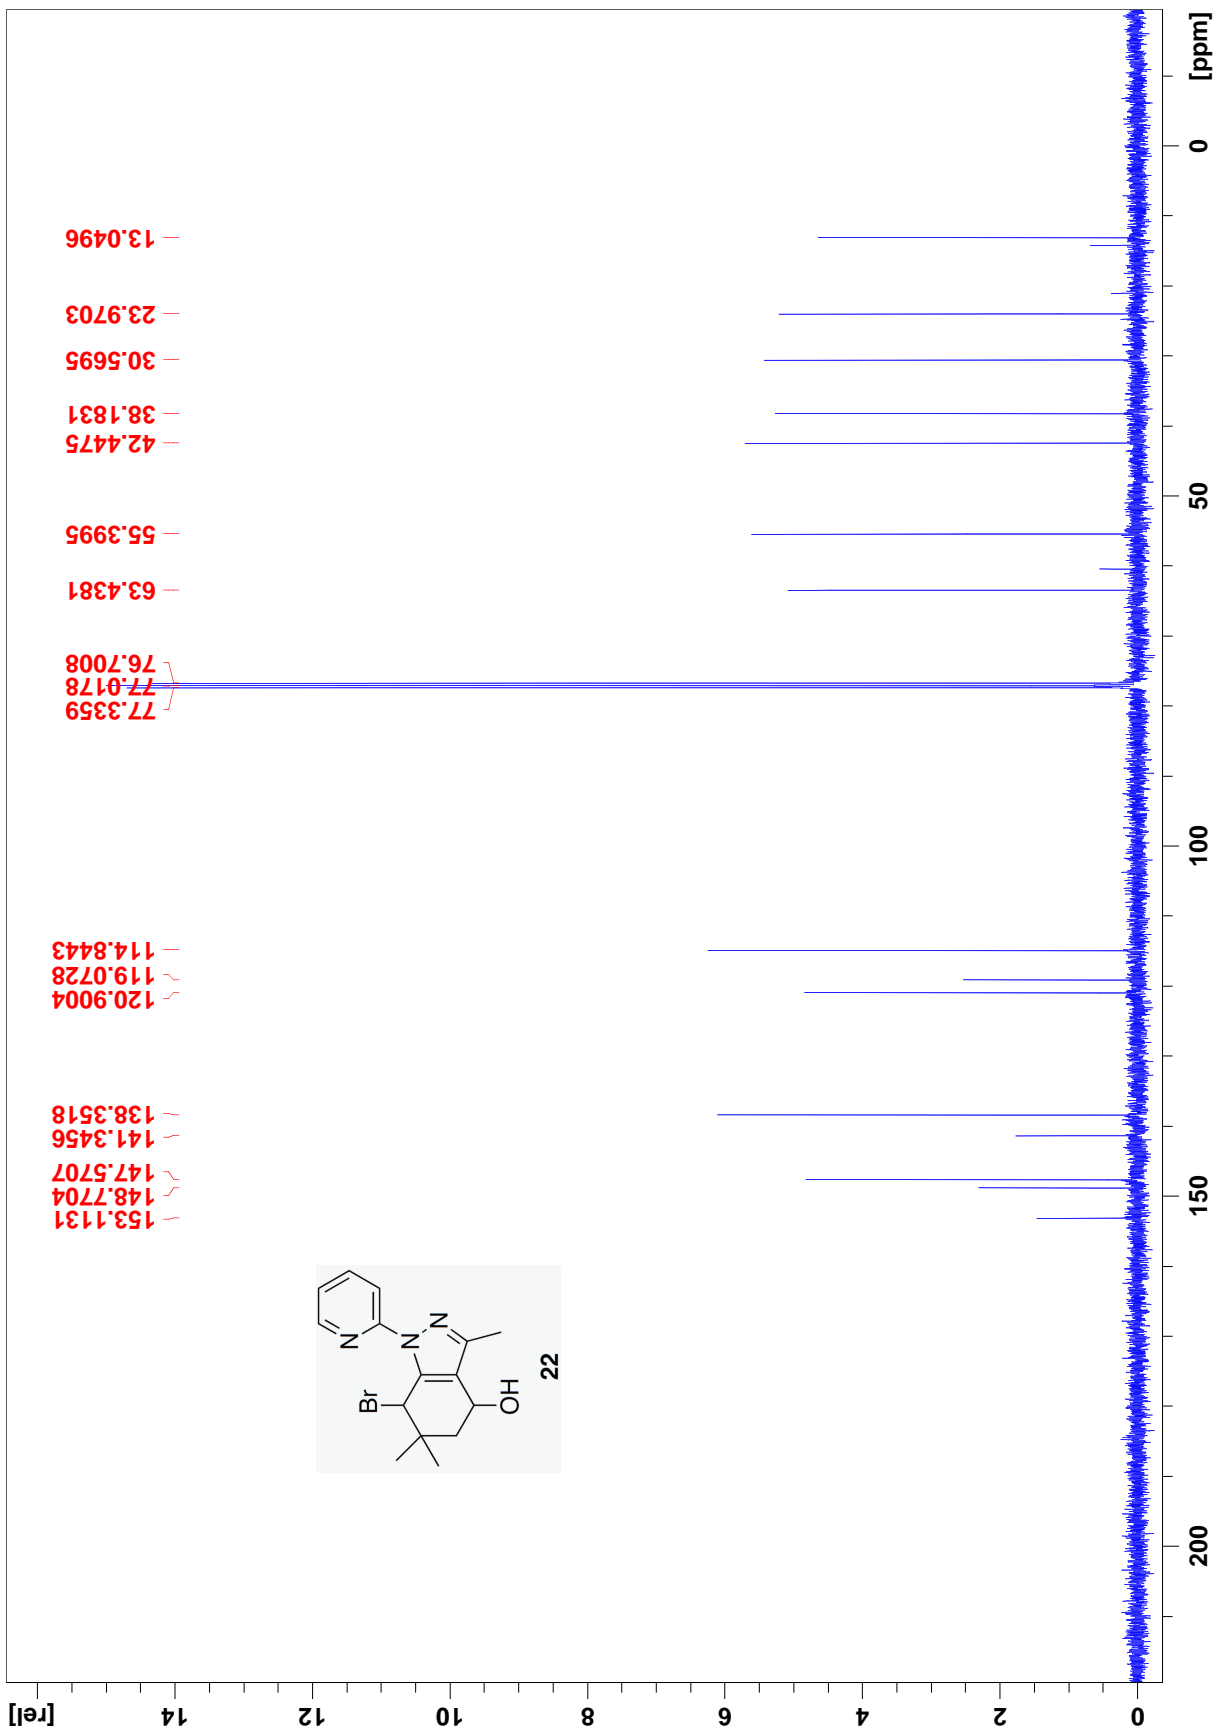

# 1H-NMR

JL08-091808B 1 1 C:\Bruker\TOPSPIN leex3451

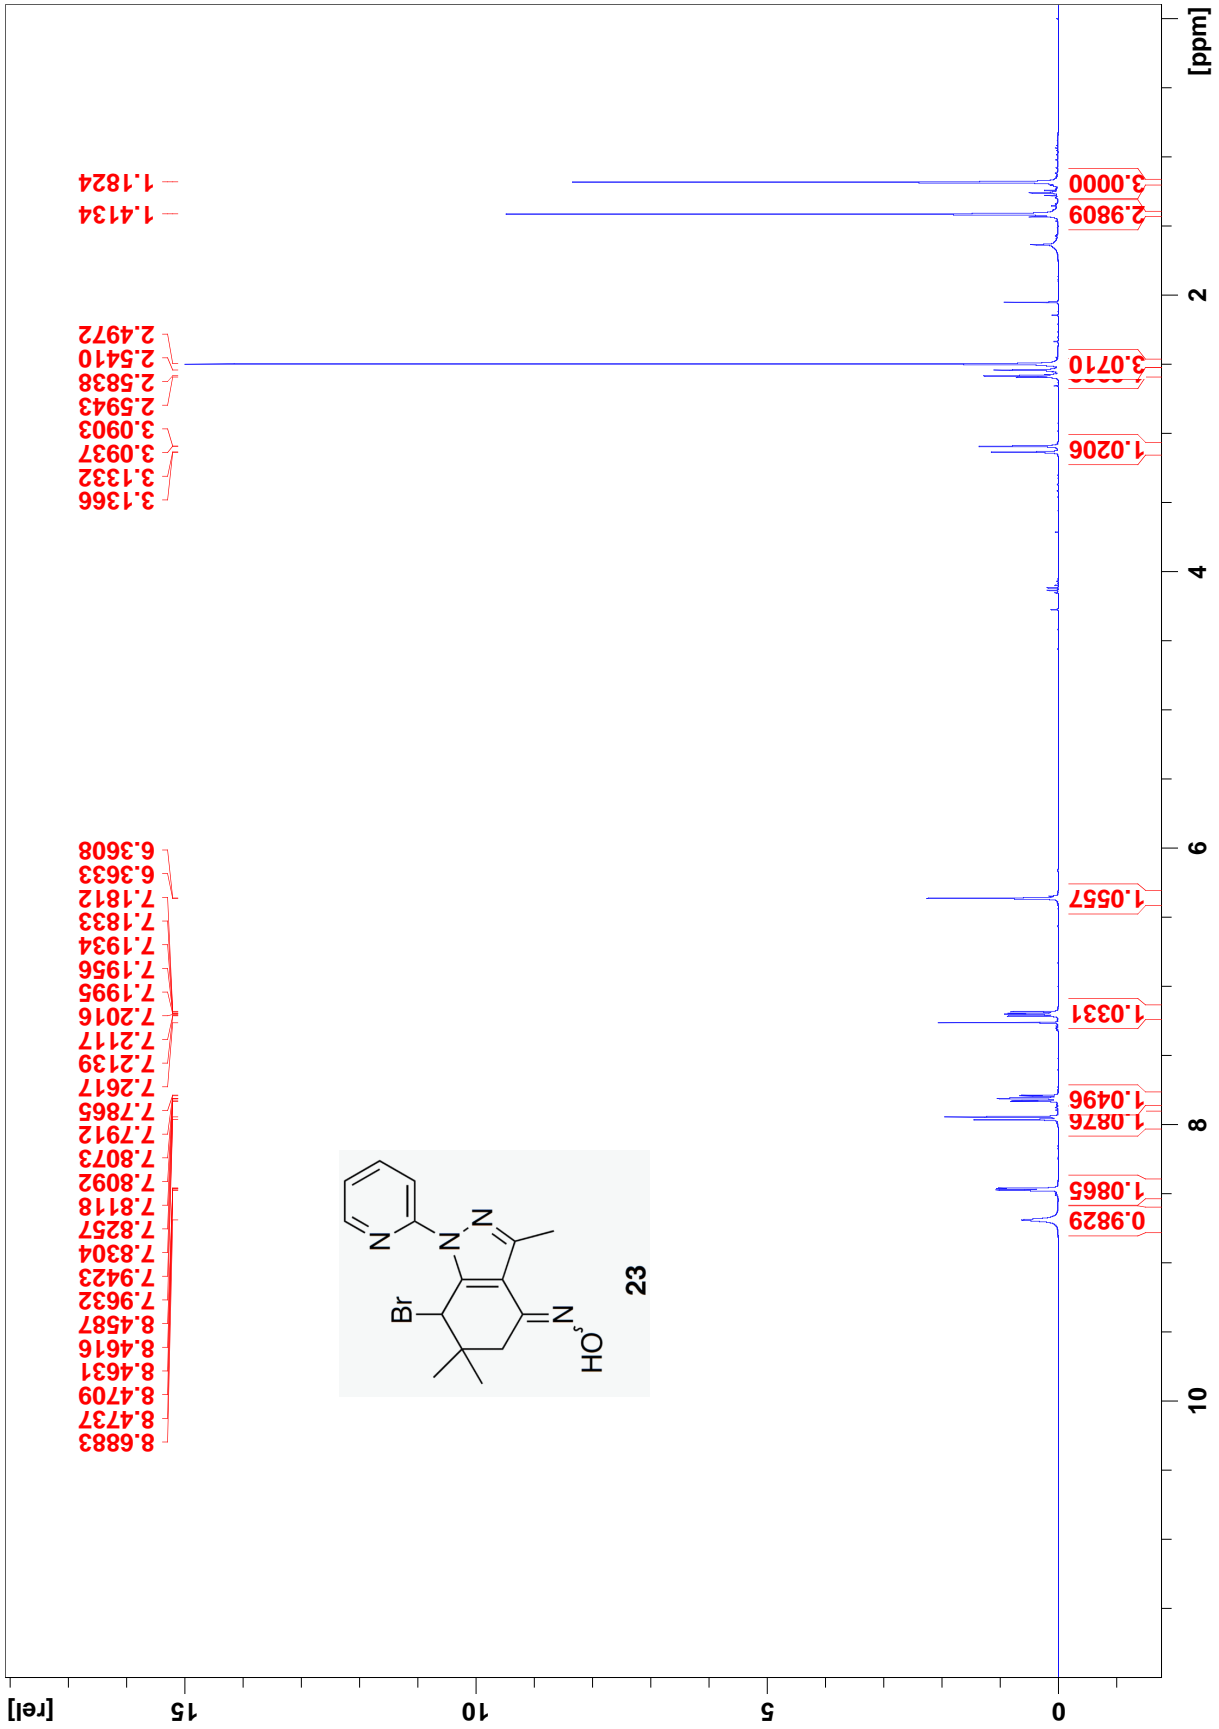

# 13C-NMR

JL08-091808B 5 1 C:\Bruker\TOPSPIN leex3451

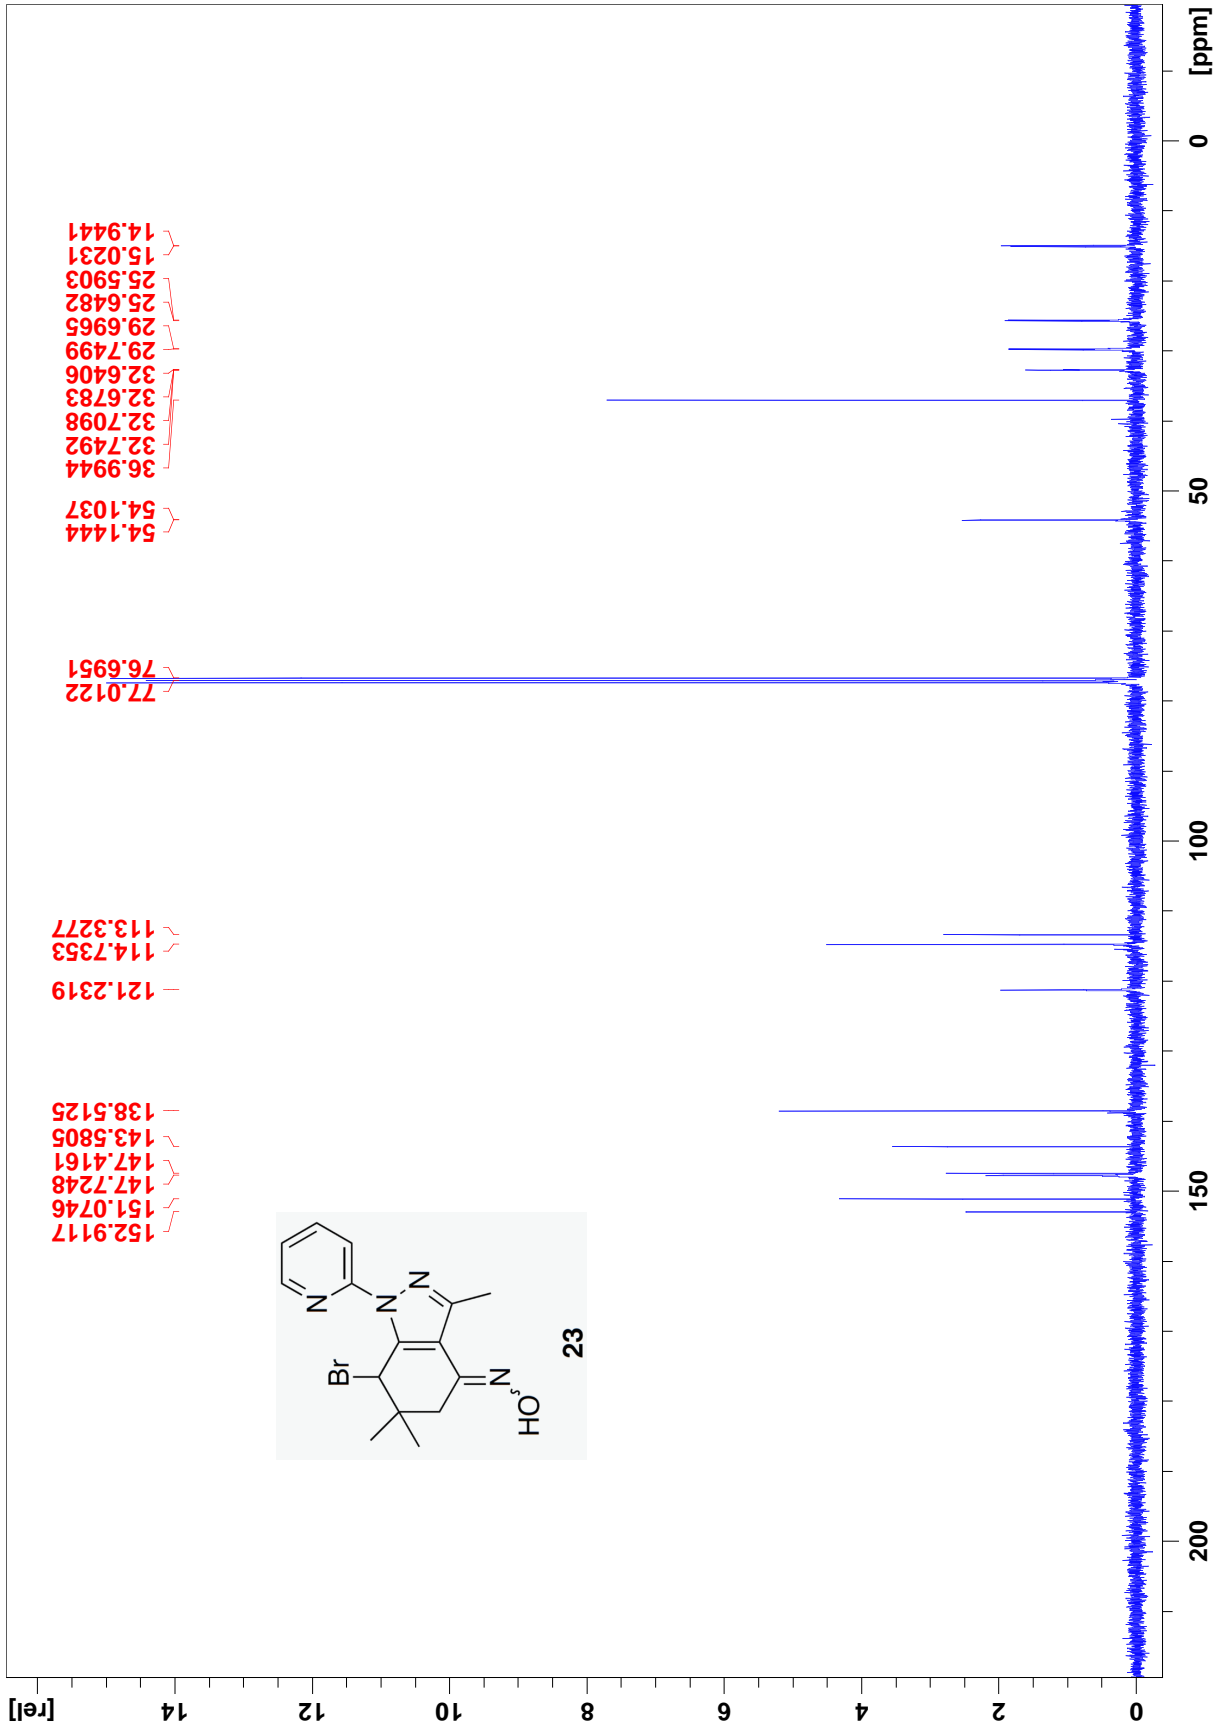

# 1H-NMR

JL08-101408 1 1 C:\Bruker\TOPSPIN leex3451

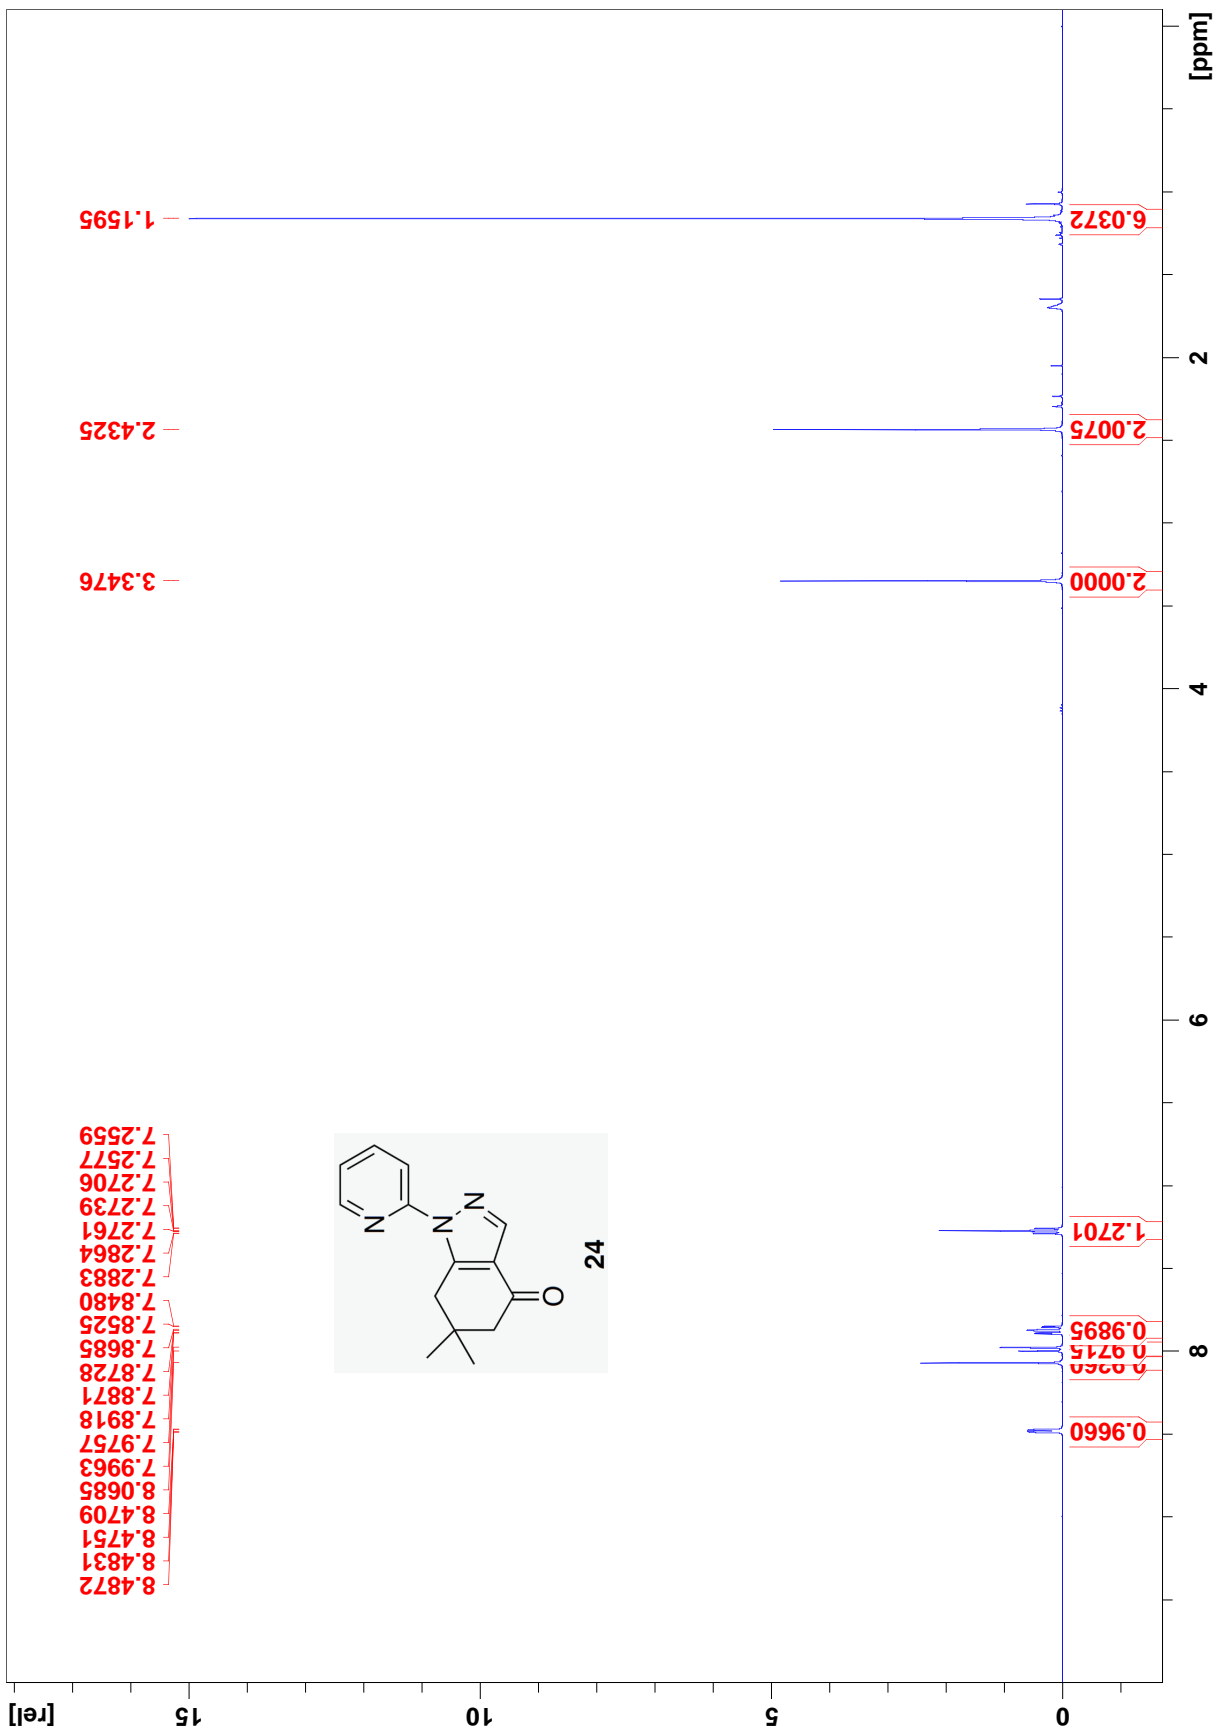



# 13C-NMR

JL08-101408 3 1 C:\Bruker\TOPSPIN leex3451

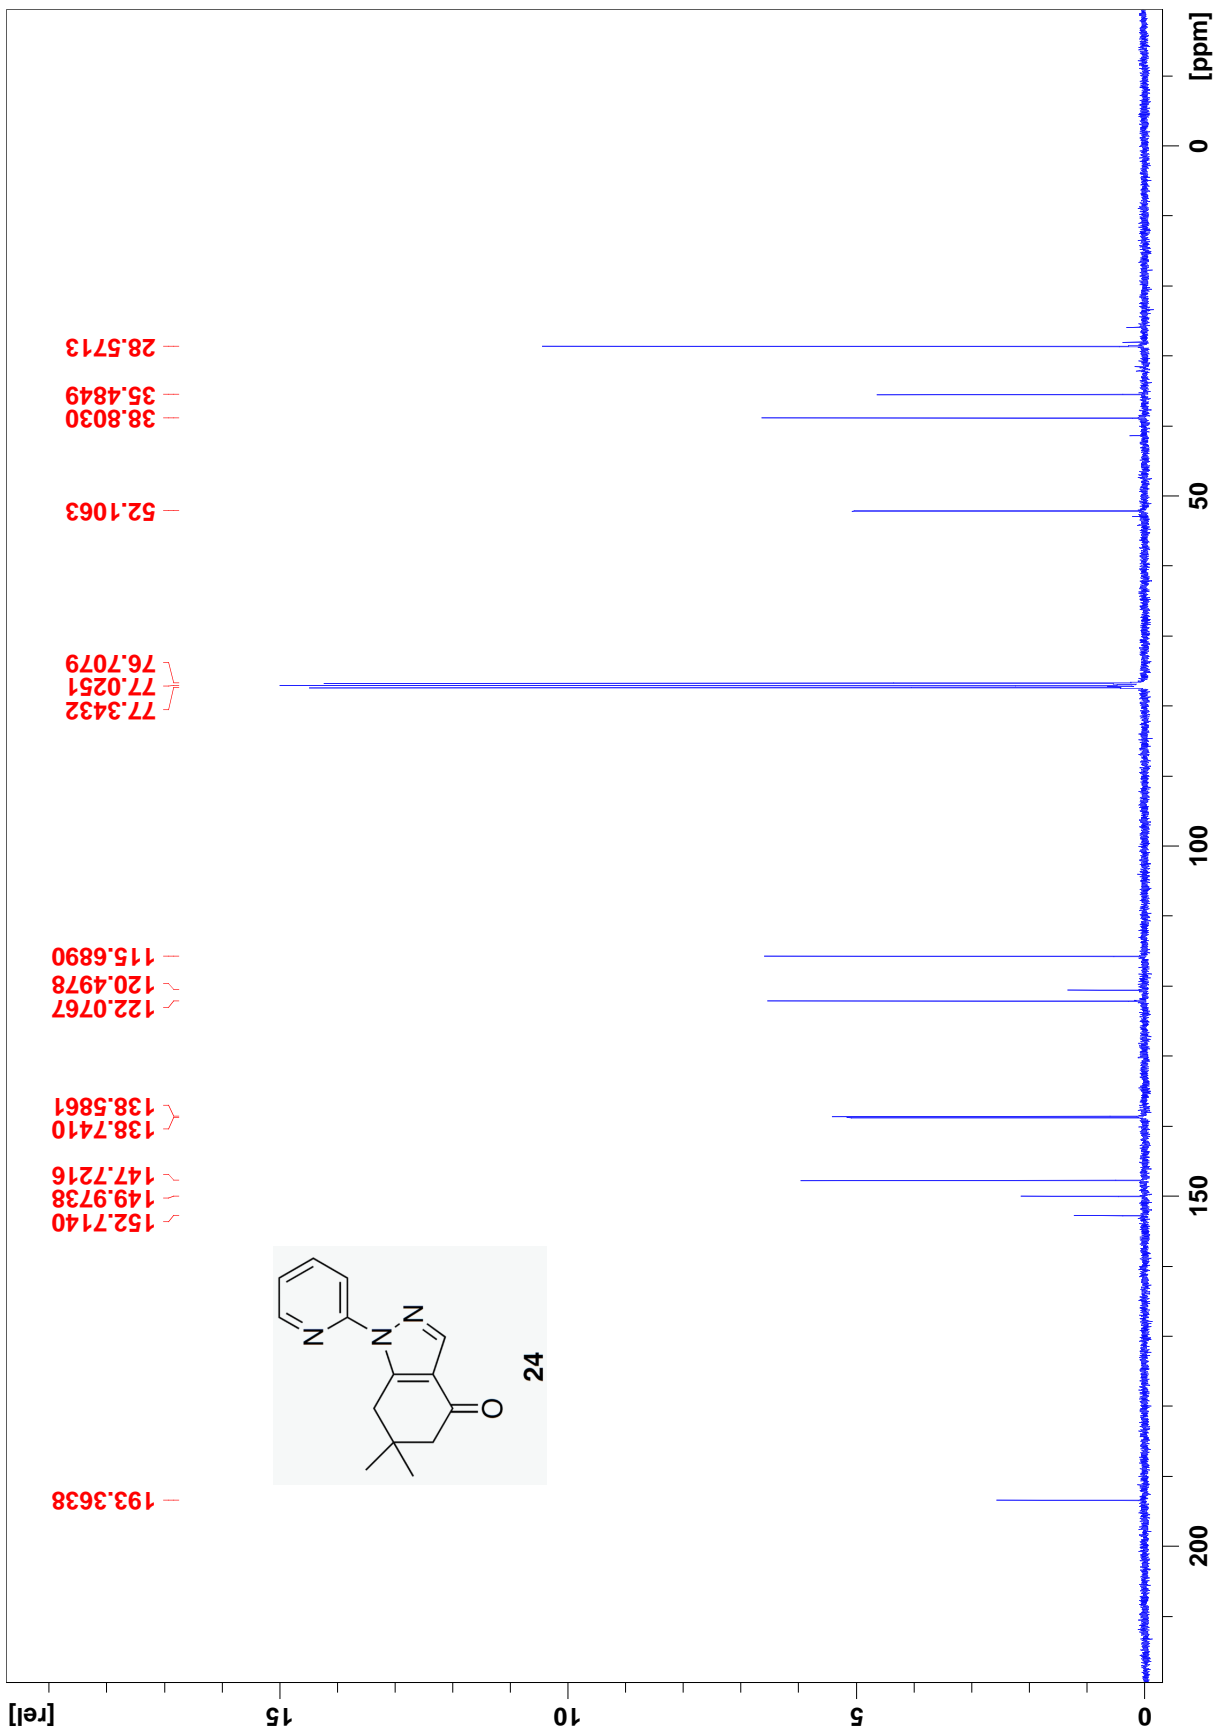

# 1H-NMR

JL08-101508-1 1 1 C:\Bruker\TOPSPIN leex3451

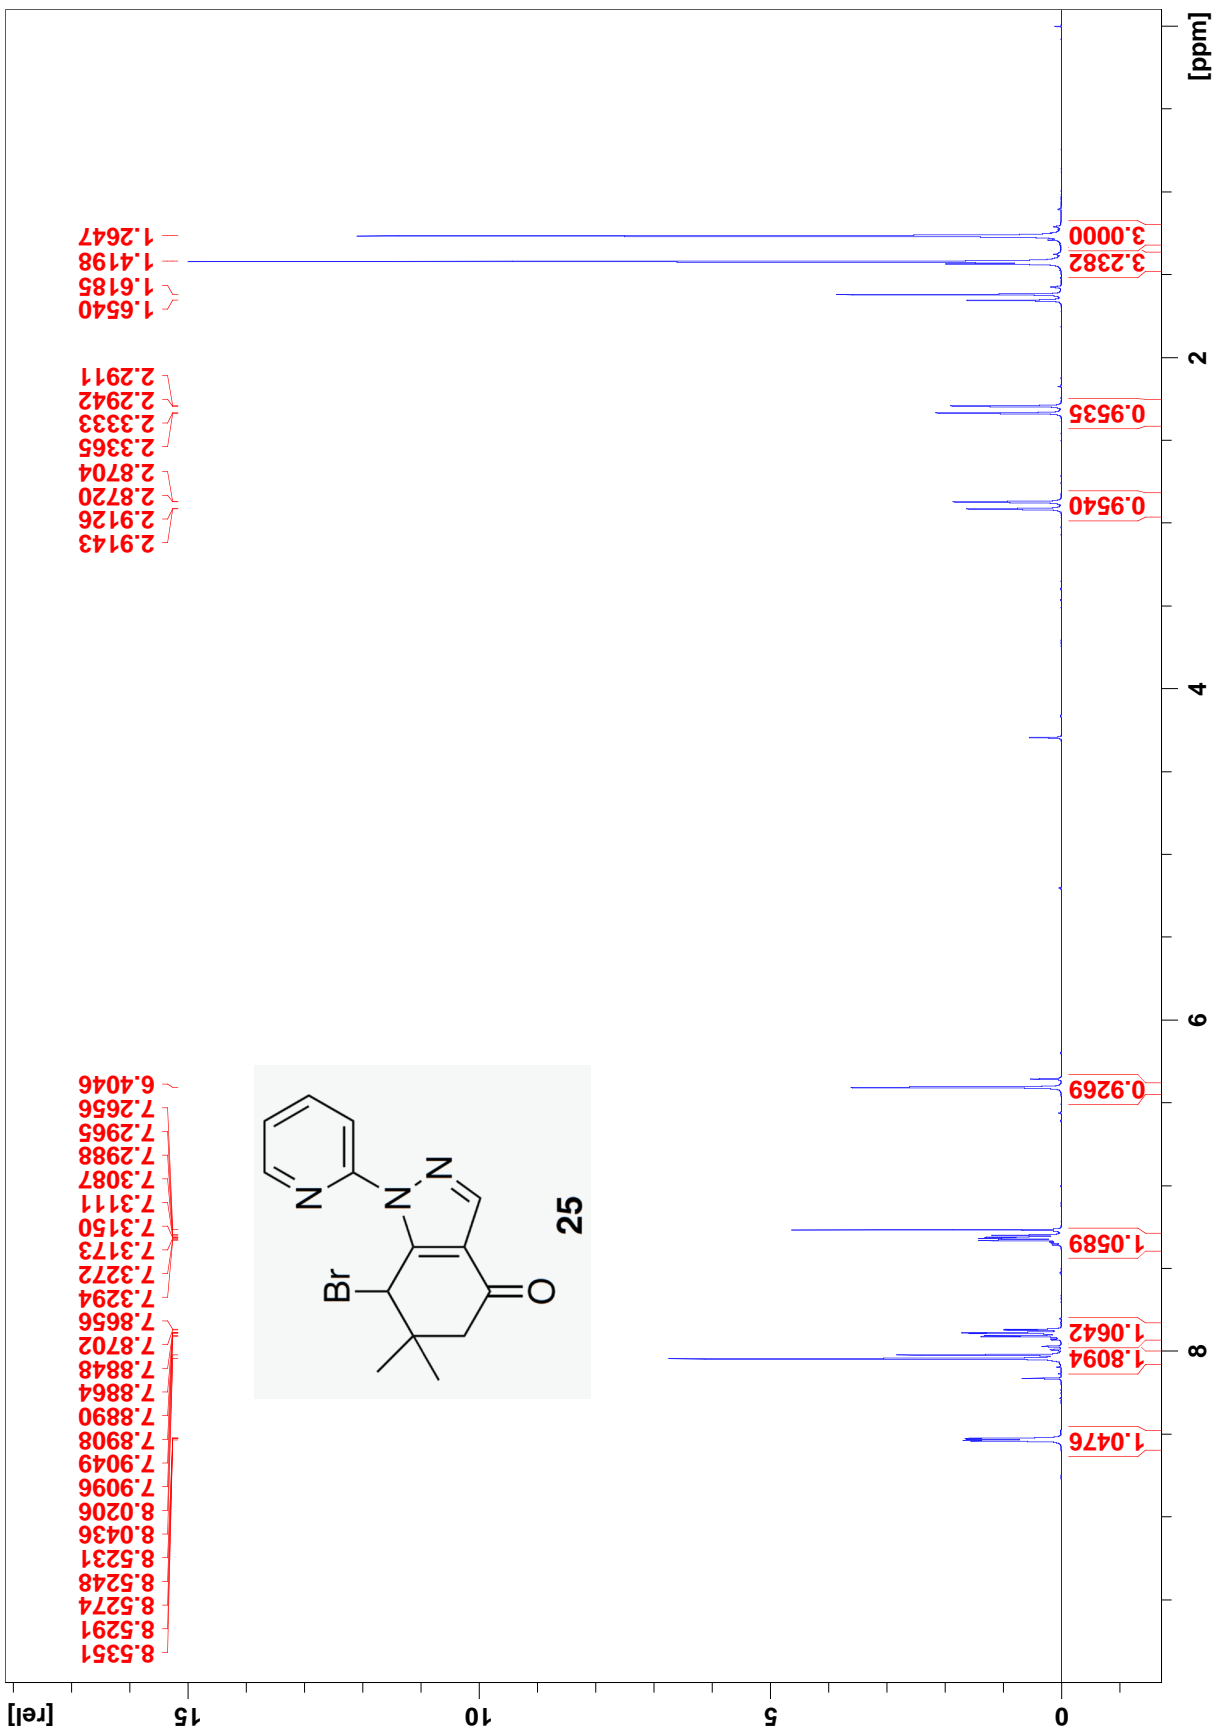

# 13C-NMR

JL08-101508-1 4 1 C:\Bruker\TOPSPIN leex3451

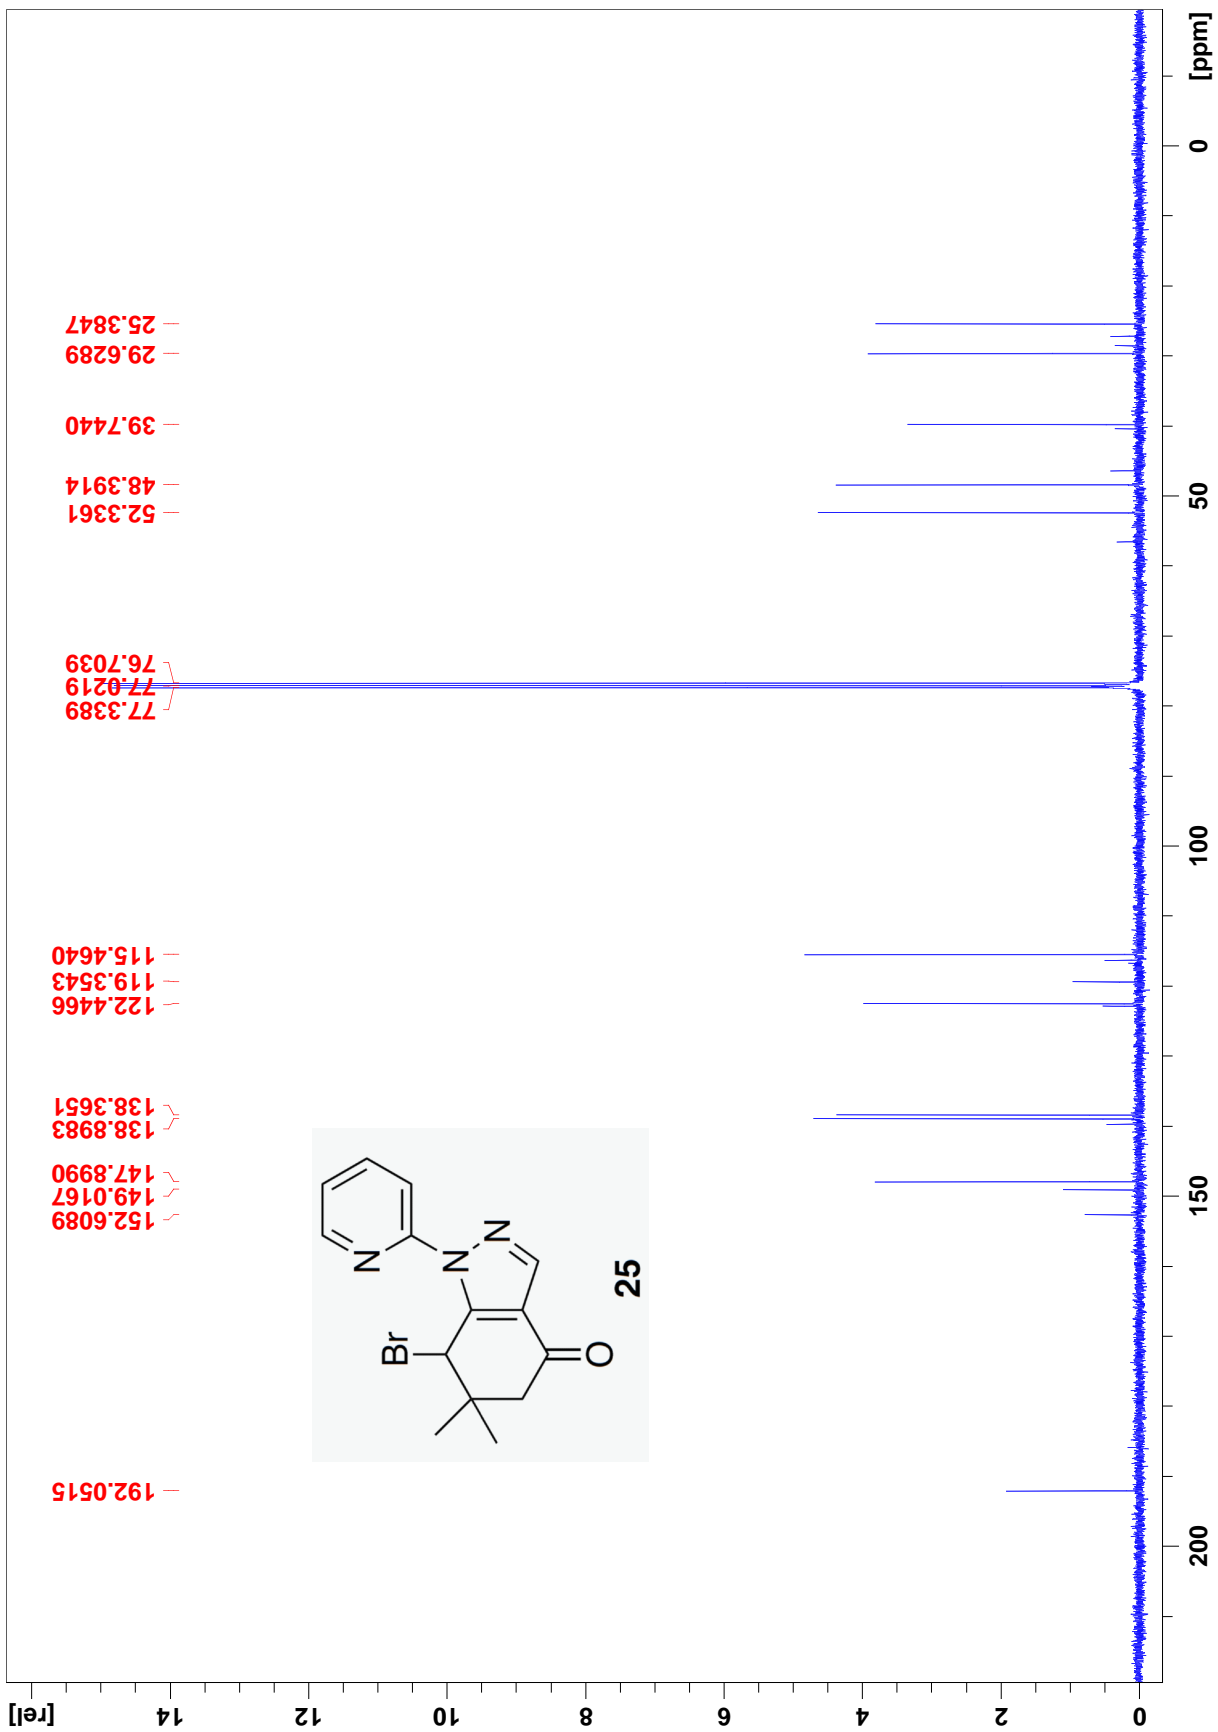

# 1H-NMR

JL08-11.2608 1 1 C:\Bruker\TOPSPIN leex3451

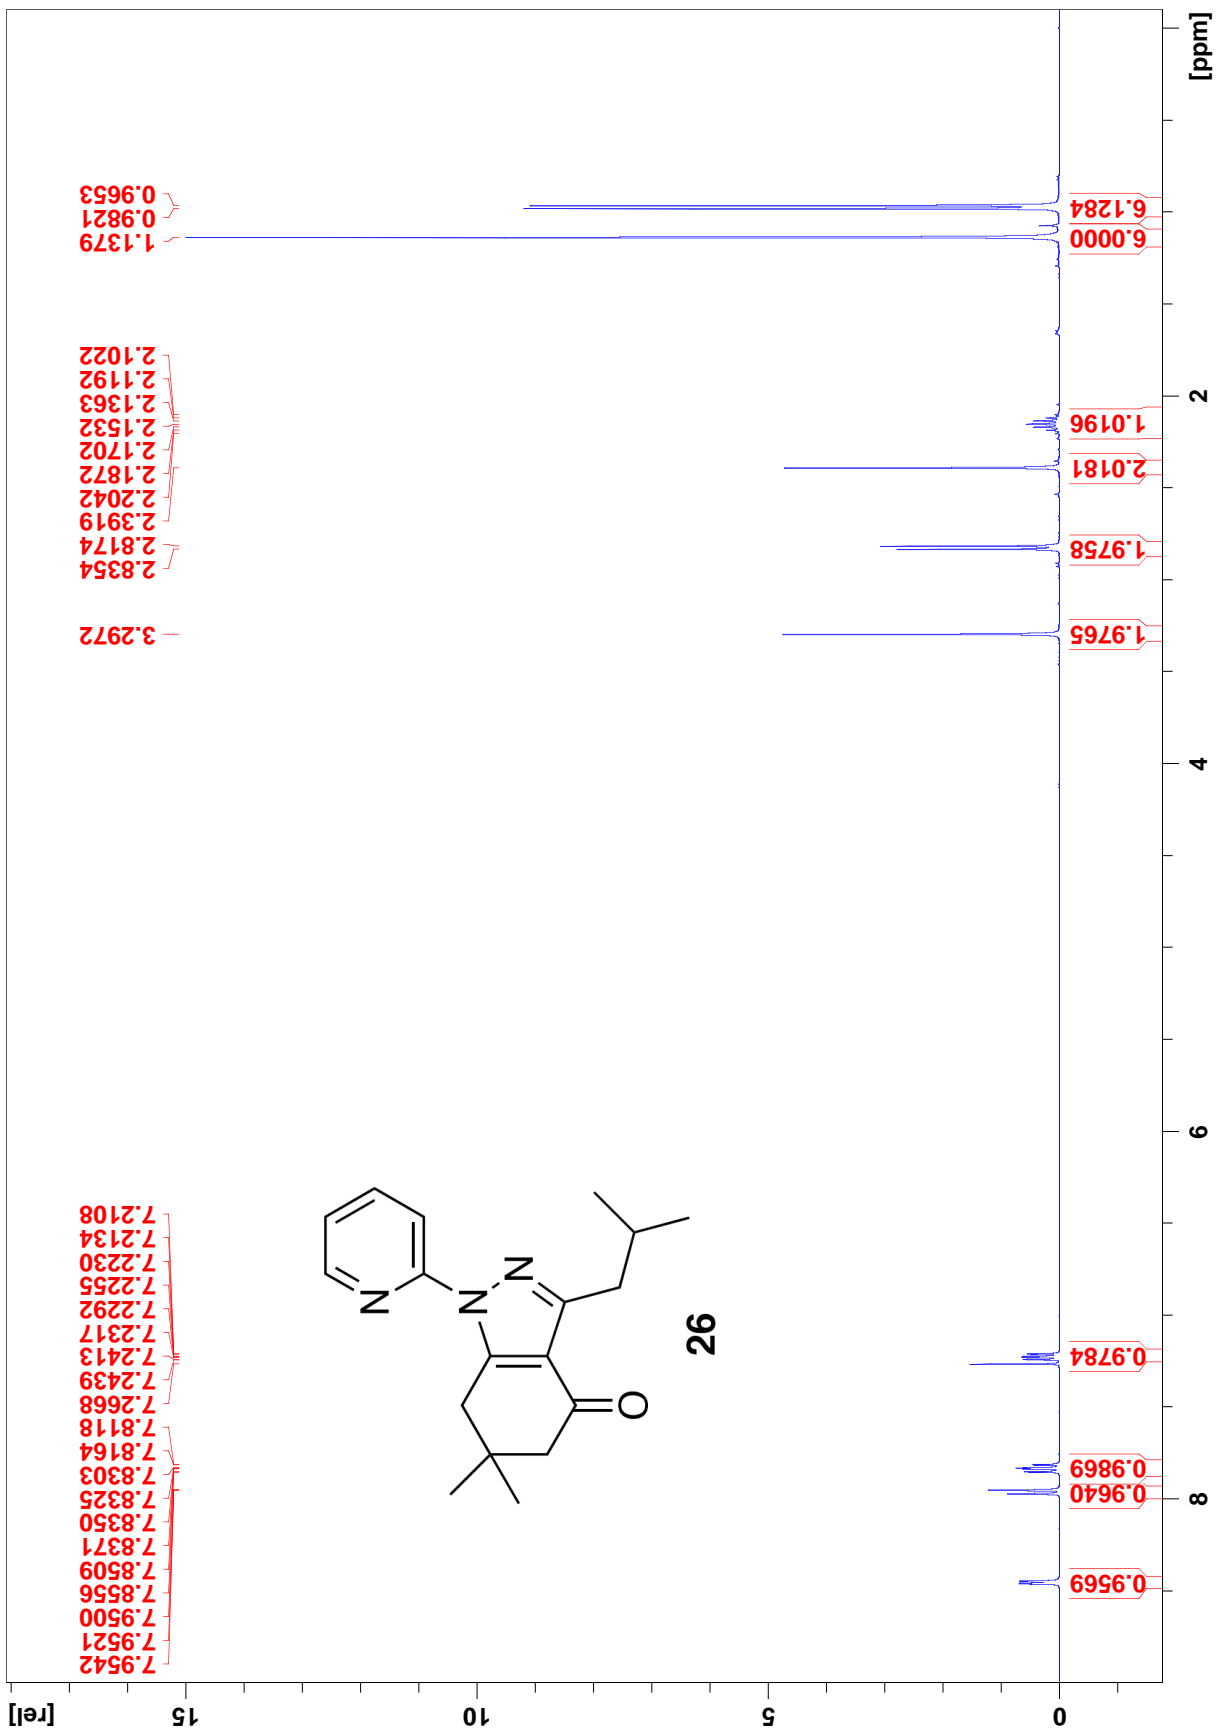

# 13C-NMR

JL08-11.2608 3 1 C:\Bruker\TOPSPIN leex3451

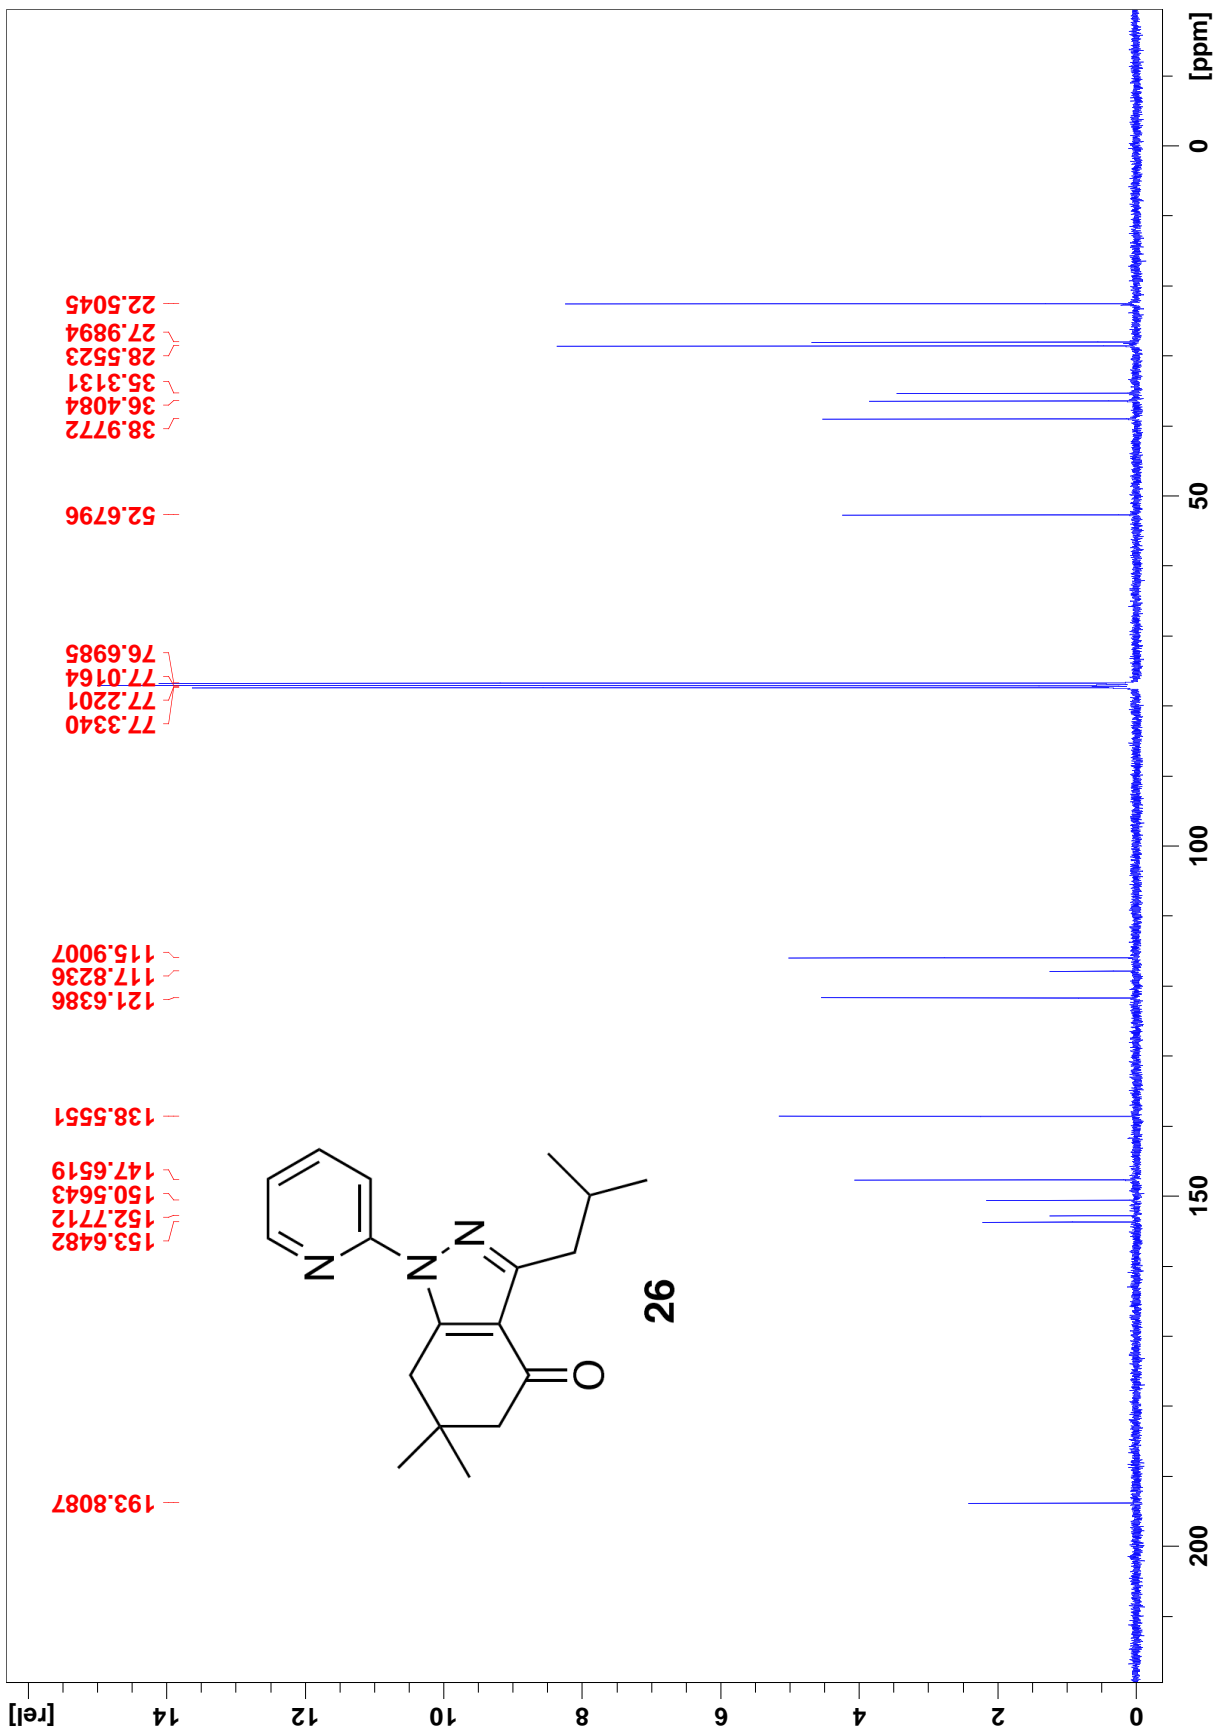

# 1H-NMR

JL09-010709A 1 1 C:\Bruker\TOPSPIN leex3451

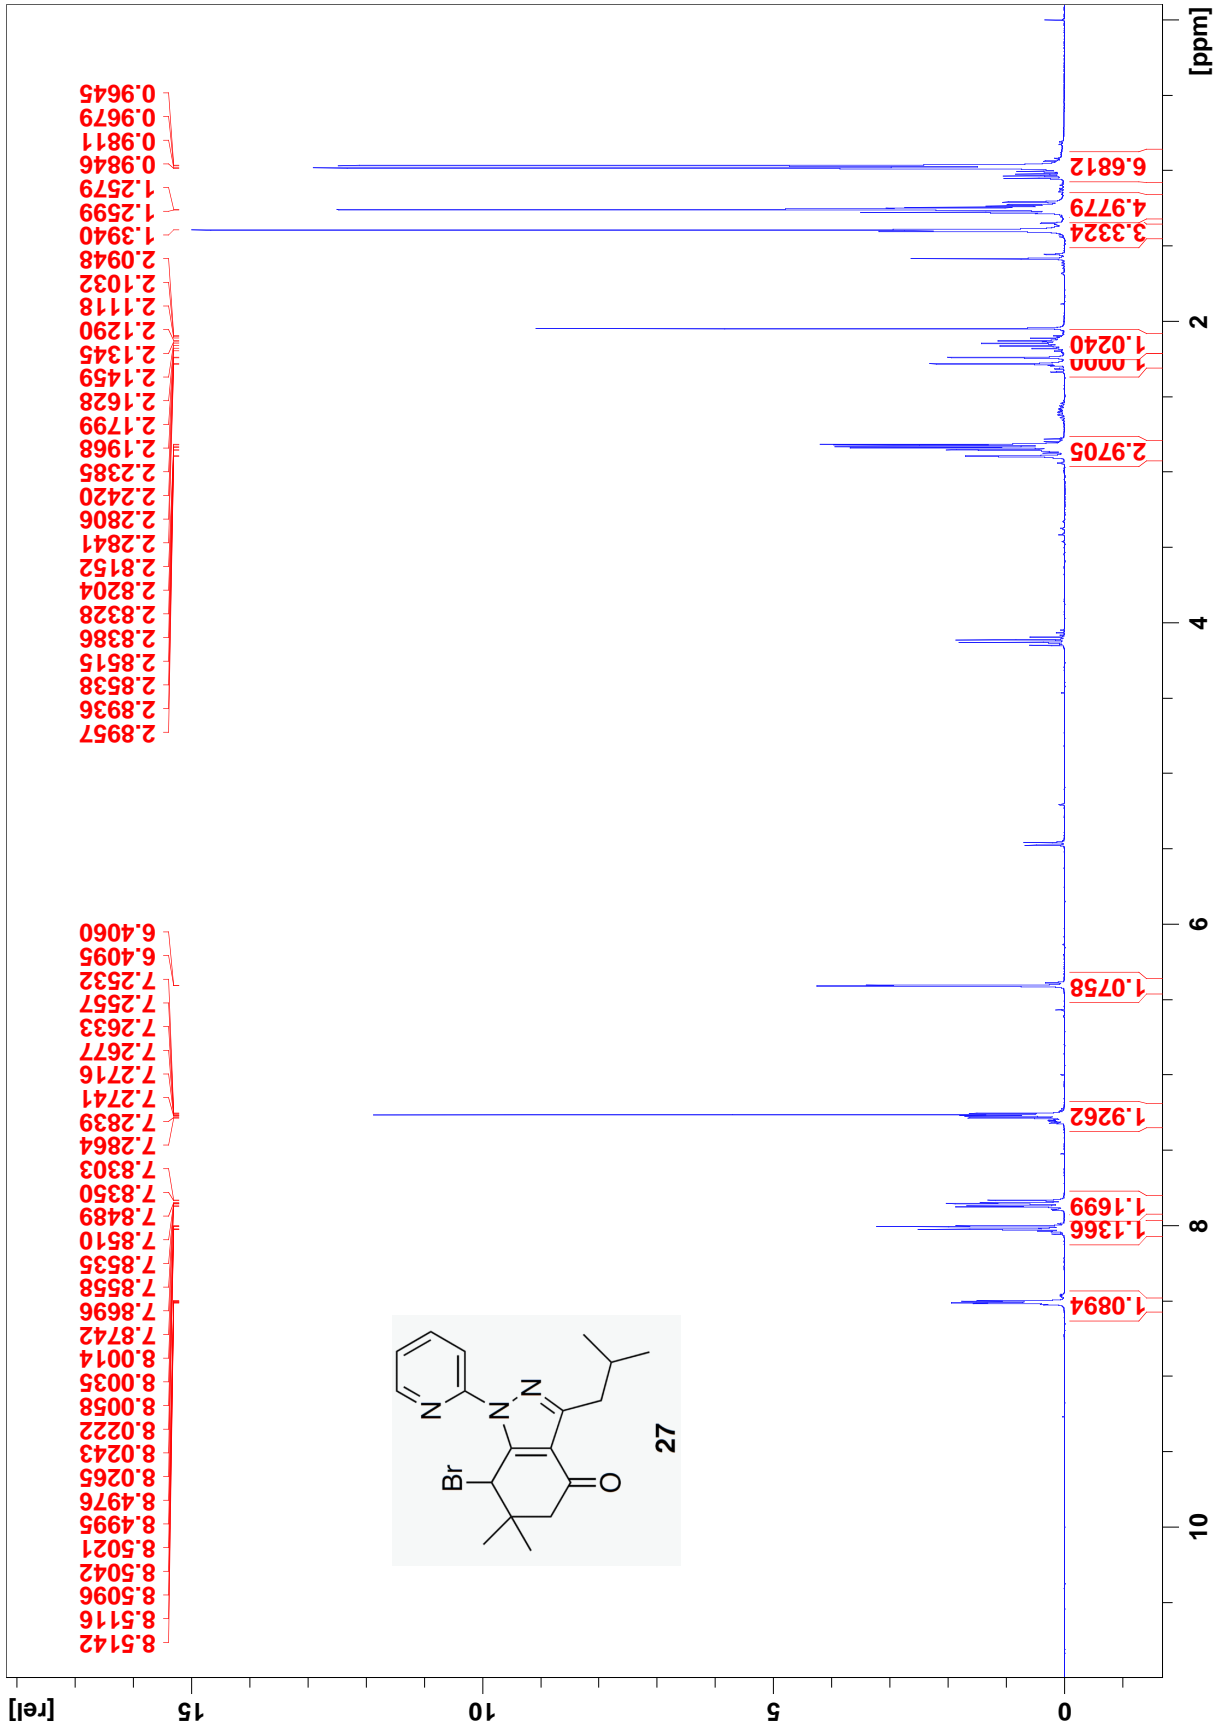

# 13C-NMR

JL09-01.0709A 4 1 C:\Bruker\TOPSPIN leex3451

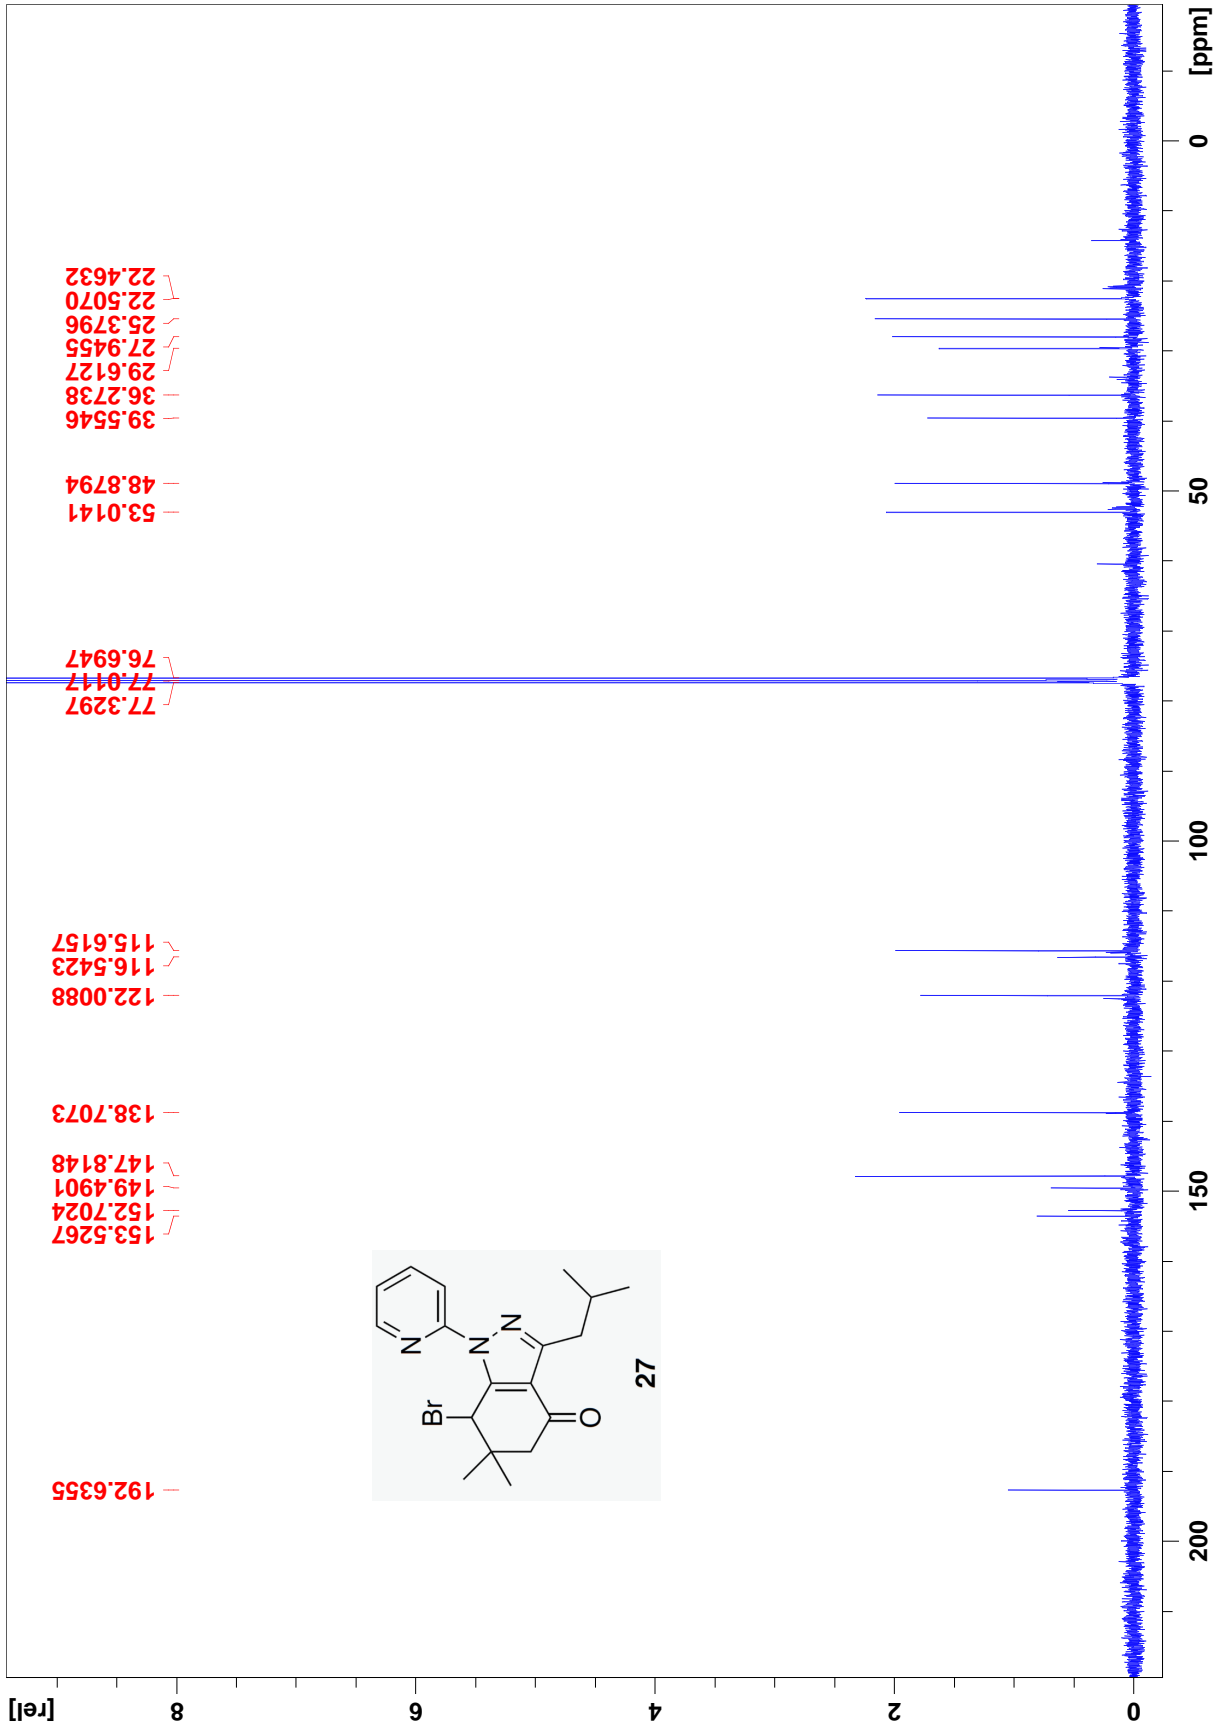

# 1H-NMR

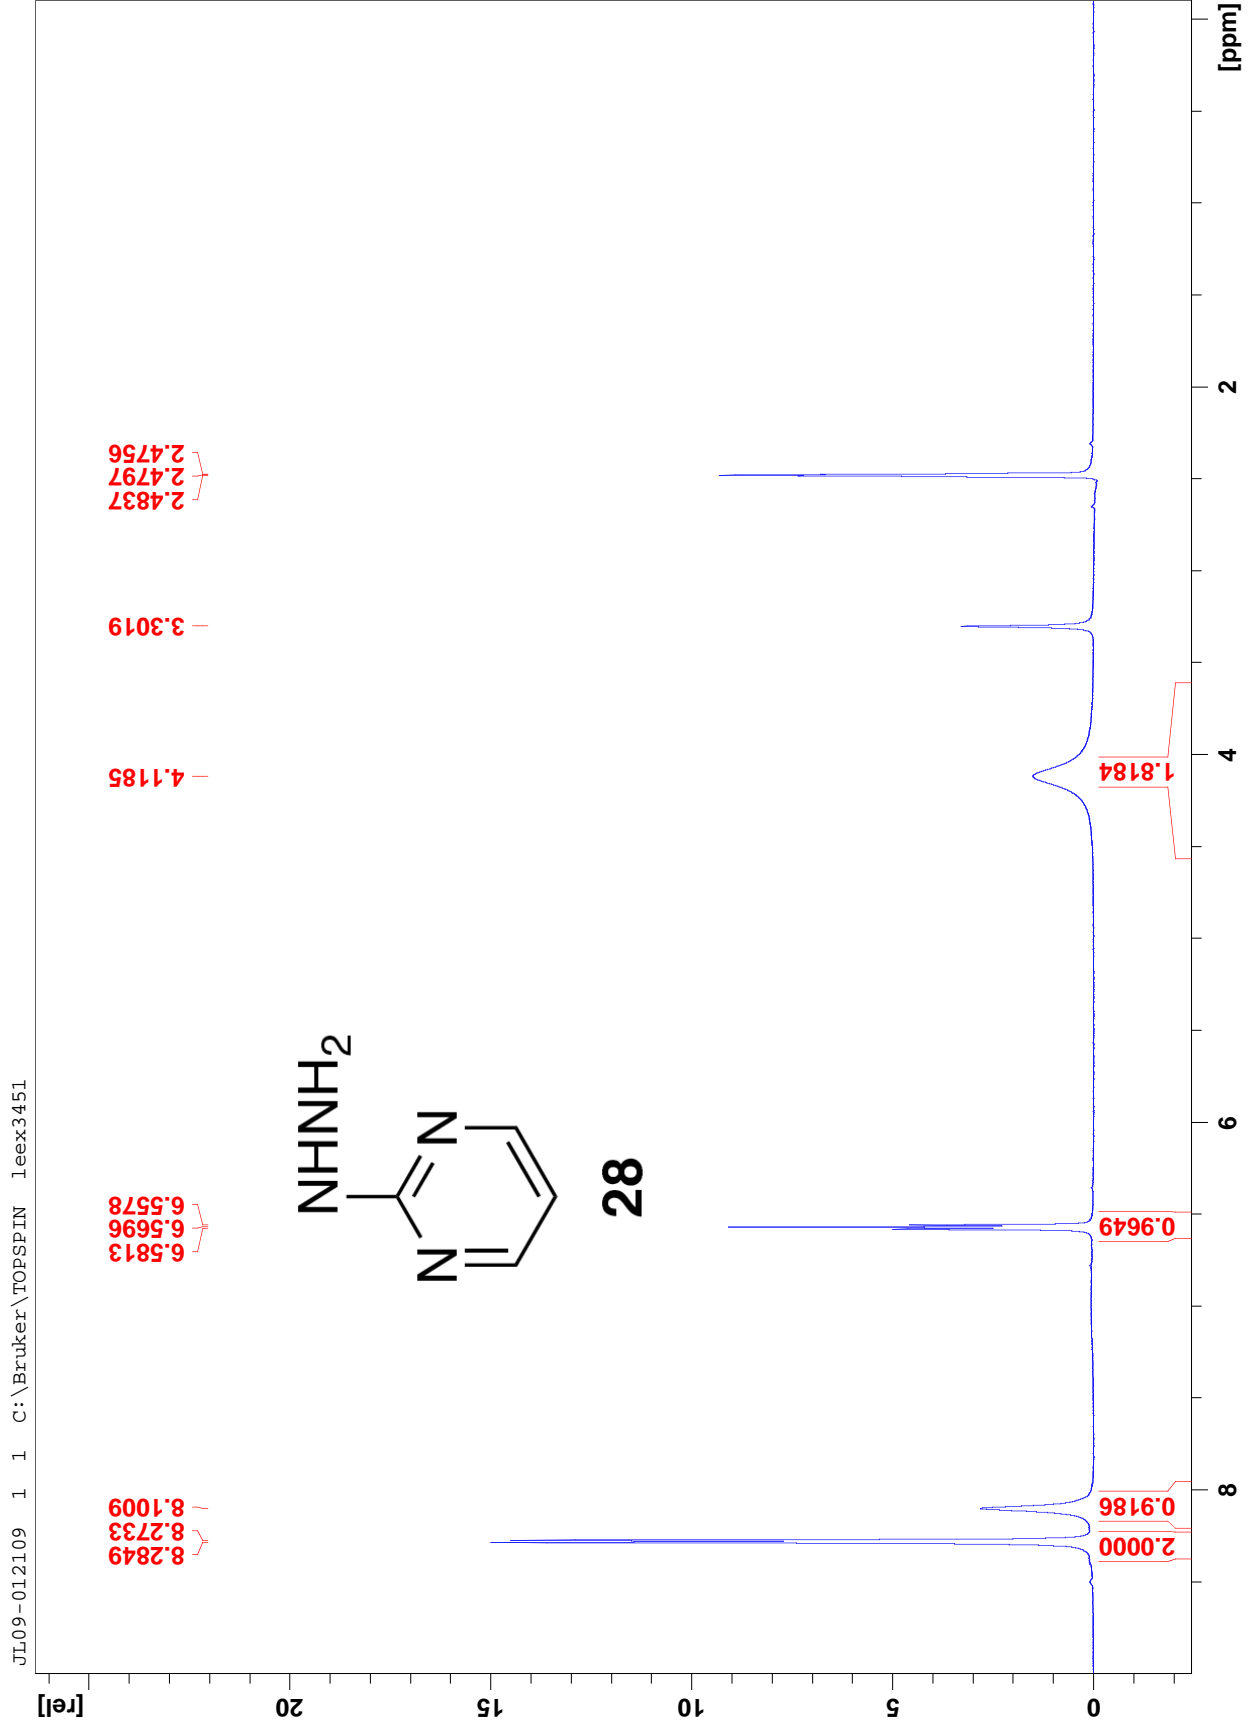



# 13C-NMR

JL09-01.2109 4 1 C:\Bruker\TOPSPIN leex3451

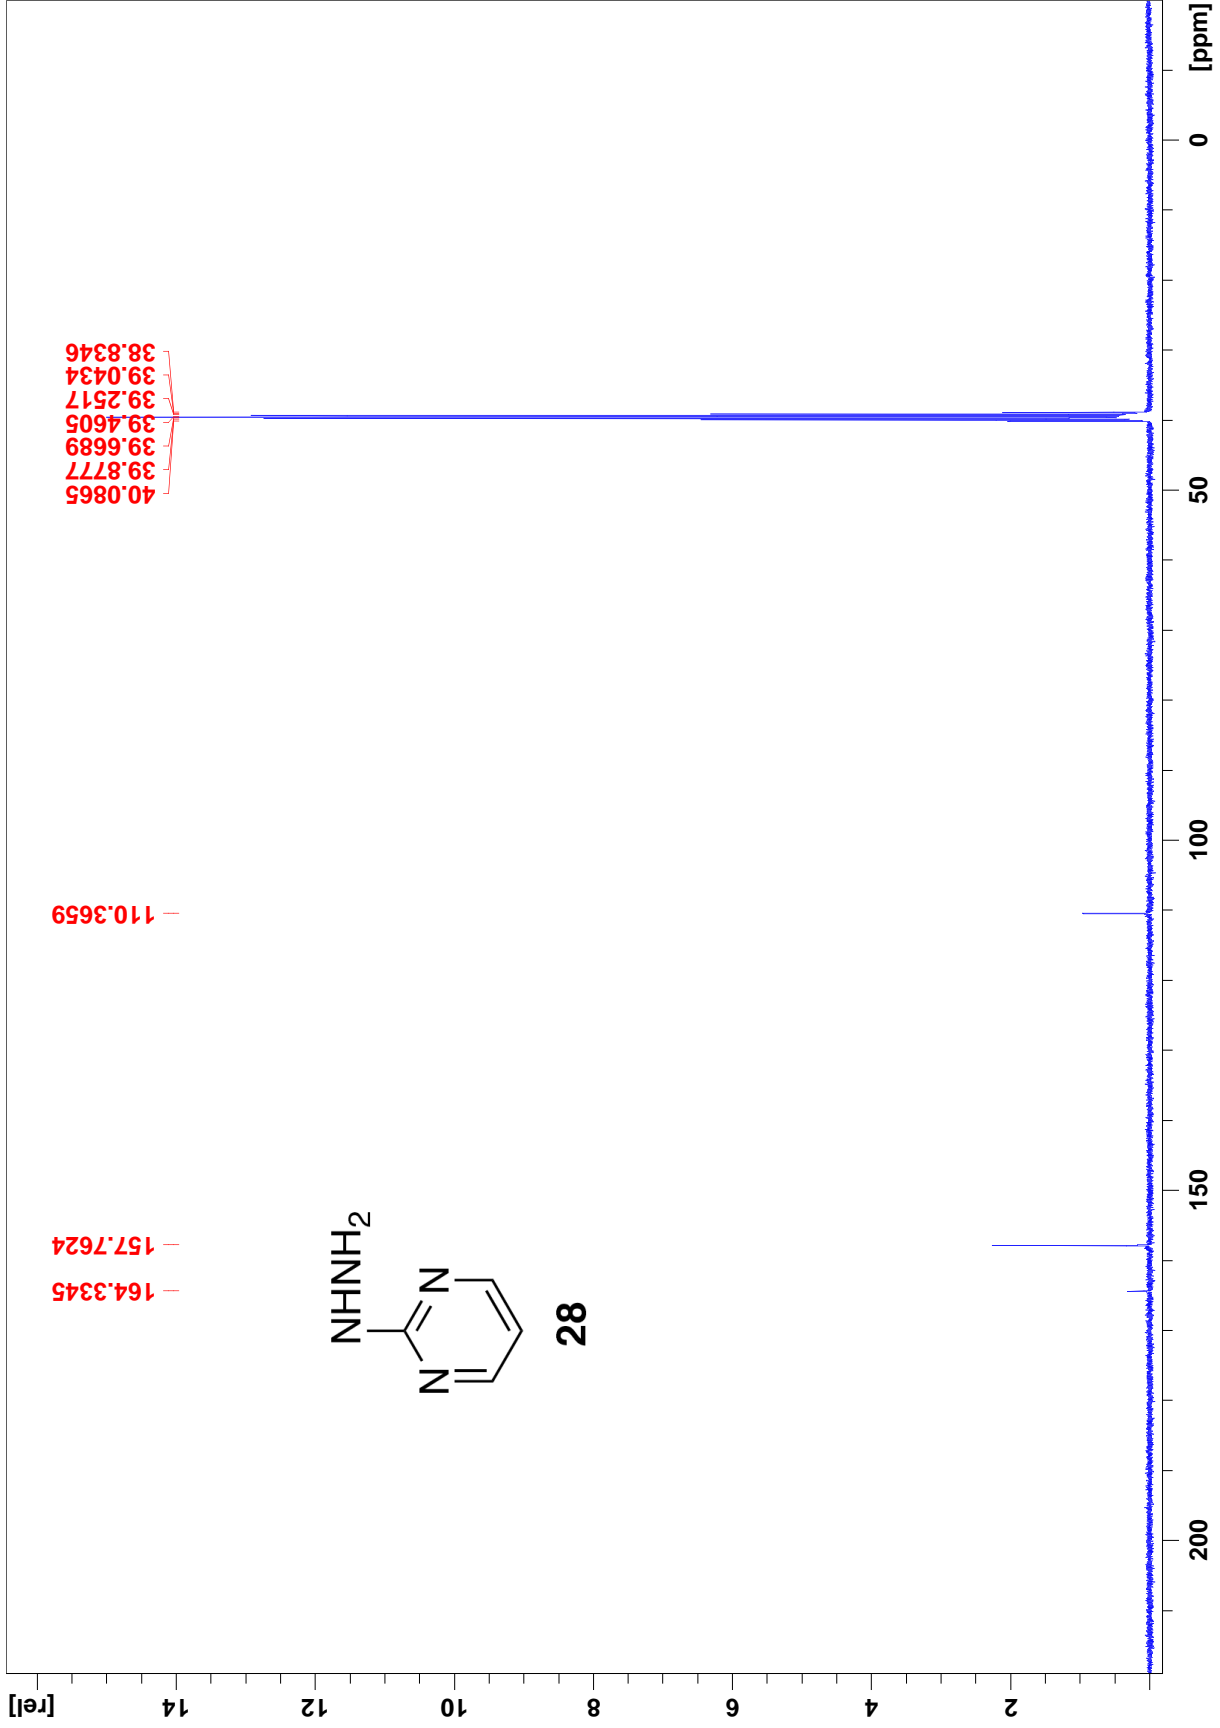

# 1H-NMR

JL09-01.2909 1 1 C:\Bruker\TOPSPIN leex3451

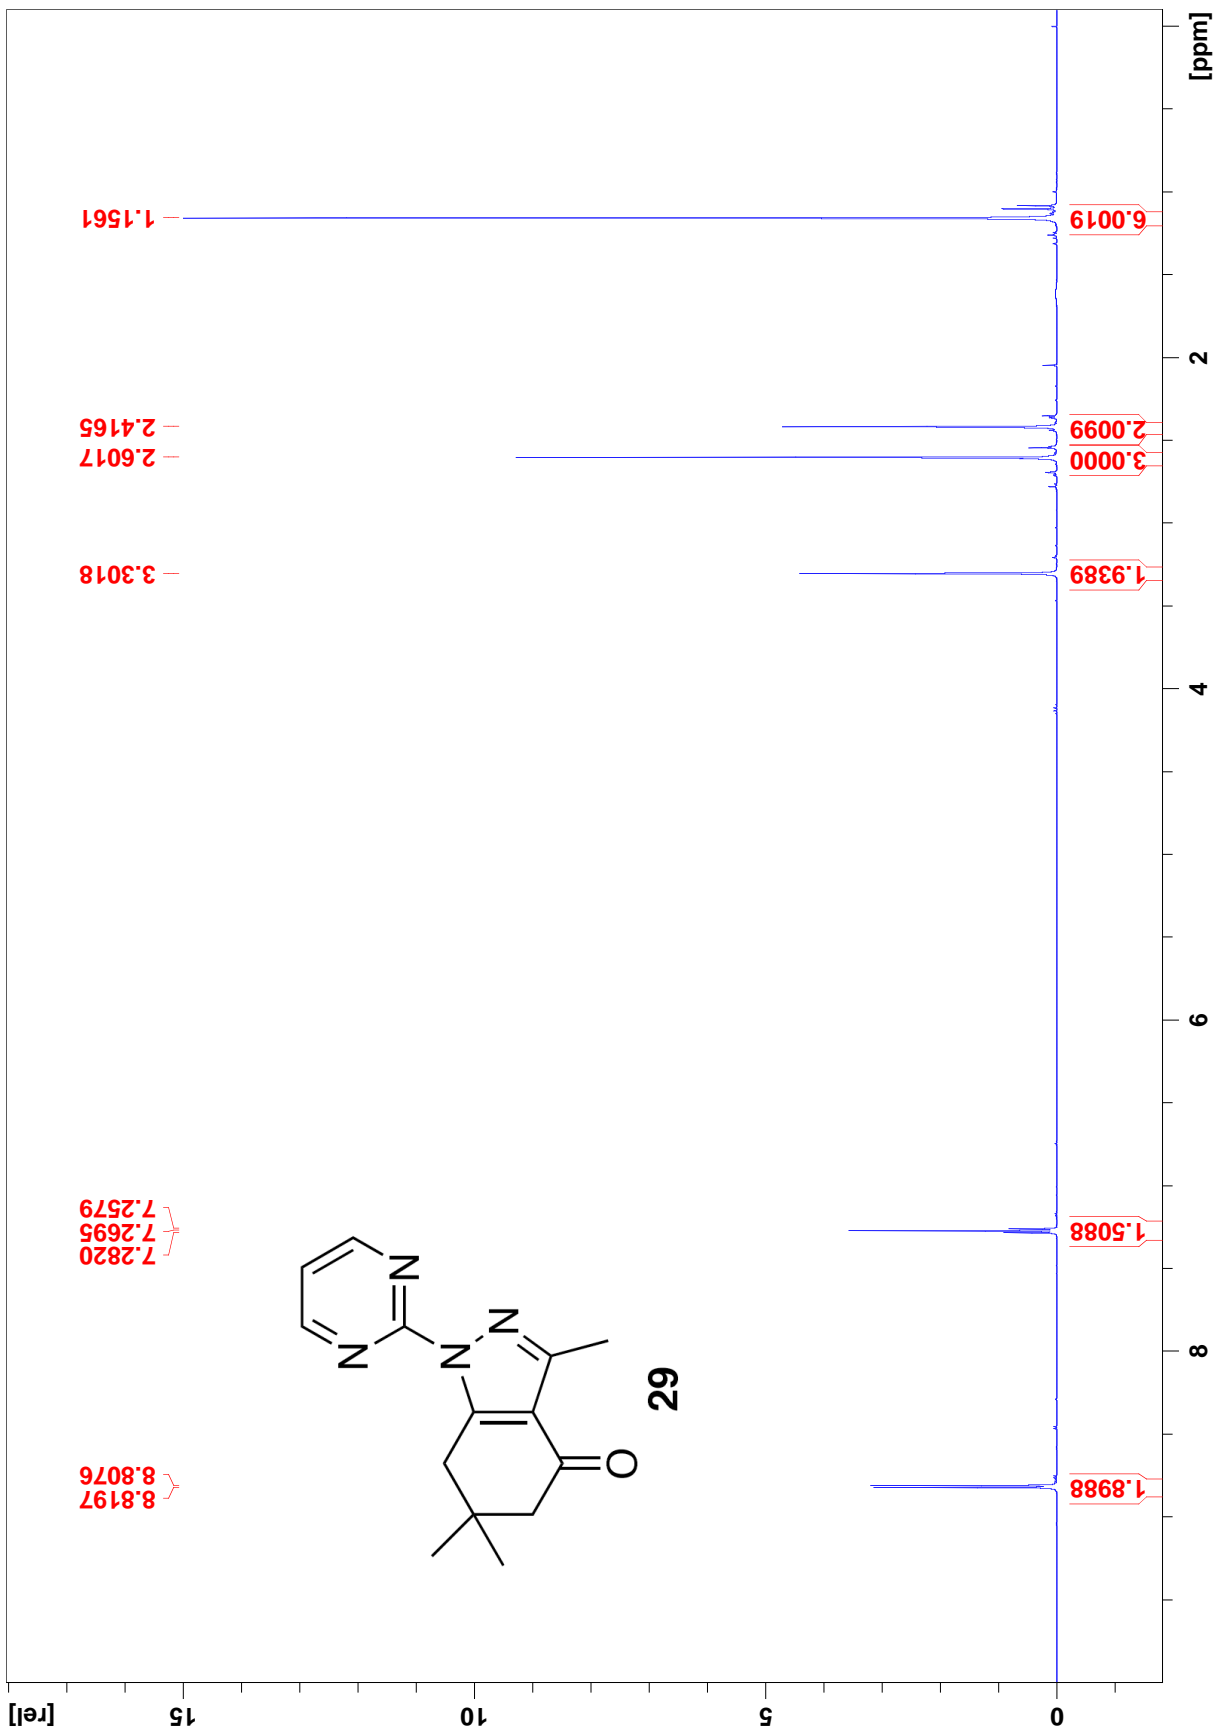

# 13C-NMR

JL09-01.2909 3 1 C:\Bruker\TOPSPIN leex3451

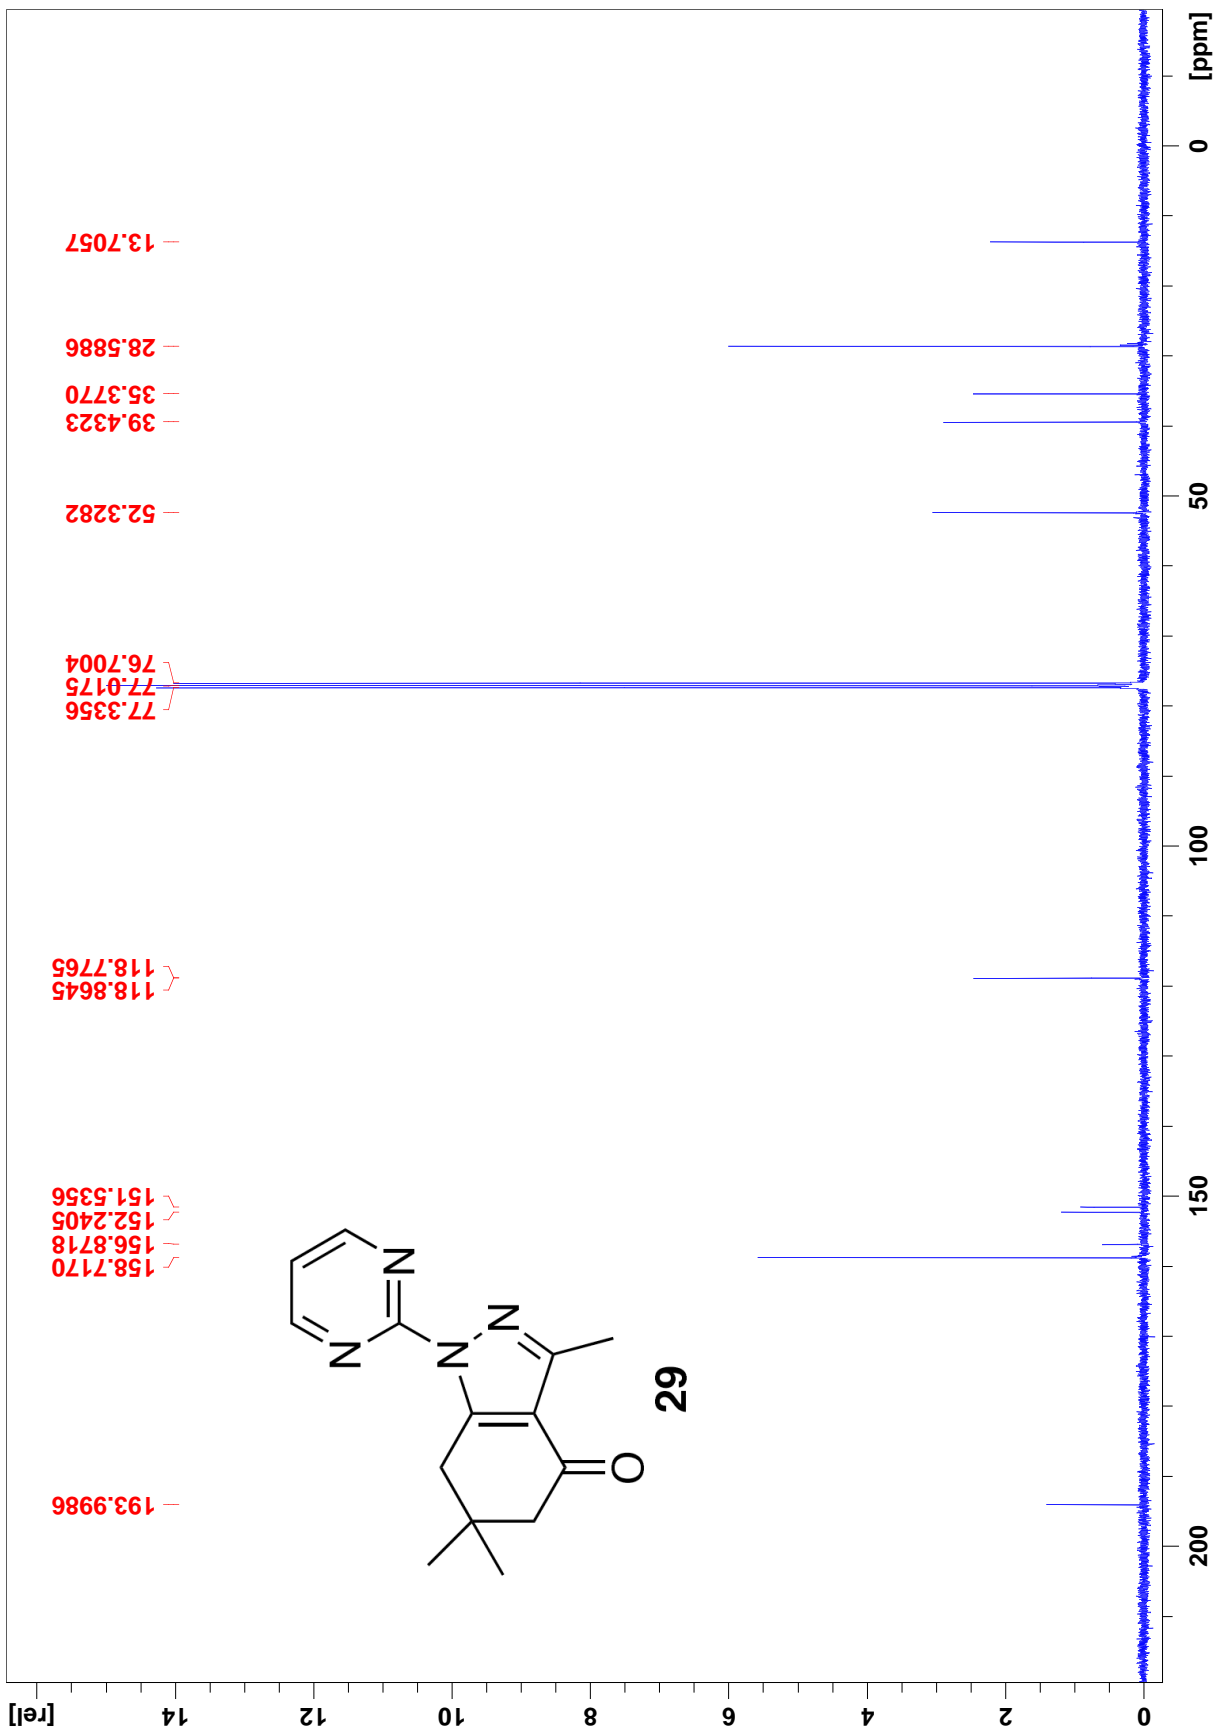

# 1H-NMR

JL09-020409 1 1 C:\Bruker\TOPSPIN leex3451

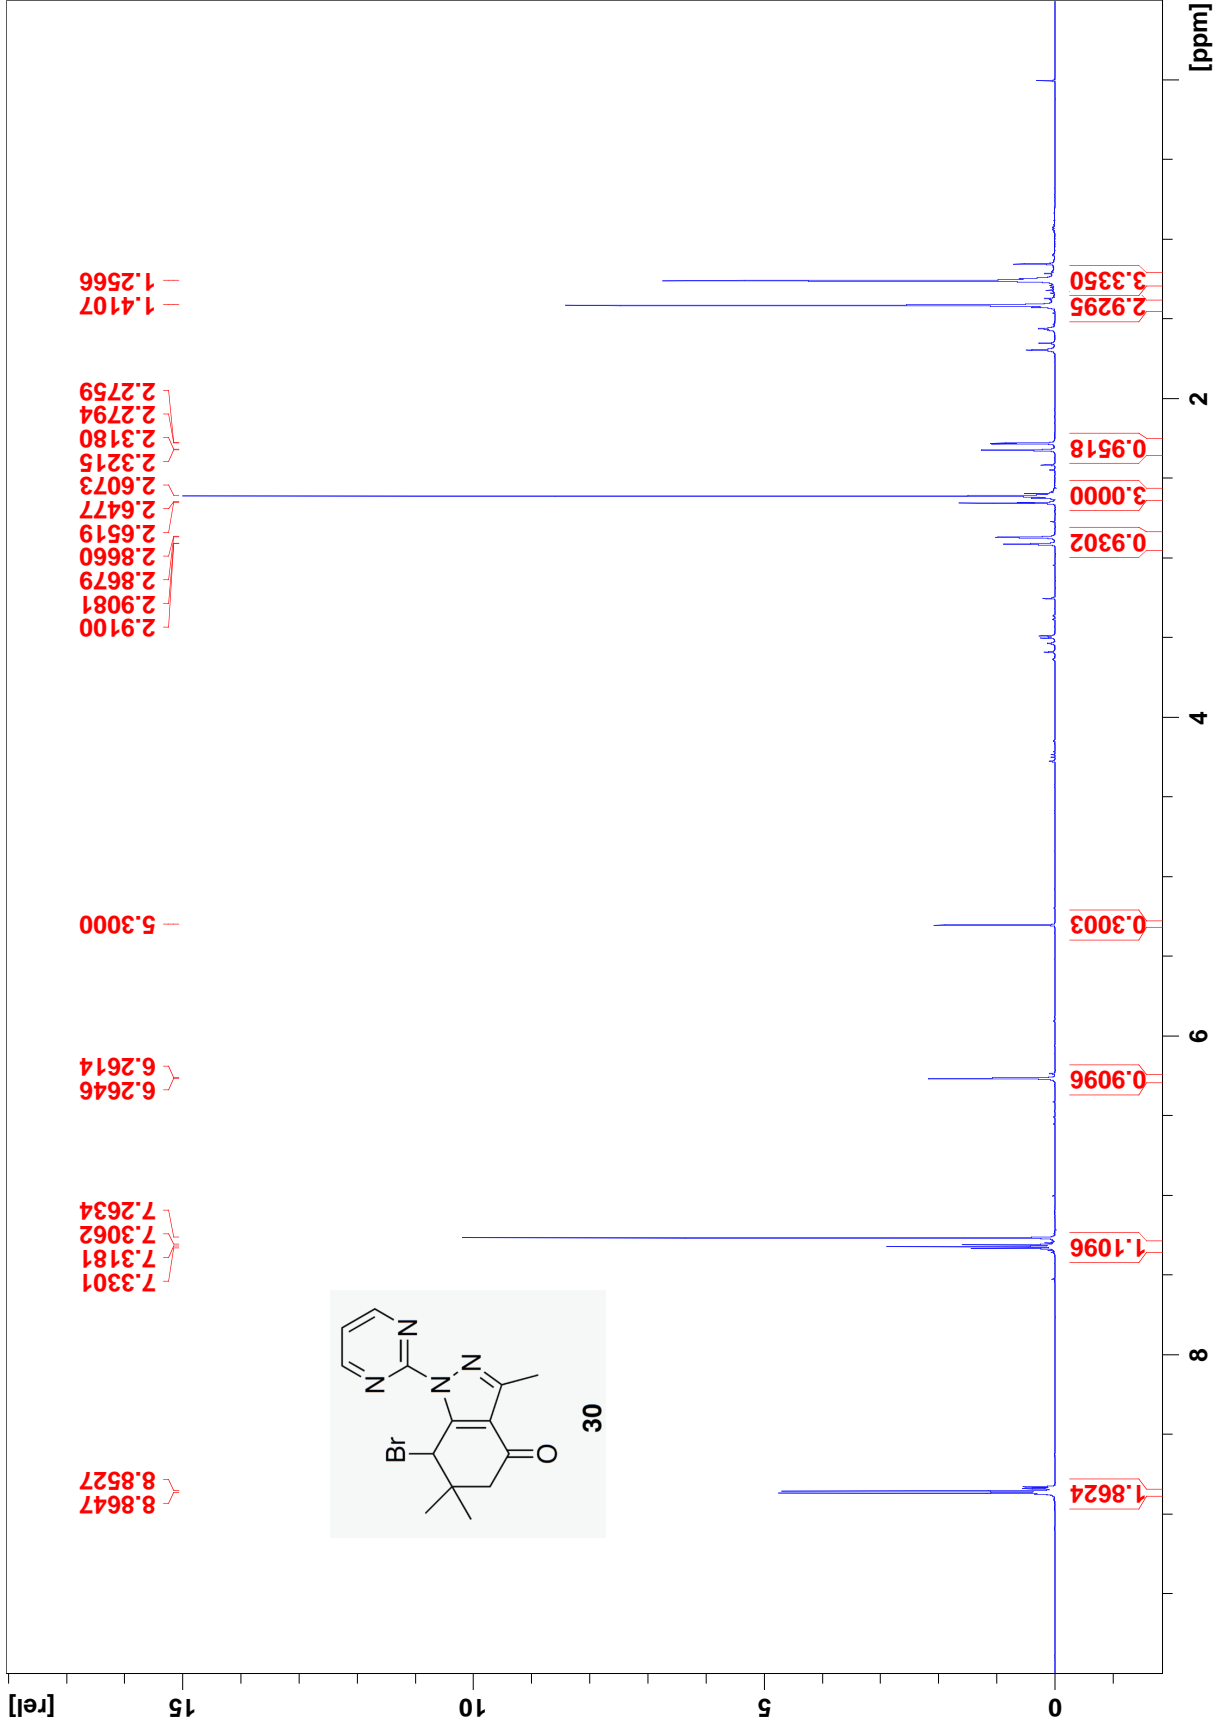

# 13C-NMR

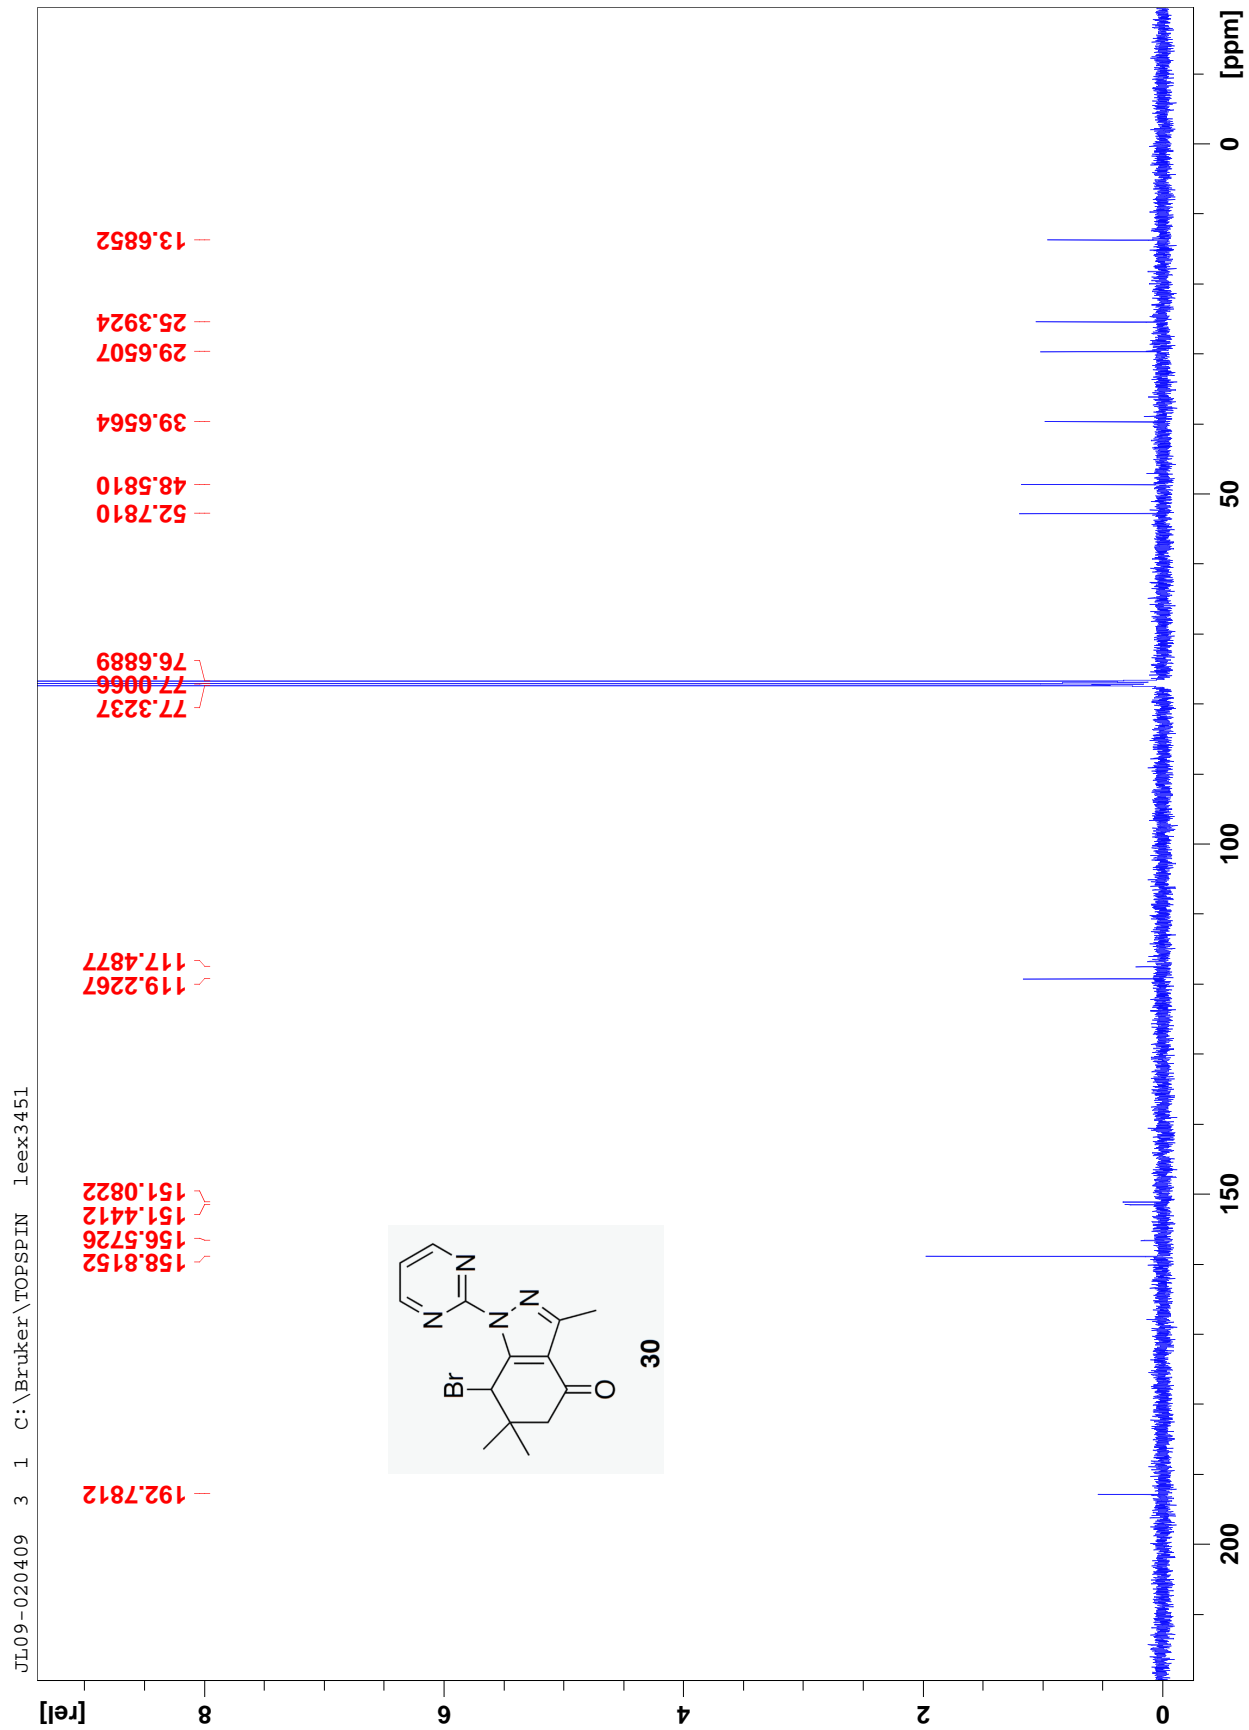

# 1H-NMR

JL09-01.2309 1 1 C:\Bruker\TOPSPIN leex3451

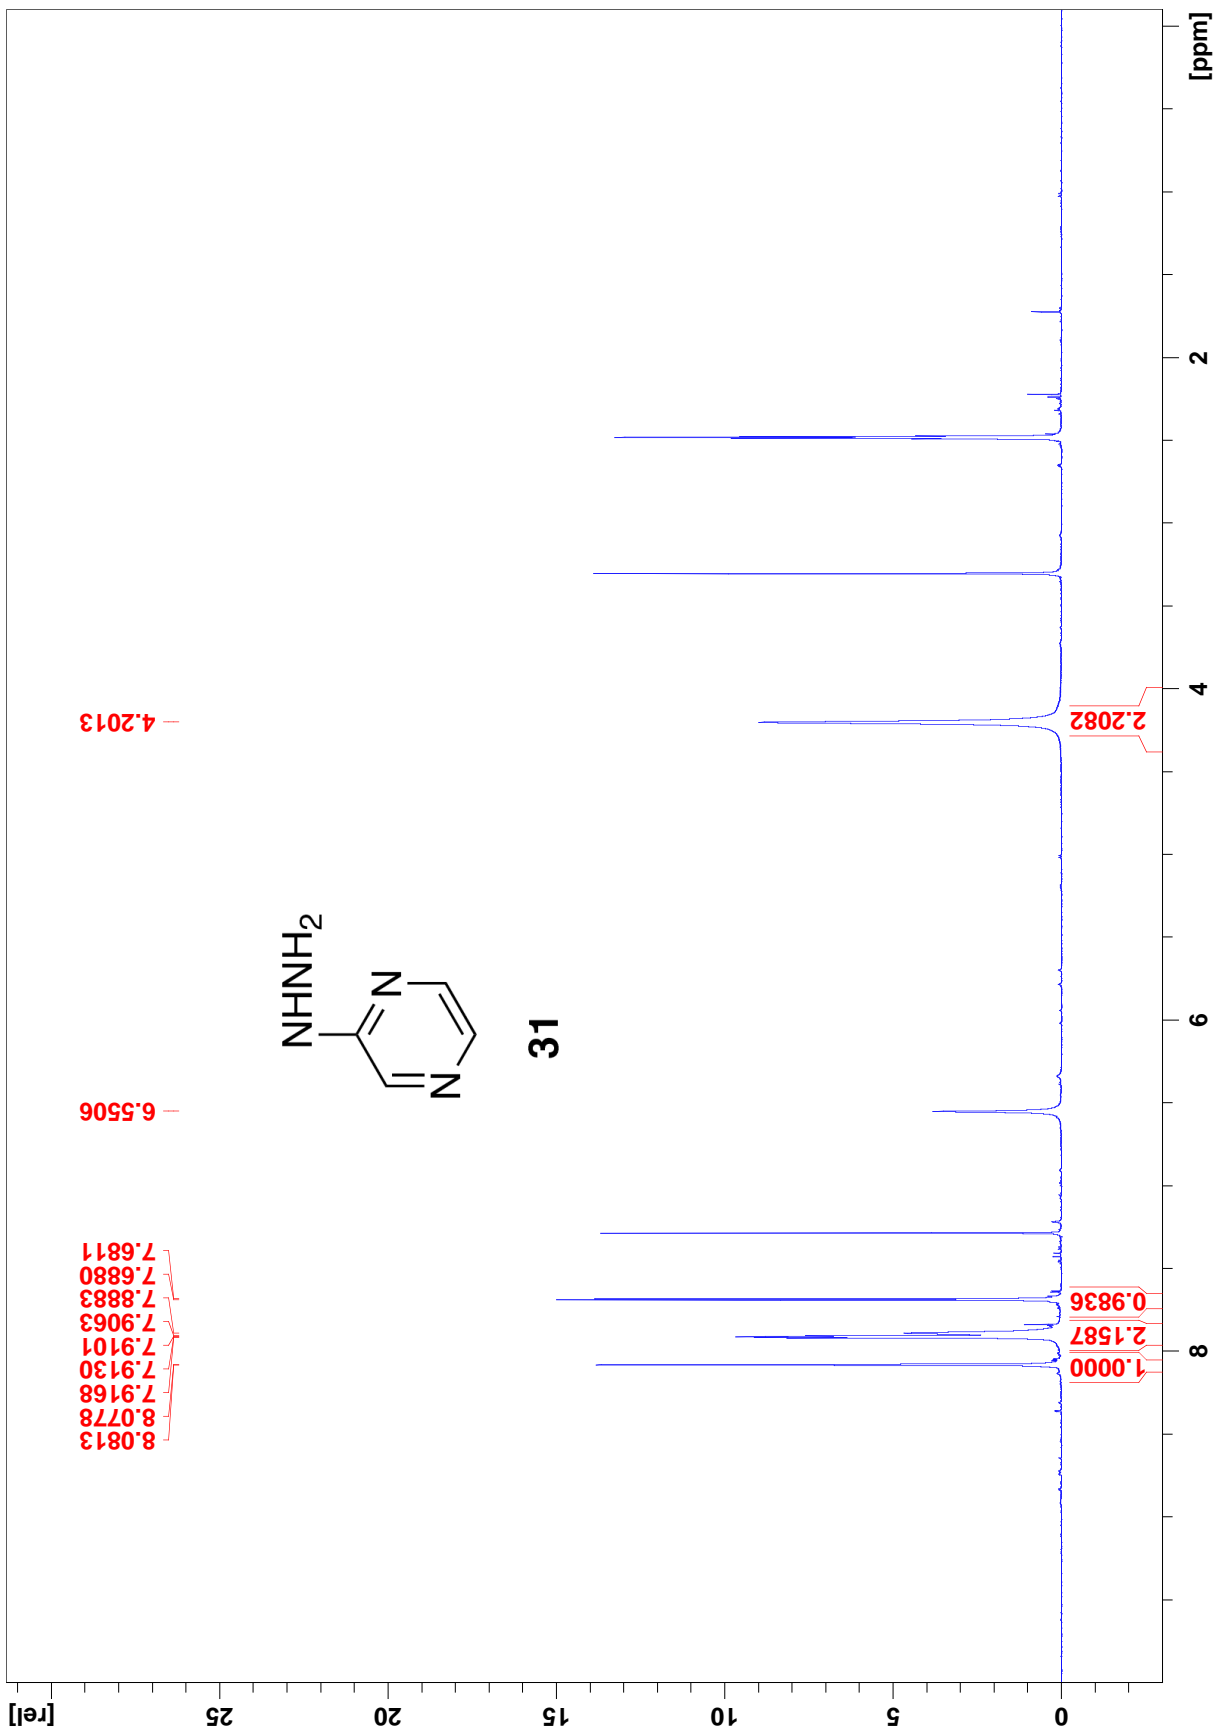

# 13C-NMR

JL09-01.2309 3 1 C:\Bruker\TOPSPIN leex3451

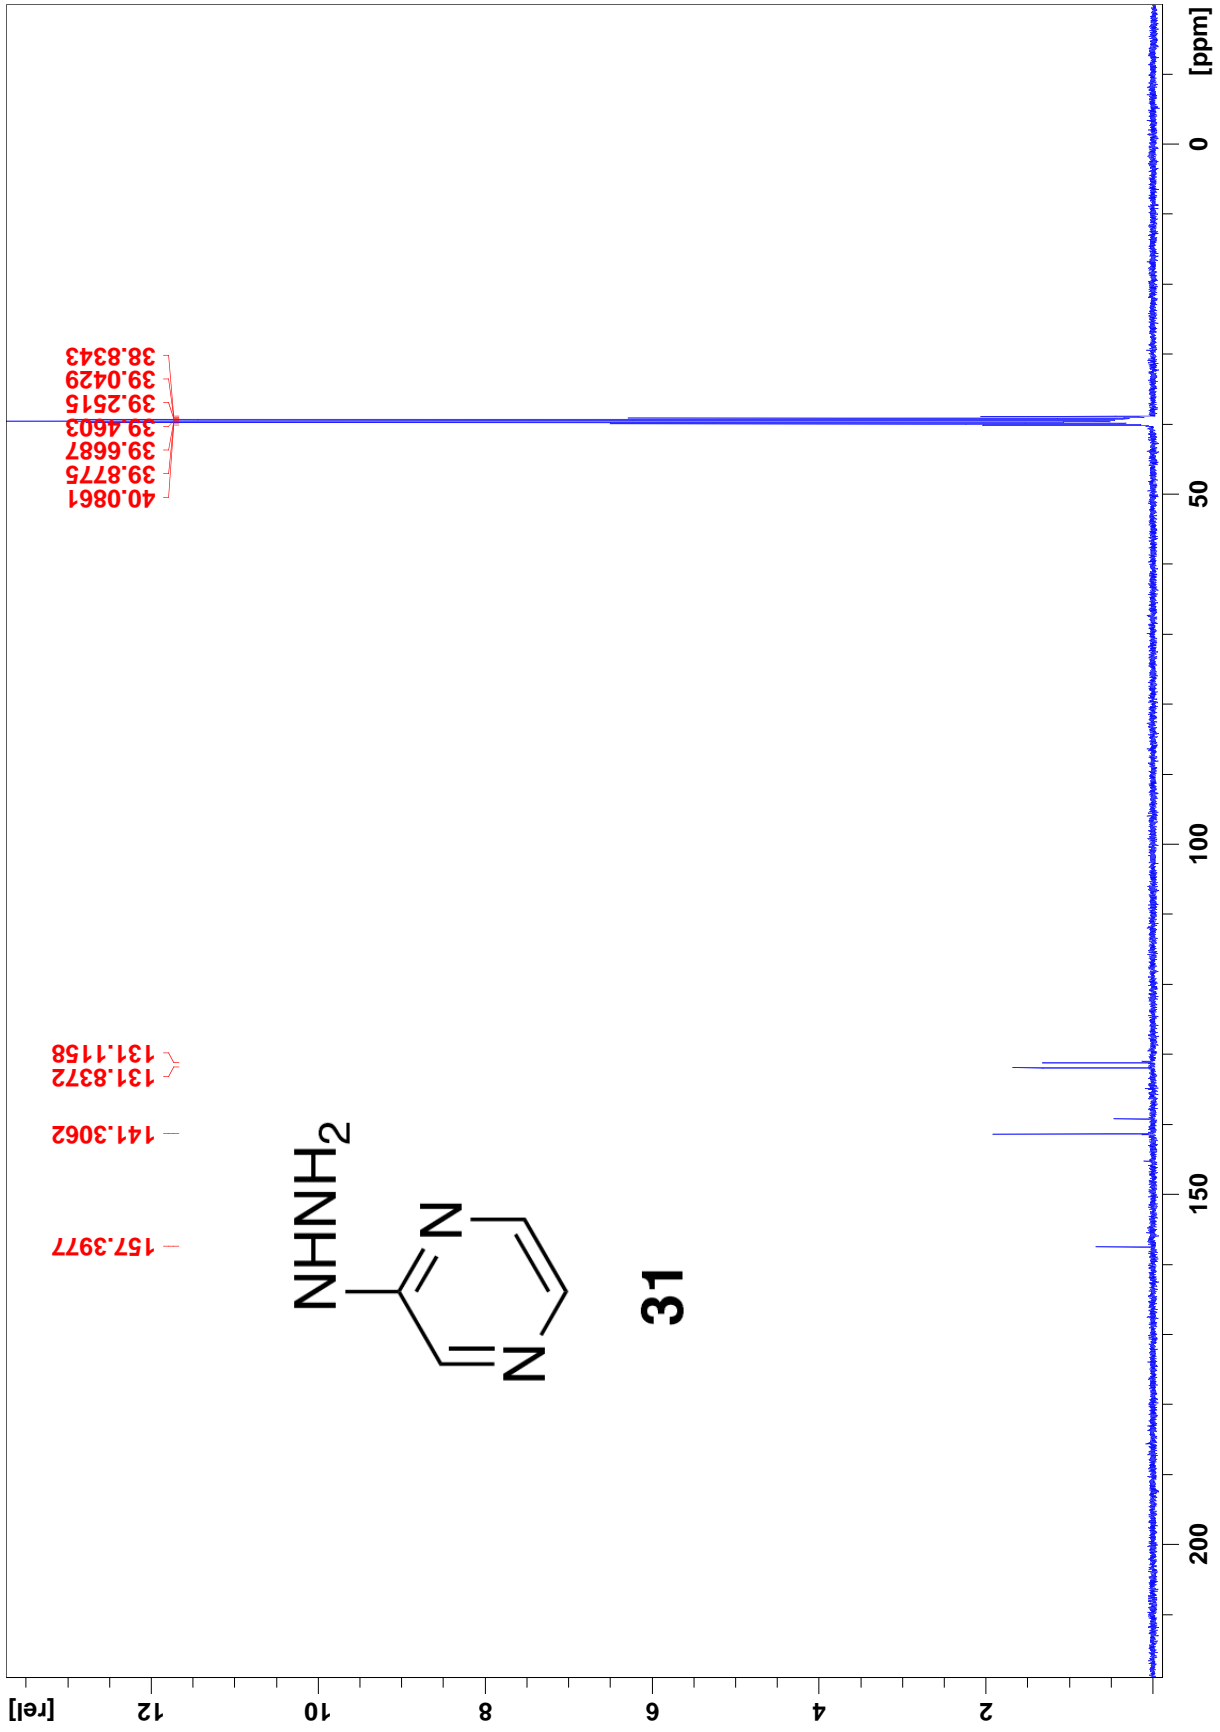

# 1H-NMR

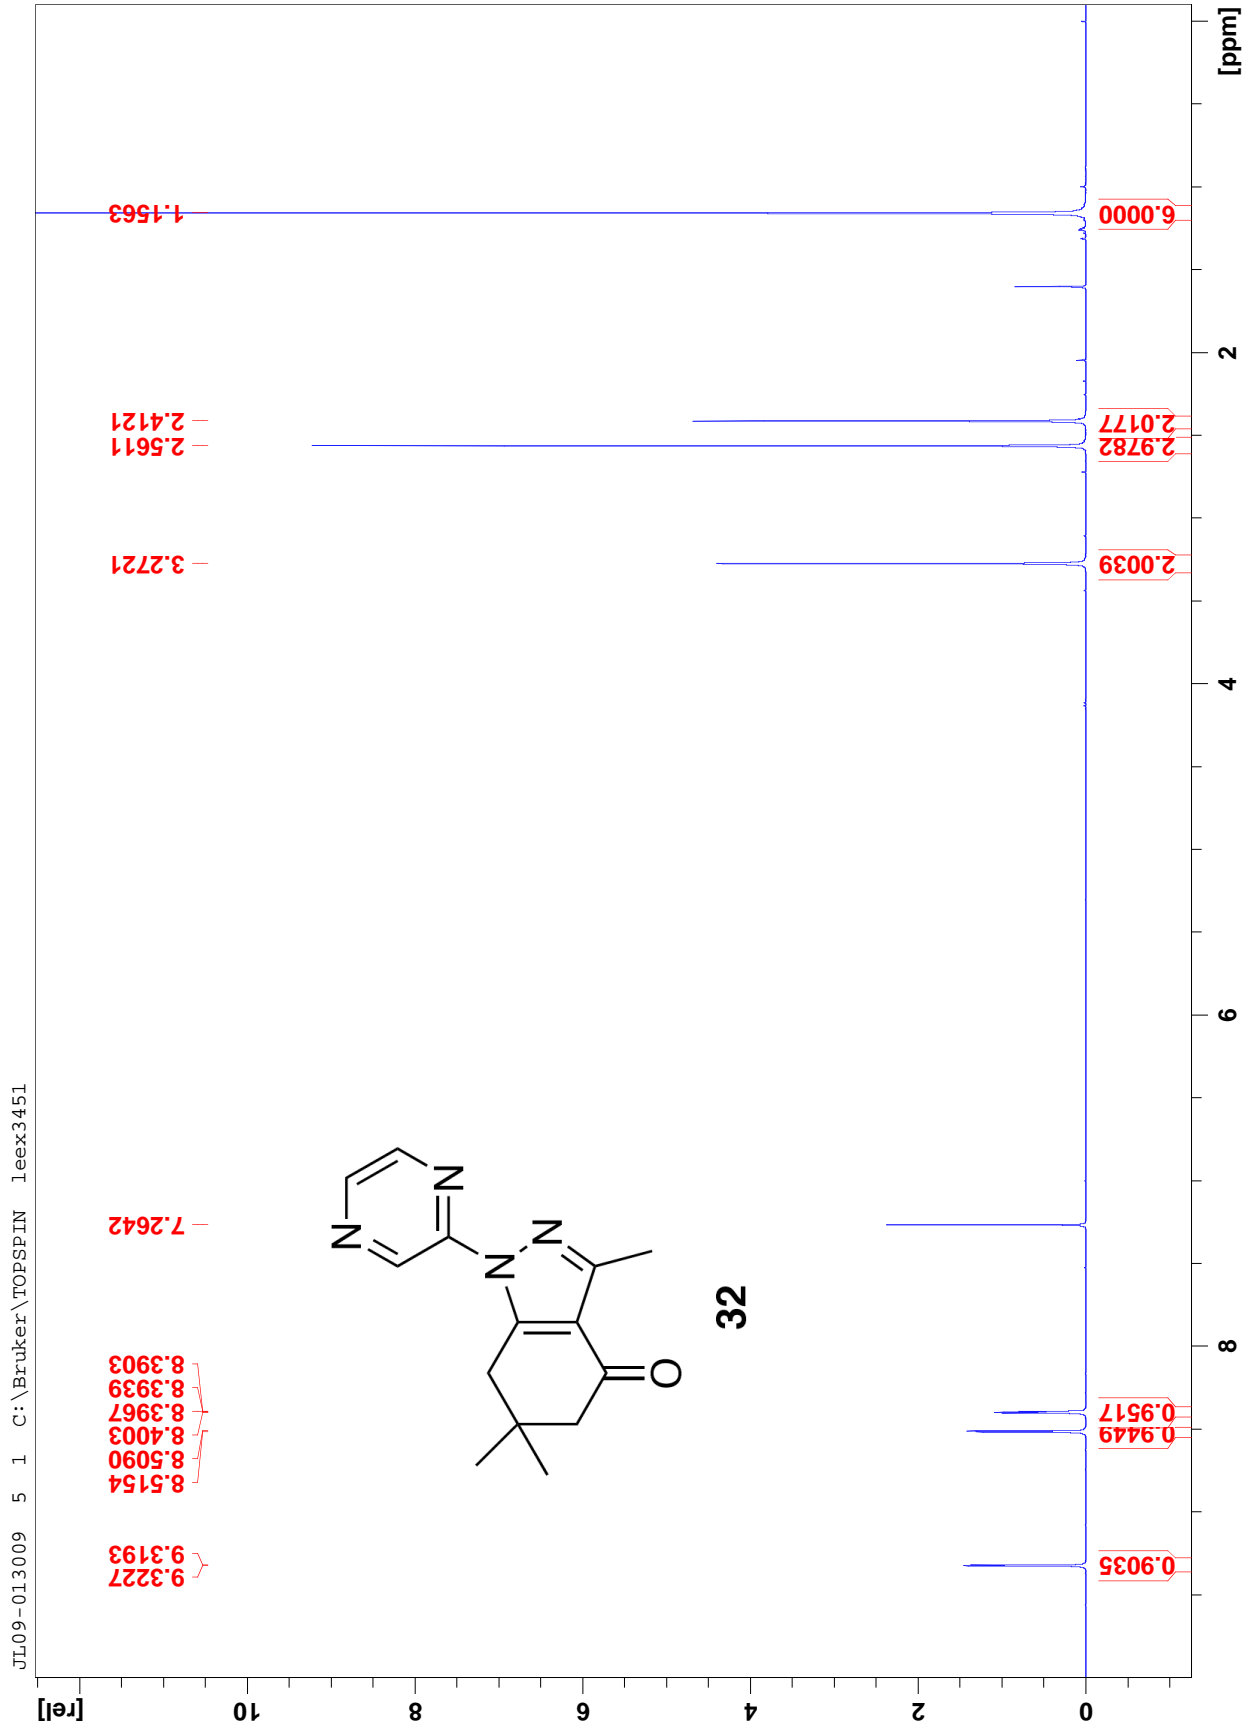



# 13C-NMR

JL09-013009 8 1 C:\Bruker\TOPSPIN leex3451

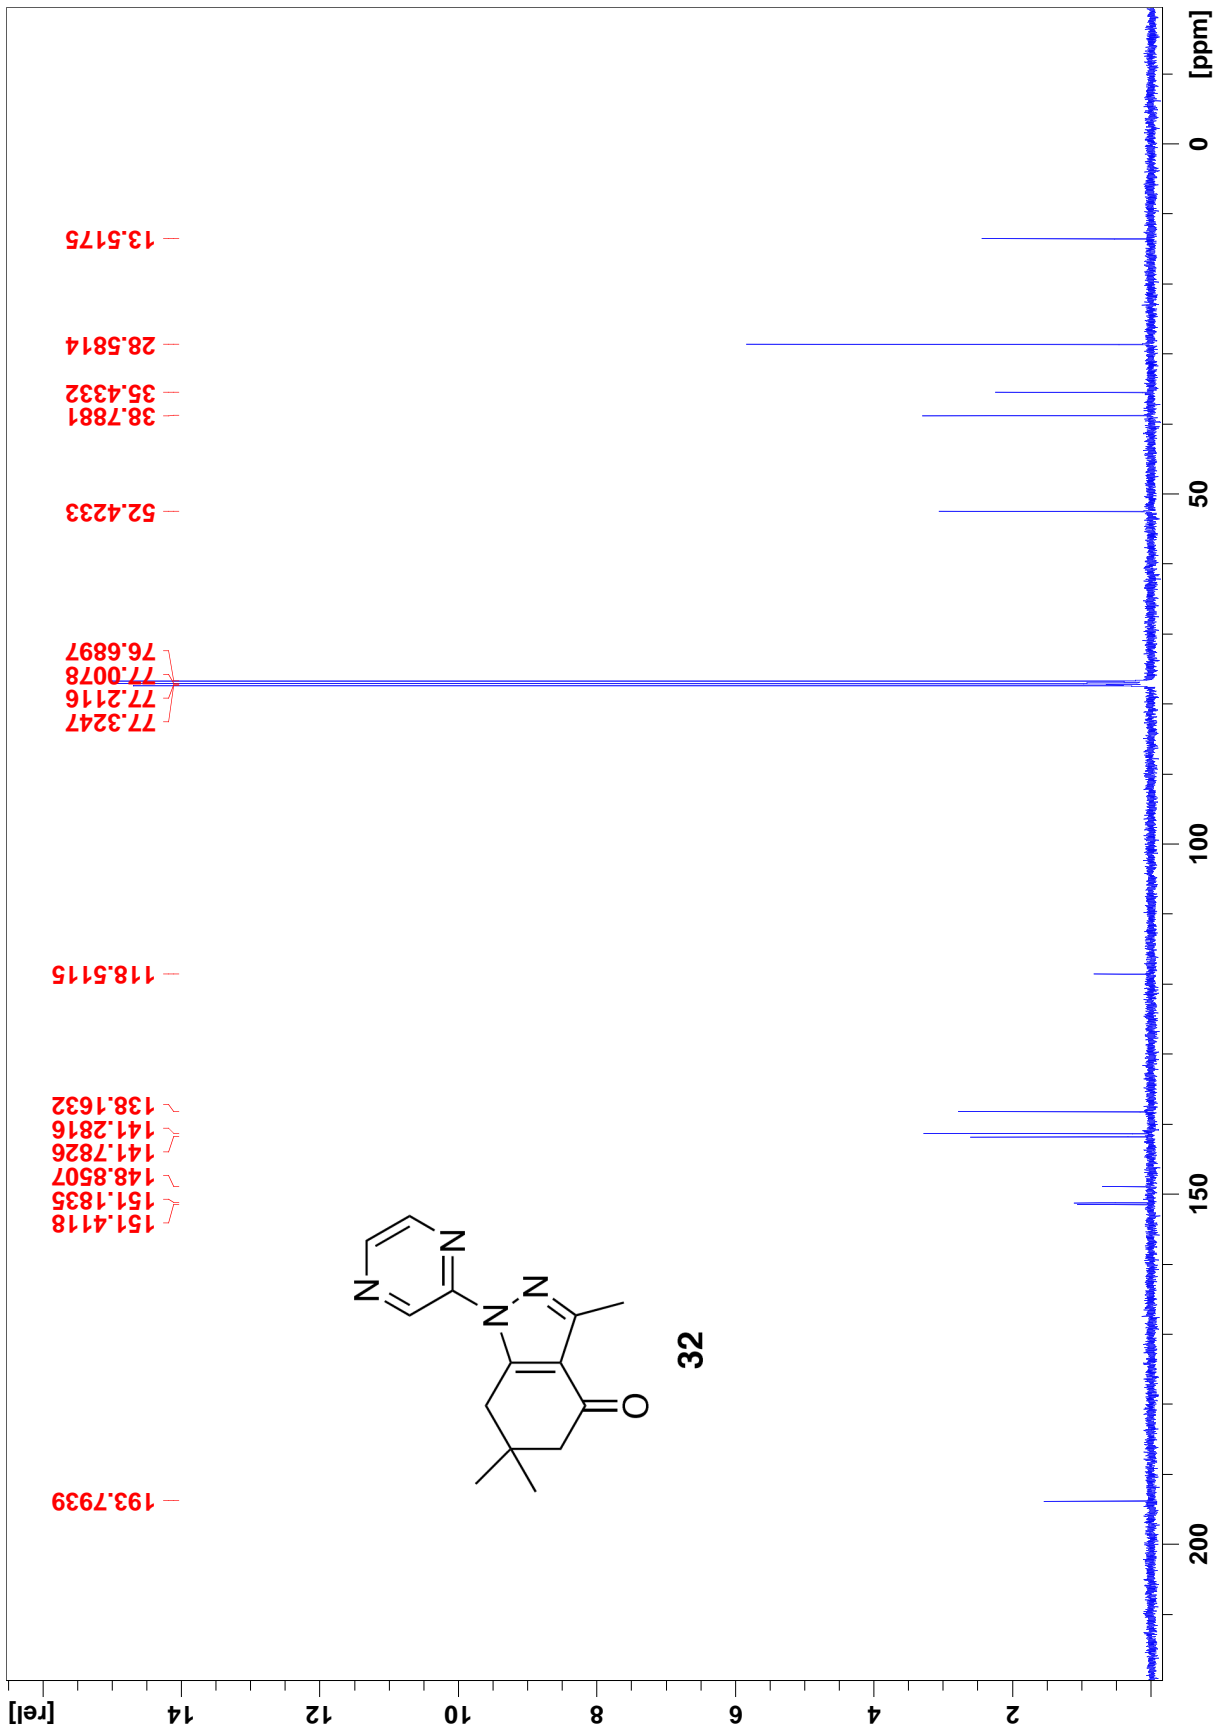

# 1H-NMR

JL09-020309A 4 1 C:\Bruker\TOPSPIN leex3451

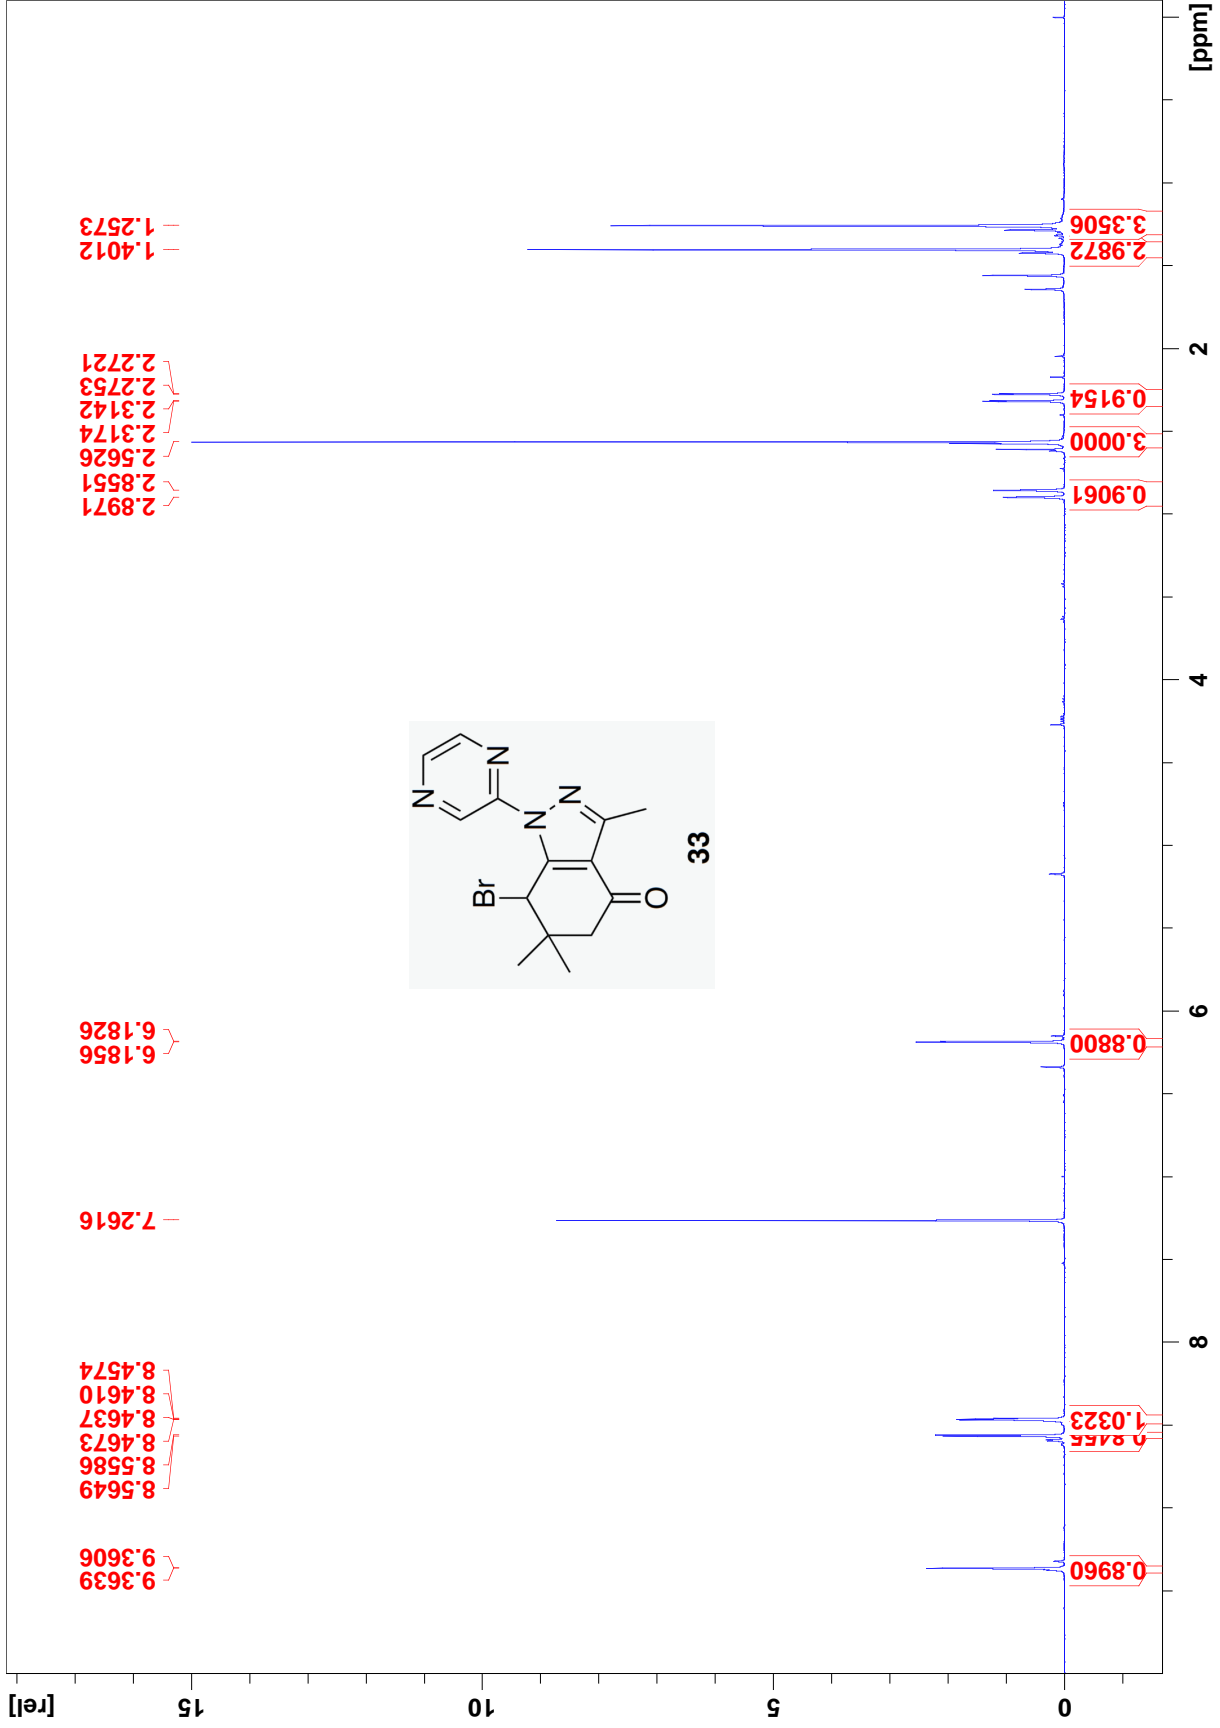

# 13C-NMR

JL09-020309A 3 1 C:\Bruker\TOPSPIN leex3451

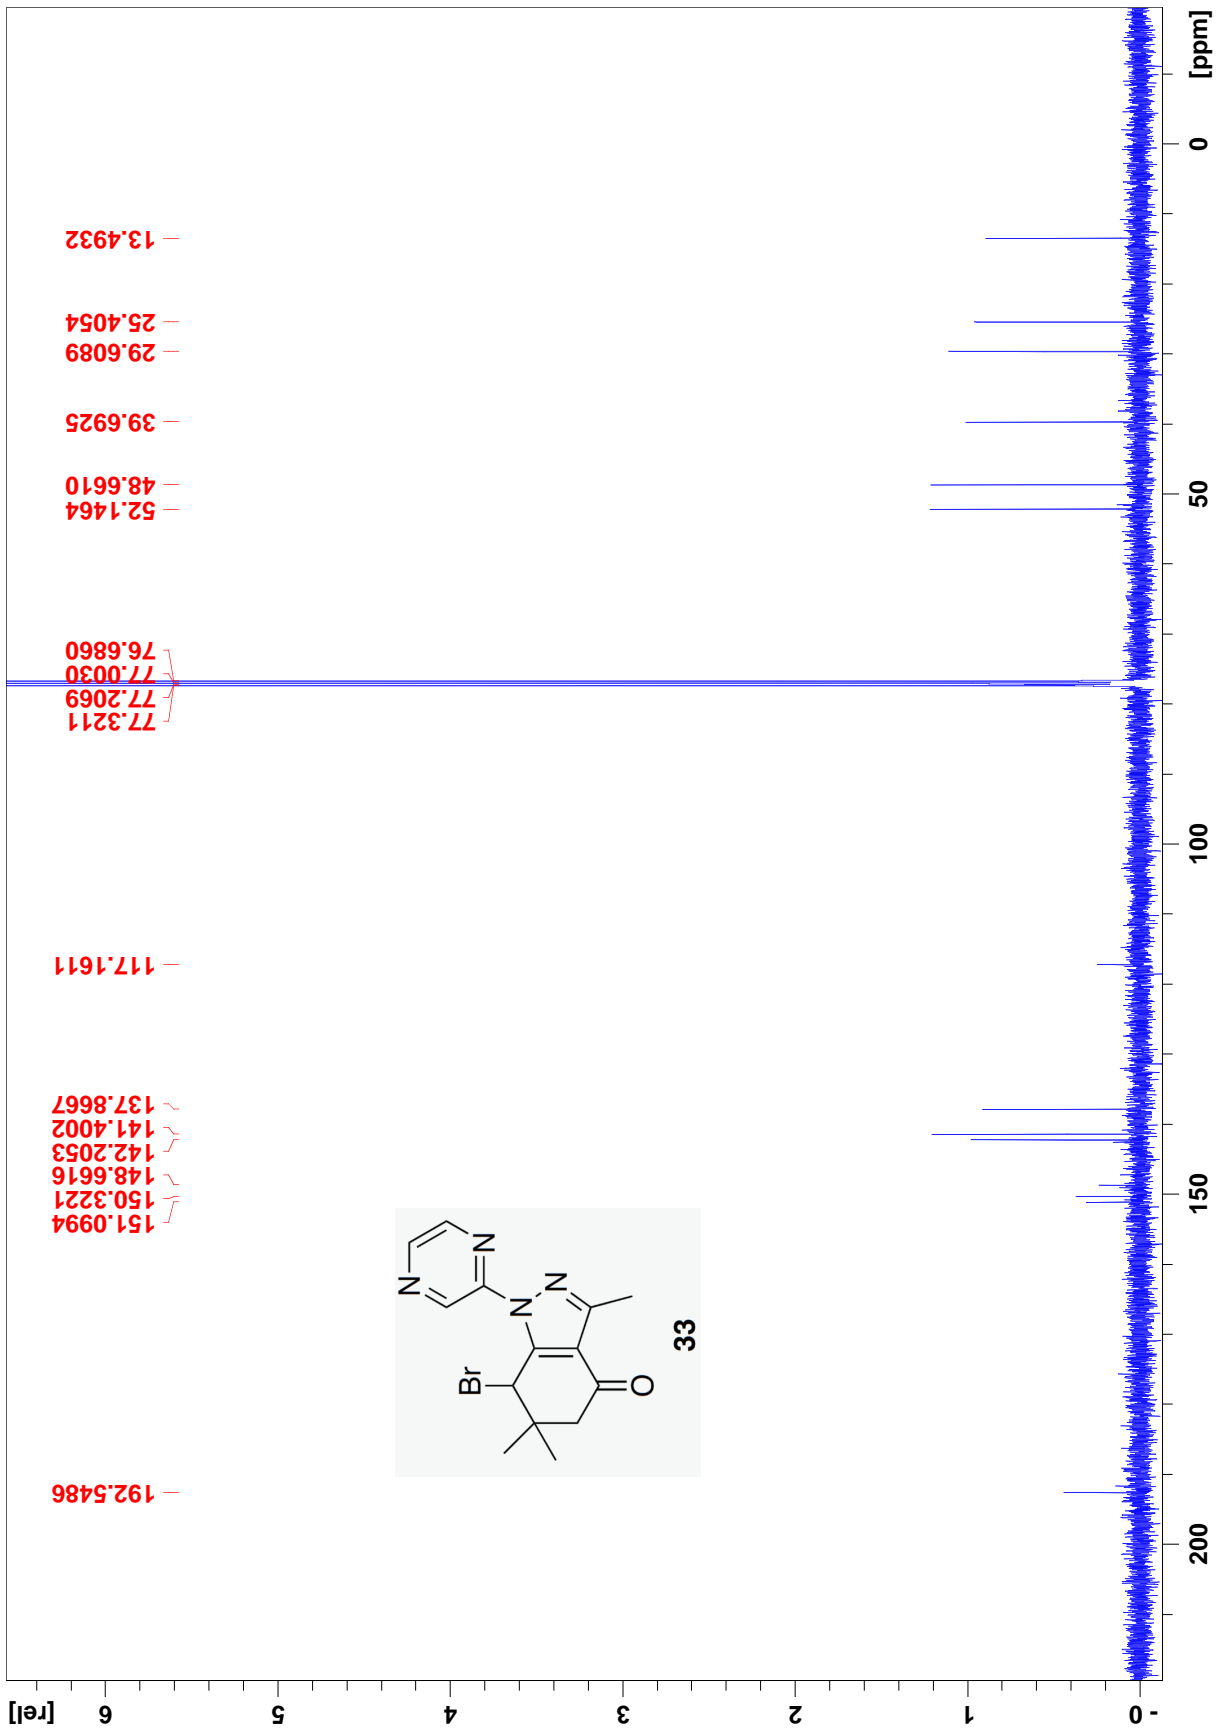

# 1H-NMR

JL110-080610 1 1 C:\Bruker\TOPSPIN leex3451

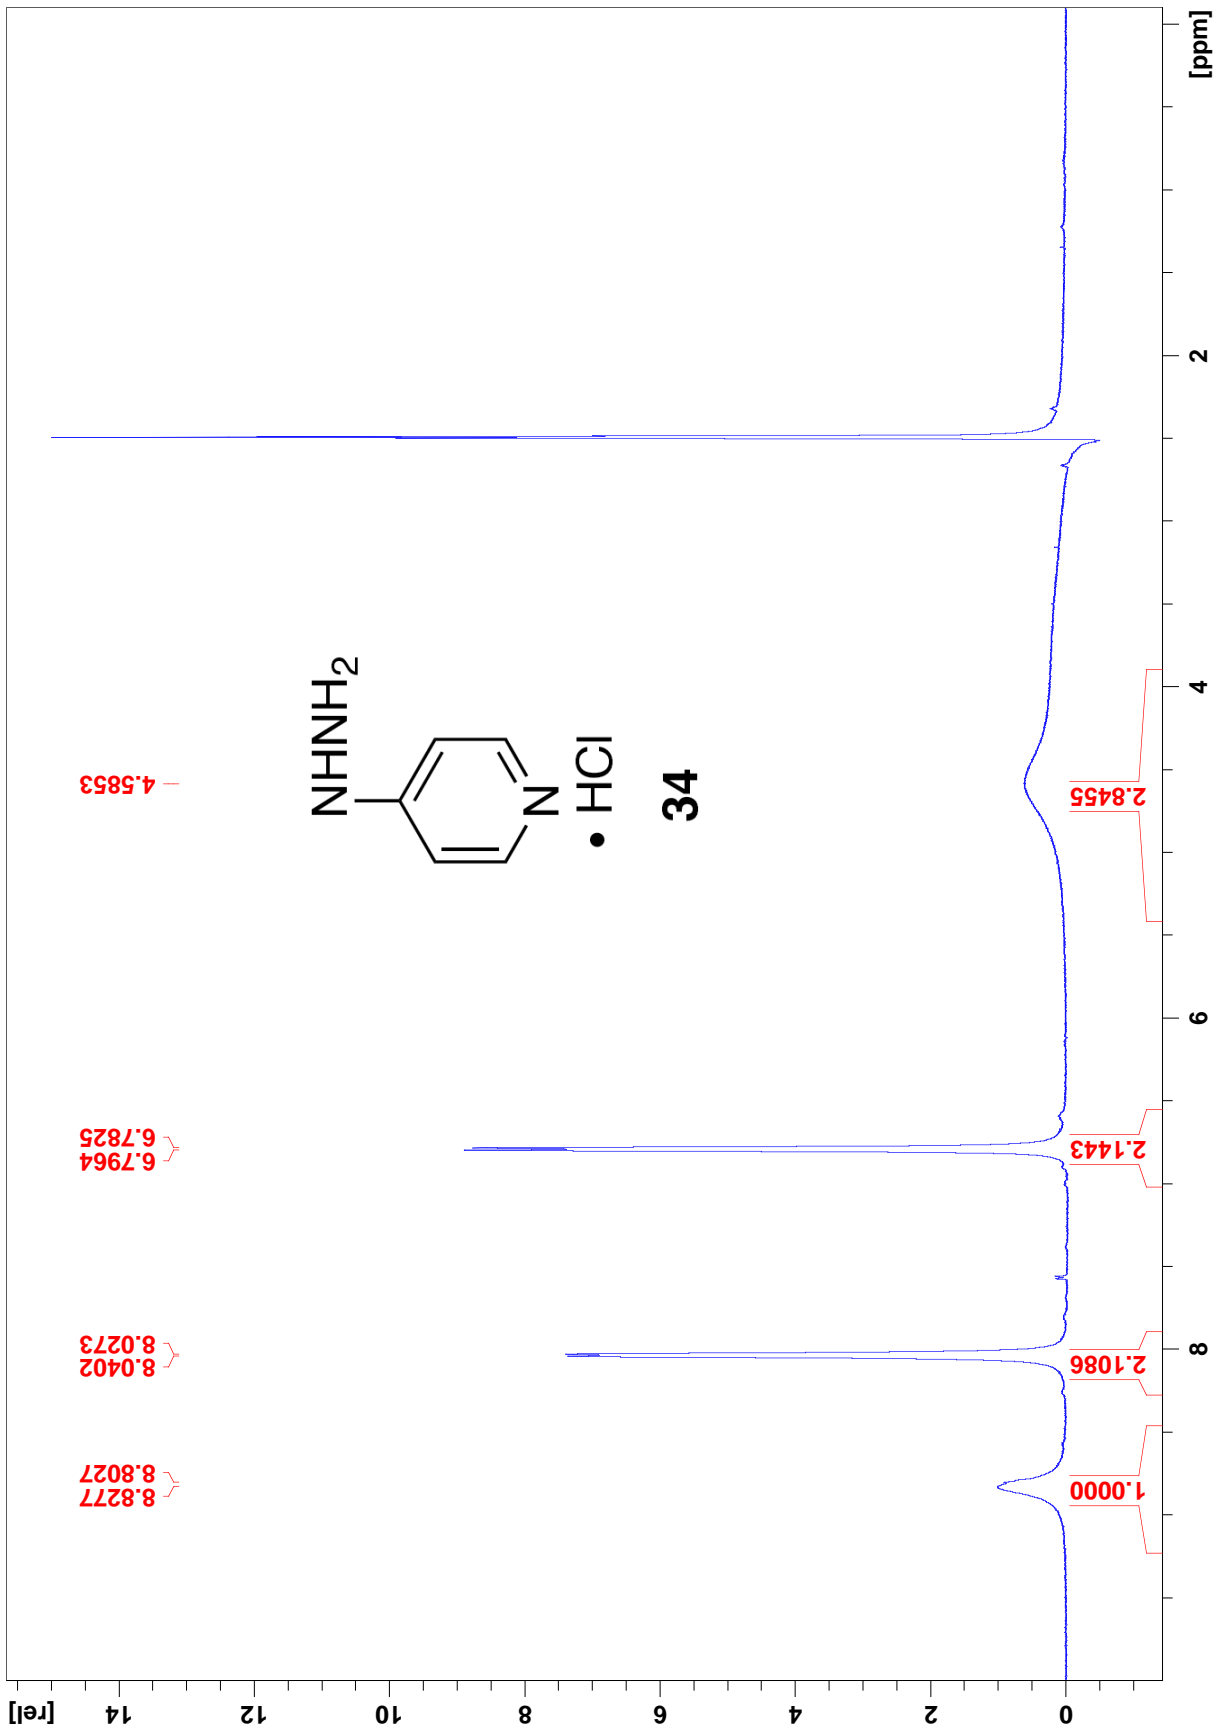

# 13C-NMR

JL10-080610 3 1 C:\Bruker\TOPSPIN leex3451

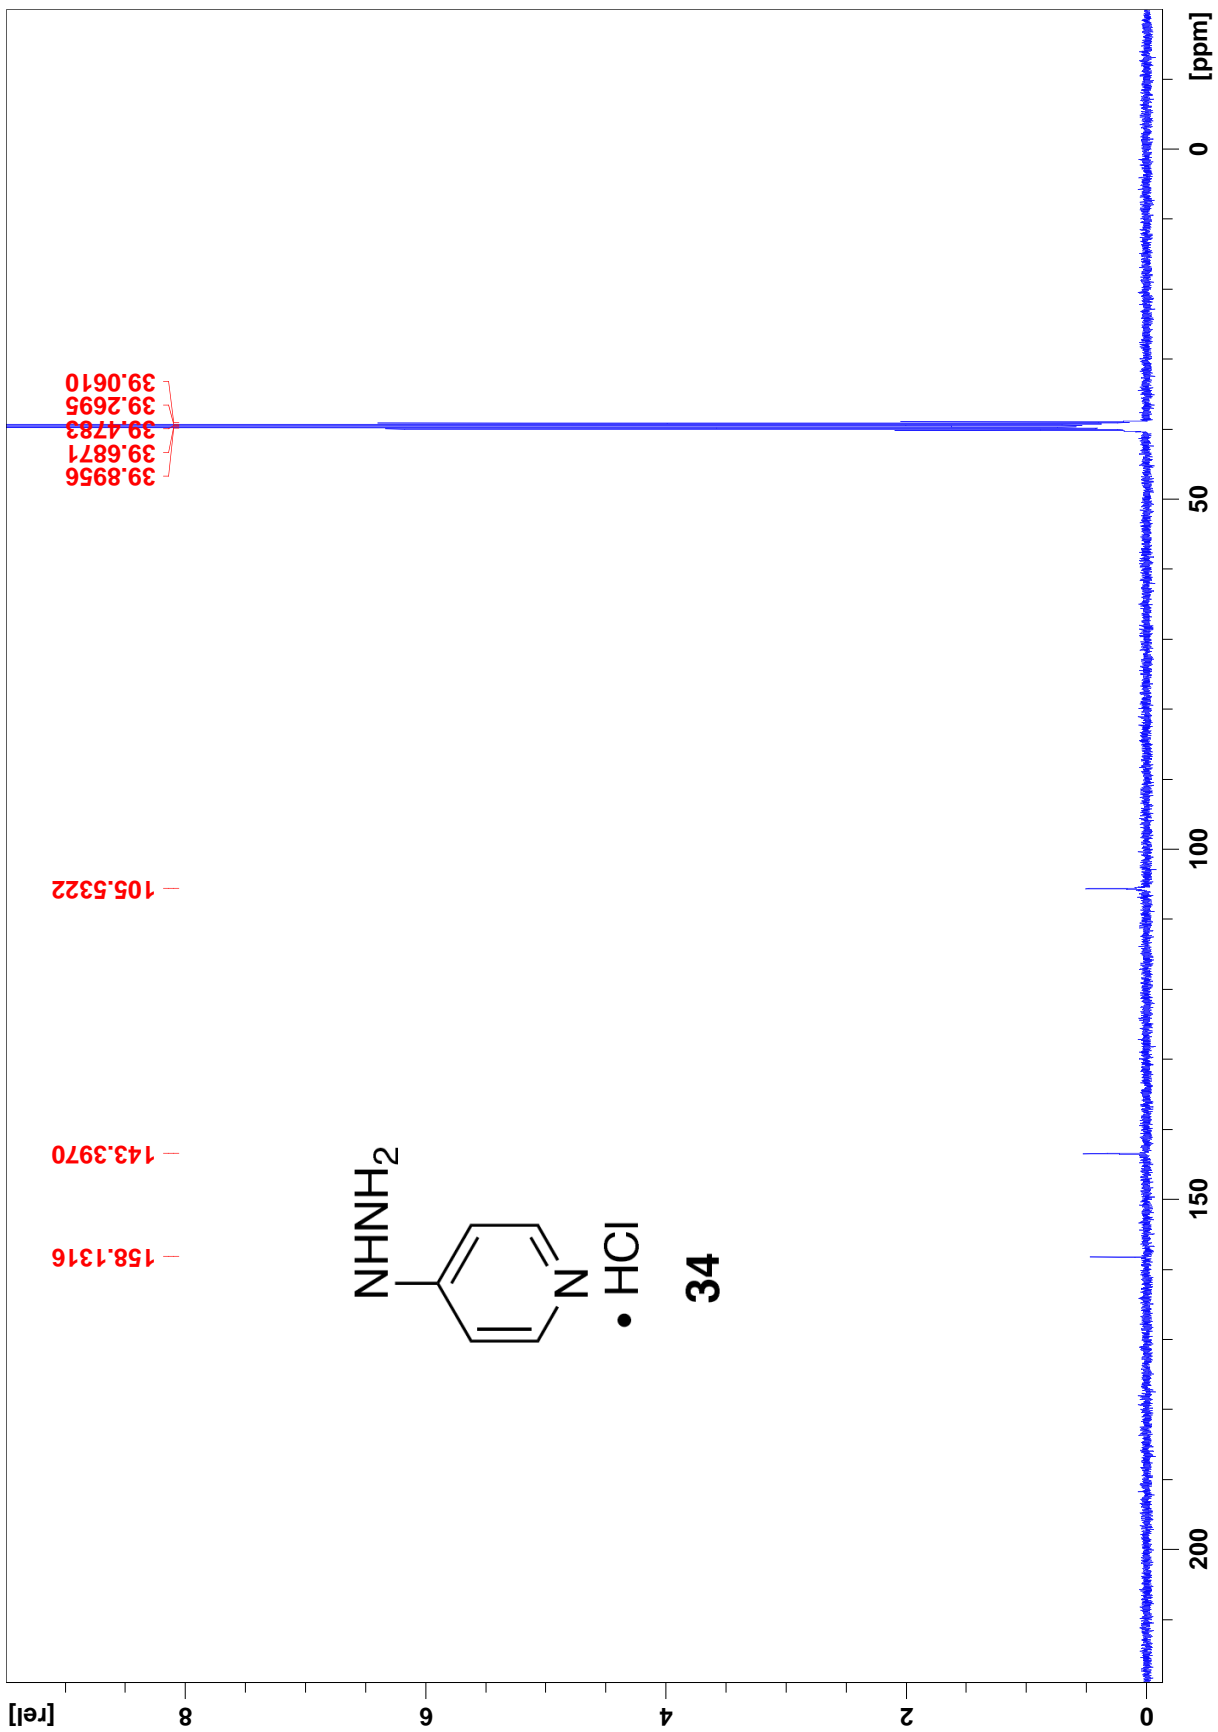

# 1H-NMR

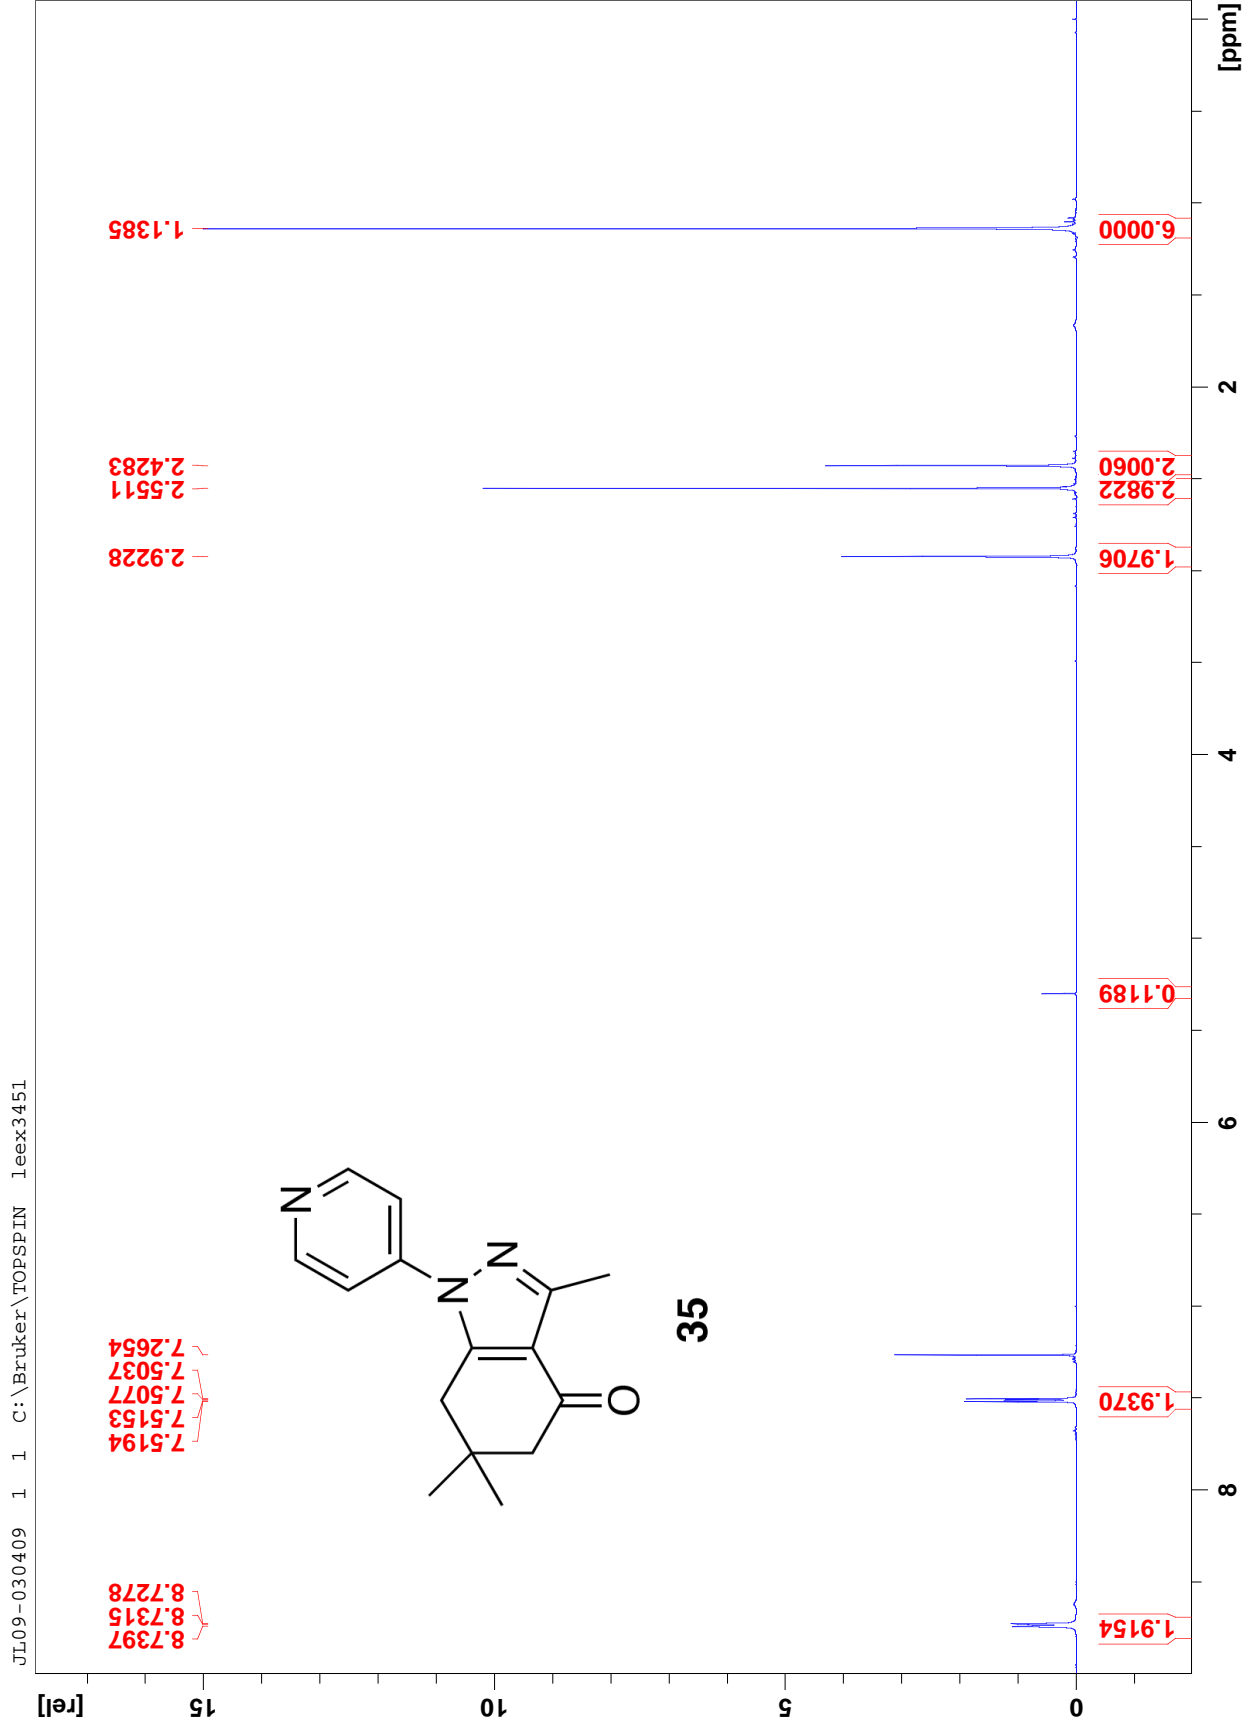

# 13C-NMR

JL09-030409 3 1 C:\Bruker\TOPSPIN leex3451

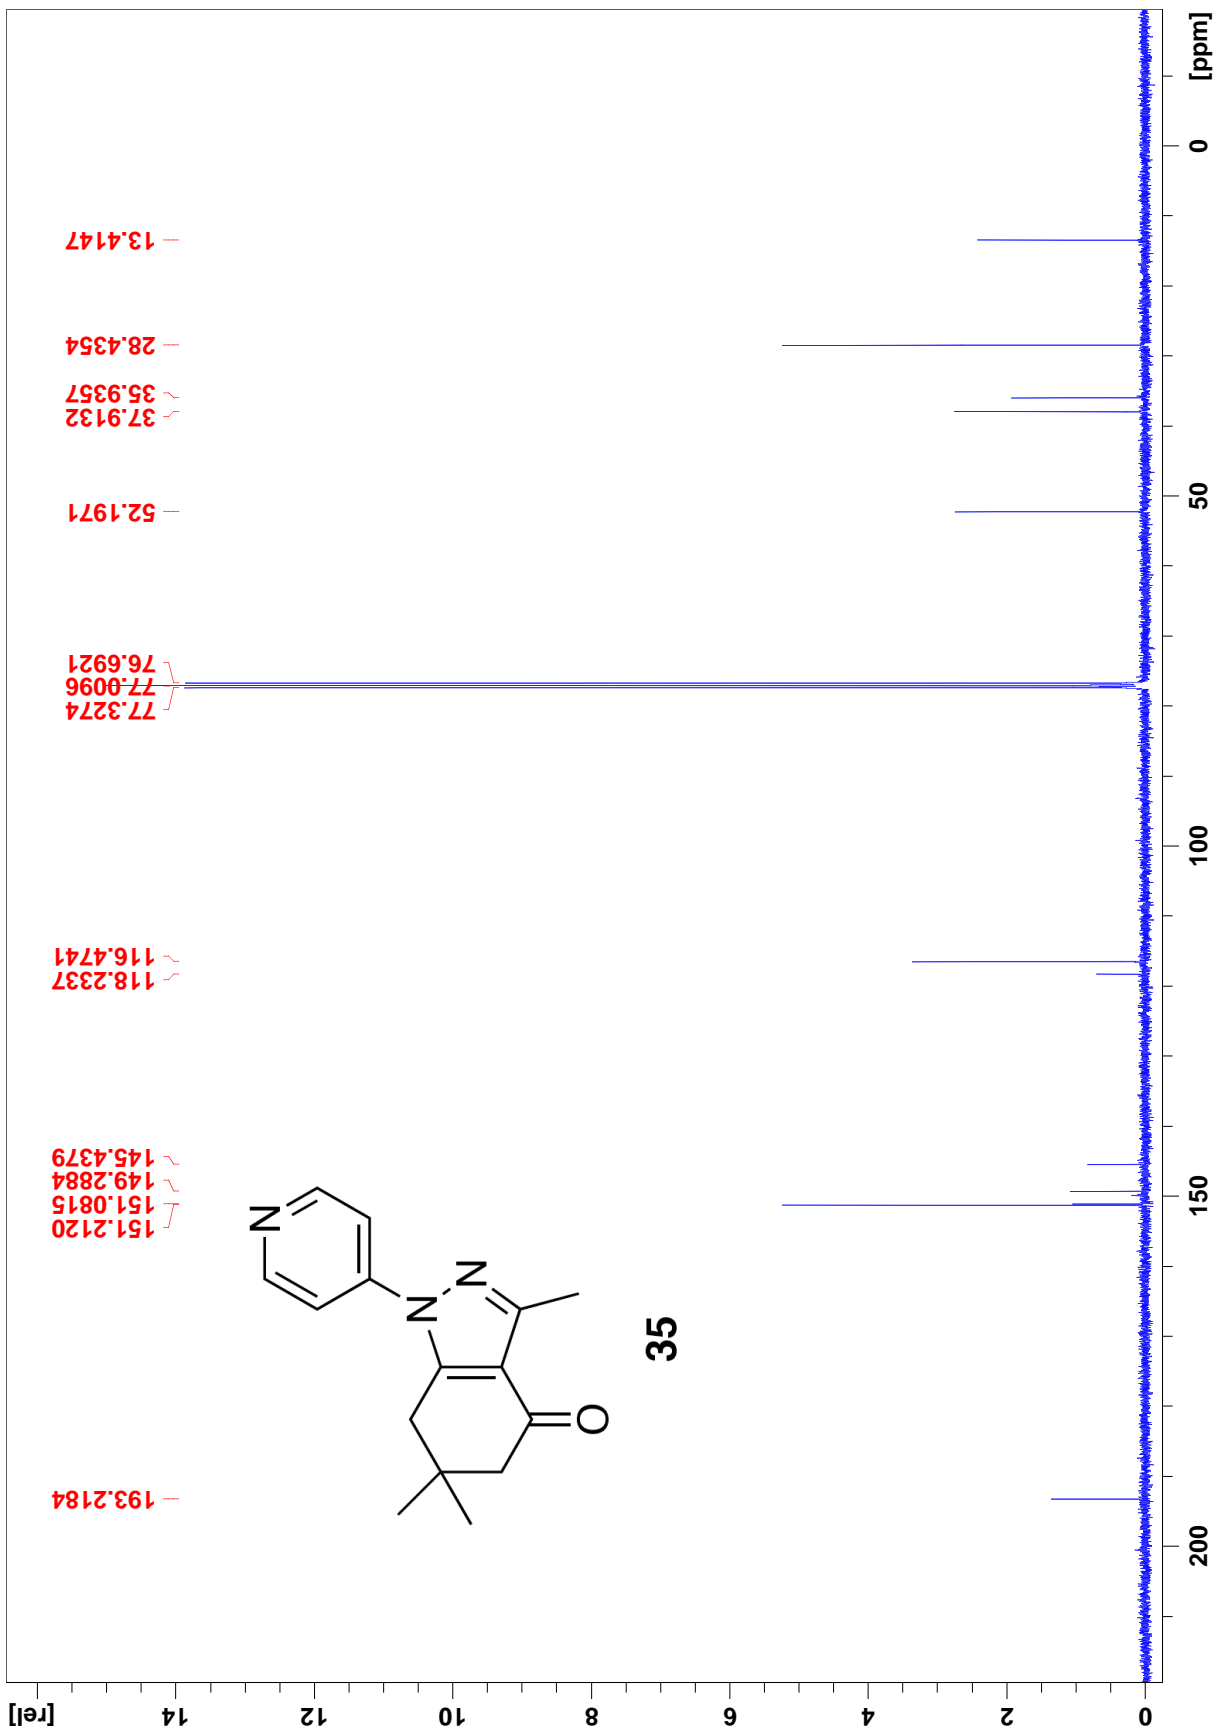

# 1H-NMR

JL09-031109 1 1 C:\Bruker\TOPSPIN leex3451

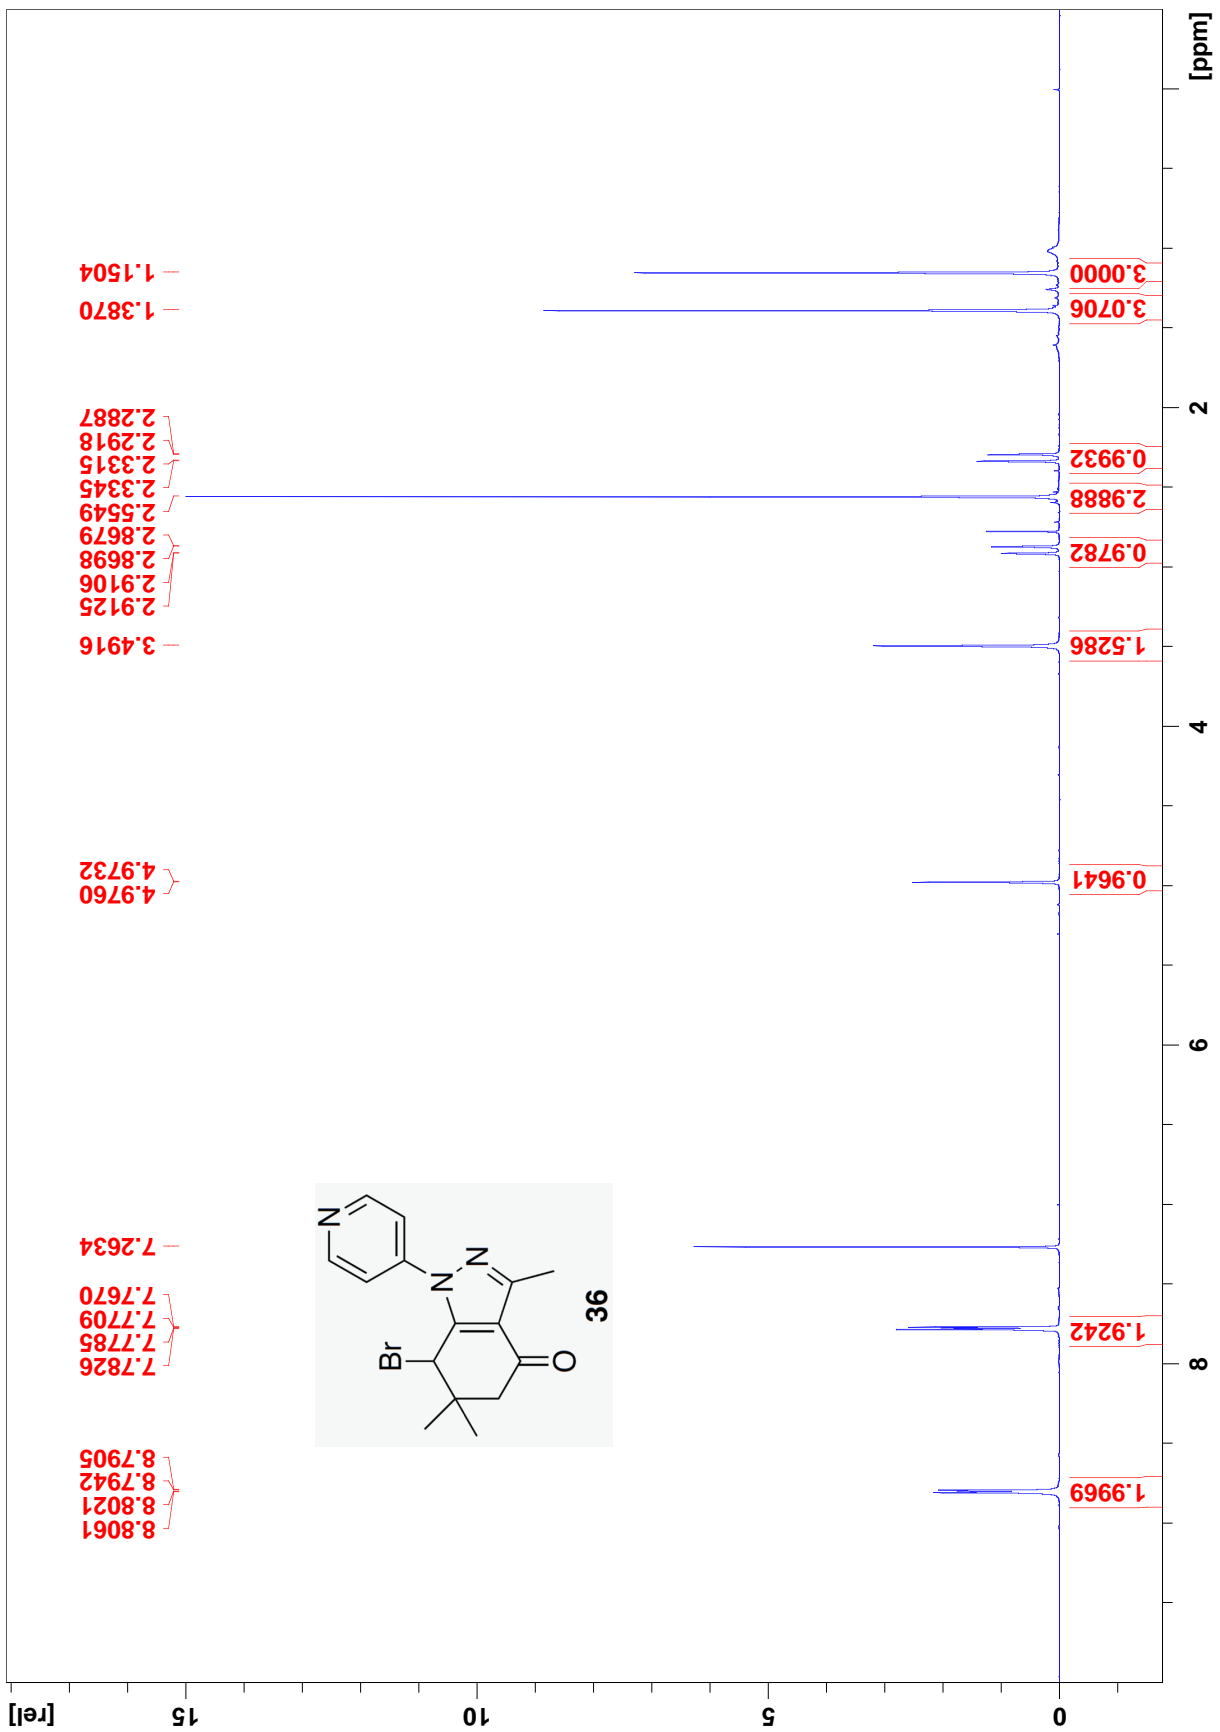



# 13C-NMR

JL09-031109 3 1 C:\Bruker\TOPSPIN leex3451

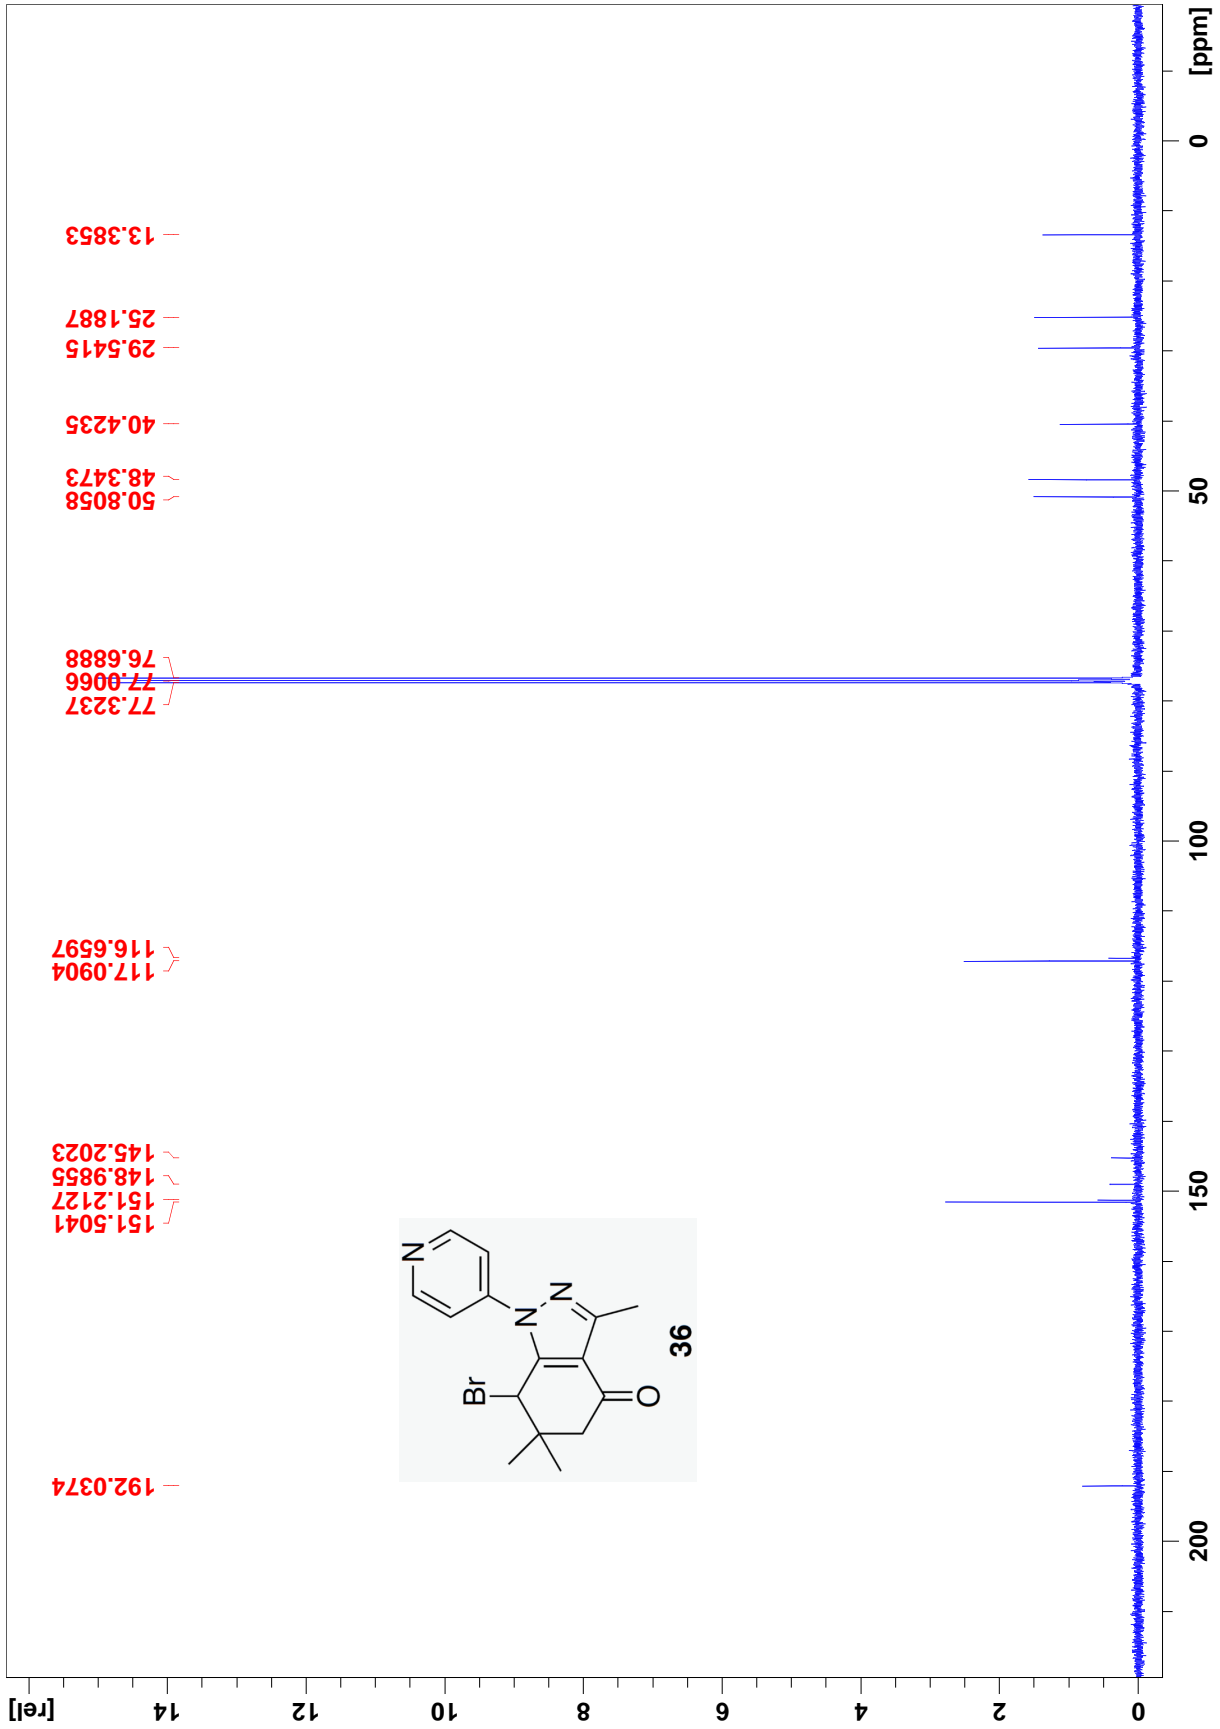

# 1H-NMR

JL09-052009 1 1 C:\Bruker\TOPSPIN leex3451

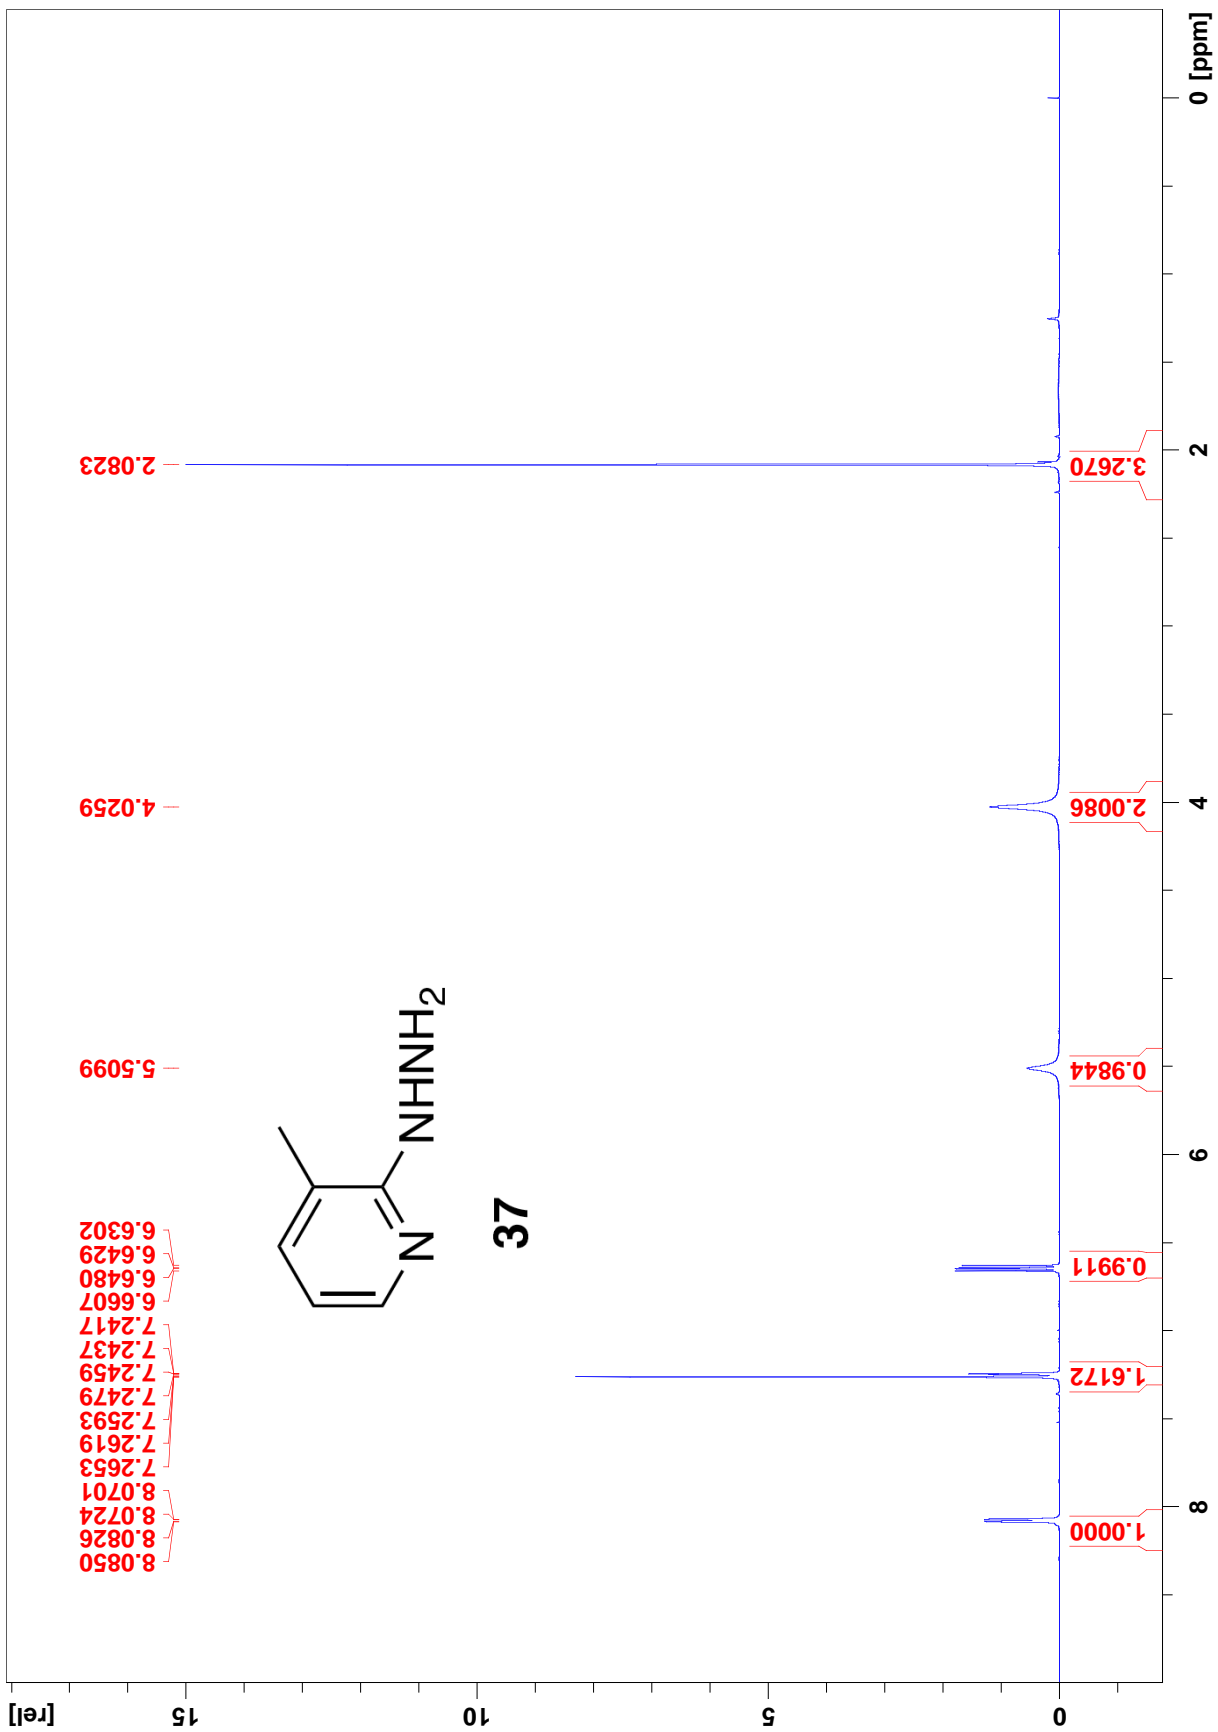

# 13C-NMR

JL09-052009 3 1 C:\Bruker\TOPSPIN leex3451

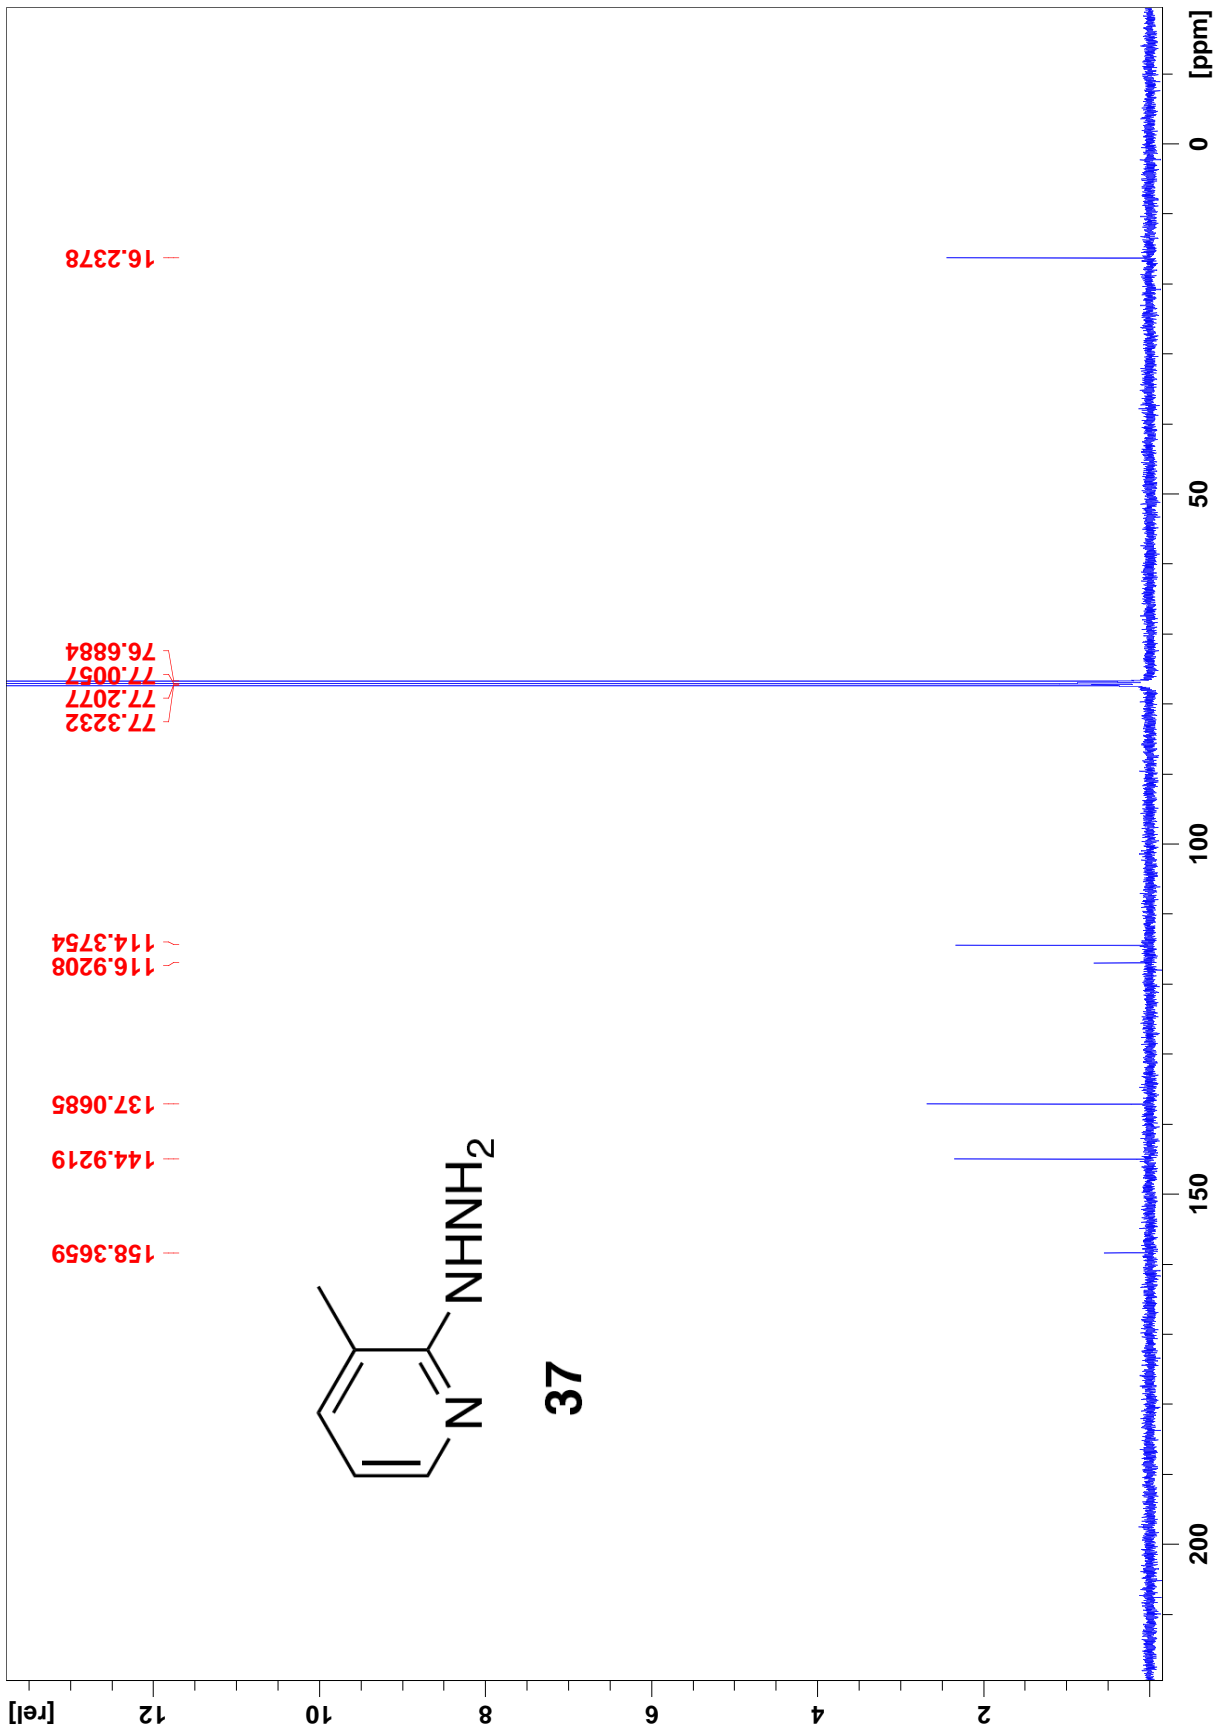

# 1H-NMR

JL09-060509 1 1 C:\Bruker\TOPSPIN leex3451

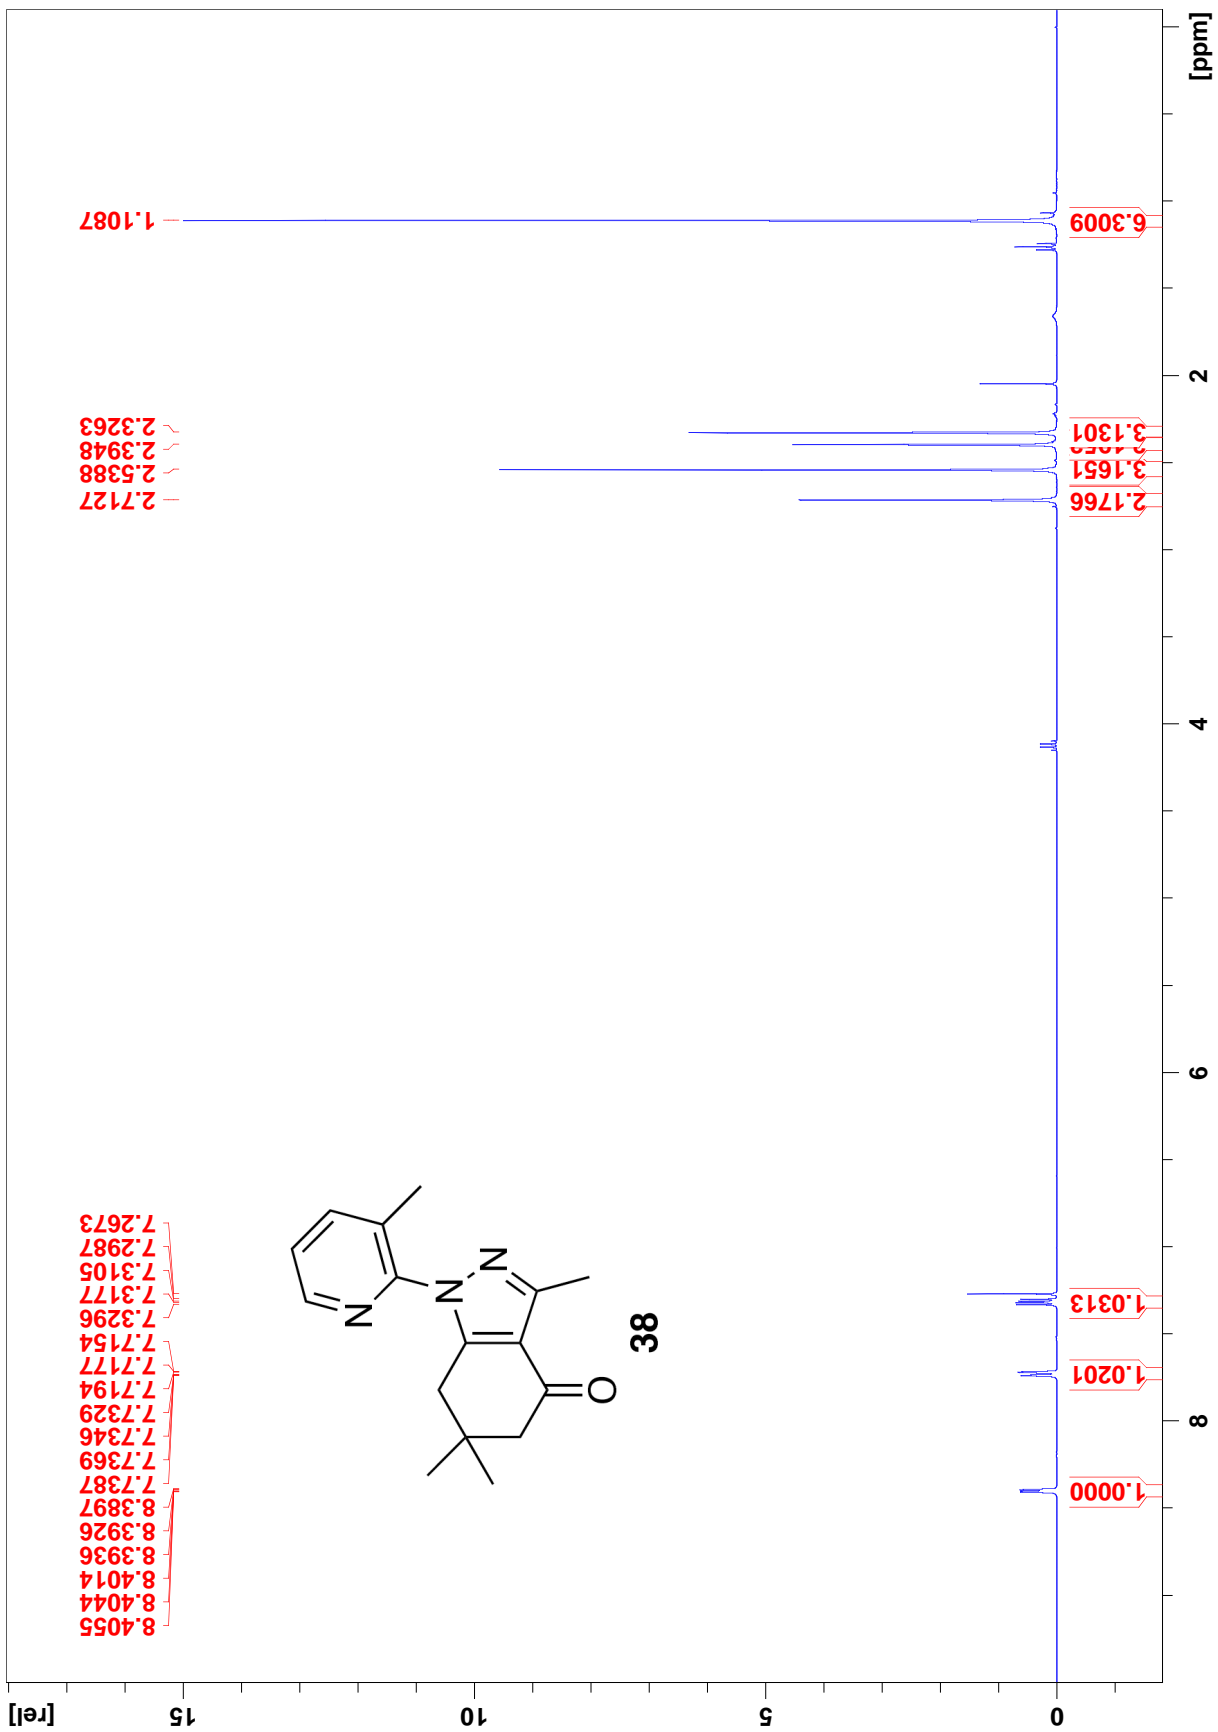

# 13C-NMR

JL09-060509 3 1 C:\Bruker\TOPSPIN leex3451

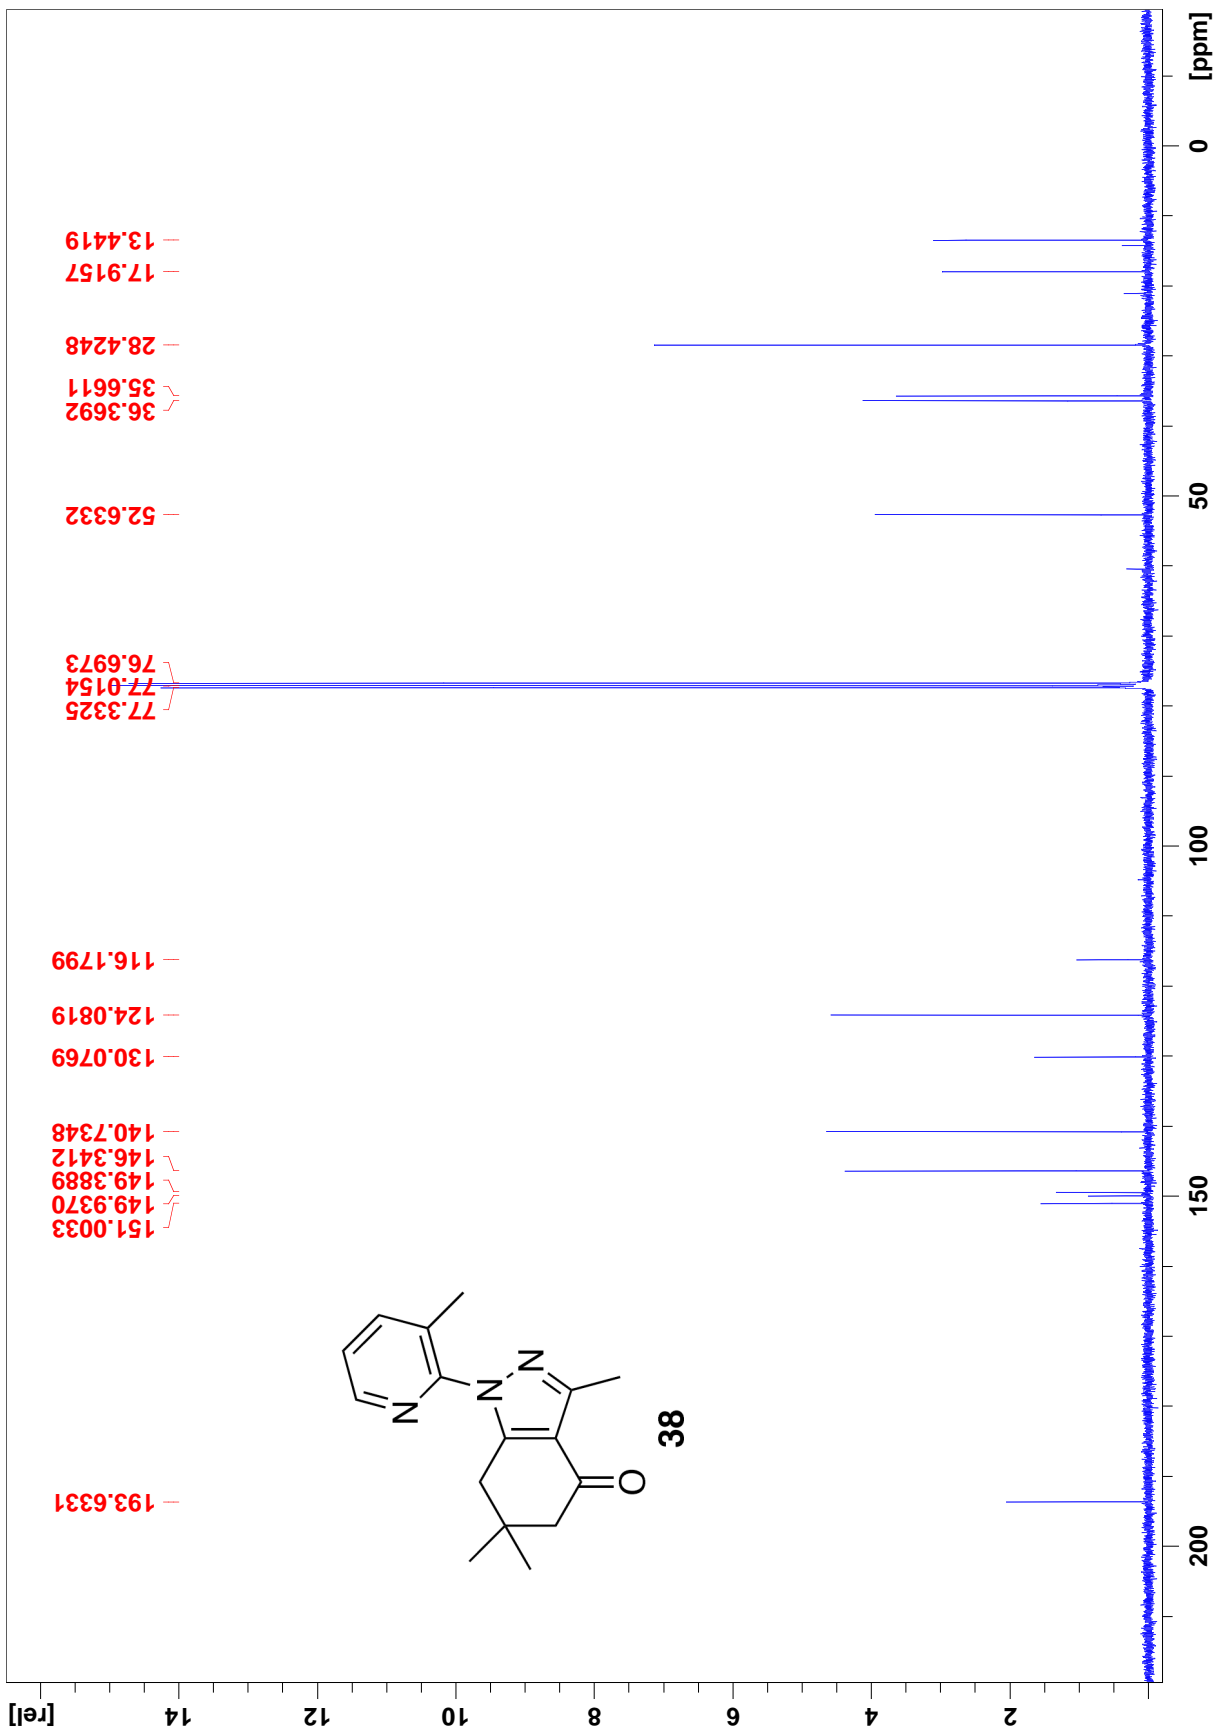

# 1H-NMR

JL09-072709 1 1 C:\Bruker\TOPSPIN leex3451

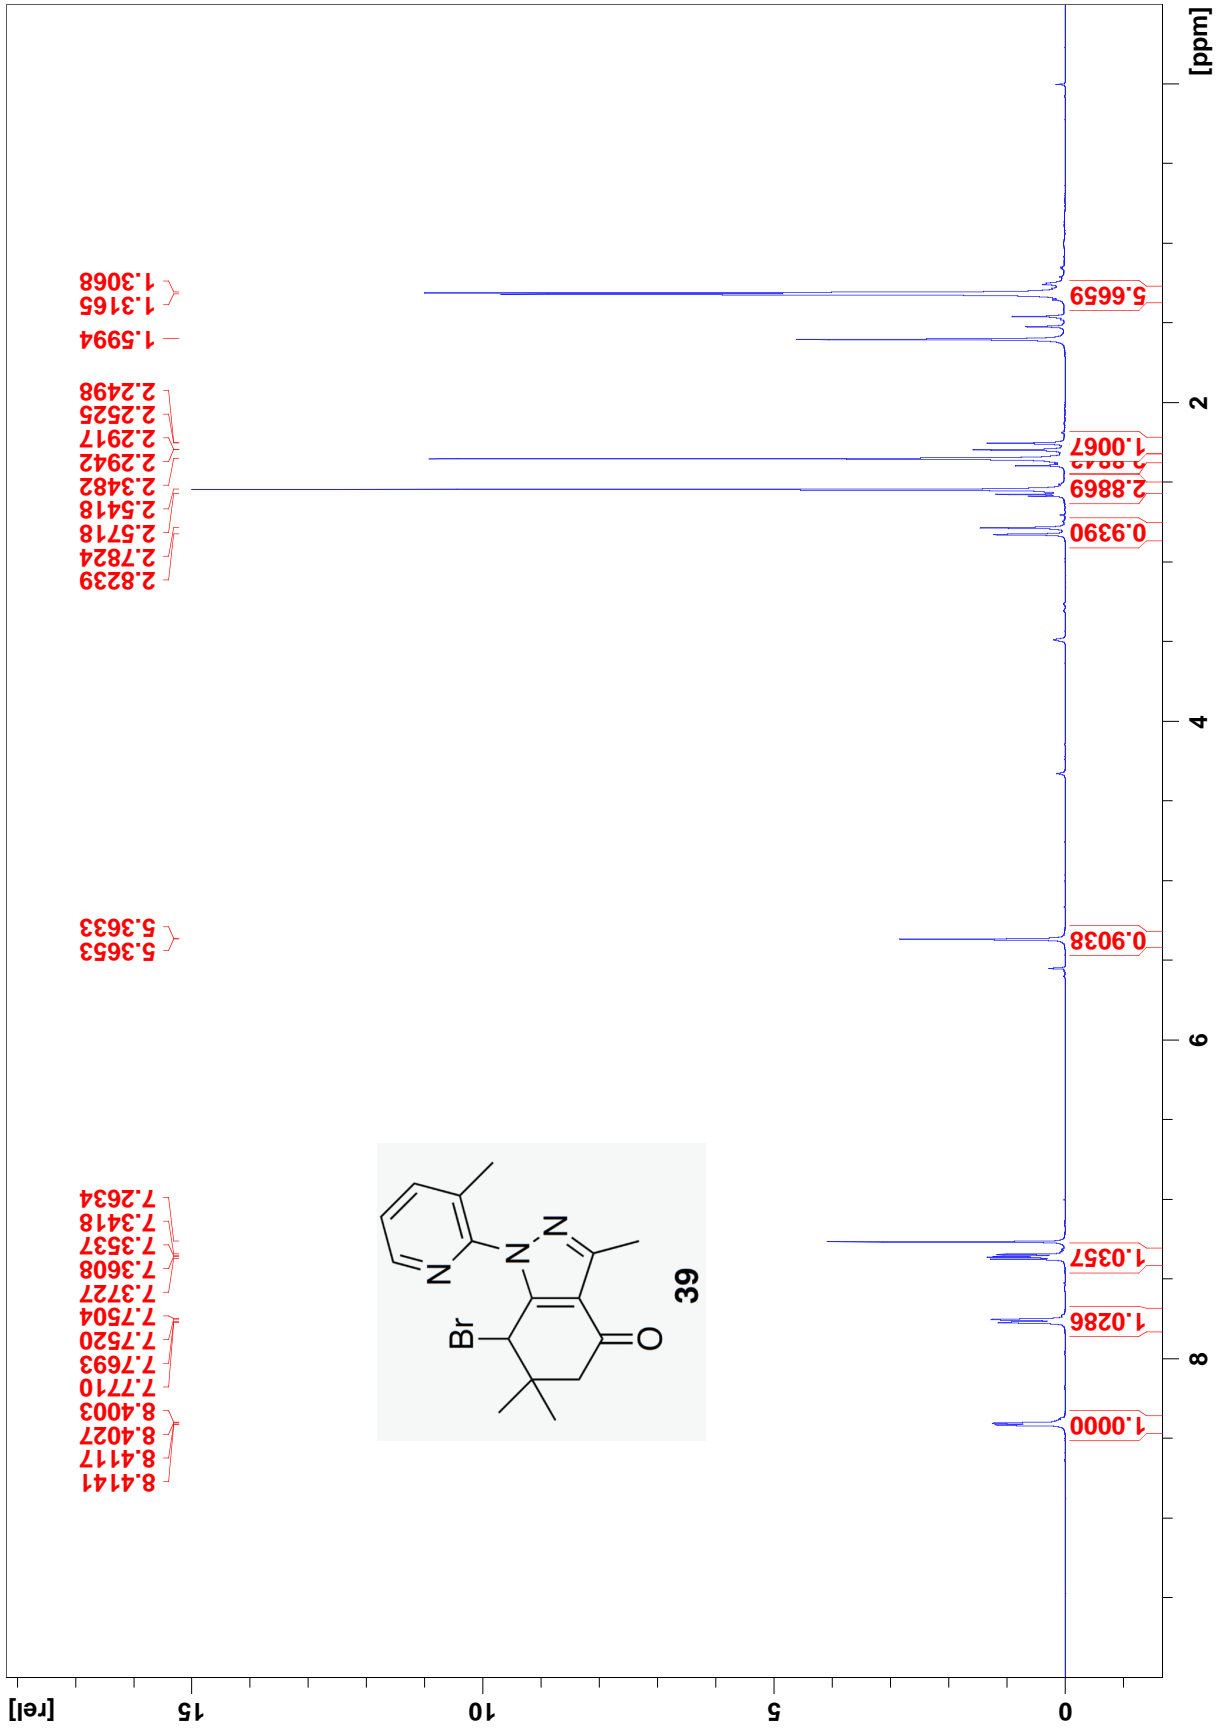

# 13C-NMR

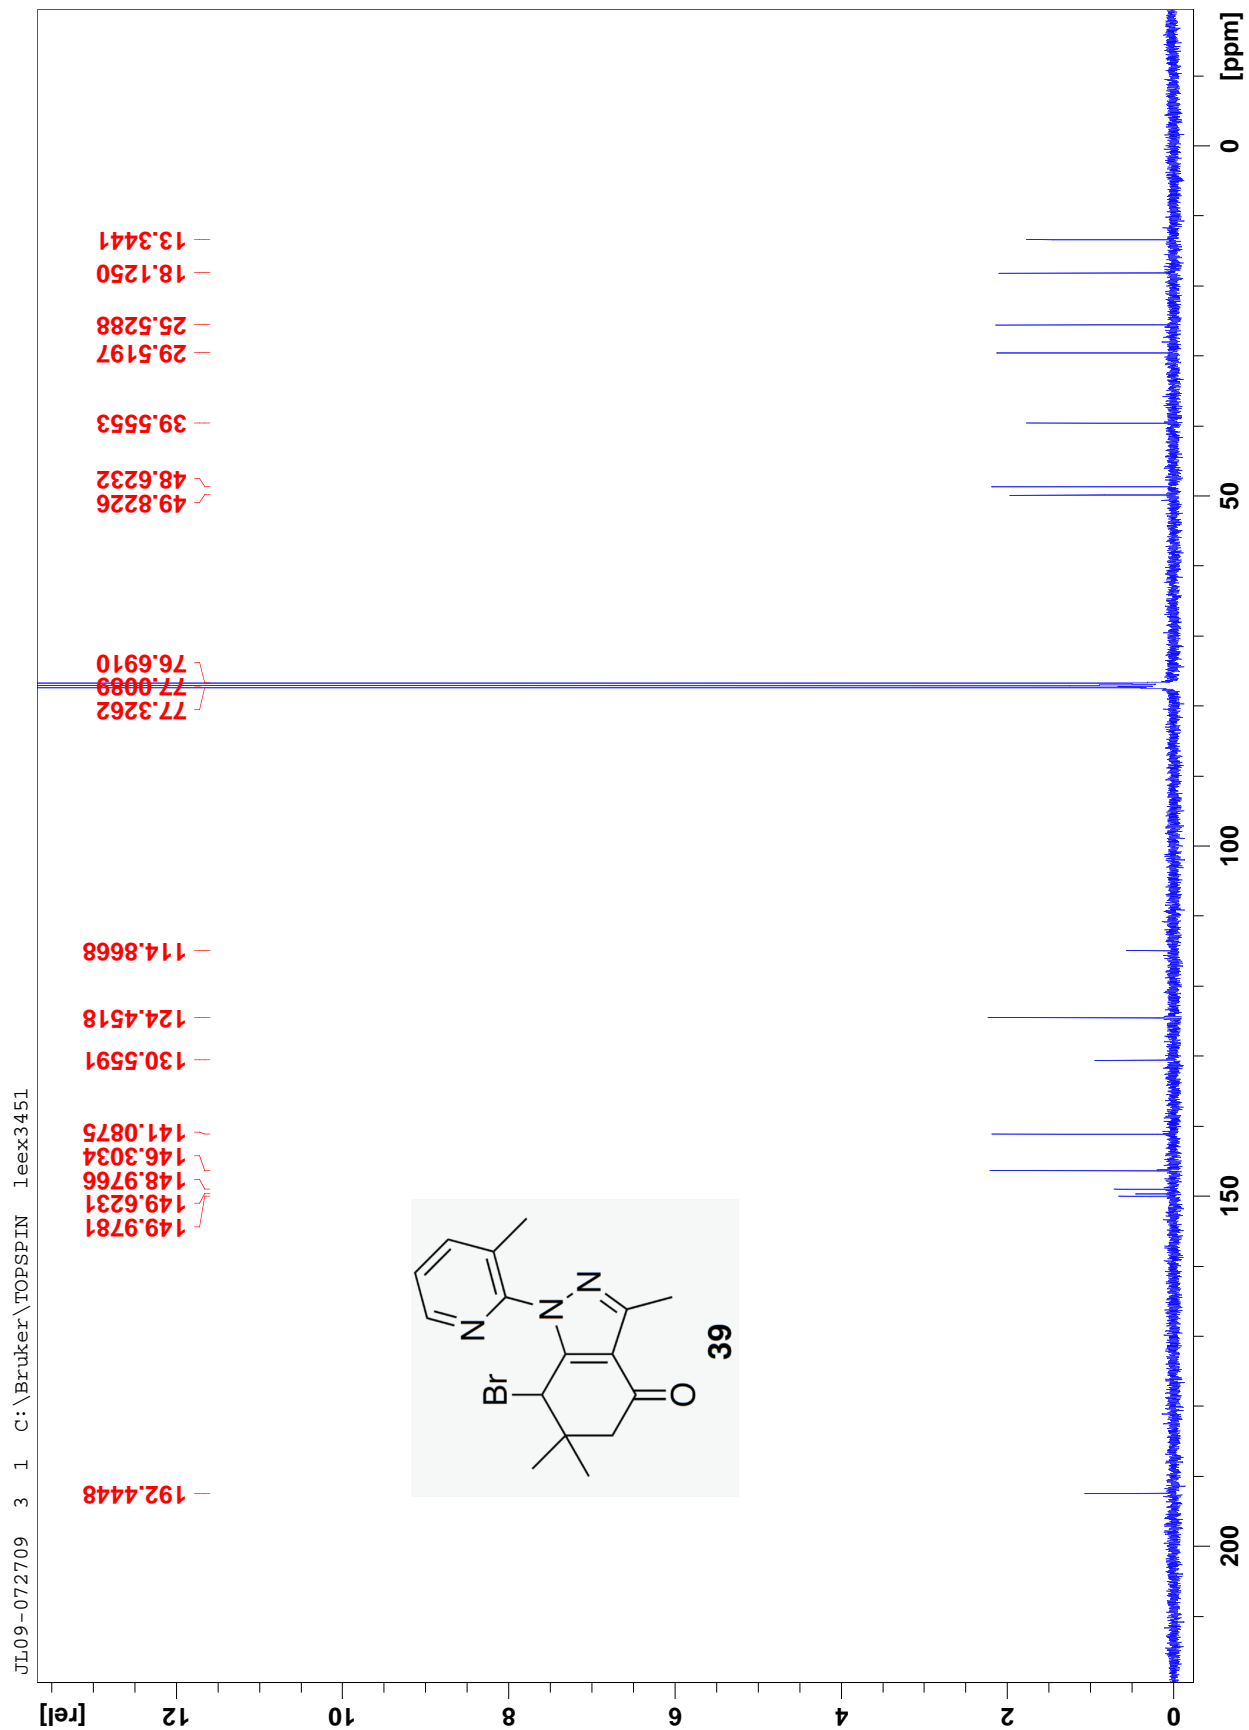

# 1H-NMR

JL09-070209B 1 1 C:\Bruker\TOPSPIN leex3451

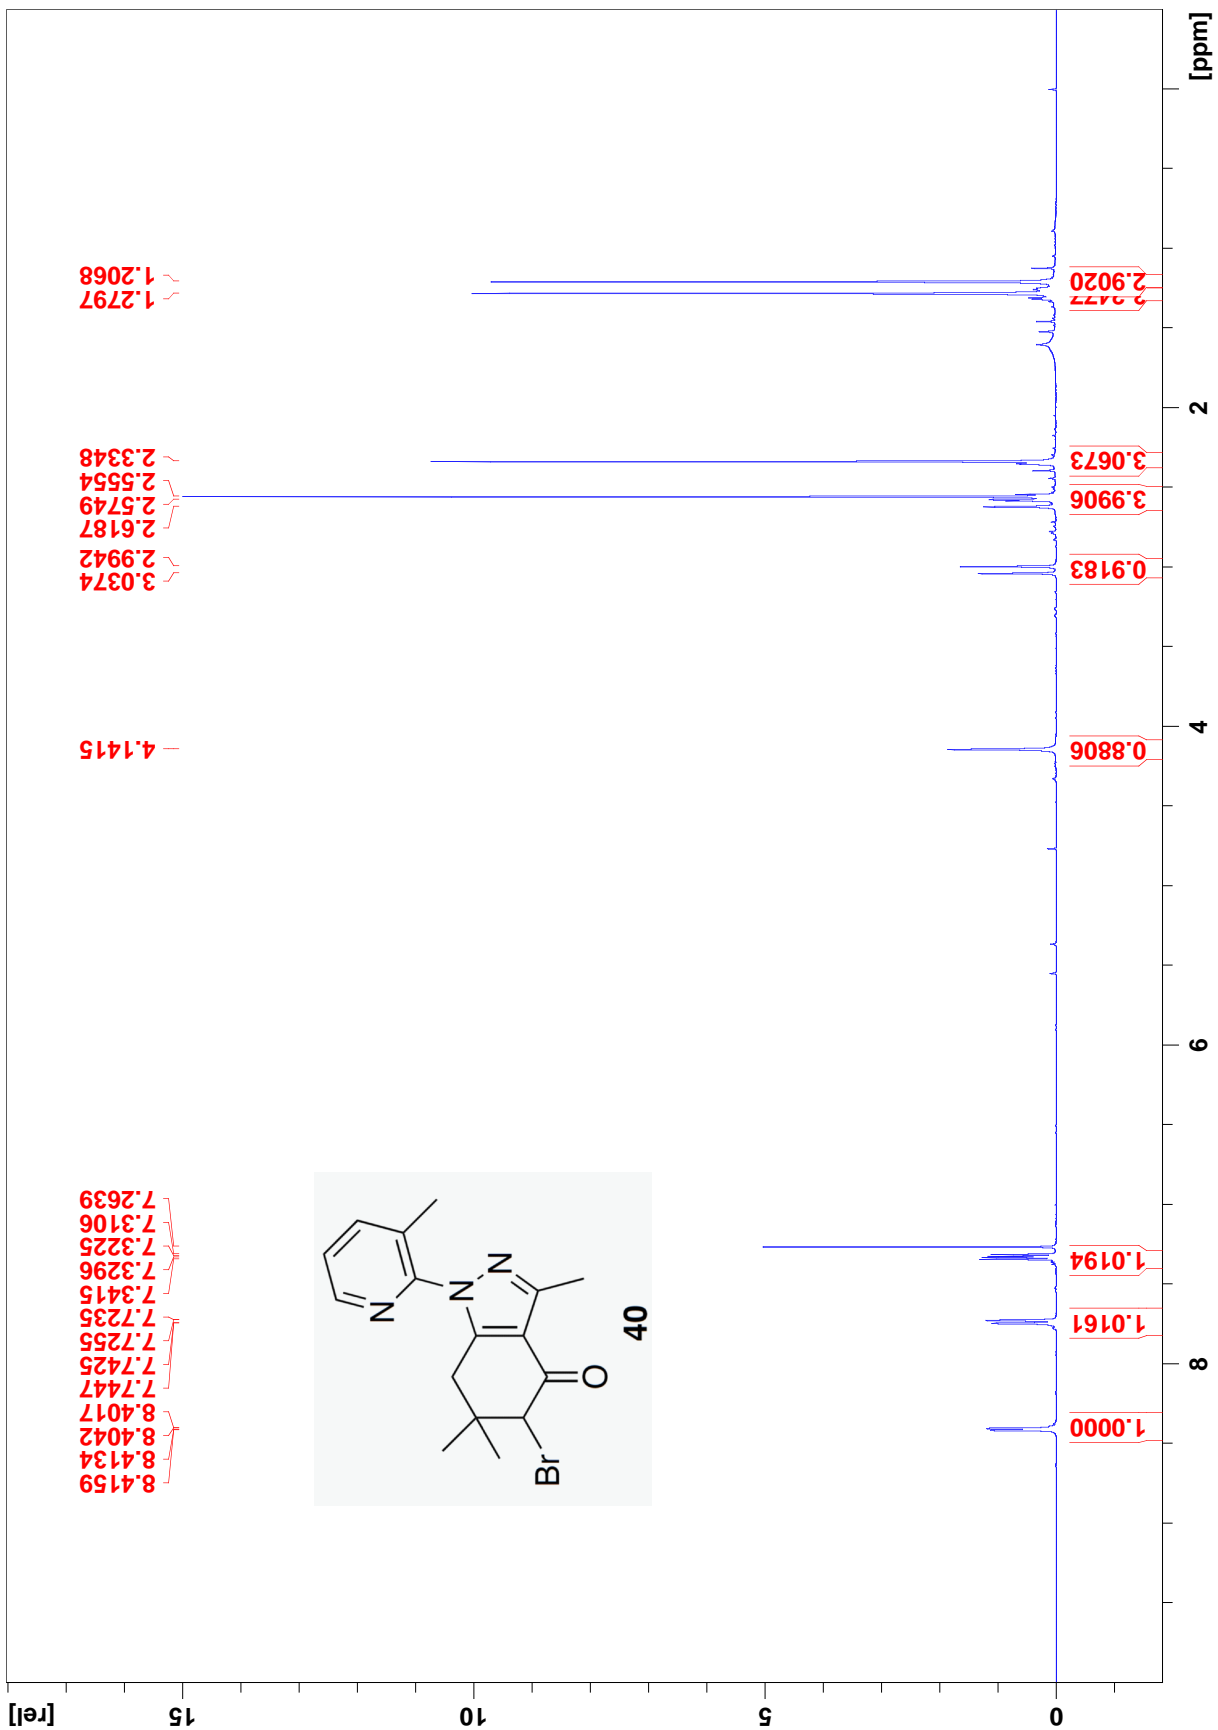



# 13C-NMR

JL09-070209B 3 1 C:\Bruker\TOPSPIN leex3451

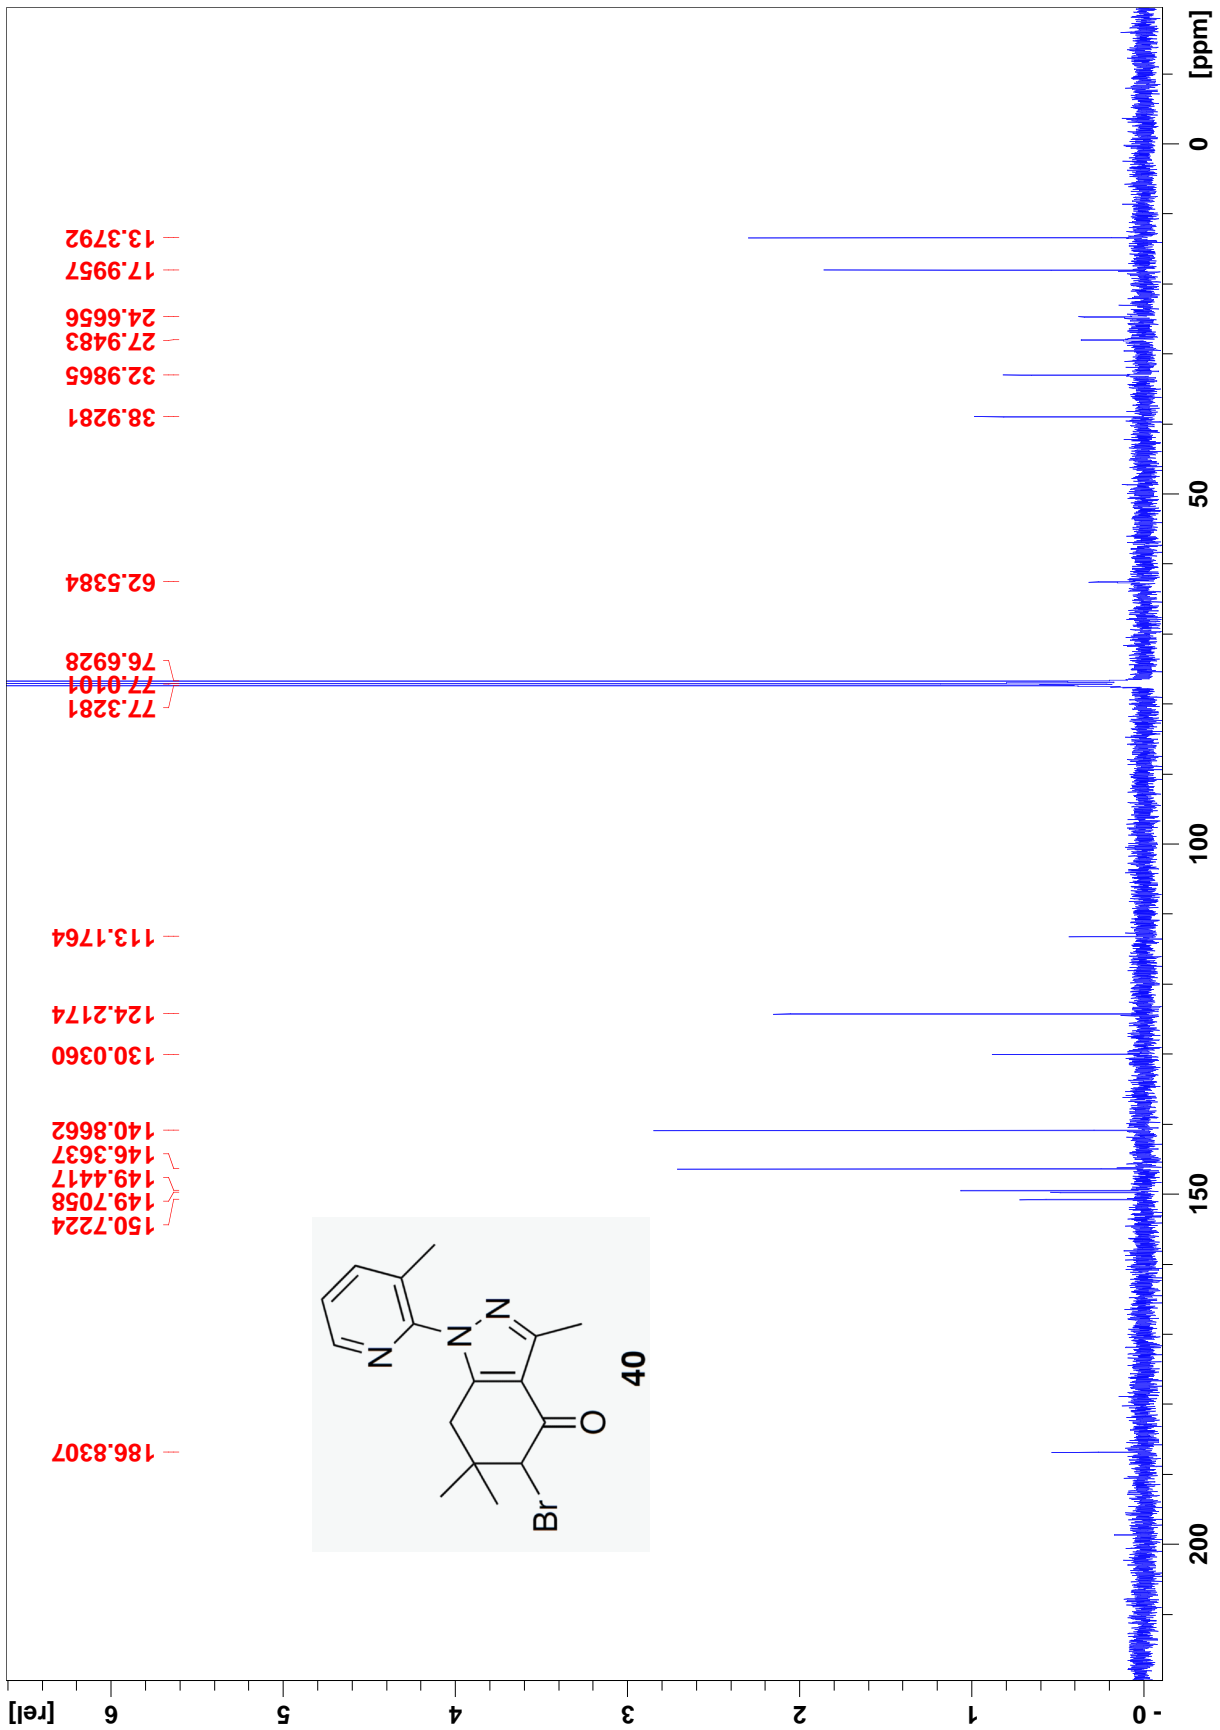

# 1H-NMR

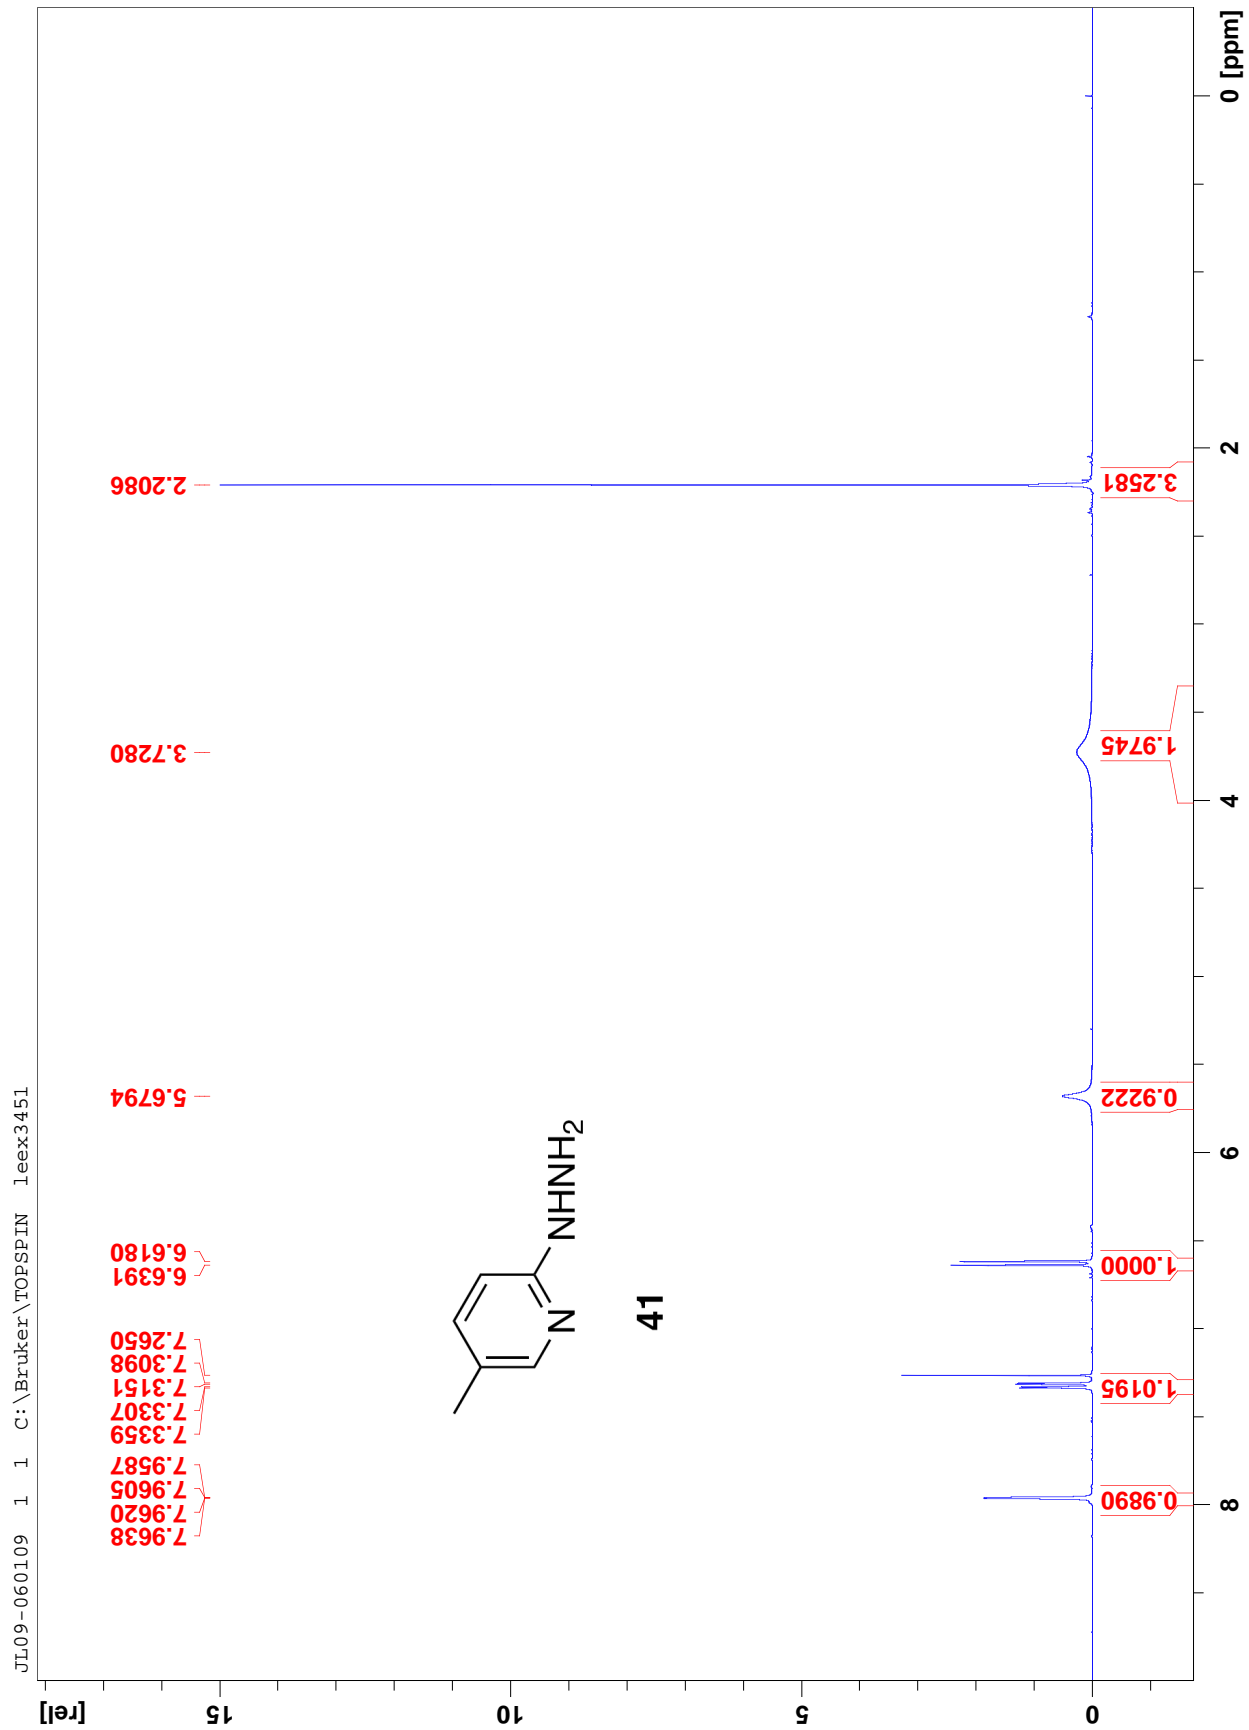

# 13C-NMR

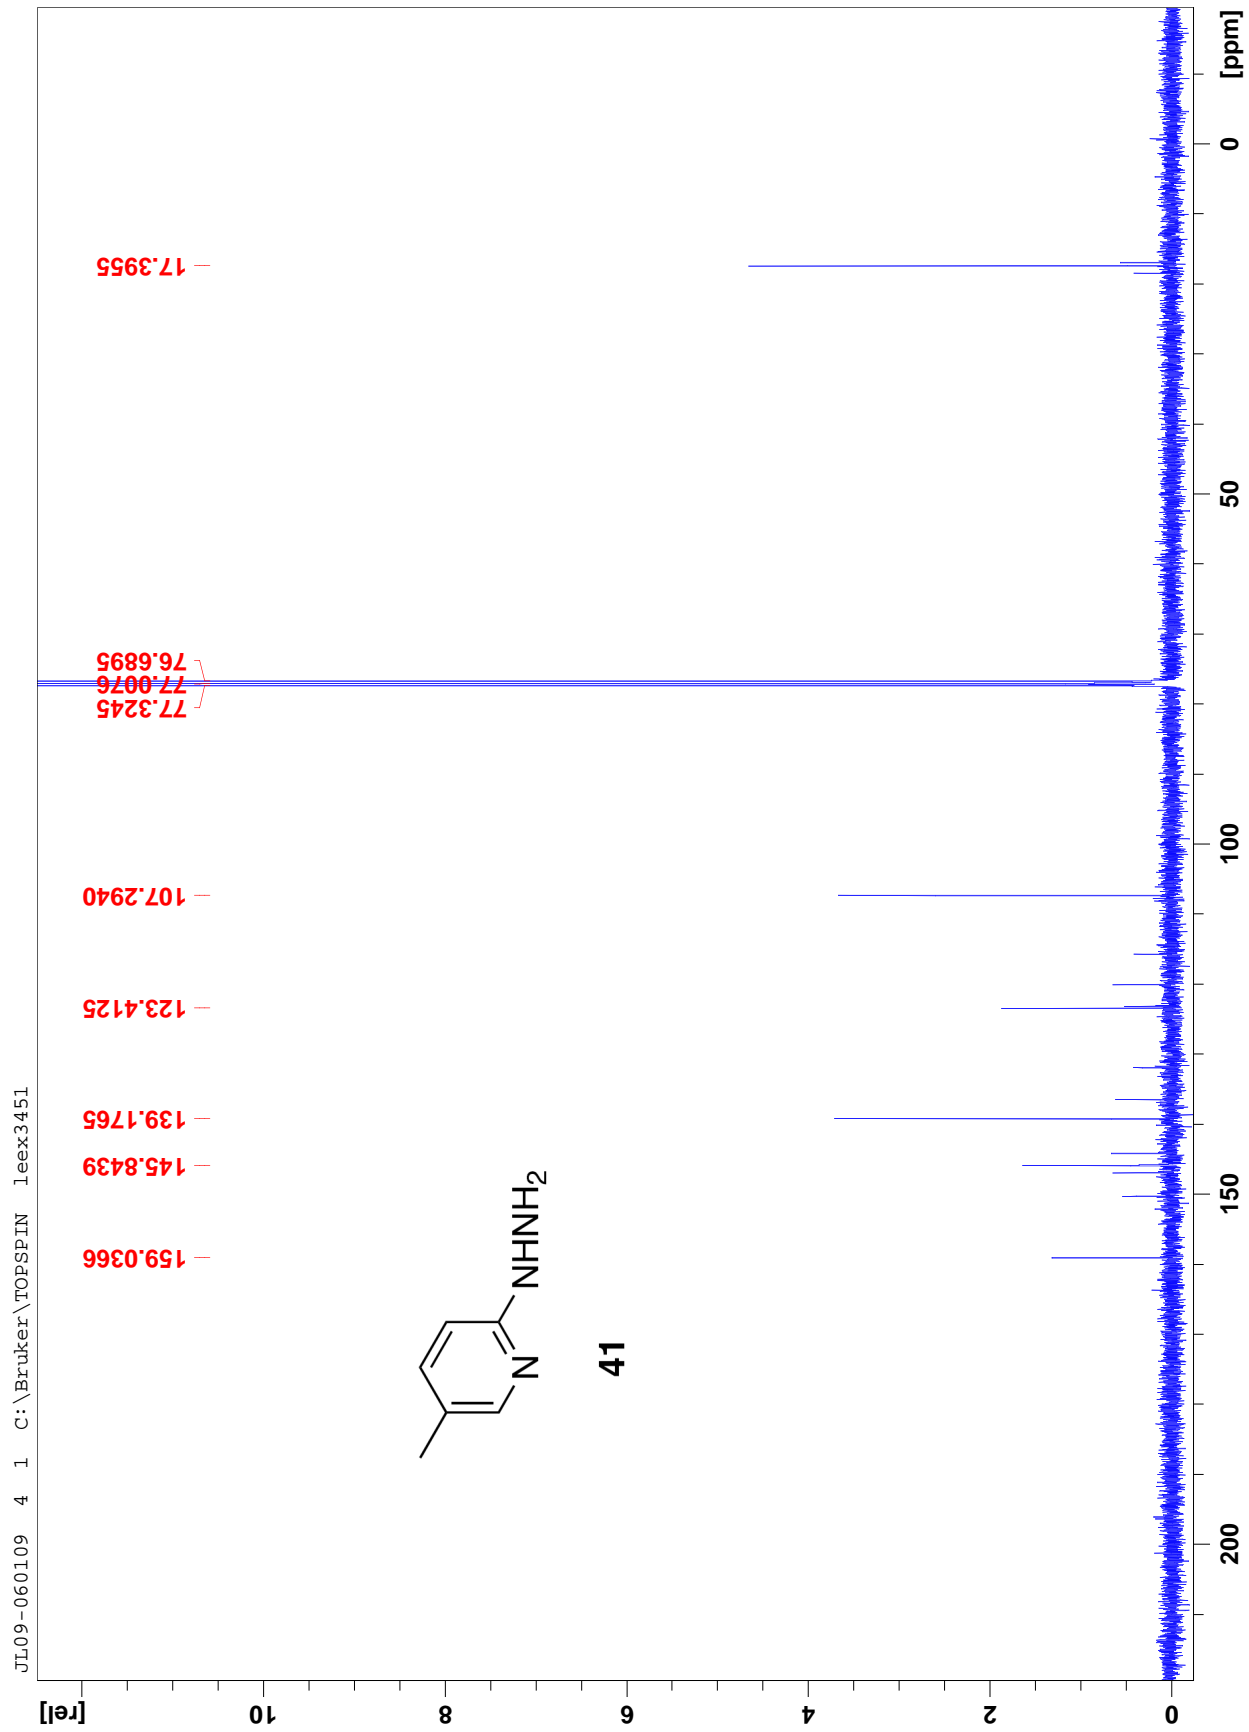

# 1H-NMR

JL09-060309 1 1 C:\Bruker\TOPSPIN leex3451

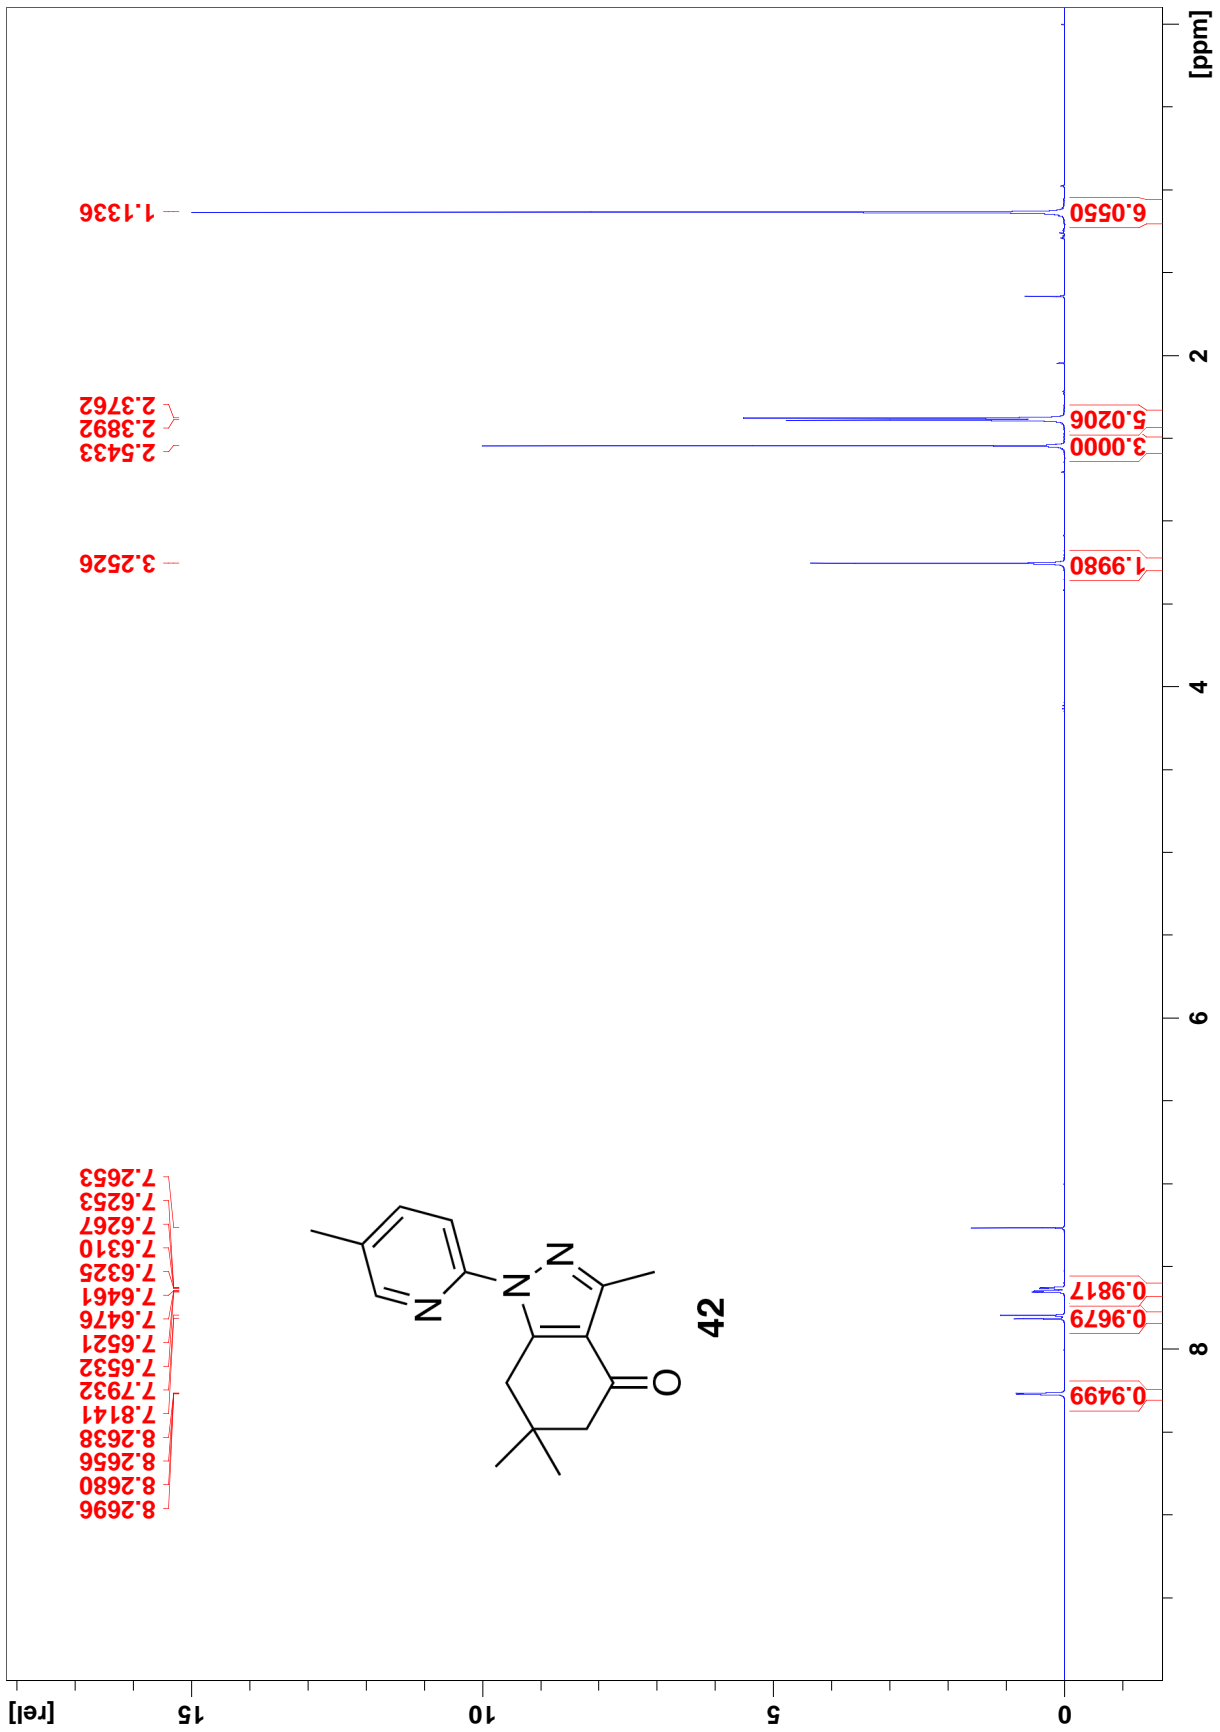

# 13C-NMR

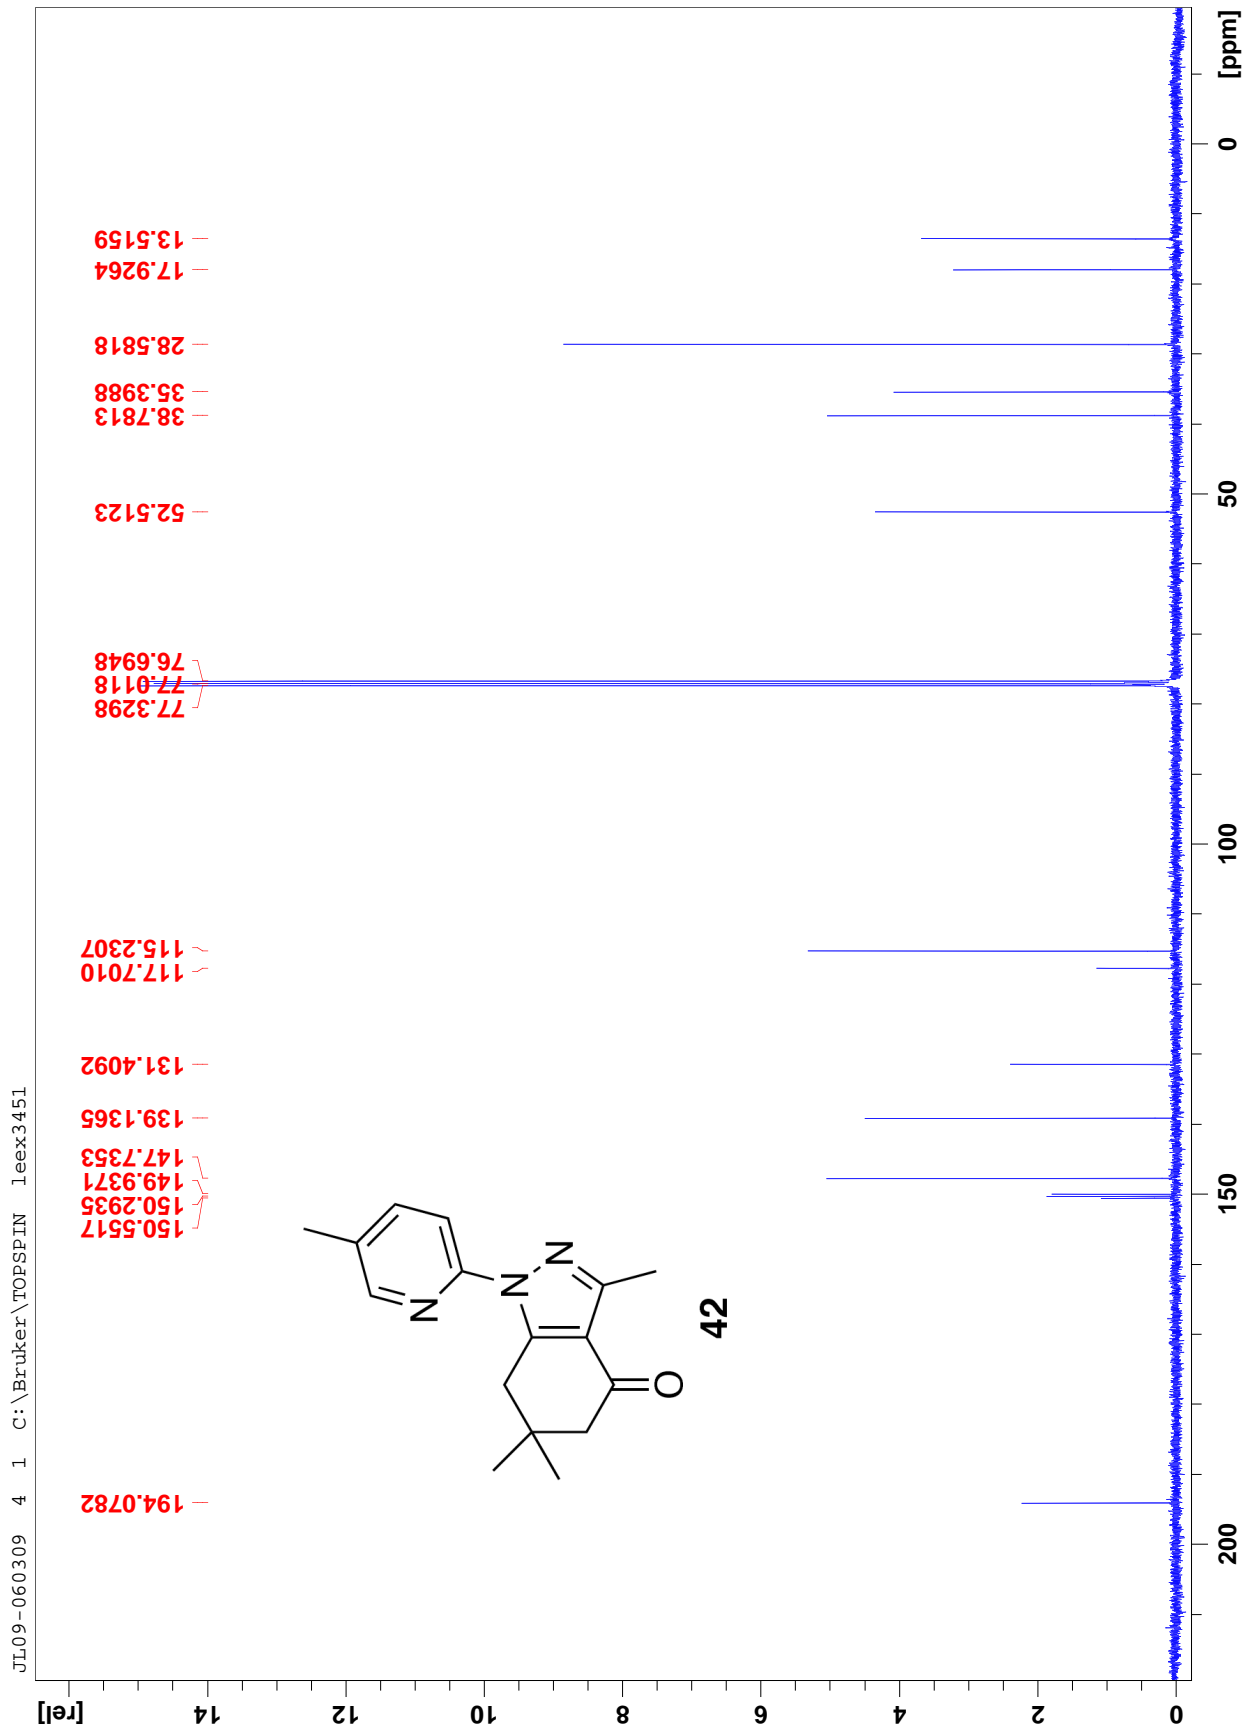

# 1H-NMR

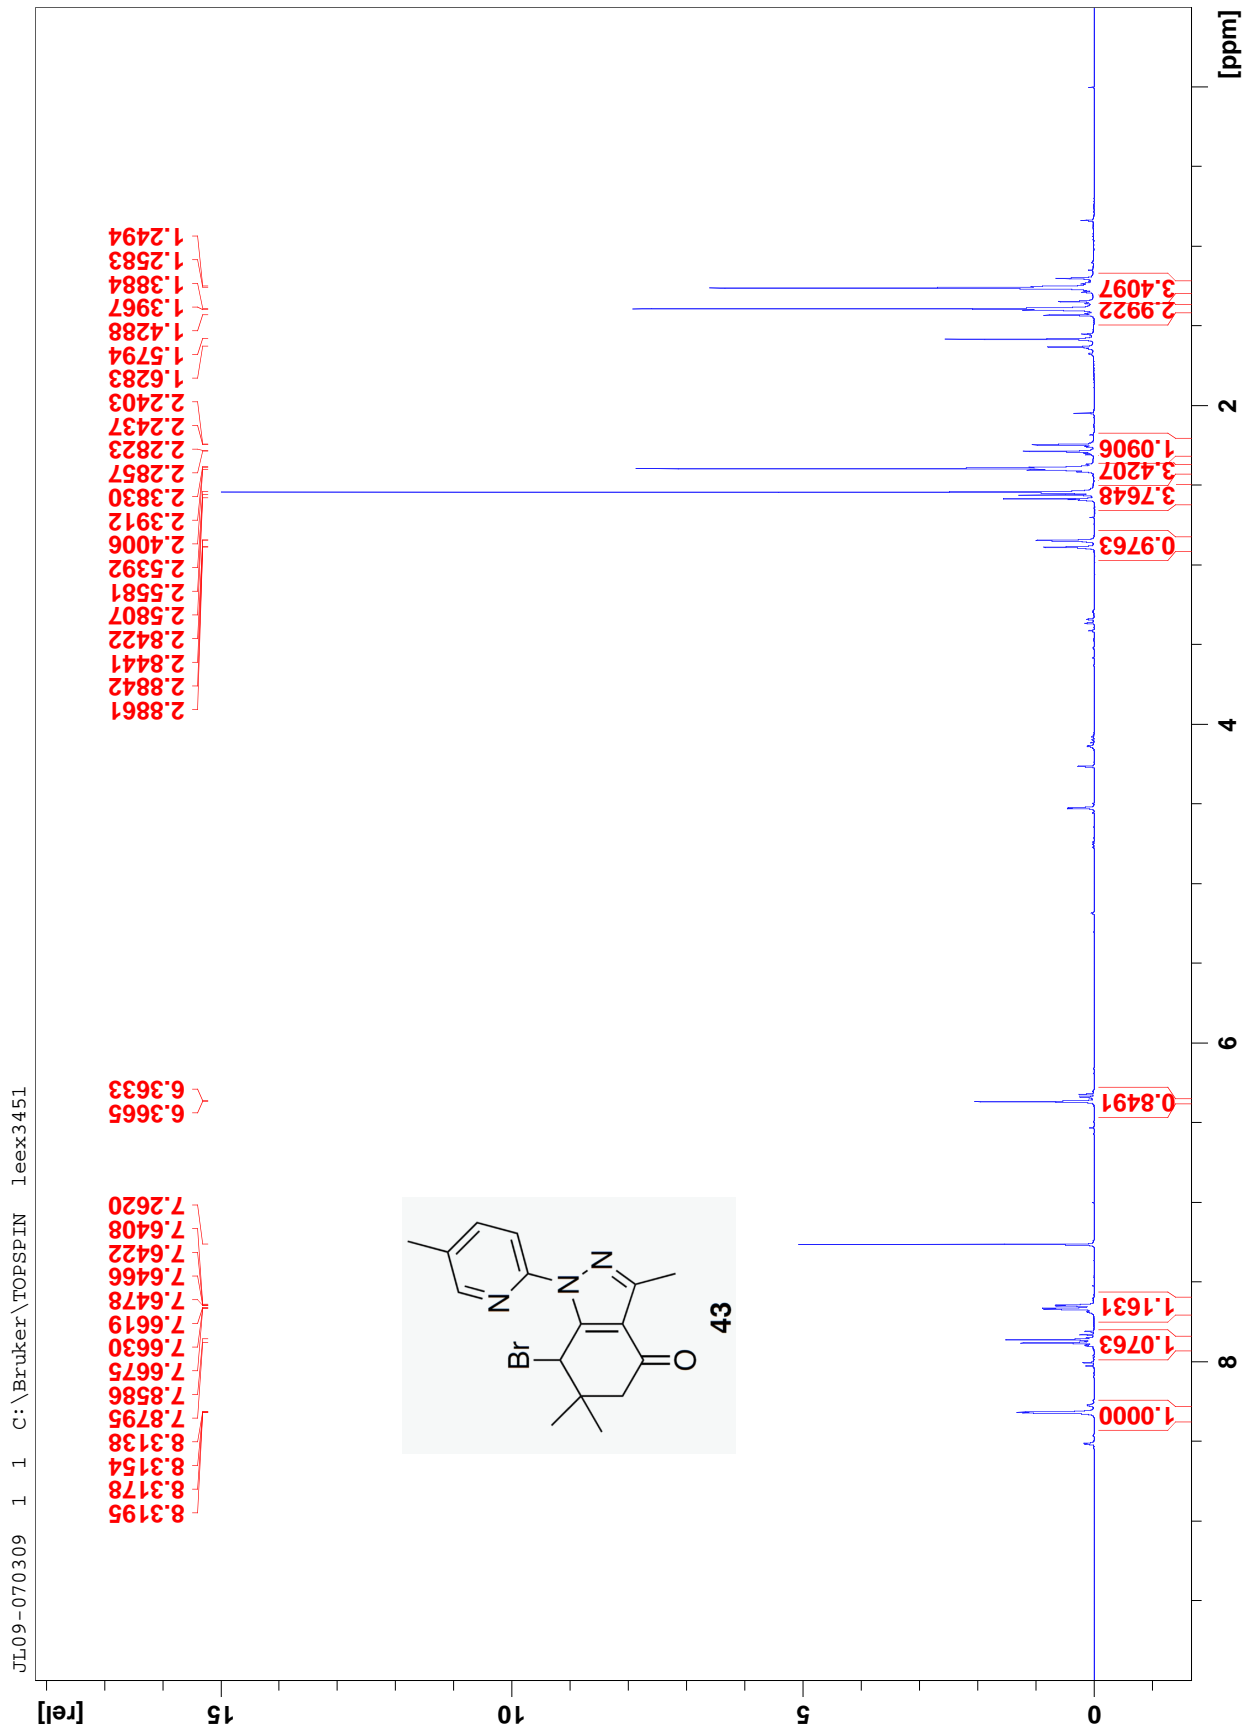

# 13C-NMR

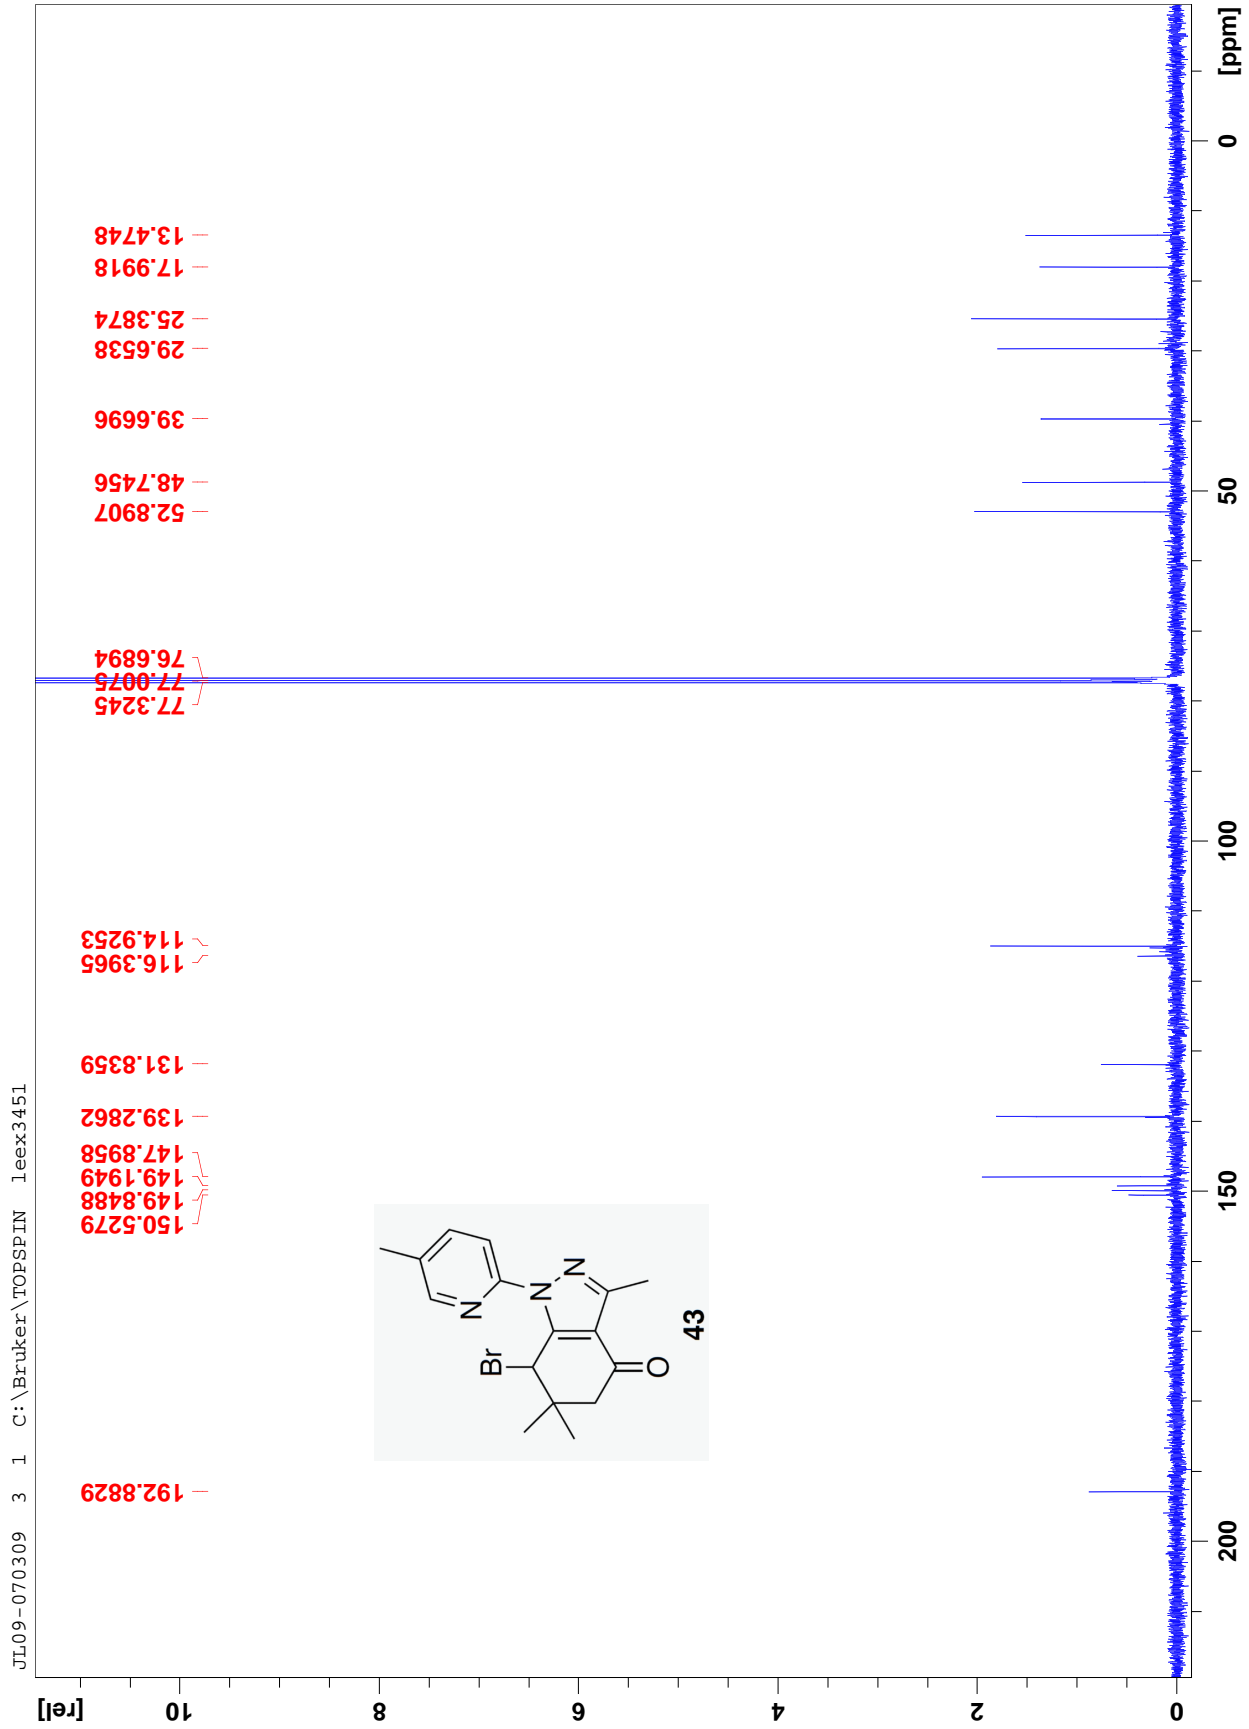

# 1H-NMR

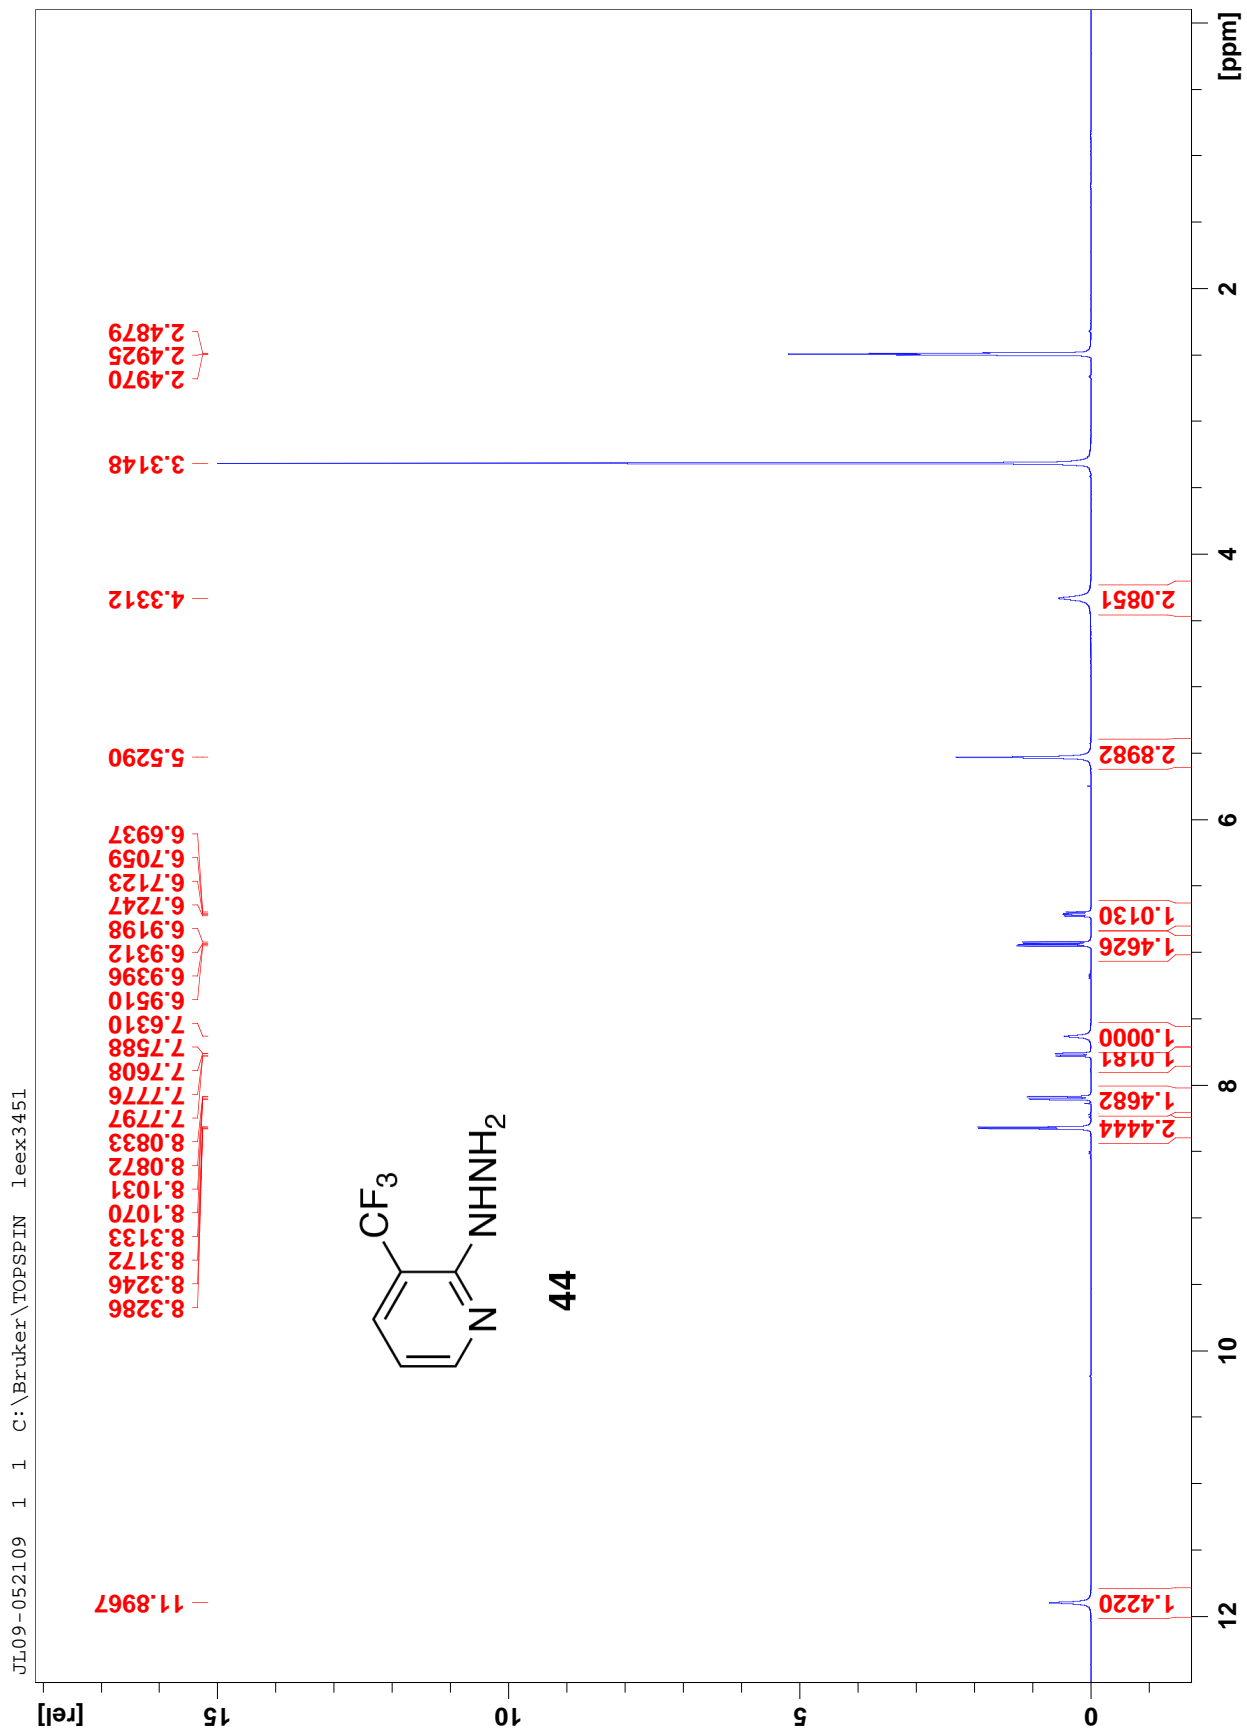



# 13C-NMR

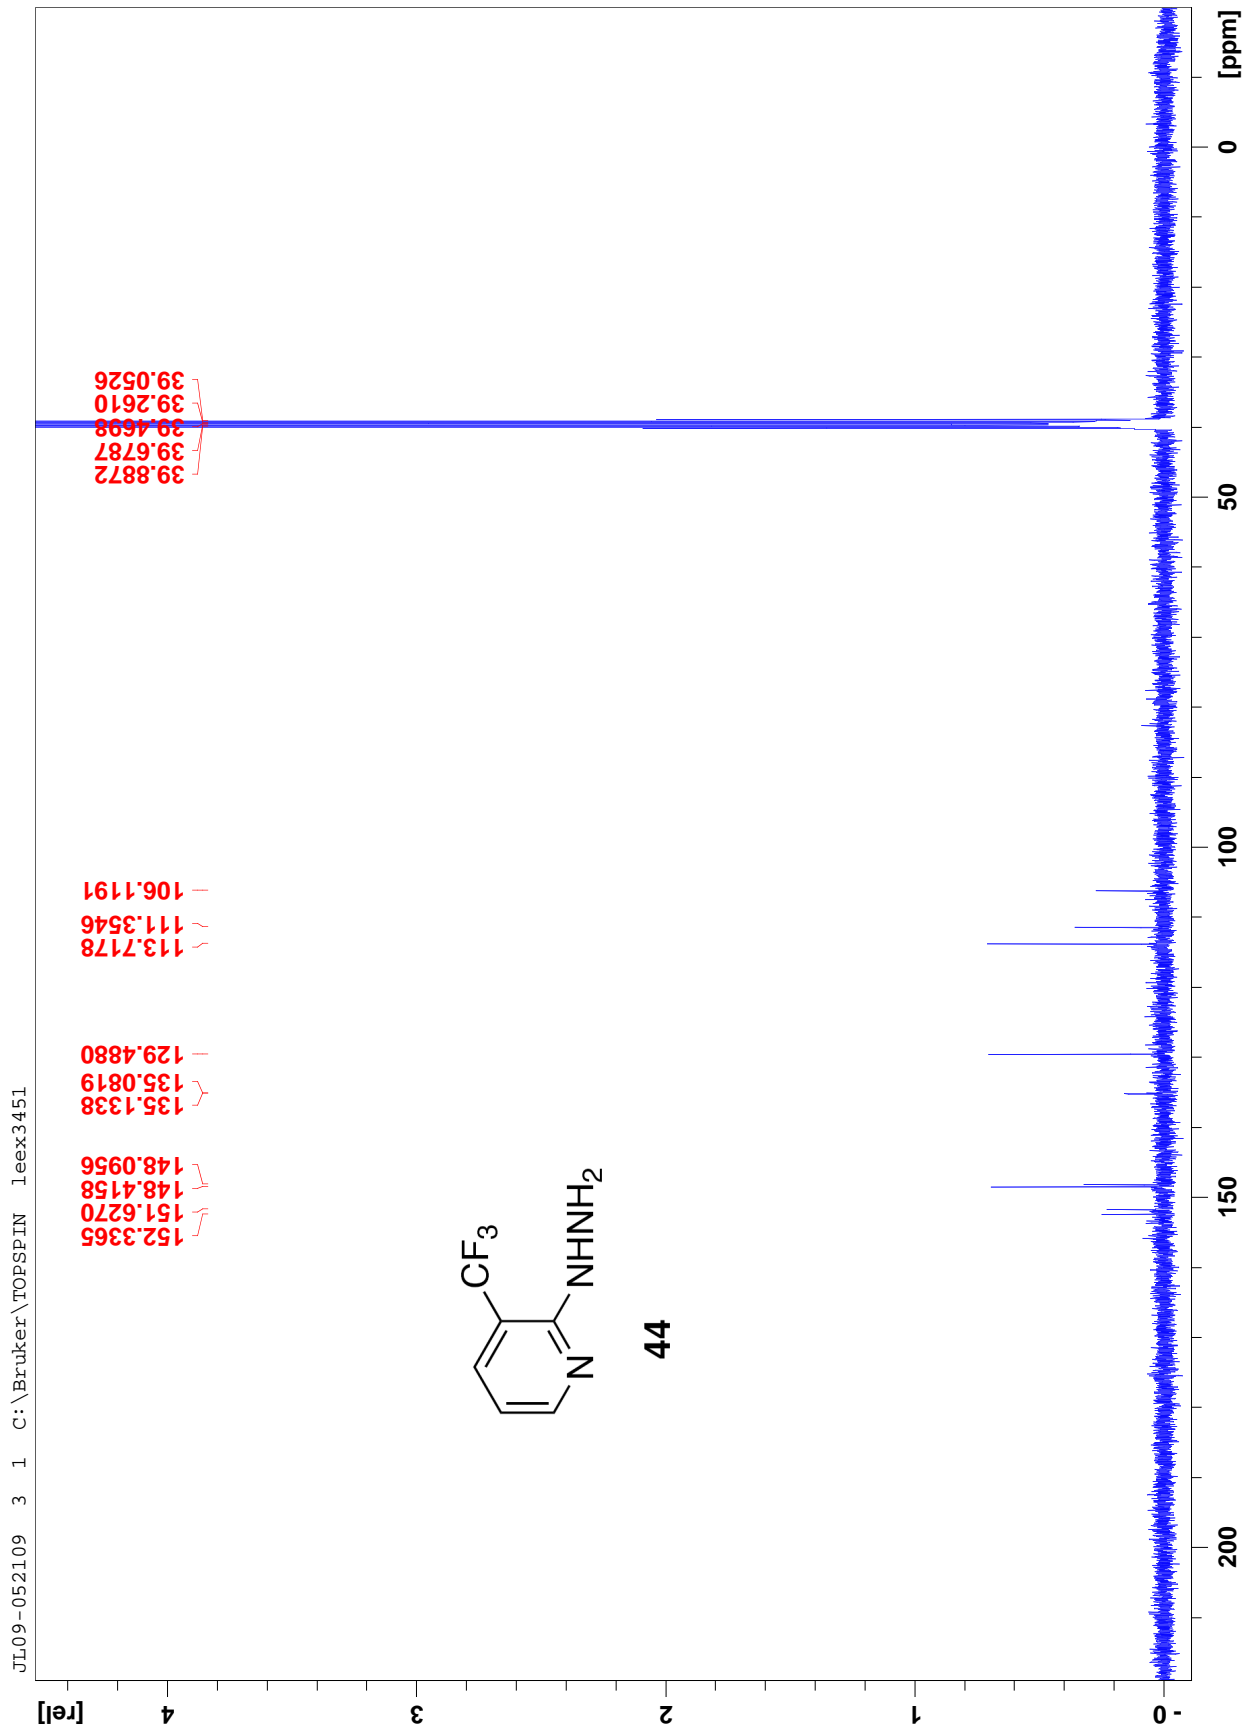

# 1H-NMR

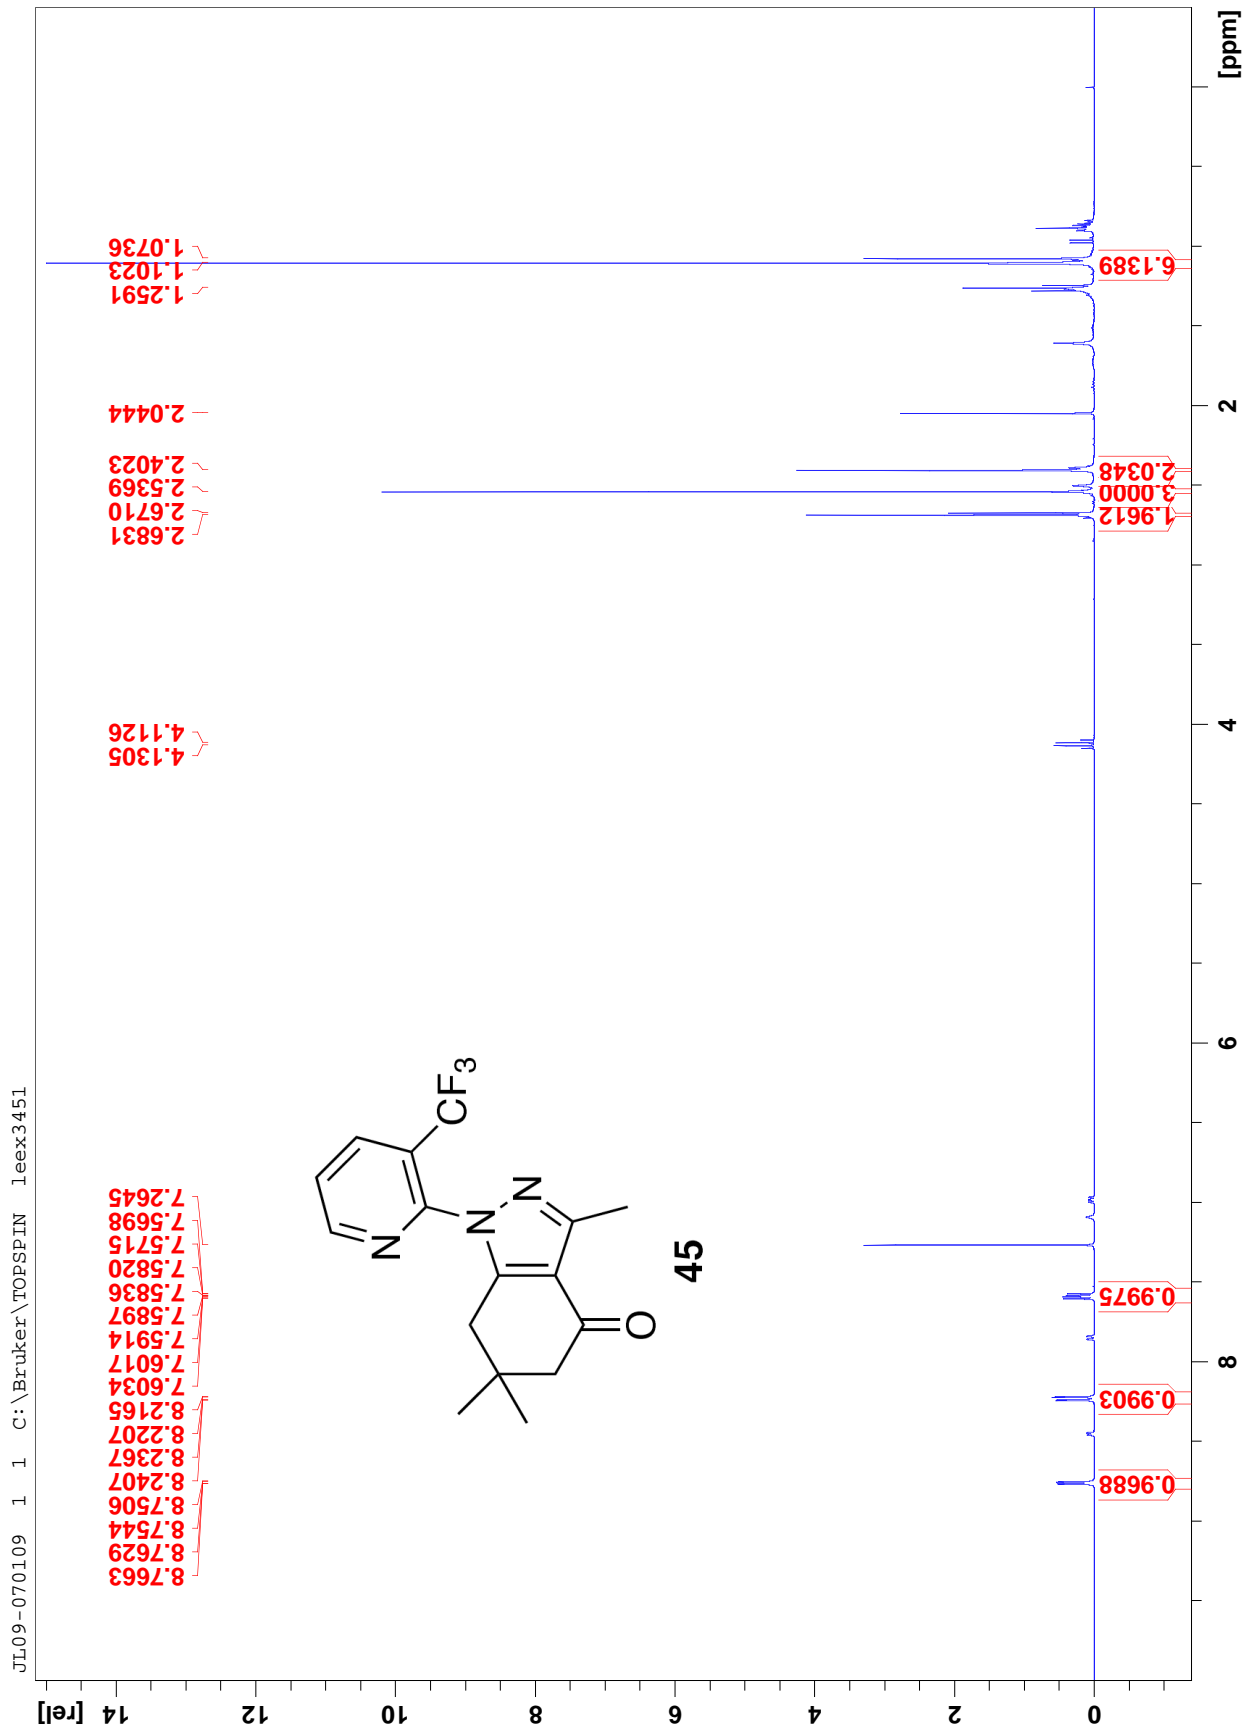

# 13C-NMR

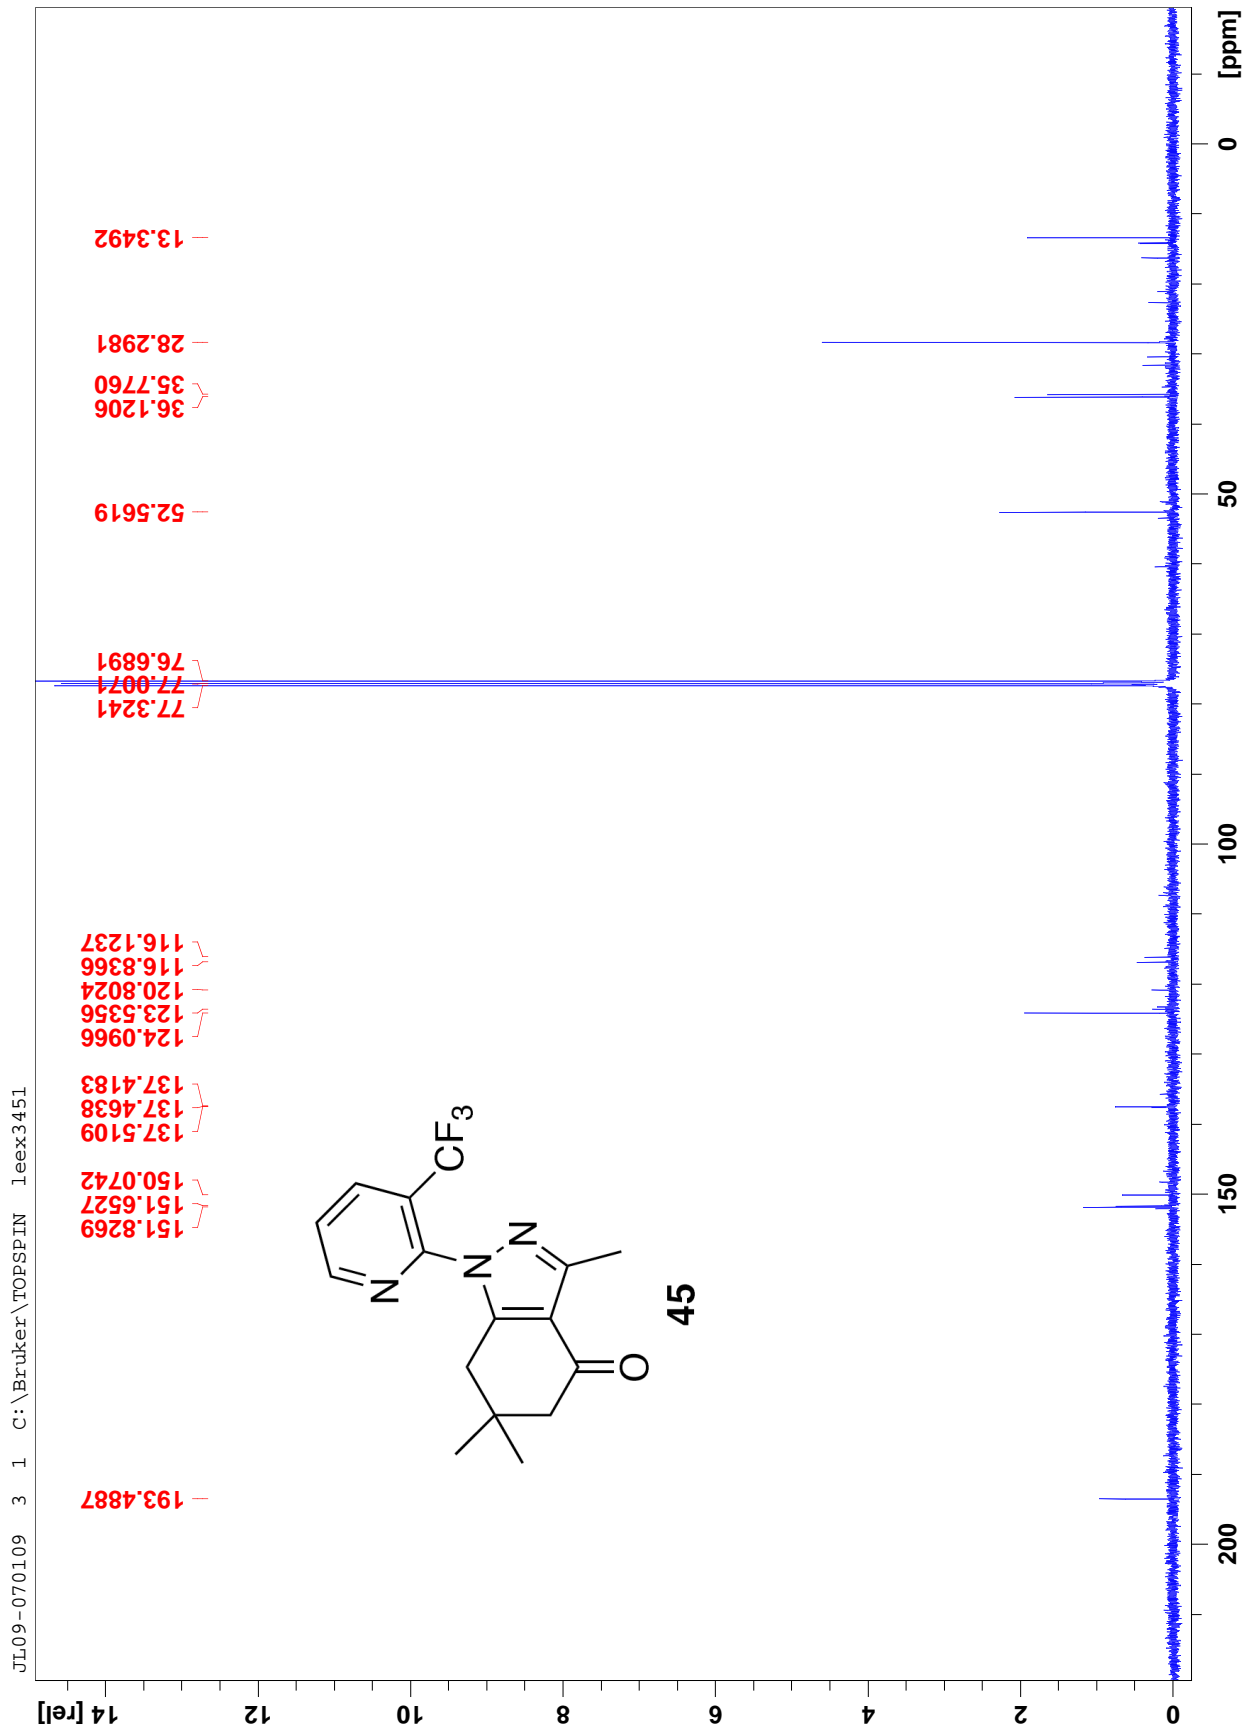

# 1H-NMR

JL09-072409A 1 1 C:\Bruker\TOPSPIN leex3451

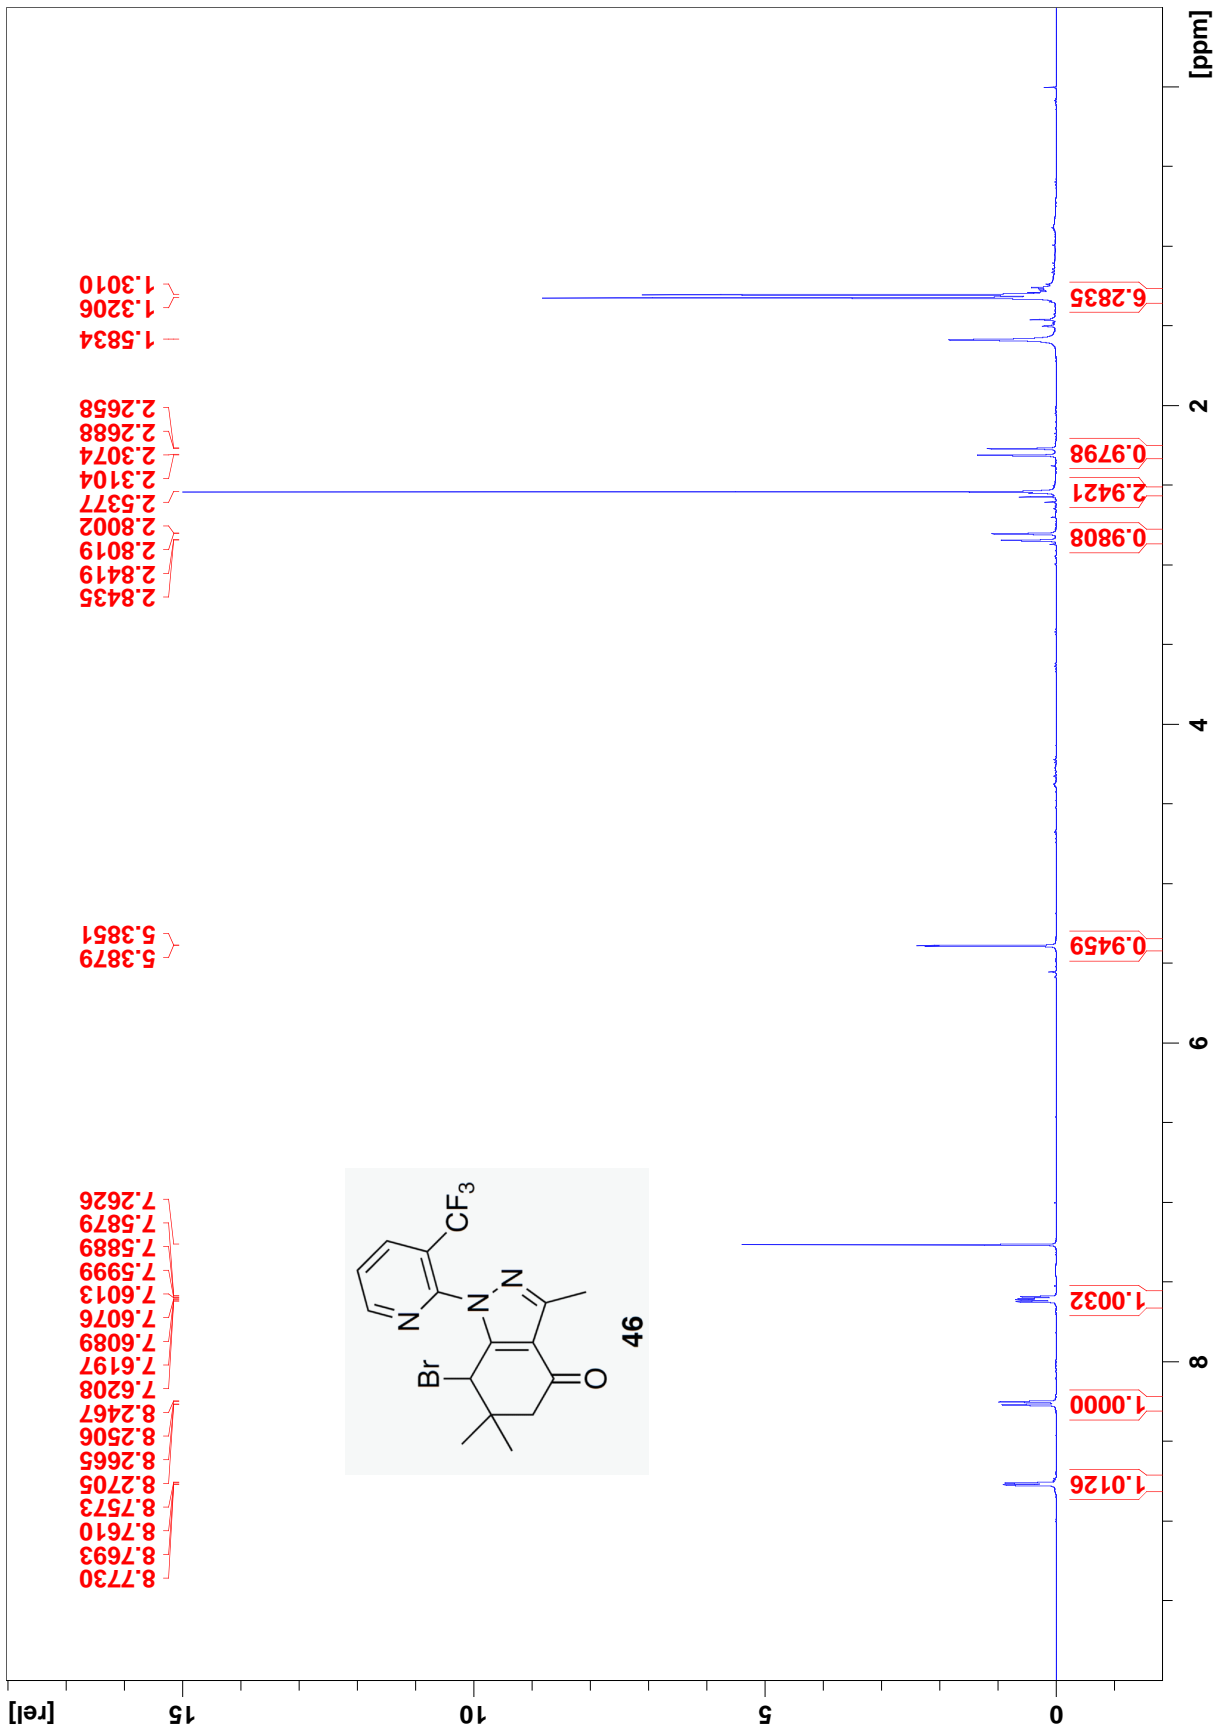

# 13C-NMR

JL09-072409A 4 1 C:\Bruker\TOPSPIN leex3451

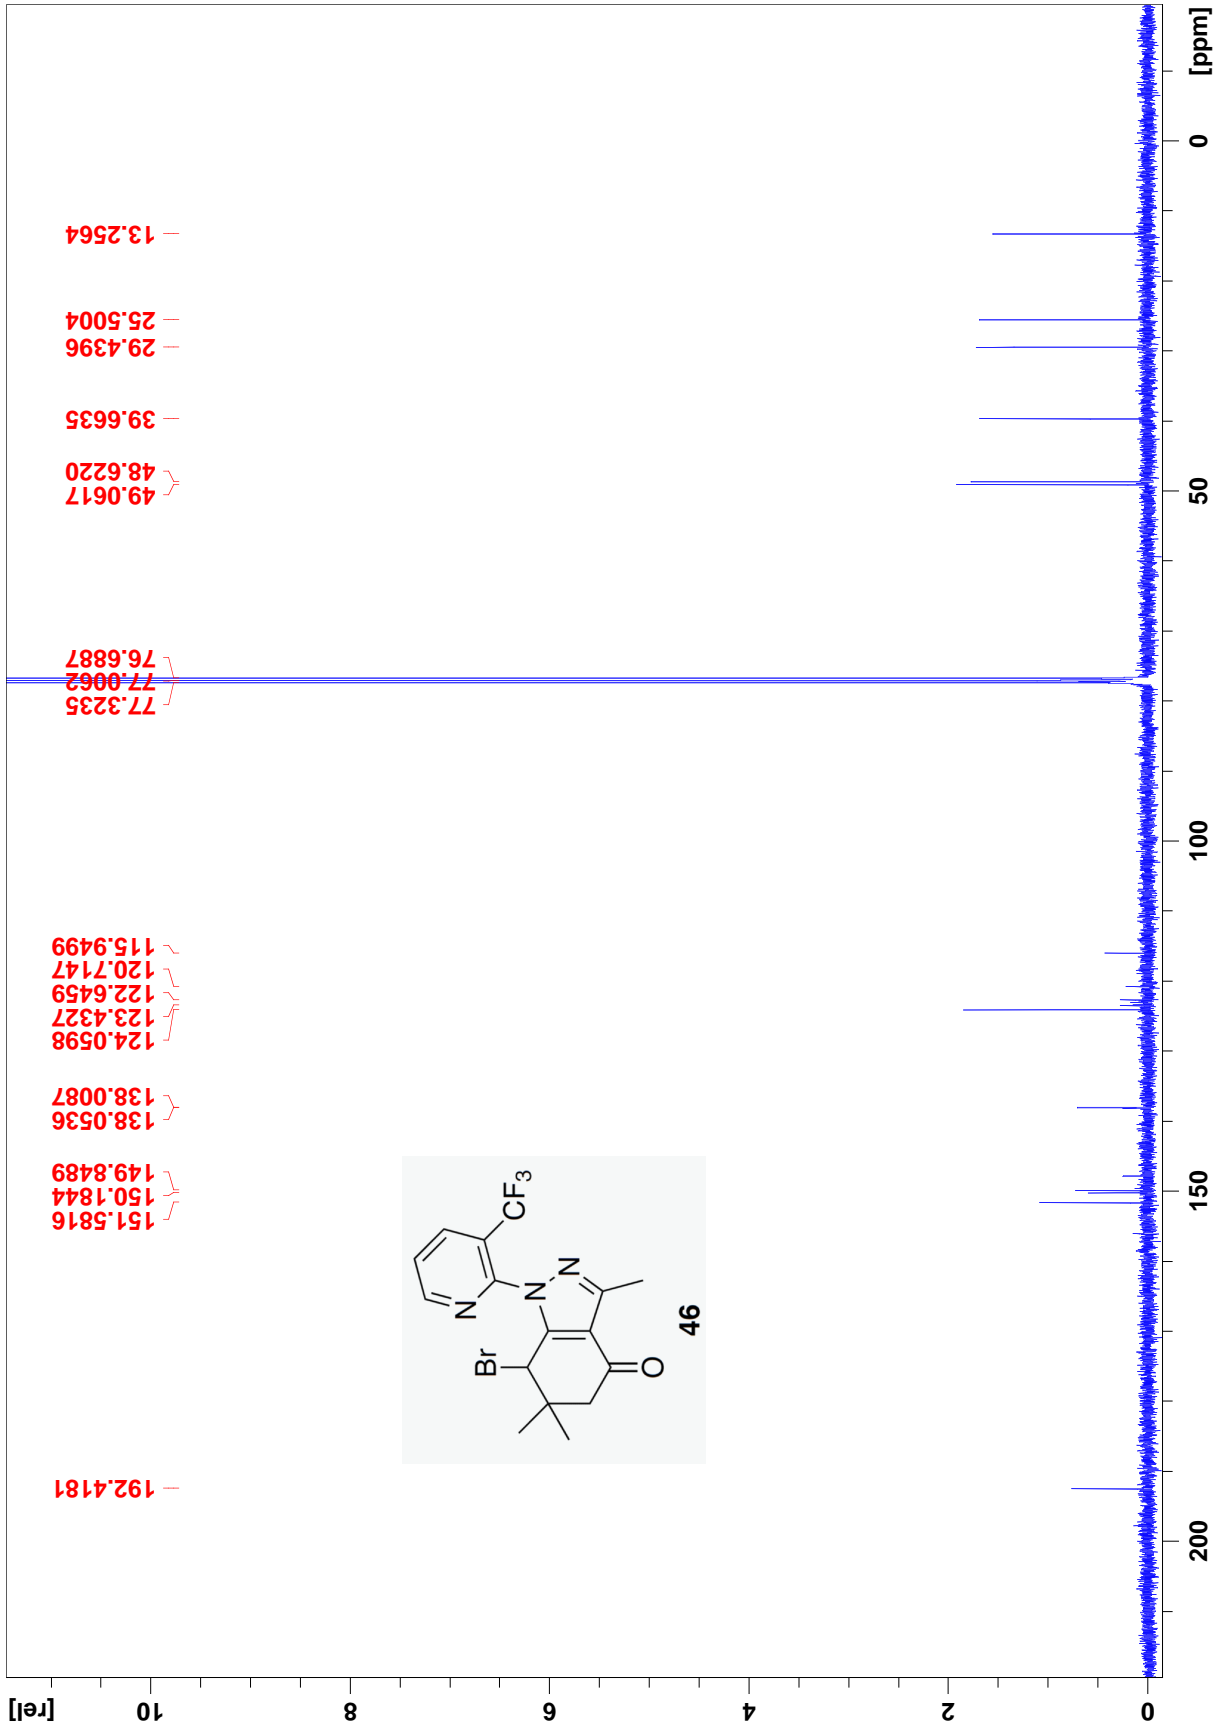

# 1H-NMR

JL09-072409B 1 1 C:\Bruker\TOPSPIN leex3451

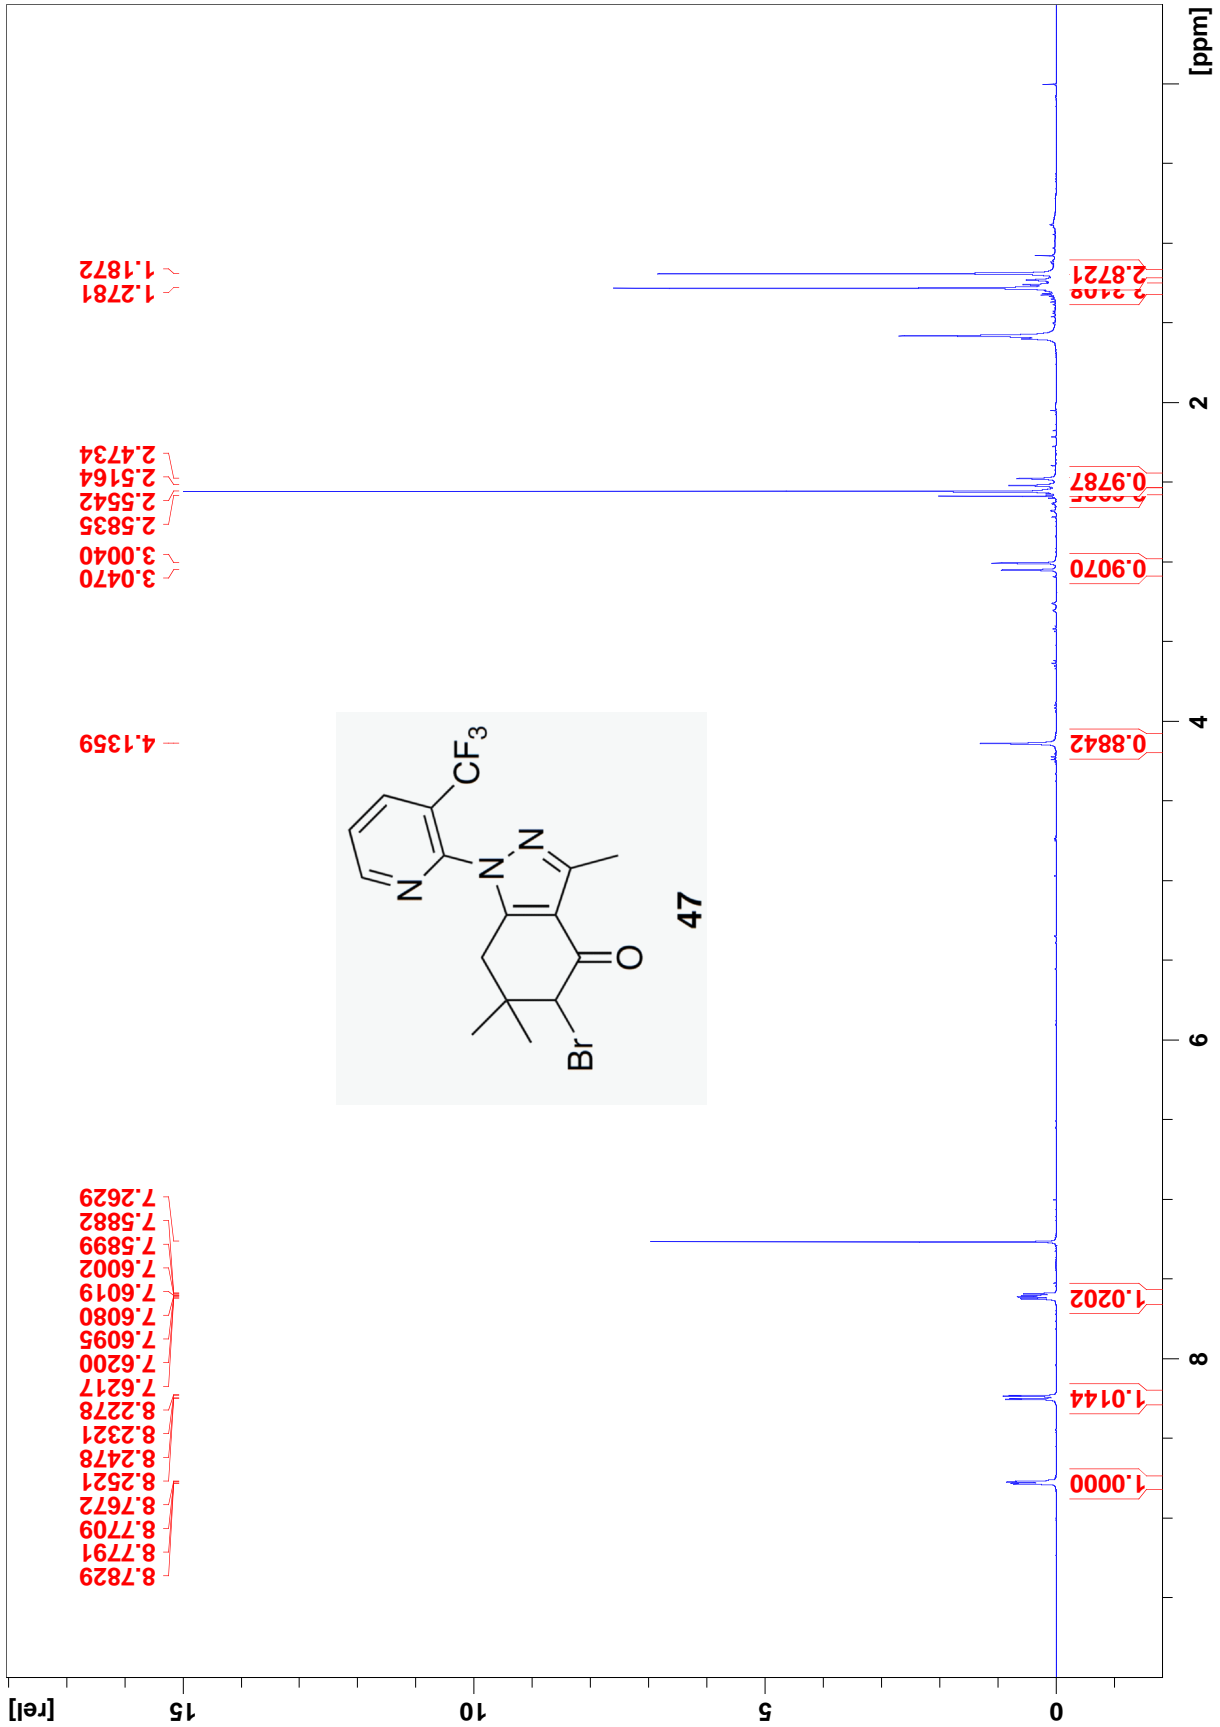

# 13C-NMR

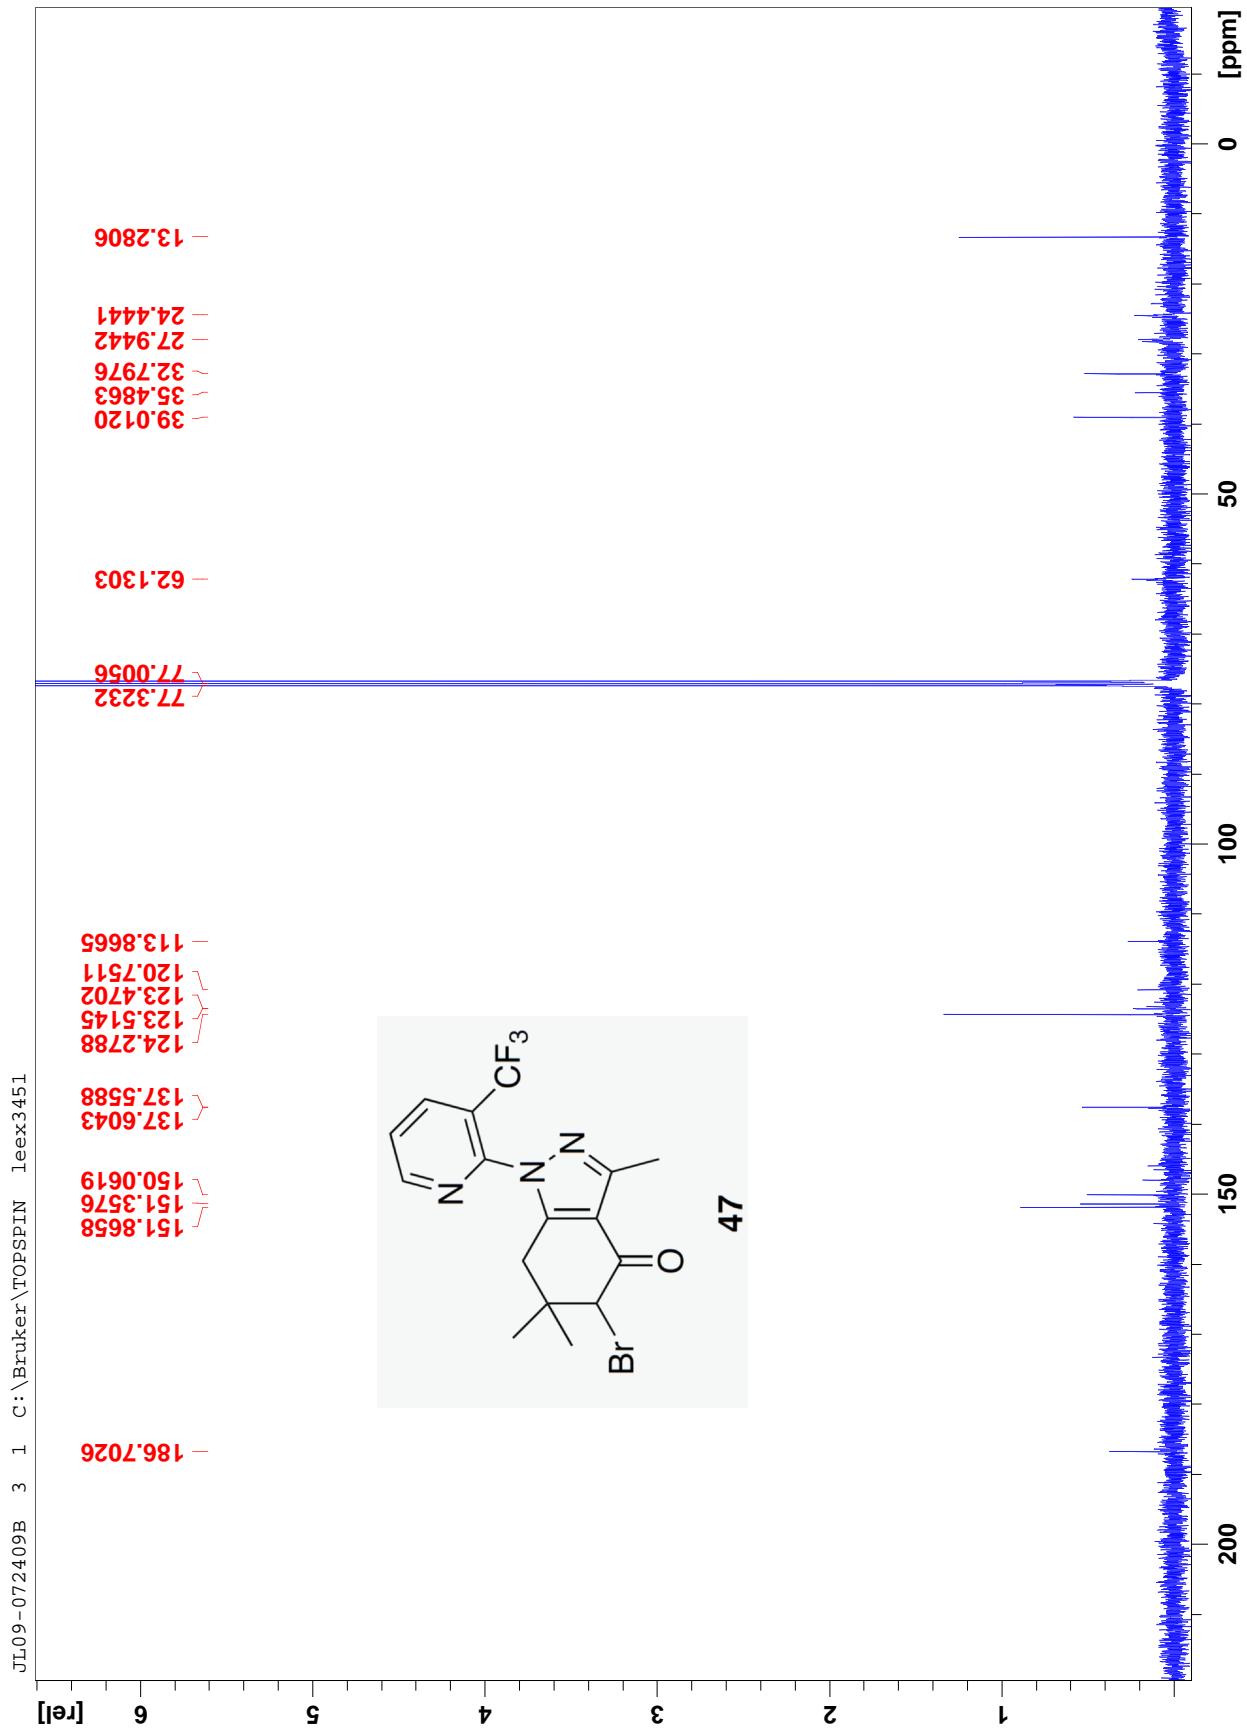

# 1H-NMR

JL09-070809 1 1 C:\Bruker\TOPSPIN leex3451

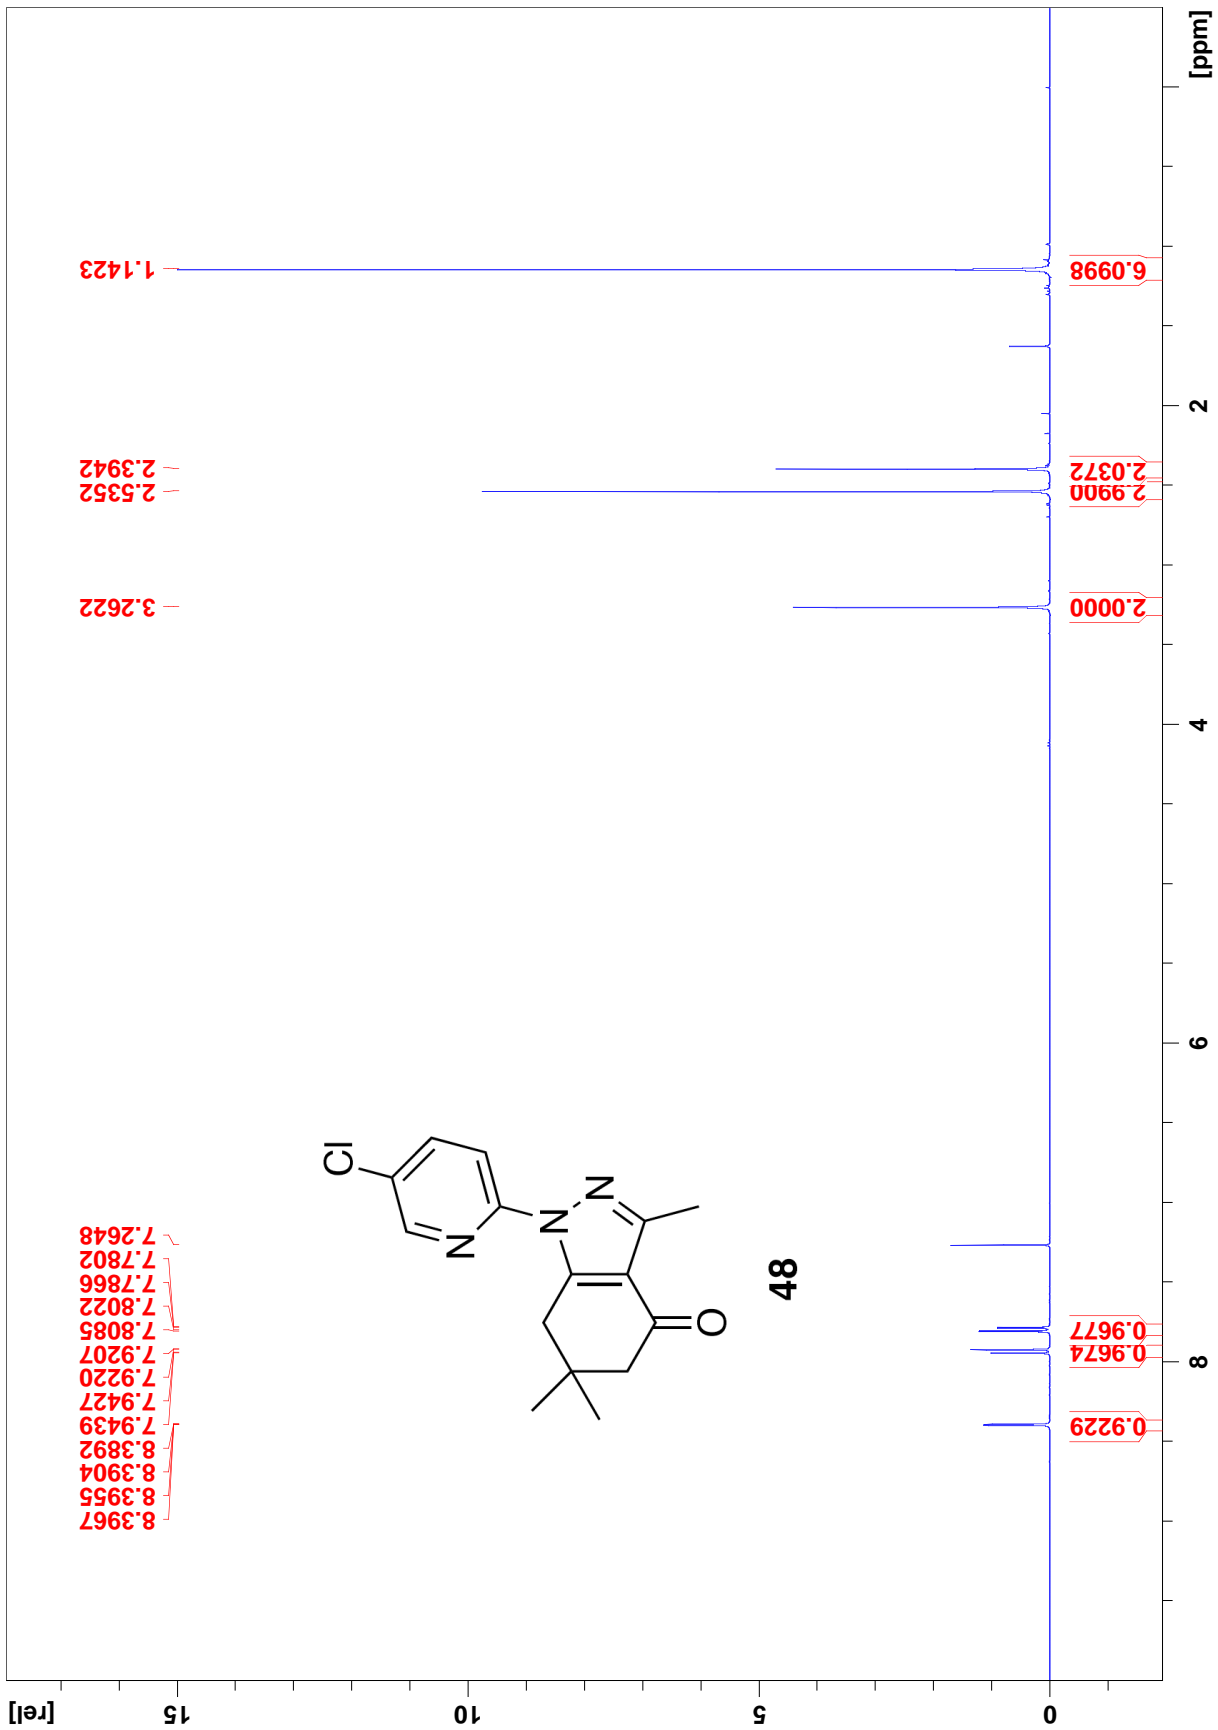



# 13C-NMR

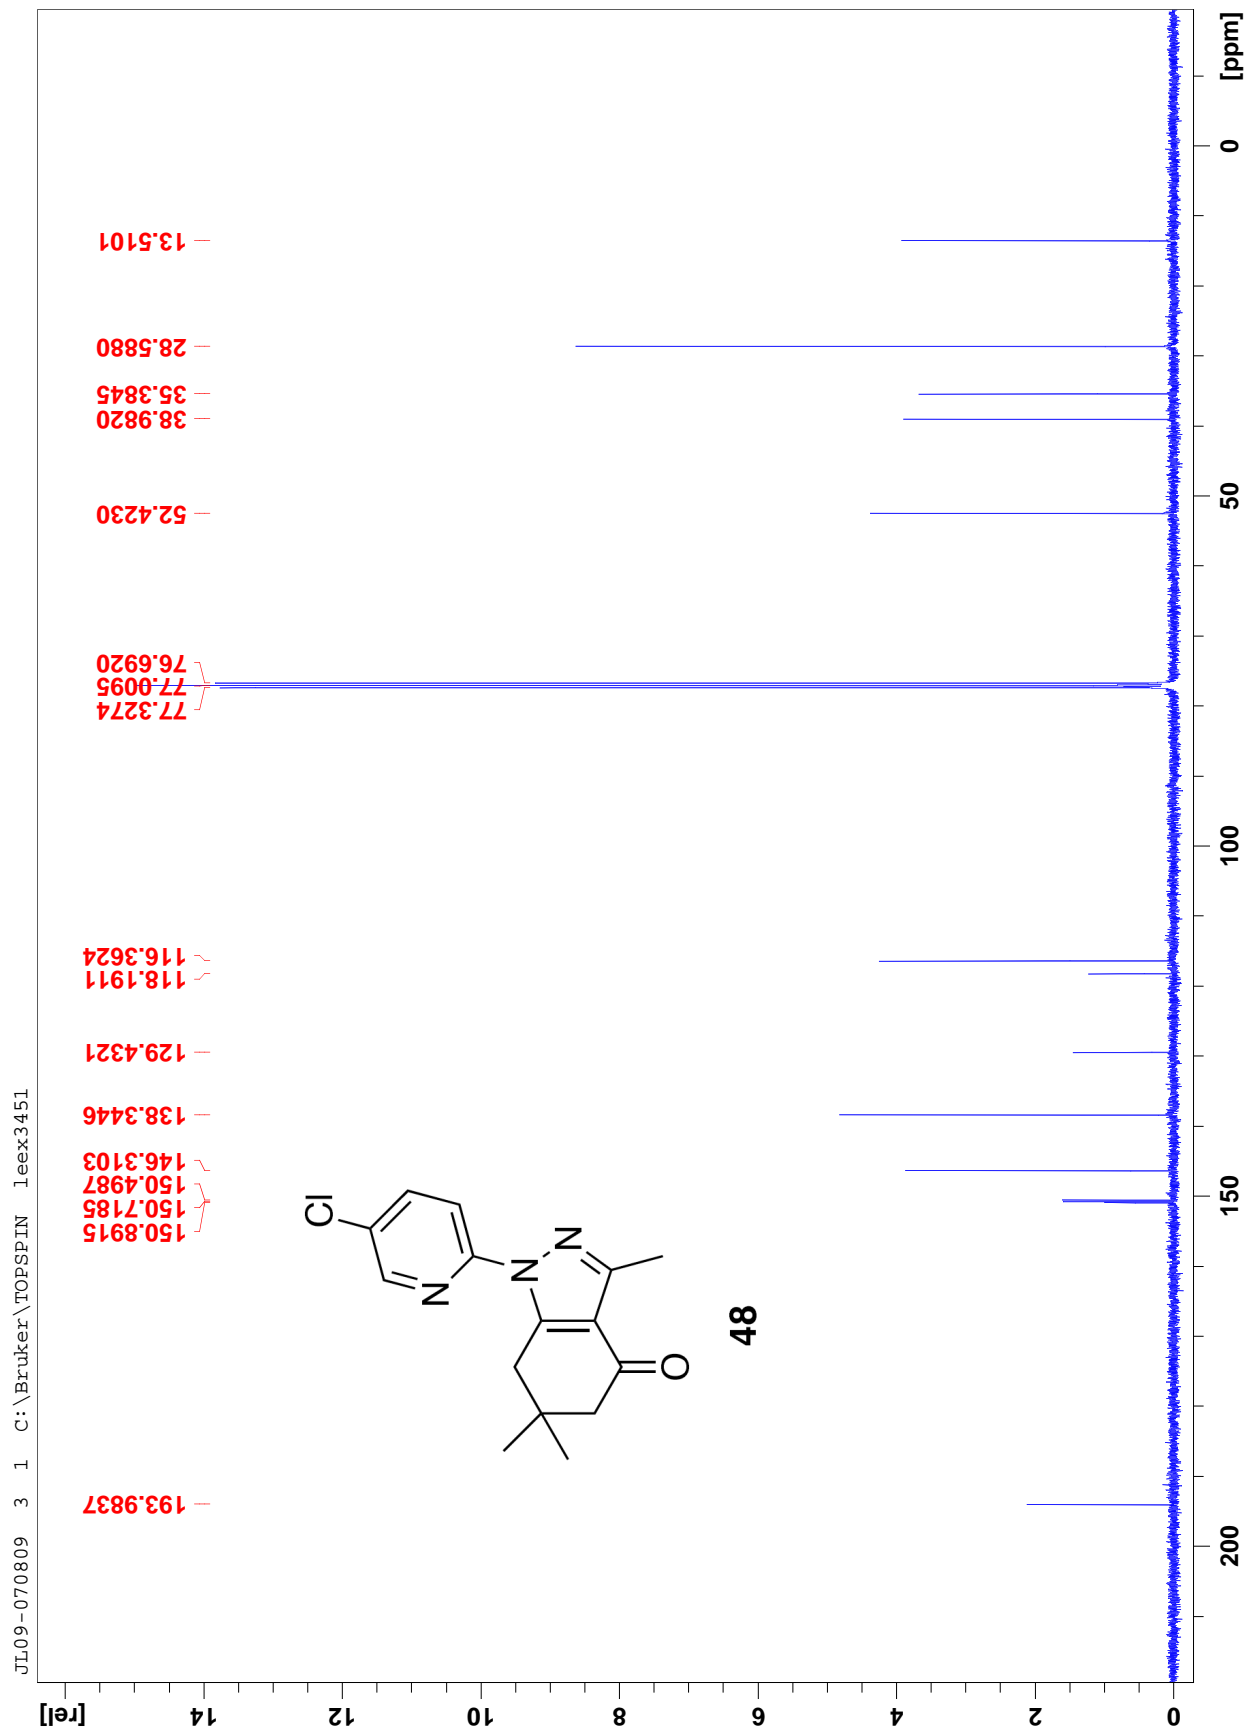

# 1H-NMR

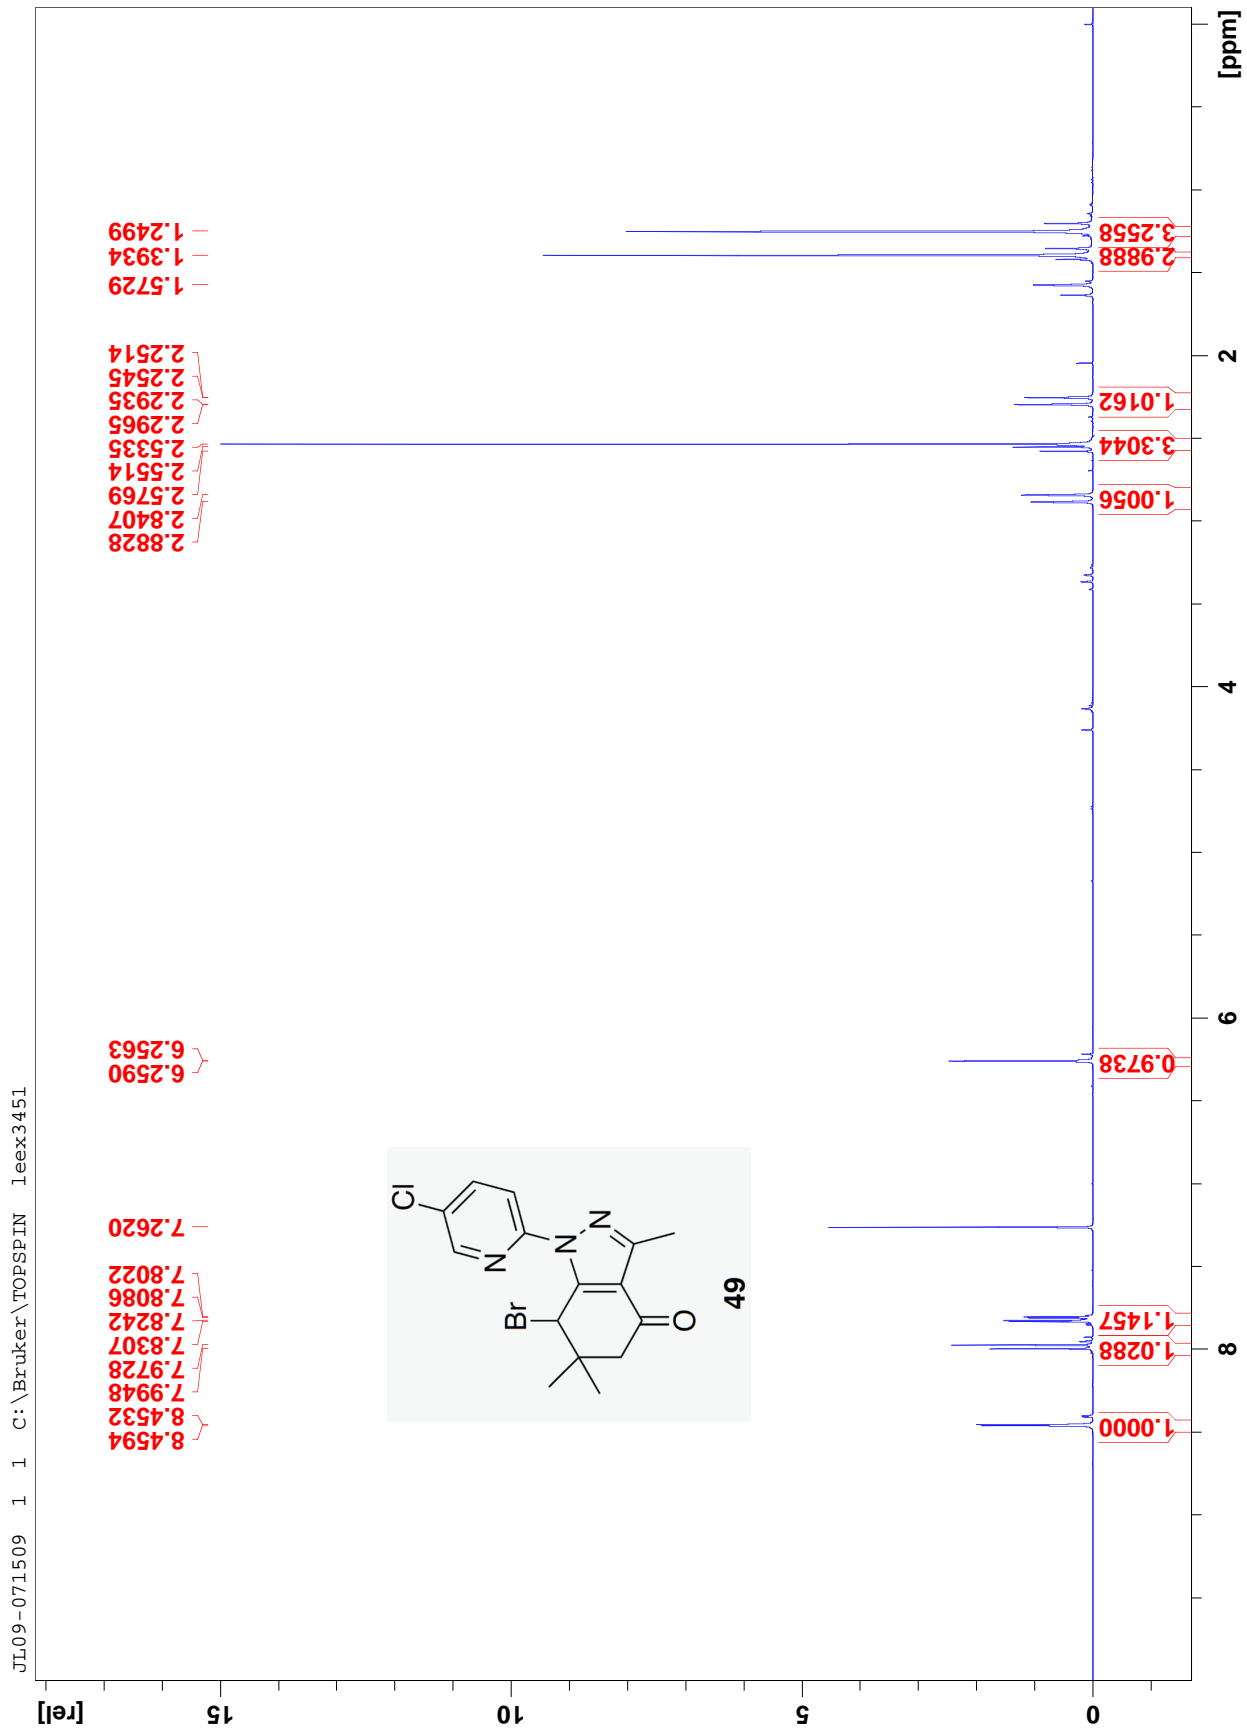

# 13C-NMR

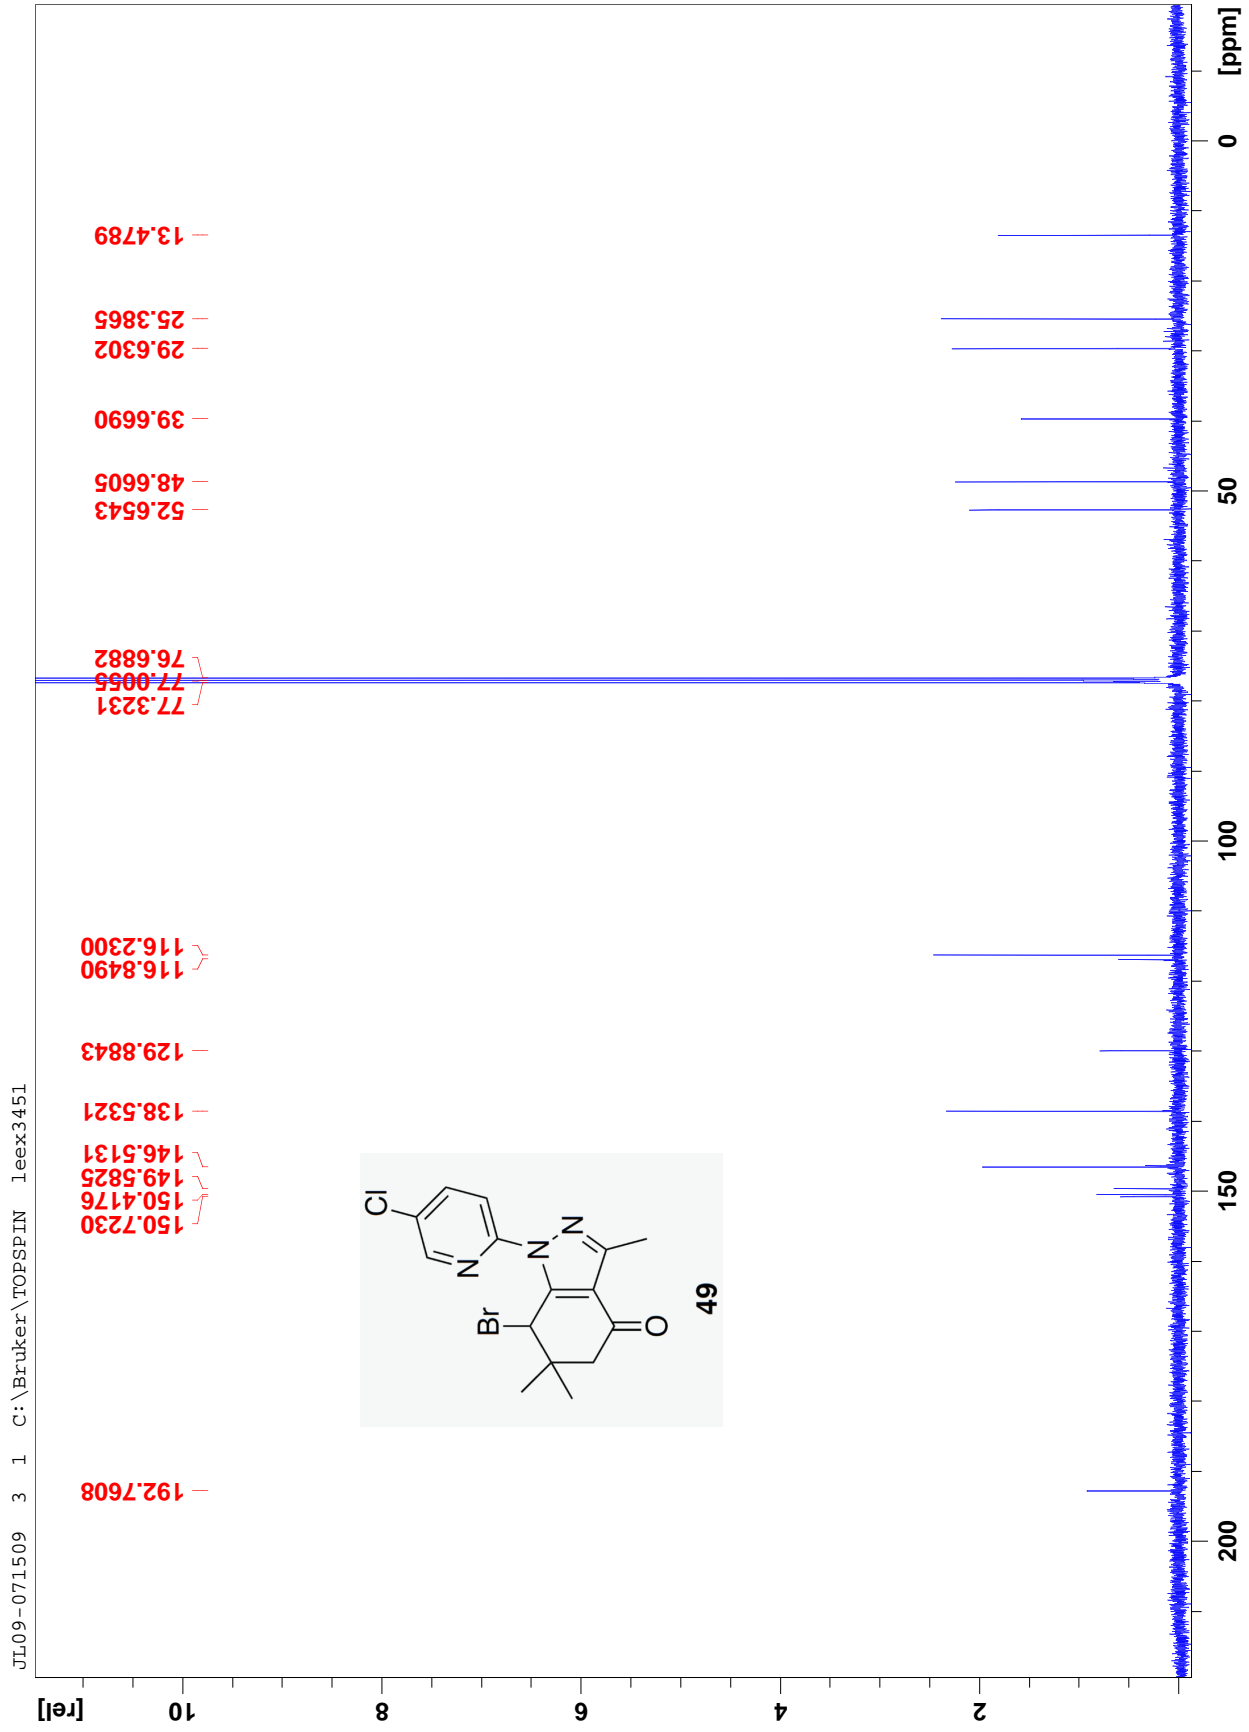

# 1H-NMR

JL09-070609 1 1 C:\Bruker\TOPSPIN leex3451

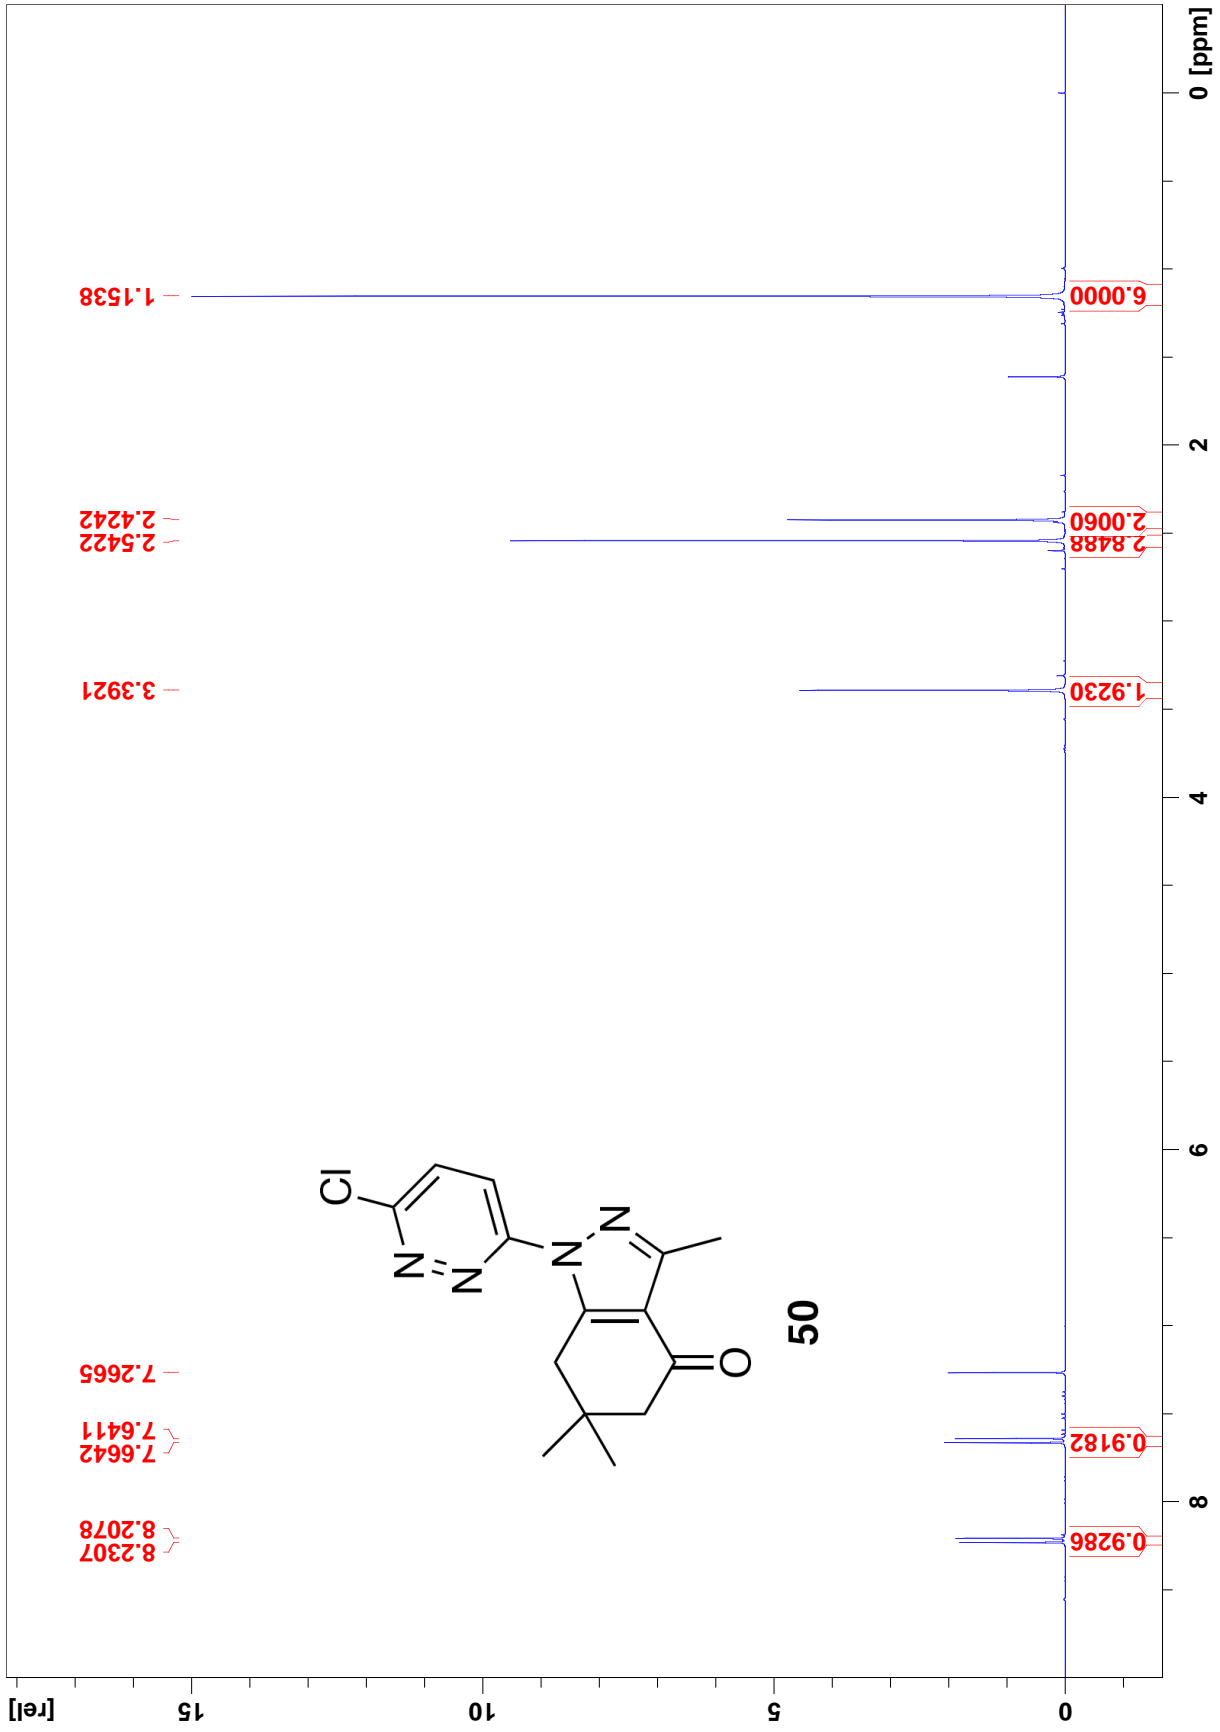

# 13C-NMR

JL09-070609 3 1 C:\Bruker\TOPSPIN leex3451

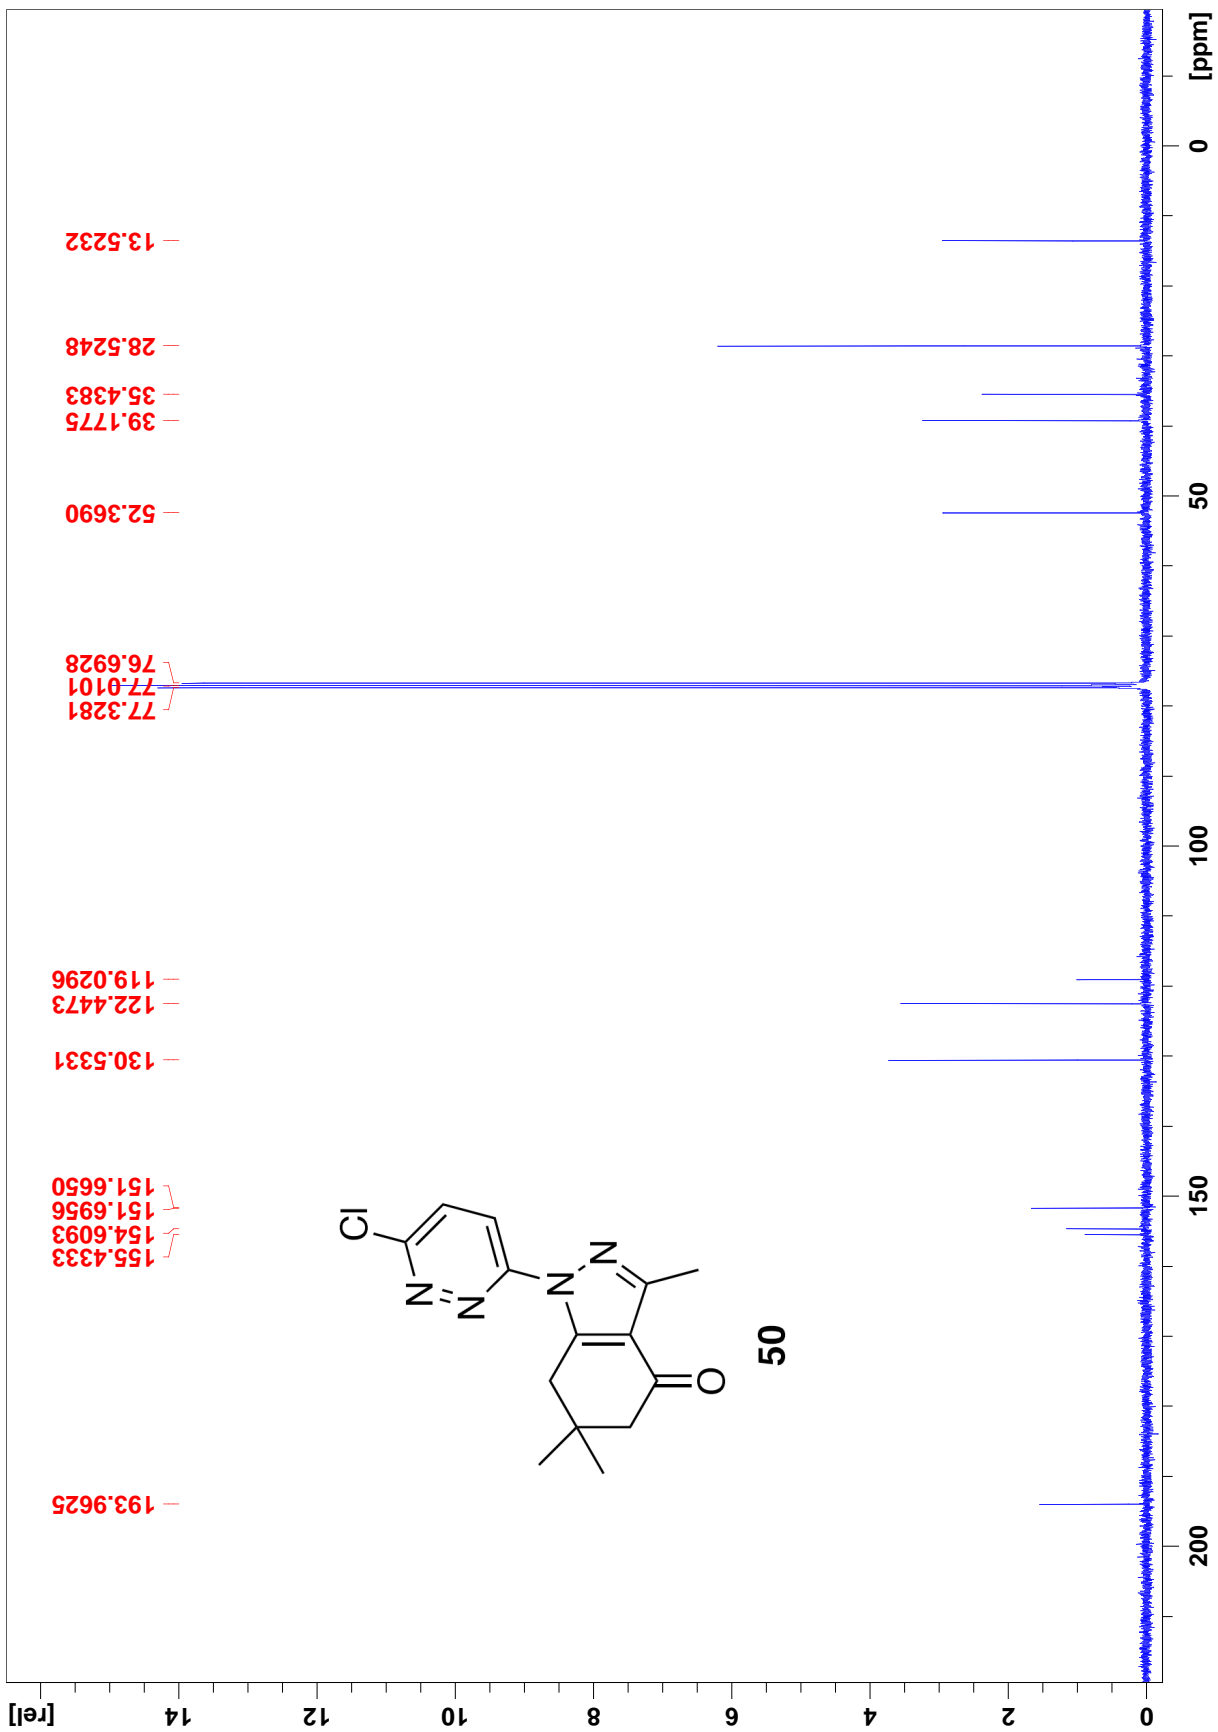

# 1H-NMR

JL09-071609-S 1 1 C:\Bruker\TOPSPIN leex3451

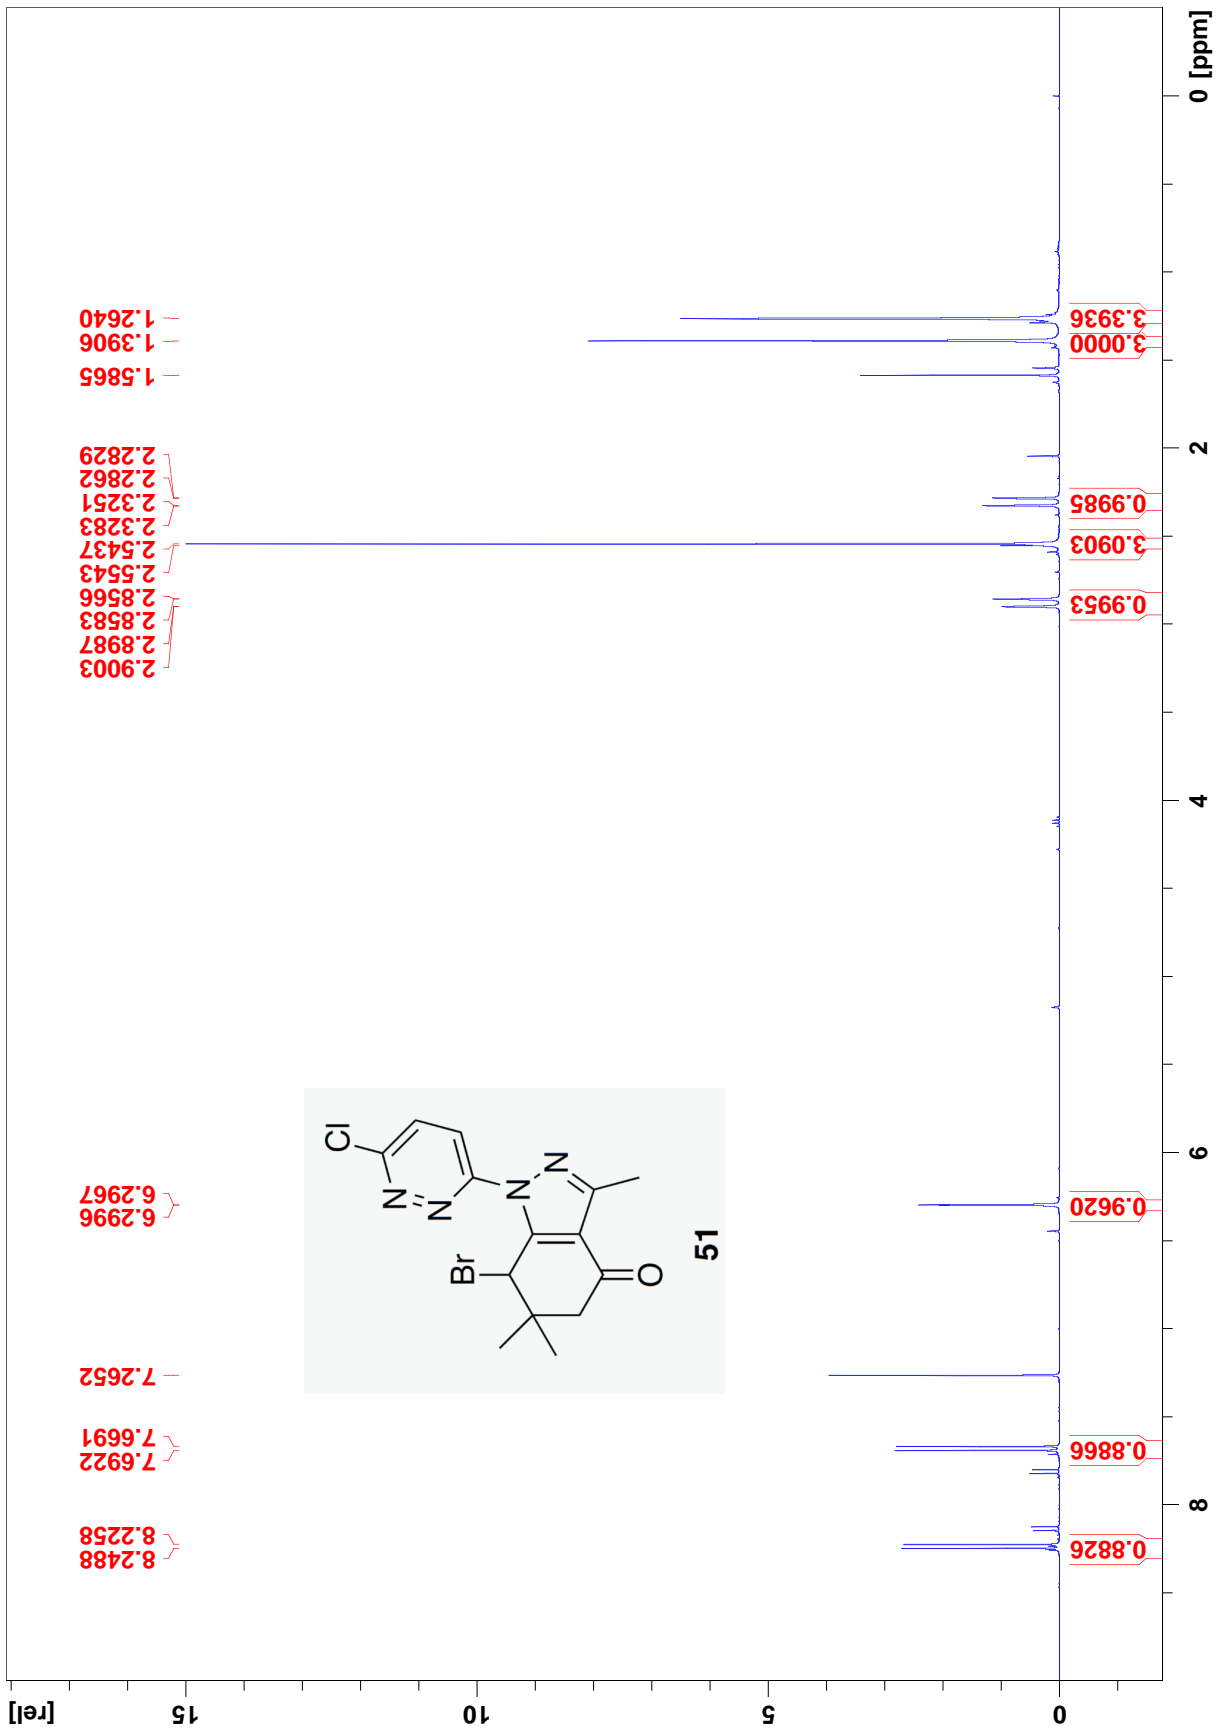

# 13C-NMR

JL09-071609-S 3 1 C:\Bruker\TOPSPIN leex3451

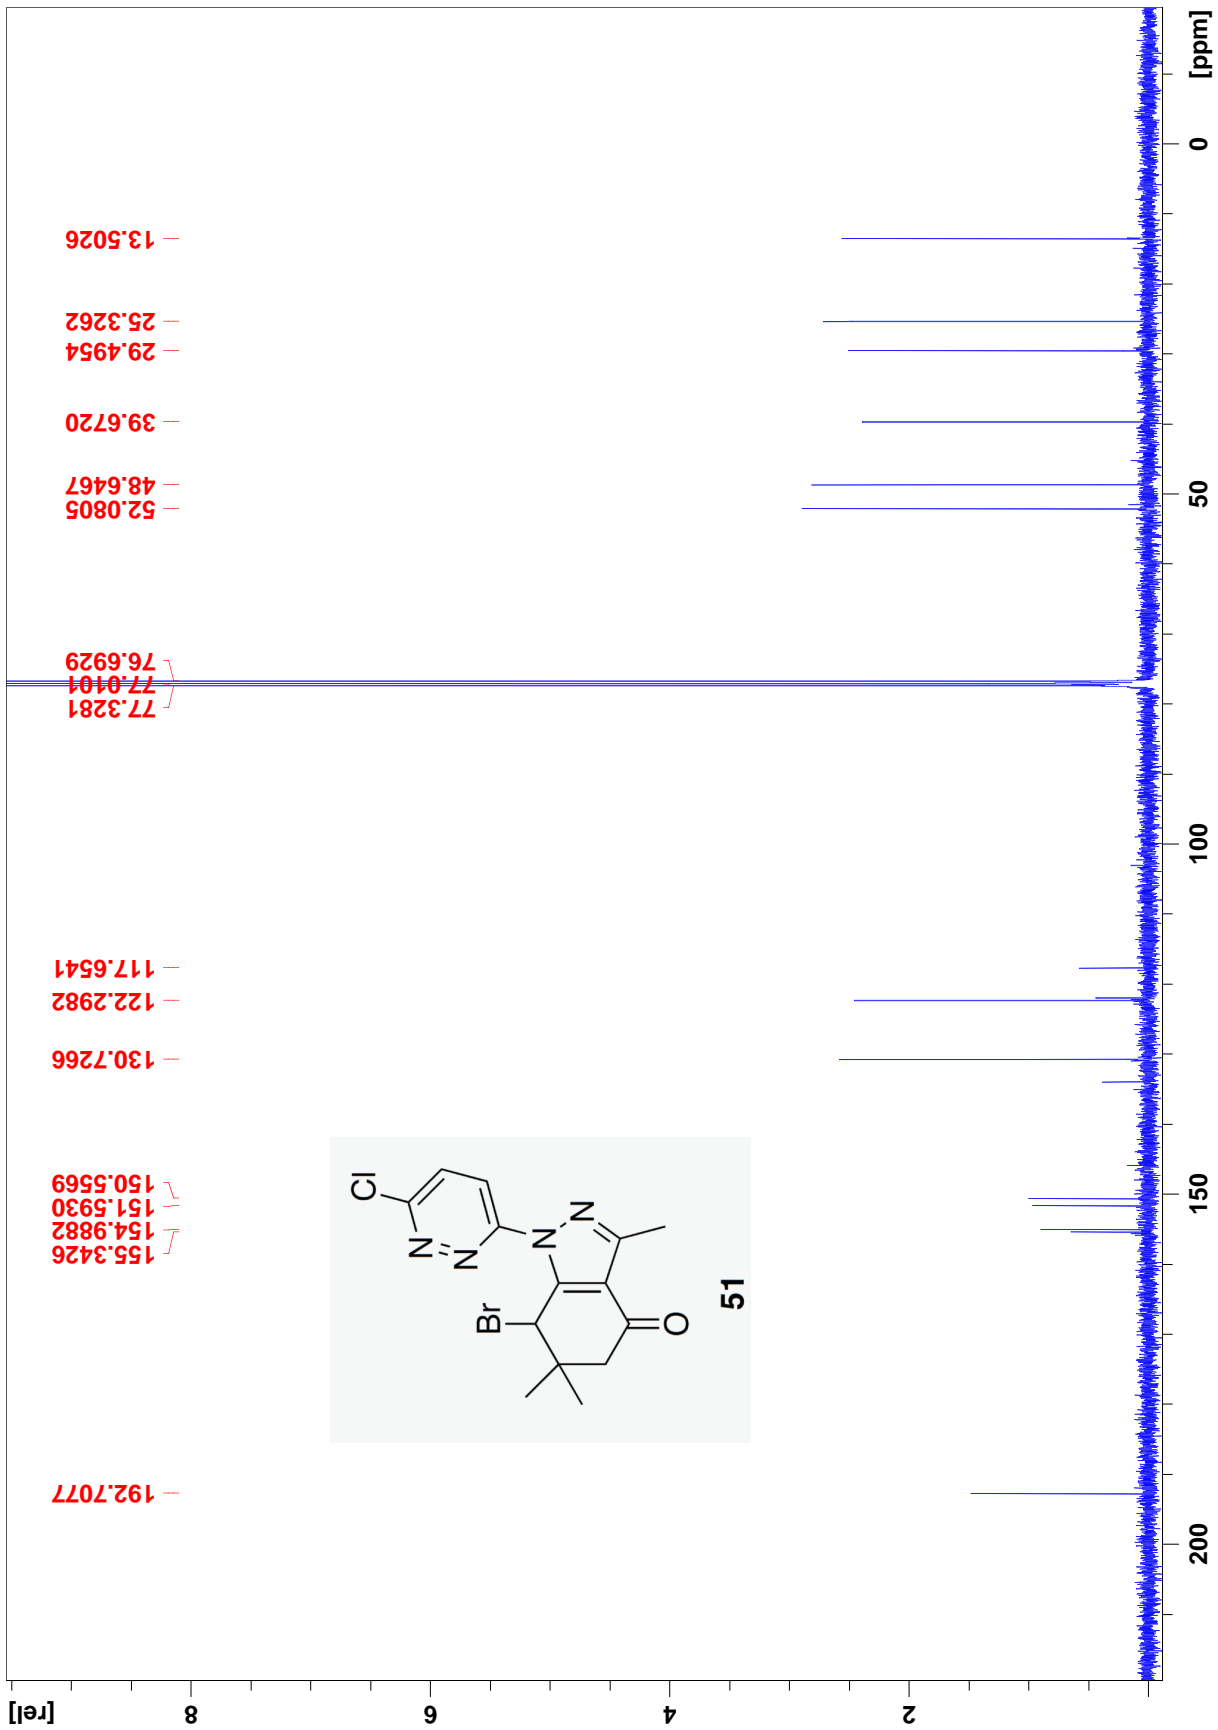

# 1H-NMR

JL09-071309 1 1 C:\Bruker\TOPSPIN leex3451

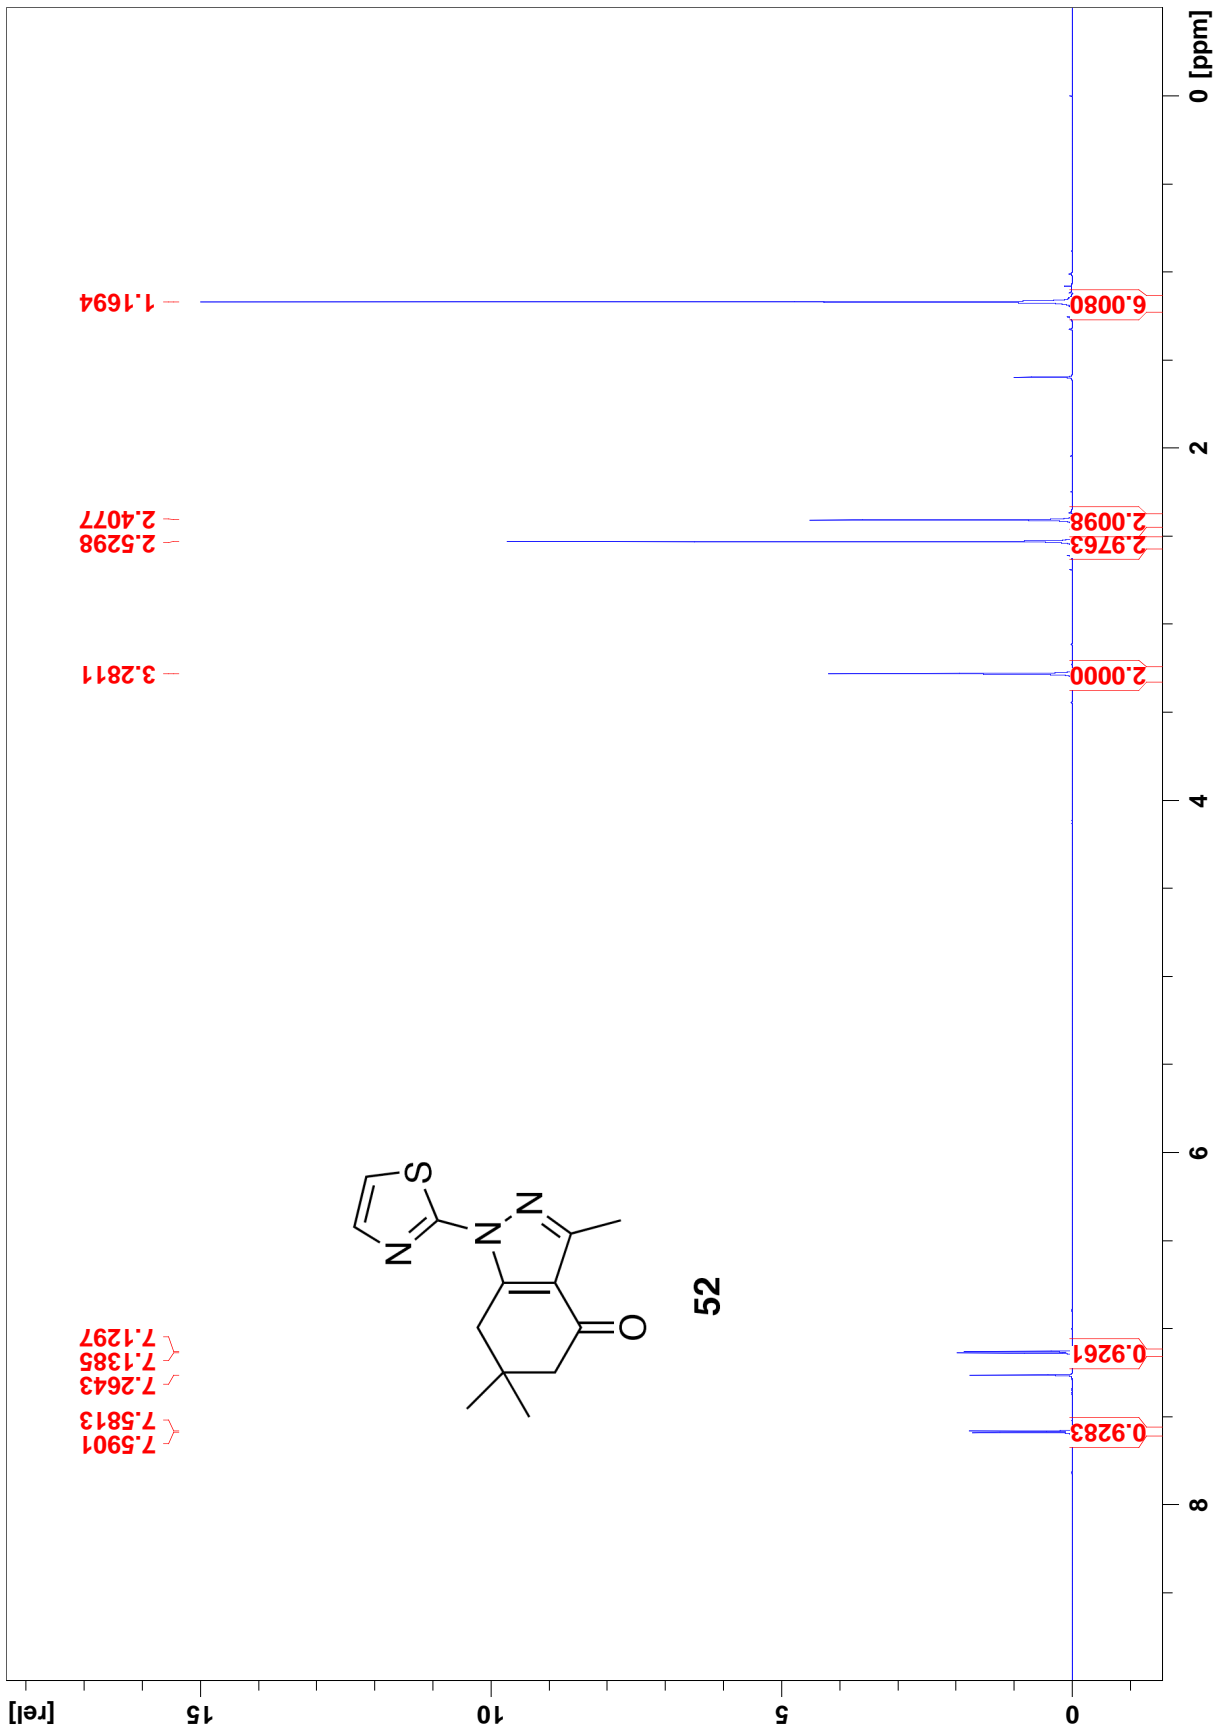



# 13C-NMR

JL09-071309 3 1 C:\Bruker\TOPSPIN leex3451

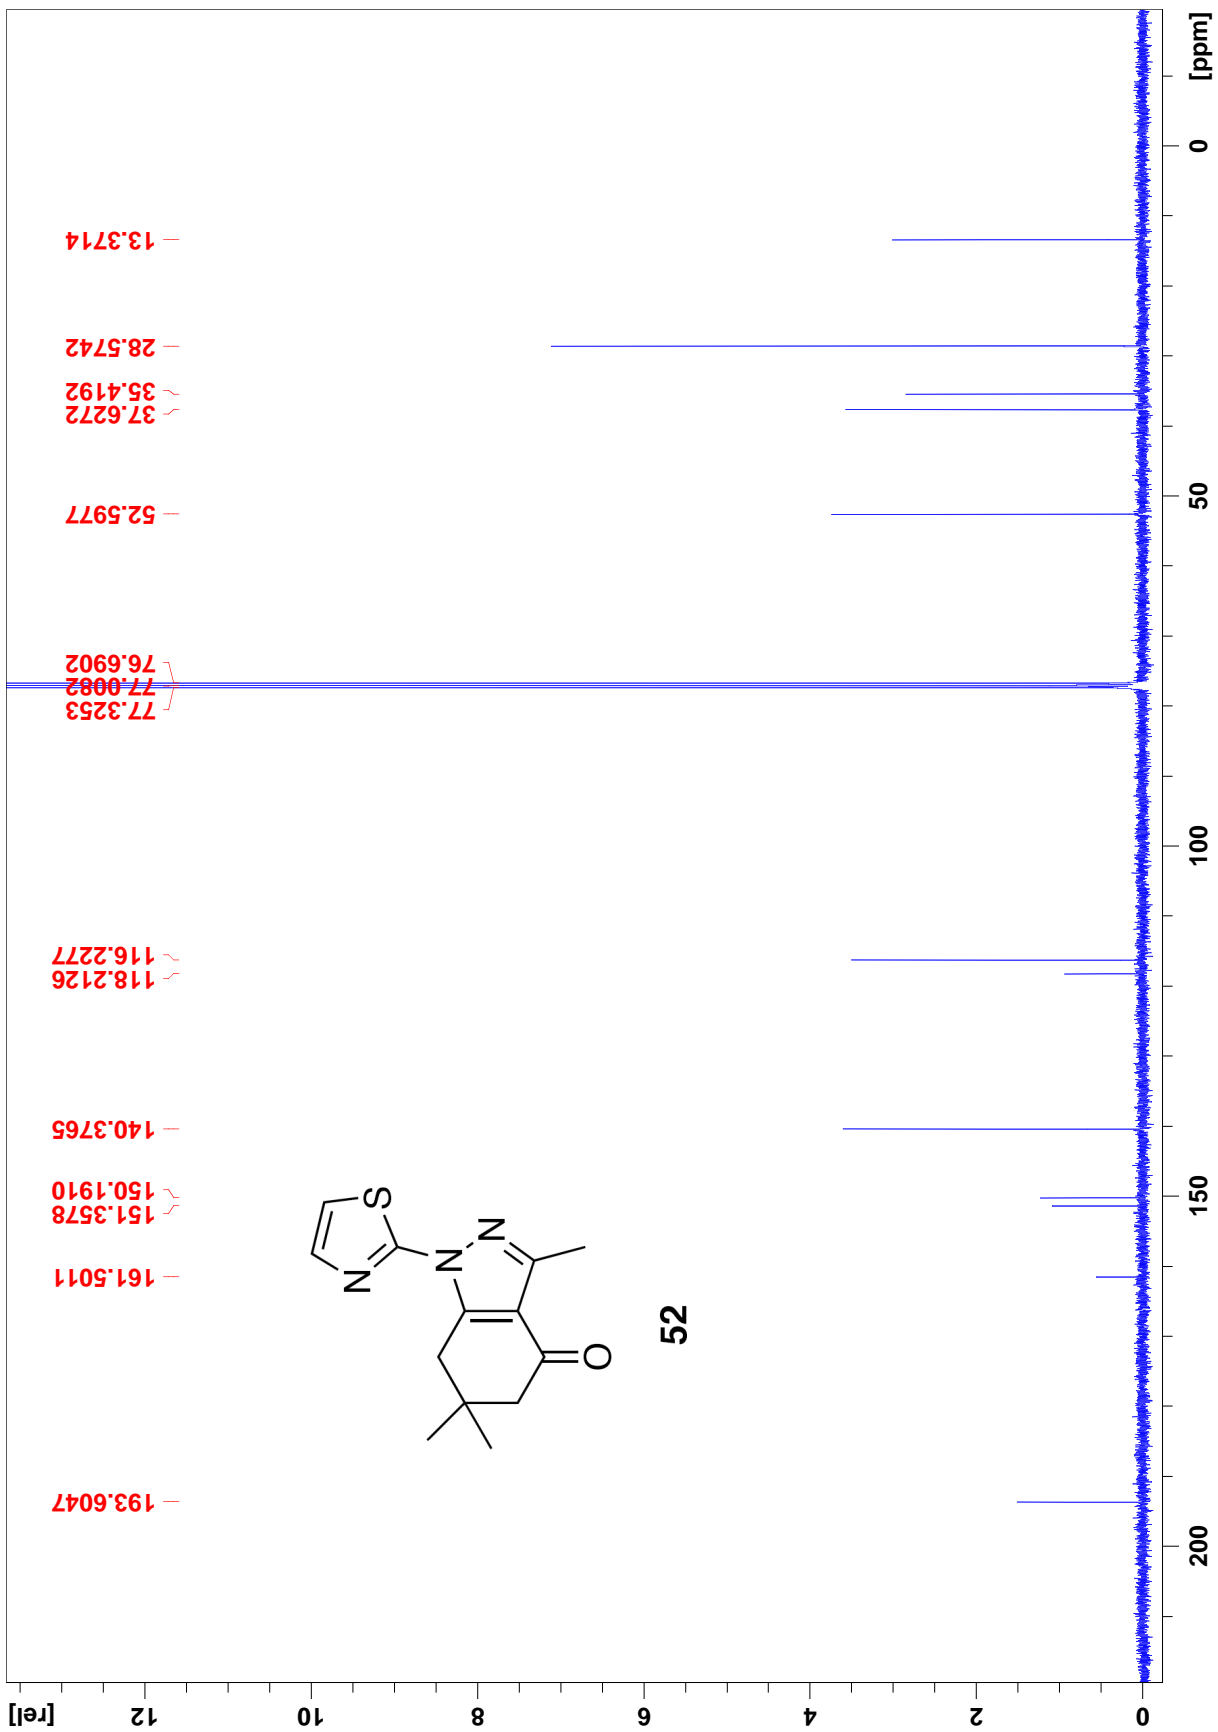

# 1H-NMR

JL09-072009 1 1 C:\Bruker\TOPSPIN leex3451

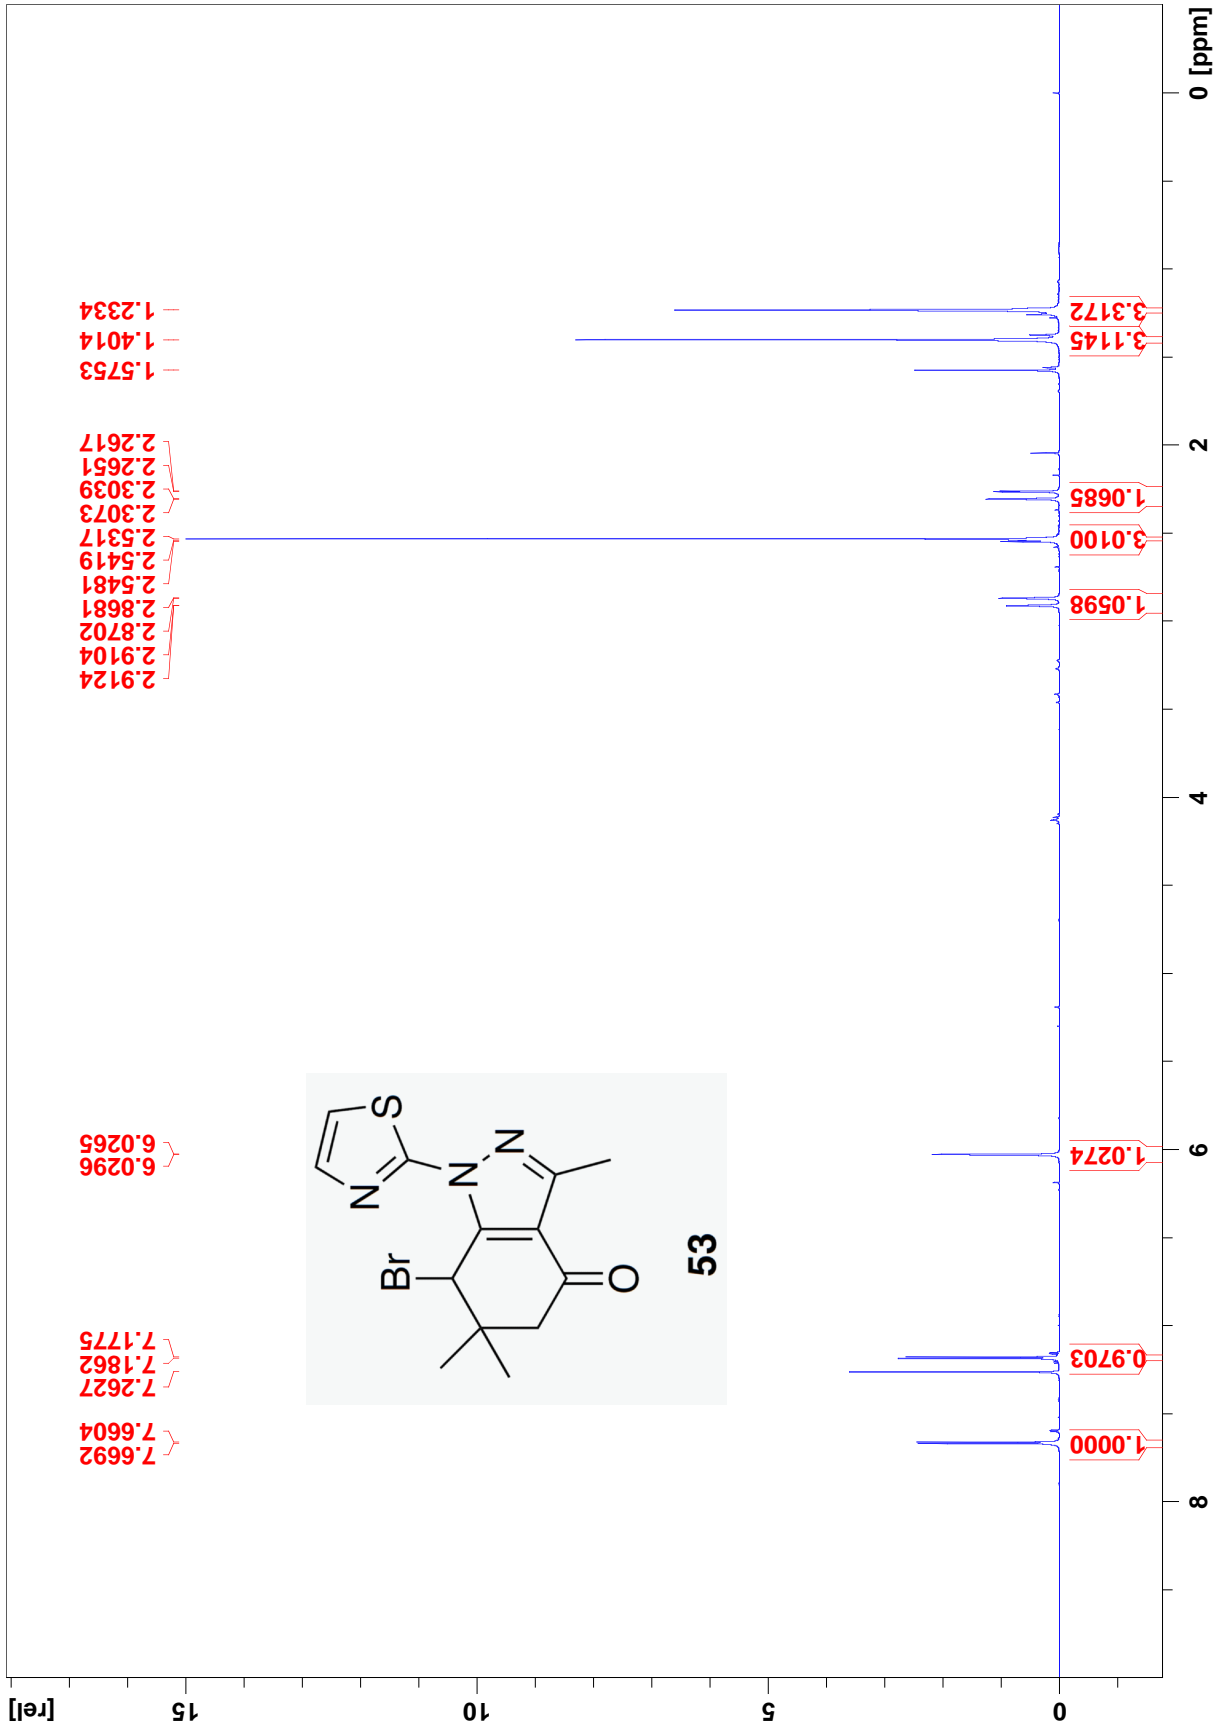

# 13C-NMR

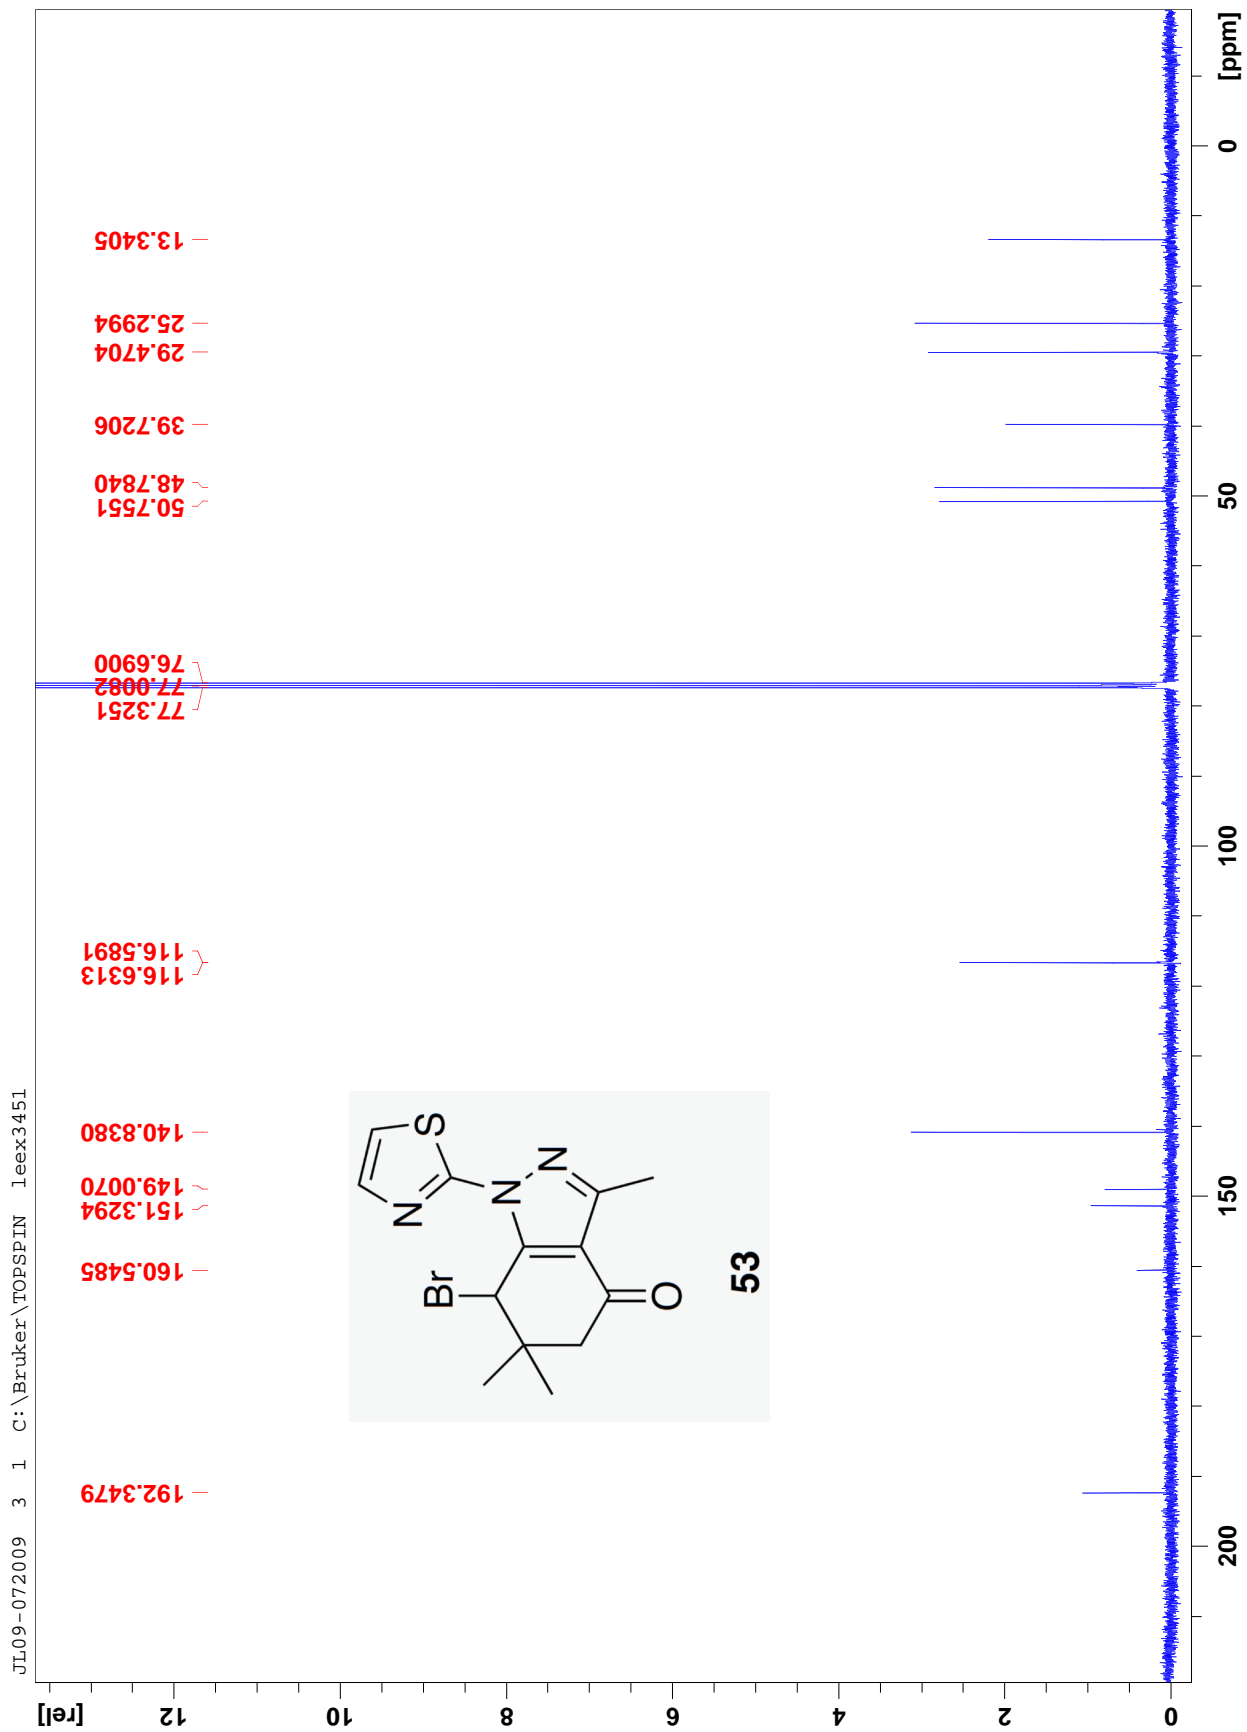

# 1H-NMR

JL09-070709 1 1 C:\Bruker\TOPSPIN leex3451

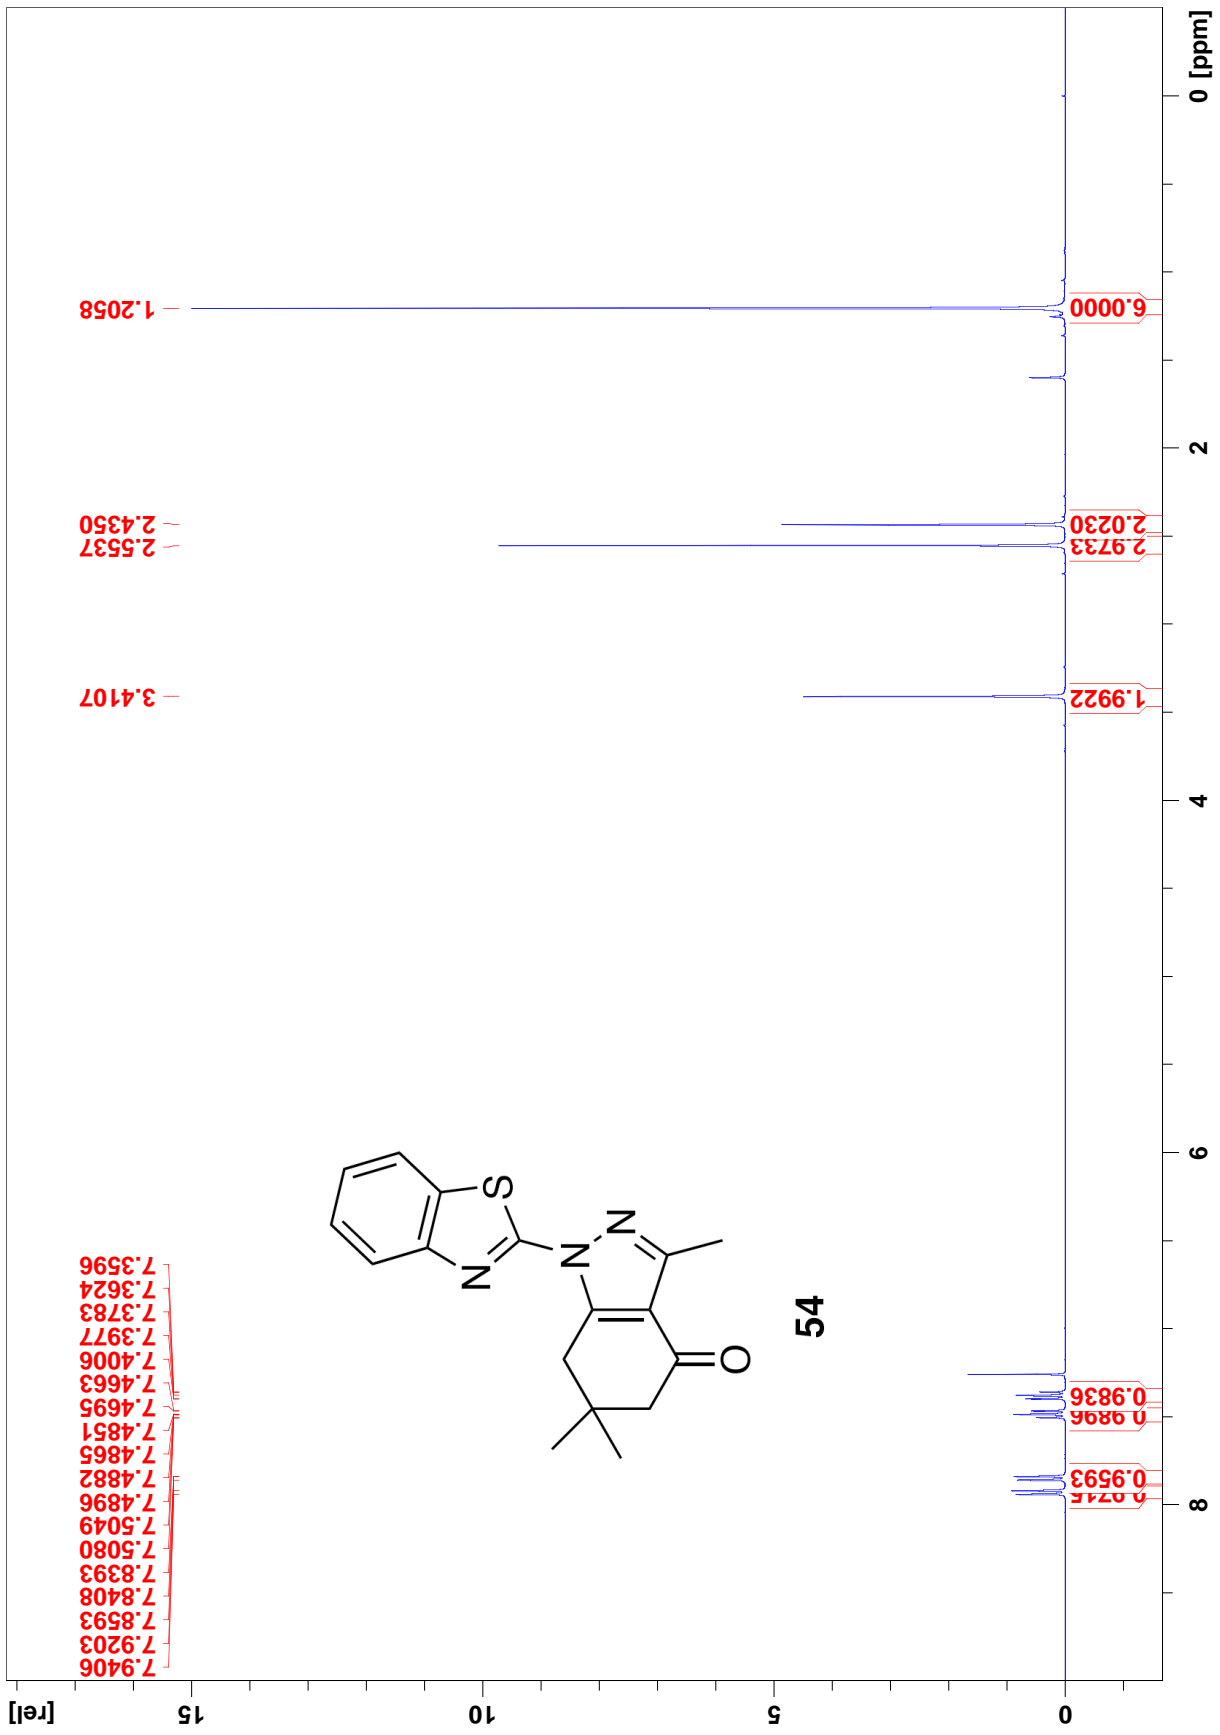

# 13C-NMR

JL09-070709 3 1 C:\Bruker\TOPSPIN leex3451

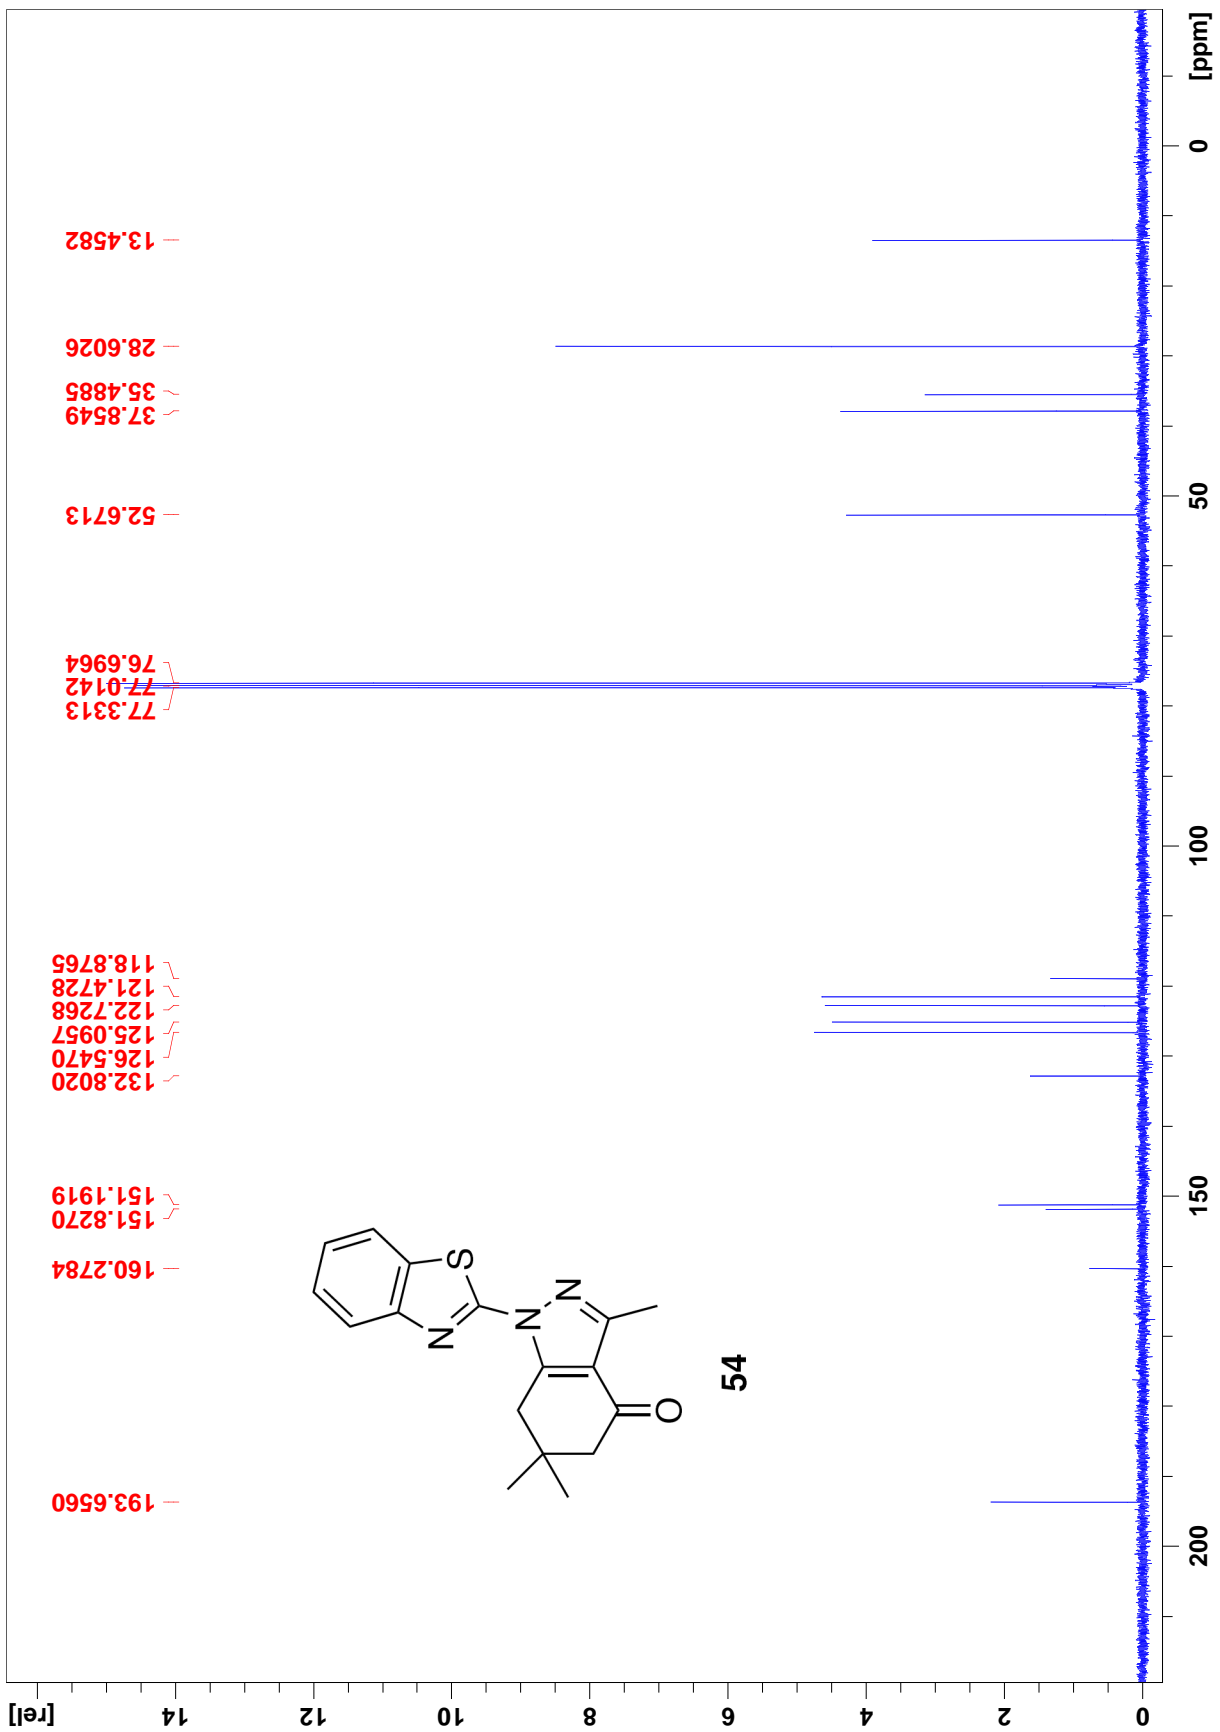

# 1H-NMR

JL09-072809 1 1 C:\Bruker\TOPSPIN leex3451

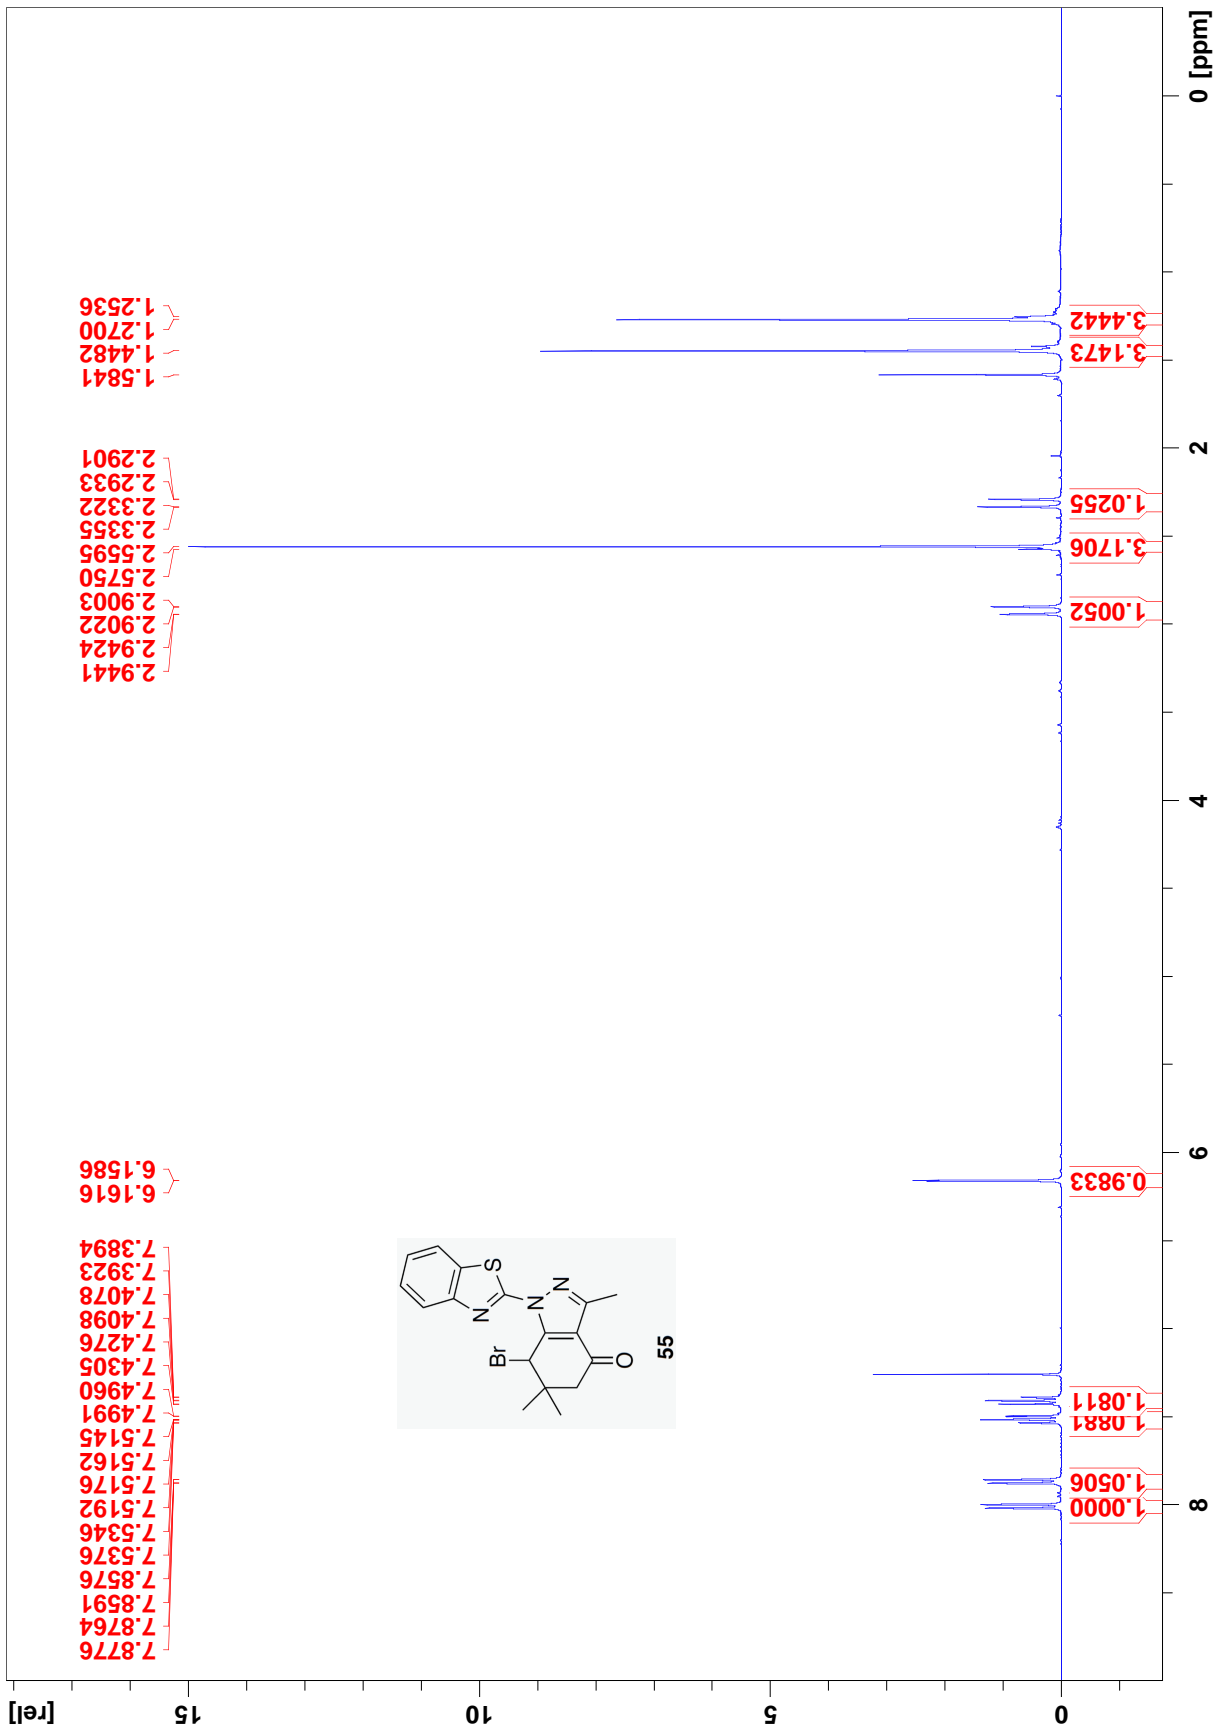

# 13C-NMR

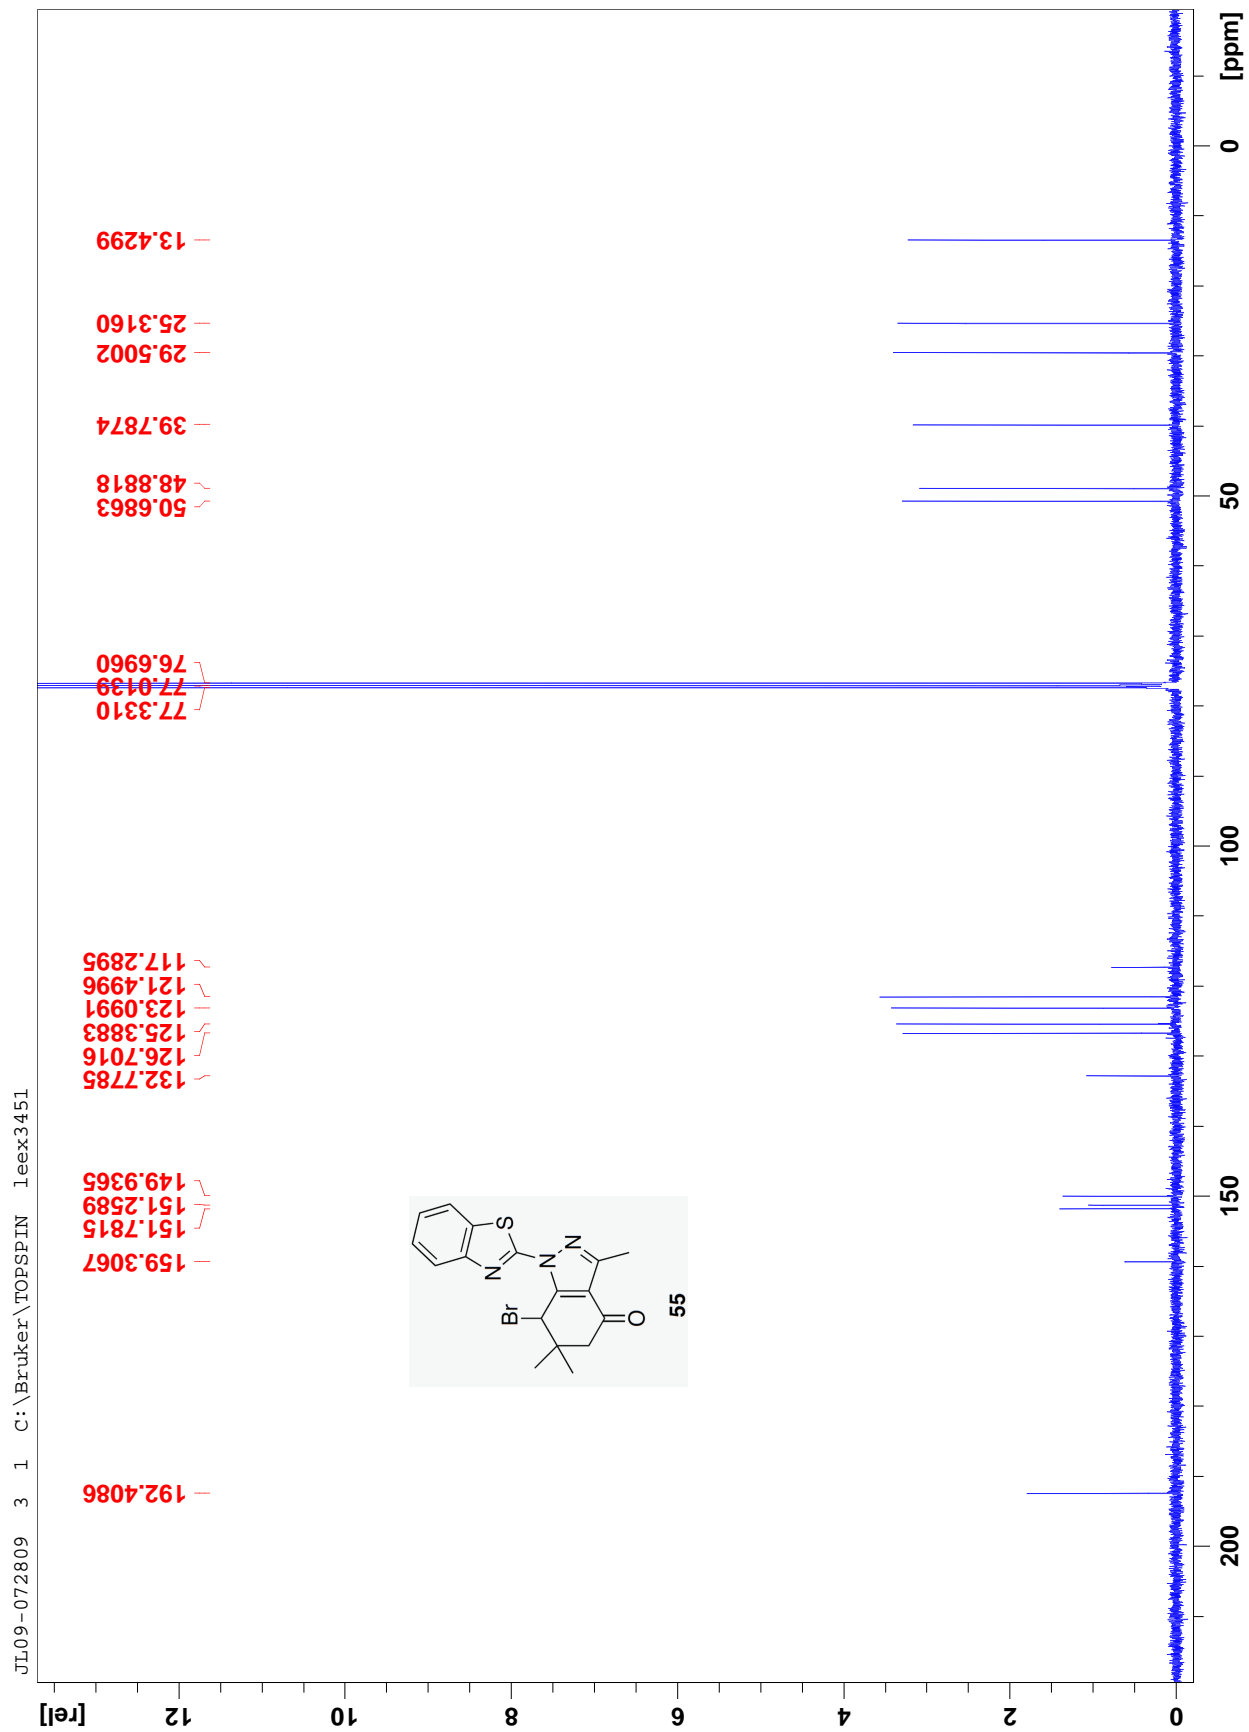

# 1H-NMR

JL09-071909-1 1 1 C:\Bruker\TOPSPIN leex3451

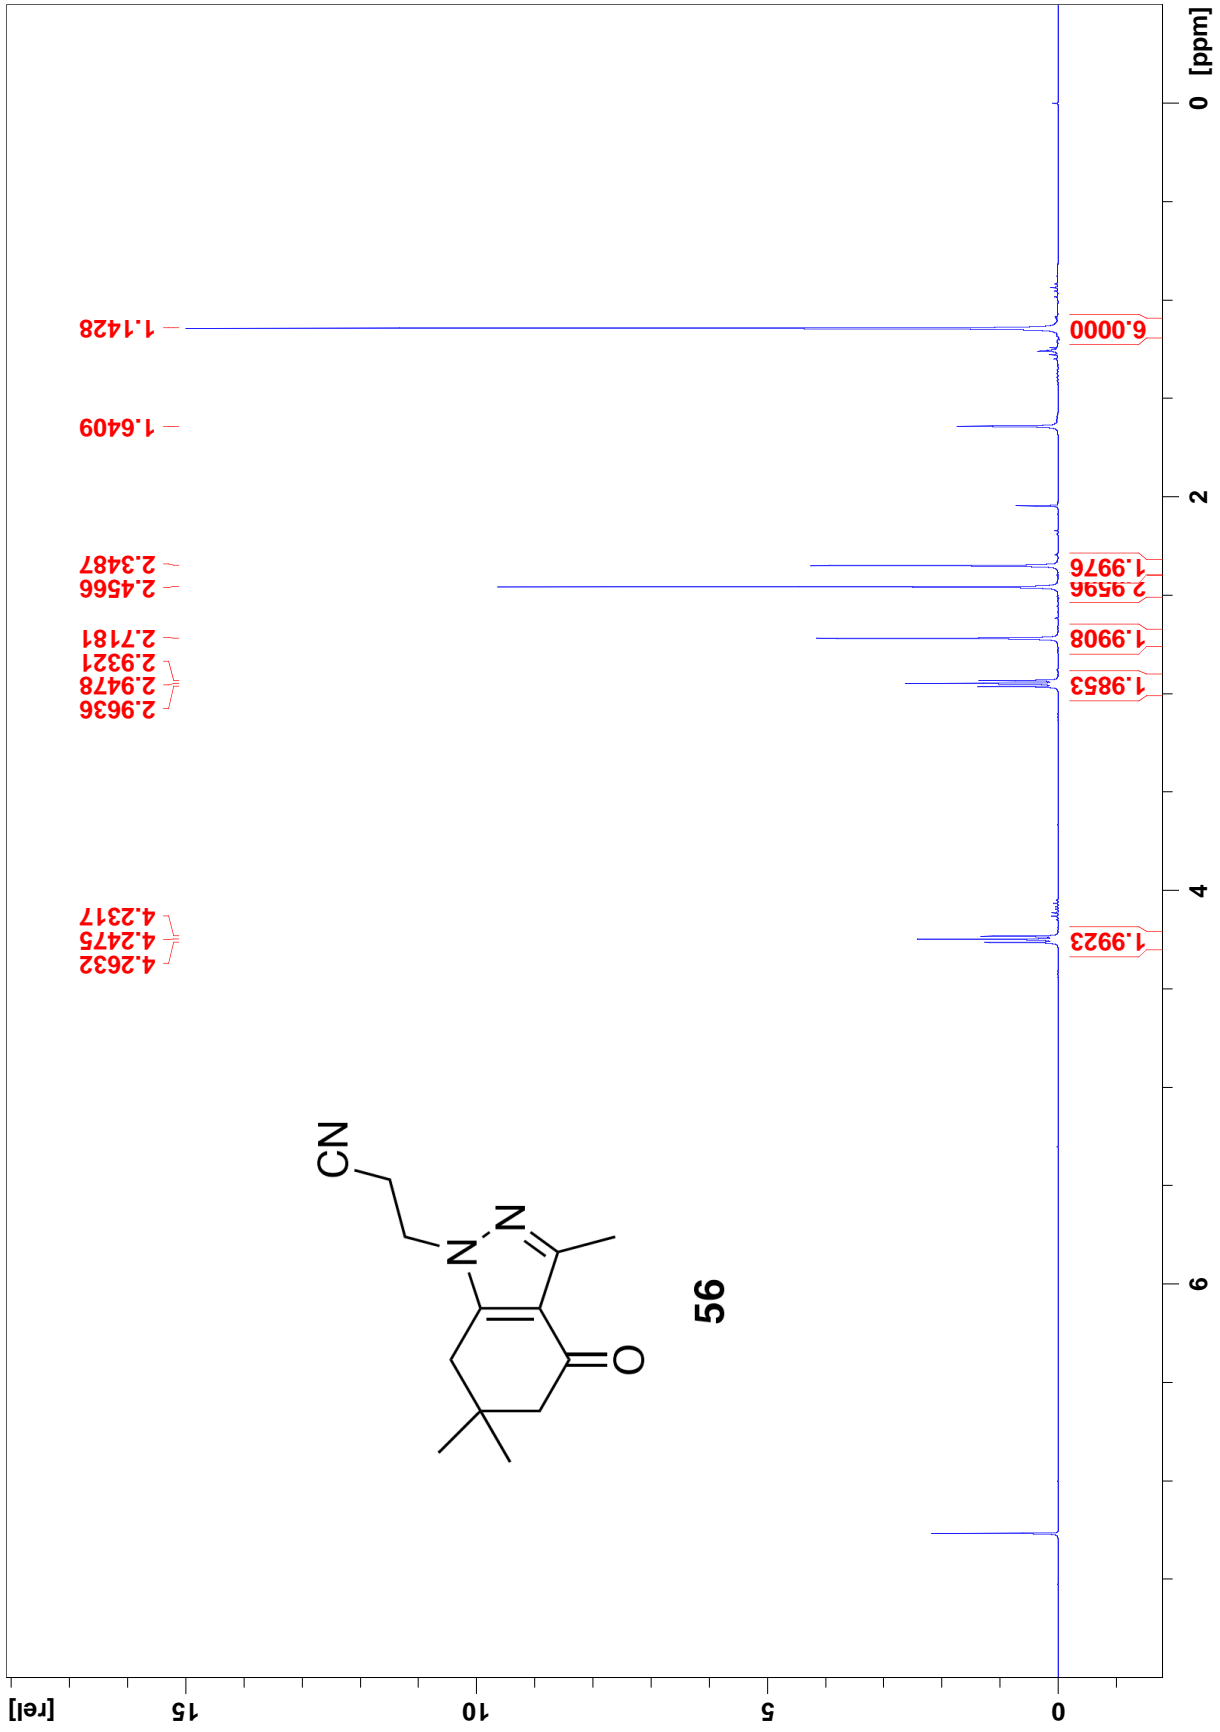



# 13C-NMR

JL09-071409 3 1 C:\Bruker\TOPSPIN leex3451

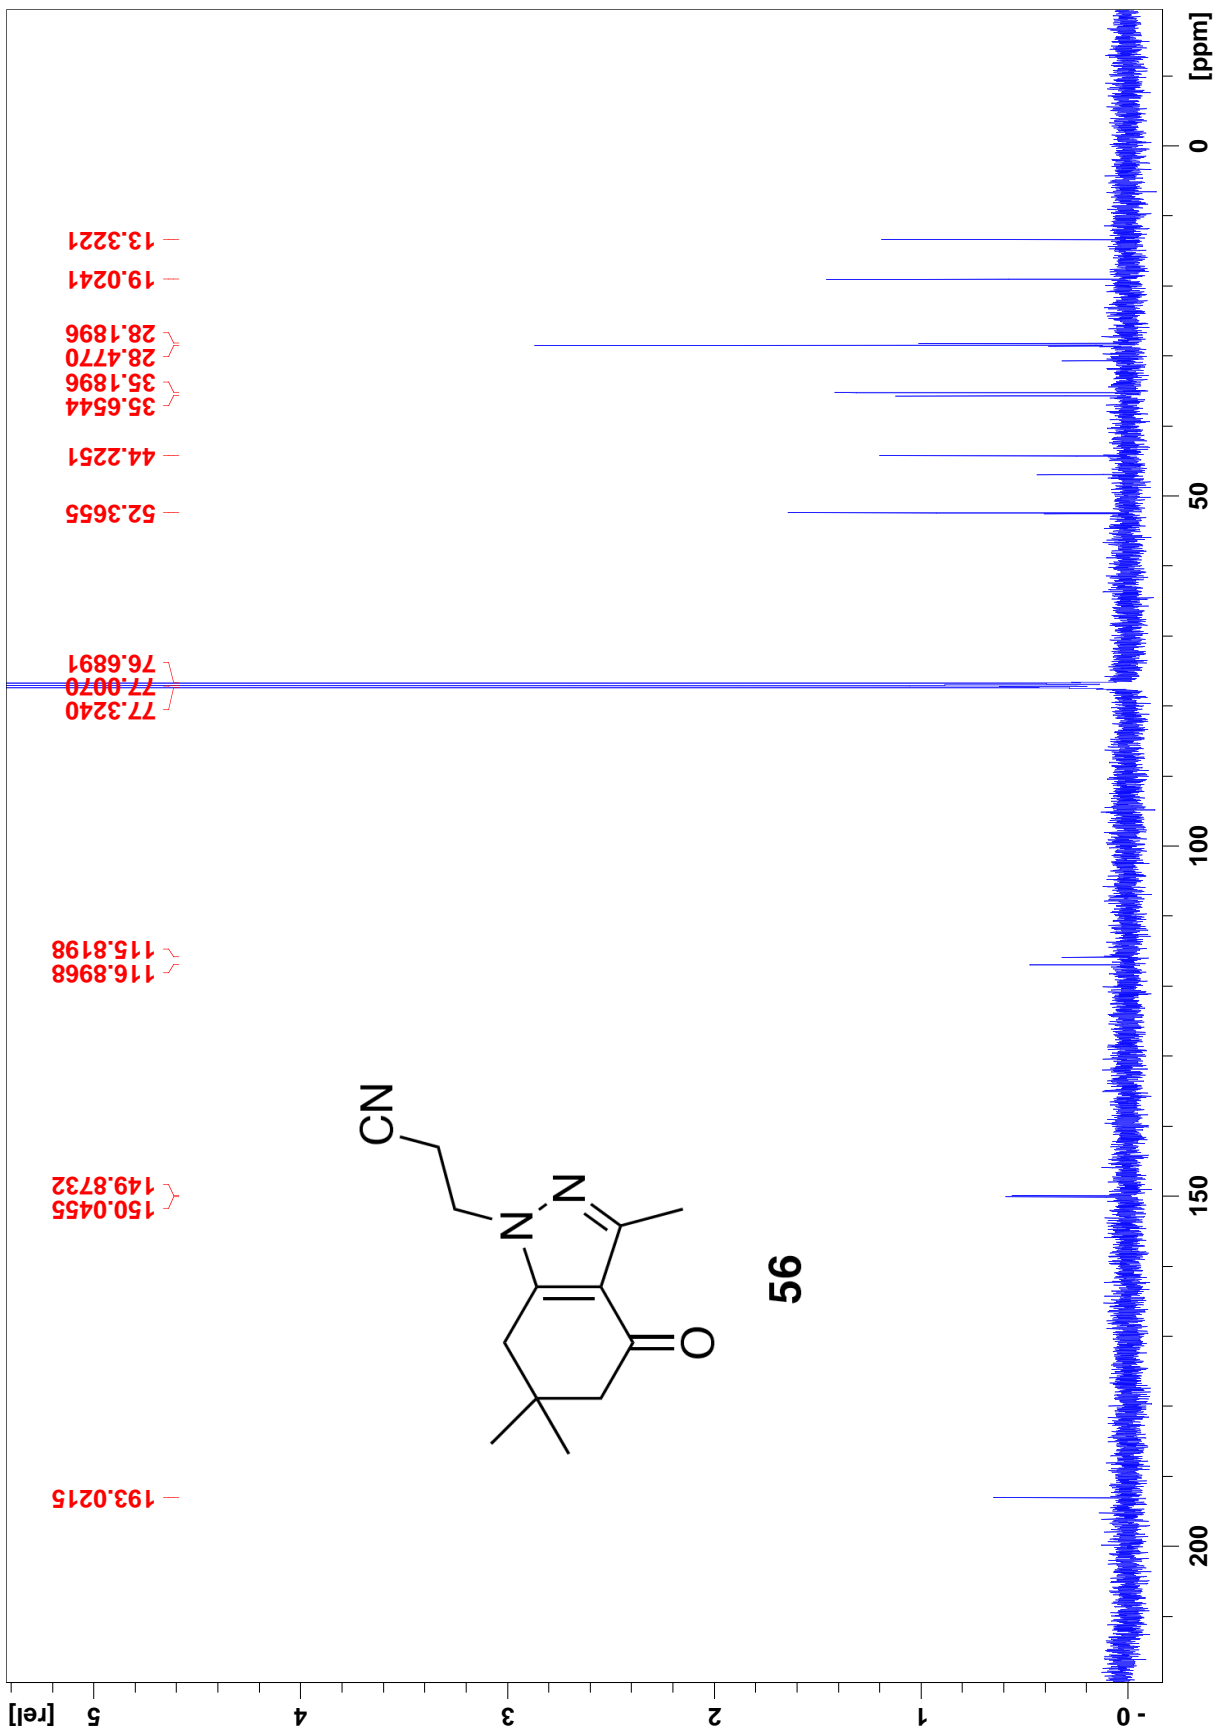

# 1H-NMR

JL09-072309 1 1 C:\Bruker\TOPSPIN leex3451

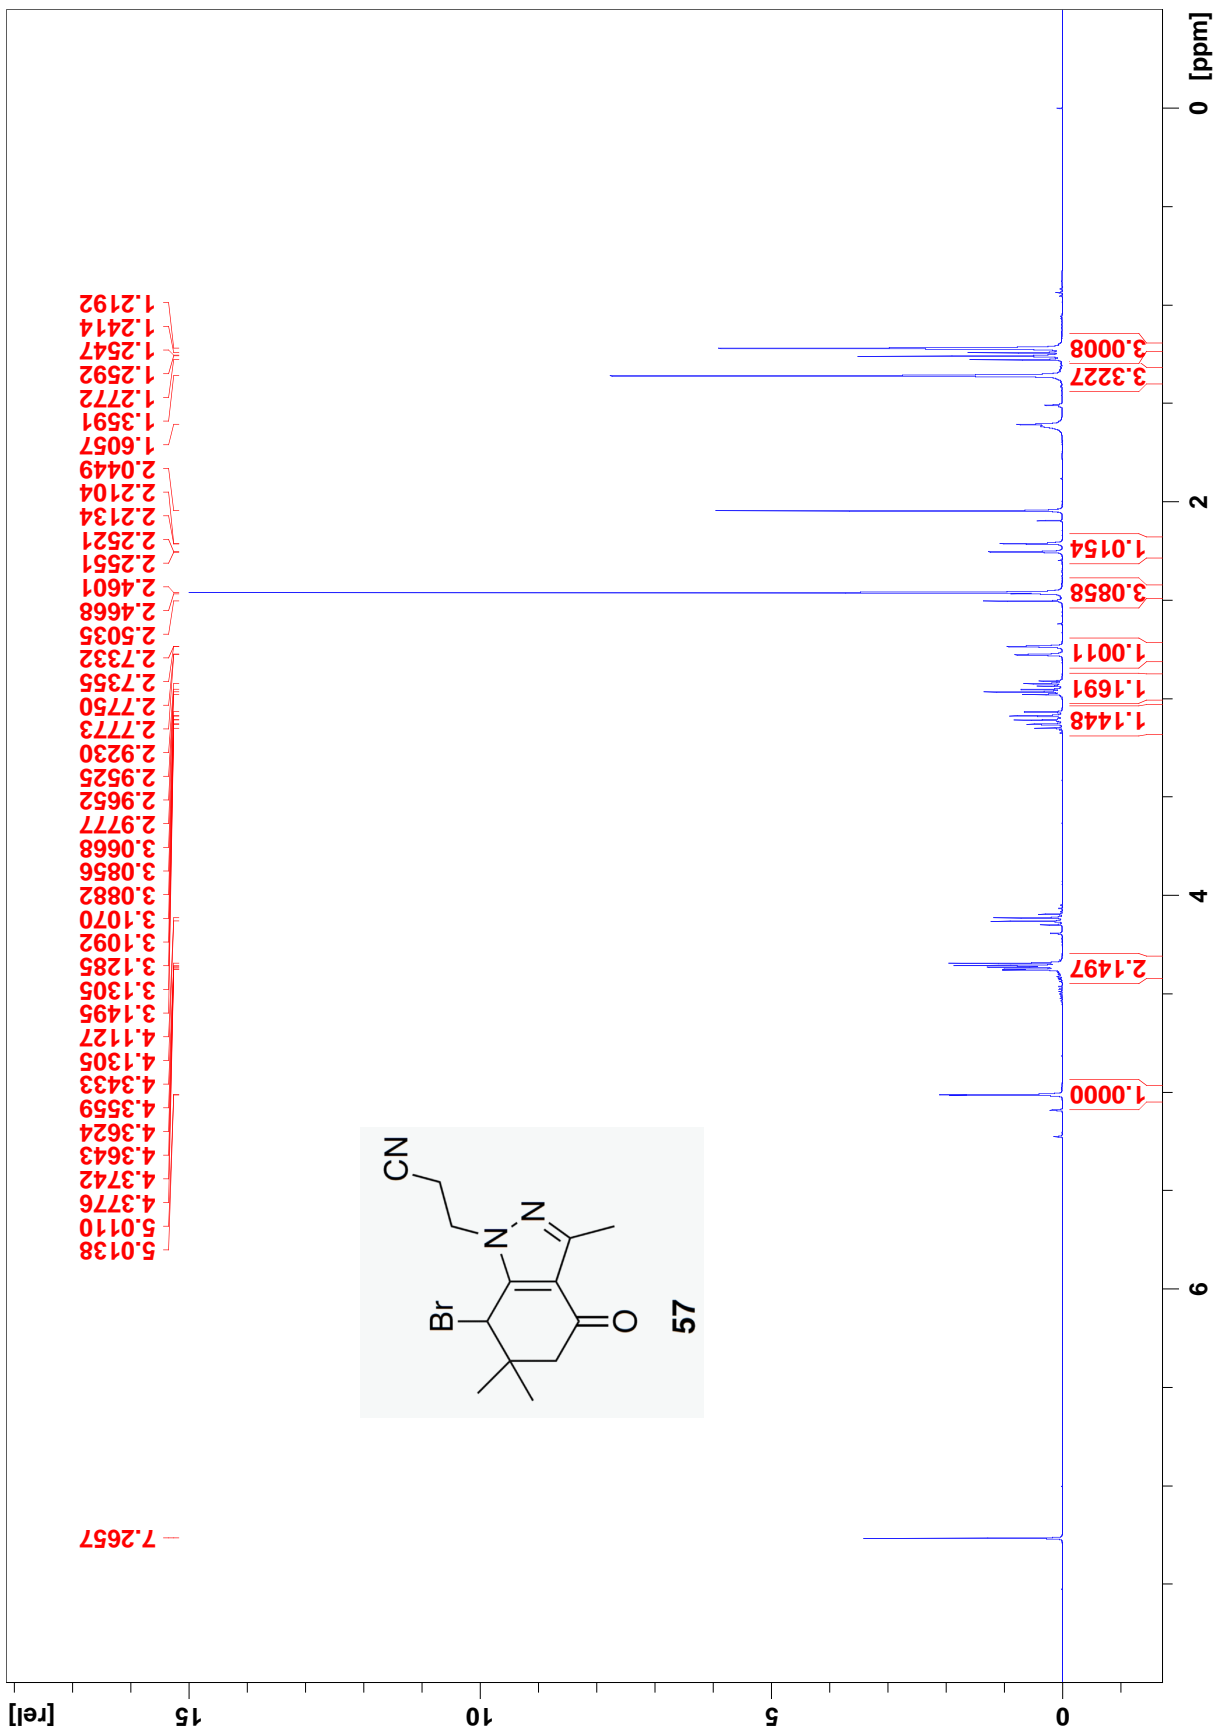

# 13C-NMR

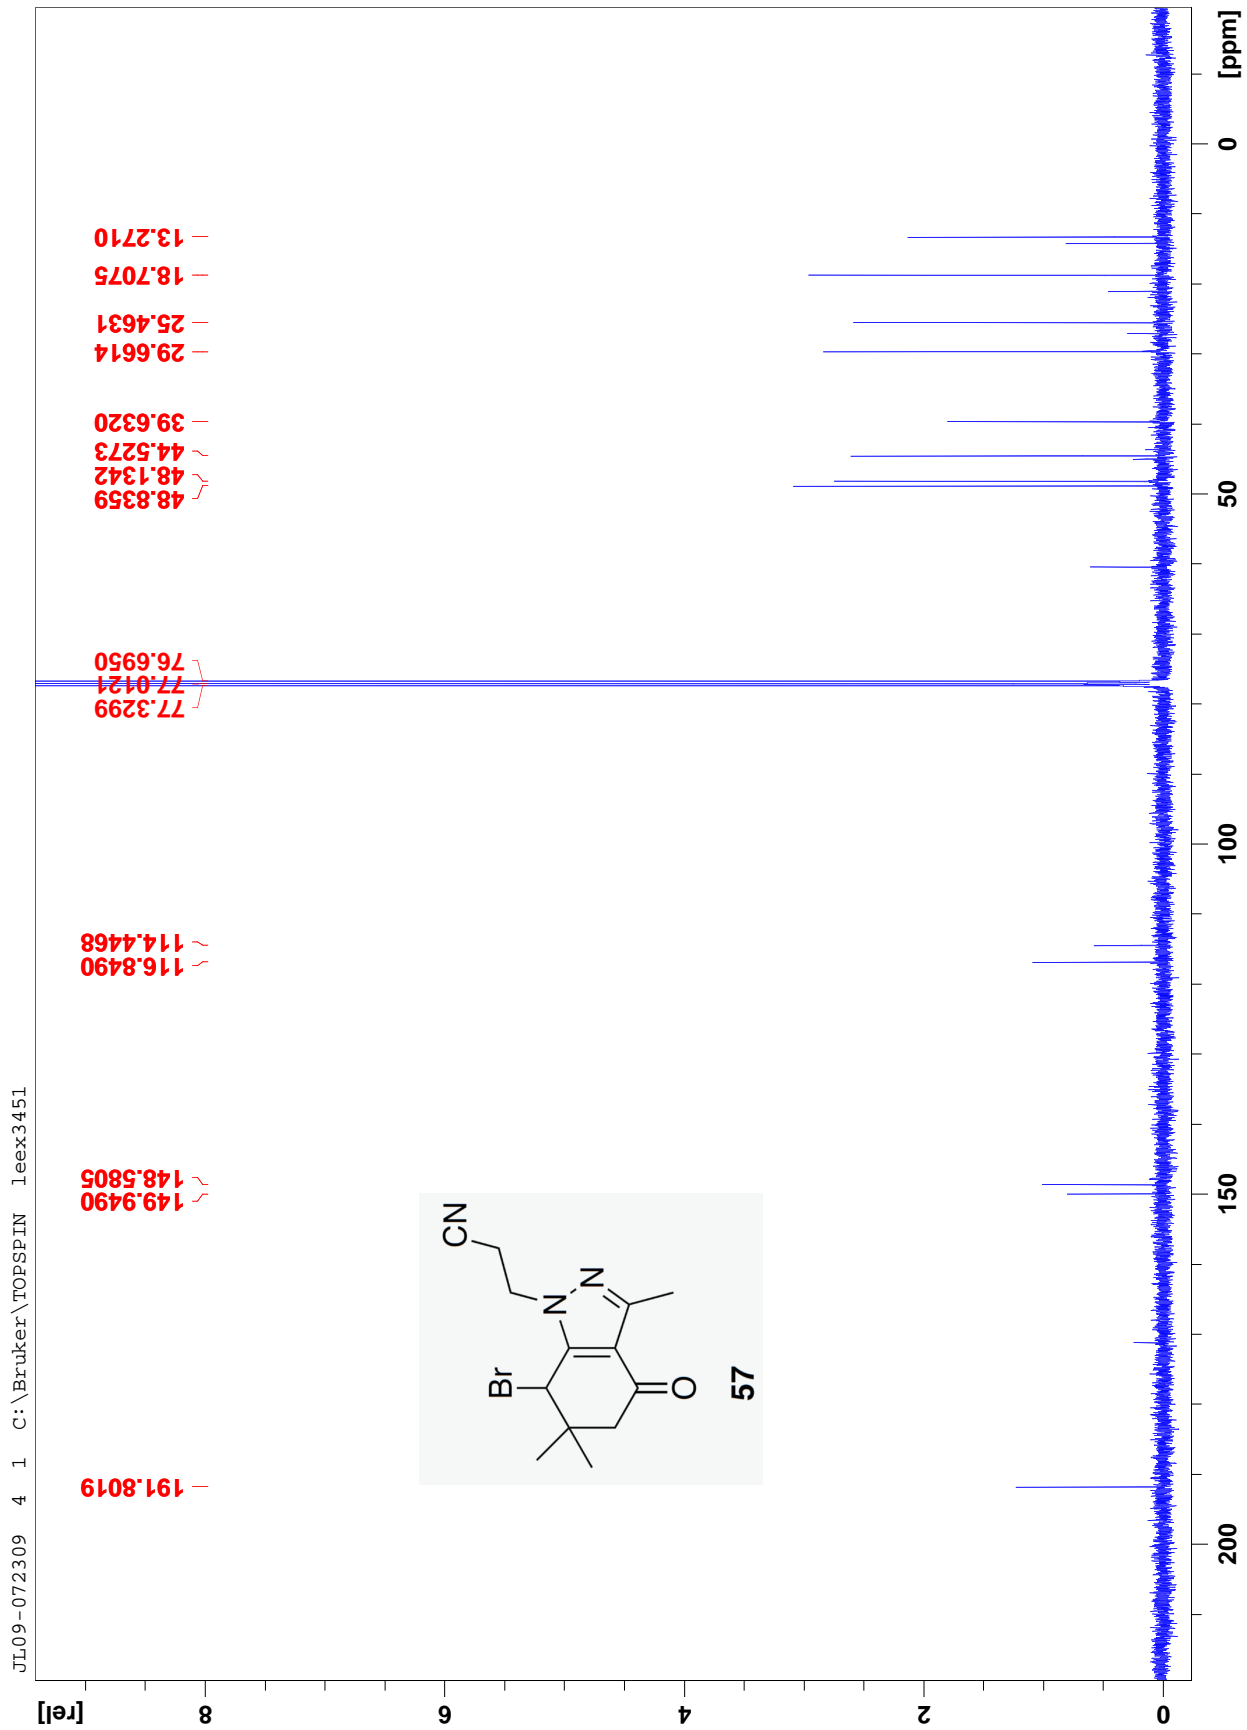

# 1H-NMR

JL09-092109 1 1 C:\Bruker\TOPSPIN leex3451

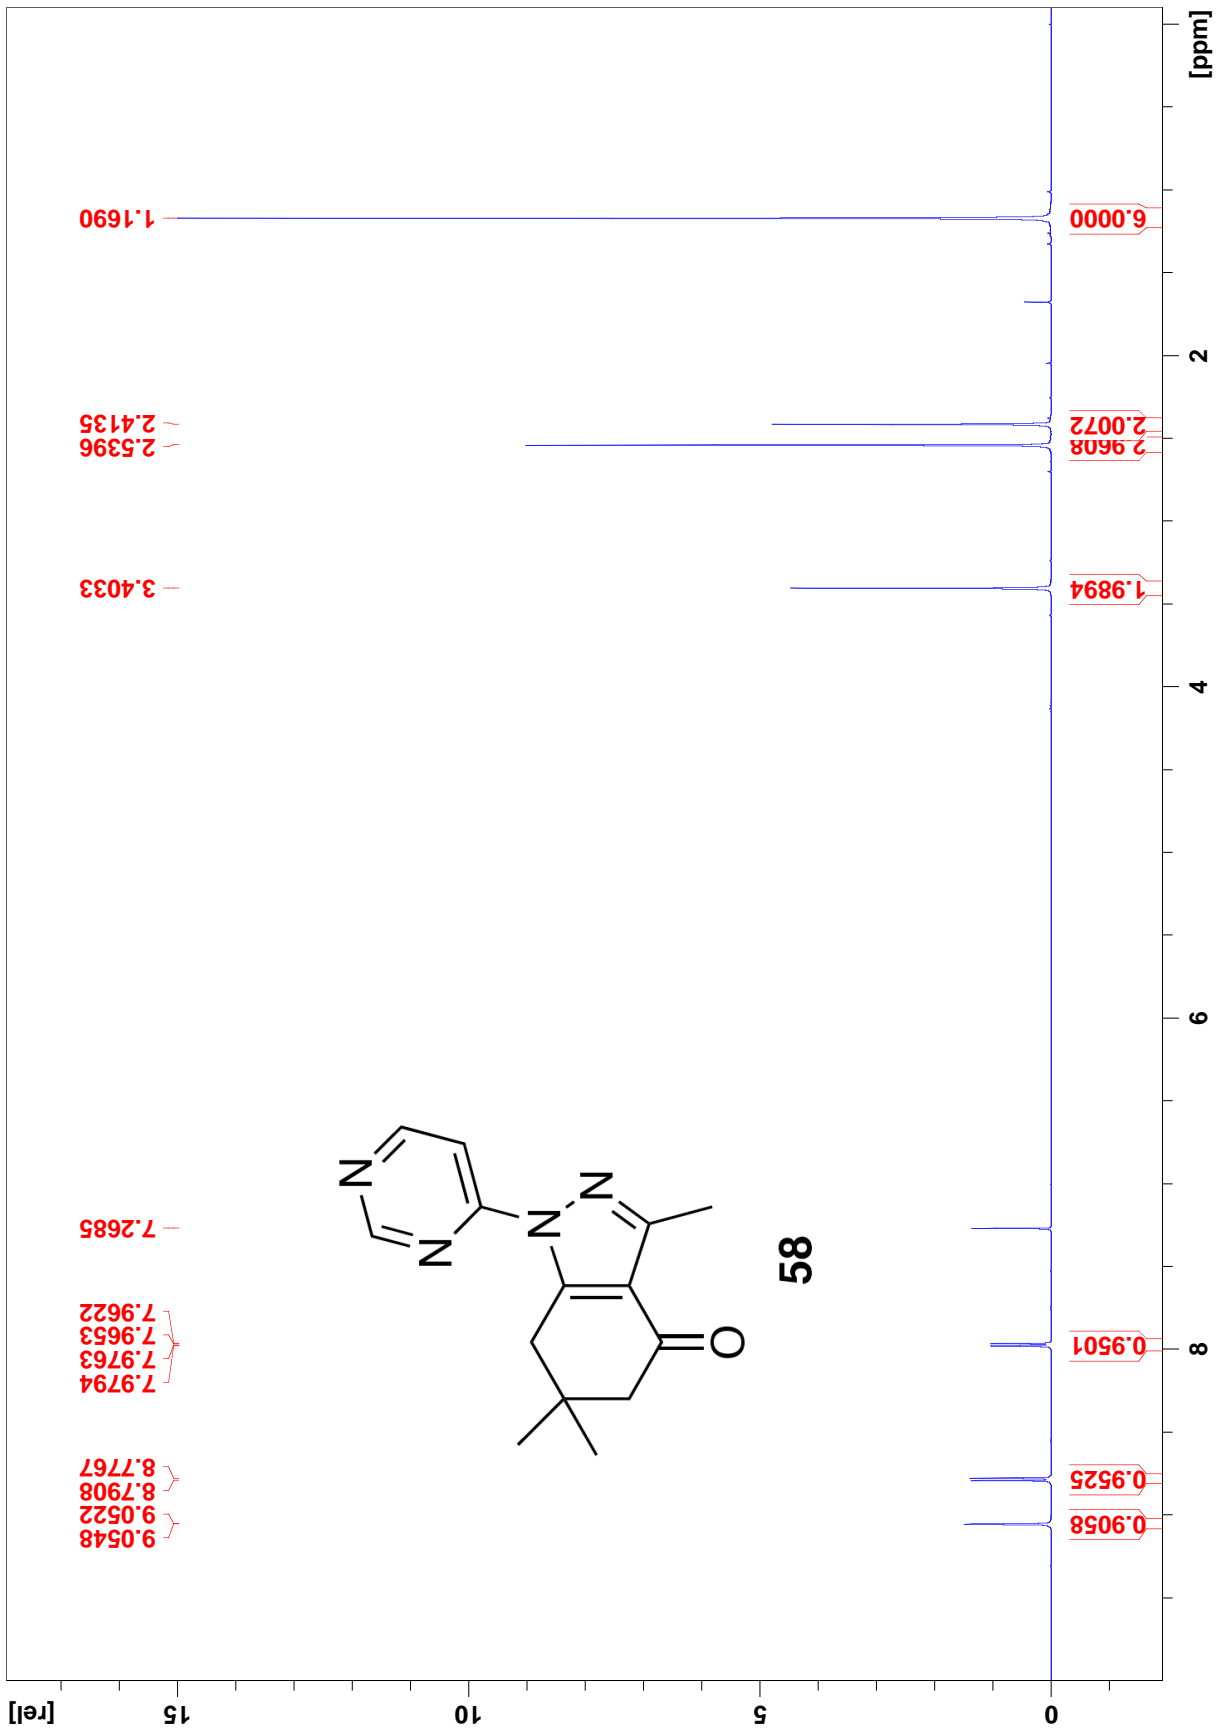

# 13C-NMR

JL09-092109 3 1 C:\Bruker\TOPSPIN leex3451

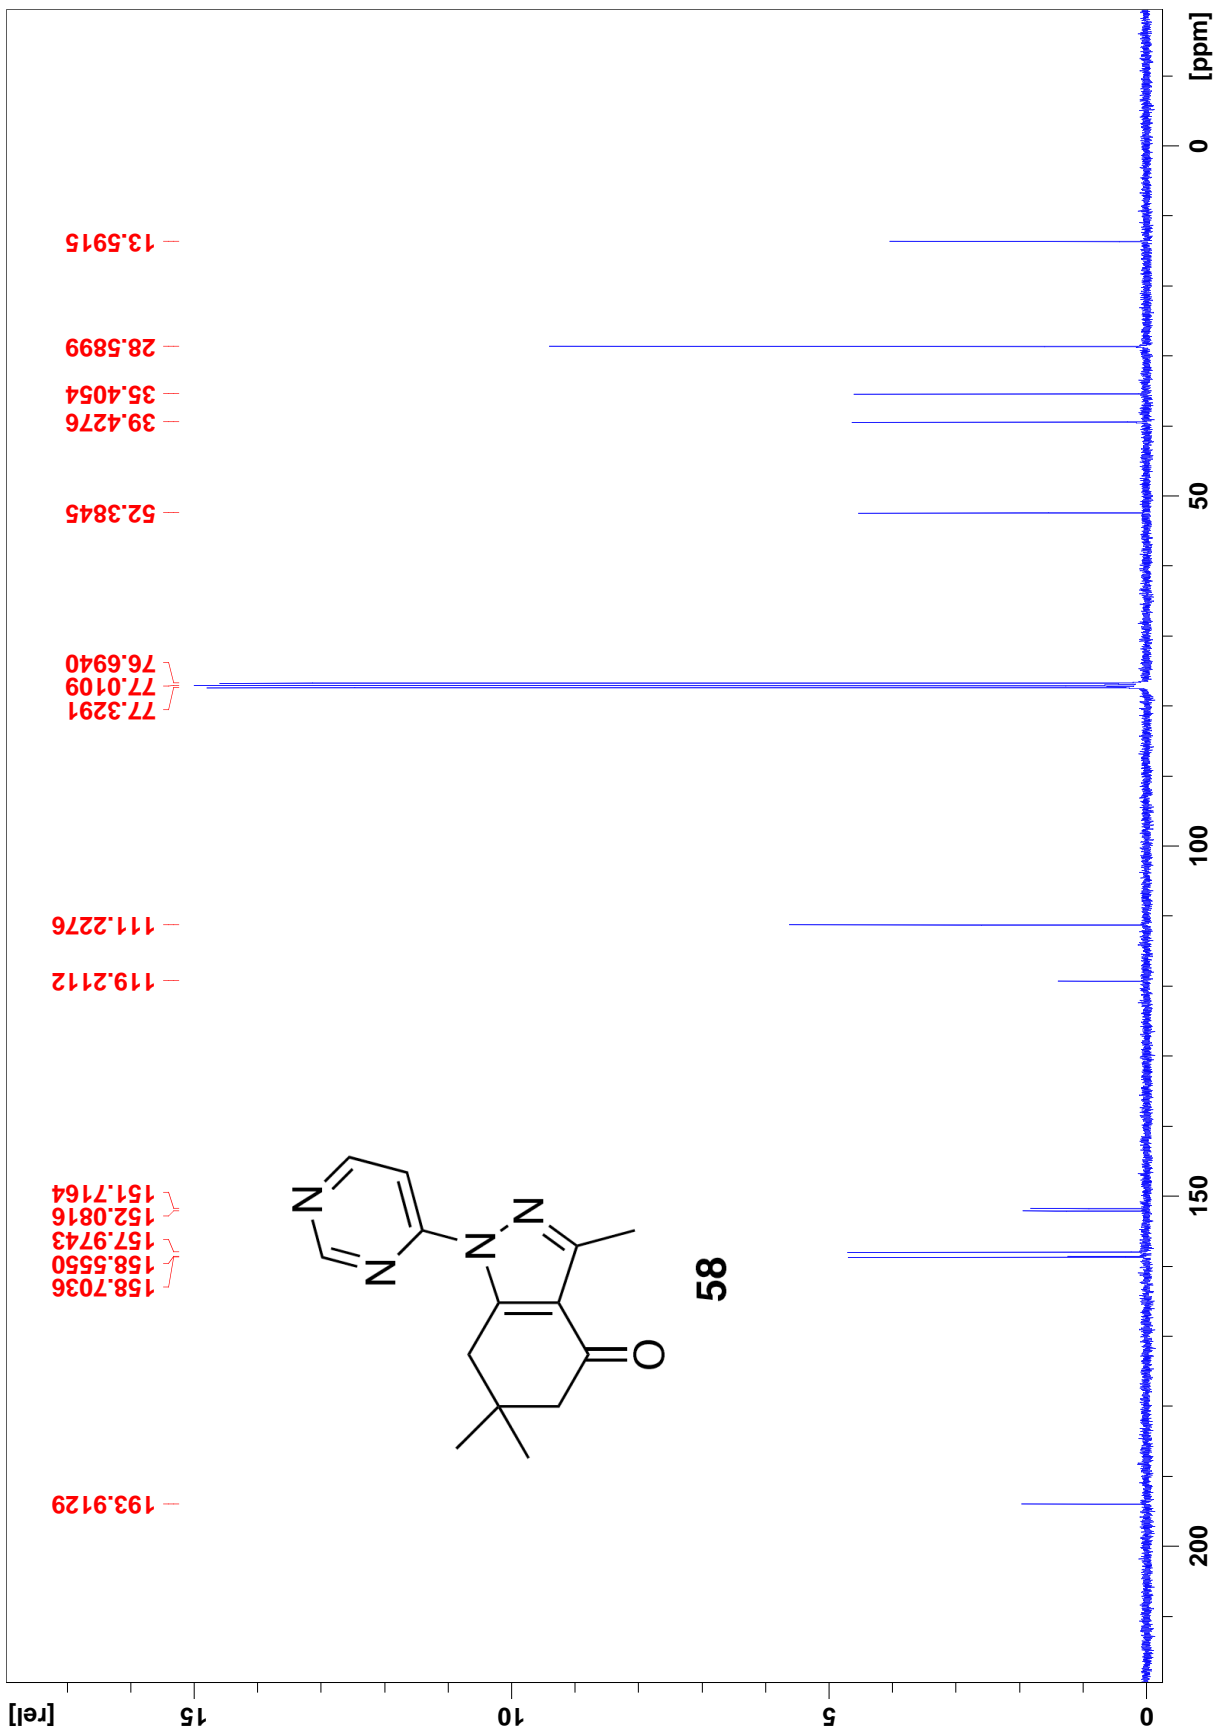

# 1H-NMR

JL09-100209 1 1 C:\Bruker\TOPSPIN leex3451

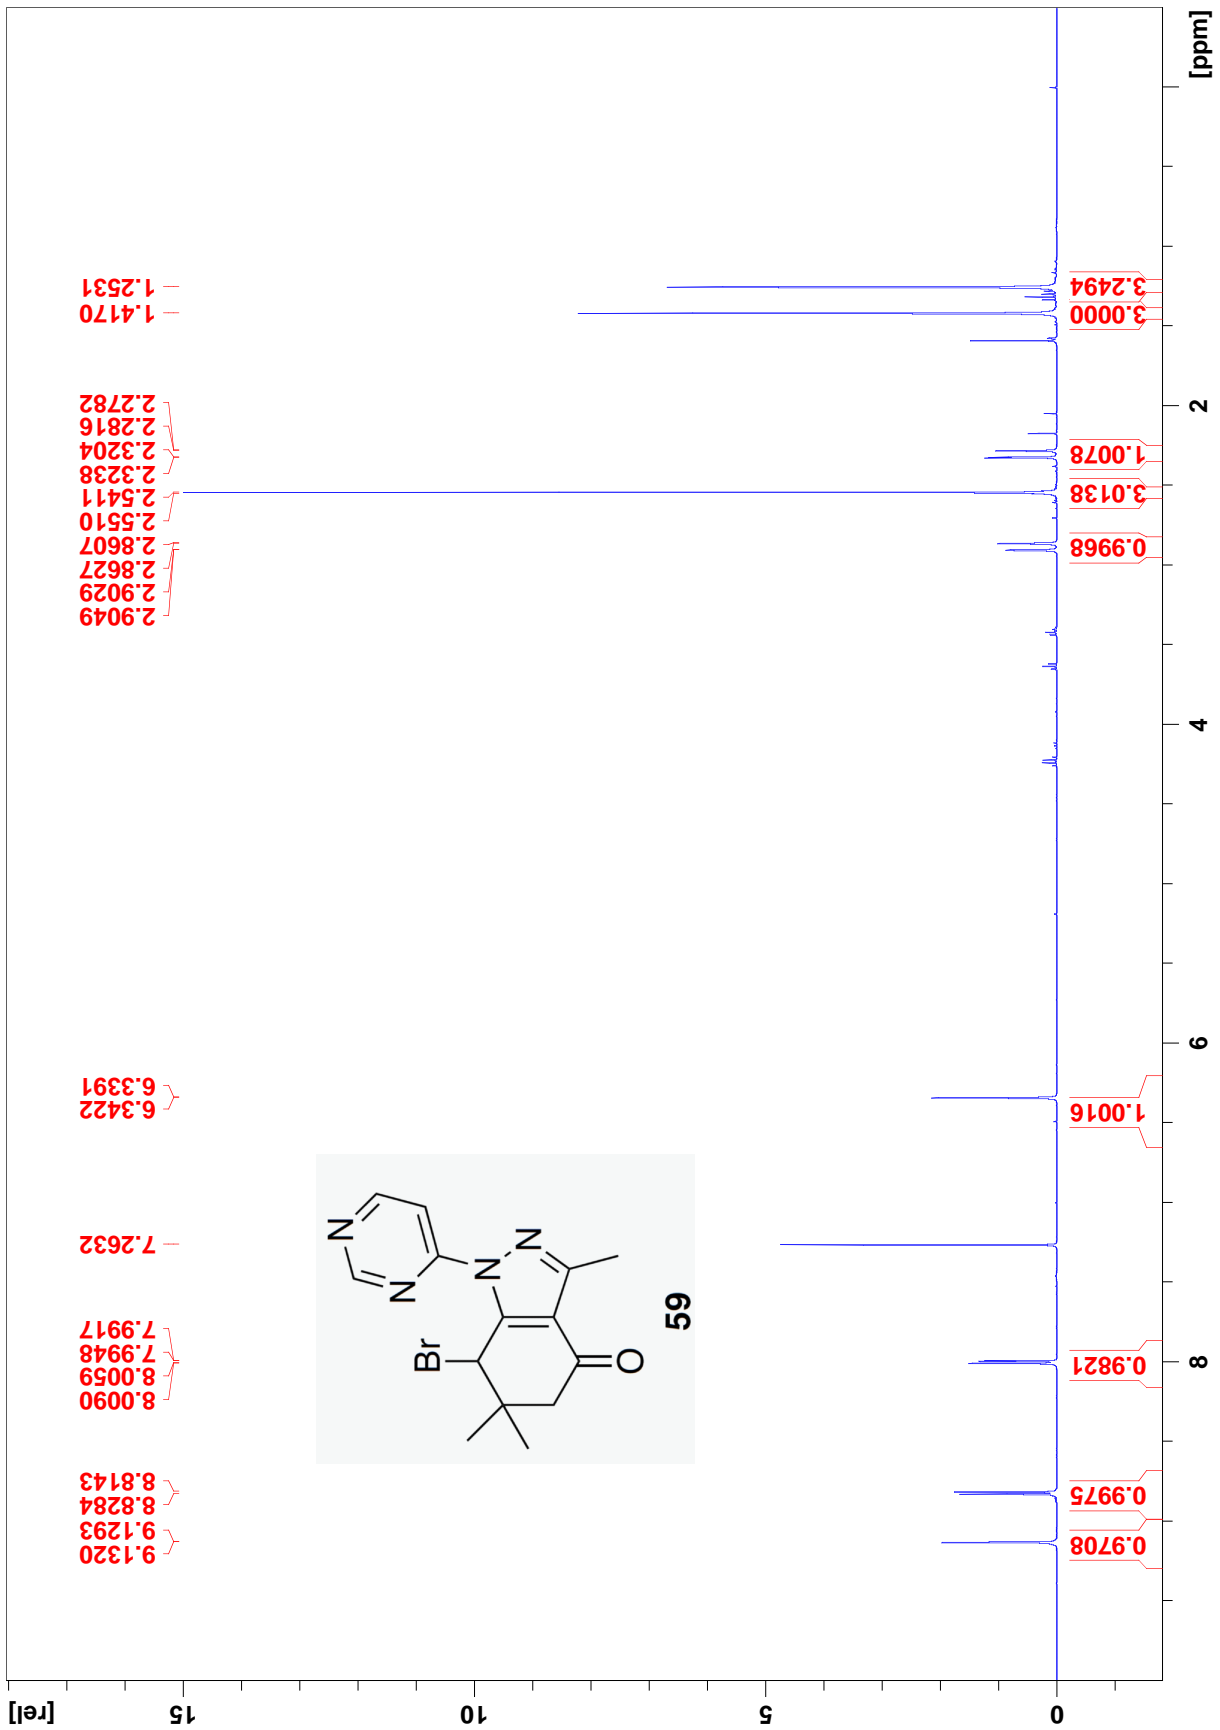

# 13C-NMR

JL09-100209 3 1 C:\Bruker\TOPSPIN leex3451

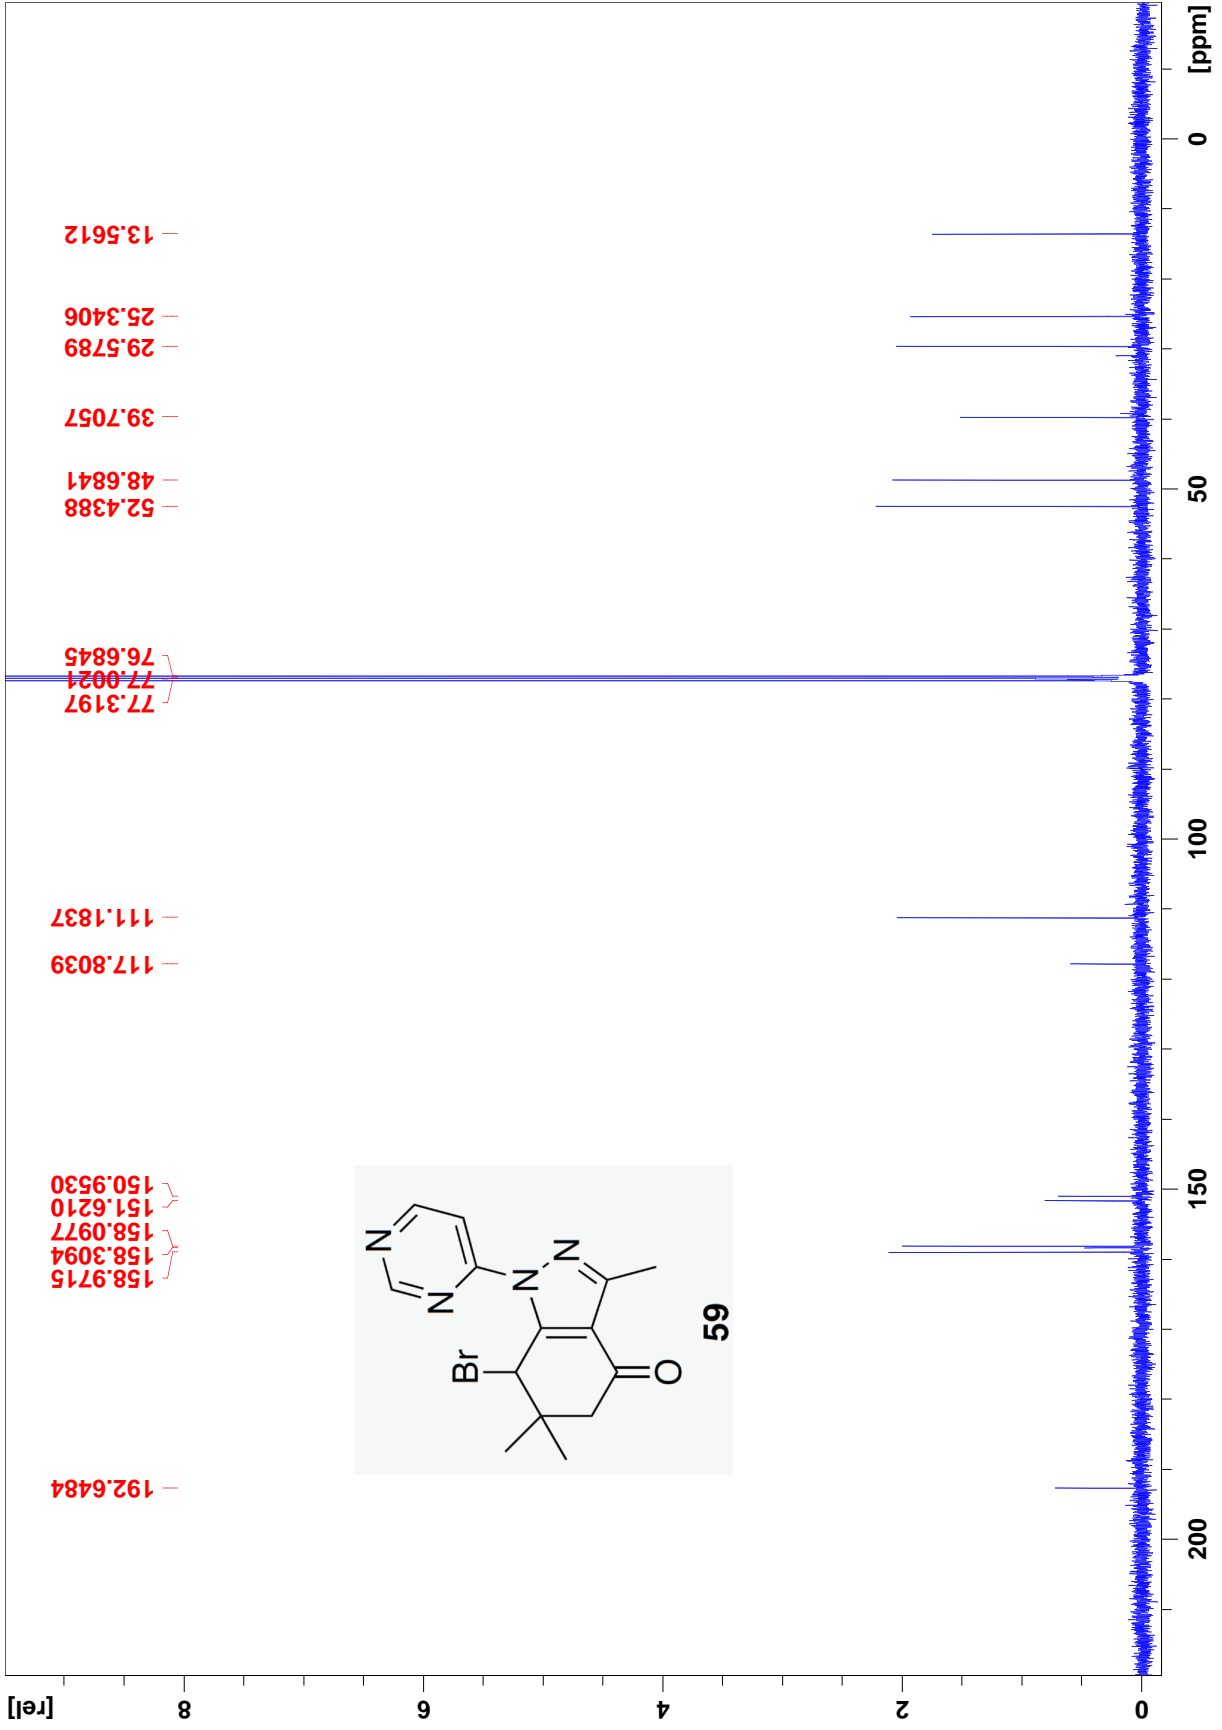

# 1H-NMR

JL09-092209 1 1 C:\Bruker\TOPSPIN leex3451

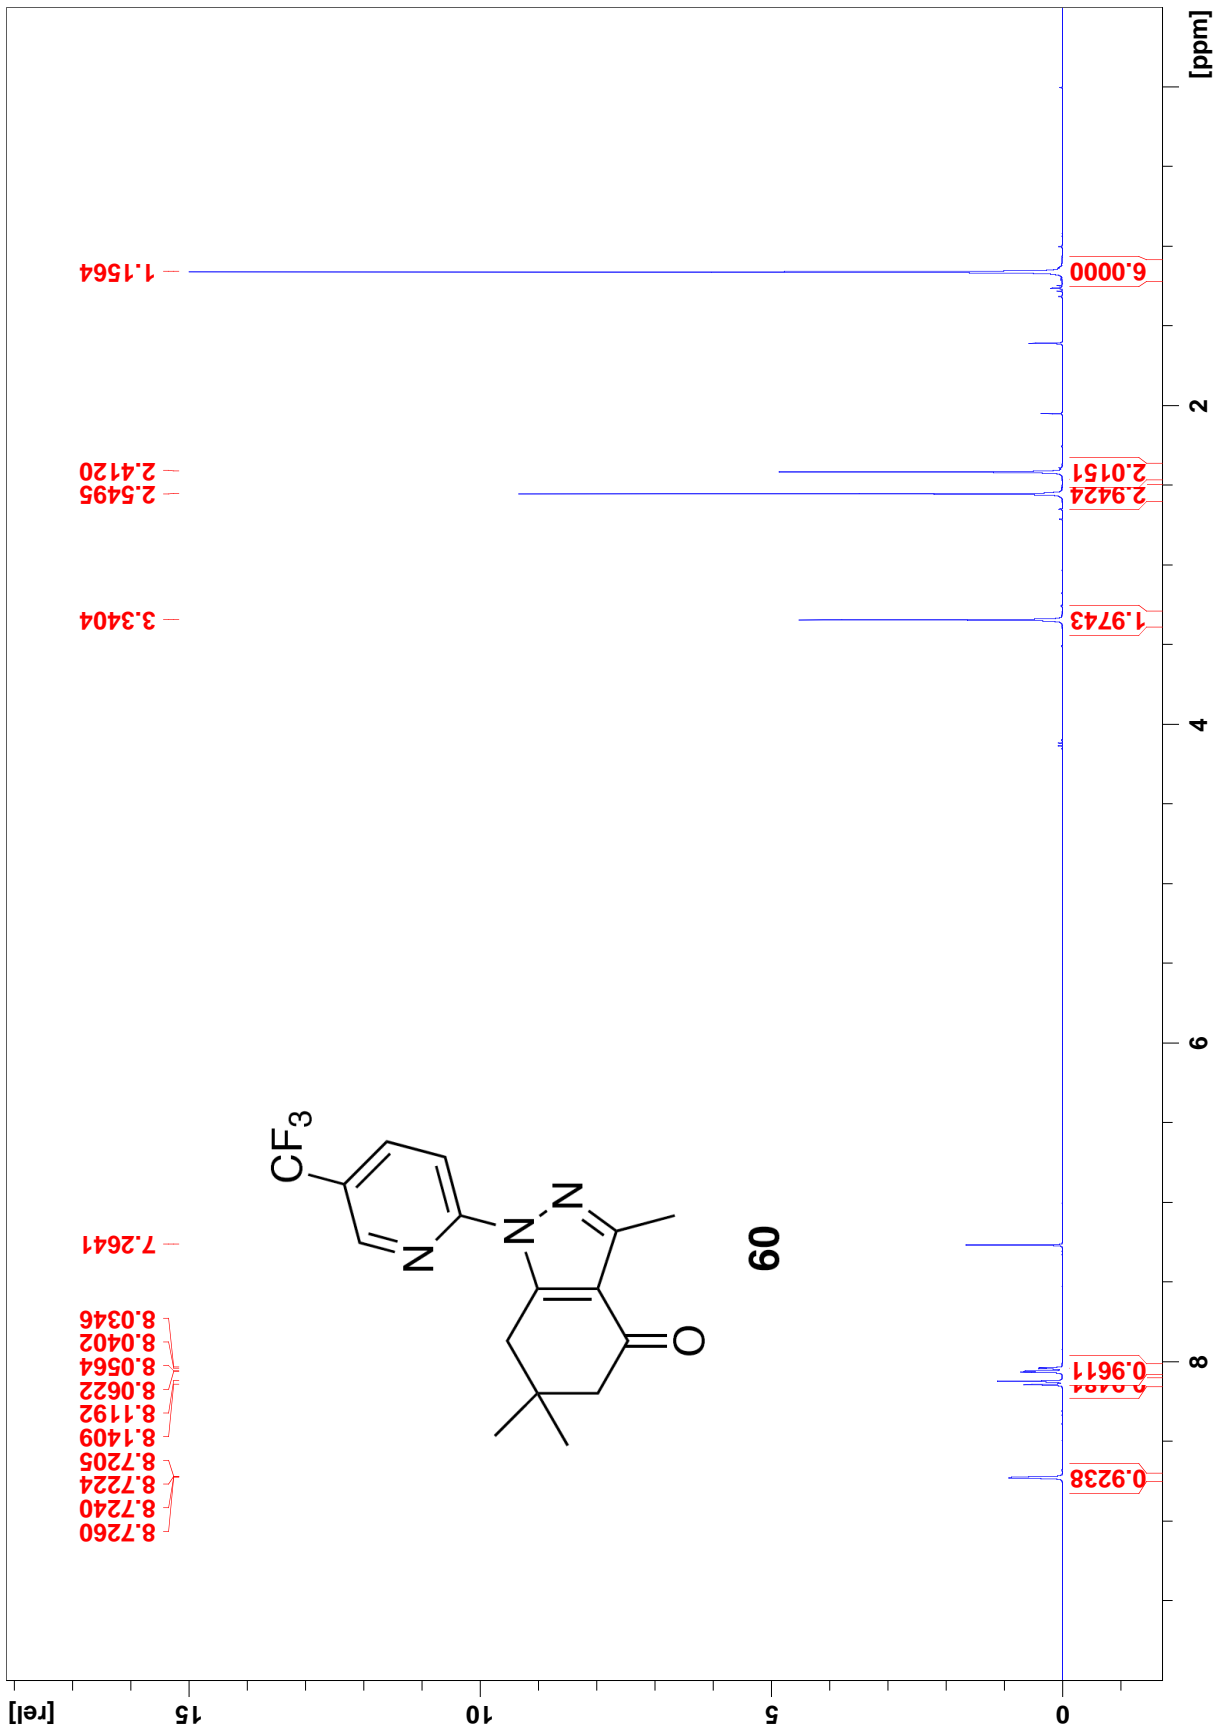



# 13C-NMR

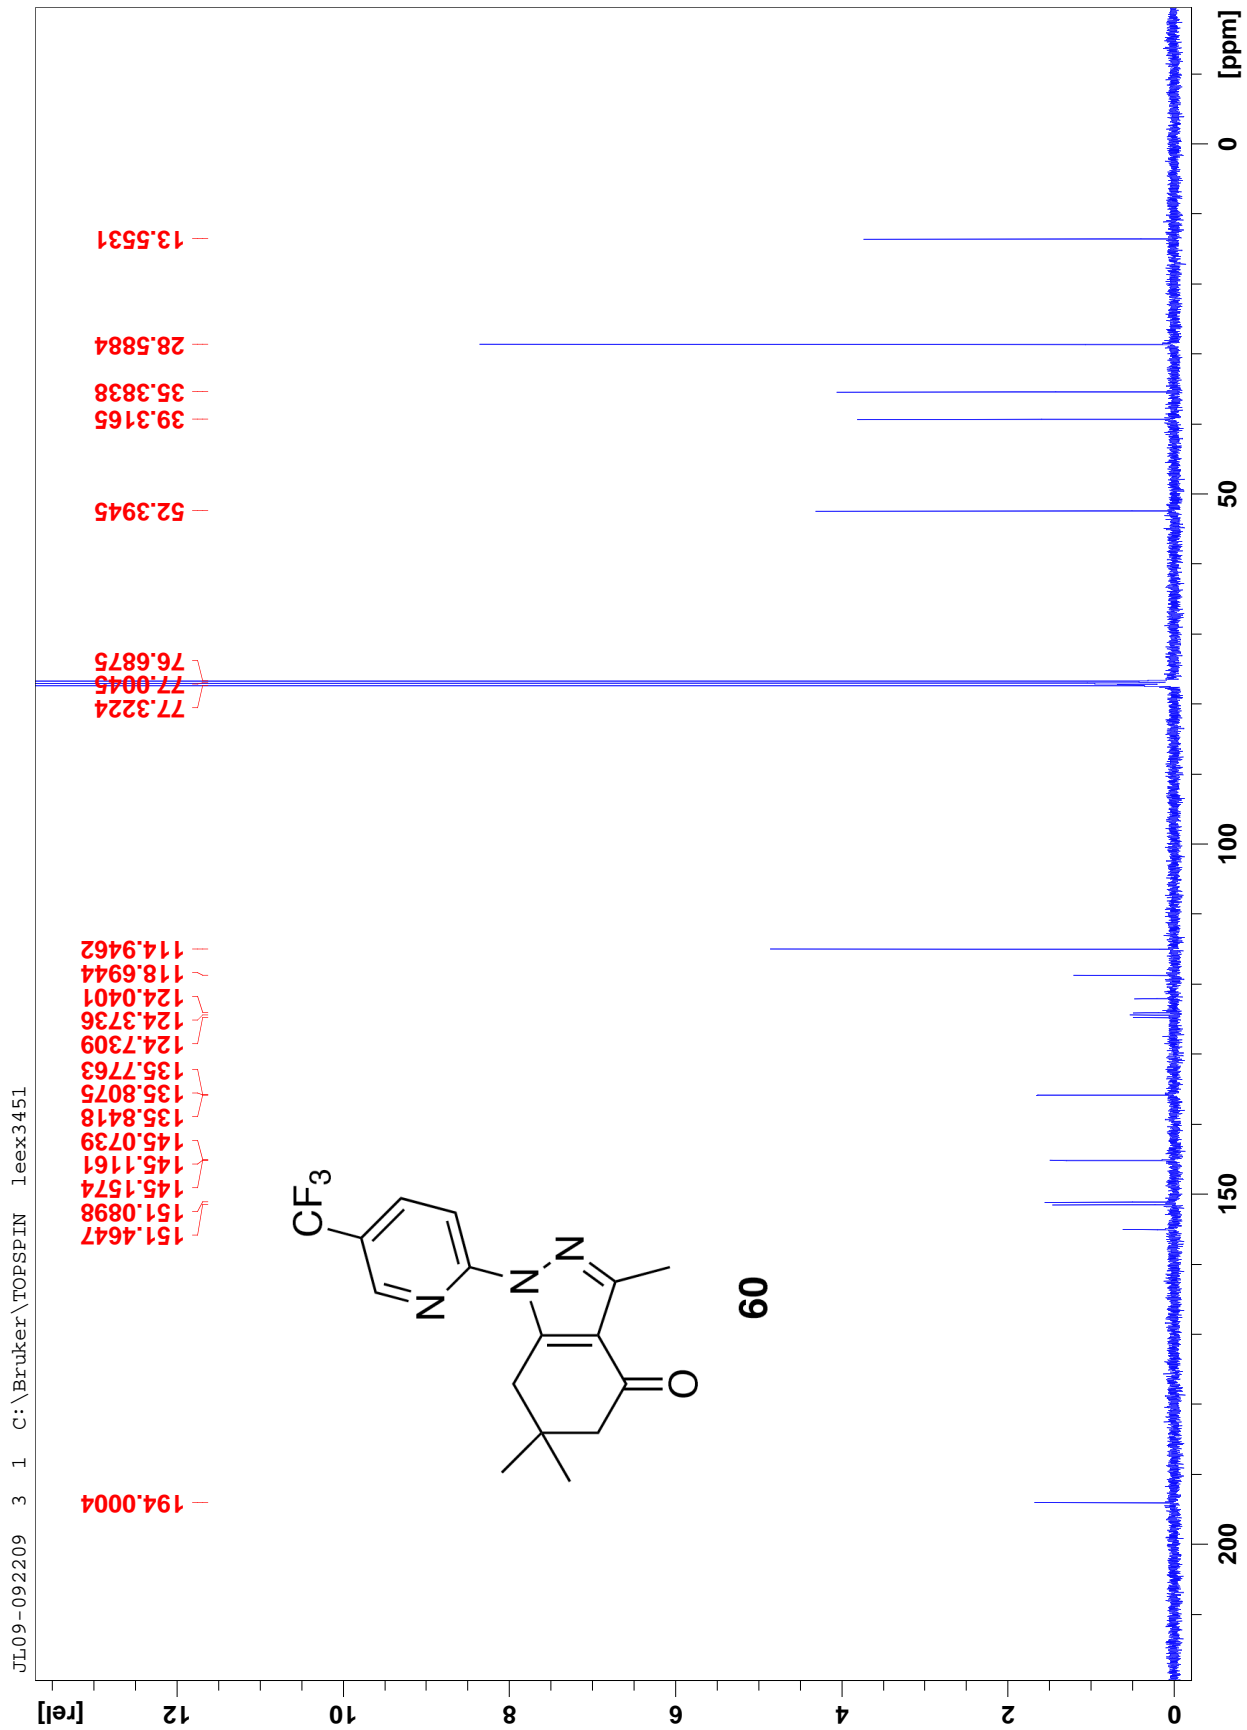

# 1H-NMR

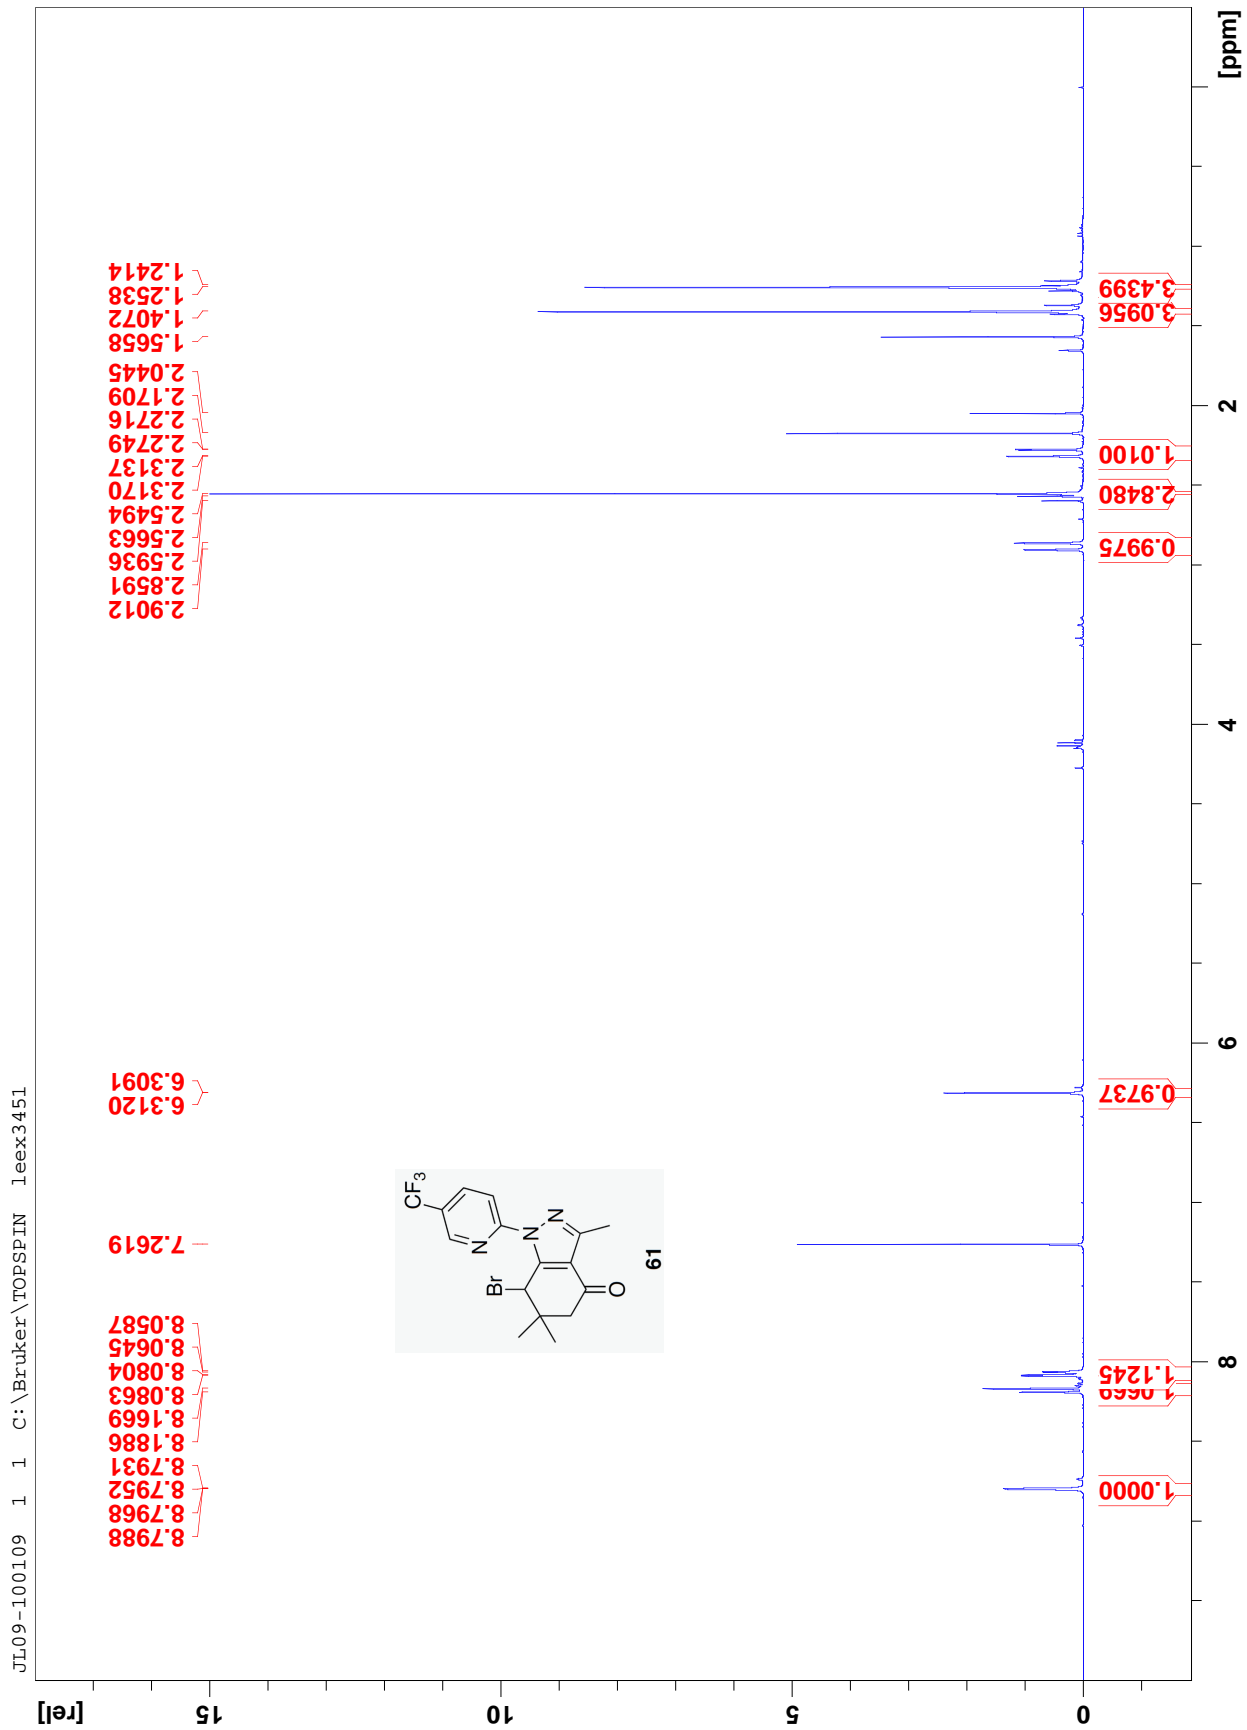

# 13C-NMR

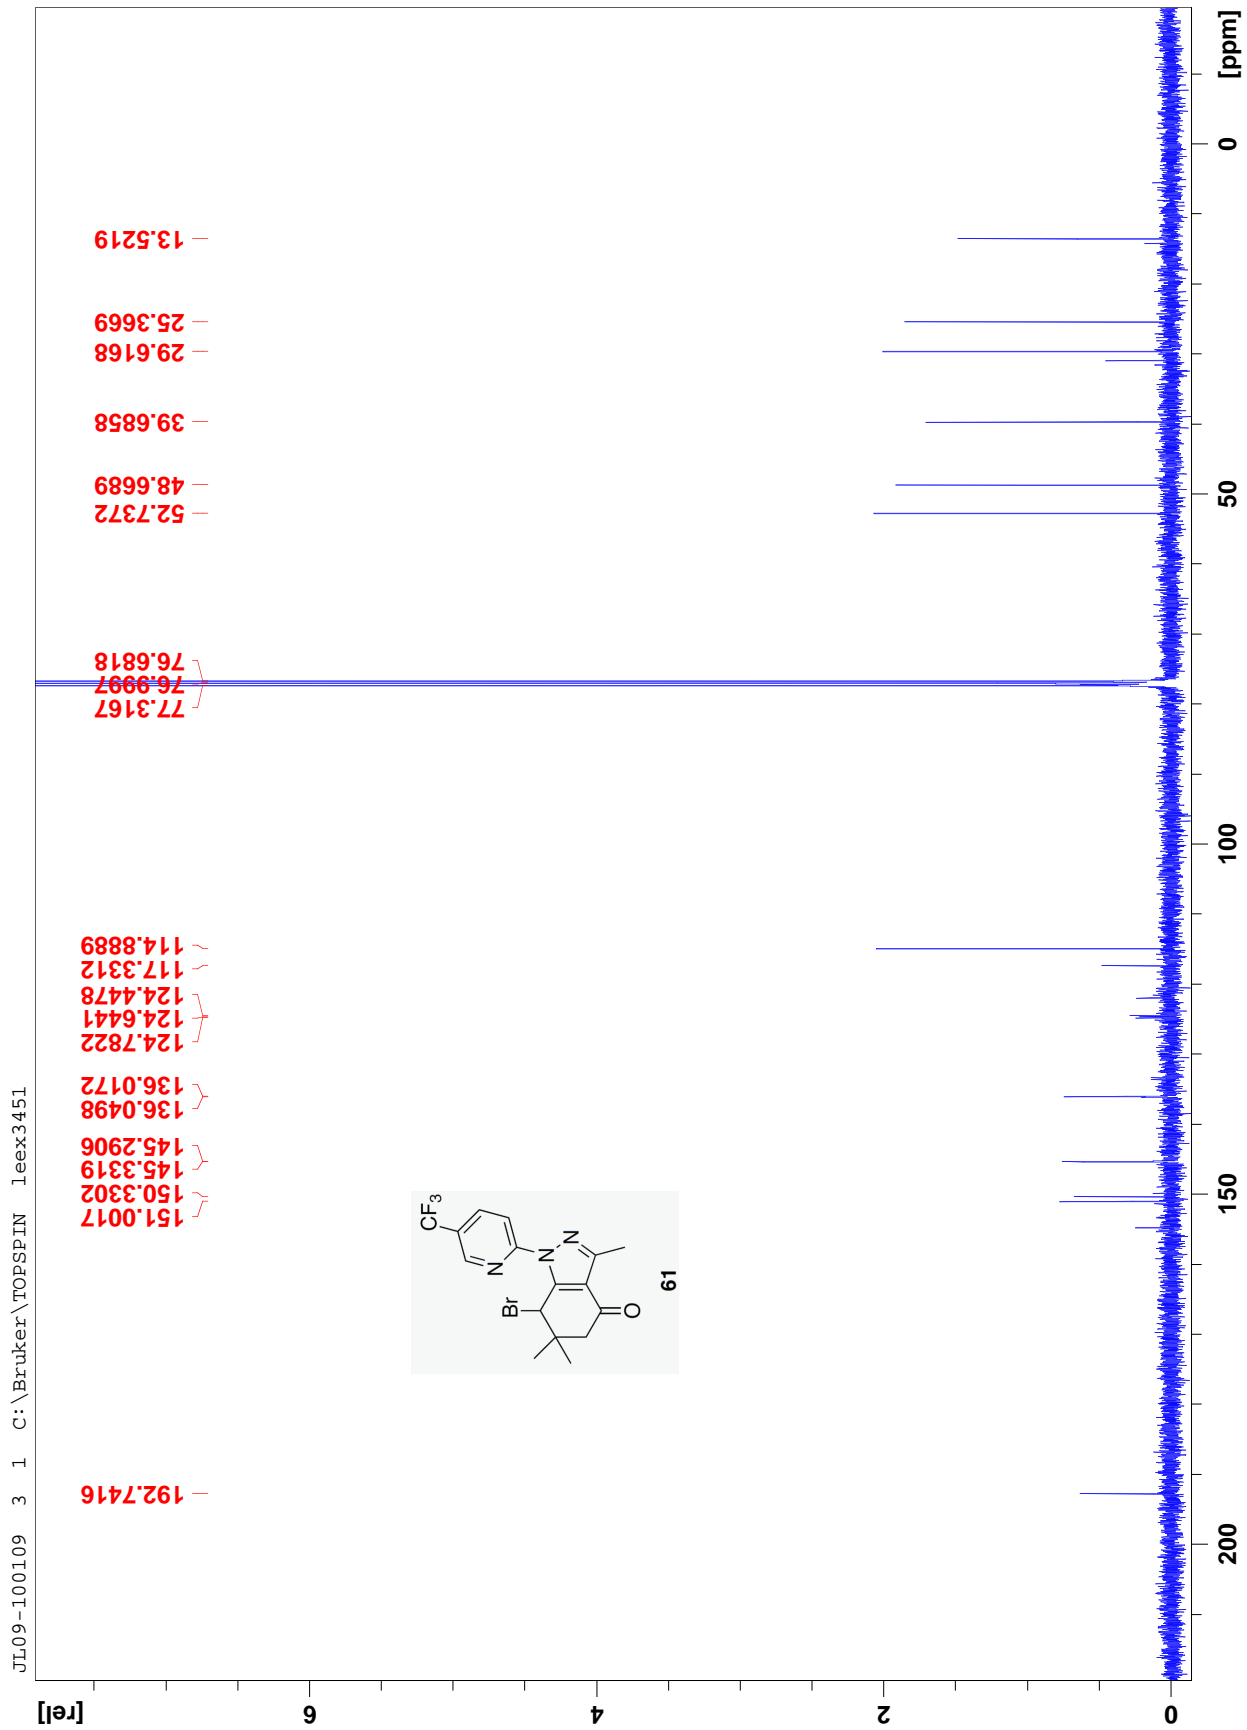

# 1H-NMR

JL09-083109C 1 1 C:\Bruker\TOPSPIN leex3451

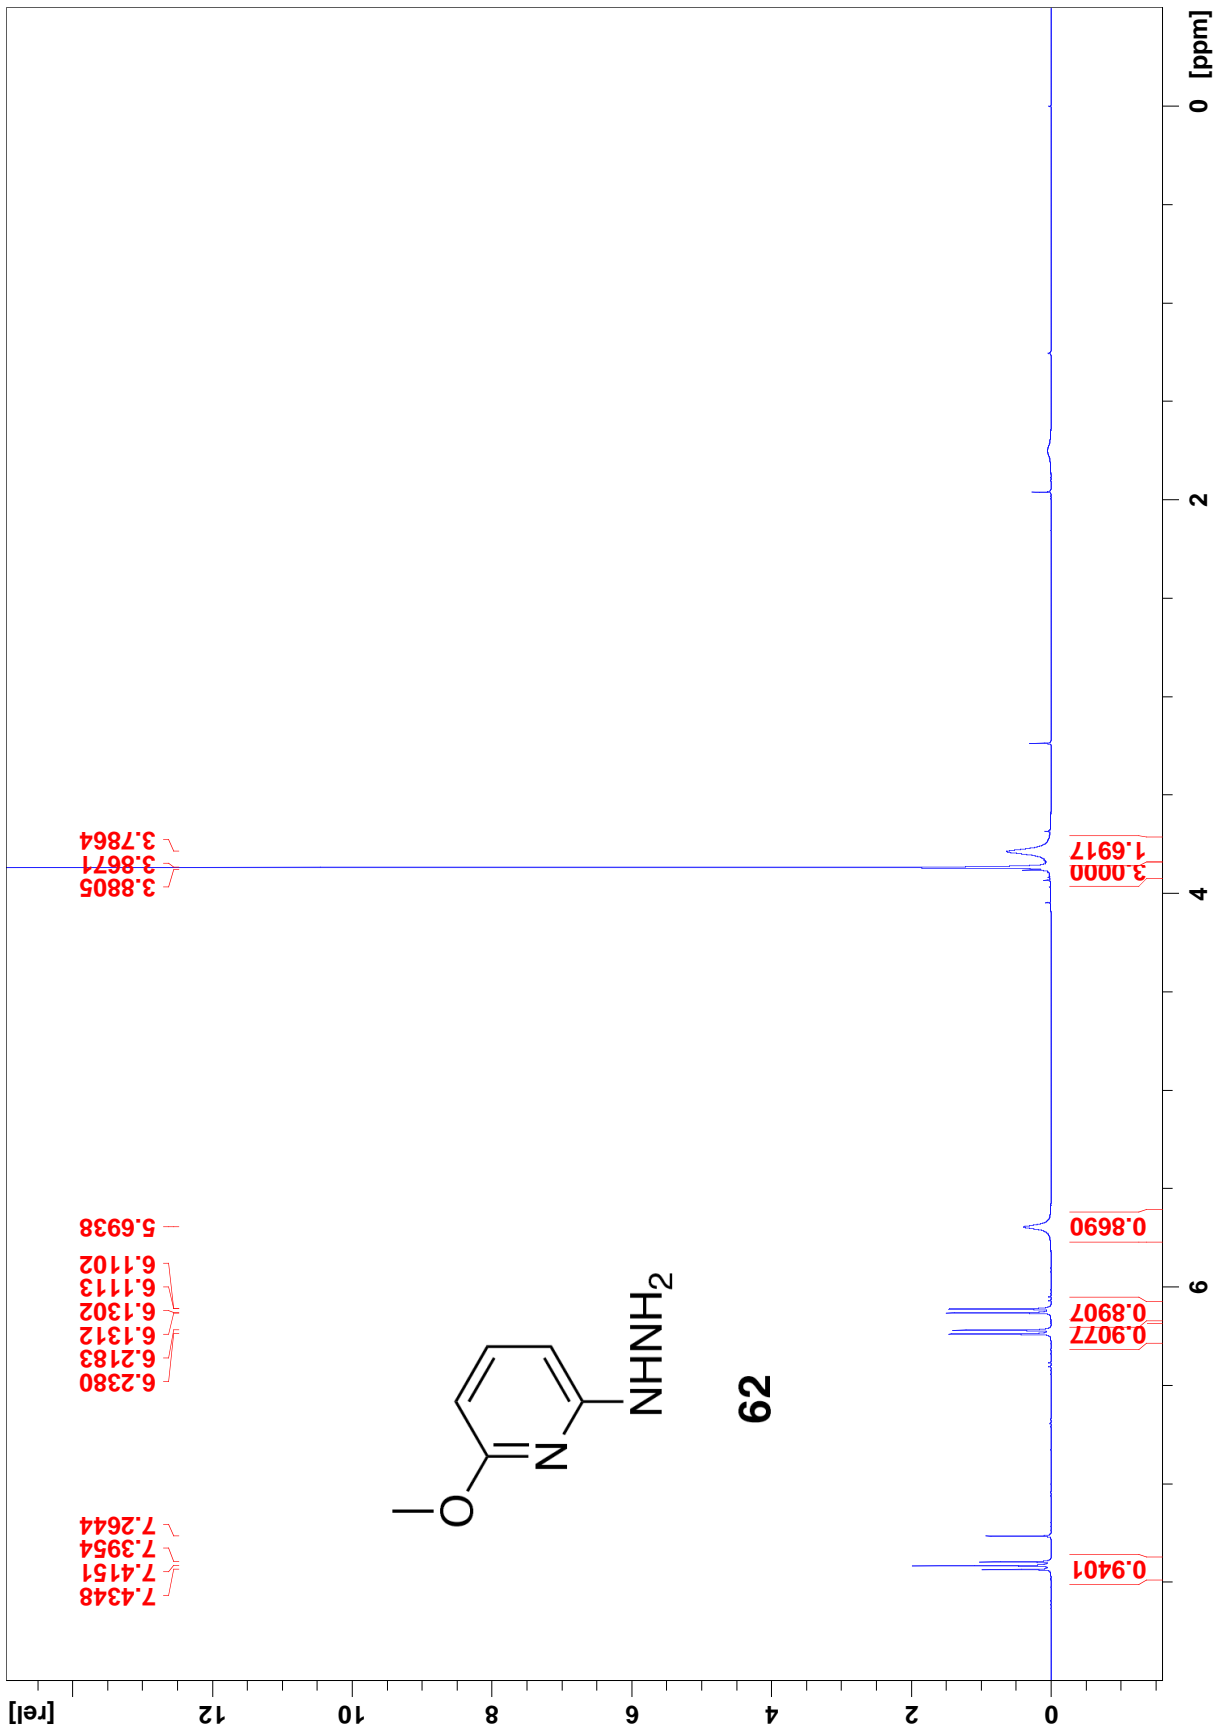

# 13C-NMR

JL09-083109C 4 1 C:\Bruker\TOPSPIN leex3451

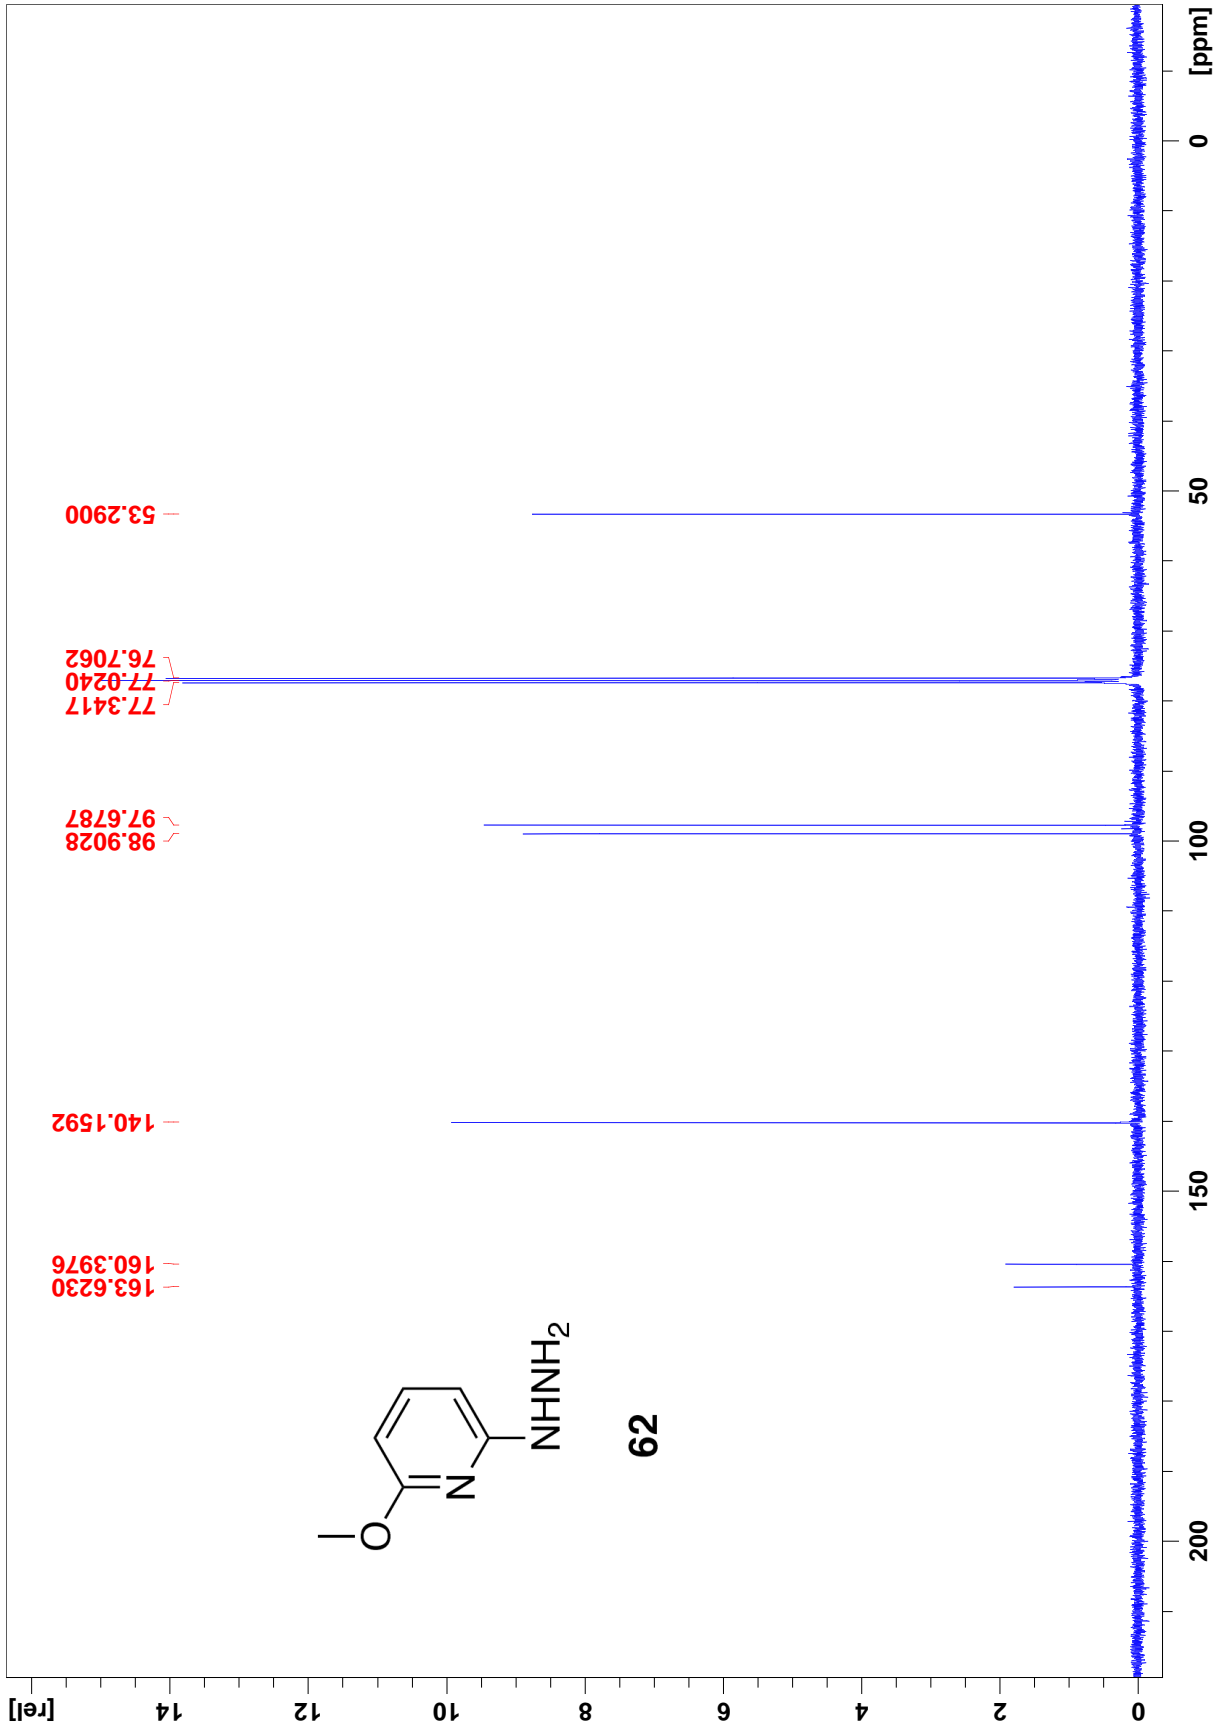

# 1H-NMR

JL09-090309B 1 1 C:\Bruker\TOPSPIN leex3451

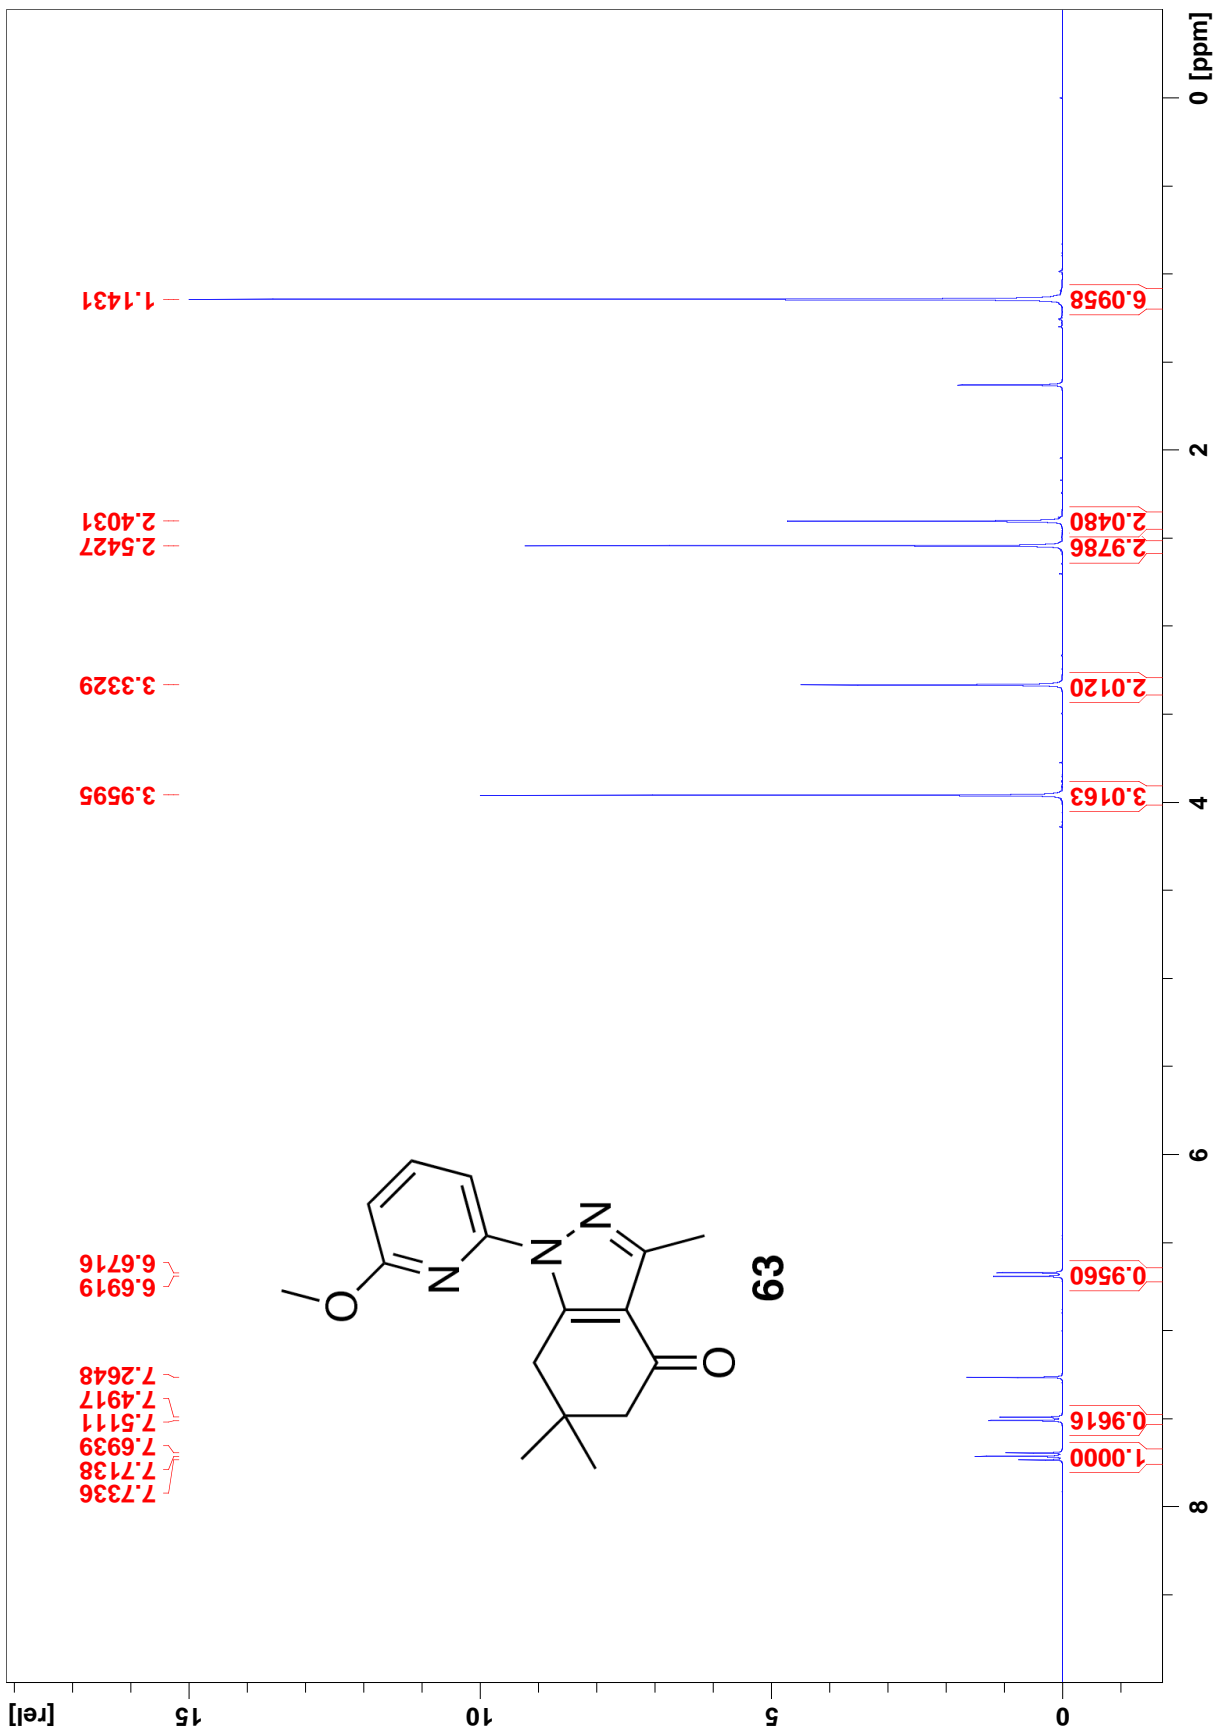

# 13C-NMR

JL09-090309B 3 1 C:\Bruker\TOPSPIN leex3451

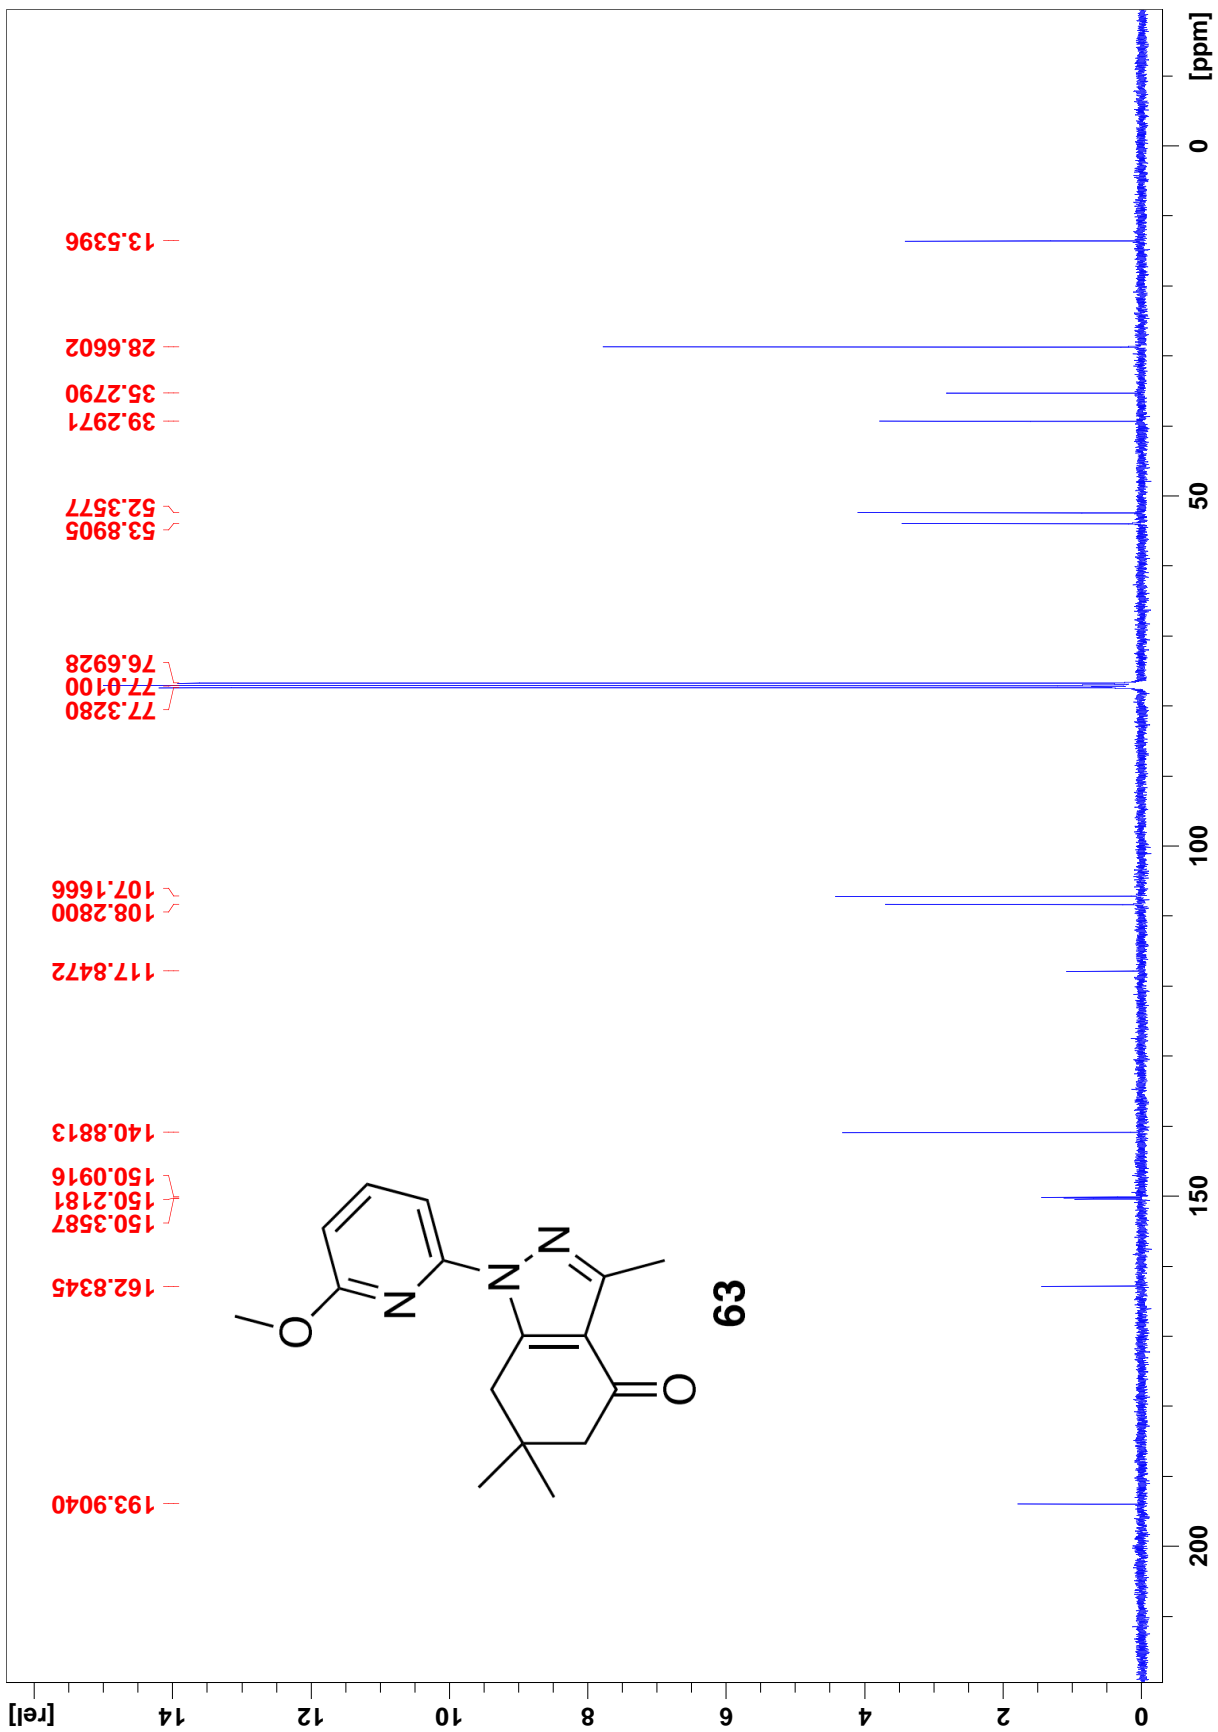





# 13C-NMR

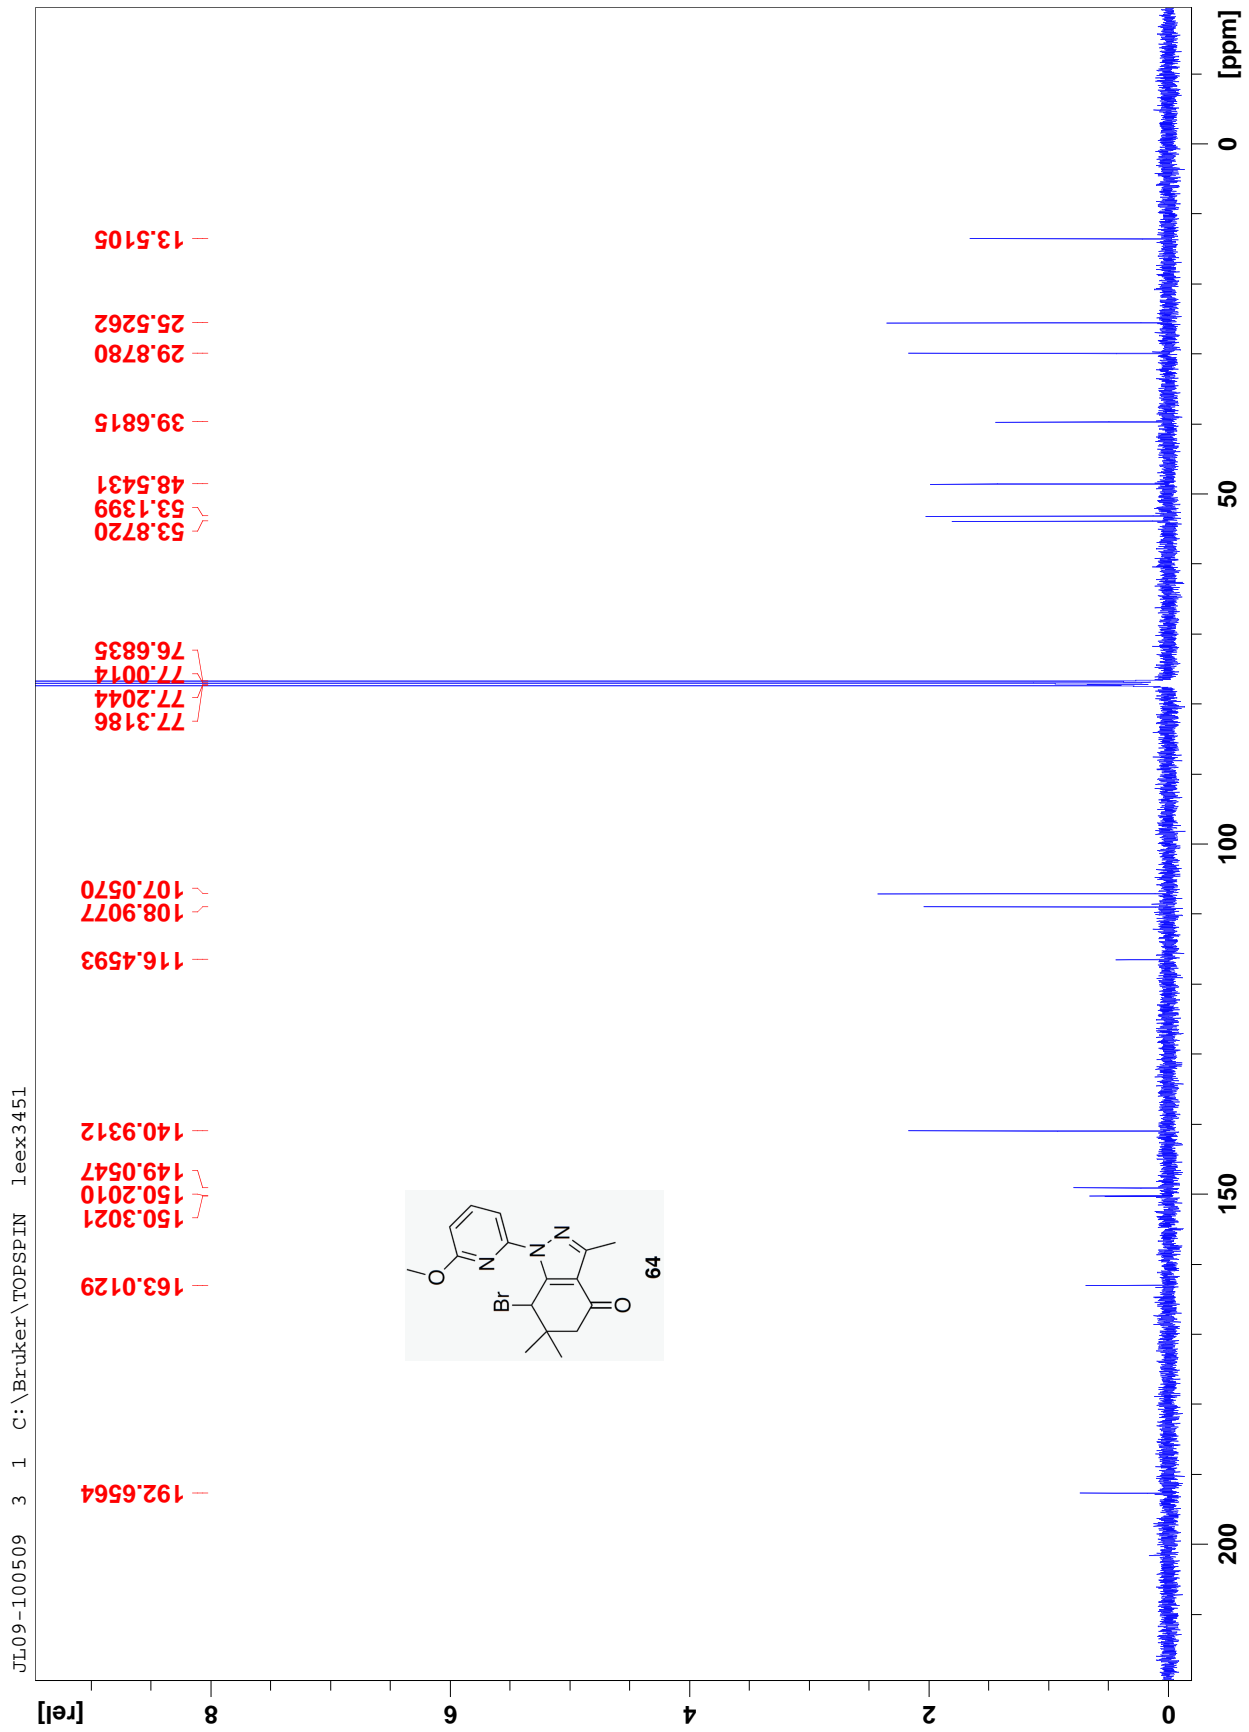

# 1H-NMR

JL09-091209A 1 1 C:\Bruker\TOPSPIN leex3451

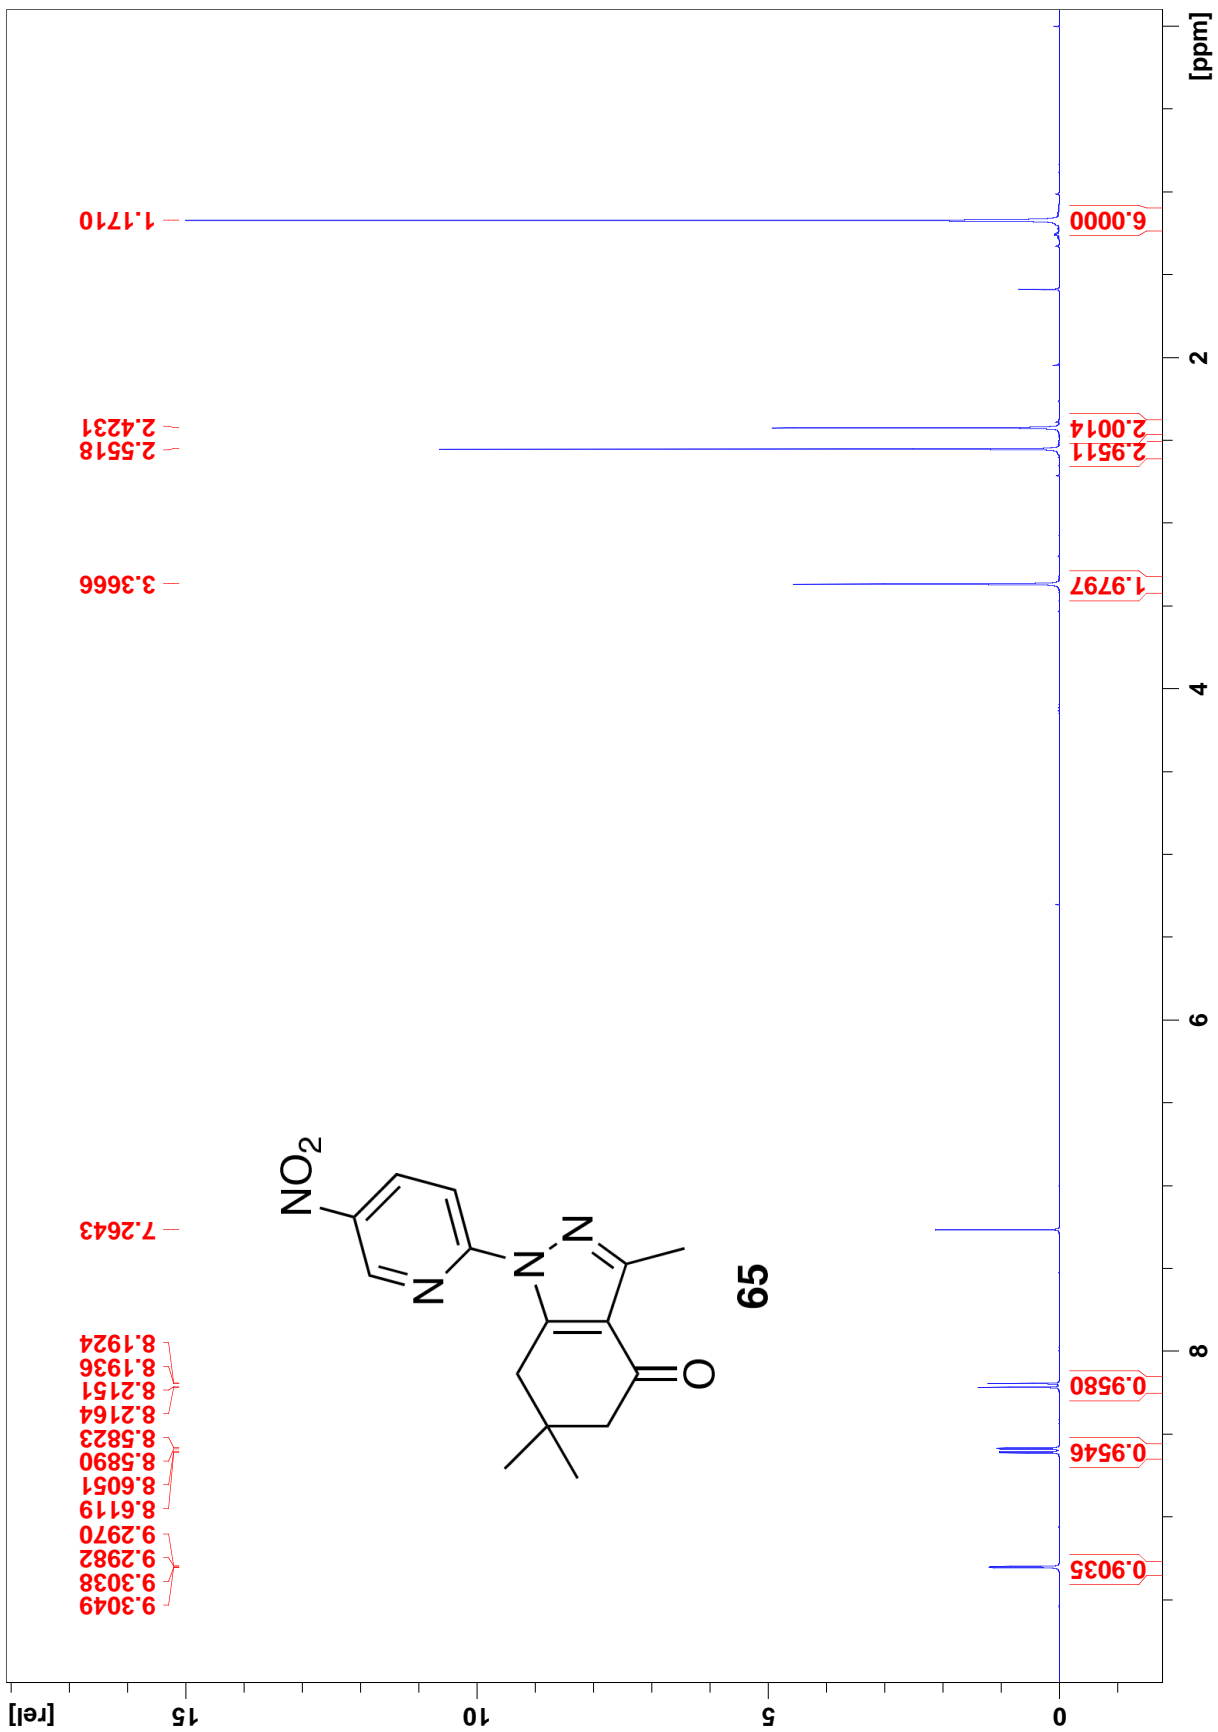

# 13C-NMR

JL09-091209A 3 1 C:\Bruker\TOPSPIN leex3451

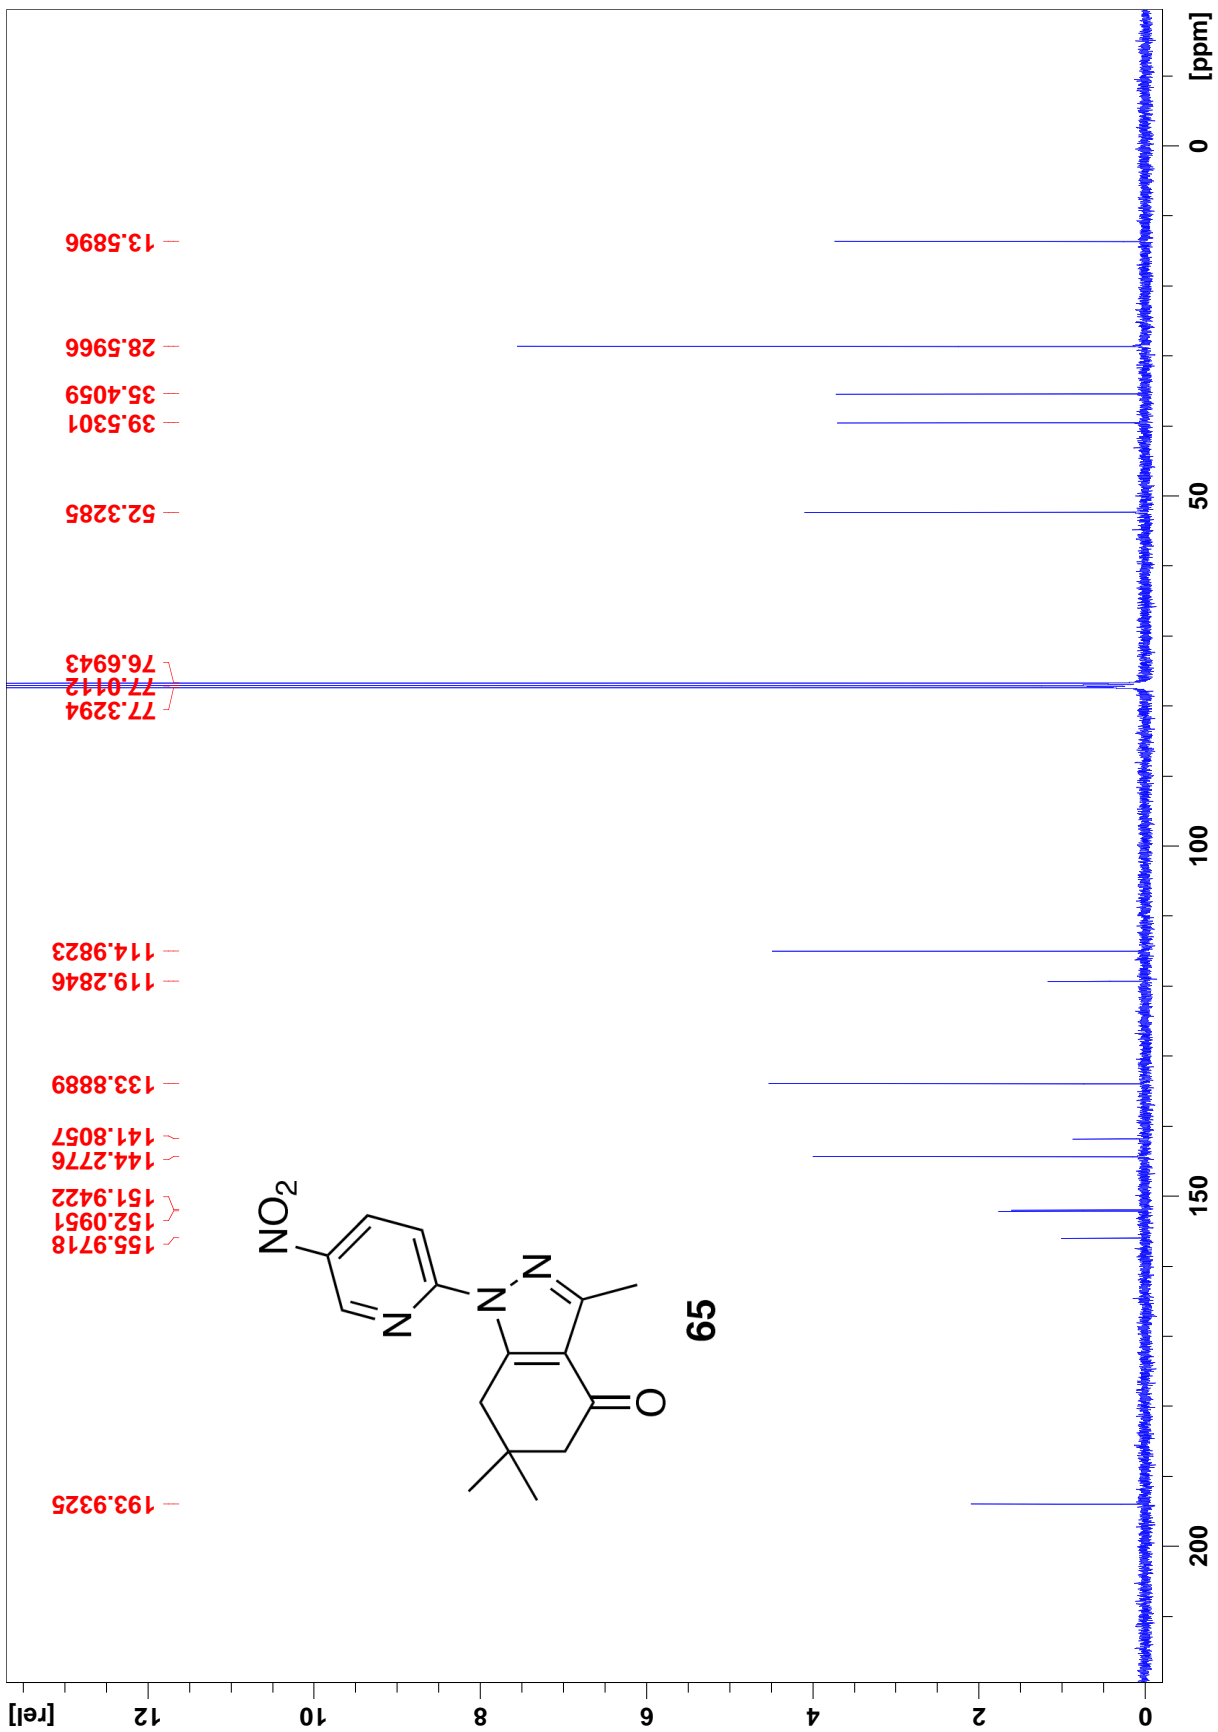

# 1H-NMR

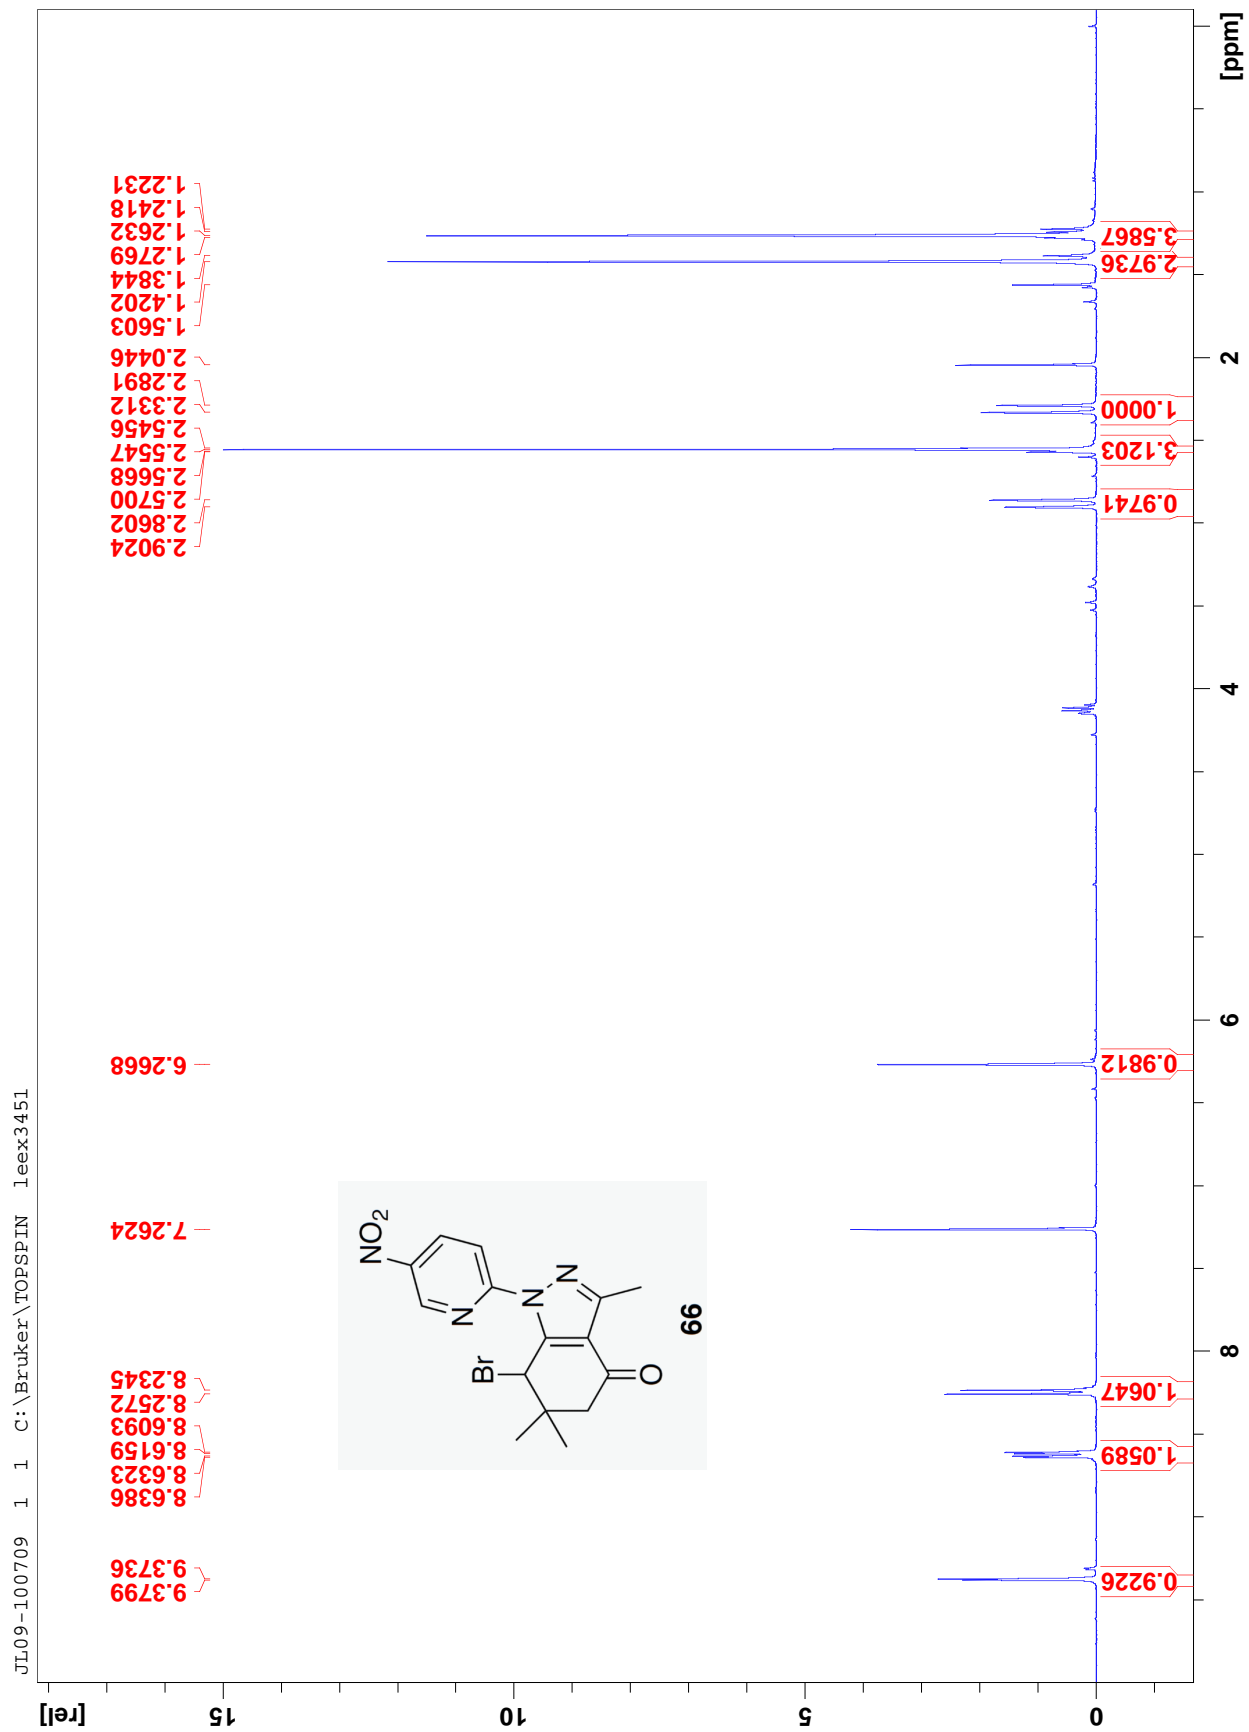

# 13C-NMR

JL09-100709 3 1 C:\Bruker\TOPSPIN leex3451

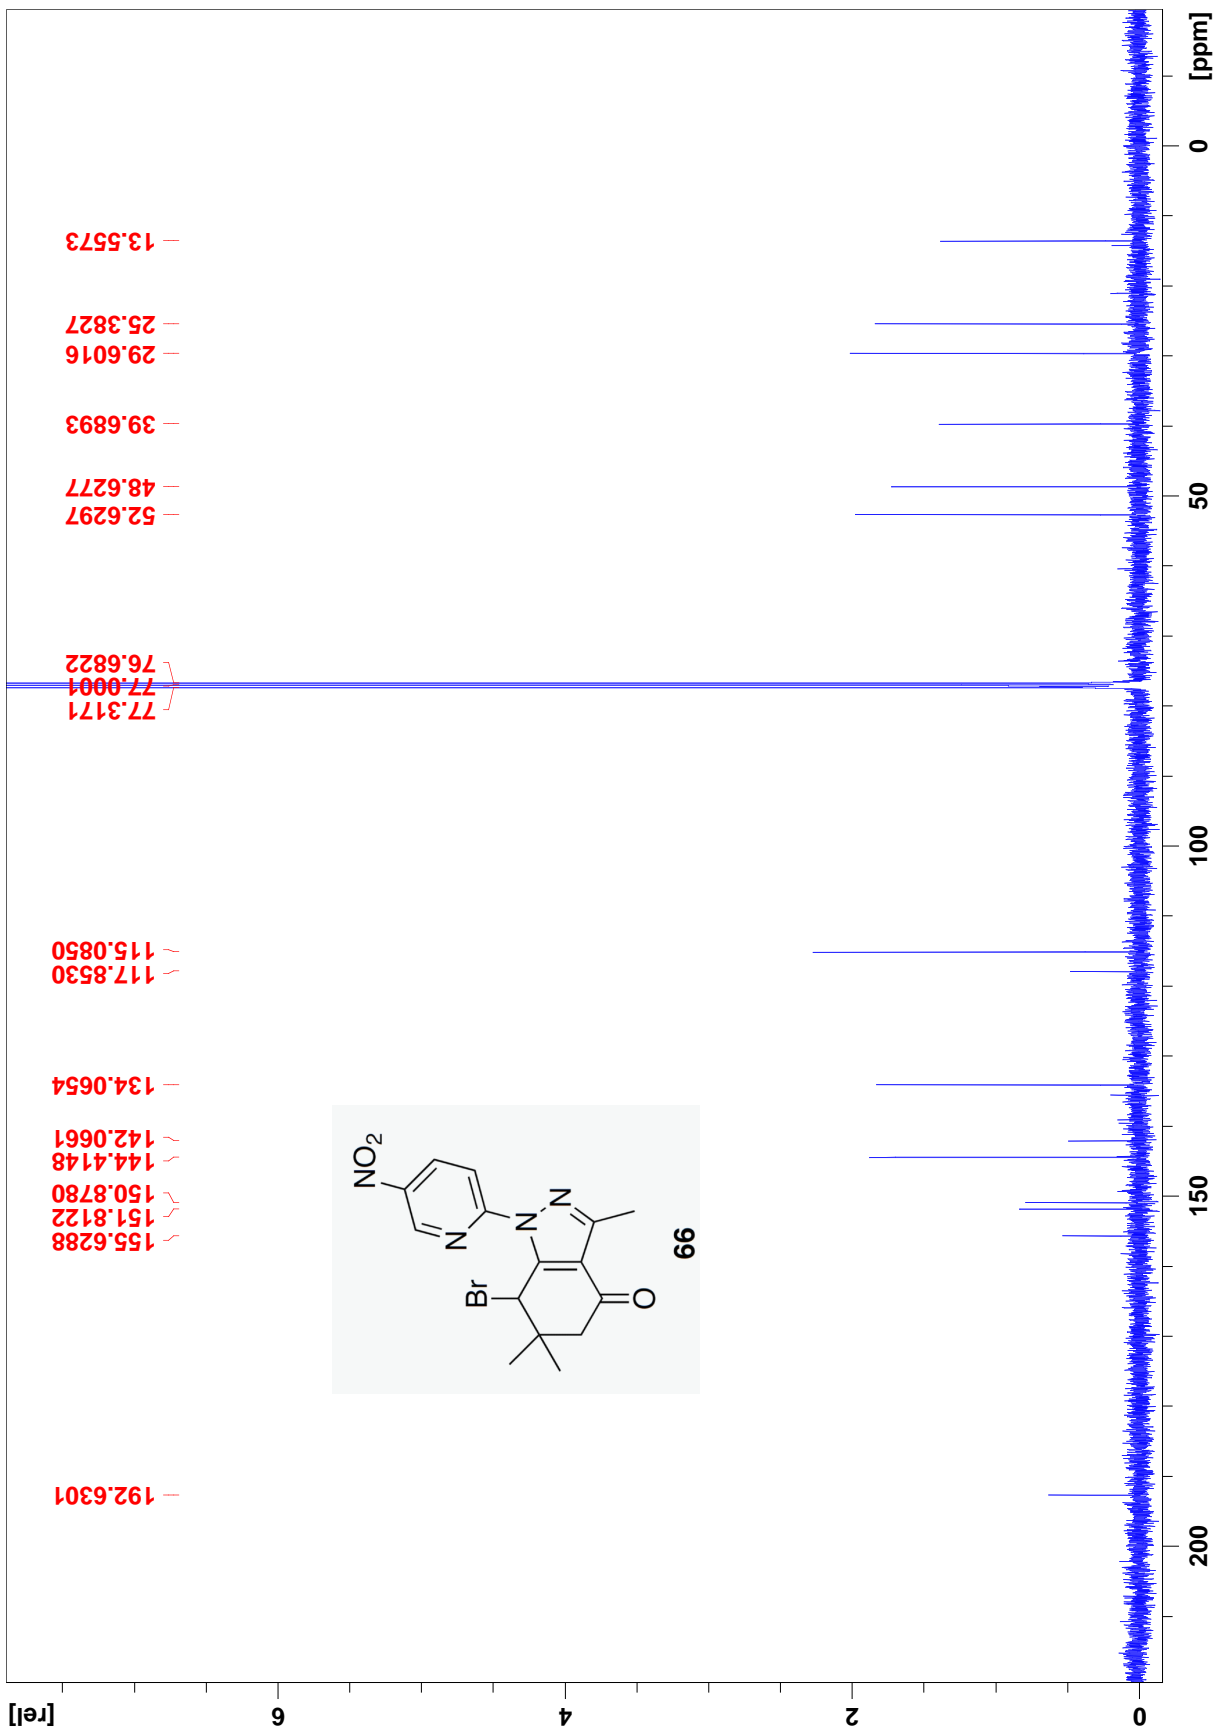

# 1H-NMR

JL09-102309 1 1 C:\Bruker\TOPSPIN leex3451

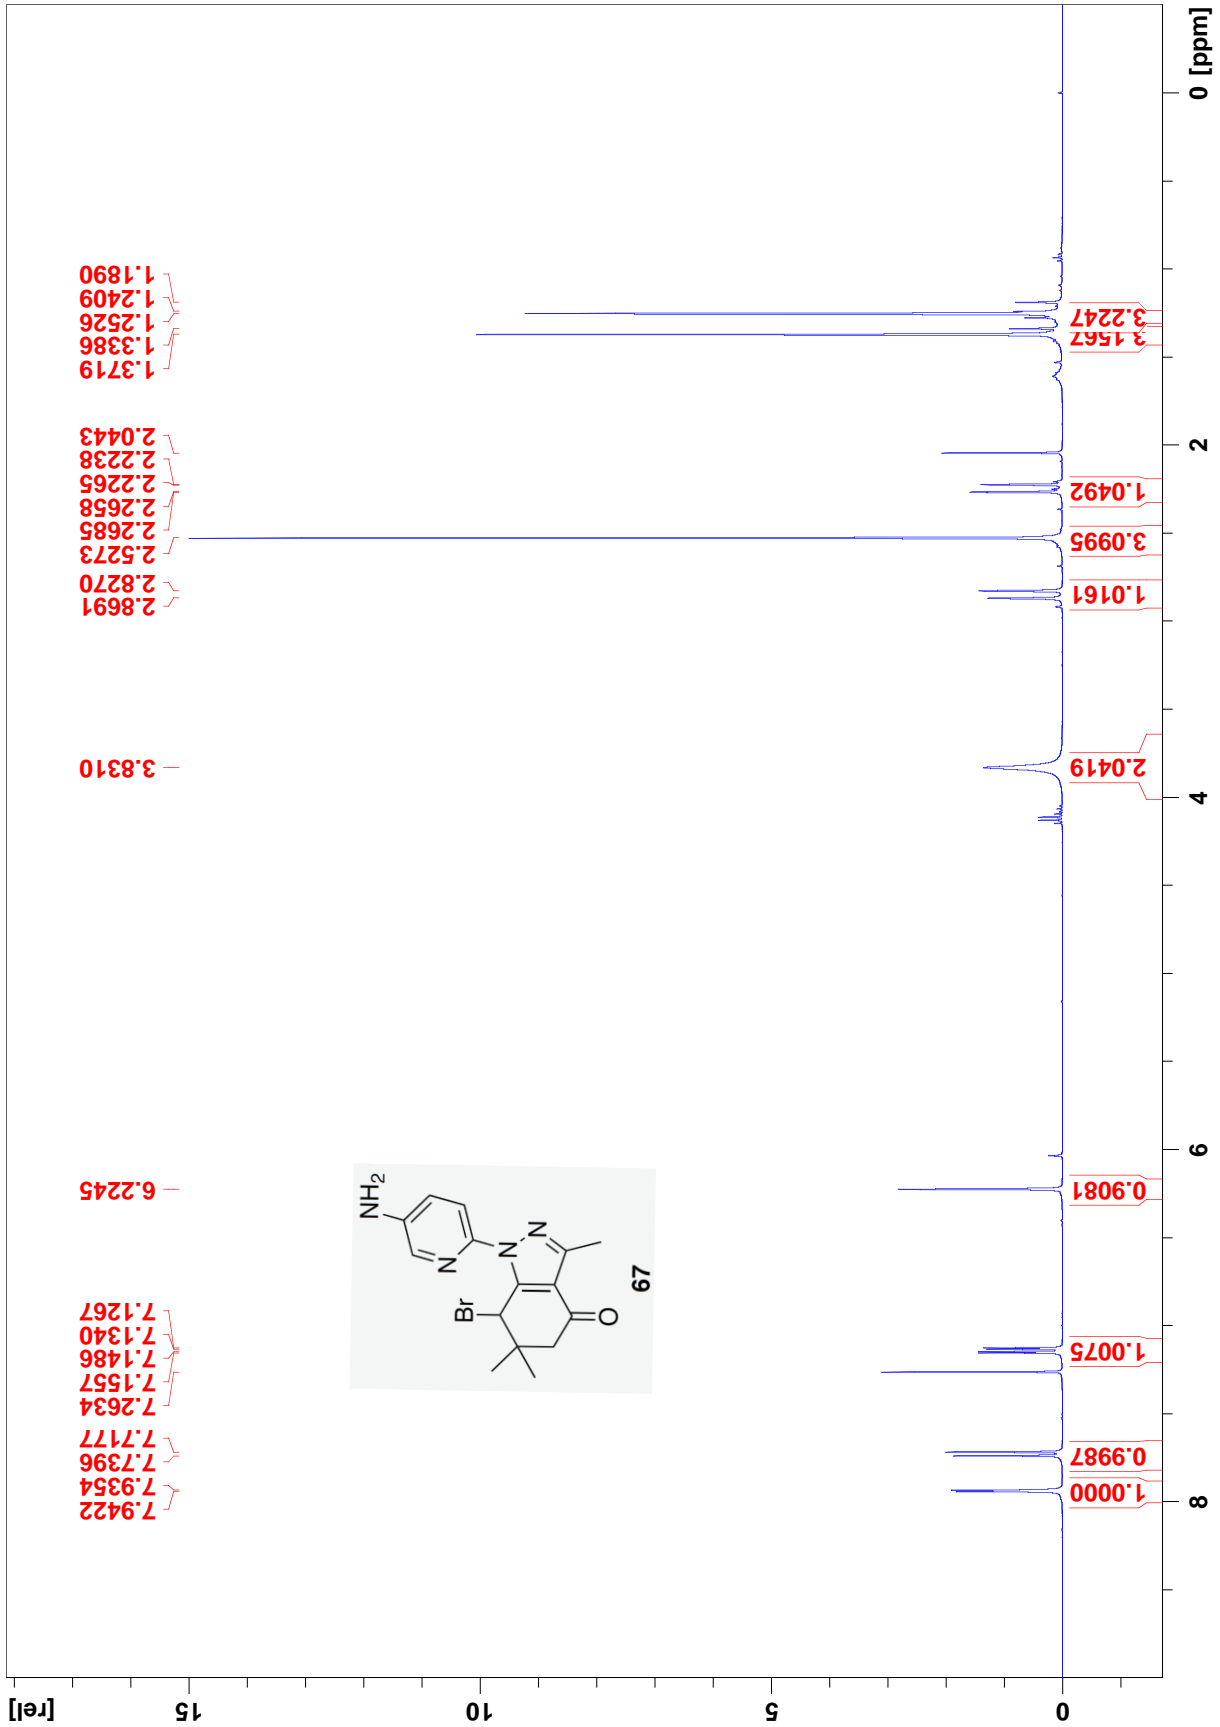

# 13C-NMR

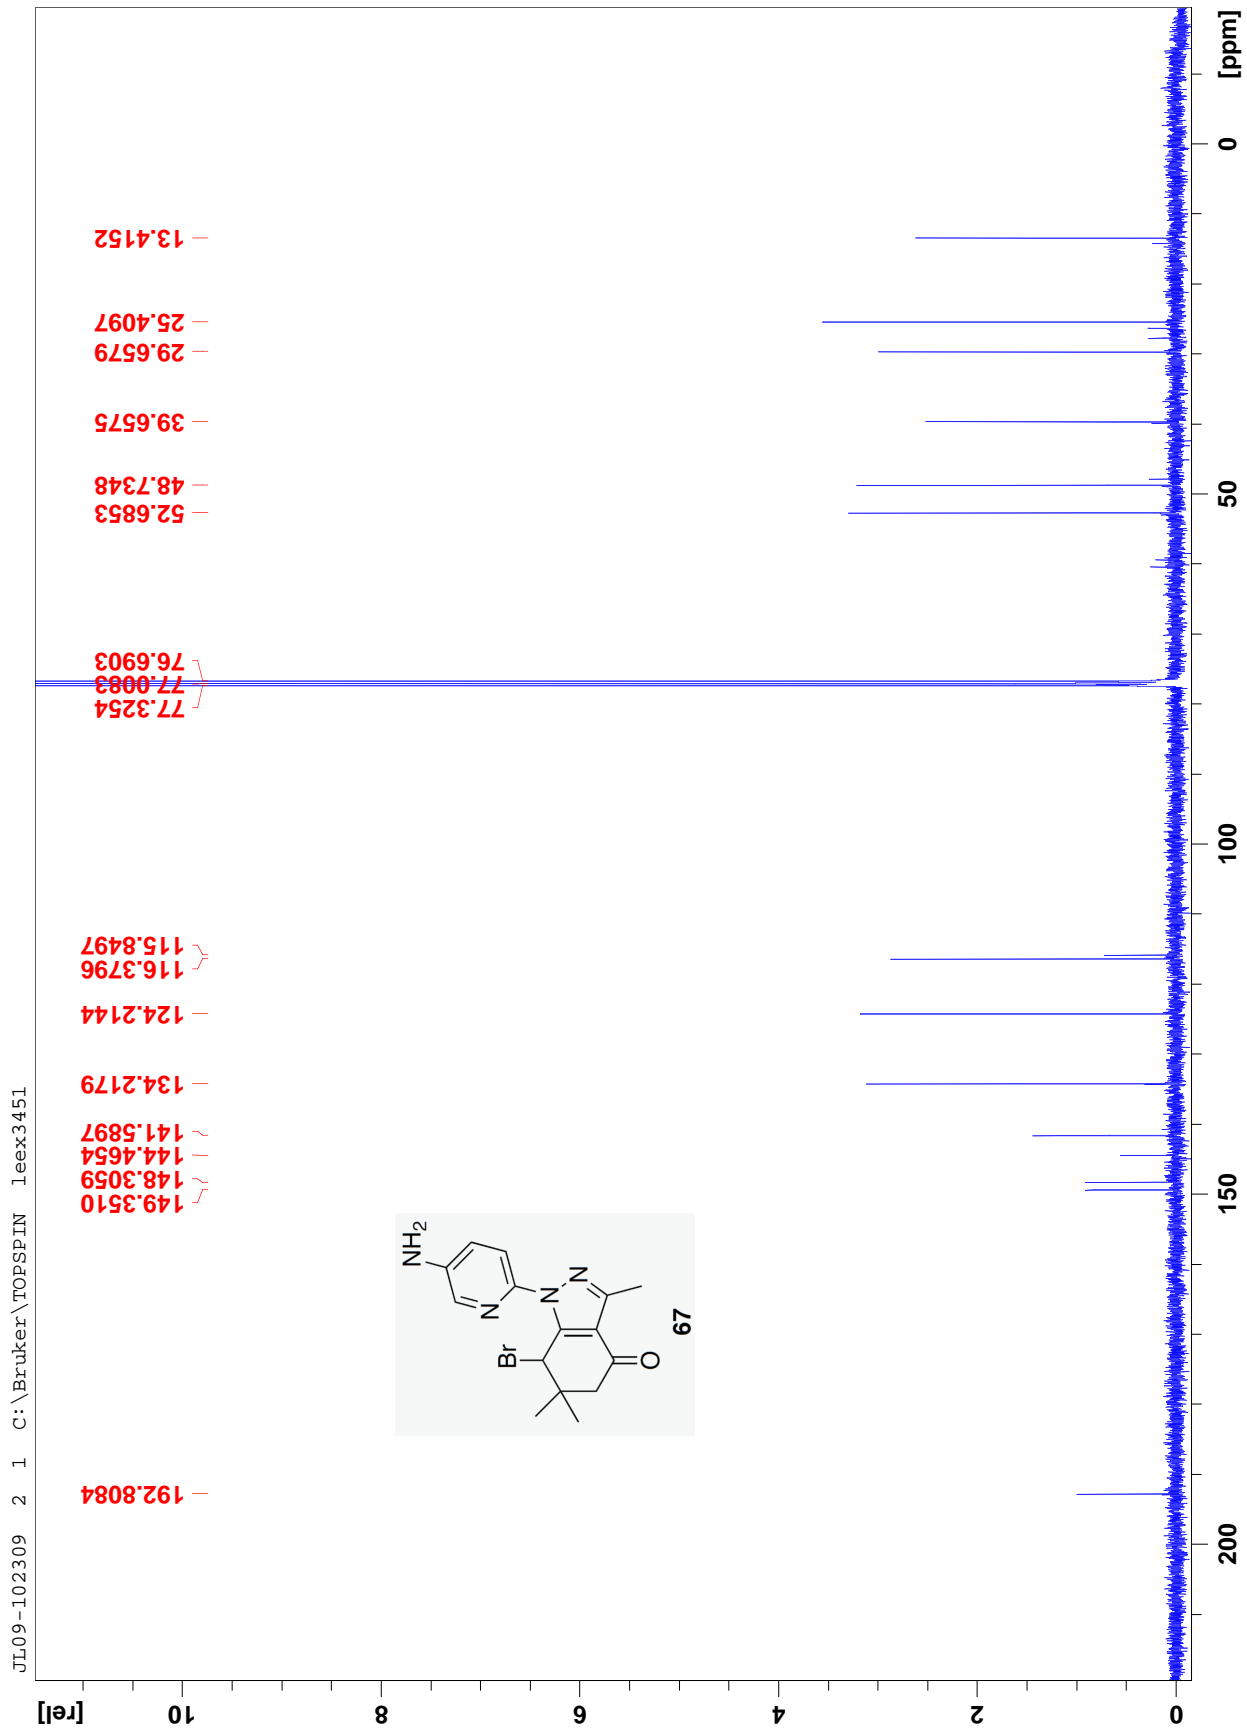

# 1H-NMR

JL09-082509 1 1 C:\Bruker\TOPSPIN leex3451

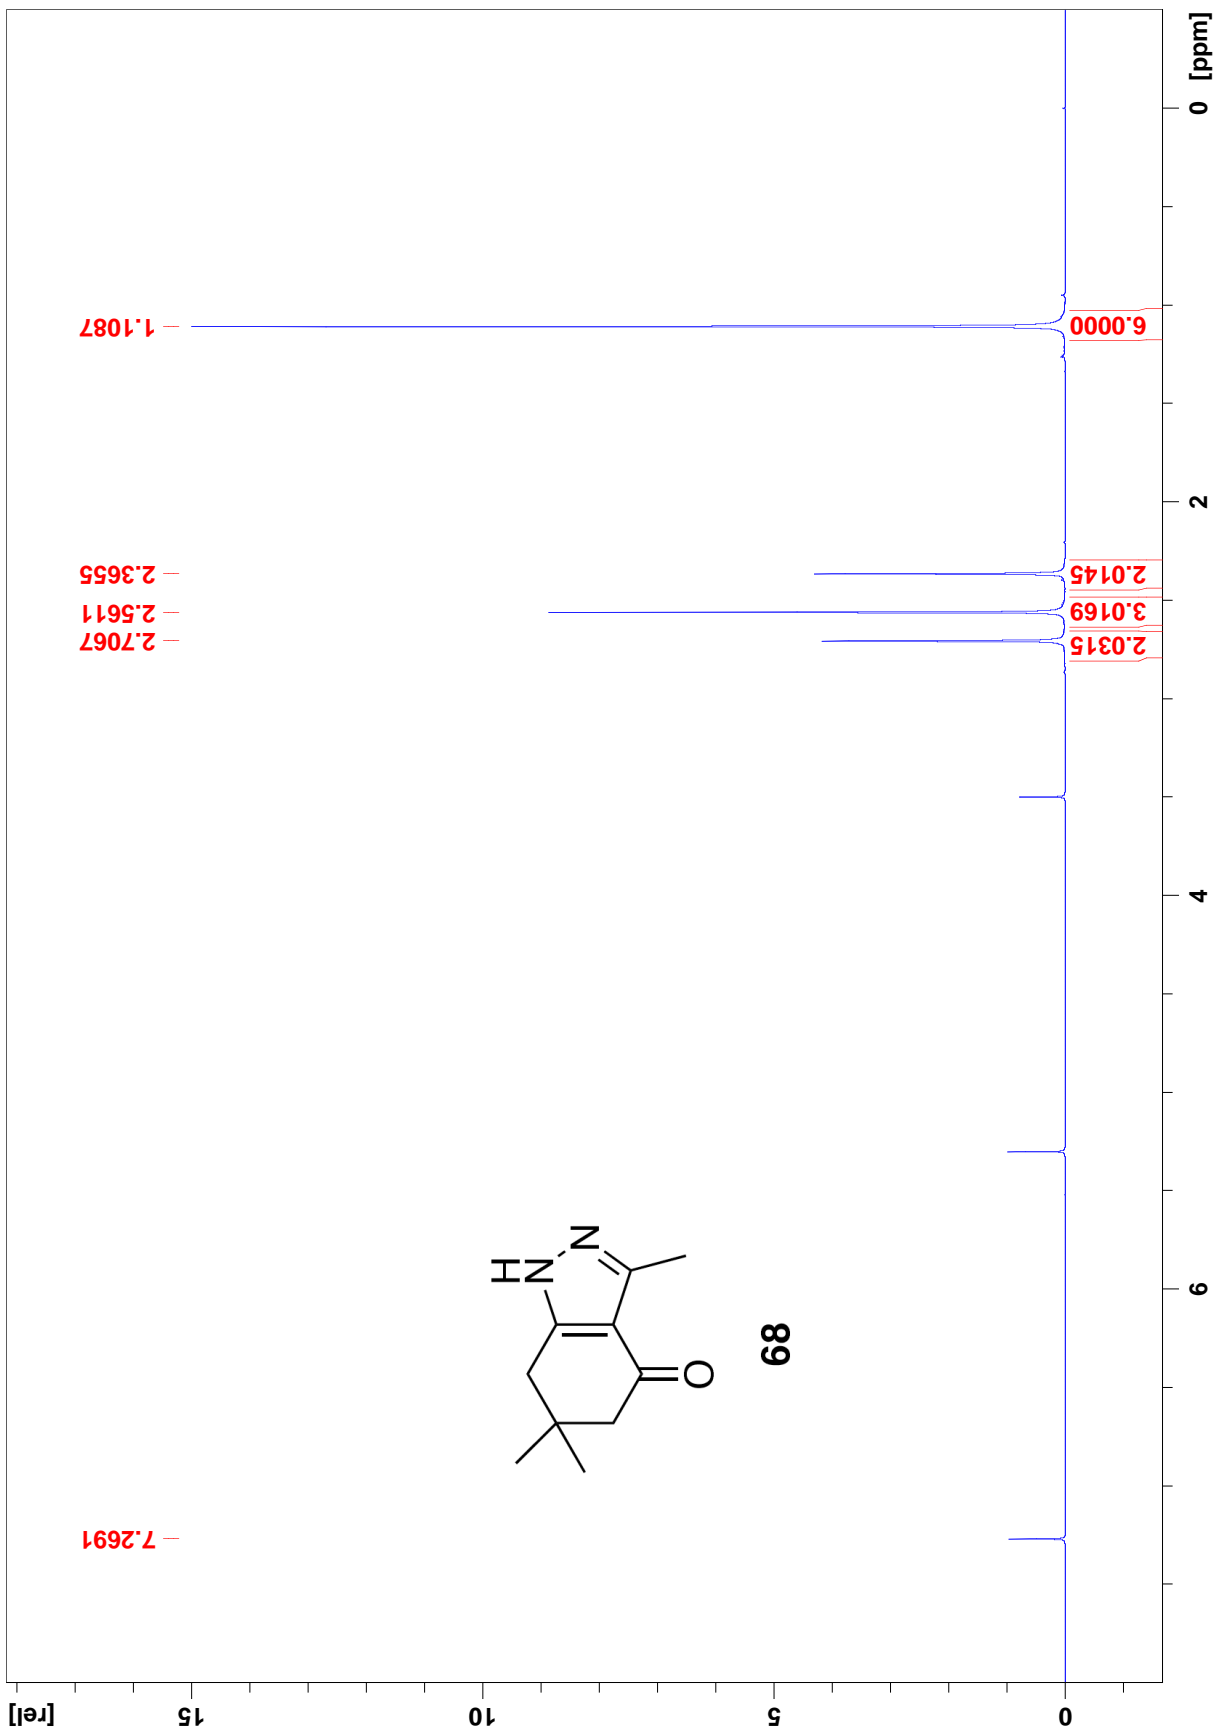



# 13C-NMR

JL09-082509 4 1 C:\Bruker\TOPSPIN leex3451

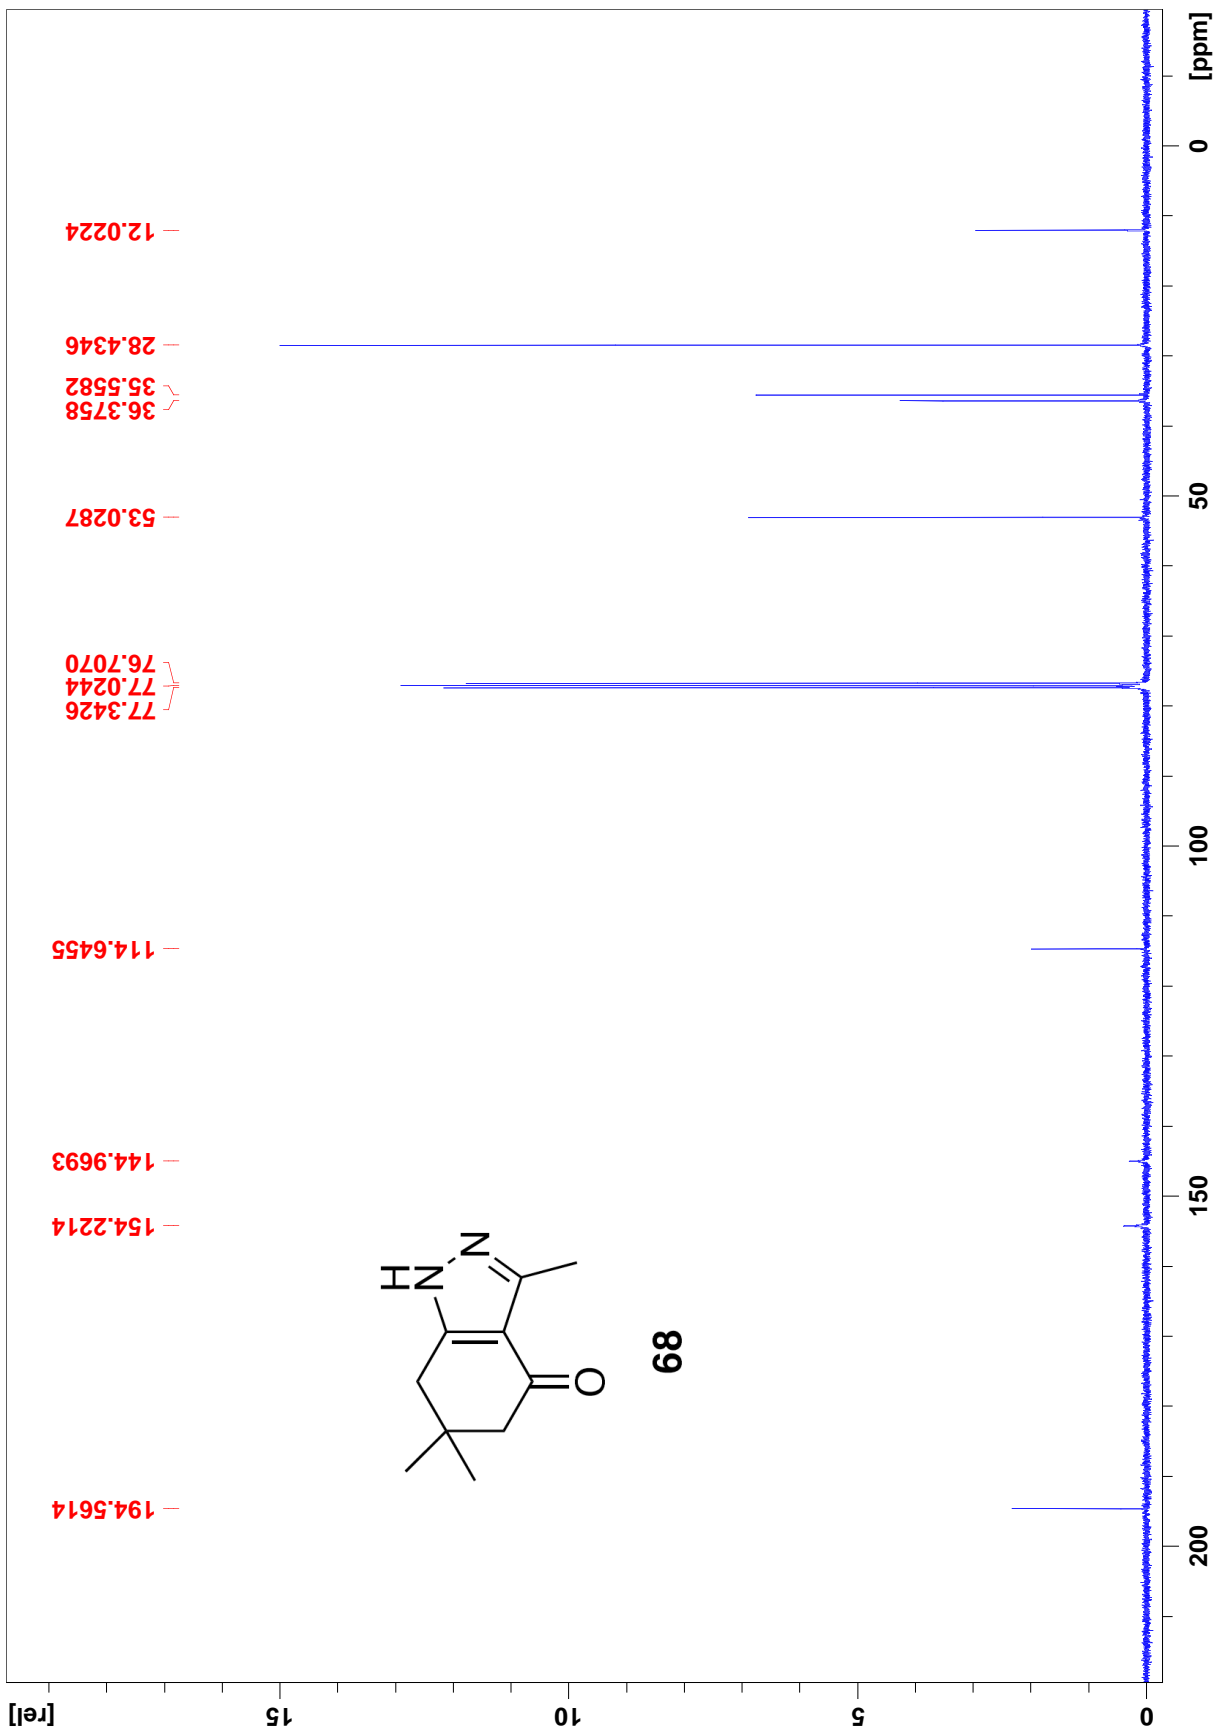

# 1H-NMR

JL09-102109A 1 1 C:\Bruker\TOPSPIN leex3451

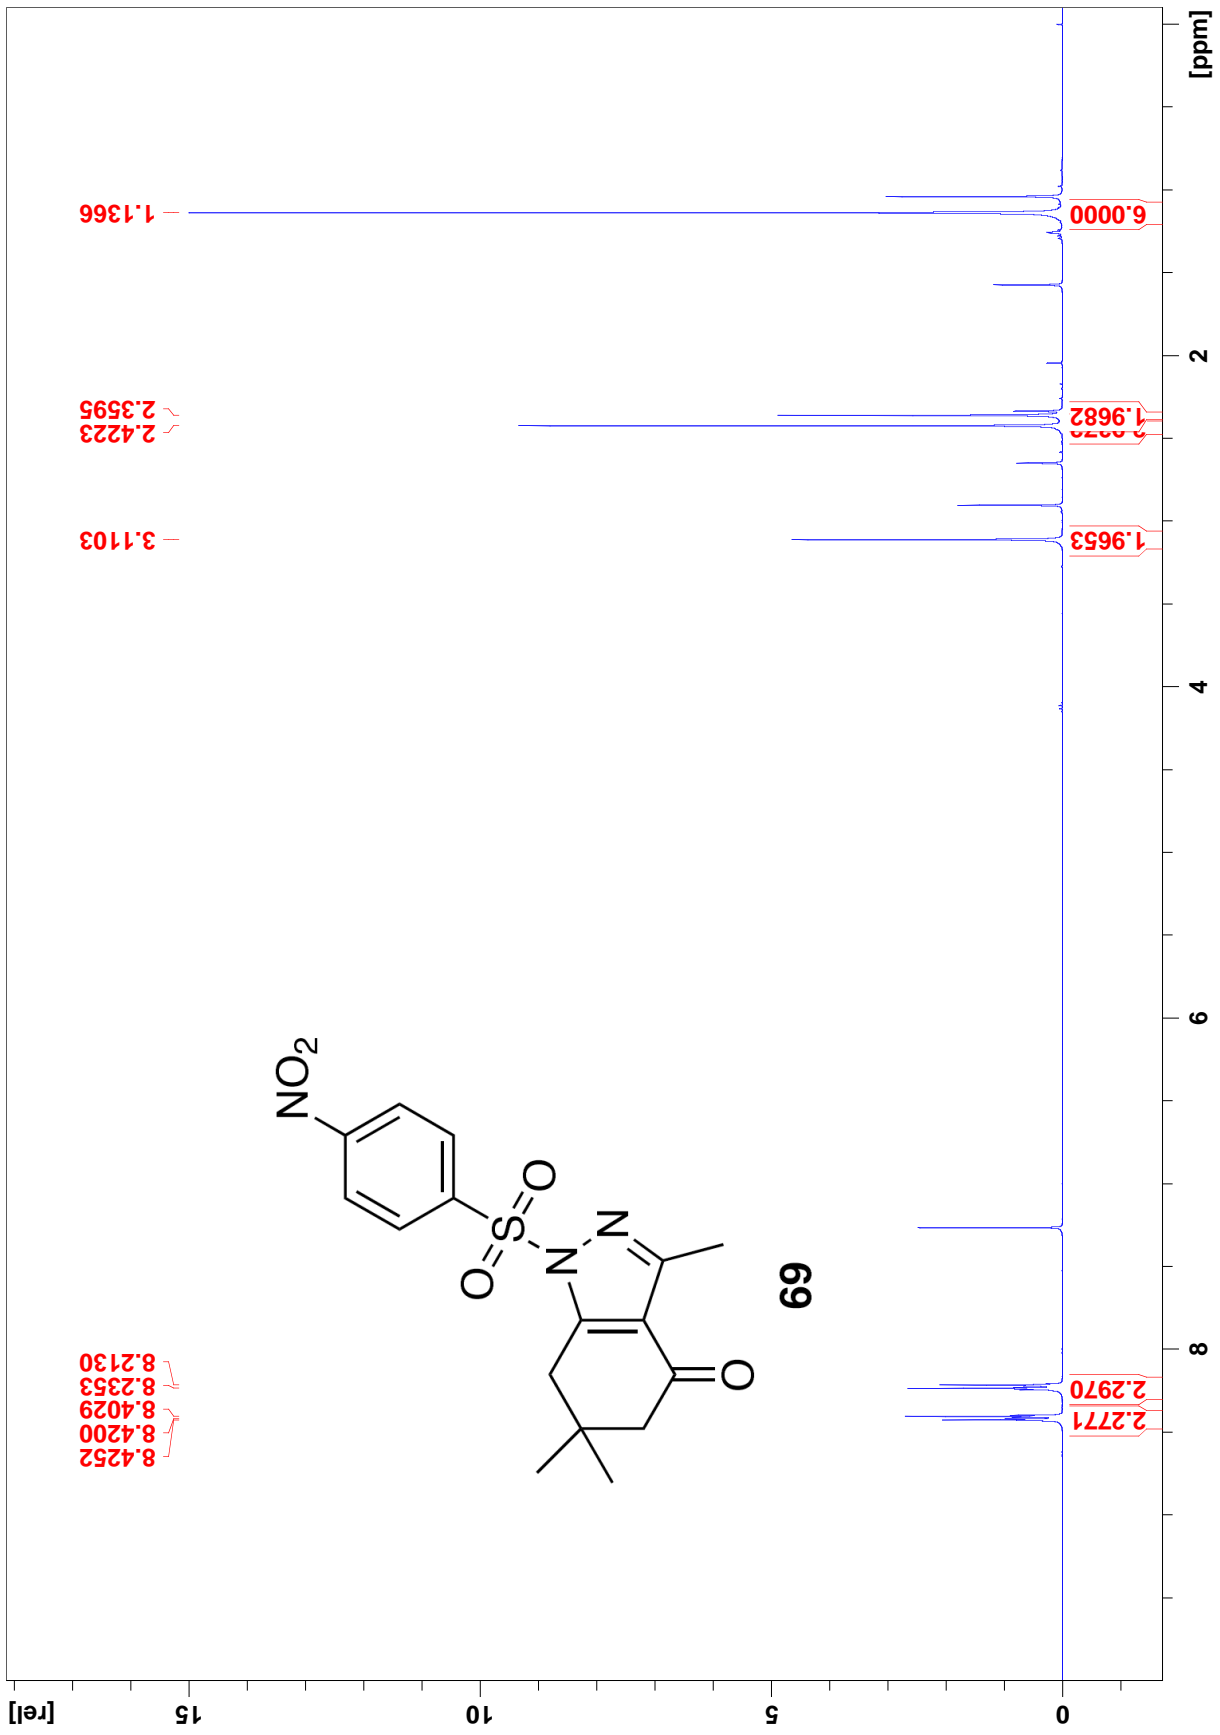

# 13C-NMR

JL09-102109A 3 1 C:\Bruker\TOPSPIN leex3451

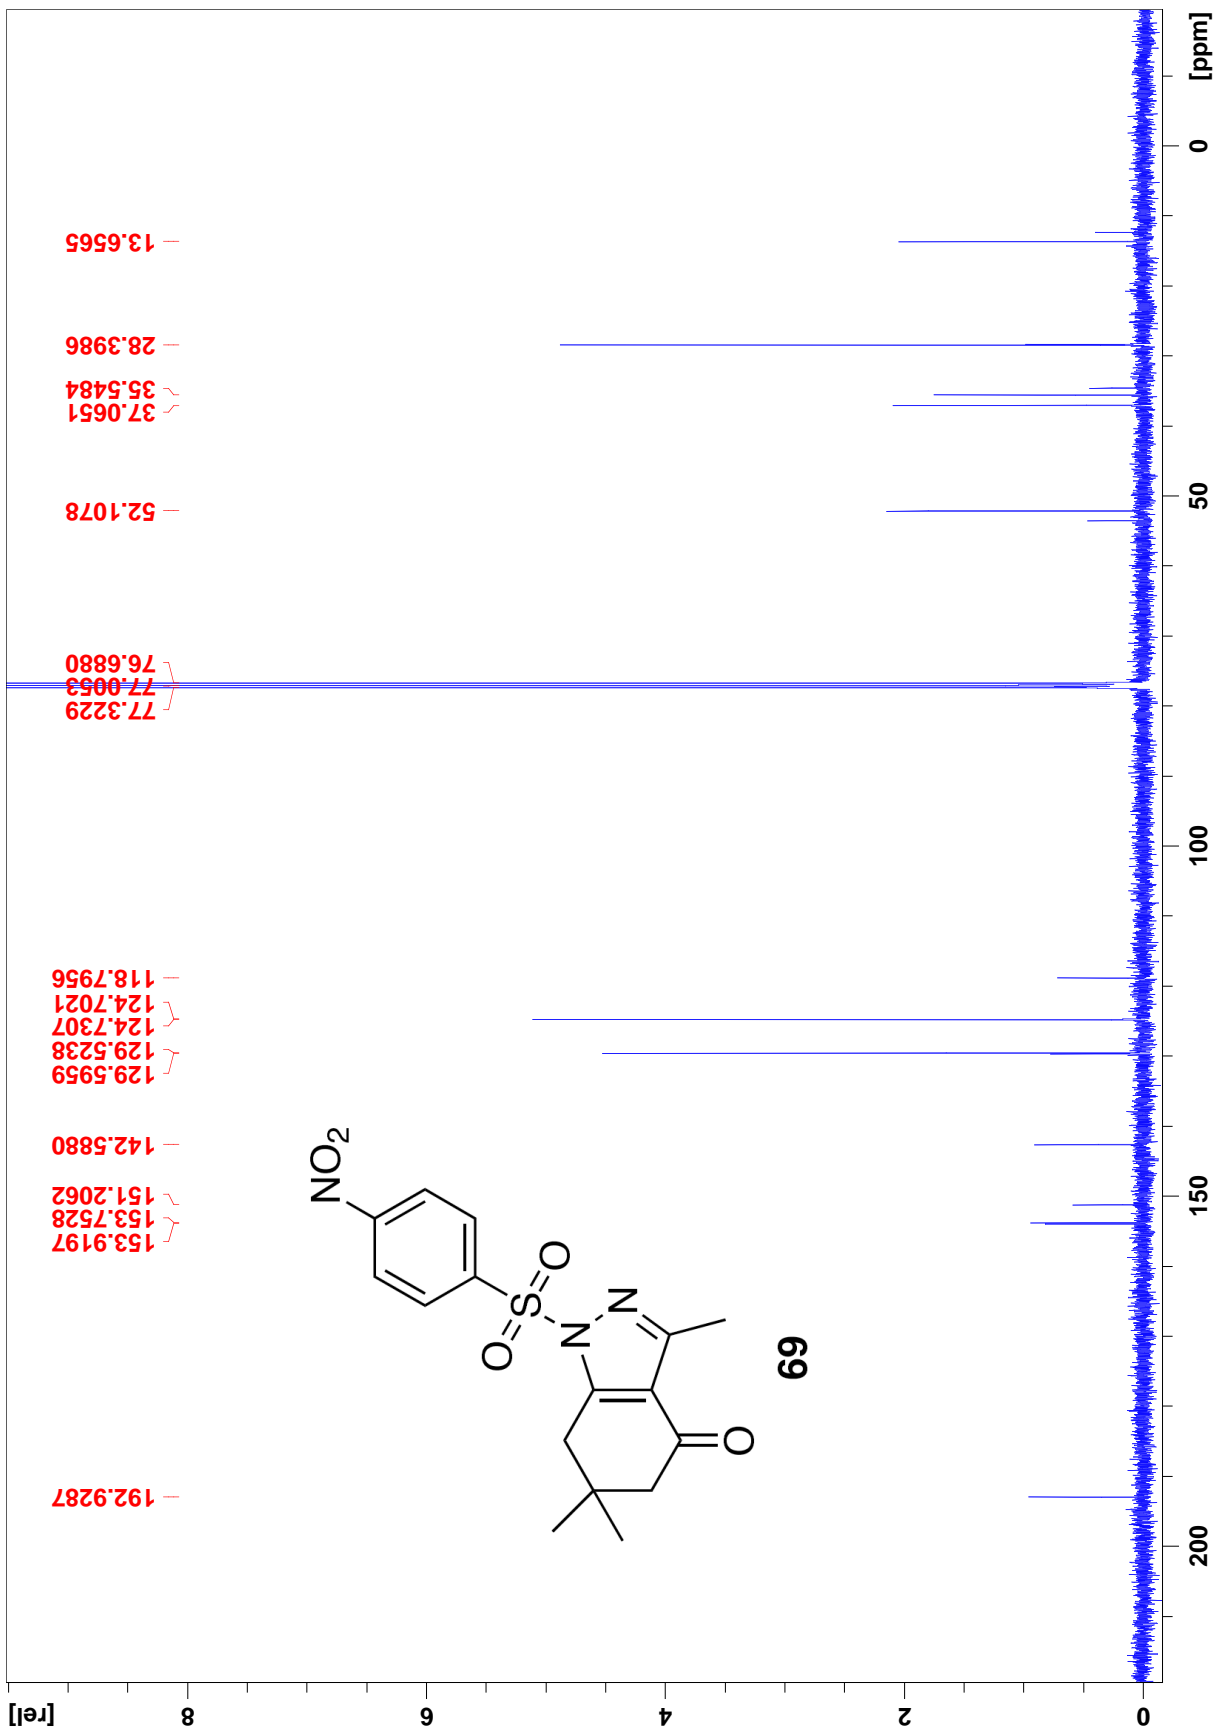

# 1H-NMR

JL09-102609A 1 1 C:\Bruker\TOPSPIN leex3451

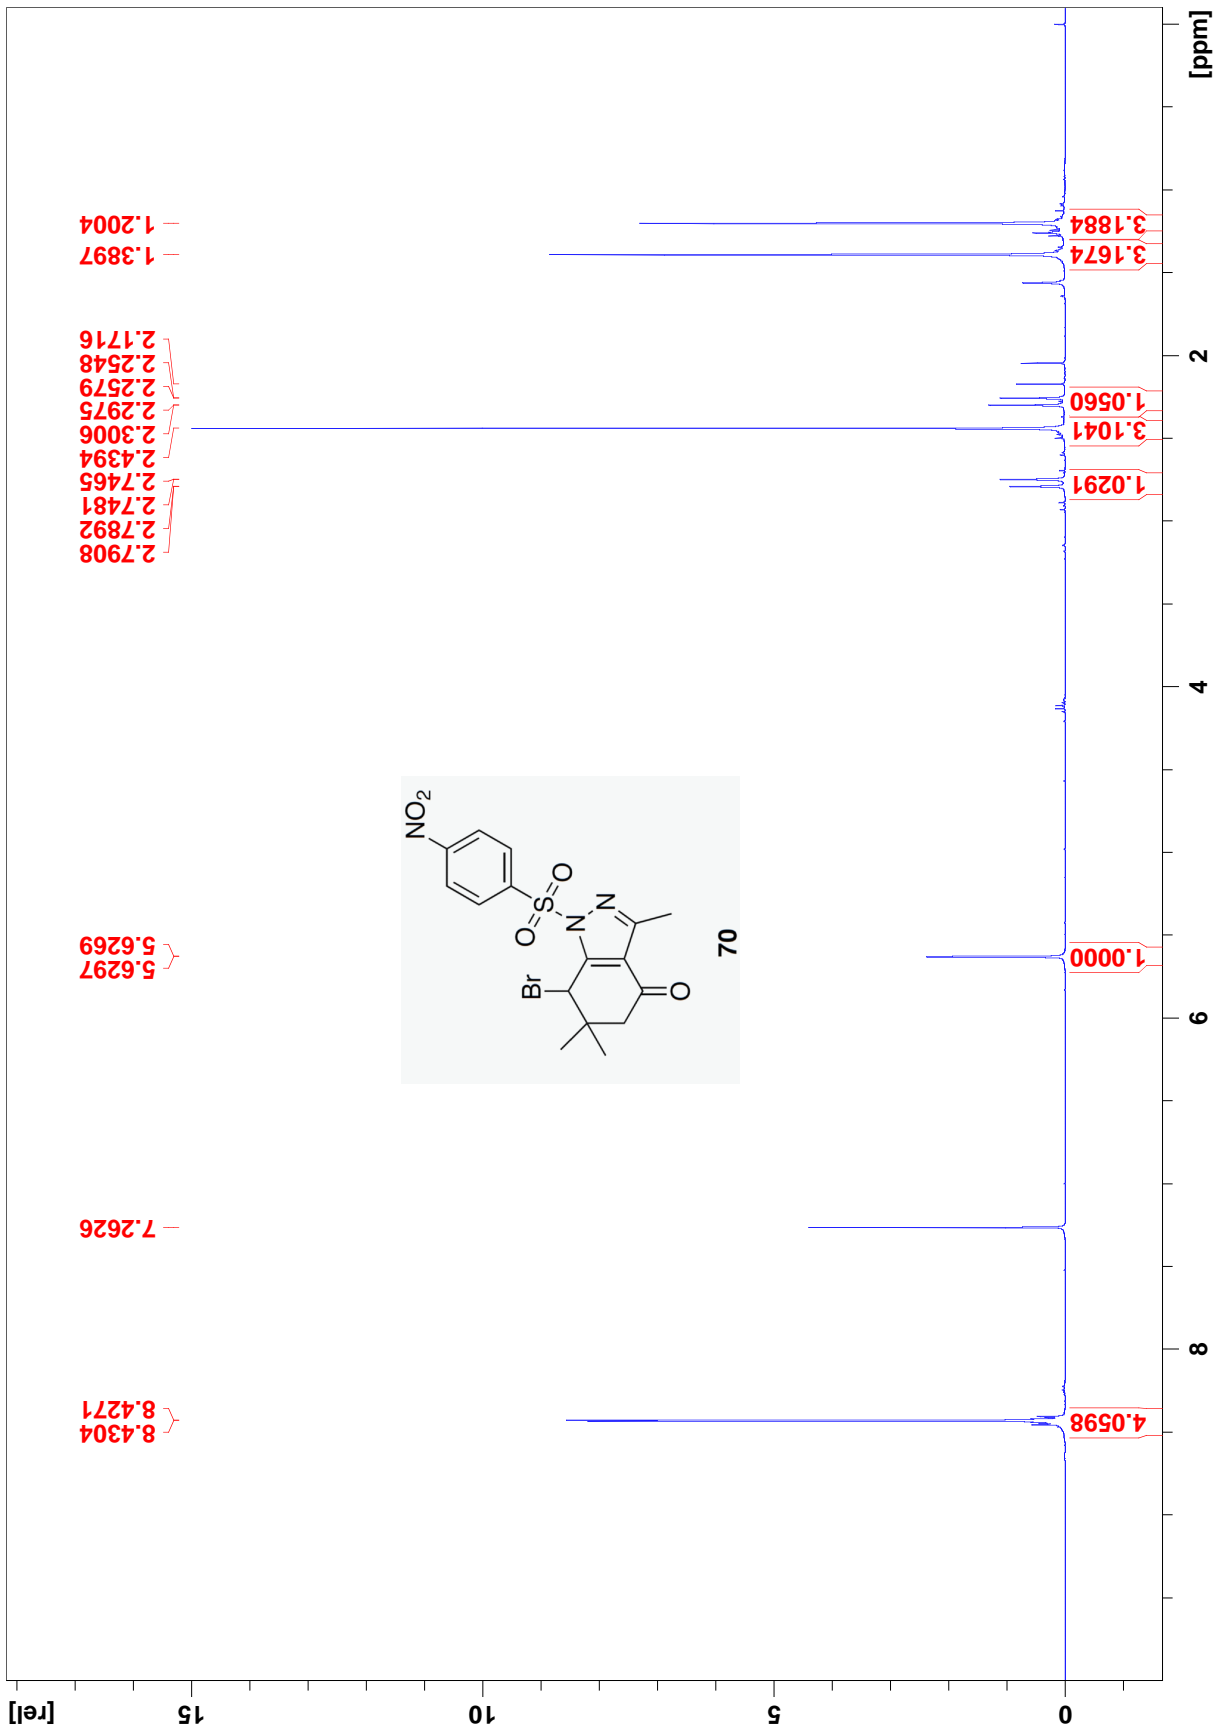

# 13C-NMR

JL09-102609A 3 1 C:\Bruker\TOPSPIN leex3451

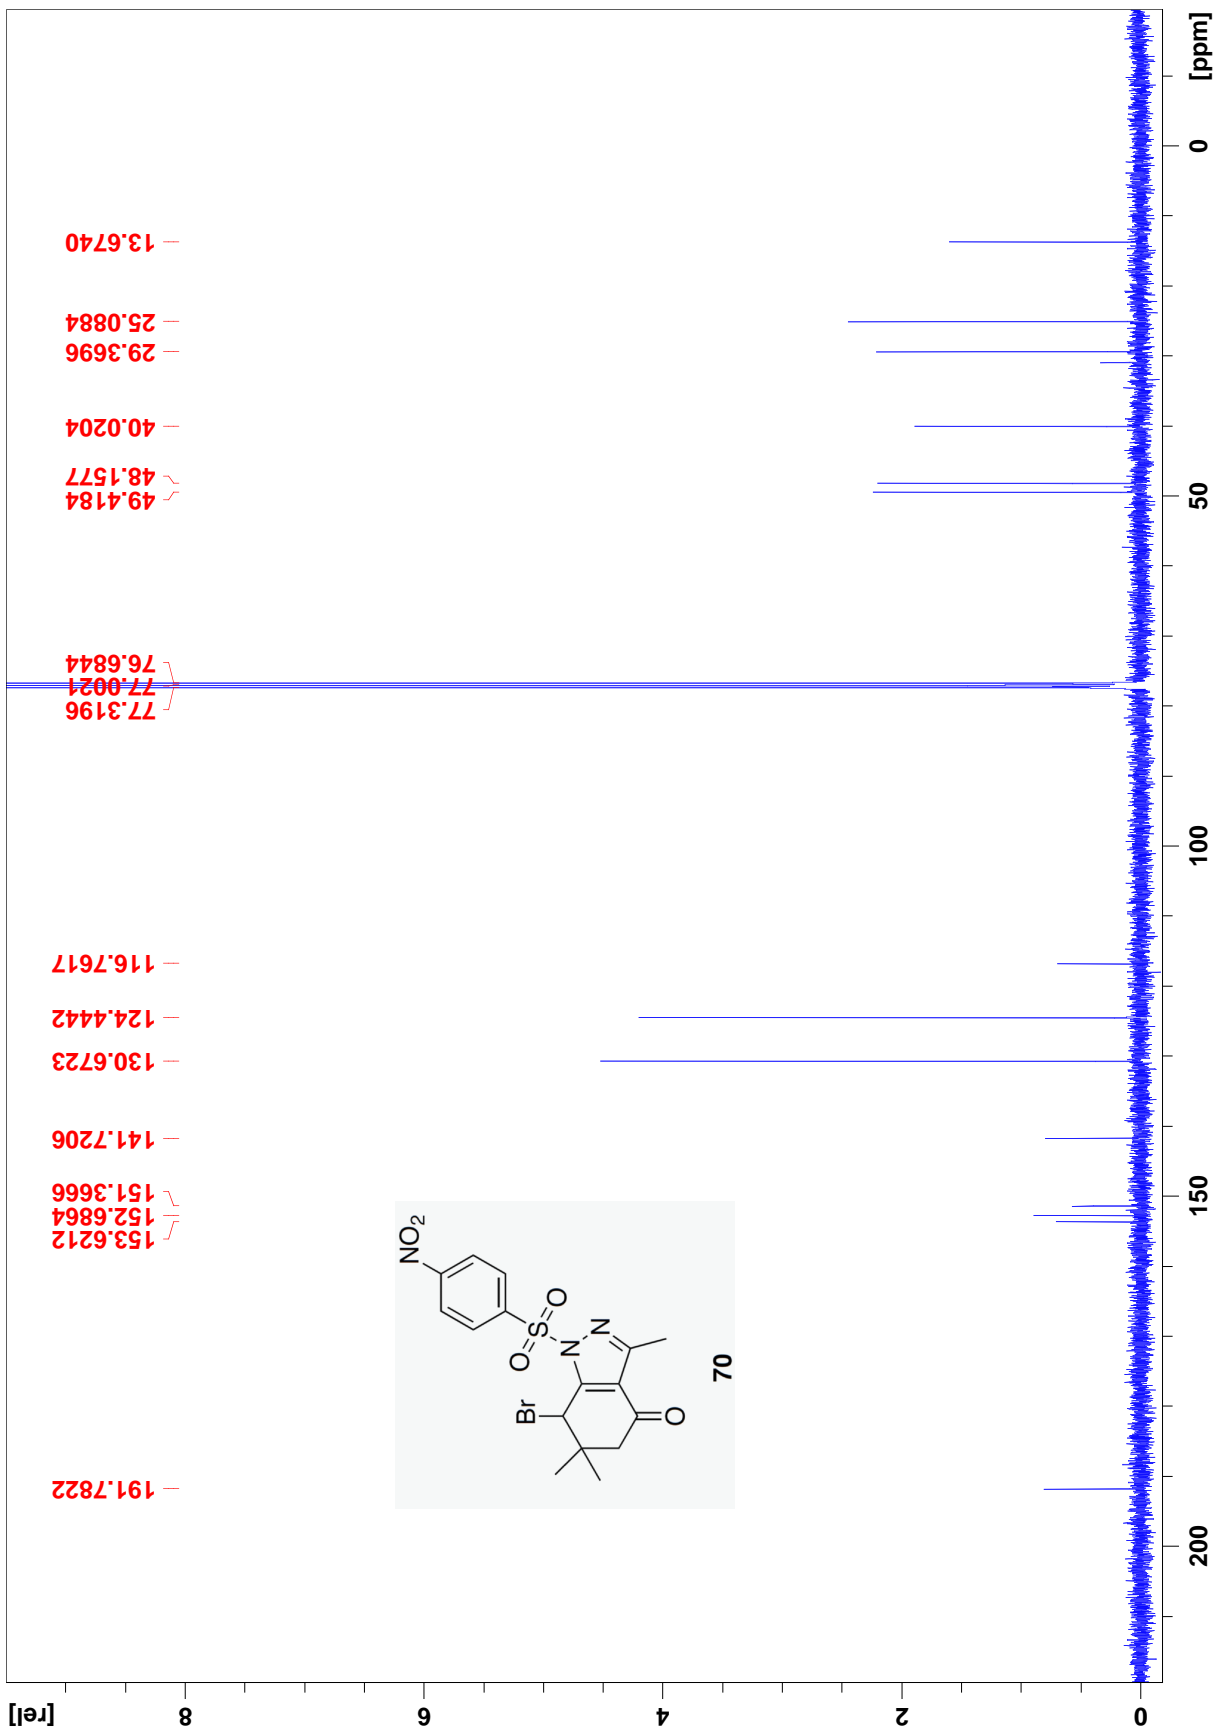

# 1H-NMR

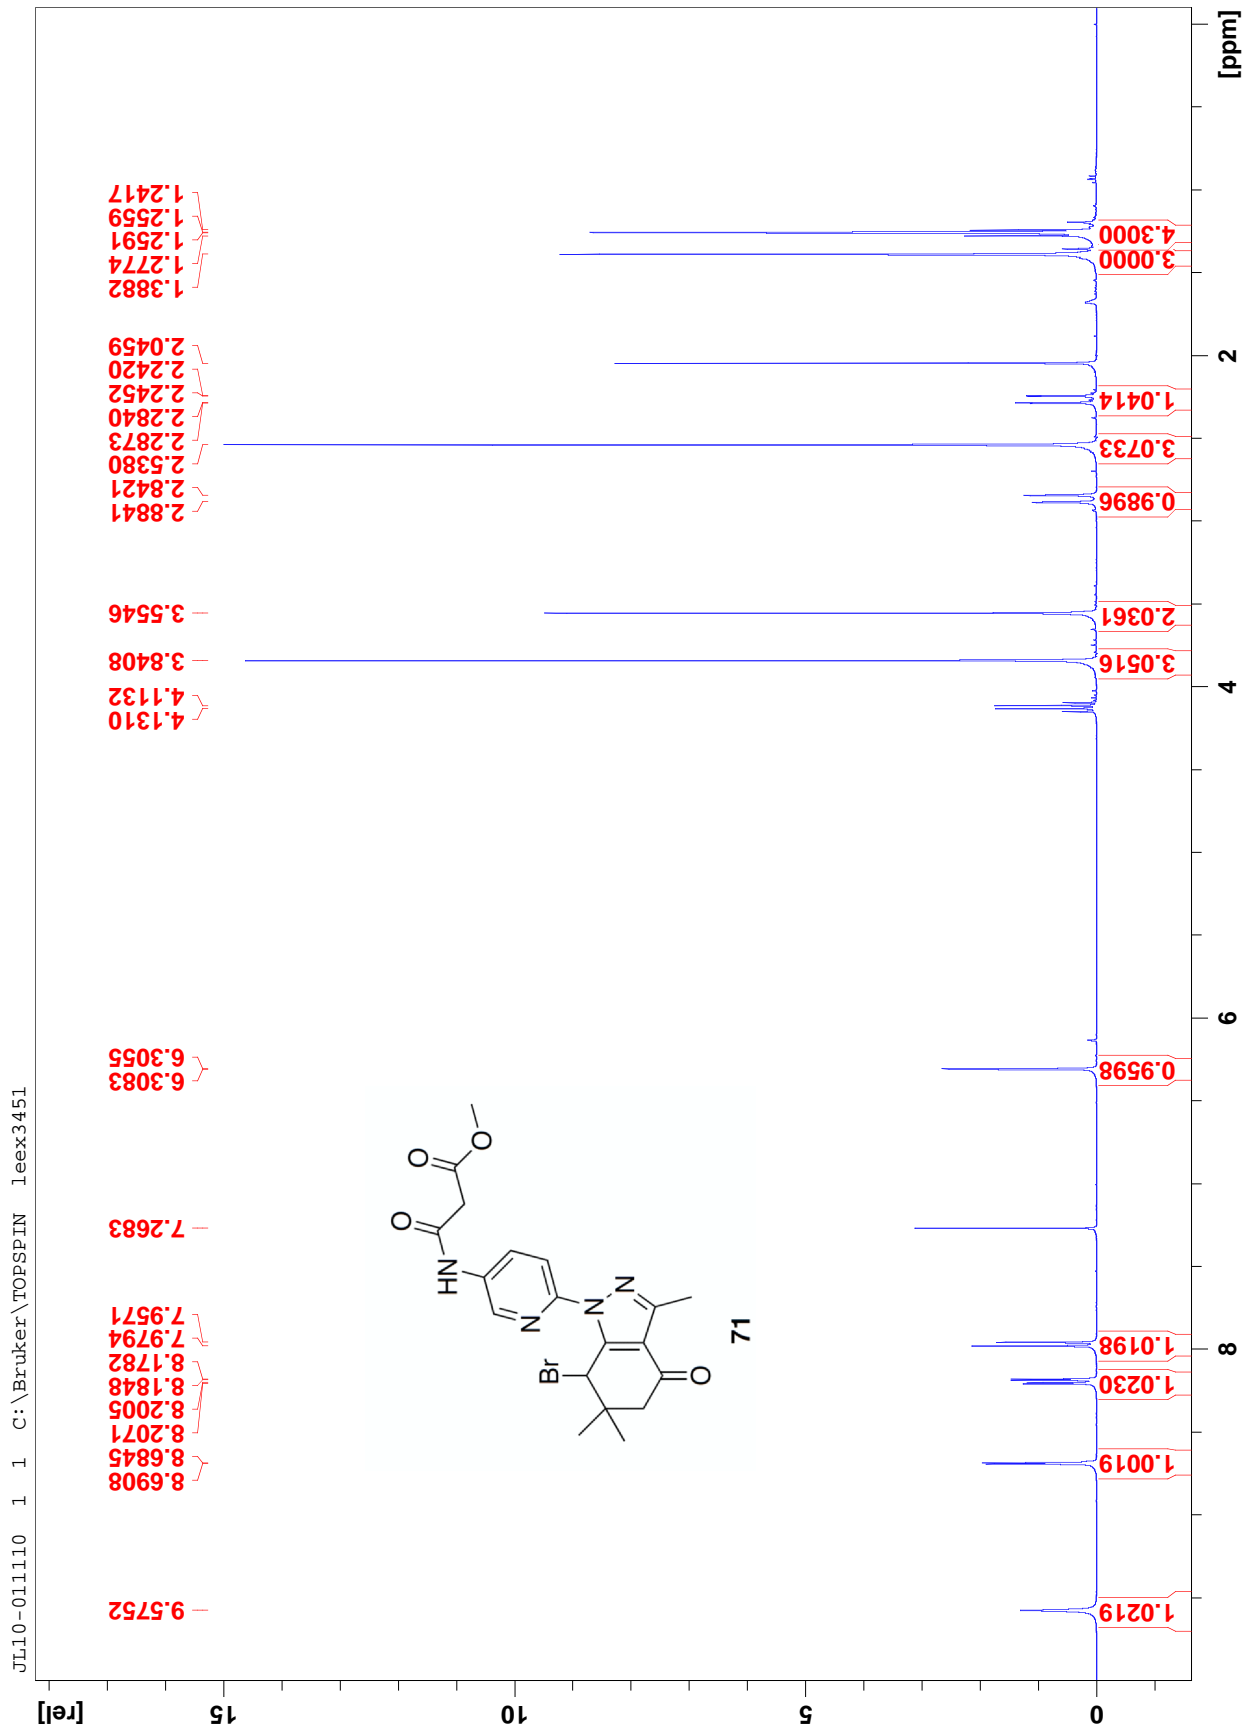

# 13C-NMR

JL10-011110 3 1 C:\Bruker\TOPSPIN leex3451

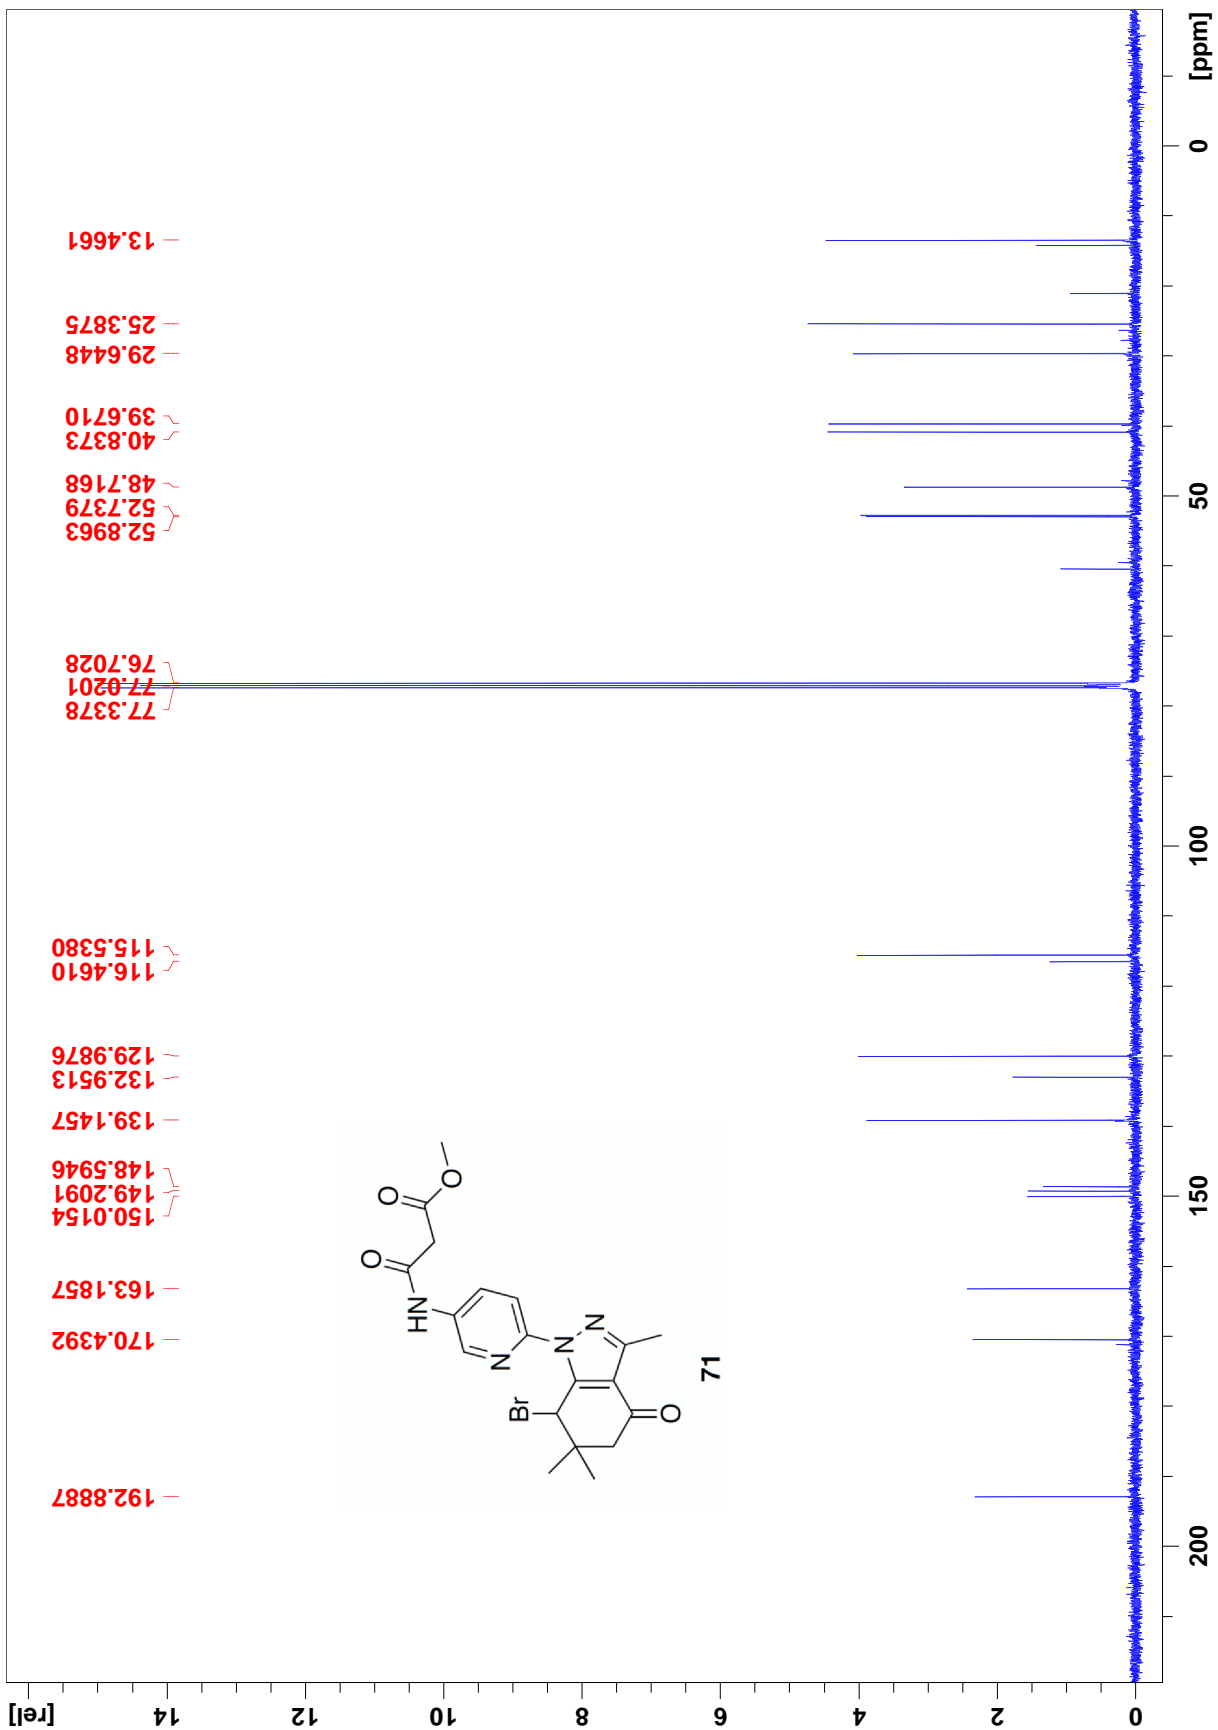

# 1H-NMR

JL10-011410 1 1 C:\Bruker\TOPSPIN leex3451

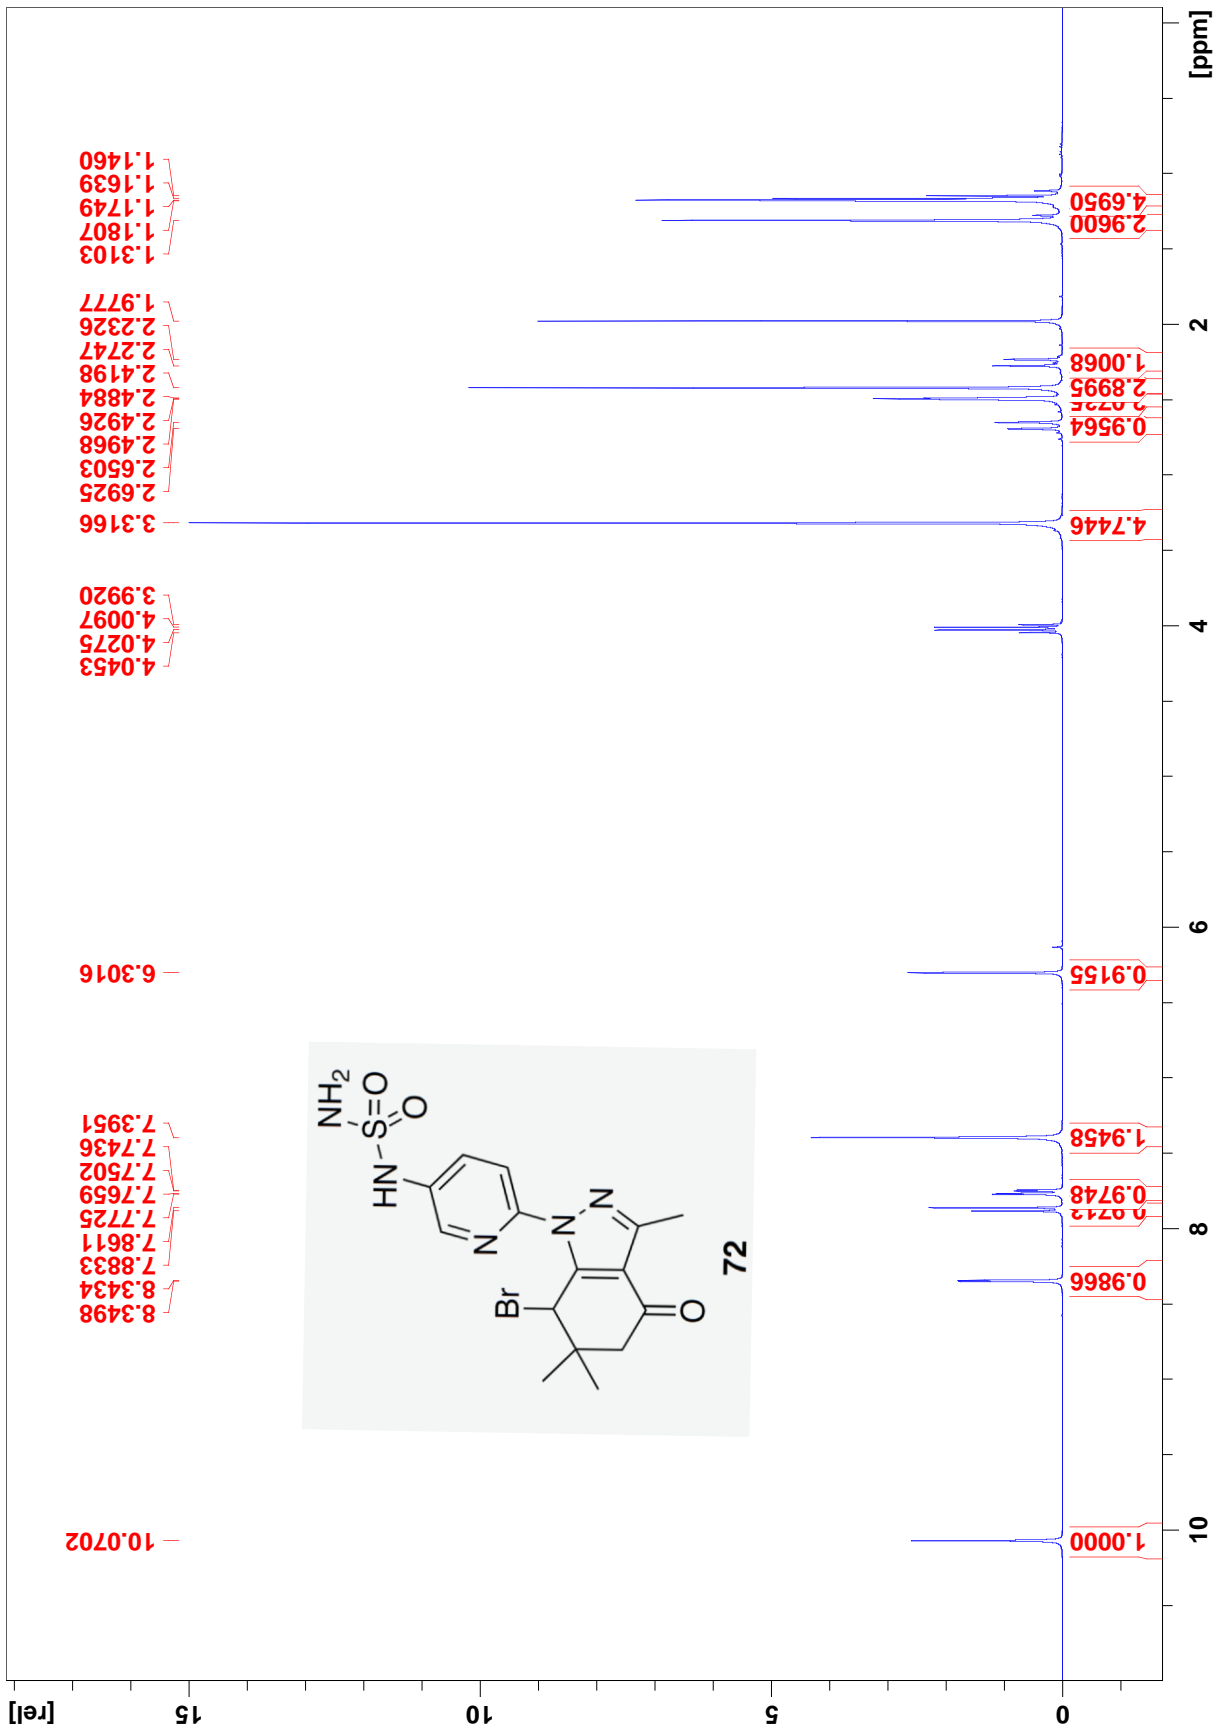



# 13C-NMR

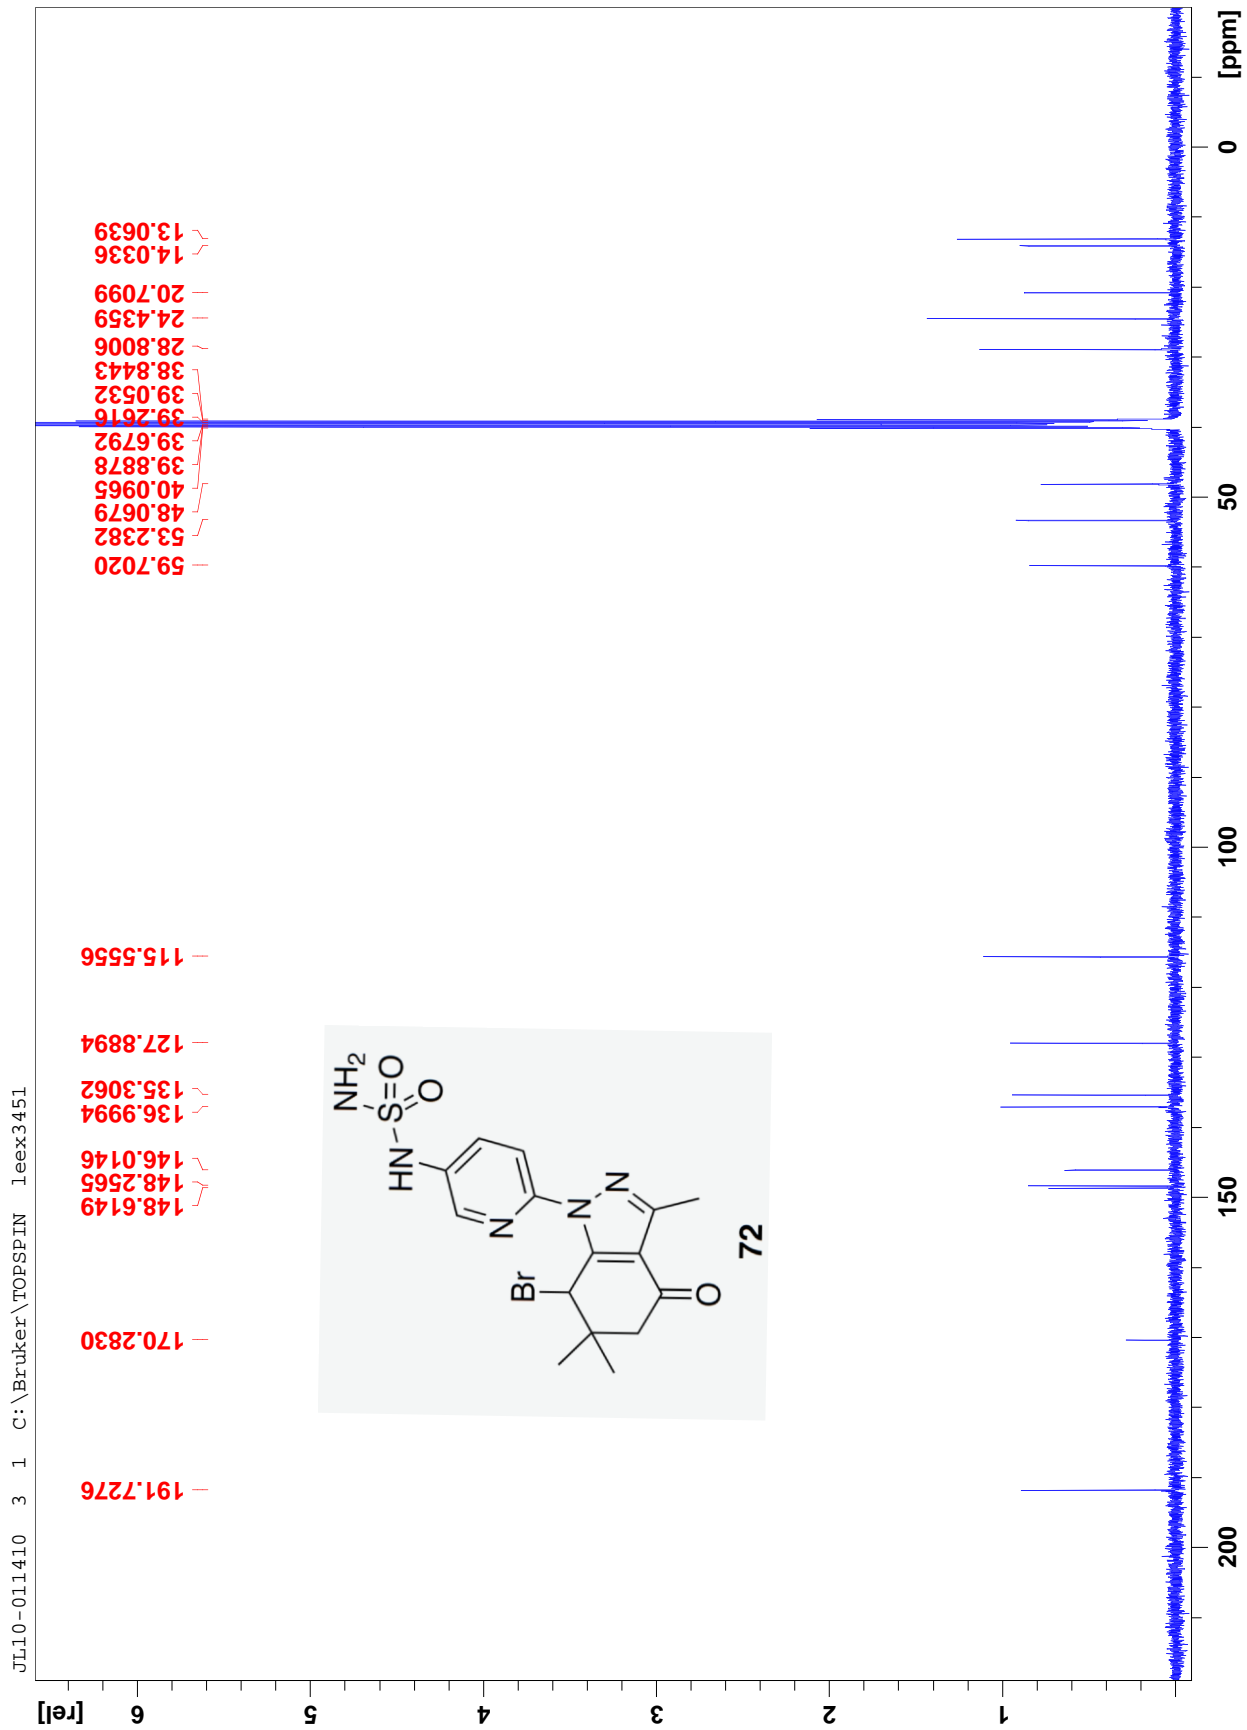

# 1H-NMR

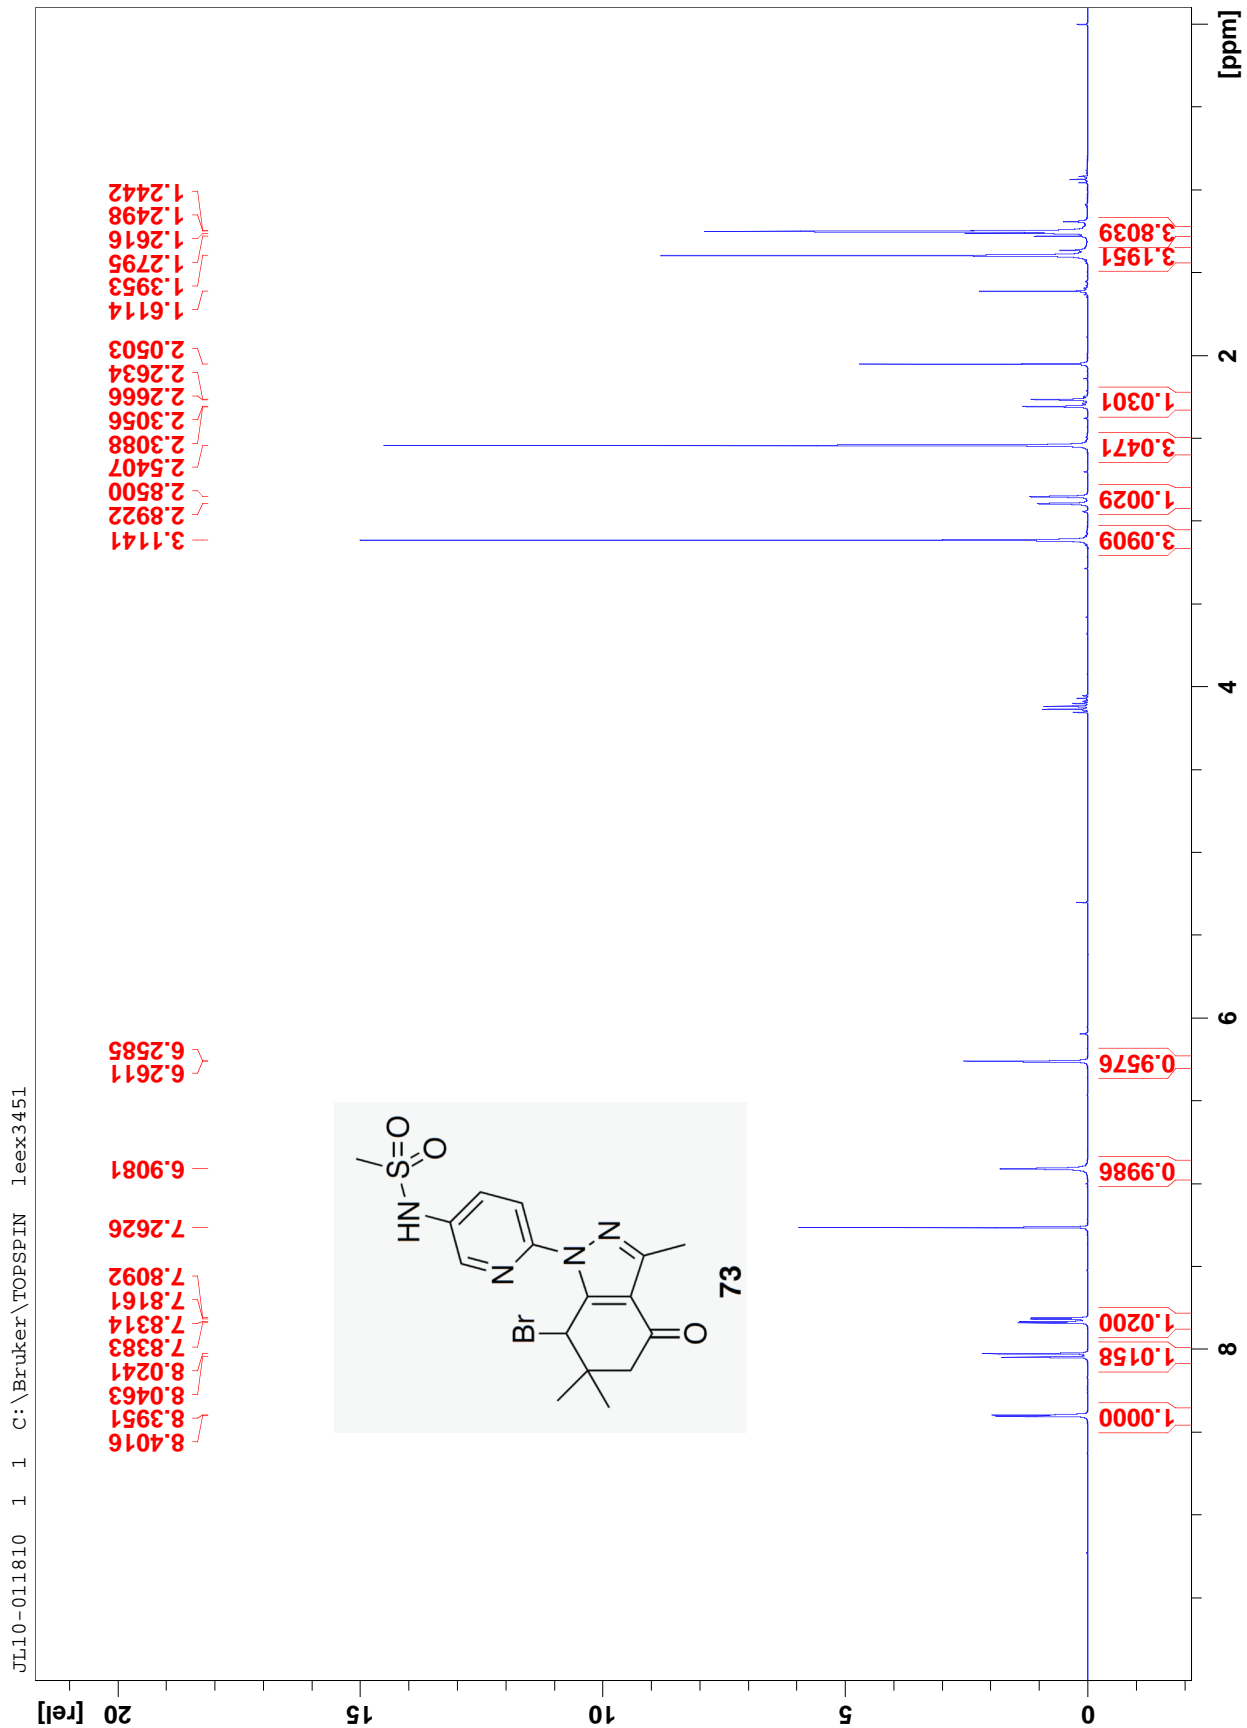

# 13C-NMR

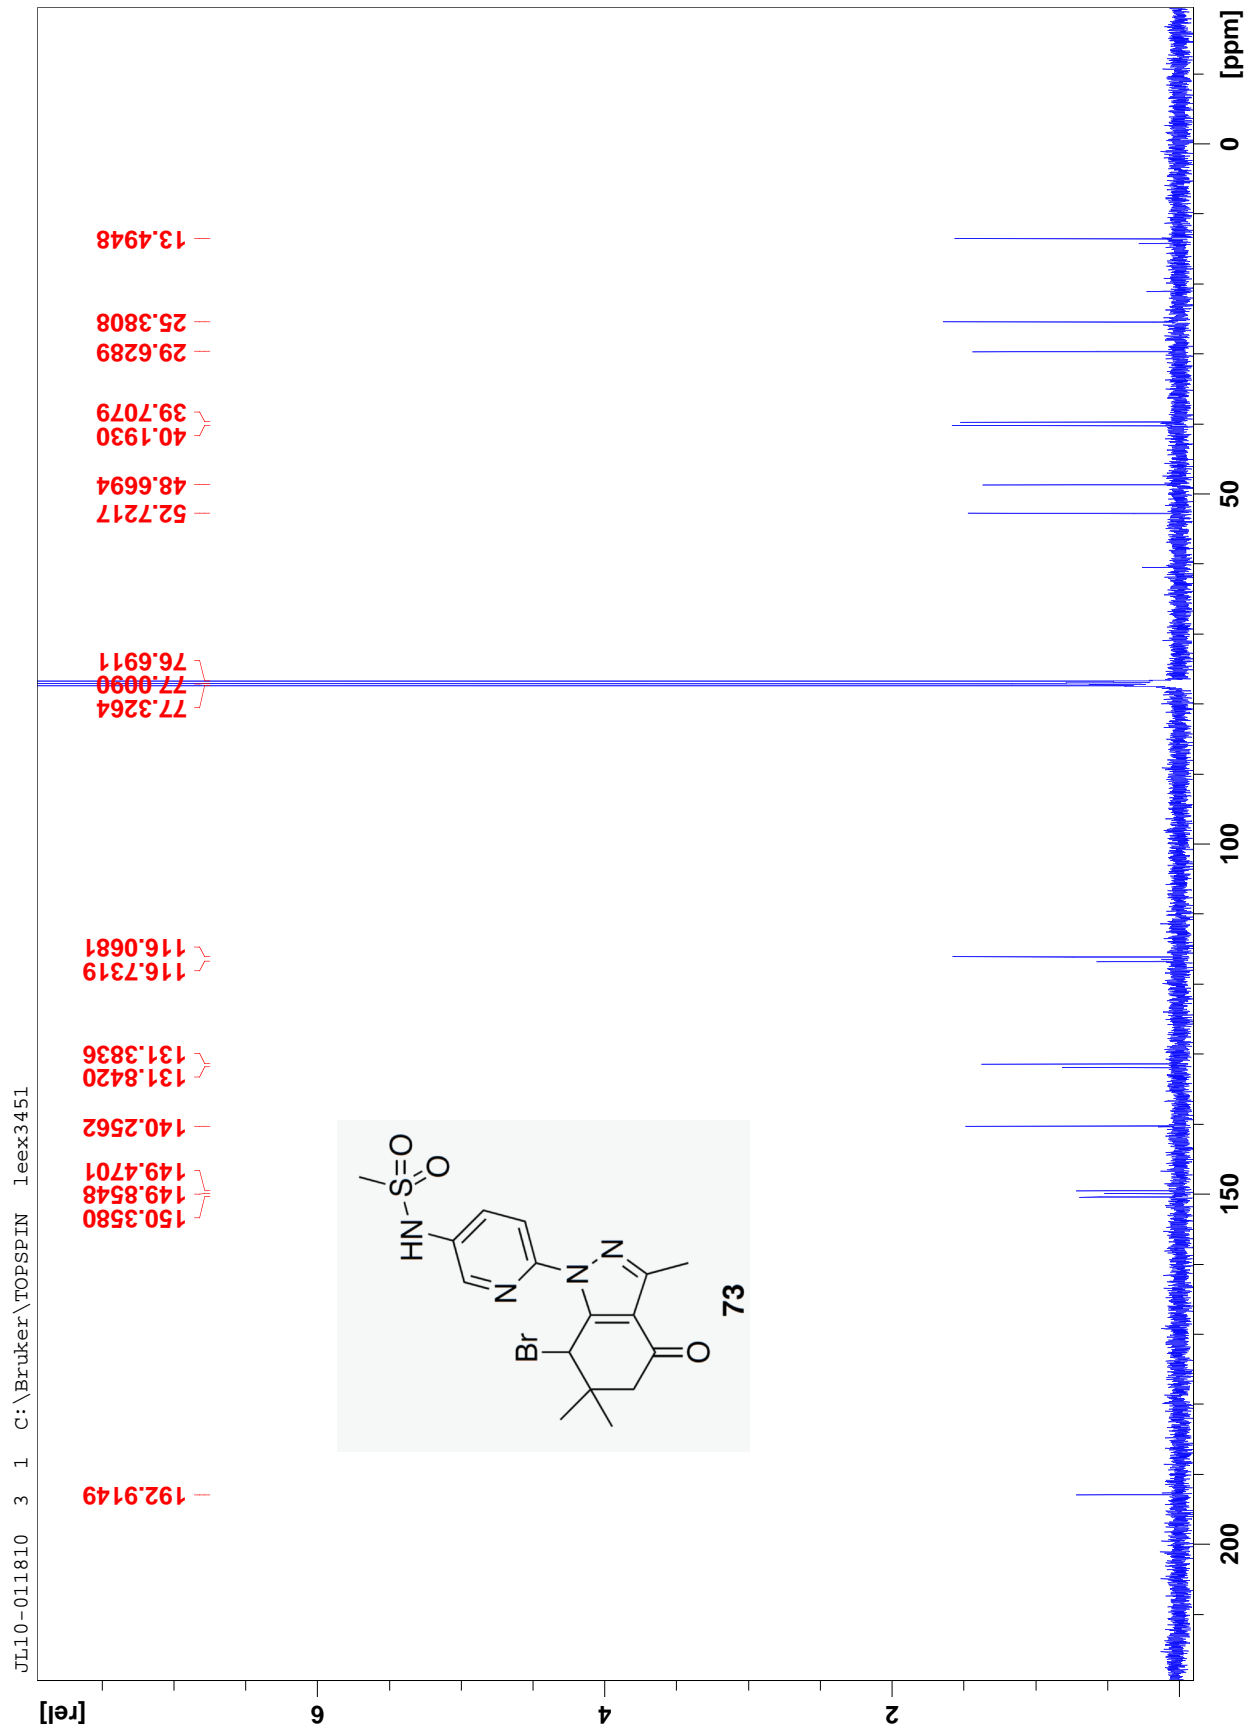

# 1H-NMR

JL110-01.2010 1 1 C:\Bruker\TOPSPIN leex3451

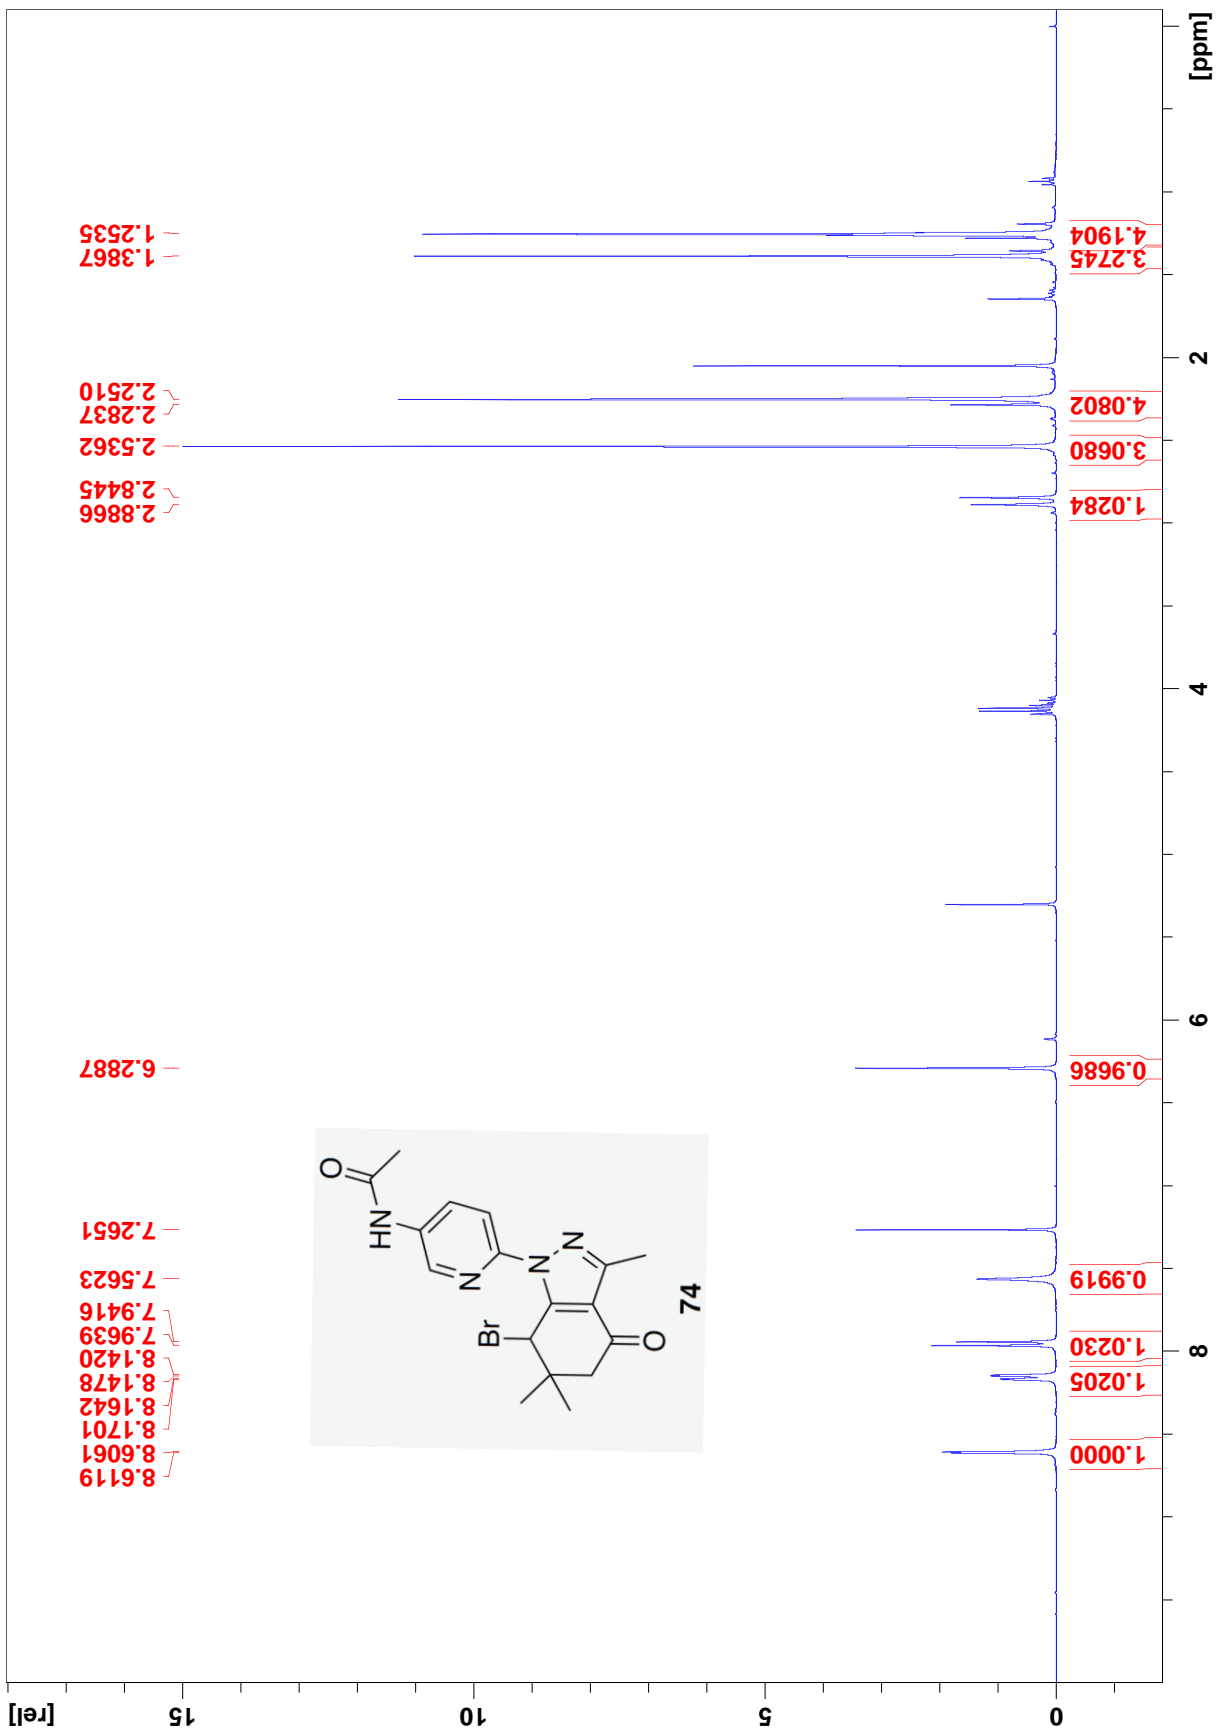

# 13C-NMR

JL110-01.2010 3 1 C:\Bruker\TOPSPIN leex3451

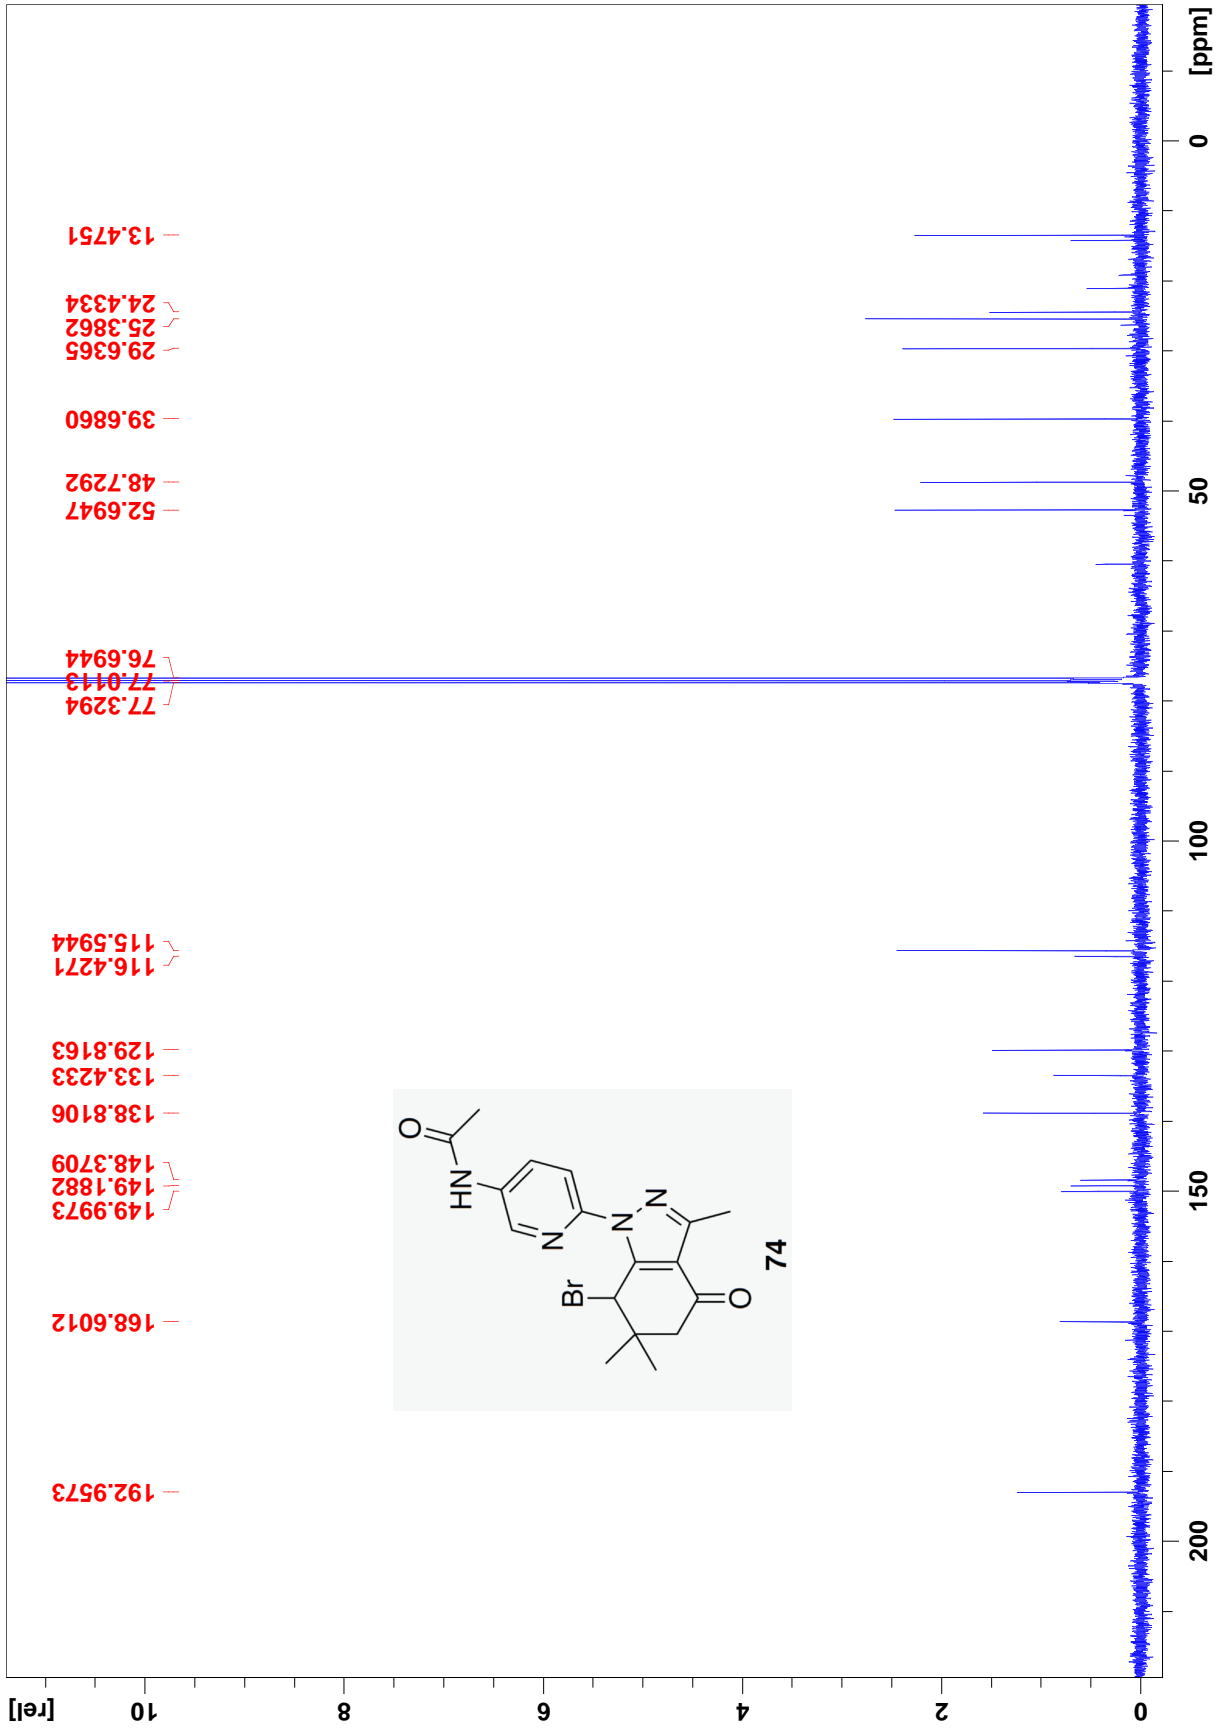

# 1H-NMR

JL110-010510B 1 1 C:\Bruker\TOPSPIN leex3451

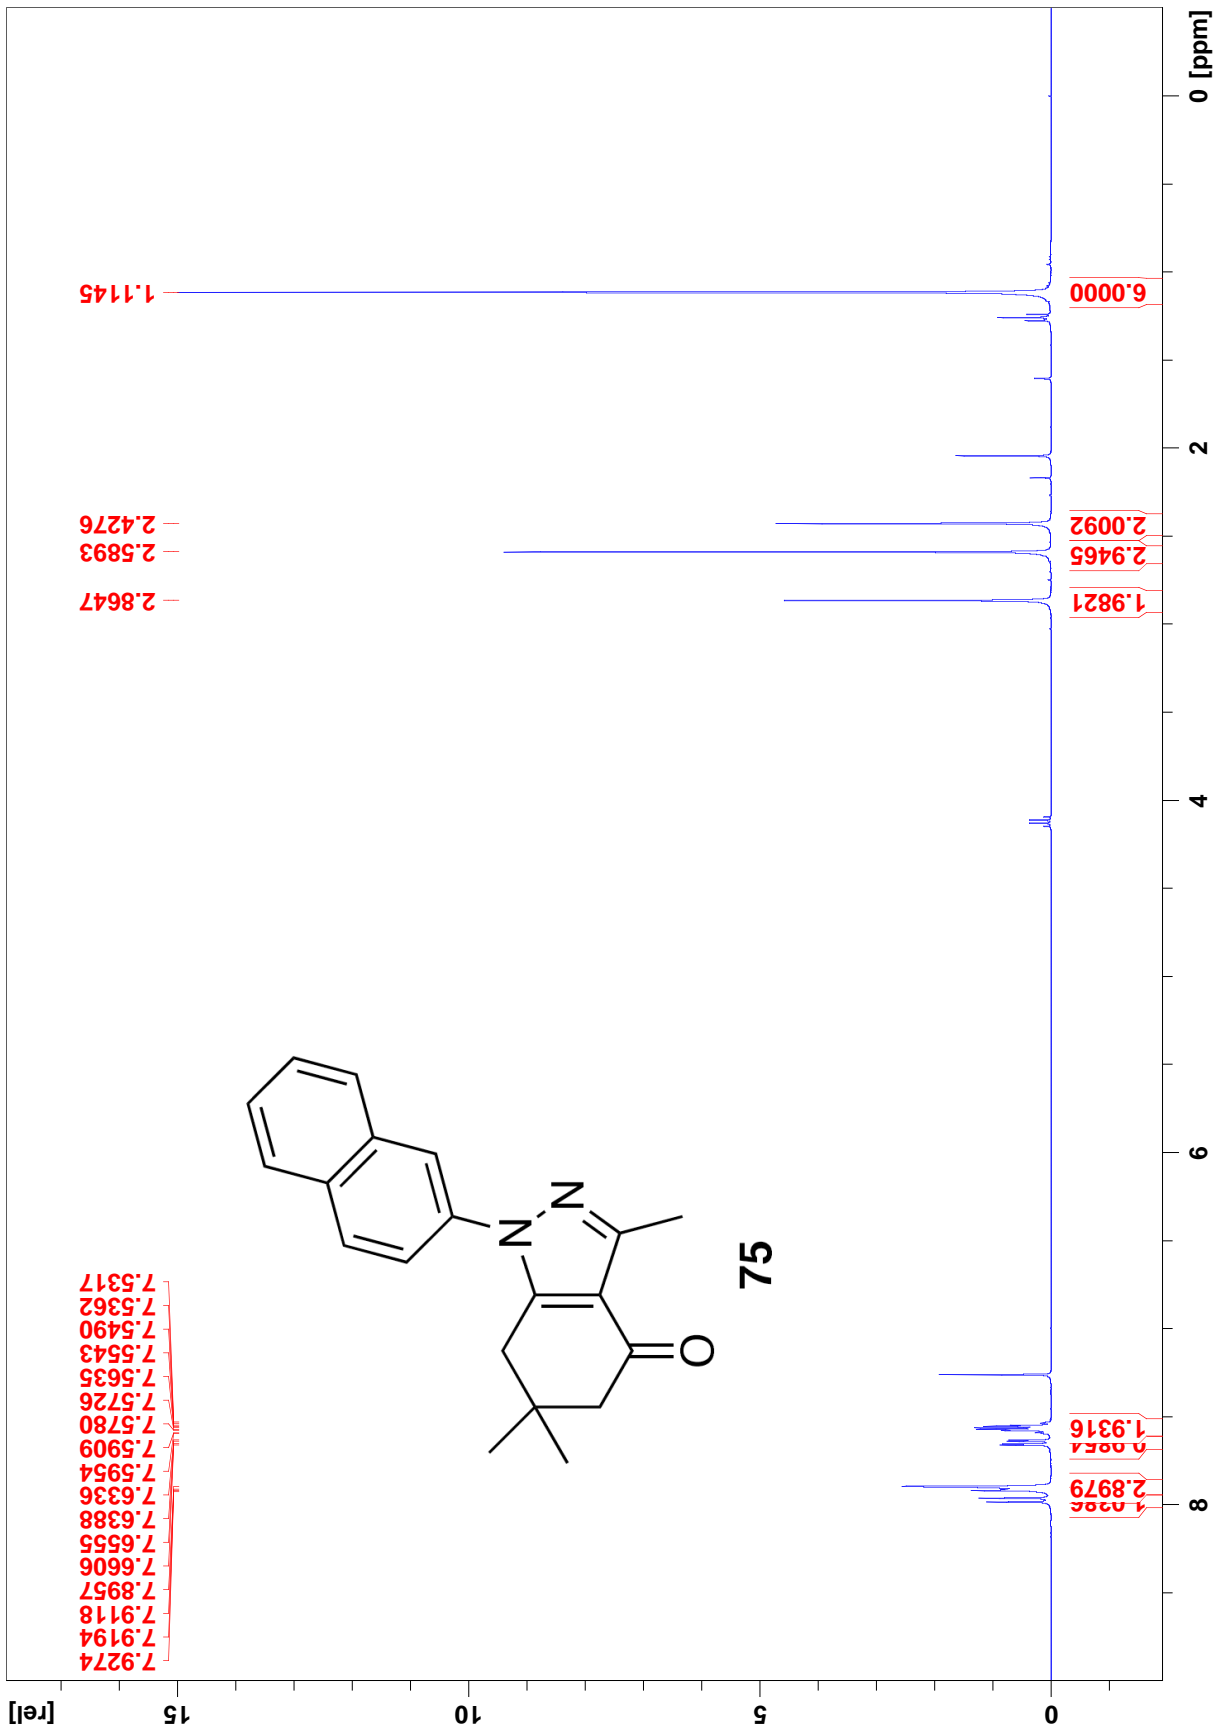

# 13C-NMR

JL10-010510B 3 1 C:\Bruker\TOPSPIN leex3451

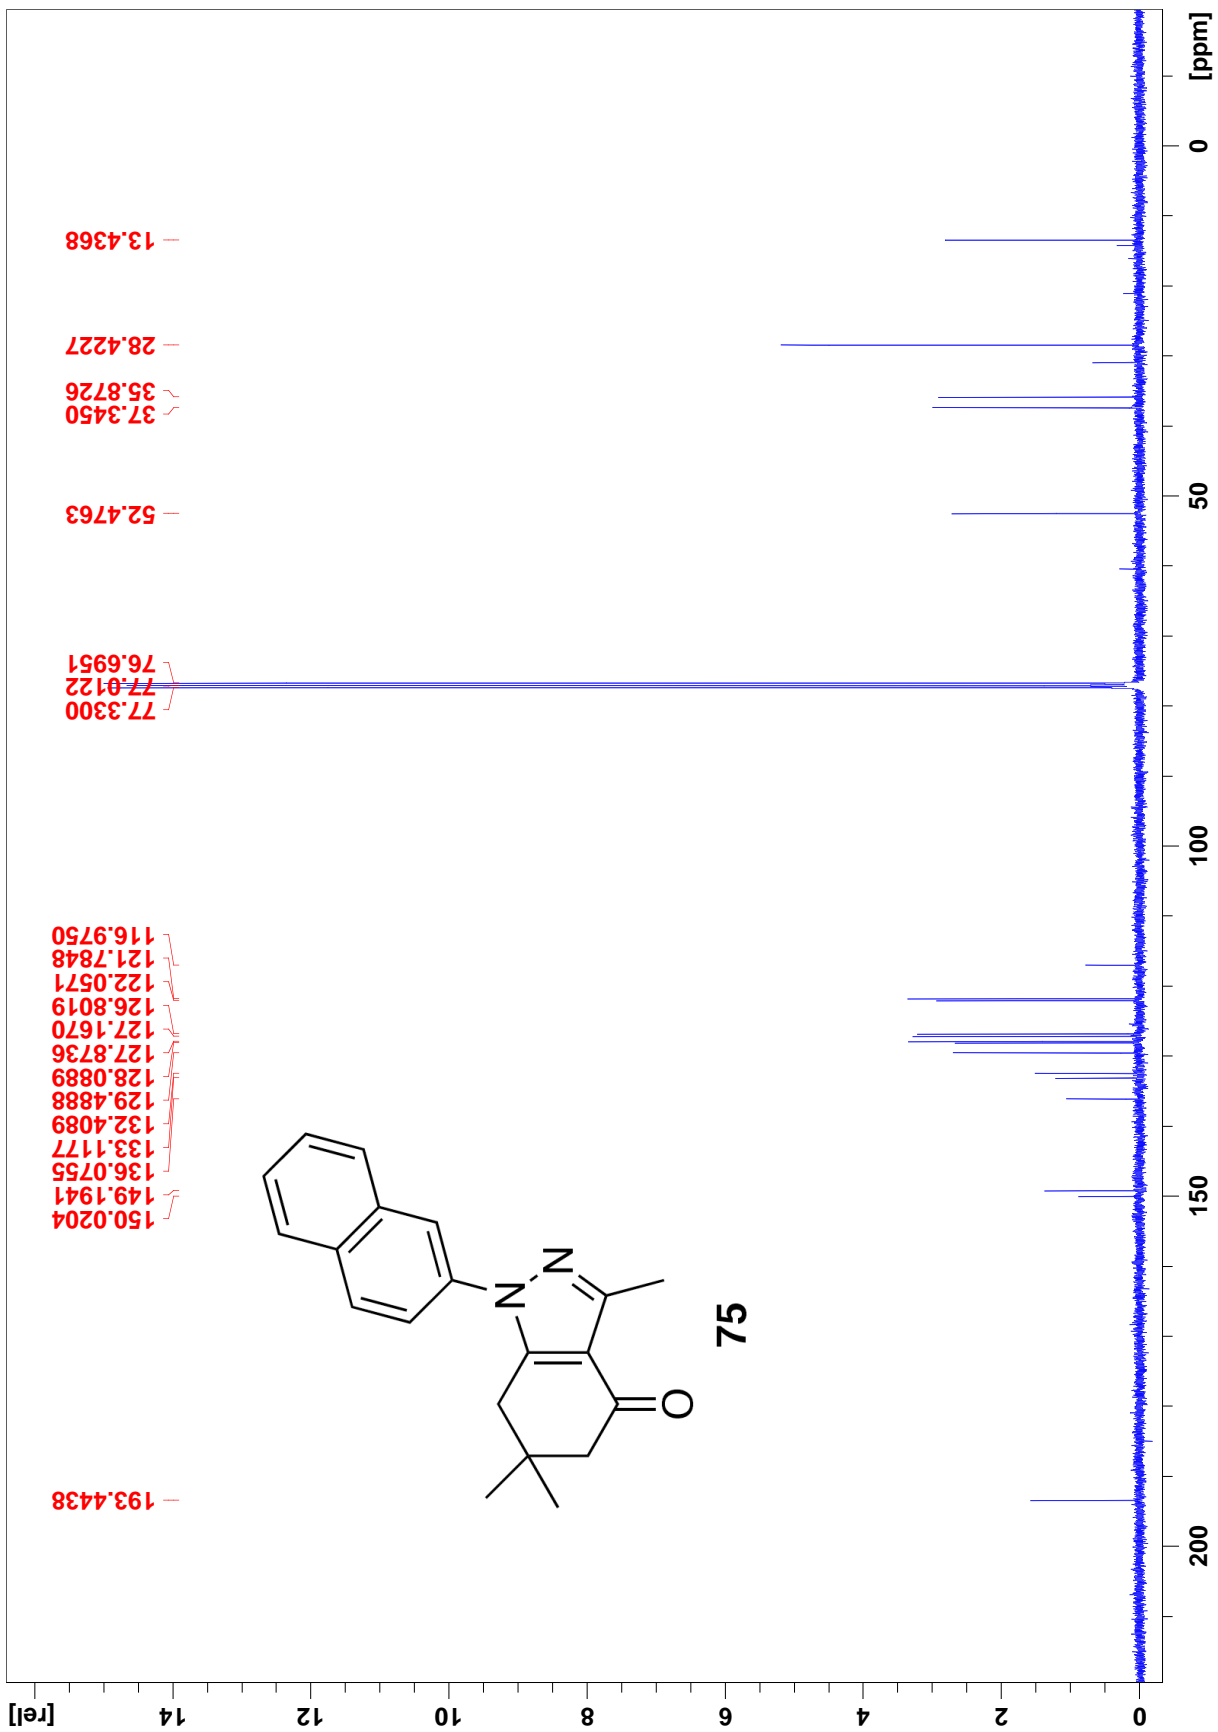

# 1H-NMR

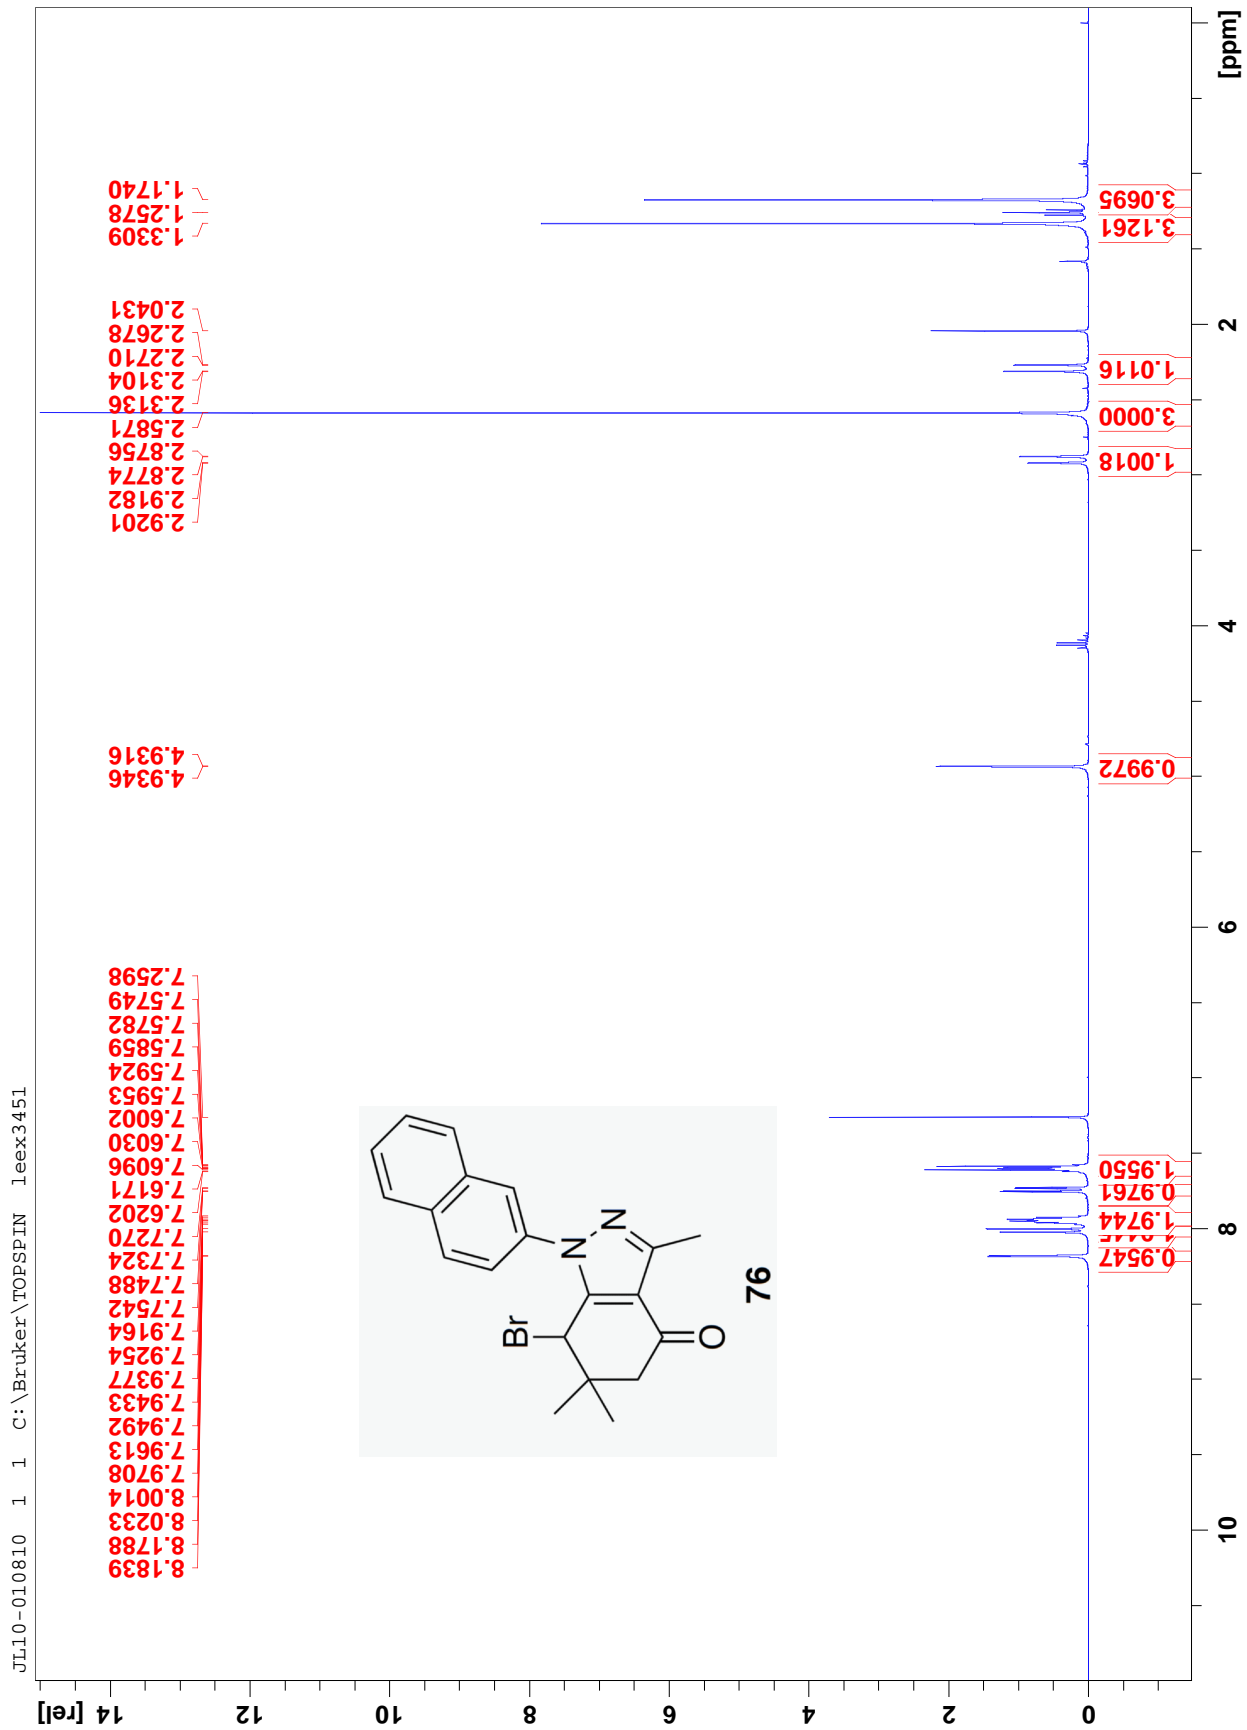



# 13C-NMR

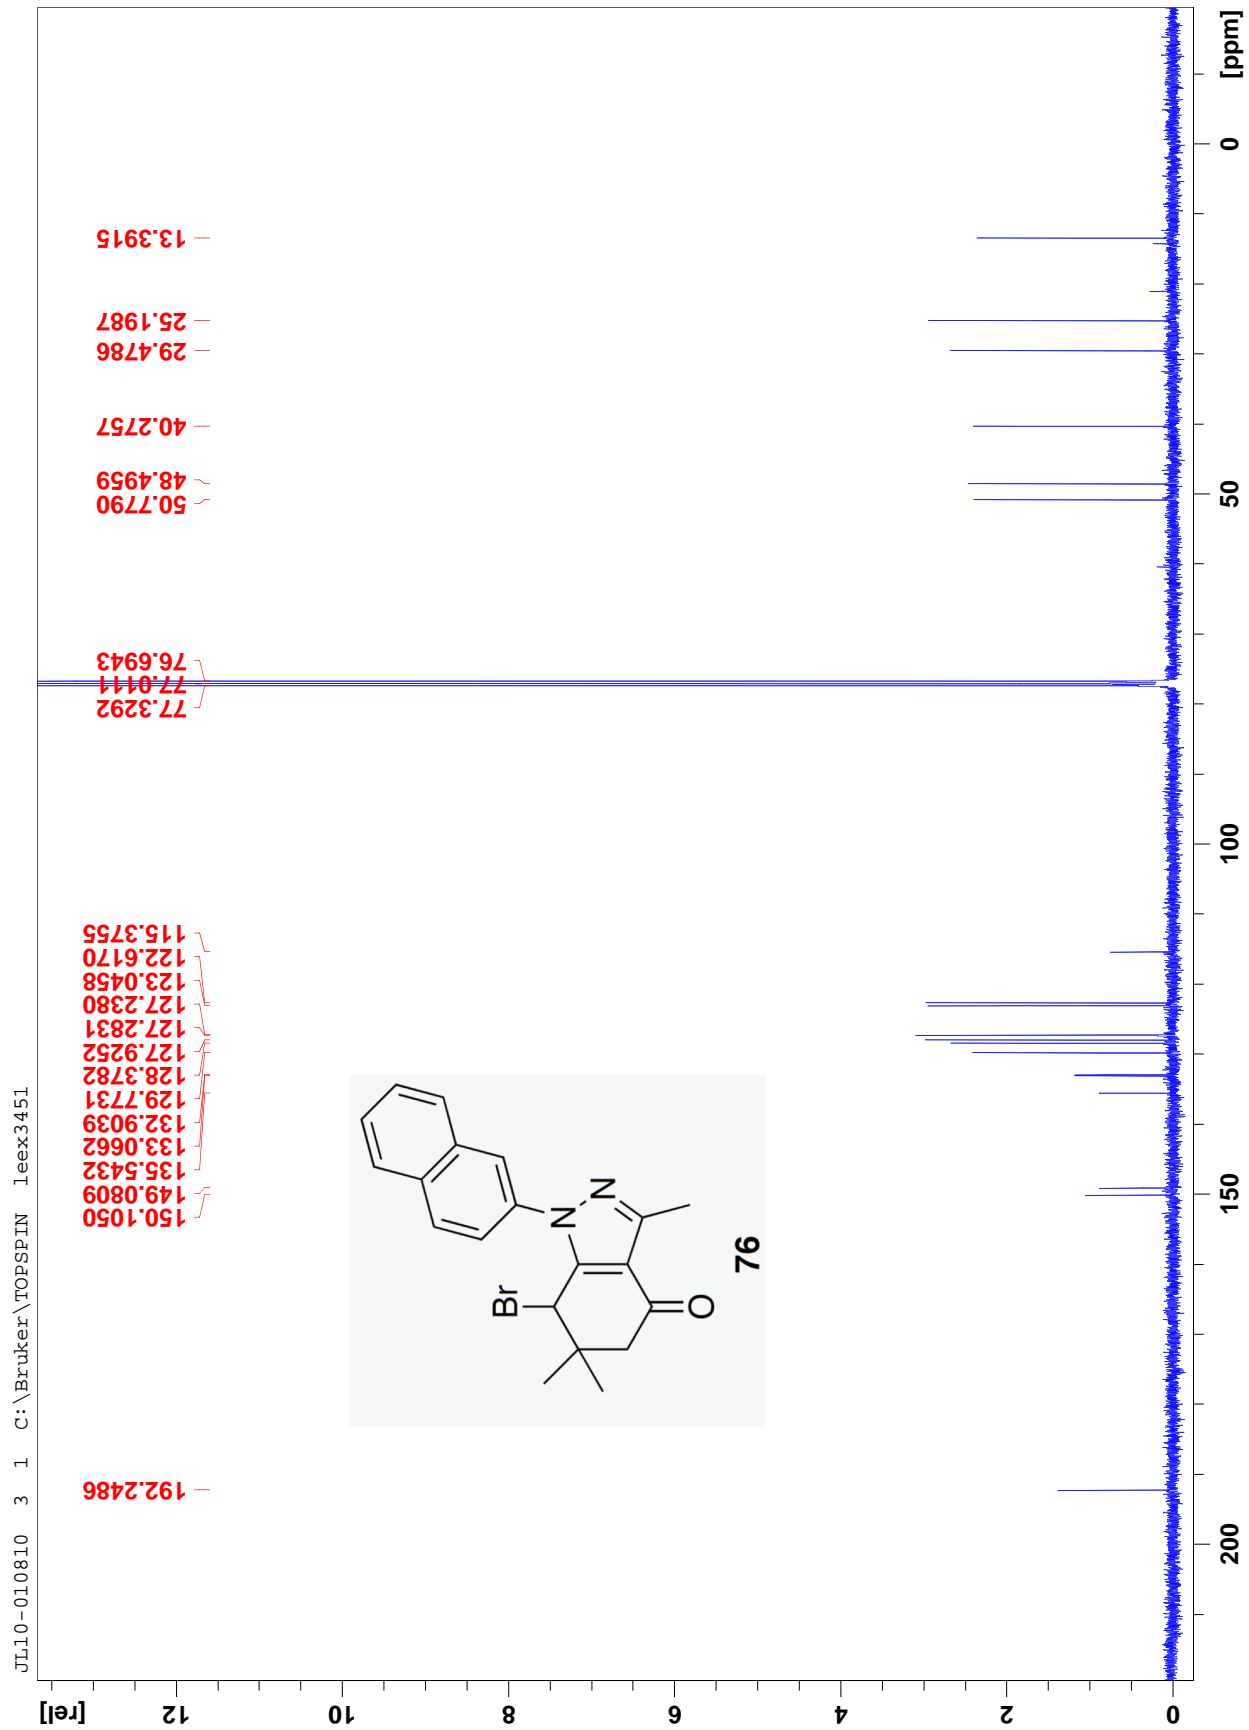

Supplement: NIHMS1668598-supplement-1.pdf [file NIHMS1668598-supplement-1.pdf]
